# Supplementary material for: A novel haemocytometric COVID-19 prognostic score developed and validated in an observational multicentre European hospital-based study
Source: eLife. 2020 Nov 26;9:e63195. doi: 10.7554/eLife.63195 (PMC7732342; doi:10.7554/eLife.63195)
Supplement: Figure 5—source data 1. [file elife-63195-fig5-data1.xlsx]

## Sheet: Sheet1
Figure 5_source data file 3. The number of sample measurements available per day for the trend analysis for the monocyte parameters plotted per patient group
Day	0	1	2	3	4	5	6	7	8	9	10	11	12	13
NC	469	139	146	129	95	65	59	42	31	25	18	12	11	17
CI	321	122	134	90	94	71	54	58	45	44	33	33	25	17
NC = non-critical group ; CI= critical illness group
