# Supplementary material for: A novel haemocytometric COVID-19 prognostic score developed and validated in an observational multicentre European hospital-based study
Source: eLife. 2020 Nov 26;9:e63195. doi: 10.7554/eLife.63195 (PMC7732342; doi:10.7554/eLife.63195)
Supplement: Figure 6—source data 1. [file elife-63195-fig6-data1.xlsx]

## Sheet: Sheet1
Figure 6_source data file 5. The number of sample measurements available per day for the trend analysis for the red blood cell related parameters plotted per patient group
	Day	0	1	2	3	4	5	6	7	8	9	10	11	12	13
HGB, NRBC	NC	469	139	146	129	95	65	59	42	31	25	18	12	11	17
	CI	321	122	134	90	94	71	54	58	45	44	33	33	25	17
RET, DELTA-He	NC	275	55	91	69	53	37	36	22	10	14	7	6	33	7
	CI	183	57	74	64	60	56	44	48	38	38	28	25	22	14
NC=non-critical group; CI= critical illness group
