# Supplementary material for: A novel haemocytometric COVID-19 prognostic score developed and validated in an observational multicentre European hospital-based study
Source: eLife. 2020 Nov 26;9:e63195. doi: 10.7554/eLife.63195 (PMC7732342; doi:10.7554/eLife.63195)
Supplement: Figure 8—source data 1. [file elife-63195-fig8-data1.xlsx]

## Sheet: Sheet1
Figure 8-source data file 4. The number of measurements for each day of hospitalisation that were available per patient group for the haemocytometric COVID-19 prognostic score prediction of clinical severity in the development cohort
Days after admission	0	1	2	3	4	5	6	7	8	9	10	11	12	13
Critical illness (CI)	182	55	74	63	60	56	44	47	38	38	28	25	22	14
Non-critical (NC)	272	54	90	69	52	36	36	22	10	14	6	6	3	7
Ward survivors (NC)	272	54	90	69	52	36	36
ICU survivors (CI)	70	25	43	36	36	35	30
Non-survivors (CI)	107	25	31	26	23	21	14
