# Supplementary material for: A novel haemocytometric COVID-19 prognostic score developed and validated in an observational multicentre European hospital-based study
Source: eLife. 2020 Nov 26;9:e63195. doi: 10.7554/eLife.63195 (PMC7732342; doi:10.7554/eLife.63195)
Supplement: Figure 11—source data 1. [file elife-63195-fig11-data1.xlsx]

## Sheet: Sheet1
Figure 11-source data file 3. The number of measurements for each day of hospitalisation that were available per patient group for the haemocytometric COVID-19 prognostic score prediction of clinical severity in the validation cohort
Days after admission	0	1	2	3	4	5	6	7	8	9	10	11	12	13
Critical illness	19	58	45	43	58	52	53	50	48	46	42	36	33	34
Non-critical	20	11	8	13	9	12	10	2	5	3	1	0	2	5
