# Supplementary material for: A novel haemocytometric COVID-19 prognostic score developed and validated in an observational multicentre European hospital-based study
Source: eLife journal article supplement (doi:10.7554/elife.63195), 2020-11-26
Supplement: supp [file elife-63195-supp-v1.zip]

Archive with 34 entries (34 files):
- elife_poa_e63195_Transparent_Reporting_File.pdf
- elife_poa_e63195_Supplementary_file_1.docx
- elife_poa_e63195_Supplementary_file_2.docx
- elife_poa_e63195_Figure_2_source_data_1.csv
- elife_poa_e63195_Figure_3_source_data_1.csv
- elife_poa_e63195_Figure_3_source_data_2.csv
- elife_poa_e63195_Figure_3_source_data_3.csv
- elife_poa_e63195_Figure_3_source_data_4.csv
- elife_poa_e63195_Figure_4_source_data_1.csv
- elife_poa_e63195_Figure_4_source_data_2.csv
- elife_poa_e63195_Figure_4_source_data_3.csv
- elife_poa_e63195_Figure_4_source_data_4.csv
- elife_poa_e63195_Figure_5_source_data_1.csv
- elife_poa_e63195_Figure_5_source_data_2.csv
- elife_poa_e63195_Figure_6_source_data_1.csv
- elife_poa_e63195_Figure_6_source_data_2.csv
- elife_poa_e63195_Figure_6_source_data_3.csv
- elife_poa_e63195_Figure_6_source_data_4.csv
- elife_poa_e63195_Figure_7_source_data_1.csv
- elife_poa_e63195_Figure_7_source_data_2.csv
- elife_poa_e63195_Figure_7_source_data_3.csv
- elife_poa_e63195_Figure_7_source_data_4.csv
- elife_poa_e63195_Figure_8_source_data_1.csv
- elife_poa_e63195_Figure_8_source_data_2.csv
- elife_poa_e63195_Figure_8_source_data_3.csv
- elife_poa_e63195_Figure_9_source_data_1.csv
- elife_poa_e63195_Figure_11_source_data_1.csv
- elife_poa_e63195_Figure_11_source_data_2.csv
- elife_poa_e63195_Table_1_source_data_1.csv
- elife_poa_e63195_Table_2_source_data_1.csv
- elife_poa_e63195_Table_4_source_data_1.csv
- elife_poa_e63195_Table_5_source_data_1.csv
- elife_poa_e63195_Table_6_source_data_1.csv
- elife_poa_e63195_Source_data_1.xlsx
