# Supplementary material for: A novel haemocytometric COVID-19 prognostic score developed and validated in an observational multicentre European hospital-based study
Source: eLife journal article supplement (doi:10.7554/elife.63195), 2020-11-26
Supplement: supp [file elife-63195-supp-v1.zip › elife_poa_e63195_Figure_2_source_data_1.csv]

Figure 2 - Source data file 1. Source data for clinical severity and outcome by age of all patients
Filename	Pat_ID	Baseline	length_of_hospitalisation	age	Mortality	Critical_or_Fatal	Riskscore complete
1	1	1	0	58	0	1	1
2	1	0	2	58	0	1	0
3	1	0	2	58	0	1	2
4	1	0	3	58	0	1	4
5	1	0	4	58	0	1	4
6	1	0	15	58	0	1	0
7	2	1	0	51	0	0	1
8	2	0	1	51	0	0	0
9	2	0	2	51	0	0	1
10	2	0	3	51	0	0	1
11	2	0	4	51	0	0	1
12	2	0	6	51	0	0	1
13	3	1	0	51	0	1	3
14	3	0	1	51	0	1	2
15	3	0	1	51	0	1	7
16	3	0	2	51	0	1	9
17	3	0	3	51	0	1	6
18	3	0	4	51	0	1	8
19	3	0	4	51	0	1	7
20	3	0	5	51	0	1	4
21	3	0	6	51	0	1	6
22	3	0	7	51	0	1	8
23	3	0	8	51	0	1	4
24	3	0	9	51	0	1	6
25	3	0	10	51	0	1	4
26	3	0	11	51	0	1	3
27	3	0	12	51	0	1	2
28	3	0	13	51	0	1	1
29	4	1	0	74	1	1	3
30	4	0	1	74	1	1	8
31	4	0	1	74	1	1	8
32	4	0	2	74	1	1	2
33	4	0	3	74	1	1	5
34	4	0	4	74	1	1	9
35	4	0	5	74	1	1	12
36	4	0	6	74	1	1	12
37	4	0	7	74	1	1	10
38	4	0	8	74	1	1	20
39	4	0	9	74	1	1	17
40	4	0	10	74	1	1	14
41	4	0	10	74	1	1	15
42	4	0	11	74	1	1	12
43	4	0	12	74	1	1	6
44	4	0	13	74	1	1	5
45	4	0	14	74	1	1	5
46	5	1	0	66	0	0	2
47	5	0	1	66	0	0	1
48	6	1	0	55	0	0	0
49	6	0	2	55	0	0	3
50	6	0	3	55	0	0	0
51	6	0	5	55	0	0	3
52	7	1	0	58	0	0	0
53	7	0	2	58	0	0	3
54	7	0	3	58	0	0	3
55	7	0	4	58	0	0	0
56	7	0	5	58	0	0	0
57	7	0	6	58	0	0	0
58	8	1	1	39	0	0
59	9	1	0	74	0	0	1
60	9	0	2	74	0	0
61	9	0	3	74	0	0	2
62	9	0	4	74	0	0	1
63	9	0	5	74	0	0	2
64	9	0	7	74	0	0	1
65	10	1	0	73	0	1	4
66	10	0	1	73	0	1	3
67	10	0	3	73	0	1	5
68	10	0	4	73	0	1	11
69	11	1	0	64	0	0	1
70	11	0	1	64	0	0	2
71	11	0	3	64	0	0	0
72	12	1	0	62	1	1	3
73	12	0	2	62	1	1	4
74	13	1	5	42	1	1
75	13	0	6	42	1	1	8
76	13	0	7	42	1	1	9
77	13	0	8	42	1	1	12
78	13	0	9	42	1	1	12
79	13	0	9	42	1	1	12
80	13	0	10	42	1	1	11
81	13	0	11	42	1	1	8
82	13	0	12	42	1	1	8
83	13	0	13	42	1	1	8
84	14	1	1	34	0	0
85	15	1	13	63	0	1
86	15	0	14	63	0	1	2
87	15	0	15	63	0	1	2
88	15	0	16	63	0	1	1
89	15	0	17	63	0	1	1
90	15	0	18	63	0	1	1
91	15	0	19	63	0	1	1
92	15	0	20	63	0	1	0
93	16	1	11	80	0	1
94	16	0	12	80	0	1	8
95	16	0	13	80	0	1	10
96	16	0	14	80	0	1	6
97	16	0	15	80	0	1	3
98	16	0	16	80	0	1	7
99	16	0	17	80	0	1	13
100	16	0	18	80	0	1	7
101	16	0	19	80	0	1	8
102	17	1	1	68	0	0
103	17	0	2	68	0	0	0
104	17	0	4	68	0	0	0
105	18	1	0	78	0	1	7
106	18	0	2	78	0	1	3
107	18	0	2	78	0	1	7
108	18	0	3	78	0	1	7
109	18	0	4	78	0	1	9
110	19	1	0	88	0	1	1
111	19	0	1	88	0	1	0
112	19	0	3	88	0	1	1
113	20	1	0	58	0	0	0
114	20	0	1	58	0	0	3
115	20	0	3	58	0	0	0
116	21	1	0	67	0	1
117	22	1	0	63	0	0
118	23	1	0	69	0	0
119	24	1	0	62	0	0
120	25	1	0	81	1	1
121	26	1	0	60	0	0
122	27	1	0	70	0	0
123	28	1	0	58	0	0
124	29	1	0	49	0	0
125	30	1	0	67	1	1
126	30	0	4	67	1	1
127	31	1	0	62	0	0
128	32	1	0	80	1	1
129	33	1	0	78	1	1
130	34	1	0	71	1	1
131	35	1	0	47	0	0
132	36	1	0	52	0	1	2
133	37	1	0	73	0	0
134	38	1	0	74	1	1
135	39	1	0	58	0	0
136	40	1	0	74	0	0
137	41	1	0	72	0	0
138	42	1	0	35	0	0
139	43	1	0	75	0	0
140	44	1	0	91	0	0
141	45	1	0	68	0	1
142	45	0	1	68	0	1
143	45	0	1	68	0	1
144	45	0	2	68	0	1
145	45	0	3	68	0	1
146	45	0	4	68	0	1
147	45	0	5	68	0	1
148	45	0	5	68	0	1
149	45	0	6	68	0	1
150	45	0	6	68	0	1
151	45	0	7	68	0	1
152	45	0	7	68	0	1
153	45	0	8	68	0	1
154	45	0	9	68	0	1
155	45	0	10	68	0	1
156	45	0	11	68	0	1
157	45	0	12	68	0	1
158	45	0	13	68	0	1
159	45	0	14	68	0	1
160	45	0	15	68	0	1
161	45	0	16	68	0	1
162	45	0	17	68	0	1
163	45	0	18	68	0	1
164	45	0	19	68	0	1
165	45	0	20	68	0	1
166	45	0	21	68	0	1
167	45	0	22	68	0	1
168	46	1	0	75	0	0
169	47	1	0	73	0	0
170	48	1	0	74	1	1
171	49	1	0	82	1	1
172	50	1	0	75	0	0
173	51	1	0	63	0	0
174	52	1	0	74	1	1
175	53	1	0	64	0	1
176	54	1	0	83	1	1
177	54	0	4	83	1	1
178	54	0	10	83	1	1
179	54	0	11	83	1	1
180	55	1	0	70	0	0
181	56	1	0	67	0	1
182	57	1	0	71	0	0
183	58	1	0	81	0	0
184	59	1	0	66	0	0
185	60	1	0	82	0	0
186	61	1	0	87	0	0
187	62	1	0	83	1	1
188	63	1	0	68	0	0
189	64	1	0	25	0	0
190	65	1	0	65	0	0
191	66	1	0	73	1	1
192	67	1	0	58	0	0
193	68	1	0	73	0	0
194	69	1	0	69	0	0
195	70	1	0	57	0	0
196	71	1	0	77	0	0
197	72	1	0	60	0	0
198	73	1	0	36	0	0
199	74	1	0	72	0	0
200	75	1	0	58	0	0
201	76	1	0	42	0	0
202	77	1	0	90	0	0
203	78	1	0	77	1	1
204	79	1	0	52	0	0
205	79	0	0	52	0	0
206	79	0	1	52	0	0
207	79	0	2	52	0	0
208	79	0	3	52	0	0
209	79	0	5	52	0	0
210	79	0	7	52	0	0
211	79	0	8	52	0	0
212	79	0	9	52	0	0
213	79	0	10	52	0	0
214	79	0	12	52	0	0
215	80	1	0	59	0	0
216	81	1	0	73	1	1
217	82	1	0	57	0	0
218	83	1	0	37	0	0
220	85	1	0	32	0	1
221	86	1	0	86	1	1
222	87	1	0	55	0	0
223	88	1	0	62	0	0
225	90	1	0	92	0	0
226	91	1	0	54	0	0
227	92	1	0	68	0	0
228	93	1	0	71	1	1
229	93	0	1	71	1	1
230	93	0	2	71	1	1
231	94	1	0	66	0	0
232	95	1	0	82	0	0
233	96	1	0	89	1	1
234	97	1	0	62	0	0
235	98	1	0	78	0	0
236	98	0	2	78	0	0
237	98	0	4	78	0	0
238	98	0	5	78	0	0
239	98	0	13	78	0	0
240	99	1	0	83	1	1
241	99	0	1	83	1	1
242	99	0	2	83	1	1
243	99	0	3	83	1	1
244	99	0	4	83	1	1
245	99	0	5	83	1	1
246	100	1	0	80	1	1
247	101	1	0	87	1	1
248	102	1	0	58	0	0
249	103	1	0	67	1	1
250	103	0	1	67	1	1
251	104	1	0	72	0	1
252	105	1	0	39	0	0
253	106	1	0	85	1	1
254	107	1	0	40	0	0
255	108	1	0	69	0	0
256	109	1	0	71	1	1
257	110	1	0	57	0	0
258	110	0	1	57	0	0
259	110	0	2	57	0	0
260	110	0	3	57	0	0
261	110	0	4	57	0	0
262	110	0	5	57	0	0
263	110	0	6	57	0	0
264	110	0	7	57	0	0
265	110	0	7	57	0	0
266	110	0	8	57	0	0
267	110	0	9	57	0	0
268	110	0	10	57	0	0
269	110	0	11	57	0	0
270	110	0	12	57	0	0
271	110	0	13	57	0	0
272	110	0	16	57	0	0
273	110	0	17	57	0	0
274	110	0	20	57	0	0
275	111	1	0	75	0	0
276	112	1	0	52	0	0
277	113	1	0	56	0	0
278	114	1	0	73	1	1
279	115	1	0	57	1	1
280	116	1	0	84	1	1
281	117	1	0	57	0	0
282	118	1	0	89	1	1
283	119	1	0	86	1	1
284	120	1	0	68	1	1
285	121	1	0	69	0	1
286	122	1	0	49	0	0
287	122	0	4	49	0	0
288	122	0	7	49	0	0
289	122	0	9	49	0	0
290	123	1	0	82	1	1
291	124	1	0	68	0	0
292	125	1	0	63	0	0
293	126	1	0	81	1	1
294	126	0	2	81	1	1
295	127	1	0	52	0	0
296	127	0	4	52	0	0
297	128	1	0	78	1	1
298	129	1	0	84	0	0
299	130	1	0	73	1	1
300	131	1	0	90	1	1
301	132	1	0	84	1	1
302	133	1	0	62	1	1
303	134	1	0	80	1	1
304	134	0	2	80	1	1
305	134	0	3	80	1	1
306	135	1	0	66	0	0
307	136	1	0	61	0	0
308	136	0	5	61	0	0
309	136	0	7	61	0	0
310	136	0	8	61	0	0
311	136	0	9	61	0	0
312	136	0	10	61	0	0
313	136	0	11	61	0	0
314	136	0	12	61	0	0
315	136	0	13	61	0	0
316	136	0	14	61	0	0
317	137	1	0	82	1	1
318	137	0	1	82	1	1
319	137	0	2	82	1	1
320	137	0	4	82	1	1
321	138	1	0	67	0	0
322	139	1	0	69	0	0
323	140	1	0	47	0	0
324	140	0	2	47	0	0
325	140	0	6	47	0	0
326	141	1	0	47	0	0
327	142	1	0	71	0	1
328	143	1	0	74	1	1
329	144	1	0	36	0	0
330	145	1	0	49	0	0
331	146	1	0	54	0	0
332	147	1	0	89	1	1
333	148	1	0	77	1	1
334	149	1	0	76	0	0
335	150	1	0	56	0	1
336	151	1	0	64	0	1
337	152	1	0	66	0	0
338	153	1	0	96	0	0
339	154	1	0	60	0	0
340	155	1	0	84	0	0
341	156	1	0	72	0	0
342	157	1	0	81	1	1
343	158	1	0	54	0	0
344	159	1	0	71	0	0
345	160	1	0	37	0	0
346	161	1	0	81	1	1
347	162	1	0	90	1	1
348	163	1	0	50	0	0
349	164	1	0	68	1	1
350	165	1	0	56	0	1
351	166	1	0	74	1	1
352	167	1	0	55	0	0
353	168	1	0	59	0	0
355	170	1	0	81	0	0
356	171	1	0	73	0	0
357	172	1	0	87	0	0
358	173	1	0	57	1	1
359	174	1	0	65	0	0
360	175	1	0	91	1	1
361	176	1	0	67	0	0
362	177	1	0	64	0	0
363	178	1	0	67	1	1
364	179	1	0	75	0	0
365	179	0	2	75	0	0
366	179	0	3	75	0	0
367	179	0	5	75	0	0
368	179	0	6	75	0	0
369	179	0	6	75	0	0
370	179	0	7	75	0	0
371	179	0	8	75	0	0
372	179	0	9	75	0	0
373	179	0	10	75	0	0
374	179	0	11	75	0	0
375	179	0	12	75	0	0
376	179	0	13	75	0	0
377	179	0	14	75	0	0
378	179	0	15	75	0	0
379	179	0	16	75	0	0
380	180	1	0	67	1	1
381	181	1	0	36	0	0
382	182	1	0	67	0	0
383	183	1	0	53	0	0
384	184	1	0	74	0	0
385	185	1	0	70	0	0
386	186	1	0	76	1	1
387	187	1	0	78	0	0
388	188	1	0	70	1	1
389	189	1	0	93	1	1
390	189	0	2	93	1	1
391	189	0	4	93	1	1
392	190	1	0	50	0	0
393	191	1	0	85	0	0
394	192	1	0	74	0	0
395	193	1	0	53	0	0
396	194	1	0	84	1	1
397	195	1	0	58	0	0
398	196	1	0	91	1	1
399	197	1	0	54	0	0
400	198	1	0	58	0	0
401	199	1	0	77	0	1
402	200	1	0	72	1	1
403	201	1	0	61	0	1
404	202	1	0	76	1	1
405	203	1	0	43	0	1
406	204	1	0	69	0	0
407	205	1	0	57	0	0
408	206	1	0	48	0	0
409	207	1	0	62	0	0
410	208	1	0	95	1	1
411	209	1	0	45	0	0
412	210	1	0	66	1	1
413	211	1	0	77	0	0
414	212	1	0	67	0	1	2
415	213	1	0	72	1	1
416	214	1	0	81	1	1
417	215	1	0	76	1	1
418	216	1	0	64	0	0
419	216	0	2	64	0	0
420	216	0	3	64	0	0
421	216	0	4	64	0	0
422	216	0	6	64	0	0
423	216	0	7	64	0	0
424	216	0	9	64	0	0
425	217	1	0	91	1	1
426	217	0	3	91	1	1
427	217	0	5	91	1	1
428	217	0	7	91	1	1
429	218	1	0	83	0	0
430	219	1	0	64	0	0
431	220	1	0	68	1	1
432	221	1	0	76	0	0
433	222	1	0	83	0	0
434	223	1	0	86	1	1
435	224	1	0	77	1	1
436	225	1	0	58	0	1
437	226	1	0	67	0	0
438	227	1	0	74	0	0
439	228	1	0	35	0	0
440	229	1	0	48	0	0
441	230	1	0	44	0	0
442	231	1	0	83	1	1
443	232	1	0	66	0	0
444	233	1	0	53	0	0	0
445	234	1	0	76	0	0
446	235	1	0	76	0	0
447	236	1	0	57	0	0
448	237	1	1	79	1	1	15
449	237	0	1	79	1	1	15
450	237	0	1	79	1	1	15
451	237	0	2	79	1	1	15
452	237	0	3	79	1	1	16
453	237	0	4	79	1	1	16
454	237	0	5	79	1	1	15
455	238	1	11	45	0	1	11
456	238	0	12	45	0	1	7
457	238	0	13	45	0	1	6
458	238	0	14	45	0	1	6
459	238	0	15	45	0	1	9
460	238	0	16	45	0	1	7
461	239	1	0	53	0	0	4
462	240	1	1	62	0	0	2
463	240	0	3	62	0	0	8
464	240	0	4	62	0	0	7
465	241	1	0	68	0	1	10
466	241	0	0	68	0	1
467	241	0	1	68	0	1
468	241	0	2	68	0	1	9
469	241	0	2	68	0	1	10
470	241	0	3	68	0	1	10
471	241	0	4	68	0	1	11
472	241	0	5	68	0	1	6
473	241	0	5	68	0	1	4
474	241	0	6	68	0	1	6
475	242	1	0	75	0	1	9
476	242	0	1	75	0	1	11
477	242	0	1	75	0	1	11
478	242	0	1	75	0	1	6
479	242	0	2	75	0	1	7
480	242	0	2	75	0	1	7
481	243	1	8	61	0	1	6
482	243	0	9	61	0	1	8
483	243	0	9	61	0	1	10
484	243	0	10	61	0	1	11
485	243	0	11	61	0	1	11
486	244	1	2	60	0	0	1
487	244	0	6	60	0	0	0
488	245	1	2	58	0	1	13
489	246	1	0	67	0	0	4
490	246	0	2	67	0	0	4
491	247	1	2	76	0	0	6
492	247	0	4	76	0	0	6
493	247	0	5	76	0	0	6
494	247	0	6	76	0	0	6
495	248	1	1	53	0	0	1
496	248	0	2	53	0	0	1
497	248	0	3	53	0	0	1
498	248	0	4	53	0	0	2
499	249	1	2	56	0	1	16
500	249	0	3	56	0	1	11
501	249	0	3	56	0	1	14
502	249	0	4	56	0	1	13
503	249	0	4	56	0	1	13
504	249	0	4	56	0	1	12
505	249	0	5	56	0	1	13
506	249	0	6	56	0	1	10
507	249	0	7	56	0	1	12
508	250	1	2	71	0	0	2
509	250	0	5	71	0	0	2
510	250	0	6	71	0	0	3
511	251	1	2	66	0	0	2
512	251	0	3	66	0	0	2
513	251	0	5	66	0	0	1
514	252	1	7	48	1	1	0
515	252	0	8	48	1	1	1
516	252	0	9	48	1	1	1
517	252	0	10	48	1	1	0
518	252	0	11	48	1	1	0
519	252	0	12	48	1	1	3
520	253	1	6	71	1	1	7
521	253	0	7	71	1	1	5
522	253	0	7	71	1	1	6
523	253	0	7	71	1	1	6
524	253	0	7	71	1	1	10
525	253	0	8	71	1	1	6
526	253	0	9	71	1	1	7
527	254	1	6	73	1	1	14
528	255	1	6	67	0	0	9
529	255	0	7	67	0	0	7
530	255	0	8	67	0	0	3
531	255	0	9	67	0	0	2
532	255	0	10	67	0	0	1
533	256	1	1	68	0	0	8
534	256	0	2	68	0	0	7
535	257	1	1	78	1	1	6
536	257	0	3	78	1	1	5
537	257	0	4	78	1	1	9
538	257	0	5	78	1	1	12
539	258	1	2	52	0	0	1
540	258	0	3	52	0	0	0
541	259	1	7	74	0	0	2
542	259	0	8	74	0	0	3
543	260	1	0	79	1	1	4
544	260	0	2	79	1	1	5
545	260	0	4	79	1	1	6
546	260	0	5	79	1	1	6
547	260	0	6	79	1	1	6
548	261	1	6	43	0	1	7
549	261	0	7	43	0	1	13
550	261	0	8	43	0	1	9
551	261	0	9	43	0	1	10
552	261	0	11	43	0	1	8
553	261	0	12	43	0	1	5
554	261	0	12	43	0	1	8
555	262	1	2	74	0	0	5
556	262	0	4	74	0	0	4
557	262	0	5	74	0	0	4
558	262	0	6	74	0	0	2
559	262	0	7	74	0	0	8
560	263	1	7	77	0	0	2
561	263	0	11	77	0	0	1
562	263	0	12	77	0	0	0
563	264	1	3	69	0	0	0
564	264	0	4	69	0	0	0
565	264	0	5	69	0	0	0
566	264	0	7	69	0	0	0
567	265	1	0	55	0	1	1
568	265	0	1	55	0	1	3
569	265	0	2	55	0	1	1
570	266	1	0	57	0	1
571	266	0	4	57	0	1	11
572	266	0	5	57	0	1	13
573	266	0	6	57	0	1	12
574	266	0	7	57	0	1	14
575	267	1	0	66	0	0	0
576	267	0	2	66	0	0	0
577	268	1	2	54	0	1	7
578	268	0	2	54	0	1	8
579	268	0	3	54	0	1	7
580	268	0	3	54	0	1	9
581	269	1	4	51	0	0	0
582	270	1	3	79	1	1	15
583	270	0	4	79	1	1	11
584	270	0	5	79	1	1	16
585	271	1	7	75	1	1	12
586	271	0	8	75	1	1	13
587	271	0	9	75	1	1	14
588	271	0	9	75	1	1	7
589	272	1	0	70	0	0	2
590	272	0	2	70	0	0	6
591	272	0	5	70	0	0	4
592	273	1	0	83	0	0
593	274	1	1	54	0	0	1
594	274	0	3	54	0	0	5
595	274	0	4	54	0	0	4
596	275	1	2	86	1	1	6
597	275	0	3	86	1	1	5
598	275	0	4	86	1	1	6
599	275	0	5	86	1	1	8
600	275	0	6	86	1	1	11
601	275	0	7	86	1	1	10
602	276	1	6	53	0	0	1
603	276	0	8	53	0	0	2
604	276	0	9	53	0	0	1
605	277	1	2	62	0	0	2
606	277	0	4	62	0	0	2
607	277	0	6	62	0	0	2
608	277	0	7	62	0	0	1
609	278	1	2	69	0	0	2
610	278	0	3	69	0	0	3
611	278	0	4	69	0	0	2
612	279	1	0	77	0	0
613	279	0	2	77	0	0
614	279	0	6	77	0	0	7
615	279	0	9	77	0	0	10
616	280	1	0	72	0	0	2
617	281	1	16	77	0	1	10
618	282	1	5	87	0	0	1
619	283	1	1	66	0	1	2
620	284	1	4	82	0	0	2
621	284	0	5	82	0	0	2
622	284	0	6	82	0	0	2
623	284	0	7	82	0	0	2
624	285	1	1	78	0	0	3
625	285	0	3	78	0	0	2
626	285	0	4	78	0	0	1
627	286	1	0	69	0	0	0
628	286	0	2	69	0	0	2
629	286	0	3	69	0	0	0
630	286	0	5	69	0	0	0
631	287	1	4	77	0	0	3
632	287	0	6	77	0	0	0
633	288	1	7	66	0	1	11
634	288	0	8	66	0	1	14
635	288	0	8	66	0	1	15
636	288	0	9	66	0	1	13
637	288	0	9	66	0	1	12
638	288	0	9	66	0	1	12
639	288	0	9	66	0	1	12
640	288	0	10	66	0	1	8
641	288	0	11	66	0	1	10
642	288	0	11	66	0	1	7
643	288	0	11	66	0	1	11
644	289	1	2	75	0	0	6
645	290	1	2	84	0	0	17
646	290	0	4	84	0	0	9
647	290	0	6	84	0	0	11
648	291	1	2	87	0	0	4
649	291	0	4	87	0	0	5
650	291	0	6	87	0	0	4
651	292	1	3	59	0	1	0
652	292	0	4	59	0	1	3
653	292	0	5	59	0	1	0
654	293	1	15	69	0	0	14
655	293	0	17	69	0	0	8
656	294	1	4	69	0	0	4
657	294	0	6	69	0	0	4
658	294	0	7	69	0	0	7
659	295	1	25	82	1	1	13
660	296	1	3	74	0	0	2
661	296	0	4	74	0	0	1
662	297	1	2	55	0	0	2
663	297	0	4	55	0	0	0
664	298	1	0	30	0	0	0
665	298	0	2	30	0	0	0
666	298	0	3	30	0	0	0
667	298	0	4	30	0	0	1
668	298	0	5	30	0	0	0
669	299	1	3	58	0	0	8
670	299	0	5	58	0	0	3
671	299	0	7	58	0	0	5
672	300	1	2	55	0	0	8
673	300	0	3	55	0	0	7
674	300	0	4	55	0	0	6
675	300	0	6	55	0	0	4
676	301	1	0	86	0	0
677	301	0	9	86	0	0	0
678	301	0	12	86	0	0	0
679	302	1	2	93	0	0	1
680	302	0	3	93	0	0	0
681	302	0	4	93	0	0	2
682	303	1	2	74	0	0	4
683	304	1	2	73	0	0	8
684	305	1	3	73	0	0
685	305	0	4	73	0	0	3
686	306	1	1	57	0	0	3
687	307	1	1	84	1	1
688	307	0	3	84	1	1	7
689	307	0	4	84	1	1	6
690	308	1	1	81	1	1	2
691	308	0	2	81	1	1	6
692	309	1	1	87	1	1
693	309	0	2	87	1	1	6
694	309	0	3	87	1	1
695	309	0	3	87	1	1	8
696	309	0	4	87	1	1	7
697	310	1	1	57	0	0
698	310	0	3	57	0	0	3
699	310	0	4	57	0	0	2
700	311	1	2	86	0	0	4
701	311	0	3	86	0	0	5
702	311	0	4	86	0	0	2
703	312	1	2	76	0	0	9
704	312	0	3	76	0	0	4
705	313	1	2	41	0	0	2
706	313	0	3	41	0	0	1
707	313	0	4	41	0	0	3
708	314	1	2	52	0	0	0
709	314	0	3	52	0	0	0
710	314	0	4	52	0	0	0
711	315	1	2	65	0	1	9
712	316	1	2	70	0	0	1
715	318	1	1	72	0	0	2
716	318	0	2	72	0	0
717	318	0	4	72	0	0	5
718	318	0	7	72	0	0	6
719	318	0	9	72	0	0
720	319	1	2	65	0	1	13
721	319	0	3	65	0	1	13
722	319	0	4	65	0	1	15
723	319	0	5	65	0	1	14
724	319	0	6	65	0	1	12
725	319	0	9	65	0	1	10
726	319	0	10	65	0	1	9
727	319	0	11	65	0	1	7
728	319	0	12	65	0	1	2
729	319	0	13	65	0	1	9
730	320	1	0	63	0	1	10
731	321	1	0	48	0	0	5
732	321	0	3	48	0	0	5
733	322	1	0	76	0	0	1
734	322	0	1	76	0	0	0
735	323	1	0	48	0	0	0
736	323	0	4	48	0	0	2
737	324	1	3	68	0	0	1
738	325	1	2	51	0	0	3
739	326	1	0	73	1	1	15
740	326	0	1	73	1	1	10
741	326	0	2	73	1	1	16
742	326	0	3	73	1	1	14
743	326	0	4	73	1	1	12
744	327	1	1	78	0	0	2
745	328	1	2	75	1	1
746	328	0	3	75	1	1	18
747	329	1	0	55	0	0	9
748	329	0	1	55	0	0	8
749	329	0	2	55	0	0	7
750	329	0	3	55	0	0	6
751	330	1	0	48	0	0	3
752	331	1	8	78	1	1	20
753	331	0	9	78	1	1	14
754	331	0	10	78	1	1	14
755	331	0	11	78	1	1	13
756	331	0	14	78	1	1	13
757	331	0	15	78	1	1	11
758	331	0	16	78	1	1	7
759	331	0	17	78	1	1	3
760	331	0	18	78	1	1	3
761	332	1	0	61	1	1	2
762	332	0	0	61	1	1	7
763	333	1	5	28	0	1	8
764	333	0	6	28	0	1	7
765	333	0	7	28	0	1	8
766	334	1	2	64	0	0	3
767	334	0	3	64	0	0
768	335	1	10	69	0	1	1
769	335	0	11	69	0	1	0
770	335	0	12	69	0	1	1
771	335	0	13	69	0	1	1
772	335	0	14	69	0	1	0
773	335	0	19	69	0	1	0
774	335	0	20	69	0	1	0
775	335	0	21	69	0	1	0
776	336	1	1	89	1	1	0
777	337	1	0	81	0	0	4
778	338	1	3	79	0	0	0
779	339	1	0	48	0	0	0
780	340	1	0	35	0	0	0
781	341	1	9	74	1	1	11
782	341	0	12	74	1	1	11
783	341	0	13	74	1	1	8
784	341	0	14	74	1	1	8
785	341	0	15	74	1	1	10
786	341	0	16	74	1	1	8
787	341	0	21	74	1	1	13
788	341	0	22	74	1	1	12
789	341	0	23	74	1	1	11
790	342	1	0	76	0	0	3
791	343	1	3	68	0	0	4
792	344	1	0	68	0	0	5
793	345	1	2	79	1	1	6
794	346	1	0	72	0	0	0
795	346	0	3	72	0	0	6
796	347	1	10	74	0	0	4
797	347	0	11	74	0	0	0
798	348	1	3	78	1	1	8
799	348	0	6	78	1	1	7
800	349	1	4	49	0	1	6
801	349	0	4	49	0	1	9
802	349	0	5	49	0	1	3
803	349	0	6	49	0	1	8
804	349	0	7	49	0	1	5
805	349	0	12	49	0	1	1
806	349	0	13	49	0	1	1
807	349	0	14	49	0	1	1
808	349	0	15	49	0	1	0
809	350	1	5	56	0	1	3
810	350	0	8	56	0	1	2
811	350	0	9	56	0	1	5
812	350	0	10	56	0	1	6
813	350	0	11	56	0	1	6
814	350	0	12	56	0	1	5
815	350	0	17	56	0	1	0
816	350	0	18	56	0	1	0
817	350	0	19	56	0	1	0
818	351	1	5	45	0	0	0
819	352	1	0	71	0	0	0
820	352	0	2	71	0	0	0
821	353	1	2	52	0	1	11
822	353	0	3	52	0	1	8
823	353	0	4	52	0	1	10
824	354	1	3	72	0	0	0
825	355	1	1	51	0	1	3
826	355	0	5	51	0	1	8
827	355	0	6	51	0	1	12
828	355	0	7	51	0	1	12
829	355	0	8	51	0	1	14
830	355	0	11	51	0	1	12
831	355	0	12	51	0	1	15
832	355	0	13	51	0	1	10
833	355	0	14	51	0	1	9
834	355	0	15	51	0	1	8
835	356	1	2	55	0	1	1
836	356	0	5	55	0	1	1
837	356	0	6	55	0	1	1
838	356	0	7	55	0	1	8
839	356	0	8	55	0	1	9
840	356	0	9	55	0	1	8
841	356	0	12	55	0	1	4
842	356	0	13	55	0	1	5
843	356	0	14	55	0	1	2
844	356	0	15	55	0	1	5
845	356	0	16	55	0	1	2
846	357	1	0	64	0	0	2
847	358	1	0	31	0	0	0
848	359	1	1	85	0	0	2
849	359	0	3	85	0	0	2
850	359	0	9	85	0	0	2
851	360	1	1	64	0	1	1
852	360	0	2	64	0	1	1
853	360	0	3	64	0	1	2
854	360	0	4	64	0	1	1
855	360	0	7	64	0	1	5
856	360	0	8	64	0	1	5
857	360	0	9	64	0	1	11
858	360	0	10	64	0	1	4
859	360	0	10	64	0	1	4
860	360	0	11	64	0	1	4
861	361	1	1	52	0	1	3
862	361	0	2	52	0	1	11
863	361	0	9	52	0	1	10
864	361	0	10	52	0	1	5
865	361	0	11	52	0	1	5
866	362	1	0	43	0	0	0
867	363	1	2	75	0	0	6
868	364	1	4	57	0	0	3
869	364	0	6	57	0	0	0
870	365	1	0	53	0	0	2
871	365	0	5	53	0	0	3
872	365	0	6	53	0	0	7
873	365	0	7	53	0	0	7
874	365	0	8	53	0	0	7
875	365	0	9	53	0	0	3
876	366	1	3	51	0	0	1
877	367	1	0	55	0	0	1
878	367	0	2	55	0	0	3
879	368	1	10	53	0	1	1
880	369	1	3	58	0	0	3
881	369	0	5	58	0	0	1
882	369	0	8	58	0	0	1
883	370	1	0	65	0	0	1
884	371	1	0	56	0	0	0
885	372	1	5	73	0	0	4
886	373	1	0	73	0	0	3
887	374	1	0	40	0	0	5
888	375	1	0	73	0	0	1
889	375	0	2	73	0	0	2
890	375	0	6	73	0	0	6
891	376	1	0	54	0	0	0
892	376	0	0	54	0	0	1
893	377	1	0	50	0	1	6
894	377	0	1	50	0	1	7
895	377	0	2	50	0	1	15
896	377	0	5	50	0	1	8
897	377	0	6	50	0	1	8
898	377	0	7	50	0	1	7
899	377	0	8	50	0	1	8
900	377	0	9	50	0	1	8
901	378	1	0	60	0	1	5
902	378	0	2	60	0	1	8
903	378	0	3	60	0	1	12
904	378	0	6	60	0	1	16
905	378	0	7	60	0	1	18
906	378	0	8	60	0	1	17
907	378	0	9	60	0	1	16
908	378	0	10	60	0	1	15
909	379	1	0	49	0	0	0
910	380	1	0	51	0	0	0
911	381	1	2	55	0	0	2
912	382	1	2	74	1	1	4
913	383	1	4	70	0	0	11
914	384	1	1	64	0	1	12
915	384	0	2	64	0	1	16
916	384	0	5	64	0	1	12
917	384	0	6	64	0	1	12
918	384	0	7	64	0	1	3
919	384	0	8	64	0	1	8
920	384	0	8	64	0	1	8
921	385	1	1	64	1	1	3
922	386	1	0	71	0	0	1
923	386	0	1	71	0	0	2
924	387	1	4	77	0	0	5
925	388	1	1	69	0	0	2
926	389	1	2	76	0	0	5
927	389	0	6	76	0	0	4
928	390	1	2	80	0	0	10
929	390	0	6	80	0	0	3
930	390	0	10	80	0	0	5
931	391	1	0	84	1	1	13
932	392	1	2	85	1	1	6
933	392	0	5	85	1	1	5
934	393	1	5	83	0	0	1
935	394	1	2	51	0	0	0
936	395	1	2	67	0	0	2
937	396	1	2	70	0	0	0
938	397	1	2	79	0	0	1
939	397	0	5	79	0	0	0
940	398	1	6	63	0	0	6
941	399	1	2	72	0	0	4
942	400	1	0	87	0	0	1
943	400	0	1	87	0	0	1
944	400	0	4	87	0	0	5
945	401	1	4	53	0	1	9
946	401	0	5	53	0	1	5
947	401	0	6	53	0	1	6
948	401	0	7	53	0	1	3
949	401	0	8	53	0	1	4
950	402	1	3	85	0	0	7
951	403	1	2	77	0	0	4
952	404	1	2	71	0	0	4
953	405	1	2	55	0	1	0
954	405	0	5	55	0	1	5
955	405	0	5	55	0	1	3
956	405	0	6	55	0	1	5
957	406	1	0	71	1	1	4
958	406	0	2	71	1	1	10
959	406	0	3	71	1	1	8
960	406	0	4	71	1	1	3
961	407	1	2	75	0	0	1
962	407	0	6	75	0	0	10
963	407	0	7	75	0	0	11
964	407	0	9	75	0	0	16
965	407	0	13	75	0	0	12
966	408	1	0	73	0	0	0
967	408	0	3	73	0	0	2
968	409	1	2	75	0	0	7
969	409	0	5	75	0	0	8
970	410	1	0	74	0	0	3
971	410	0	2	74	0	0
972	411	1	0	62	0	0	1
973	412	1	2	63	0	1	1
974	412	0	5	63	0	1	3
975	412	0	6	63	0	1	11
976	413	1	0	68	0	1	1
977	413	0	3	68	0	1	8
978	413	0	4	68	0	1	8
979	413	0	5	68	0	1	6
980	413	0	6	68	0	1	9
981	413	0	7	68	0	1	6
982	414	1	1	78	0	0
983	415	1	1	72	0	0	1
984	416	1	0	72	0	0	4
985	416	0	1	72	0	0
986	417	1	0	66	0	0	1
987	417	0	1	66	0	0
988	417	0	2	66	0	0
989	417	0	4	66	0	0
990	417	0	7	66	0	0
991	417	0	9	66	0	0
992	418	1	13	75	0	0
993	418	0	14	75	0	0
994	418	0	17	75	0	0
995	418	0	18	75	0	0
996	418	0	19	75	0	0
997	418	0	21	75	0	0
998	418	0	24	75	0	0
999	418	0	26	75	0	0
1000	419	1	0	76	0	0
1001	419	0	2	76	0	0
1002	419	0	3	76	0	0
1003	420	1	0	71	1	1
1004	420	0	1	71	1	1
1005	421	1	0	85	1	1
1006	421	0	0	85	1	1
1007	422	1	0	87	1	1	8
1008	422	0	1	87	1	1
1009	422	0	2	87	1	1
1010	423	1	0	79	1	1	7
1011	423	0	2	79	1	1
1012	423	0	4	79	1	1
1013	424	1	0	75	0	0	2
1014	424	0	1	75	0	0
1015	424	0	5	75	0	0
1016	424	0	7	75	0	0
1017	425	1	12	67	1	1
1018	426	1	0	84	1	1
1019	427	1	0	53	0	1	7
1020	427	0	1	53	0	1
1021	428	1	0	48	0	0
1022	428	0	3	48	0	0
1023	428	0	4	48	0	0
1024	428	0	6	48	0	0
1025	429	1	0	77	1	1	0
1026	429	0	1	77	1	1
1027	429	0	2	77	1	1
1028	429	0	5	77	1	1
1029	429	0	8	77	1	1
1030	429	0	11	77	1	1
1031	430	1	1	73	1	1
1032	431	1	0	58	0	0	0
1033	432	1	0	71	0	0
1034	432	0	1	71	0	0
1035	432	0	3	71	0	0	5
1036	433	1	0	54	0	0	0
1037	433	0	1	54	0	0
1038	433	0	2	54	0	0
1039	434	1	0	71	0	0	10
1040	434	0	1	71	0	0
1041	434	0	3	71	0	0
1042	434	0	5	71	0	0
1043	434	0	7	71	0	0
1044	435	1	8	74	0	0
1045	435	0	11	74	0	0
1046	436	1	0	57	1	1	1
1047	437	1	0	64	0	1	5
1048	437	0	2	64	0	1
1049	438	1	0	74	0	0	1
1050	438	0	2	74	0	0
1051	438	0	4	74	0	0
1052	439	1	0	82	1	1	6
1053	439	0	2	82	1	1
1054	440	1	2	74	0	0	0
1055	441	1	0	89	0	0	3
1056	441	0	1	89	0	0
1057	441	0	3	89	0	0
1058	442	1	0	74	1	1
1059	442	0	1	74	1	1
1060	442	0	2	74	1	1
1061	442	0	3	74	1	1
1062	442	0	6	74	1	1
1063	443	1	0	57	0	1	4
1064	443	0	2	57	0	1
1065	443	0	4	57	0	1
1066	443	0	5	57	0	1
1067	444	1	0	54	0	1	7
1068	444	0	1	54	0	1
1069	445	1	0	81	0	0
1070	445	0	1	81	0	0
1071	445	0	6	81	0	0
1072	445	0	8	81	0	0
1073	445	0	10	81	0	0
1074	445	0	13	81	0	0
1075	446	1	2	81	1	1
1076	446	0	6	81	1	1
1077	446	0	8	81	1	1
1078	446	0	11	81	1	1
1079	446	0	18	81	1	1
1080	446	0	20	81	1	1
1081	447	1	1	86	0	0
1082	447	0	3	86	0	0
1083	447	0	6	86	0	0
1084	447	0	8	86	0	0
1085	447	0	10	86	0	0
1086	447	0	13	86	0	0
1087	448	1	0	55	0	0	4
1088	448	0	2	55	0	0
1089	449	1	0	52	0	0	2
1090	449	0	1	52	0	0
1091	449	0	4	52	0	0
1092	449	0	6	52	0	0
1093	449	0	8	52	0	0
1094	450	1	0	83	0	0	12
1095	450	0	2	83	0	0
1096	450	0	3	83	0	0
1097	450	0	5	83	0	0
1098	451	1	0	75	0	0
1099	452	1	0	43	1	1
1100	453	1	0	78	1	1	1
1101	453	0	4	78	1	1
1102	453	0	6	78	1	1
1103	453	0	8	78	1	1
1104	454	1	7	63	0	0
1105	454	0	10	63	0	0
1106	455	1	0	56	1	1	4
1107	455	0	2	56	1	1
1108	455	0	4	56	1	1
1109	456	1	0	85	0	0
1110	456	0	4	85	0	0
1111	457	1	1	64	0	0
1112	457	0	3	64	0	0
1113	457	0	5	64	0	0
1114	457	0	8	64	0	0
1115	457	0	10	64	0	0
1116	457	0	12	64	0	0
1117	458	1	0	78	0	0	0
1118	458	0	1	78	0	0
1119	459	1	0	75	1	1	10
1120	460	1	0	73	1	1
1121	460	0	2	73	1	1
1122	461	1	0	70	0	0	2
1123	461	0	3	70	0	0
1124	462	1	1	71	0	0
1125	463	1	0	76	1	1	4
1126	464	1	0	48	0	0	1
1127	464	0	1	48	0	0
1128	464	0	3	48	0	0
1129	465	1	0	78	0	0	4
1130	465	0	3	78	0	0
1131	466	1	0	77	0	0	2
1132	467	1	0	64	0	0	1
1133	468	1	0	74	0	1	6
1134	468	0	1	74	0	1
1135	469	1	0	69	0	0	3
1136	469	0	1	69	0	0
1137	470	1	0	79	0	0
1138	471	1	0	78	0	0	0
1139	471	0	1	78	0	0
1140	471	0	4	78	0	0
1141	472	1	0	73	1	1
1143	472	0	11	73	1	1
1144	472	0	13	73	1	1
1145	473	1	0	84	1	1
1146	473	0	1	84	1	1
1147	473	0	3	84	1	1
1148	474	1	3	61	0	0
1149	474	0	5	61	0	0
1150	475	1	0	84	1	1	1
1151	476	1	0	75	0	0	4
1152	476	0	1	75	0	0
1153	477	1	0	75	1	1	3
1154	477	0	4	75	1	1
1155	477	0	6	75	1	1
1156	477	0	8	75	1	1
1157	477	0	10	75	1	1
1158	478	1	0	73	0	0	0
1159	478	0	1	73	0	0
1160	478	0	4	73	0	0
1161	479	1	0	52	0	0	4
1162	479	0	2	52	0	0
1163	479	0	4	52	0	0
1164	479	0	7	52	0	0
1165	480	1	0	76	0	0	0
1166	480	0	1	76	0	0
1167	480	0	4	76	0	0
1168	480	0	6	76	0	0
1169	481	1	0	55	0	0	3
1170	482	1	0	66	0	0	4
1171	483	1	2	58	1	1
1172	484	1	0	72	0	0	2
1173	484	0	1	72	0	0
1174	485	1	0	80	0	0	1
1175	485	0	2	80	0	0
1176	485	0	5	80	0	0
1177	485	0	7	80	0	0
1178	485	0	9	80	0	0
1179	486	1	0	52	0	0	0
1180	486	0	3	52	0	0
1181	487	1	0	84	1	1	5
1182	487	0	1	84	1	1
1183	487	0	3	84	1	1
1184	487	0	5	84	1	1
1185	488	1	0	87	1	1
1186	488	0	2	87	1	1
1187	488	0	4	87	1	1
1188	488	0	7	87	1	1
1189	489	1	0	63	0	0	2
1190	489	0	4	63	0	0
1191	490	1	4	56	0	0
1192	490	0	7	56	0	0
1193	491	1	1	68	0	1
1194	491	0	2	68	0	1
1195	491	0	3	68	0	1
1196	491	0	6	68	0	1
1197	491	0	8	68	0	1
1198	491	0	10	68	0	1
1199	492	1	0	59	0	0	5
1200	492	0	1	59	0	0
1201	493	1	0	42	0	0	3
1202	493	0	1	42	0	0
1203	494	1	0	65	0	0	2
1204	494	0	2	65	0	0
1205	494	0	3	65	0	0
1206	495	1	0	67	0	1	12
1207	495	0	2	67	0	1
1208	495	0	4	67	0	1
1209	495	0	6	67	0	1
1210	495	0	6	67	0	1
1211	495	0	7	67	0	1
1212	496	1	0	86	1	1	6
1213	496	0	1	86	1	1
1214	497	1	9	49	0	1
1215	497	0	12	49	0	1
1216	498	1	0	22	0	0	5
1217	498	0	1	22	0	0
1218	498	0	3	22	0	0
1219	498	0	5	22	0	0
1220	499	1	0	87	0	0	2
1221	500	1	0	84	1	1	4
1222	500	0	1	84	1	1
1223	500	0	2	84	1	1
1224	500	0	4	84	1	1
1225	500	0	7	84	1	1
1226	500	0	9	84	1	1
1227	501	1	0	85	0	0	0
1228	501	0	4	85	0	0
1229	501	0	6	85	0	0
1230	501	0	8	85	0	0
1231	501	0	11	85	0	0
1232	502	1	0	57	0	0	1
1233	503	1	0	76	1	1
1234	503	0	1	76	1	1
1235	504	1	0	76	0	0
1236	504	0	13	76	0	0
1237	504	0	15	76	0	0
1238	504	0	18	76	0	0
1239	505	1	0	43	0	0	0
1240	506	1	0	60	1	1	3
1241	506	0	2	60	1	1
1242	507	1	0	63	0	0
1243	507	0	7	63	0	0
1244	508	1	0	73	0	0	4
1245	509	1	0	56	0	0	2
1246	510	1	0	87	0	0	5
1247	510	0	2	87	0	0
1248	510	0	4	87	0	0
1249	510	0	7	87	0	0
1250	511	1	0	77	0	1	6
1251	511	0	1	77	0	1
1252	512	1	0	77	0	0	13
1253	512	0	1	77	0	0
1254	512	0	3	77	0	0
1255	512	0	5	77	0	0
1256	512	0	8	77	0	0
1257	512	0	12	77	0	0
1258	513	1	0	82	1	1
1259	513	0	1	82	1	1
1260	513	0	3	82	1	1
1261	514	1	0	79	1	1
1262	514	0	1	79	1	1
1263	514	0	3	79	1	1	11
1264	514	0	7	79	1	1
1265	514	0	10	79	1	1
1266	514	0	11	79	1	1
1267	514	0	14	79	1	1
1268	514	0	16	79	1	1
1269	515	1	1	70	0	0
1270	515	0	4	70	0	0
1271	516	1	0	79	0	0	4
1272	516	0	1	79	0	0
1273	516	0	2	79	0	0
1274	516	0	4	79	0	0
1275	516	0	7	79	0	0
1276	517	1	0	58	0	0	4
1277	517	0	1	58	0	0
1278	517	0	3	58	0	0
1279	517	0	5	58	0	0
1280	517	0	9	58	0	0
1281	517	0	10	58	0	0
1282	518	1	0	86	1	1	8
1283	519	1	0	57	0	0	4
1284	519	0	4	57	0	0
1285	519	0	6	57	0	0
1286	519	0	8	57	0	0
1287	520	1	0	82	0	0	2
1288	520	0	3	82	0	0
1289	520	0	5	82	0	0
1290	520	0	8	82	0	0
1291	521	1	0	66	0	0	6
1292	522	1	0	82	0	0	2
1293	522	0	3	82	0	0
1294	523	1	0	52	0	0	0
1295	523	0	1	52	0	0
1296	524	1	0	85	1	1
1297	525	1	0	69	0	1	10
1298	525	0	1	69	0	1
1299	525	0	3	69	0	1
1300	526	1	0	88	0	0	0
1301	526	0	1	88	0	0
1302	527	1	0	87	0	0	0
1303	527	0	3	87	0	0
1304	527	0	4	87	0	0
1305	527	0	6	87	0	0
1306	527	0	8	87	0	0
1307	527	0	11	87	0	0
1308	528	1	0	83	1	1	7
1309	528	0	2	83	1	1
1310	529	1	0	89	0	0
1311	529	0	3	89	0	0
1312	529	0	6	89	0	0
1313	529	0	8	89	0	0
1314	529	0	13	89	0	0
1315	530	1	0	72	0	1	3
1316	530	0	2	72	0	1
1317	530	0	8	72	0	1
1318	531	1	0	61	0	0	0
1319	532	1	0	35	0	0	1
1320	533	1	0	75	0	0	2
1321	533	0	1	75	0	0
1322	533	0	4	75	0	0
1323	533	0	6	75	0	0
1324	534	1	0	89	1	1
1325	534	0	2	89	1	1
1326	534	0	4	89	1	1
1327	534	0	5	89	1	1
1328	534	0	7	89	1	1
1329	535	1	0	69	1	1	6
1330	536	1	0	67	0	0	4
1331	536	0	2	67	0	0
1332	537	1	0	77	0	0	4
1333	537	0	2	77	0	0
1334	537	0	4	77	0	0
1335	537	0	7	77	0	0
1336	538	1	0	63	0	0	1
1337	539	1	0	70	0	0	0
1338	539	0	1	70	0	0
1339	539	0	3	70	0	0
1340	539	0	5	70	0	0
1341	540	1	0	48	0	0	1
1342	540	0	2	48	0	0
1343	540	0	4	48	0	0
1344	540	0	5	48	0	0
1345	541	1	0	65	1	1	0
1346	541	0	1	65	1	1	1
1347	542	1	0	34	0	0	0
1348	542	0	4	34	0	0
1349	543	1	0	71	0	0	1
1350	544	1	0	39	0	0
1351	544	0	1	39	0	0
1352	544	0	3	39	0	0
1353	544	0	4	39	0	0	1
1354	544	0	6	39	0	0
1355	545	1	0	57	0	0
1356	545	0	2	57	0	0
1357	546	1	0	63	0	0	6
1358	547	1	0	51	0	1
1359	547	0	7	51	0	1	6
1360	547	0	7	51	0	1	5
1361	547	0	8	51	0	1	5
1362	547	0	9	51	0	1	4
1363	547	0	10	51	0	1	3
1364	547	0	11	51	0	1	2
1365	547	0	12	51	0	1	2
1366	547	0	13	51	0	1	4
1367	547	0	14	51	0	1	1
1368	547	0	15	51	0	1	0
1369	547	0	16	51	0	1	1
1370	548	1	0	35	0	1
1371	548	0	2	35	0	0
1372	549	1	0	66	0	0
1373	549	0	5	66	0	0
1374	549	0	9	66	0	0
1375	549	0	13	66	0	0
1376	549	0	15	66	0	0	13
1377	549	0	16	66	0	0	9
1378	549	0	19	66	0	0	9
1379	550	1	0	47	0	0
1380	551	1	0	76	0	0
1381	551	0	2	76	0	0
1382	551	0	6	76	0	0
1383	551	0	9	76	0	0
1384	552	1	0	50	0	0
1385	552	0	5	50	0	0
1386	552	0	7	50	0	0
1387	552	0	8	50	0	0
1388	553	1	0	26	0	0
1389	553	0	2	26	0	0
1390	554	1	0	70	0	1
1391	554	0	4	70	0	1	6
1392	554	0	5	70	0	1	5
1393	554	0	6	70	0	1	11
1394	554	0	7	70	0	1	11
1395	554	0	8	70	0	1	4
1396	554	0	9	70	0	1	4
1397	554	0	10	70	0	1	2
1398	554	0	11	70	0	1	2
1399	555	1	0	38	0	1
1400	555	0	3	38	0	1	8
1401	555	0	4	38	0	1	6
1402	555	0	5	38	0	1	8
1403	555	0	6	38	0	1	7
1404	555	0	7	38	0	1	7
1405	555	0	8	38	0	1	7
1406	555	0	9	38	0	1	7
1407	555	0	10	38	0	1	5
1408	555	0	11	38	0	1	5
1409	555	0	12	38	0	1	3
1410	556	1	0	71	0	1	3
1411	556	0	4	71	0	1	11
1412	556	0	5	71	0	1	10
1413	556	0	6	71	0	1	16
1414	556	0	7	71	0	1	16
1415	556	0	8	71	0	1	15
1416	556	0	9	71	0	1	13
1417	556	0	10	71	0	1	7
1418	556	0	11	71	0	1	8
1419	556	0	12	71	0	1	7
1420	556	0	13	71	0	1	5
1421	557	1	0	81	1	1
1422	557	0	2	81	1	1	5
1423	558	1	0	40	0	1
1424	558	0	0	40	0	1	8
1425	558	0	1	40	0	1	4
1426	558	0	2	40	0	1	6
1427	558	0	3	40	0	1	6
1428	558	0	4	40	0	1	4
1429	558	0	4	40	0	1	2
1430	558	0	5	40	0	1	1
1431	558	0	6	40	0	1	0
1432	558	0	7	40	0	1	1
1433	558	0	8	40	0	1
1434	559	1	0	80	1	1
1435	559	0	0	80	1	1	2
1436	559	0	2	80	1	1	1
1437	559	0	2	80	1	1	4
1438	559	0	3	80	1	1	5
1439	559	0	4	80	1	1	8
1440	559	0	5	80	1	1	13
1441	559	0	6	80	1	1	18
1442	559	0	7	80	1	1	16
1443	559	0	8	80	1	1	11
1444	559	0	9	80	1	1
1445	560	1	0	75	1	1
1446	560	0	1	75	1	1	13
1447	560	0	2	75	1	1	16
1448	560	0	3	75	1	1	18
1449	560	0	4	75	1	1	22
1450	560	0	5	75	1	1	18
1451	560	0	6	75	1	1	15
1452	560	0	7	75	1	1	12
1453	560	0	8	75	1	1	8
1454	560	0	9	75	1	1	9
1455	560	0	10	75	1	1	10
1456	561	1	0	73	0	0
1457	561	0	1	73	0	0	7
1458	561	0	2	73	0	0	6
1459	561	0	7	73	0	0	0
1460	562	1	0	73	0	0
1461	562	0	3	73	0	0	1
1462	563	1	0	59	0	0
1463	563	0	1	59	0	0	0
1464	563	0	2	59	0	0	0
1465	564	1	0	26	0	0
1466	564	0	5	26	0	0
1467	564	0	7	26	0	0	2
1468	565	1	0	63	0	0
1469	565	0	2	63	0	0	5
1470	565	0	4	63	0	0	8
1471	565	0	7	63	0	0	0
1472	566	1	0	56	1	1
1473	566	0	2	56	1	1	10
1474	566	0	4	56	1	1	15
1475	566	0	5	56	1	1	19
1476	566	0	5	56	1	1	14
1477	566	0	5	56	1	1	16
1478	566	0	6	56	1	1	16
1479	566	0	7	56	1	1	13
1480	566	0	10	56	1	1	14
1481	566	0	11	56	1	1	12
1482	567	1	0	63	0	1
1483	567	0	4	63	0	1	12
1484	567	0	5	63	0	1	12
1485	567	0	6	63	0	1	11
1486	567	0	7	63	0	1	10
1487	567	0	8	63	0	1	9
1488	567	0	9	63	0	1	9
1489	567	0	10	63	0	1	8
1490	567	0	11	63	0	1	8
1491	567	0	12	63	0	1	5
1492	567	0	13	63	0	1	6
1493	568	1	0	62	0	0
1494	568	0	1	62	0	0	9
1495	569	1	0	75	0	0	1
1496	569	0	1	75	0	0	0
1497	569	0	1	75	0	0	0
1498	570	1	0	48	0	0	2
1499	570	0	1	48	0	0	1
1500	570	0	3	48	0	0	0
1501	571	1	0	56	0	0	5
1502	571	0	1	56	0	0	5
1503	571	0	2	56	0	0	3
1504	571	0	3	56	0	0	2
1505	572	1	0	69	1	1	6
1506	572	0	1	69	1	1	4
1507	573	1	4	71	1	1	14
1508	574	1	2	65	0	0
1509	574	0	4	65	0	0
1510	574	0	6	65	0	0	2
1511	574	0	11	65	0	0	4
1512	574	0	13	65	0	0	6
1513	574	0	15	65	0	0	5
1514	574	0	17	65	0	0	4
1515	575	1	4	65	0	0
1516	576	1	13	64	0	0	0
1517	577	1	5	77	1	1	8
1518	577	0	7	77	1	1	14
1519	577	0	10	77	1	1	11
1520	578	1	4	42	0	0	6
1521	579	1	5	56	0	0	0
1522	579	0	9	56	0	0	0
1523	579	0	11	56	0	0	2
1524	579	0	13	56	0	0	3
1525	579	0	16	56	0	0	0
1526	580	1	0	86	1	1
1527	580	0	5	86	1	1	7
1528	581	1	2	78	1	1	1
1529	581	0	4	78	1	1	4
1530	581	0	7	78	1	1	7
1531	581	0	9	78	1	1	6
1532	581	0	11	78	1	1	7
1533	581	0	14	78	1	1	7
1534	582	1	1	77	1	1
1535	582	0	3	77	1	1
1536	582	0	4	77	1	1
1537	582	0	6	77	1	1	1
1538	582	0	8	77	1	1	6
1539	583	1	1	66	1	1
1540	583	0	2	66	1	1
1541	583	0	3	66	1	1	7
1542	583	0	5	66	1	1	5
1543	583	0	8	66	1	1	12
1544	583	0	10	66	1	1	11
1545	583	0	10	66	1	1	9
1546	583	0	12	66	1	1	8
1547	583	0	15	66	1	1	7
1548	584	1	1	46	0	0
1549	584	0	6	46	0	0	2
1550	584	0	9	46	0	0	0
1551	584	0	13	46	0	0	0
1552	585	1	1	90	0	0	2
1553	585	0	3	90	0	0	3
1554	585	0	5	90	0	0	1
1555	586	1	0	82	0	0
1556	586	0	2	82	0	0	0
1557	587	1	0	67	0	1
1558	587	0	2	67	0	1	1
1559	587	0	4	67	0	1	1
1560	587	0	5	67	0	1	4
1561	587	0	7	67	0	1	4
1562	587	0	9	67	0	1	4
1563	587	0	12	67	0	1	1
1564	588	1	1	81	0	0	6
1565	588	0	3	81	0	0	1
1566	589	1	1	74	0	0	1
1567	589	0	3	74	0	0	0
1568	590	1	1	76	0	0
1569	590	0	2	76	0	0
1570	590	0	5	76	0	0
1571	590	0	7	76	0	0	0
1572	591	1	0	53	0	0
1573	591	0	1	53	0	0
1574	591	0	2	53	0	0	5
1575	591	0	4	53	0	0	3
1576	592	1	0	68	0	0
1577	592	0	5	68	0	0	2
1578	592	0	7	68	0	0	1
1579	592	0	9	68	0	0	2
1580	592	0	11	68	0	0	3
1581	593	1	0	77	0	0
1582	593	0	3	77	0	0	1
1583	594	1	1	74	1	1	2
1584	594	0	2	74	1	1	2
1585	594	0	5	74	1	1	6
1586	594	0	5	74	1	1	1
1587	594	0	7	74	1	1	8
1588	594	0	9	74	1	1	5
1589	594	0	12	74	1	1	8
1590	595	1	0	81	0	0
1591	595	0	2	81	0	0	0
1592	596	1	0	79	0	0
1593	596	0	8	79	0	0
1594	596	0	9	79	0	0	6
1595	597	1	0	85	1	1
1596	597	0	2	85	1	1	6
1597	598	1	0	83	0	0
1598	598	0	2	83	0	0	0
1599	599	1	0	69	0	0
1600	599	0	1	69	0	0	5
1601	599	0	2	69	0	0	6
1602	599	0	4	69	0	0	4
1603	599	0	6	69	0	0	0
1604	599	0	8	69	0	0	0
1605	599	0	9	69	0	0	0
1606	599	0	11	69	0	0	0
1607	600	1	0	68	0	0
1608	600	0	1	68	0	0	3
1609	600	0	3	68	0	0	1
1610	601	1	0	42	0	0
1611	601	0	2	42	0	0	7
1612	601	0	4	42	0	0	1
1613	602	1	1	69	0	0	2
1614	602	0	3	69	0	0	3
1615	602	0	4	69	0	0	2
1616	602	0	6	69	0	0	8
1617	602	0	8	69	0	0	8
1618	602	0	10	69	0	0	4
1619	603	1	2	47	0	1	3
1620	603	0	4	47	0	1	6
1621	603	0	6	47	0	1	12
1622	603	0	7	47	0	1	8
1623	603	0	8	47	0	1	11
1624	603	0	9	47	0	1	10
1625	603	0	10	47	0	1	8
1626	603	0	11	47	0	1	8
1627	604	1	0	65	0	1
1628	604	0	3	65	0	1	2
1629	604	0	5	65	0	1	2
1630	604	0	7	65	0	1	2
1631	605	1	1	76	1	1
1632	605	0	4	76	1	1
1633	605	0	7	76	1	1	4
1634	605	0	9	76	1	1	6
1635	606	1	1	78	0	0	1
1636	606	0	2	78	0	0	1
1637	607	1	0	70	0	0	1
1638	607	0	1	70	0	0	0
1639	607	0	2	70	0	0	1
1640	607	0	4	70	0	0
1641	607	0	6	70	0	0	1
1642	607	0	8	70	0	0	1
1643	608	1	0	73	1	1	5
1644	608	0	2	73	1	1	7
1645	608	0	4	73	1	1	8
1646	609	1	0	70	0	1
1647	609	0	1	70	0	1	9
1648	609	0	3	70	0	1	8
1649	609	0	5	70	0	1	13
1650	609	0	5	70	0	1	12
1651	610	1	0	69	0	1
1652	610	0	2	69	0	1	2
1653	610	0	4	69	0	1	8
1654	610	0	5	69	0	1	10
1655	610	0	7	69	0	1	14
1656	610	0	10	69	0	1	11
1657	611	1	0	82	0	0
1658	611	0	2	82	0	0	3
1659	612	1	0	64	0	0	0
1660	612	0	2	64	0	0	3
1661	612	0	4	64	0	0	3
1662	613	1	0	69	0	1
1663	613	0	1	69	0	1	7
1664	613	0	6	69	0	1	9
1665	613	0	9	69	0	1	7
1666	614	1	0	62	0	0
1667	614	0	8	62	0	0	2
1668	614	0	10	62	0	0	5
1669	614	0	12	62	0	0	2
1670	614	0	14	62	0	0	5
1671	614	0	16	62	0	0	5
1672	614	0	18	62	0	0	7
1673	615	1	1	52	0	0	4
1674	615	0	2	52	0	0	7
1675	615	0	4	52	0	0	7
1676	616	1	1	81	1	1	7
1677	616	0	3	81	1	1	4
1678	616	0	4	81	1	1	3
1679	616	0	6	81	1	1	7
1680	617	1	0	83	1	1
1681	617	0	1	83	1	1	0
1682	617	0	3	83	1	1	2
1683	617	0	5	83	1	1	6
1684	618	1	2	76	0	0	8
1685	618	0	4	76	0	0	6
1686	618	0	6	76	0	0	4
1687	618	0	8	76	0	0	2
1688	619	1	2	54	0	0	2
1689	619	0	4	54	0	0	1
1690	620	1	3	60	0	1	8
1691	620	0	3	60	0	1	8
1692	620	0	5	60	0	1	7
1693	620	0	8	60	0	1	10
1694	621	1	2	78	1	1	6
1695	622	1	0	54	0	0
1696	622	0	5	54	0	0	5
1697	623	1	0	65	0	0	1
1698	623	0	2	65	0	0	1
1699	623	0	4	65	0	0	3
1700	623	0	6	65	0	0	1
1701	624	1	0	80	1	1	4
1702	624	0	1	80	1	1	1
1703	624	0	3	80	1	1	2
1704	625	1	0	74	0	1	9
1705	625	0	2	74	0	1	22
1706	625	0	3	74	0	1	18
1707	625	0	4	74	0	1	17
1708	625	0	7	74	0	1	16
1710	627	1	0	63	0	0	7
1711	627	0	1	63	0	0
1712	627	0	3	63	0	0	2
1713	627	0	5	63	0	0	2
1714	628	1	0	71	0	0	1
1715	628	0	1	71	0	0	2
1716	628	0	3	71	0	0	5
1717	629	1	0	68	0	0	2
1718	629	0	1	68	0	0	5
1719	629	0	5	68	0	0	2
1720	630	1	0	65	0	0	5
1721	630	0	1	65	0	0	5
1722	630	0	3	65	0	0	3
1723	631	1	0	31	0	0	0
1724	631	0	2	31	0	0	1
1725	631	0	4	31	0	0	2
1726	631	0	6	31	0	0	2
1727	632	1	0	57	0	0	0
1728	632	0	2	57	0	0	0
1729	632	0	4	57	0	0	1
1730	632	0	6	57	0	0	4
1731	633	1	0	61	0	0
1732	633	0	3	61	0	0	0
1733	633	0	5	61	0	0	2
1734	633	0	7	61	0	0	0
1735	634	1	0	70	0	1	3
1736	634	0	2	70	0	1	3
1737	634	0	5	70	0	1	10
1738	634	0	8	70	0	1	10
1739	635	1	0	49	0	0
1740	635	0	5	49	0	0	0
1741	635	0	6	49	0	0	3
1742	636	1	0	73	0	0	4
1743	636	0	1	73	0	0	2
1744	636	0	3	73	0	0	1
1745	636	0	5	73	0	0	1
1746	637	1	0	49	0	0	0
1747	637	0	2	49	0	0	0
1748	637	0	4	49	0	0	1
1749	638	1	0	74	0	0	0
1750	638	0	2	74	0	0	0
1751	639	1	0	75	0	0	0
1752	639	0	1	75	0	0	0
1753	639	0	3	75	0	0	0
1754	640	1	0	72	0	1	1
1755	640	0	2	72	0	1	1
1756	640	0	6	72	0	1	7
1757	640	0	8	72	0	1	8
1758	641	1	0	84	1	1	6
1759	641	0	1	84	1	1	8
1760	642	1	0	47	0	0	0
1761	642	0	5	47	0	0	0
1762	642	0	7	47	0	0	0
1763	643	1	0	75	0	0	3
1764	643	0	1	75	0	0	3
1765	643	0	3	75	0	0	5
1766	643	0	5	75	0	0	4
1767	643	0	7	75	0	0	8
1768	644	1	0	61	0	0	0
1769	644	0	1	61	0	0	0
1770	645	1	0	64	0	0
1771	645	0	9	64	0	0	4
1772	645	0	13	64	0	0	3
1773	646	1	0	84	1	1	4
1774	646	0	2	84	1	1	6
1775	646	0	6	84	1	1	16
1776	647	1	0	82	1	1	0
1777	647	0	2	82	1	1	4
1778	648	1	0	75	0	0	0
1779	649	1	0	57	0	0	1
1780	649	0	1	57	0	0	3
1781	649	0	3	57	0	0	0
1782	649	0	6	57	0	0	2
1783	650	1	2	73	1	1	4
1784	651	1	10	40	0	0	2
1785	651	0	13	40	0	0	1
1786	651	0	16	40	0	0	3
1787	652	1	0	57	0	0	3
1788	652	0	2	57	0	0	1
1789	652	0	3	57	0	0	4
1790	652	0	5	57	0	0	4
1791	653	1	0	77	1	1	1
1792	653	0	2	77	1	1	3
1793	653	0	5	77	1	1	10
1794	654	1	0	62	0	0	2
1795	654	0	2	62	0	0	0
1796	655	1	0	74	0	0	1
1797	655	0	2	74	0	0	0
1798	656	1	0	75	0	0	1
1799	656	0	2	75	0	0	1
1800	656	0	3	75	0	0	0
1801	657	1	0	73	0	0	3
1802	657	0	2	73	0	0	3
1803	658	1	0	63	0	0	0
1804	658	0	1	63	0	0	0
1805	658	0	3	63	0	0	5
1806	658	0	5	63	0	0	4
1807	659	1	0	90	1	1	0
1808	659	0	4	90	1	1	8
1809	660	1	0	57	0	0	3
1810	660	0	2	57	0	0	0
1811	661	1	0	58	0	0	1
1812	661	0	2	58	0	0	2
1813	662	1	0	63	0	0	1
1814	662	0	1	63	0	0	5
1815	662	0	3	63	0	0	1
1816	663	1	0	86	1	1	2
1817	663	0	2	86	1	1	7
1818	663	0	4	86	1	1	7
1819	664	1	0	52	0	0	0
1820	664	0	2	52	0	0	0
1821	665	1	0	73	0	0	0
1822	665	0	1	73	0	0	8
1823	665	0	2	73	0	0	1
1824	665	0	4	73	0	0	3
1825	665	0	5	73	0	0	4
1826	666	1	0	68	0	1	4
1827	666	0	2	68	0	1	8
1828	666	0	4	68	0	1
1829	666	0	6	68	0	1	7
1830	667	1	0	68	0	0	6
1831	668	1	5	78	1	1	0
1832	669	1	4	49	0	0	8
1833	670	1	0	53	0	0	0
1834	670	0	3	53	0	0	2
1835	671	1	0	76	0	0	3
1836	672	1	0	75	1	1	5
1837	672	0	1	75	1	1	4
1838	672	0	3	75	1	1	5
1839	673	1	0	58	0	0	0
1840	673	0	3	58	0	0	0
1841	674	1	0	67	1	1	9
1842	674	0	3	67	1	1	8
1843	675	1	0	83	0	0	3
1844	676	1	0	77	1	1	5
1845	676	0	1	77	1	1	4
1846	676	0	3	77	1	1	7
1847	677	1	0	82	1	1	0
1848	677	0	2	82	1	1	0
1849	677	0	4	82	1	1	1
1850	678	1	0	88	1	1	3
1851	678	0	1	88	1	1	6
1852	678	0	3	88	1	1	8
1853	679	1	0	62	0	0	2
1854	679	0	2	62	0	0	1
1855	680	1	0	72	0	0
1856	680	0	2	72	0	0	5
1857	681	1	0	68	0	0	1
1858	681	0	2	68	0	0	0
1859	682	1	0	63	0	0	4
1860	682	0	1	63	0	0	5
1861	682	0	3	63	0	0	2
1862	683	1	0	44	0	0	0
1863	683	0	5	44	0	0	0
1864	683	0	6	44	0	0	0
1865	683	0	7	44	0	0	0
1866	684	1	0	69	0	0	1
1867	684	0	3	69	0	0	2
1868	685	1	0	75	1	1	1
1869	685	0	1	75	1	1	4
1870	685	0	3	75	1	1	5
1871	686	1	0	79	1	1	0
1872	686	0	1	79	1	1	0
1873	686	0	2	79	1	1	3
1874	686	0	4	79	1	1	6
1875	687	1	0	77	1	1	7
1876	687	0	3	77	1	1	4
1877	688	1	0	67	0	0	3
1878	688	0	1	67	0	0	1
1879	689	1	1	87	0	0	2
1880	689	0	3	87	0	0	7
1881	690	1	0	85	1	1	0
1882	690	0	2	85	1	1	2
1883	691	1	1	64	0	0	0
1884	691	0	2	64	0	0	0
1885	692	1	0	67	0	0	0
1886	692	0	2	67	0	0	0
1887	693	1	0	58	0	1	0
1888	693	0	3	58	0	1	7
1889	694	1	0	56	0	0	4
1890	694	0	1	56	0	0	3
1891	694	0	3	56	0	0	4
1892	695	1	3	66	1	1	20
1893	695	0	4	66	1	1	20
1894	695	0	5	66	1	1	24
1895	695	0	6	66	1	1	24
1896	695	0	7	66	1	1	23
1897	696	1	3	49	0	1	5
1898	696	0	3	49	0	1	7
1899	696	0	3	49	0	1	2
1900	696	0	3	49	0	1	8
1901	696	0	20	49	0	1	3
1902	696	0	21	49	0	1	3
1903	696	0	22	49	0	1	3
1904	696	0	23	49	0	1	2
1905	696	0	24	49	0	1	1
1906	697	1	2	61	0	0
1907	697	0	3	61	0	0
1908	698	1	20	56	0	1	3
1909	698	0	21	56	0	1	3
1910	698	0	22	56	0	1	6
1911	698	0	23	56	0	1	2
1912	698	0	24	56	0	1	3
1913	698	0	25	56	0	1	1
1914	698	0	26	56	0	1	0
1916	700	1	0	62	0	0	2
1928	703	1	2	59	0	1	7
1929	703	0	3	59	0	1	12
1930	703	0	4	59	0	1	12
1931	703	0	5	59	0	1	13
1932	703	0	6	59	0	1	16
1933	703	0	7	59	0	1	16
1934	703	0	8	59	0	1	16
1935	704	1	2	72	0	1	7
1936	704	0	3	72	0	1	7
1937	704	0	4	72	0	1	7
1938	704	0	5	72	0	1	8
1939	704	0	6	72	0	1	8
1940	704	0	7	72	0	1	9
1941	704	0	8	72	0	1	9
1942	705	1	1	54	0	1	7
1943	705	0	3	54	0	1	9
1944	705	0	4	54	0	1	8
1945	705	0	5	54	0	1	5
1946	705	0	6	54	0	1	5
1947	706	1	5	68	0	0
1948	707	1	3	42	0	0	0
1949	707	0	5	42	0	0
1950	708	1	0	58	0	0	4
1951	709	1	0	74	0	1	4
1952	709	0	1	74	0	1	3
1953	709	0	2	74	0	1	1
1954	709	0	3	74	0	1	4
1955	709	0	4	74	0	1	6
1956	710	1	1	68	1	1	4
1957	710	0	1	68	1	1	13
1958	710	0	2	68	1	1	19
1959	710	0	4	68	1	1	16
1960	711	1	3	73	0	1	7
1961	711	0	3	73	0	1	11
1962	711	0	4	73	0	1	8
1963	712	1	0	62	0	1	1
1964	712	0	1	62	0	1	2
1965	712	0	2	62	0	1	6
1966	712	0	3	62	0	1	14
1967	712	0	4	62	0	1	11
1968	713	1	0	18	0	0	0
1969	714	1	3	83	0	0	0
1970	715	1	1	74	0	0	5
1971	716	1	3	77	0	0	2
1972	717	1	0	61	0	1	5
1973	717	0	0	61	0	1	9
1974	717	0	1	61	0	1	10
1975	717	0	2	61	0	1	7
1976	718	1	0	61	0	1	9
1977	718	0	1	61	0	1	14
1978	718	0	2	61	0	1	10
1979	719	1	0	69	0	0	1
1980	720	1	0	74	0	0	2
1981	721	1	0	76	0	1	12
1982	721	0	1	76	0	1	10
1983	722	1	0	61	0	0	0
1984	723	1	0	70	0	1	10
1985	723	0	1	70	0	1	12
1986	724	1	1	77	0	1	3
1987	724	0	1	77	0	1	6
1988	725	1	0	69	0	1	2
1989	726	1	0	54	0	1	1
1991	728	1	0	67	0	0
1992	729	1	0	74	0	1	0
1993	729	0	0	74	0	1	0
1994	730	1	0	53	0	1	6
1995	730	0	1	53	0	1	2
1996	730	0	2	53	0	1	3
1997	730	0	3	53	0	1	5
1998	730	0	4	53	0	1	8
1999	731	1	1	56	0	0	0
2000	732	1	0	38	0	0	0
2001	733	1	0	76	0	1	1
2002	734	1	0	70	0	0	1
2003	735	1	4	73	0	1	6
2004	735	0	4	73	0	1	6
2005	735	0	5	73	0	1	4
2006	735	0	6	73	0	1	10
2007	735	0	7	73	0	1	9
2008	735	0	8	73	0	1	8
2009	735	0	9	73	0	1	8
2010	736	1	0	33	0	0	0
2011	737	1	0	57	0	1	2
2012	737	0	1	57	0	1	3
2013	737	0	2	57	0	1	7
2014	738	1	0	62	0	0	0
2015	739	1	2	61	1	1
2016	739	0	4	61	1	1
2017	740	1	1	77	0	0
2018	740	0	2	77	0	0
[truncated: 589 more rows]
