# Supplementary material for: A novel haemocytometric COVID-19 prognostic score developed and validated in an observational multicentre European hospital-based study
Source: eLife journal article supplement (doi:10.7554/elife.63195), 2020-11-26
Supplement: supp [file elife-63195-supp-v1.zip › elife_poa_e63195_Figure_3_source_data_2.csv]

Figure 3 � source data file 2. Source data for trends of neutrophil-to-lymphocyte ratio over 14 days of hospitalisation in critical (C) and non-critical (NC) patients
Filename	exclusion	Pat_ID	length_of_hospitalisation	Critical_or_Fatal	N/L ratio
1	0	1	0	1	1,135245902
2	0	1	2	1	2,131034483
3	0	1	2	1	3,439655172
4	0	1	3	1	4,74
5	0	1	4	1	2,344827586
6	0	1	15	1	4,128378378
7	0	2	0	0	6,412371134
8	0	2	1	0	2,709219858
9	0	2	2	0	3,2265625
10	0	2	3	0	2,274285714
11	0	2	4	0	1,582938389
12	0	2	6	0	1,848341232
13	0	3	0	1	5,445945946
14	0	3	1	1	2,676190476
15	0	3	1	1	7,72972973
16	0	3	2	1	7,786666667
17	0	3	3	1	5,057692308
18	0	3	4	1	4,955223881
19	0	3	4	1	4,967741935
20	0	3	5	1	5,152777778
21	0	3	6	1	3,638095238
22	0	3	7	1	3,032258065
23	0	3	8	1	2,126126126
24	0	3	9	1	1,993630573
25	0	3	10	1	2,611111111
26	0	3	11	1	2,056737589
27	0	3	12	1	3,089108911
28	0	3	13	1	2,903225806
29	0	4	0	1	8,366197183
30	0	4	1	1	52,33333333
31	0	4	1	1	36,05555556
32	0	4	2	1	14,675
33	0	4	3	1	54,73333333
34	0	4	4	1	65,1875
35	0	4	5	1	132,5
36	0	4	6	1	21,13793103
37	0	4	7	1	32,6097561
38	0	4	8	1	20,46341463
39	0	4	9	1	16,09722222
40	0	4	10	1	12,96907216
41	0	4	10	1	10,79047619
42	0	4	11	1	11,1
43	0	4	12	1	10,87037037
44	0	4	13	1	13,58888889
45	0	4	14	1	8,078431373
46	0	5	0	0	13,96551724
47	0	5	1	0	15,88
48	0	6	0	0	4,985915493
49	0	6	2	0	5,568965517
50	0	6	3	0	4,214285714
51	0	6	5	0	4,487179487
52	0	7	0	0	3,2
53	0	7	2	0	1,111111111
54	0	7	3	0	0,809782609
55	0	7	4	0	0,751445087
56	0	7	5	0	0,695906433
57	0	7	6	0	0,976190476
58	0	8	1	0	0,85443038
59	0	9	0	0	10,54
60	0	9	2	0
61	0	9	3	0	6,120689655
62	0	9	4	0	6,326923077
63	0	9	5	0	5,365079365
64	0	9	7	0	4,012820513
65	0	10	0	1	8,611111111
66	0	10	1	1	8,727272727
67	0	10	3	1	15,46428571
68	0	10	4	1	34,27777778
69	0	11	0	0	7,676470588
70	0	11	1	0	2,081818182
71	0	11	3	0	1,828282828
72	0	12	0	1	14,8125
73	0	12	2	1	9,764705882
74	0	13	5	1	3,722891566
75	0	13	6	1	5,801204819
76	0	13	7	1	6,143678161
77	0	13	8	1	13,96031746
78	0	13	9	1	11,83823529
79	0	13	9	1	9,671328671
80	0	13	10	1	7,874172185
81	0	13	11	1	7,318181818
82	0	13	12	1	6,105990783
83	0	13	13	1	5,13362069
84	0	14	1	0	2,347826087
85	0	15	13	1	5,056818182
86	0	15	14	1	6,90797546
87	0	15	15	1	4,60952381
88	0	15	16	1	5,673684211
89	0	15	17	1	4,32300885
90	0	15	18	1	4,731343284
91	0	15	19	1	3,474103586
92	0	15	20	1	3,991266376
93	0	16	11	1	3,892156863
94	0	16	12	1	5,070588235
95	0	16	13	1	14,33333333
96	0	16	14	1	7,680555556
97	0	16	15	1	3,870967742
98	0	16	16	1	3,730769231
99	0	16	17	1	8,557823129
100	0	16	18	1	12,59259259
101	0	16	19	1	14,42857143
102	0	17	1	0
103	0	17	2	0	1,602836879
104	0	17	4	0	1,574324324
105	0	18	0	1	22,61111111
106	0	18	2	1	12,13924051
107	0	18	2	1	14,75862069
108	0	18	3	1	15,07017544
109	0	18	4	1	13,04477612
110	0	19	0	1	3,513888889
111	0	19	1	1	5,71942446
112	0	19	3	1	6,630573248
113	0	20	0	0	4,521276596
114	0	20	1	0	2,921985816
115	0	20	3	0	4,357142857
116	0	21	0	1	11,57317073
117	0	22	0	0	3,451327434
118	0	23	0	0	12,22222222
119	0	24	0	0	2,635416667
120	0	25	0	1	8,651162791
121	0	26	0	0	13
122	0	27	0	0	12,19444444
123	0	28	0	0	3,05952381
124	0	29	0	0	3,820224719
125	0	30	0	1
126	0	30	4	1	8,104651163
127	0	31	0	0	9,803921569
128	0	32	0	1	10,96153846
129	0	33	0	1	3,402777778
130	0	34	0	1
131	0	35	0	0	2,141732283
132	0	36	0	1	2,356955381
133	0	37	0	0	13,18181818
134	0	38	0	1	6,31884058
135	0	39	0	0	6,152173913
136	0	40	0	0	3,039325843
137	0	41	0	0	1,34375
138	0	42	0	0	2,009803922
139	0	43	0	0	3,407407407
140	0	44	0	0	11,625
141	0	45	0	1	22,89156627
142	0	45	1	1
143	0	45	1	1
144	0	45	2	1	35,94230769
145	0	45	3	1
146	0	45	4	1	33,04651163
147	0	45	5	1	18,112
148	0	45	5	1
149	0	45	6	1	14,74561404
150	0	45	6	1
151	0	45	7	1	17,42168675
152	0	45	7	1
153	0	45	8	1	22,58108108
154	0	45	9	1	26,17105263
155	0	45	10	1	23,46341463
156	0	45	11	1	18,58163265
157	0	45	12	1	13,74074074
158	0	45	13	1	7,193333333
159	0	45	14	1	9,204081633
160	0	45	15	1	8,490066225
161	0	45	16	1	6,881944444
162	0	45	17	1	6,165413534
163	0	45	18	1	5,131578947
164	0	45	19	1	6,432624113
165	0	45	20	1	5,25308642
166	0	45	21	1	3,874251497
167	0	45	22	1	3,290909091
168	0	46	0	0	4,434782609
169	0	47	0	0	4,47826087
170	0	48	0	1	6,473684211
171	0	49	0	1
172	0	50	0	0	2,89380531
173	0	51	0	0	5,04
174	0	52	0	1	4,483870968
175	0	53	0	1	18,83333333
176	0	54	0	1	7,4625
177	0	54	4	1	8,768115942
178	0	54	10	1	16,27586207
179	0	54	11	1	25,49180328
180	0	55	0	0	1,247572816
181	0	56	0	1	7,139534884
182	0	57	0	0	5,525423729
183	0	58	0	0	7,08
184	0	59	0	0	2,102362205
185	0	60	0	0	9,790322581
186	0	61	0	0	3,992805755
187	0	62	0	1	6,519480519
188	0	63	0	0	4,598214286
189	0	64	0	0	1,252747253
190	0	65	0	0
191	0	66	0	1	17,234375
192	0	67	0	0
193	0	68	0	0	15,66666667
194	0	69	0	0	1,247252747
195	0	70	0	0	1,25
196	0	71	0	0	3,5
197	0	72	0	0	5,2
198	0	73	0	0	4,685483871
199	0	74	0	0	2,138297872
200	0	75	0	0	2,5625
201	0	76	0	0
202	0	77	0	0	3,924050633
203	0	78	0	1	8,545454545
204	0	79	0	0	2,716216216
205	0	79	0	0
206	0	79	1	0
207	0	79	2	0
208	0	79	3	0	2,037593985
209	0	79	5	0	2,156716418
210	0	79	7	0
211	0	79	8	0	2,396551724
212	0	79	9	0
213	0	79	10	0	2,657894737
214	0	79	12	0	3,693548387
215	0	80	0	0	4,336734694
216	0	81	0	1	4,35483871
217	0	82	0	0	11,078125
218	0	83	0	0	5,011111111
220	0	85	0	1	32,7
221	0	86	0	1	6,329113924
222	0	87	0	0	2,25862069
223	0	88	0	0	1,913513514
225	0	90	0	0	10,04210526
226	0	91	0	0	6,322033898
227	0	92	0	0	4,848484848
228	0	93	0	1	18,63043478
229	0	93	1	1
230	0	93	2	1	12,19117647
231	0	94	0	0	3,336
232	0	95	0	0	2,770833333
233	0	96	0	1	11,37837838
234	0	97	0	0	12,71666667
235	0	98	0	0	4,359550562
236	0	98	2	0	4,355140187
237	0	98	4	0
238	0	98	5	0
239	0	98	13	0	2,012738854
240	0	99	0	1	6,338461538
241	0	99	1	1	5
242	0	99	2	1
243	0	99	3	1
244	0	99	4	1
245	0	99	5	1
246	0	100	0	1	5,671232877
247	0	101	0	1	4,5875
248	0	102	0	0	23,12903226
249	0	103	0	1	10,51851852
250	0	103	1	1	9,622222222
251	0	104	0	1	7,189189189
252	0	105	0	0	10,37931034
253	0	106	0	1	8,047619048
254	0	107	0	0	9,523809524
255	0	108	0	0	3,712871287
256	0	109	0	1	3,458333333
257	0	110	0	0	3,358333333
258	0	110	1	0
259	0	110	2	0
260	0	110	3	0
261	0	110	4	0
262	0	110	5	0
263	0	110	6	0
264	0	110	7	0
265	0	110	7	0
266	0	110	8	0	4,010752688
267	0	110	9	0	2,475409836
268	0	110	10	0	2,606557377
269	0	110	11	0	1,220472441
270	0	110	12	0	1,680555556
271	0	110	13	0	1,475862069
272	0	110	16	0	0,790960452
273	0	110	17	0	0,74375
274	0	110	20	0	0,616504854
275	0	111	0	0	4,78125
276	0	112	0	0	6,646464646
277	0	113	0	0	4,734693878
278	0	114	0	1	1,666666667
279	0	115	0	1	6,212598425
280	0	116	0	1	6,851612903
281	0	117	0	0	7,43902439
282	0	118	0	1	17,83018868
283	0	119	0	1	12,50526316
284	0	120	0	1	13,54054054
285	0	121	0	1	3,03286385
286	0	122	0	0	5,804511278
287	0	122	4	0
288	0	122	7	0
289	0	122	9	0
290	0	123	0	1	8,789473684
291	0	124	0	0	4,757009346
292	0	125	0	0	3,006369427
293	0	126	0	1	5,829268293
294	0	126	2	1	12,63013699
295	0	127	0	0	4,606382979
296	0	127	4	0	2,719178082
297	0	128	0	1	4,090909091
298	0	129	0	0	2,086021505
299	0	130	0	1	5,815217391
300	0	131	0	1	4,38
301	0	132	0	1	8,36
302	0	133	0	1	4,988372093
303	0	134	0	1	13,125
304	0	134	2	1	19,8
305	0	134	3	1	23,04347826
306	0	135	0	0	5,512820513
307	0	136	0	0	8,9
308	0	136	5	0	21,77142857
309	0	136	7	0	4,727272727
310	0	136	8	0
311	0	136	9	0	5,68627451
312	0	136	10	0	5,701754386
313	0	136	11	0	4,679487179
314	0	136	12	0	3,696629213
315	0	136	13	0	2,990990991
316	0	136	14	0	3,123893805
317	0	137	0	1	14,70909091
318	0	137	1	1	11,1884058
319	0	137	2	1
320	0	137	4	1	27,5
321	0	138	0	0	4,172839506
322	0	139	0	0	2,318181818
323	0	140	0	0	2,116788321
324	0	140	2	0	2,258333333
325	0	140	6	0	2,18125
326	0	141	0	0	3,695652174
327	0	142	0	1	9,707692308
328	0	143	0	1	9,494845361
329	0	144	0	0	1,75
330	0	145	0	0	5,163461538
331	0	146	0	0	5,338235294
332	0	147	0	1	8,044776119
333	0	148	0	1	49,75
334	0	149	0	0	3,009345794
335	0	150	0	1	12,2238806
336	0	151	0	1	7,08974359
337	0	152	0	0	1,682080925
338	0	153	0	0	13,13513514
339	0	154	0	0	2,577922078
340	0	155	0	0	8,095890411
341	0	156	0	0	9,75
342	0	157	0	1	4,725738397
343	0	158	0	0	5,480392157
344	0	159	0	0	14,89473684
345	0	160	0	0	5,496
346	0	161	0	1	4,070422535
347	0	162	0	1	10,73529412
348	0	163	0	0	7,54954955
349	0	164	0	1	5,635135135
350	0	165	0	1	10,09090909
351	0	166	0	1	4,271186441
352	0	167	0	0	2,285714286
353	0	168	0	0	1,586206897
355	0	170	0	0	16,44444444
356	0	171	0	0	9,266666667
357	0	172	0	0	4,431372549
358	0	173	0	1	4,603174603
359	0	174	0	0	7,546099291
360	0	175	0	1	7,564102564
361	0	176	0	0	1,757961783
362	0	177	0	0	16,16176471
363	0	178	0	1	4
364	0	179	0	0	10,18181818
365	0	179	2	0
366	0	179	3	0
367	0	179	5	0	14,05660377
368	0	179	6	0
369	0	179	6	0
370	0	179	7	0
371	0	179	8	0
372	0	179	9	0	38,8
373	0	179	10	0	33,5
374	0	179	11	0
375	0	179	12	0	17,38961039
376	0	179	13	0
377	0	179	14	0	17,52222222
378	0	179	15	0
379	0	179	16	0	8,754098361
380	0	180	0	1	11,390625
381	0	181	0	0	6,346153846
382	0	182	0	0	2,635135135
383	0	183	0	0	5,642201835
384	0	184	0	0	1,714285714
385	0	185	0	0	0,741573034
386	0	186	0	1	2,10619469
387	0	187	0	0	9,270833333
388	0	188	0	1	3,527027027
389	0	189	0	1	5,436781609
390	0	189	2	1
391	0	189	4	1	8,329545455
392	0	190	0	0	1,705882353
393	0	191	0	0	4,848837209
394	0	192	0	0	19,7804878
395	0	193	0	0	2,647668394
396	0	194	0	1	5,231884058
397	0	195	0	0	4,407960199
398	0	196	0	1	9,058139535
399	0	197	0	0	4,555555556
400	0	198	0	0	5,448818898
401	0	199	0	1	12,02739726
402	0	200	0	1	4,733333333
403	0	201	0	1	6,611764706
404	0	202	0	1	13,03703704
405	0	203	0	1	9,764705882
406	0	204	0	0	2,627329193
407	0	205	0	0	4,5
408	0	206	0	0	1,703703704
409	0	207	0	0	5,432989691
410	0	208	0	1	2,696969697
411	0	209	0	0	6,577319588
412	0	210	0	1	33
413	0	211	0	0	4,561538462
414	0	212	0	1	2,732876712
415	0	213	0	1	3,872
416	0	214	0	1	7,846153846
417	0	215	0	1	3,445652174
418	0	216	0	0	1,43902439
419	0	216	2	0	2,016260163
420	0	216	3	0
421	0	216	4	0	2,377622378
422	0	216	6	0
423	0	216	7	0
424	0	216	9	0	0,897435897
425	0	217	0	1	2,463576159
426	0	217	3	1	9,890756303
427	0	217	5	1	8,525641026
428	0	217	7	1
429	0	218	0	0	4,12849162
430	0	219	0	0	2,932773109
431	0	220	0	1	7,043478261
432	0	221	0	0	19,53333333
433	0	222	0	0	8,415584416
434	0	223	0	1	2,515151515
435	0	224	0	1	6,421052632
436	0	225	0	1	6,186440678
437	0	226	0	0	3,779069767
438	0	227	0	0	5,428571429
439	0	228	0	0	3,111111111
440	0	229	0	0	2,594936709
441	0	230	0	0	1,735483871
442	0	231	0	1	5,530612245
443	0	232	0	0	7,088607595
444	0	233	0	0	6,095588235
445	0	234	0	0	3,817460317
446	0	235	0	0	4,166666667
447	0	236	0	0	3,576923077
448	0	237	1	1	42,23333333
449	0	237	1	1	55,13043478
450	0	237	1	1	48,88888889
451	0	237	2	1	42,41176471
452	0	237	3	1	37,5
453	0	237	4	1	15,38095238
454	0	237	5	1	9,53030303
455	0	238	11	1	9,76
456	0	238	12	1	3,510638298
457	0	238	13	1	3,263959391
458	0	238	14	1	3,280701754
459	0	238	15	1	3,285714286
460	0	238	16	1	4,272251309
461	0	239	0	0	8,273972603
462	0	240	1	0	3,644444444
463	0	240	3	0	9
464	0	240	4	0	7,327586207
465	0	241	0	1	13,2345679
466	0	241	0	1	11,22857143
467	0	241	1	1	12,1443299
468	0	241	2	1	12,56451613
469	0	241	2	1	11,76056338
470	0	241	3	1	14,77777778
471	0	241	4	1	17,825
472	0	241	5	1	9,327868852
473	0	241	5	1	7,315068493
474	0	241	6	1	8,637681159
475	0	242	0	1	25,85416667
476	0	242	1	1	24,20454545
477	0	242	1	1	27,72222222
478	0	242	1	1	11,94444444
479	0	242	2	1	6,892857143
480	0	242	2	1	6,823529412
481	0	243	8	1	7,21969697
482	0	243	9	1	9,544554455
483	0	243	9	1	15,54545455
484	0	243	10	1	12,29850746
485	0	243	11	1	19,44642857
486	0	244	2	0	4,068627451
487	0	244	6	0	1,846715328
488	0	245	2	1	20,22826087
489	0	246	0	0	8,636363636
490	0	246	2	0	6,733333333
491	0	247	2	0	11,8
492	0	247	4	0	11,62745098
493	0	247	5	0	8,742424242
494	0	247	6	0	8,471428571
495	0	248	1	0	2,19379845
496	0	248	2	0	3,877777778
497	0	248	3	0	4,735632184
498	0	248	4	0	4,635416667
499	0	249	2	1	20,24615385
500	0	249	3	1	15,42
501	0	249	3	1	10,53623188
502	0	249	4	1	10,925
503	0	249	4	1	11,43181818
504	0	249	4	1	16,12820513
505	0	249	5	1	12,07692308
506	0	249	6	1	9,615384615
507	0	249	7	1	8,573333333
508	0	250	2	0	4,51754386
509	0	250	5	0	6,397163121
510	0	250	6	0	4,954545455
511	0	251	2	0	2,745614035
512	0	251	3	0	0,786885246
513	0	251	5	0	0,381944444
514	0	252	7	1	6,558139535
515	0	252	8	1	7,305555556
516	0	252	9	1	5,32
517	0	252	10	1	4,64084507
518	0	252	11	1	5,251572327
519	0	252	12	1	10,13461538
520	0	253	6	1	6,367647059
521	0	253	7	1	5,082191781
522	0	253	7	1	5,283950617
523	0	253	7	1	5,944444444
524	0	253	7	1	6,231884058
525	0	253	8	1	4,325581395
526	0	253	9	1	5,148648649
527	0	254	6	1	71,125
528	0	255	6	0	5,528735632
529	0	255	7	0	4,477876106
530	0	255	8	0	2,658064516
531	0	255	9	0	2,119047619
532	0	255	10	0	3,445859873
533	0	256	1	0	8,538461538
534	0	256	2	0	5,303571429
535	0	257	1	1	13,325
536	0	257	3	1	13,33333333
537	0	257	4	1	22
538	0	257	5	1	18,84482759
539	0	258	2	0	3,101694915
540	0	258	3	0	4,177419355
541	0	259	7	0	4,601626016
542	0	259	8	0	4,221374046
543	0	260	0	1	8
544	0	260	2	1	13,20588235
545	0	260	4	1	7,637931034
546	0	260	5	1	10,83333333
547	0	260	6	1	9,475609756
548	0	261	6	1	7,08974359
549	0	261	7	1	5,393617021
550	0	261	8	1	5,016528926
551	0	261	9	1	8,920454545
552	0	261	11	1	7,78021978
553	0	261	12	1	6,902912621
554	0	261	12	1	8,552941176
555	0	262	2	0	3,826923077
556	0	262	4	0	7,743589744
557	0	262	5	0	5,114754098
558	0	262	6	0	6,915254237
559	0	262	7	0	6,195121951
560	0	263	7	0	3,525773196
561	0	263	11	0	3,923076923
562	0	263	12	0	2,780487805
563	0	264	3	0	2,216981132
564	0	264	4	0	2,55
565	0	264	5	0	4,301369863
566	0	264	7	0	3,159574468
567	0	265	0	1	8,195652174
568	0	265	1	1	6,960784314
569	0	265	2	1	5,395061728
570	0	266	0	1	3,75257732
571	0	266	4	1	9,612903226
572	0	266	5	1	9,05
573	0	266	6	1	7,298245614
574	0	266	7	1	10,57142857
575	0	267	0	0	3,623931624
576	0	267	2	0	2,45323741
577	0	268	2	1	19,83333333
578	0	268	2	1	22,88059701
579	0	268	3	1	13,34375
580	0	268	3	1	12,7238806
581	0	269	4	0	1,384297521
582	0	270	3	1	28,16666667
583	0	270	4	1	19,28125
584	0	270	5	1	18,52
585	0	271	7	1	27,48387097
586	0	271	8	1	23,42105263
587	0	271	9	1	17,84782609
588	0	271	9	1	15,74509804
589	0	272	0	0	5,279569892
590	0	272	2	0	9,862068966
591	0	272	5	0	4,547619048
592	0	273	0	0	6,928571429
593	0	274	1	0	10,82608696
594	0	274	3	0	20
595	0	274	4	0	14,04545455
596	0	275	2	1	8,288888889
597	0	275	3	1	7,887096774
598	0	275	4	1	8,595238095
599	0	275	5	1	11,91525424
600	0	275	6	1	19,45833333
601	0	275	7	1	24,95918367
602	0	276	6	0	2,615384615
603	0	276	8	0	3,595505618
604	0	276	9	0	3,779220779
605	0	277	2	0	4,147826087
606	0	277	4	0	3,734848485
607	0	277	6	0	2,409836066
608	0	277	7	0	2,075829384
609	0	278	2	0	4,705882353
610	0	278	3	0	6,970149254
611	0	278	4	0	8,015873016
612	0	279	0	0	2,018292683
613	0	279	2	0	3,155172414
614	0	279	6	0	4,398843931
615	0	279	9	0	6,010869565
616	0	280	0	0	8,34375
617	0	281	16	1	8,191011236
618	0	282	5	0	3,44
619	0	283	1	1	4,234234234
620	0	284	4	0	3,163636364
621	0	284	5	0	3,339622642
622	0	284	6	0	2,727810651
623	0	284	7	0	3,79144385
624	0	285	1	0	3,933884298
625	0	285	3	0	1,815602837
626	0	285	4	0	1,916666667
627	0	286	0	0	2,077464789
628	0	286	2	0	4,731707317
629	0	286	3	0	2,077844311
630	0	286	5	0	2,976923077
631	0	287	4	0	6,591549296
632	0	287	6	0	3,646341463
633	0	288	7	1	6,258928571
634	0	288	8	1	8,424528302
635	0	288	8	1	8,701923077
636	0	288	9	1	11,94214876
637	0	288	9	1	11,272
638	0	288	9	1	11,38709677
639	0	288	9	1	7,780346821
640	0	288	10	1	7,078534031
641	0	288	11	1	8,038043478
642	0	288	11	1	6,24742268
643	0	288	11	1	8,440944882
644	0	289	2	0	3,989010989
645	0	290	2	0	18
646	0	290	4	0	15,04545455
647	0	290	6	0	17,54545455
648	0	291	2	0	14,45454545
649	0	291	4	0	8,808080808
650	0	291	6	0	9,821052632
651	0	292	3	1	5,662790698
652	0	292	4	1	6,87037037
653	0	292	5	1	6,724489796
654	0	293	15	0	40,15789474
655	0	293	17	0	12,68627451
656	0	294	4	0	10,52272727
657	0	294	6	0	5,538461538
658	0	294	7	0	5,739130435
659	0	295	25	1	25,06557377
660	0	296	3	0	1,829411765
661	0	296	4	0	3,251908397
662	0	297	2	0	2,857142857
663	0	297	4	0	3,773584906
664	0	298	0	0	2,459627329
665	0	298	2	0	4,737179487
666	0	298	3	0	6,096
667	0	298	4	0	3,582677165
668	0	298	5	0	3,38028169
669	0	299	3	0	7,45
670	0	299	5	0	6,454545455
671	0	299	7	0	8,35443038
672	0	300	2	0	54,52941176
673	0	300	3	0	23,64285714
674	0	300	4	0	28,13333333
675	0	300	6	0	11,11428571
676	0	301	0	0	1,706521739
677	0	301	9	0	0,936
678	0	301	12	0	1,254385965
679	0	302	2	0	7,060606061
680	0	302	3	0	4,242236025
681	0	302	4	0	7,03125
682	0	303	2	0	2,810810811
683	0	304	2	0	6,745454545
684	0	305	3	0	3,19047619
685	0	305	4	0	2,240384615
686	0	306	1	0	8,702380952
687	0	307	1	1	10,12222222
688	0	307	3	1	19,05084746
689	0	307	4	1	17,85
690	0	308	1	1	6,071428571
691	0	308	2	1	9,057142857
692	0	309	1	1	11,10666667
693	0	309	2	1	7,423913043
694	0	309	3	1	8,765432099
695	0	309	3	1	9,486842105
696	0	309	4	1	8,869047619
697	0	310	1	0	9,257575758
698	0	310	3	0	5,357894737
699	0	310	4	0	3,834951456
700	0	311	2	0	8,028571429
701	0	311	3	0	7,064102564
702	0	311	4	0	5,142857143
703	0	312	2	0	7,76744186
704	0	312	3	0	7,307692308
705	0	313	2	0	1,638655462
706	0	313	3	0	1,672268908
707	0	313	4	0	1,820512821
708	0	314	2	0	3,110599078
709	0	314	3	0	2,659090909
710	0	314	4	0	2,452380952
711	0	315	2	1	13,77011494
712	0	316	2	0	1,746268657
715	0	318	1	0	1,711340206
716	0	318	2	0	2,03
717	0	318	4	0	2,871428571
718	0	318	7	0	4,736263736
719	0	318	9	0	4,277777778
720	0	319	2	1	19,46153846
721	0	319	3	1	17,10638298
722	0	319	4	1	11,77922078
723	0	319	5	1	12,25609756
724	0	319	6	1	9,67
725	0	319	9	1	11,25
726	0	319	10	1	8,725490196
727	0	319	11	1	9,144144144
728	0	319	12	1	6,558659218
729	0	319	13	1	9,616071429
730	0	320	0	1	18,75510204
731	0	321	0	0	14,67088608
732	0	321	3	0	3,155440415
733	0	322	0	0	5,307692308
734	0	322	1	0	3,428571429
735	0	323	0	0	2,842696629
736	0	323	4	0	1,869565217
737	0	324	3	0	0,859567901
738	0	325	2	0	1,122302158
739	0	326	0	1	30,64864865
740	0	326	1	1	13,64
741	0	326	2	1	37,86956522
742	0	326	3	1	16,72093023
743	0	326	4	1	18,86666667
744	0	327	1	0	16,30188679
745	0	328	2	1	17,92537313
746	0	328	3	1	13,96938776
747	0	329	0	0	12,26506024
748	0	329	1	0	11,62162162
749	0	329	2	0	7,725274725
750	0	329	3	0	7,177777778
751	0	330	0	0	15,95454545
752	0	331	8	1	7,326530612
753	0	331	9	1	7,192307692
754	0	331	10	1	10,80555556
755	0	331	11	1	7,844827586
756	0	331	14	1	8,417910448
757	0	331	15	1	8,337837838
758	0	331	16	1	5,228813559
759	0	331	17	1	6,342105263
760	0	331	18	1	6,712962963
761	0	332	0	1	6,614035088
762	0	332	0	1	13,18181818
763	0	333	5	1	3,861111111
764	0	333	6	1	2,964285714
765	0	333	7	1	2,774509804
766	0	334	2	0	5,103896104
767	0	334	3	0	5,296969697
768	0	335	10	1	6,564885496
769	0	335	11	1	3,693430657
770	0	335	12	1	3,964285714
771	0	335	13	1	7,128440367
772	0	335	14	1	3,183006536
773	0	335	19	1	3,746575342
774	0	335	20	1	3,986206897
775	0	335	21	1	2,166007905
776	0	336	1	1	4,395348837
777	0	337	0	0	15,82142857
778	0	338	3	0	5,1
779	0	339	0	0	5,8125
780	0	340	0	0	3,603833866
781	0	341	9	1	13,60810811
782	0	341	12	1	17,80519481
783	0	341	13	1	14,32894737
784	0	341	14	1	11,50632911
785	0	341	15	1	21,66101695
786	0	341	16	1	14,76388889
787	0	341	21	1	54,24
788	0	341	22	1	44,59183673
789	0	341	23	1	49,09615385
790	0	342	0	0	9,034482759
791	0	343	3	0	3,721153846
792	0	344	0	0	15,81578947
793	0	345	2	1	4,709090909
794	0	346	0	0	5,068965517
795	0	346	3	0	4,846153846
796	0	347	10	0	3,333333333
797	0	347	11	0	2,22972973
798	0	348	3	1	14,26666667
799	0	348	6	1	2,65
800	0	349	4	1	6,671328671
801	0	349	4	1	8,01754386
802	0	349	5	1	6,033333333
803	0	349	6	1	7,774193548
804	0	349	7	1	5,385416667
805	0	349	12	1	5,521568627
806	0	349	13	1	7,175531915
807	0	349	14	1	4,487179487
808	0	349	15	1	3,852631579
809	0	350	5	1	6,159090909
810	0	350	8	1	4,548387097
811	0	350	9	1	4,401574803
812	0	350	10	1	4,905797101
813	0	350	11	1	4,967320261
814	0	350	12	1	5,118881119
815	0	350	17	1	3,243093923
816	0	350	18	1	4,296511628
817	0	350	19	1	3,971098266
818	0	351	5	0	1,546511628
819	0	352	0	0	4,333333333
820	0	352	2	0	1,612903226
821	0	353	2	1	4,653225806
822	0	353	3	1	6,614457831
823	0	353	4	1	4,67
824	0	354	3	0	4,46835443
825	0	355	1	1	16,46938776
826	0	355	5	1	14,44
827	0	355	6	1	20,96774194
828	0	355	7	1	18,17647059
829	0	355	8	1	16,56818182
830	0	355	11	1	34,26666667
831	0	355	12	1	28,95
832	0	355	13	1	17,9787234
833	0	355	14	1	16,42
834	0	355	15	1	11,69230769
835	0	356	2	1	1,595959596
836	0	356	5	1	3,310810811
837	0	356	6	1	2,770833333
838	0	356	7	1	4,073684211
839	0	356	8	1	4,945652174
840	0	356	9	1	7,136363636
841	0	356	12	1	4,369565217
842	0	356	13	1	4,764227642
843	0	356	14	1	4,535211268
844	0	356	15	1	8,277310924
845	0	356	16	1	6,484126984
846	0	357	0	0	5,443181818
847	0	358	0	0	1,259911894
848	0	359	1	0	6,2
849	0	359	3	0	6,2
850	0	359	9	0	4,103448276
851	0	360	1	1	4,567567568
852	0	360	2	1	3,630573248
853	0	360	3	1	5,977941176
854	0	360	4	1	6,630769231
855	0	360	7	1	3,463157895
856	0	360	8	1	3,585253456
857	0	360	9	1	2,304347826
858	0	360	10	1	7,431506849
859	0	360	10	1	5,91011236
860	0	360	11	1	6,490196078
861	0	361	1	1	13,06451613
862	0	361	2	1	20,87096774
863	0	361	9	1	22,63636364
864	0	361	10	1	9,542372881
865	0	361	11	1	13,98
866	0	362	0	0	1,16969697
867	0	363	2	0	17,68292683
868	0	364	4	0	3,430894309
869	0	364	6	0	3,268292683
870	0	365	0	0	11,55102041
871	0	365	5	0	6,0125
872	0	365	6	0	4,828571429
873	0	365	7	0	3,925233645
874	0	365	8	0	5,583783784
875	0	365	9	0	6,265625
876	0	366	3	0	4,227272727
877	0	367	0	0	6,377777778
878	0	367	2	0	4,935672515
879	0	368	10	1	3,423076923
880	0	369	3	0	7,696428571
881	0	369	5	0	5,210526316
882	0	369	8	0	2,947368421
883	0	370	0	0	6,5625
884	0	371	0	0	1,716981132
885	0	372	5	0	5,222222222
886	0	373	0	0	5,942028986
887	0	374	0	0	21,35185185
888	0	375	0	0	10,02941176
889	0	375	2	0	11,85714286
890	0	375	6	0	9,782608696
891	0	376	0	0	2,603448276
892	0	376	0	0	2,046296296
893	0	377	0	1	8,109756098
894	0	377	1	1	13,58928571
895	0	377	2	1	24,91666667
896	0	377	5	1	6,142857143
897	0	377	6	1	4,797101449
898	0	377	7	1	4,900763359
899	0	377	8	1	4,294964029
900	0	377	9	1	5,885245902
901	0	378	0	1	9,935897436
902	0	378	2	1	12,91025641
903	0	378	3	1	12,8
904	0	378	6	1	13,59550562
905	0	378	7	1	15,93181818
906	0	378	8	1	13,88181818
907	0	378	9	1	16,43269231
908	0	378	10	1	12,45806452
909	0	379	0	0	2,351851852
910	0	380	0	0	2,061797753
911	0	381	2	0	4,266666667
912	0	382	2	1	5,625
913	0	383	4	0	3,636363636
914	0	384	1	1	4,99270073
915	0	384	2	1	7,85483871
916	0	384	5	1	4,546666667
917	0	384	6	1	3,572687225
918	0	384	7	1	4,602484472
919	0	384	8	1	2,975
920	0	384	8	1	2,527027027
921	0	385	1	1	11,8
922	0	386	0	0	4,430107527
923	0	386	1	0	4,914285714
924	0	387	4	0	3,037634409
925	0	388	1	0	6,962686567
926	0	389	2	0	6,659090909
927	0	389	6	0	4,698795181
928	0	390	2	0	10,89090909
929	0	390	6	0	6,489583333
930	0	390	10	0	8,336842105
931	0	391	0	1	41,65625
932	0	392	2	1	6,679487179
933	0	392	5	1	8,315789474
934	0	393	5	0	5,428571429
935	0	394	2	0	2,525
936	0	395	2	0	3,548780488
937	0	396	2	0	6,008
938	0	397	2	0	2,5
939	0	397	5	0	4,613636364
940	0	398	6	0	13,82716049
941	0	399	2	0	10,32222222
942	0	400	0	0	13,52173913
943	0	400	1	0	6,677966102
944	0	400	4	0	6,5
945	0	401	4	1	7,869565217
946	0	401	5	1	5,011111111
947	0	401	6	1	4,402061856
948	0	401	7	1	5,22
949	0	401	8	1	5,544715447
950	0	402	3	0	2,56
951	0	403	2	0	9,420560748
952	0	404	2	0	4,422535211
953	0	405	2	1	3,951219512
954	0	405	5	1	12,32911392
955	0	405	5	1	6,782051282
956	0	405	6	1	8,431818182
957	0	406	0	1	9,371428571
958	0	406	2	1	10,30120482
959	0	406	3	1	7,842105263
960	0	406	4	1	4,432748538
961	0	407	2	0	7,84
962	0	407	6	0	34,74074074
963	0	407	7	0	43,52380952
964	0	407	9	0	26,03448276
965	0	407	13	0	21,9787234
966	0	408	0	0	4,288461538
967	0	408	3	0	7
968	0	409	2	0	4,090909091
969	0	409	5	0	3,316176471
970	0	410	0	0	9,452830189
971	0	410	2	0	17,67567568
972	0	411	0	0	8,6
973	0	412	2	1	7,52173913
974	0	412	5	1	4,549019608
975	0	412	6	1	4,897435897
976	0	413	0	1	7,476190476
977	0	413	3	1	12,45762712
978	0	413	4	1	15,71186441
979	0	413	5	1	13,96
980	0	413	6	1	11,18333333
981	0	413	7	1	8,345679012
982	0	414	1	0	4,022222222
983	0	415	1	0	5,81372549
984	0	416	0	0	5,643678161
985	0	416	1	0	4,443298969
986	0	417	0	0	3,422413793
987	0	417	1	0	3,515837104
988	0	417	2	0	4,162790698
989	0	417	4	0	4,854748603
990	0	417	7	0	3,345360825
991	0	417	9	0	2,811320755
992	0	418	13	0	7,444444444
993	0	418	14	0	7,704225352
994	0	418	17	0	9,796296296
995	0	418	18	0	7,542372881
996	0	418	19	0	15,87179487
997	0	418	21	0	8,66
998	0	418	24	0	10,62745098
999	0	418	26	0	4,830882353
1000	0	419	0	0	4,012195122
1001	0	419	2	0	6,6
1002	0	419	3	0	4,873684211
1003	0	420	0	1	11,2962963
1004	0	420	1	1	4,946808511
1005	0	421	0	1	4,724409449
1006	0	421	0	1	8,909090909
1007	0	422	0	1	31,81578947
1008	0	422	1	1	28,18918919
1009	0	422	2	1	30,91891892
1010	0	423	0	1	14,3880597
1011	0	423	2	1	31,8
1012	0	423	4	1	22,45614035
1013	0	424	0	0	6,430555556
1014	0	424	1	0	5,6
1015	0	424	5	0	11,80701754
1016	0	424	7	0	14,19642857
1017	0	425	12	1	15,64705882
1018	0	426	0	1	3,134020619
1019	0	427	0	1	15,20588235
1020	0	427	1	1	12,72972973
1021	0	428	0	0	1,496503497
1022	0	428	3	0	5,148148148
1023	0	428	4	0	6,778846154
1024	0	428	6	0	2,631147541
1025	0	429	0	1	4,127906977
1026	0	429	1	1	1,708029197
1027	0	429	2	1	2,4375
1028	0	429	5	1	2,204918033
1029	0	429	8	1	4,471544715
1030	0	429	11	1	6,689922481
1031	0	430	1	1	12,50909091
1032	0	431	0	0	3,939759036
1033	0	432	0	0	20,35294118
1034	0	432	1	0	24,12987013
1035	0	432	3	0	5,240740741
1036	0	433	0	0	5,879518072
1037	0	433	1	0	4
1038	0	433	2	0	3,271604938
1039	0	434	0	0	11,68421053
1040	0	434	1	0	12,60869565
1041	0	434	3	0	9,672727273
1042	0	434	5	0	13,75409836
1043	0	434	7	0	11,8172043
1044	0	435	8	0	15,58823529
1045	0	435	11	0	7,390243902
1046	0	436	0	1	3,257352941
1047	0	437	0	1	7,960526316
1048	0	437	2	1	11,64615385
1049	0	438	0	0	1,754545455
1050	0	438	2	0	3,783783784
1051	0	438	4	0	3,666666667
1052	0	439	0	1	13,09259259
1053	0	439	2	1	7,058333333
1054	0	440	2	0	3,314285714
1055	0	441	0	0	7,421568627
1056	0	441	1	0	11,71641791
1057	0	441	3	0	4,80733945
1058	0	442	0	1	3,050847458
1059	0	442	1	1	2,070895522
1060	0	442	2	1	3,828125
1061	0	442	3	1	5,374384236
1062	0	442	6	1	8,497354497
1063	0	443	0	1	13,90625
1064	0	443	2	1	6,288888889
1065	0	443	4	1	6,377358491
1066	0	443	5	1	15,02439024
1067	0	444	0	1	4,073170732
1068	0	444	1	1	5,630136986
1069	0	445	0	0	2,93258427
1070	0	445	1	0	6,244897959
1071	0	445	6	0	3,797619048
1072	0	445	8	0	3,241071429
1073	0	445	10	0	2,738461538
1074	0	445	13	0	3,505050505
1075	0	446	2	1	2,202020202
1076	0	446	6	1	1,690140845
1077	0	446	8	1	2,670731707
1078	0	446	11	1	4,553719008
1079	0	446	18	1	4,627272727
1080	0	446	20	1	6,098214286
1081	0	447	1	0	12,36111111
1082	0	447	3	0	12
1083	0	447	6	0	8,15942029
1084	0	447	8	0	6,197674419
1085	0	447	10	0	7,98630137
1086	0	447	13	0	6,082191781
1087	0	448	0	0	8,783018868
1088	0	448	2	0	2,933333333
1089	0	449	0	0	13,94520548
1090	0	449	1	0	17,72972973
1091	0	449	4	0	10,9625
1092	0	449	6	0	10,07843137
1093	0	449	8	0	5,776315789
1094	0	450	0	0	21,45833333
1095	0	450	2	0	7,759493671
1096	0	450	3	0	8,86
1097	0	450	5	0	8,509259259
1098	0	451	0	0	5,391304348
1099	0	452	0	1	17,28846154
1100	0	453	0	1	10,35483871
1101	0	453	4	1	19,30612245
1102	0	453	6	1	23
1103	0	453	8	1	20,63414634
1104	0	454	7	0	7,530973451
1105	0	454	10	0	4,28342246
1106	0	455	0	1	4,459119497
1107	0	455	2	1	6,811764706
1108	0	455	4	1	14,7012987
1109	0	456	0	0	17,12244898
1110	0	456	4	0	4,042682927
1111	0	457	1	0	3,5
1112	0	457	3	0	4,56
1113	0	457	5	0	4,35
1114	0	457	8	0	6,088235294
1115	0	457	10	0	3,903225806
1116	0	457	12	0	3,609022556
1117	0	458	0	0	5,458823529
1118	0	458	1	0	3,355769231
1119	0	459	0	1	13,03921569
1120	0	460	0	1	3,8
1121	0	460	2	1	5,046875
1122	0	461	0	0	6,276595745
1123	0	461	3	0	8,092307692
1124	0	462	1	0	3,6
1125	0	463	0	1	7,825396825
1126	0	464	0	0	4,104166667
1127	0	464	1	0	3,503546099
1128	0	464	3	0	5,131578947
1129	0	465	0	0	9,8125
1130	0	465	3	0	3,474683544
1131	0	466	0	0	14,28888889
1132	0	467	0	0	4,957746479
1133	0	468	0	1	7,444444444
1134	0	468	1	1	6,530120482
1135	0	469	0	0	2,62
1136	0	469	1	0	1,62
1137	0	470	0	0	2,707792208
1138	0	471	0	0	3,911111111
1139	0	471	1	0	4,225490196
1140	0	471	4	0	6,032967033
1141	0	472	0	1	8,987096774
1143	0	472	11	1	25,62745098
1144	0	472	13	1	39,35849057
1145	0	473	0	1	6,359375
1146	0	473	1	1	2,922651934
1147	0	473	3	1	3,316091954
1148	0	474	3	0	4,28440367
1149	0	474	5	0	3,465116279
1150	0	475	0	1	4,606060606
1151	0	476	0	0	5,692307692
1152	0	476	1	0	7,224137931
1153	0	477	0	1	11,94545455
1154	0	477	4	1	17,97826087
1155	0	477	6	1	25,38636364
1156	0	477	8	1	31,6
1157	0	477	10	1	34,36
1158	0	478	0	0	4,238095238
1159	0	478	1	0	3,705128205
1160	0	478	4	0	2,847826087
1161	0	479	0	0	2,41221374
1162	0	479	2	0	3,276190476
1163	0	479	4	0	4,336538462
1164	0	479	7	0	2,472340426
1165	0	480	0	0	6,633333333
1166	0	480	1	0	5,715116279
1167	0	480	4	0	3,767857143
1168	0	480	6	0	4,018018018
1169	0	481	0	0	6,92248062
1170	0	482	0	0	7,329896907
1171	0	483	2	1	17,77358491
1172	0	484	0	0	5,030769231
1173	0	484	1	0	6,085106383
1174	0	485	0	0	5,565217391
1175	0	485	2	0	4,664179104
1176	0	485	5	0	16,34545455
1177	0	485	7	0	11,56976744
1178	0	485	9	0	11,04651163
1179	0	486	0	0	1,881118881
1180	0	486	3	0	2,919117647
1181	0	487	0	1	16,94936709
1182	0	487	1	1	29,04545455
1183	0	487	3	1	22,97916667
1184	0	487	5	1	44,6
1185	0	488	0	1	21,92592593
1186	0	488	2	1	18,05
1187	0	488	4	1	12,7
1188	0	488	7	1	16,88888889
1189	0	489	0	0	8,902912621
1190	0	489	4	0	3,861842105
1191	0	490	4	0	4,959016393
1192	0	490	7	0	1,733944954
1193	0	491	1	1	11,21428571
1194	0	491	2	1	10,07936508
1195	0	491	3	1	12,44827586
1196	0	491	6	1	7,46969697
1197	0	491	8	1	6,987341772
1198	0	491	10	1	5,476744186
1199	0	492	0	0	11,57894737
1200	0	492	1	0	7,138686131
1201	0	493	0	0	8,391891892
1202	0	493	1	0	1,72027972
1203	0	494	0	0	2,726415094
1204	0	494	2	0	3,416666667
1205	0	494	3	0	4,151515152
1206	0	495	0	1	25,89473684
1207	0	495	2	1	17,42857143
1208	0	495	4	1	27,42857143
1209	0	495	6	1	23,8
1210	0	495	6	1	20,11290323
1211	0	495	7	1	18
1212	0	496	0	1	7,876033058
1213	0	496	1	1	6,993288591
1214	0	497	9	1	6,452830189
1215	0	497	12	1	6,01754386
1216	0	498	0	0	4,258426966
1217	0	498	1	0	2,969387755
1218	0	498	3	0	6,782178218
1219	0	498	5	0	5,56122449
1220	0	499	0	0	5,823529412
1221	0	500	0	1	5,316455696
1222	0	500	1	1	4,053763441
1223	0	500	2	1	8,028985507
1224	0	500	4	1	12,38596491
1225	0	500	7	1	13,6091954
1226	0	500	9	1	16,61904762
1227	0	501	0	0	2,672268908
1228	0	501	4	0	2,794871795
1229	0	501	6	0	3,142857143
1230	0	501	8	0	3,783783784
1231	0	501	11	0	2,15625
1232	0	502	0	0	2,488188976
1233	0	503	0	1	8,304347826
1234	0	503	1	1	5,5
1235	0	504	0	0	20,7173913
1236	0	504	13	0	15,87931034
1237	0	504	15	0	10,64935065
1238	0	504	18	0	12,54411765
1239	0	505	0	0	4,620253165
1240	0	506	0	1	4,142857143
1241	0	506	2	1	6,074626866
1242	0	507	0	0	2,428571429
1243	0	507	7	0	7,782945736
1244	0	508	0	0	9,576923077
1245	0	509	0	0	2,283333333
1246	0	510	0	0	20,61363636
1247	0	510	2	0	18,82692308
1248	0	510	4	0	5,826086957
1249	0	510	7	0	6,532846715
1250	0	511	0	1	7,755813953
1251	0	511	1	1	14,15254237
1252	0	512	0	0	16,06451613
1253	0	512	1	0	13,32876712
1254	0	512	3	0	6,848484848
1255	0	512	5	0	7,463917526
1256	0	512	8	0	7,507352941
1257	0	512	12	0	4,942675159
1258	0	513	0	1	10,44680851
1259	0	513	1	1	3,164179104
1260	0	513	3	1	11,81081081
1261	0	514	0	1	15,45652174
1262	0	514	1	1	7,494382022
1263	0	514	3	1	8,980392157
1264	0	514	7	1	7,358024691
1265	0	514	10	1	7,288888889
1266	0	514	11	1	4,789915966
1267	0	514	14	1	4,159235669
1268	0	514	16	1	7,405063291
1269	0	515	1	0	8,418604651
1270	0	515	4	0	3,558441558
1271	0	516	0	0	3,923664122
1272	0	516	1	0	5,08411215
1273	0	516	2	0	3,10738255
1274	0	516	4	0	2,798657718
1275	0	516	7	0	2,831325301
1276	0	517	0	0	3,319587629
1277	0	517	1	0	2,413793103
1278	0	517	3	0	4,426470588
1279	0	517	5	0	3,252873563
1280	0	517	9	0	2,596899225
1281	0	517	10	0
1282	0	518	0	1	7,976744186
1283	0	519	0	0	3,671532847
1284	0	519	4	0	11,85897436
1285	0	519	6	0	7,103448276
1286	0	519	8	0	2,487288136
1287	0	520	0	0	4,922330097
1288	0	520	3	0	6,46875
1289	0	520	5	0	6,04494382
1290	0	520	8	0	4,053435115
1291	0	521	0	0	24,92307692
1292	0	522	0	0	10,91025641
1293	0	522	3	0	5,457142857
1294	0	523	0	0	2,672268908
1295	0	523	1	0	4,745098039
1296	0	524	0	1	8,555555556
1297	0	525	0	1	18,36363636
1298	0	525	1	1	15,24285714
1299	0	525	3	1	11,37096774
1300	0	526	0	0	5,465753425
1301	0	526	1	0	5,420560748
1302	0	527	0	0	1,779141104
1303	0	527	3	0	3,8625
1304	0	527	4	0	2,881889764
1305	0	527	6	0	3,725
1306	0	527	8	0	3,064516129
1307	0	527	11	0	3,104166667
1308	0	528	0	1	8,430232558
1309	0	528	2	1	10,13194444
1310	0	529	0	0	12,02
1311	0	529	3	0	10,63461538
1312	0	529	6	0	7
1313	0	529	8	0	4
1314	0	529	13	0	2,694444444
1315	0	530	0	1	7,106557377
1316	0	530	2	1	7,689655172
1317	0	530	8	1	10,85443038
1318	0	531	0	0	3,265822785
1319	0	532	0	0	7,428571429
1320	0	533	0	0	2,754545455
1321	0	533	1	0	2,795454545
1322	0	533	4	0	4,264957265
1323	0	533	6	0	5,444444444
1324	0	534	0	1	6,6
1325	0	534	2	1	5,565217391
1326	0	534	4	1	4,604651163
1327	0	534	5	1	6,081081081
1328	0	534	7	1	8,325581395
1329	0	535	0	1	8,571428571
1330	0	536	0	0	10,72727273
1331	0	536	2	0	10,09230769
1332	0	537	0	0	12,49090909
1333	0	537	2	0	6,882352941
1334	0	537	4	0	5,475728155
1335	0	537	7	0	2,779411765
1336	0	538	0	0	2,902097902
1337	0	539	0	0	3,89010989
1338	0	539	1	0	7,215686275
1339	0	539	3	0	5,027777778
1340	0	539	5	0	6,278481013
1341	0	540	0	0	15,86842105
1342	0	540	2	0	12,79069767
1343	0	540	4	0	5,568965517
1344	0	540	5	0	3,79389313
1345	0	541	0	1	2,156521739
1346	0	541	1	1	2,942528736
1347	0	542	0	0	4,478873239
1348	0	542	4	0	4,094594595
1349	0	543	0	0	2,380434783
1350	0	544	0	0	1,677777778
1351	0	544	1	0	1,255319149
1352	0	544	3	0	2,025862069
1353	0	544	4	0	4,756410256
1354	0	544	6	0	2,303030303
1355	0	545	0	0	7,394230769
1356	0	545	2	0	13,453125
1357	0	546	0	0	5,880597015
1358	0	547	0	1	6,798165138
1359	0	547	7	1	5,174825175
1360	0	547	7	1	5,841059603
1361	0	547	8	1	4,271676301
1362	0	547	9	1	3,591397849
1363	0	547	10	1	4,014354067
1364	0	547	11	1	2,877862595
1365	0	547	12	1	3,107142857
1366	0	547	13	1	2,484251969
1367	0	547	14	1	1,921052632
1368	0	547	15	1	2,044334975
1369	0	547	16	1	2,326180258
1370	0	548	0	1	7,308641975
1371	0	548	2	0	6,780701754
1372	0	549	0	0	4,492957746
1373	0	549	5	0	10,33333333
1374	0	549	9	0	7,526315789
1375	0	549	13	0	24,82758621
1376	0	549	15	0	24,26470588
1377	0	549	16	0	19,62857143
1378	0	549	19	0	24,82758621
1379	0	550	0	0	2,131386861
1380	0	551	0	0	6,675
1381	0	551	2	0
1382	0	551	6	0	6,044117647
1383	0	551	9	0	6,816091954
1384	0	552	0	0	1,316666667
1385	0	552	5	0	1,898876404
1386	0	552	7	0	3,38961039
1387	0	552	8	0	6,762711864
1388	0	553	0	0	3,567901235
1389	0	553	2	0	3,754385965
1390	0	554	0	1	16,48148148
1391	0	554	4	1	7,822580645
1392	0	554	5	1	7,324675325
1393	0	554	6	1	11,35772358
1394	0	554	7	1	9,622807018
1395	0	554	8	1	5,591194969
1396	0	554	9	1	4,101604278
1397	0	554	10	1	5,131979695
1398	0	554	11	1	5,385
1399	0	555	0	1	7,207792208
1400	0	555	3	1	4,88172043
1401	0	555	4	1	6,981481481
1402	0	555	5	1	7,619047619
1403	0	555	6	1	5,714285714
1404	0	555	7	1	7,591463415
1405	0	555	8	1	9,11875
1406	0	555	9	1	8,789473684
1407	0	555	10	1	13,30952381
1408	0	555	11	1	8,625
1409	0	555	12	1	7,005681818
1410	0	556	0	1	5,366666667
1411	0	556	4	1	14,13043478
1412	0	556	5	1	13,46376812
1413	0	556	6	1	36,67857143
1414	0	556	7	1	34
1415	0	556	8	1	30,85714286
1416	0	556	9	1	22,76923077
1417	0	556	10	1	7,921568627
1418	0	556	11	1	11,48484848
1419	0	556	12	1	11,85915493
1420	0	556	13	1	7,174311927
1421	0	557	0	1	3,74025974
1422	0	557	2	1	3,611111111
1423	0	558	0	1	4,226190476
1424	0	558	0	1	7,375
1425	0	558	1	1	4,602836879
1426	0	558	2	1	2,179347826
1427	0	558	3	1	2,63372093
1428	0	558	4	1	1,428571429
1429	0	558	4	1	3,02690583
1430	0	558	5	1	3,241758242
1431	0	558	6	1	3,773399015
1432	0	558	7	1	2,279527559
1433	0	558	8	1
1434	0	559	0	1	2,396039604
1435	0	559	0	1	2,265306122
1436	0	559	2	1	3,415841584
1437	0	559	2	1	7,365853659
1438	0	559	3	1	5,5
1439	0	559	4	1	7,205298013
1440	0	559	5	1	13,13636364
1441	0	559	6	1	10,28
1442	0	559	7	1	7,87654321
1443	0	559	8	1	4,797619048
1444	0	559	9	1
1445	0	560	0	1	76,62162162
1446	0	560	1	1	46,96491228
1447	0	560	2	1	40,47619048
1448	0	560	3	1	38,81818182
1449	0	560	4	1	34,37037037
1450	0	560	5	1	28,09638554
1451	0	560	6	1	23,09433962
1452	0	560	7	1	25,35
1453	0	560	8	1	28,1
1454	0	560	9	1	31,87142857
1455	0	560	10	1	21,33980583
1456	0	561	0	0	13,22580645
1457	0	561	1	0	7,916666667
1458	0	561	2	0	6,107526882
1459	0	561	7	0	2,064039409
1460	0	562	0	0	8,65
1461	0	562	3	0	4,568181818
1462	0	563	0	0	4,523809524
1463	0	563	1	0	3,298387097
1464	0	563	2	0	3,795081967
1465	0	564	0	0	3,145454545
1466	0	564	5	0	14,38461538
1467	0	564	7	0	7,127272727
1468	0	565	0	0	3,536082474
1469	0	565	2	0	4,568181818
1470	0	565	4	0	1,85026738
1471	0	565	7	0	2,696551724
1472	0	566	0	1	6,98245614
1473	0	566	2	1	7,975
1474	0	566	4	1	27,07476636
1475	0	566	5	1	18,64754098
1476	0	566	5	1	13,06185567
1477	0	566	5	1	11,34343434
1478	0	566	6	1	11,34615385
1479	0	566	7	1	14,12903226
1480	0	566	10	1	12,03508772
1481	0	566	11	1	12,16363636
1482	0	567	0	1	21,7027027
1483	0	567	4	1	8,230769231
1484	0	567	5	1	10,17391304
1485	0	567	6	1	10,29113924
1486	0	567	7	1	12,83606557
1487	0	567	8	1	13,37662338
1488	0	567	9	1	15,67142857
1489	0	567	10	1	11,62765957
1490	0	567	11	1	13,25225225
1491	0	567	12	1	9,402877698
1492	0	567	13	1	10,65413534
1493	0	568	0	0
1494	0	568	1	0	2,567307692
1495	0	569	0	0	1,912408759
1496	0	569	1	0	2,232142857
1497	0	569	1	0	2,226086957
1498	0	570	0	0	3,286624204
1499	0	570	1	0	4,870967742
1500	0	570	3	0	2,707317073
1501	0	571	0	0	7,488095238
1502	0	571	1	0	4,203389831
1503	0	571	2	0	4,74
1504	0	571	3	0	5,475247525
1505	0	572	0	1	8,535714286
1506	0	572	1	1	4,302325581
1507	0	573	4	1	24,08510638
1508	0	574	2	0	4,558823529
1509	0	574	4	0	10,66666667
1510	0	574	6	0	16,1875
1511	0	574	11	0	21,11764706
1512	0	574	13	0	17,05555556
1513	0	574	15	0	20,3125
1514	0	574	17	0	17
1515	0	575	4	0	8,515151515
1516	0	576	13	0	2,322580645
1517	0	577	5	1	6,877358491
1518	0	577	7	1	14,12987013
1519	0	577	10	1	9,363636364
1520	0	578	4	0	2,841584158
1521	0	579	5	0	4,811764706
1522	0	579	9	0	3,276190476
1523	0	579	11	0	4,233009709
1524	0	579	13	0	3,708661417
1525	0	579	16	0	3,384615385
1526	0	580	0	1	3,413793103
1527	0	580	5	1	9,746835443
1528	0	581	2	1	7,197368421
1529	0	581	4	1	14,32352941
1530	0	581	7	1	11
1531	0	581	9	1	14,41463415
1532	0	581	11	1	16,36666667
1533	0	581	14	1	16,22916667
1534	0	582	1	1	7,091549296
1535	0	582	3	1	11,22727273
1536	0	582	4	1	6,12987013
1537	0	582	6	1	8,020833333
1538	0	582	8	1	15,47058824
1539	0	583	1	1	2,739130435
1540	0	583	2	1	7,134615385
1541	0	583	3	1	10,74074074
1542	0	583	5	1	5,244444444
1543	0	583	8	1	9,120689655
1544	0	583	10	1	12,19047619
1545	0	583	10	1	5,742857143
1546	0	583	12	1	7,246575342
1547	0	583	15	1	13,5862069
1548	0	584	1	0	4,081081081
1549	0	584	6	0	5,151515152
1550	0	584	9	0	2,842857143
1551	0	584	13	0	2,346491228
1552	0	585	1	0	4
1553	0	585	3	0	7,302325581
1554	0	585	5	0	5,737704918
1555	0	586	0	0	2,10880829
1556	0	586	2	0	2,722580645
1557	0	587	0	1	6,62962963
1558	0	587	2	1	12,5862069
1559	0	587	4	1	15,09090909
1560	0	587	5	1	18
1561	0	587	7	1	16,54545455
1562	0	587	9	1	22,19230769
1563	0	587	12	1	12,53571429
1564	0	588	1	0	8,705882353
1565	0	588	3	0	3,735849057
1566	0	589	1	0	4,306666667
1567	0	589	3	0	4,184210526
1568	0	590	1	0	3,026785714
1569	0	590	2	0	2,5
1570	0	590	5	0	3,490384615
1571	0	590	7	0	3,265060241
1572	0	591	0	0	4,822429907
1573	0	591	1	0	5,075471698
1574	0	591	2	0	8,119047619
1575	0	591	4	0	4,809160305
1576	0	592	0	0	3,274509804
1577	0	592	5	0	15,10526316
1578	0	592	7	0	12,25714286
1579	0	592	9	0	13,60869565
1580	0	592	11	0	11,58
1581	0	593	0	0	4,229508197
1582	0	593	3	0	4,375
1583	0	594	1	1	3,453333333
1584	0	594	2	1	3,155844156
1585	0	594	5	1	5,449275362
1586	0	594	5	1	4,85
1587	0	594	7	1	11,42857143
1588	0	594	9	1	5,014492754
1589	0	594	12	1	5,627906977
1590	0	595	0	0	2,547008547
1591	0	595	2	0	4,281553398
1592	0	596	0	0	5,666666667
1593	0	596	8	0	5,24137931
1594	0	596	9	0	7,216216216
1595	0	597	0	1	4,722222222
1596	0	597	2	1	8,987179487
1597	0	598	0	0	6,170731707
1598	0	598	2	0	3,886075949
1599	0	599	0	0	11,3880597
1600	0	599	1	0	11,48275862
1601	0	599	2	0	7,506666667
1602	0	599	4	0	8,175675676
1603	0	599	6	0	5,291262136
1604	0	599	8	0	2,940740741
1605	0	599	9	0	3,2
1606	0	599	11	0	2,716216216
1607	0	600	0	0	10,51219512
1608	0	600	1	0	9,235294118
1609	0	600	3	0	5,835820896
1610	0	601	0	0	5,634615385
1611	0	601	2	0	7,333333333
1612	0	601	4	0	1,857142857
1613	0	602	1	0	7,028169014
1614	0	602	3	0	5,607142857
1615	0	602	4	0	7,962264151
1616	0	602	6	0	5,337662338
1617	0	602	8	0	7,024691358
1618	0	602	10	0	6,14159292
1619	0	603	2	1	2,884615385
1620	0	603	4	1	2,118181818
1621	0	603	6	1	4,833333333
1622	0	603	7	1	12,25
1623	0	603	8	1	6,936507937
1624	0	603	9	1	4,21
1625	0	603	10	1	6,511111111
1626	0	603	11	1	4,292035398
1627	0	604	0	1	9,322580645
1628	0	604	3	1	3,658536585
1629	0	604	5	1	4,020618557
1630	0	604	7	1	4,372093023
1631	0	605	1	1
1632	0	605	4	1	2,744186047
1633	0	605	7	1	7,666666667
1634	0	605	9	1	7,7375
1635	0	606	1	0	6,285714286
1636	0	606	2	0	9,285714286
1637	0	607	0	0	4,066666667
1638	0	607	1	0	3,684210526
1639	0	607	2	0	3,828571429
1640	0	607	4	0	5,534246575
1641	0	607	6	0	5,564705882
1642	0	607	8	0	3,738095238
1643	0	608	0	1	17,83333333
1644	0	608	2	1	16,73809524
1645	0	608	4	1	37,51851852
1646	0	609	0	1	12,39506173
1647	0	609	1	1	9,777777778
1648	0	609	3	1	14,28205128
1649	0	609	5	1	29,5
1650	0	609	5	1	22,88888889
1651	0	610	0	1	2,711864407
1652	0	610	2	1	3,46
1653	0	610	4	1	7,545454545
1654	0	610	5	1	15,61538462
1655	0	610	7	1	17,09677419
1656	0	610	10	1	7,422619048
1657	0	611	0	0	3,969387755
1658	0	611	2	0	5,418181818
1659	0	612	0	0	5,736263736
1660	0	612	2	0	8,103448276
1661	0	612	4	0	7,644067797
1662	0	613	0	1	12,17857143
1663	0	613	1	1	48,5
1664	0	613	6	1	40,66666667
1665	0	613	9	1	36,77272727
1666	0	614	0	0	11,70149254
1667	0	614	8	0	5,278145695
1668	0	614	10	0	4,453703704
1669	0	614	12	0	5,112903226
1670	0	614	14	0	6,175
1671	0	614	16	0	4,169491525
1672	0	614	18	0	8,116883117
1673	0	615	1	0	12,78125
1674	0	615	2	0	15,72580645
1675	0	615	4	0	7,266666667
1676	0	616	1	1	3,103030303
1677	0	616	3	1	3,015625
1678	0	616	4	1	2,861313869
1679	0	616	6	1	4,97080292
1680	0	617	0	1	7,182926829
1681	0	617	1	1	2,438848921
1682	0	617	3	1	8,390625
1683	0	617	5	1	9,788235294
1684	0	618	2	0	8,355555556
1685	0	618	4	0	8,811320755
1686	0	618	6	0	7,03030303
1687	0	618	8	0	4,922330097
1688	0	619	2	0	6,360655738
1689	0	619	4	0	7,285714286
1690	0	620	3	1	35,65384615
1691	0	620	3	1	33,72413793
1692	0	620	5	1	20,92857143
1693	0	620	8	1	35,35714286
1694	0	621	2	1	11,42372881
1695	0	622	0	0	12,29411765
1696	0	622	5	0	9,144927536
1697	0	623	0	0	5,814814815
1698	0	623	2	0	1,935483871
1699	0	623	4	0	0,9
1700	0	623	6	0	2,114754098
1701	0	624	0	1	18,19047619
1702	0	624	1	1	9,530612245
1703	0	624	3	1	10,92941176
1704	0	625	0	1	4,693877551
1705	0	625	2	1	13,48275862
1706	0	625	3	1	11,07894737
1707	0	625	4	1	16,56923077
1708	0	625	7	1	21,51578947
1710	0	627	0	0	7,95
1711	0	627	1	0
1712	0	627	3	0	3,957446809
1713	0	627	5	0	12,77272727
1714	0	628	0	0	6,948275862
1715	0	628	1	0	7,46969697
1716	0	628	3	0	10,31578947
1717	0	629	0	0	5,393442623
1718	0	629	1	0	7,75862069
1719	0	629	5	0	5,64556962
1720	0	630	0	0	10,27
1721	0	630	1	0	13,875
1722	0	630	3	0	6,543209877
1723	0	631	0	0	0,756613757
1724	0	631	2	0	2,676258993
1725	0	631	4	0	1,205405405
1726	0	631	6	0	1,679144385
1727	0	632	0	0	4,880597015
1728	0	632	2	0	3,904109589
1729	0	632	4	0	6,631578947
1730	0	632	6	0	9,169491525
1731	0	633	0	0	3,643835616
1732	0	633	3	0	5,931818182
1733	0	633	5	0	5,318681319
1734	0	633	7	0	5,446428571
1735	0	634	0	1	6,123076923
1736	0	634	2	1	8,050632911
1737	0	634	5	1	12,86764706
1738	0	634	8	1	21,37142857
1739	0	635	0	0	3,052631579
1740	0	635	5	0	3,897058824
1741	0	635	6	0	6,639175258
1742	0	636	0	0	10,28846154
1743	0	636	1	0	11,64285714
1744	0	636	3	0	9,609756098
1745	0	636	5	0	6,852459016
1746	0	637	0	0	1,348547718
1747	0	637	2	0	1,268240343
1748	0	637	4	0	1,090047393
1749	0	638	0	0	4,5
1750	0	638	2	0	4,768518519
1751	0	639	0	0	2,19379845
1752	0	639	1	0	4
1753	0	639	3	0	2,595238095
1754	0	640	0	1	3,693069307
1755	0	640	2	1	4,409090909
1756	0	640	6	1	13,09722222
1757	0	640	8	1	9,56424581
1758	0	641	0	1	8,381443299
1759	0	641	1	1	10,48913043
1760	0	642	0	0	3,161616162
1761	0	642	5	0	1,523178808
1762	0	642	7	0	1,81300813
1763	0	643	0	0	16,23529412
1764	0	643	1	0	13,41176471
1765	0	643	3	0	12,08333333
1766	0	643	5	0	16,28125
1767	0	643	7	0	22,50819672
1768	0	644	0	0	5,610062893
1769	0	644	1	0	2,452380952
1770	0	645	0	0	3,015873016
1771	0	645	9	0	9,428571429
1772	0	645	13	0	6,15
1773	0	646	0	1	7,822222222
1774	0	646	2	1	23,55555556
1775	0	646	6	1	17,39215686
1776	0	647	0	1	5,491666667
1777	0	647	2	1	12,36065574
1778	0	648	0	0	2,67032967
1779	0	649	0	0	3,903614458
1780	0	649	1	0	7,407407407
1781	0	649	3	0	2,6125
1782	0	649	6	0	16,3
1783	0	650	2	1	6,052631579
1784	0	651	10	0	2,503937008
1785	0	651	13	0	3,757281553
1786	0	651	16	0	5,909090909
1787	0	652	0	0	3,378787879
1788	0	652	2	0	4,983333333
1789	0	652	3	0	11,07692308
1790	0	652	5	0	12,3
1791	0	653	0	1	9,913043478
1792	0	653	2	1	11,48484848
1793	0	653	5	1	19
1794	0	654	0	0	7,153846154
1795	0	654	2	0	2,054054054
1796	0	655	0	0	5,883116883
1797	0	655	2	0	3,394230769
1798	0	656	0	0	2,421686747
1799	0	656	2	0	2,02189781
1800	0	656	3	0	1,4875
1801	0	657	0	0	10,18181818
1802	0	657	2	0	10,08333333
1803	0	658	0	0	2,966101695
1804	0	658	1	0	3,444444444
1805	0	658	3	0	9,402439024
1806	0	658	5	0	10,42857143
1807	0	659	0	1	7,112676056
1808	0	659	4	1	4,6171875
1809	0	660	0	0	9,170454545
1810	0	660	2	0	5,130434783
1811	0	661	0	0	4,16
1812	0	661	2	0	6,626865672
1813	0	662	0	0	1,957446809
1814	0	662	1	0	1,210526316
1815	0	662	3	0	2,237288136
1816	0	663	0	1	7,297142857
1817	0	663	2	1	9,330708661
1818	0	663	4	1	10,24761905
1819	0	664	0	0	3,372340426
1820	0	664	2	0	4,472972973
1821	0	665	0	0	2,878787879
1822	0	665	1	0	10,75925926
1823	0	665	2	0	7,424657534
1824	0	665	4	0	10,24242424
1825	0	665	5	0	12,85294118
1826	0	666	0	1	28,14705882
1827	0	666	2	1	21,40625
1828	0	666	4	1
1829	0	666	6	1	16,59090909
1830	0	667	0	0	13,57407407
1831	0	668	5	1	3,321917808
1832	0	669	4	0	12,41304348
1833	0	670	0	0	4,85
1834	0	670	3	0	6,075949367
1835	0	671	0	0	7,47826087
1836	0	672	0	1	6,586666667
1837	0	672	1	1	6,472222222
1838	0	672	3	1	13,73333333
1839	0	673	0	0	2,168141593
1840	0	673	3	0	3,401639344
1841	0	674	0	1	11,09782609
1842	0	674	3	1	11,97560976
1843	0	675	0	0	15,36538462
1844	0	676	0	1	0,2
1845	0	676	1	1	0,225225225
1846	0	676	3	1	0,300813008
1847	0	677	0	1	3,5375
1848	0	677	2	1	5,293650794
1849	0	677	4	1	5,391304348
1850	0	678	0	1	5,875
1851	0	678	1	1	12,19298246
1852	0	678	3	1	8,85
1853	0	679	0	0	2,647058824
1854	0	679	2	0	1,891428571
1855	0	680	0	0	43,05128205
1856	0	680	2	0	16,4
1857	0	681	0	0	3,951807229
1858	0	681	2	0	2,3515625
1859	0	682	0	0	13,00961538
1860	0	682	1	0	12,875
1861	0	682	3	0	4,209302326
1862	0	683	0	0	2,636363636
1863	0	683	5	0	2,120253165
1864	0	683	6	0	1,24137931
1865	0	683	7	0	1,311881188
1866	0	684	0	0	11,85714286
1867	0	684	3	0	9,266666667
1868	0	685	0	1	6,701298701
1869	0	685	1	1	10,58208955
1870	0	685	3	1	14,67647059
1871	0	686	0	1	4,531914894
1872	0	686	1	1	5,06779661
1873	0	686	2	1	11,86746988
1874	0	686	4	1	20,68493151
1875	0	687	0	1	9,365217391
1876	0	687	3	1	13,05357143
1877	0	688	0	0	8,692307692
1878	0	688	1	0	6,76056338
1879	0	689	1	0	7,893617021
1880	0	689	3	0	4,34
1881	0	690	0	1	5,540540541
1882	0	690	2	1	4,320512821
1883	0	691	1	0	1,431372549
1884	0	691	2	0	2,584158416
1885	0	692	0	0	2,429577465
1886	0	692	2	0	4,455696203
1887	0	693	0	1	3,06504065
1888	0	693	3	1	11,1875
1889	0	694	0	0	3,355140187
1890	0	694	1	0	3,857954545
1891	0	694	3	0	2,075697211
1892	0	695	3	1	39,44444444
1893	0	695	4	1	32,95
1894	0	695	5	1	27,48076923
1895	0	695	6	1	18,19402985
1896	0	695	7	1	27,45238095
1897	0	696	3	1	7,608695652
1898	0	696	3	1	10,04545455
1899	0	696	3	1	5,22962963
1900	0	696	3	1	17,66019417
1901	0	696	20	1	5,938271605
1902	0	696	21	1	5,264705882
1903	0	696	22	1	5,030612245
1904	0	696	23	1	4,493975904
1905	0	696	24	1	4,37654321
1906	0	697	2	0
1907	0	697	3	0
1908	0	698	20	1	2,75862069
1909	0	698	21	1	3,111111111
1910	0	698	22	1	6,31
1911	0	698	23	1	3,444444444
1912	0	698	24	1	2,983471074
1913	0	698	25	1	2,835051546
1914	0	698	26	1	2,743362832
1916	0	700	0	0	7,492957746
1928	0	703	2	1	7,385245902
1929	0	703	3	1	8,56779661
1930	0	703	4	1	13,12295082
1931	0	703	5	1	14,51546392
1932	0	703	6	1	13,65454545
1933	0	703	7	1	11,51304348
1934	0	703	8	1	10,99275362
1935	0	704	2	1	5,568627451
1936	0	704	3	1	6,203252033
1937	0	704	4	1	3,408759124
1938	0	704	5	1	2,229166667
1939	0	704	6	1	2,118811881
1940	0	704	7	1	3,209876543
1941	0	704	8	1	2,689320388
1942	0	705	1	1	8,225352113
1943	0	705	3	1	7,348993289
1944	0	705	4	1	6,461038961
1945	0	705	5	1	5,74863388
1946	0	705	6	1	6,335329341
1947	0	706	5	0
1948	0	707	3	0	3,169014085
1949	0	707	5	0
1950	0	708	0	0	7,284313725
1951	0	709	0	1	16,29411765
1952	0	709	1	1	13,25
1953	0	709	2	1	4,925925926
1954	0	709	3	1	5,888888889
1955	0	709	4	1	6,486842105
1956	0	710	1	1	6,25
1957	0	710	1	1	10,28915663
1958	0	710	2	1	15,12280702
1959	0	710	4	1	11,06122449
1960	0	711	3	1	14,63829787
1961	0	711	3	1	10,75555556
1962	0	711	4	1	9,317460317
1963	0	712	0	1	3,79
1964	0	712	1	1	3,244094488
1965	0	712	2	1	5,826086957
1966	0	712	3	1	8,615384615
1967	0	712	4	1	9,095890411
1968	0	713	0	0	4,663043478
1969	0	714	3	0	5,348314607
1970	0	715	1	0	8,755681818
1971	0	716	3	0	3,258823529
1972	0	717	0	1	12,95876289
1973	0	717	0	1	21,93220339
1974	0	717	1	1	22,53225806
1975	0	717	2	1	8,906976744
1976	0	718	0	1	11,65714286
1977	0	718	1	1	14,63541667
1978	0	718	2	1	11,19327731
1979	0	719	0	0	4,2
1980	0	720	0	0	3,233333333
1981	0	721	0	1	8,154320988
1982	0	721	1	1	6,732984293
1983	0	722	0	0	6,373626374
1984	0	723	0	1	19,4375
1985	0	723	1	1	18,71641791
1986	0	724	1	1	4,183333333
1987	0	724	1	1	4,693548387
1988	0	725	0	1	3,535714286
1989	0	726	0	1	6,632
1991	0	728	0	0	2,292682927
1992	0	729	0	1	3,444444444
1993	0	729	0	1	3,677966102
1994	0	730	0	1	11,859375
1995	0	730	1	1	5,909090909
1996	0	730	2	1	6,239583333
1997	0	730	3	1	6,341772152
1998	0	730	4	1	7,846153846
1999	0	731	1	0	2,887850467
2000	0	732	0	0	4,554054054
2001	0	733	0	1	3,3625
2002	0	734	0	0	1,359550562
2003	0	735	4	1	8,361702128
2004	0	735	4	1	8,254545455
2005	0	735	5	1	7,317073171
2006	0	735	6	1	11,33333333
2007	0	735	7	1	11,98734177
2008	0	735	8	1	15,42622951
2009	0	735	9	1	10,10989011
2010	0	736	0	0	2,93006993
2011	0	737	0	1	5,607142857
2012	0	737	1	1	3,736842105
2013	0	737	2	1	5,346534653
2014	0	738	0	0	1,568421053
2015	0	739	2	1
2016	0	739	4	1
2017	0	740	1	0	3,6875
2018	0	740	2	0	3,660550459
[truncated: 589 more rows]
