# Supplementary material for: A novel haemocytometric COVID-19 prognostic score developed and validated in an observational multicentre European hospital-based study
Source: eLife journal article supplement (doi:10.7554/elife.63195), 2020-11-26
Supplement: supp [file elife-63195-supp-v1.zip › elife_poa_e63195_Figure_3_source_data_3.csv]

Figure 3 � source data file 3. Source data for trends of AS-LYMPH%/L over 14 days of hospitalisation in critical/fatal (CF) and non-critical (NC) patients
Filename	exclusion	Pat_ID	length_of_hospitalisation	Critical_or_Fatal	AS-LYMP%L(%)
1	0	1	0	1	2,459016393
2	0	1	2	1	3,448275862
3	0	1	2	1	2,586206897
4	0	1	3	1	3
5	0	1	4	1	4,310344828
6	0	1	15	1	2,702702703
7	0	2	0	0	6,18556701
8	0	2	1	0	4,964539007
9	0	2	2	0	3,125
10	0	2	3	0	2,285714286
11	0	2	4	0	1,421800948
12	0	2	6	0	0,473933649
13	0	3	0	1	4,054054054
14	0	3	1	1	5,714285714
15	0	3	1	1	2,702702703
16	0	3	2	1	5,333333333
17	0	3	3	1	7,692307692
18	0	3	4	1	10,44776119
19	0	3	4	1	9,677419355
20	0	3	5	1	9,722222222
21	0	3	6	1	6,666666667
22	0	3	7	1	4,301075269
23	0	3	8	1	3,603603604
24	0	3	9	1	3,184713376
25	0	3	10	1	2,083333333
26	0	3	11	1	1,418439716
27	0	3	12	1	0,99009901
28	0	3	13	1	1,612903226
29	0	4	0	1	0
30	0	4	1	1	4,761904762
31	0	4	1	1	0
32	0	4	2	1	0
33	0	4	3	1	0
34	0	4	4	1	0
35	0	4	5	1	10
36	0	4	6	1	6,896551724
37	0	4	7	1	7,317073171
38	0	4	8	1	29,26829268
39	0	4	9	1	36,11111111
40	0	4	10	1	27,83505155
41	0	4	10	1	26,66666667
42	0	4	11	1	16
43	0	4	12	1	6,481481481
44	0	4	13	1	4,444444444
45	0	4	14	1	5,22875817
46	0	5	0	0	0
47	0	5	1	0	0
48	0	6	0	0	9,85915493
49	0	6	2	0	10,34482759
50	0	6	3	0	8,571428571
51	0	6	5	0	10,25641026
52	0	7	0	0	6,923076923
53	0	7	2	0	4,232804233
54	0	7	3	0	8,695652174
55	0	7	4	0	8,092485549
56	0	7	5	0	4,093567251
57	0	7	6	0	2,380952381
58	0	8	1	0	1,265822785
59	0	9	0	0	2
60	0	9	2	0
61	0	9	3	0	3,448275862
62	0	9	4	0	3,846153846
63	0	9	5	0	4,761904762
64	0	9	7	0	3,846153846
65	0	10	0	1	5,555555556
66	0	10	1	1	3,03030303
67	0	10	3	1	0
68	0	10	4	1	11,11111111
69	0	11	0	0	0
70	0	11	1	0	0
71	0	11	3	0	2,02020202
72	0	12	0	1	0
73	0	12	2	1	1,470588235
74	0	13	5	1	3,012048193
75	0	13	6	1	2,409638554
76	0	13	7	1	2,298850575
77	0	13	8	1	1,587301587
78	0	13	9	1	1,470588235
79	0	13	9	1	2,097902098
80	0	13	10	1	1,986754967
81	0	13	11	1	1,704545455
82	0	13	12	1	1,382488479
83	0	13	13	1	1,724137931
84	0	14	1	0	0,724637681
85	0	15	13	1	2,272727273
86	0	15	14	1	2,45398773
87	0	15	15	1	1,904761905
88	0	15	16	1	2,631578947
89	0	15	17	1	3,097345133
90	0	15	18	1	2,985074627
91	0	15	19	1	1,992031873
92	0	15	20	1	1,746724891
93	0	16	11	1	2,941176471
94	0	16	12	1	4,705882353
95	0	16	13	1	11,9047619
96	0	16	14	1	8,333333333
97	0	16	15	1	7,258064516
98	0	16	16	1	12,82051282
99	0	16	17	1	16,32653061
100	0	16	18	1	7,407407407
101	0	16	19	1	5,714285714
102	0	17	1	0
103	0	17	2	0	2,127659574
104	0	17	4	0	2,702702703
105	0	18	0	1	3,703703704
106	0	18	2	1	1,265822785
107	0	18	2	1	3,448275862
108	0	18	3	1	10,52631579
109	0	18	4	1	7,462686567
110	0	19	0	1	2,777777778
111	0	19	1	1	2,877697842
112	0	19	3	1	3,184713376
113	0	20	0	0	2,127659574
114	0	20	1	0	1,418439716
115	0	20	3	0	2,678571429
116	0	21	0	1	1,219512195
117	0	22	0	0	0,884955752
118	0	23	0	0	6,666666667
119	0	24	0	0	2,083333333
120	0	25	0	1	2,325581395
121	0	26	0	0	3,125
122	0	27	0	0	1,111111111
123	0	28	0	0	0,595238095
124	0	29	0	0	6,741573034
125	0	30	0	1
126	0	30	4	1	1,162790698
127	0	31	0	0	17,64705882
128	0	32	0	1	3,846153846
129	0	33	0	1	1,388888889
130	0	34	0	1
131	0	35	0	0	3,149606299
132	0	36	0	1	0,787401575
133	0	37	0	0	2,272727273
134	0	38	0	1	4,347826087
135	0	39	0	0	8,695652174
136	0	40	0	0	1,123595506
137	0	41	0	0	2,34375
138	0	42	0	0	1,960784314
139	0	43	0	0	4,938271605
140	0	44	0	0	0
141	0	45	0	1	22,89156627
142	0	45	1	1
143	0	45	1	1
144	0	45	2	1	9,615384615
145	0	45	3	1
146	0	45	4	1	6,976744186
147	0	45	5	1	4
148	0	45	5	1
149	0	45	6	1	3,50877193
150	0	45	6	1
151	0	45	7	1	3,614457831
152	0	45	7	1
153	0	45	8	1	5,405405405
154	0	45	9	1	6,578947368
155	0	45	10	1	7,317073171
156	0	45	11	1	7,142857143
157	0	45	12	1	7,407407407
158	0	45	13	1	8
159	0	45	14	1	8,843537415
160	0	45	15	1	5,298013245
161	0	45	16	1	5,555555556
162	0	45	17	1	6,015037594
163	0	45	18	1	3,947368421
164	0	45	19	1	4,255319149
165	0	45	20	1	3,703703704
166	0	45	21	1	4,191616766
167	0	45	22	1	4,242424242
168	0	46	0	0	2,173913043
169	0	47	0	0	1,449275362
170	0	48	0	1	5,263157895
171	0	49	0	1
172	0	50	0	0	0
173	0	51	0	0	5
174	0	52	0	1	0
175	0	53	0	1	0
176	0	54	0	1	5
177	0	54	4	1	8,695652174
178	0	54	10	1	12,06896552
179	0	54	11	1	6,557377049
180	0	55	0	0	1,941747573
181	0	56	0	1	10,46511628
182	0	57	0	0	0
183	0	58	0	0	2
184	0	59	0	0	1,57480315
185	0	60	0	0	4,838709677
186	0	61	0	0	7,194244604
187	0	62	0	1	3,896103896
188	0	63	0	0	4,464285714
189	0	64	0	0	1,098901099
190	0	65	0	0
191	0	66	0	1	1,5625
192	0	67	0	0
193	0	68	0	0	6,060606061
194	0	69	0	0	3,846153846
195	0	70	0	0	2,5
196	0	71	0	0	2,272727273
197	0	72	0	0	1,666666667
198	0	73	0	0	3,225806452
199	0	74	0	0	3,191489362
200	0	75	0	0	2,5
201	0	76	0	0
202	0	77	0	0	1,265822785
203	0	78	0	1	9,090909091
204	0	79	0	0	1,351351351
205	0	79	0	0
206	0	79	1	0
207	0	79	2	0
208	0	79	3	0	1,503759398
209	0	79	5	0	0,746268657
210	0	79	7	0
211	0	79	8	0	2,586206897
212	0	79	9	0
213	0	79	10	0	1,052631579
214	0	79	12	0	1,075268817
215	0	80	0	0	6,12244898
216	0	81	0	1	0
217	0	82	0	0	6,25
218	0	83	0	0	1,111111111
220	0	85	0	1	0
221	0	86	0	1	5,063291139
222	0	87	0	0	1,724137931
223	0	88	0	0	1,621621622
225	0	90	0	0	0
226	0	91	0	0	15,25423729
227	0	92	0	0	3,03030303
228	0	93	0	1	6,52173913
229	0	93	1	1
230	0	93	2	1	13,23529412
231	0	94	0	0	3,2
232	0	95	0	0	5,729166667
233	0	96	0	1	2,702702703
234	0	97	0	0	3,333333333
235	0	98	0	0	3,370786517
236	0	98	2	0	5,607476636
237	0	98	4	0
238	0	98	5	0
239	0	98	13	0	1,910828025
240	0	99	0	1	3,846153846
241	0	99	1	1	1,986754967
242	0	99	2	1
243	0	99	3	1
244	0	99	4	1
245	0	99	5	1
246	0	100	0	1	2,739726027
247	0	101	0	1	5
248	0	102	0	0	9,677419355
249	0	103	0	1	3,703703704
250	0	103	1	1	2,222222222
251	0	104	0	1	8,108108108
252	0	105	0	0	8,045977011
253	0	106	0	1	2,380952381
254	0	107	0	0	0
255	0	108	0	0	2,97029703
256	0	109	0	1	5,208333333
257	0	110	0	0	5
258	0	110	1	0
259	0	110	2	0
260	0	110	3	0
261	0	110	4	0
262	0	110	5	0
263	0	110	6	0
264	0	110	7	0
265	0	110	7	0
266	0	110	8	0	3,225806452
267	0	110	9	0	3,278688525
268	0	110	10	0	1,639344262
269	0	110	11	0	1,57480315
270	0	110	12	0	2,777777778
271	0	110	13	0	2,75862069
272	0	110	16	0	1,129943503
273	0	110	17	0	1,25
274	0	110	20	0	0,970873786
275	0	111	0	0	6,25
276	0	112	0	0	5,050505051
277	0	113	0	0	4,081632653
278	0	114	0	1	1,333333333
279	0	115	0	1	7,086614173
280	0	116	0	1	1,935483871
281	0	117	0	0	1,219512195
282	0	118	0	1	5,660377358
283	0	119	0	1	20
284	0	120	0	1	5,405405405
285	0	121	0	1	0
286	0	122	0	0	5,263157895
287	0	122	4	0
288	0	122	7	0
289	0	122	9	0
290	0	123	0	1	9,77443609
291	0	124	0	0	9,345794393
292	0	125	0	0	7,643312102
293	0	126	0	1	6,097560976
294	0	126	2	1	8,219178082
295	0	127	0	0	2,127659574
296	0	127	4	0	6,164383562
297	0	128	0	1	2,597402597
298	0	129	0	0	1,075268817
299	0	130	0	1	1,086956522
300	0	131	0	1	2
301	0	132	0	1	4
302	0	133	0	1	2,325581395
303	0	134	0	1	0
304	0	134	2	1	0
305	0	134	3	1	8,695652174
306	0	135	0	0	1,282051282
307	0	136	0	0	6
308	0	136	5	0	8,571428571
309	0	136	7	0	14,54545455
310	0	136	8	0
311	0	136	9	0	9,803921569
312	0	136	10	0	7,01754386
313	0	136	11	0	7,692307692
314	0	136	12	0	4,494382022
315	0	136	13	0	2,702702703
316	0	136	14	0	4,424778761
317	0	137	0	1	12,72727273
318	0	137	1	1	5,797101449
319	0	137	2	1
320	0	137	4	1	10,71428571
321	0	138	0	0	2,469135802
322	0	139	0	0	1,515151515
323	0	140	0	0	2,919708029
324	0	140	2	0	2,5
325	0	140	6	0	5,625
326	0	141	0	0	1,449275362
327	0	142	0	1	9,230769231
328	0	143	0	1	6,18556701
329	0	144	0	0	1,219512195
330	0	145	0	0	4,807692308
331	0	146	0	0	4,411764706
332	0	147	0	1	2,985074627
333	0	148	0	1	0
334	0	149	0	0	2,803738318
335	0	150	0	1	4,47761194
336	0	151	0	1	2,564102564
337	0	152	0	0	0
338	0	153	0	0	0
339	0	154	0	0	1,298701299
340	0	155	0	0	1,369863014
341	0	156	0	0	11,45833333
342	0	157	0	1	1,265822785
343	0	158	0	0	6,862745098
344	0	159	0	0	7,894736842
345	0	160	0	0	1,6
346	0	161	0	1	1,408450704
347	0	162	0	1	2,941176471
348	0	163	0	0	3,603603604
349	0	164	0	1	1,351351351
350	0	165	0	1	1,515151515
351	0	166	0	1	0,847457627
352	0	167	0	0	12,6984127
353	0	168	0	0	1,379310345
355	0	170	0	0	6,666666667
356	0	171	0	0	0,833333333
357	0	172	0	0	3,921568627
358	0	173	0	1	6,349206349
359	0	174	0	0	9,929078014
360	0	175	0	1	2,564102564
361	0	176	0	0	2,547770701
362	0	177	0	0	1,470588235
363	0	178	0	1	2
364	0	179	0	0	0
365	0	179	2	0
366	0	179	3	0
367	0	179	5	0	3,773584906
368	0	179	6	0
369	0	179	6	0
370	0	179	7	0
371	0	179	8	0
372	0	179	9	0	10
373	0	179	10	0	9,523809524
374	0	179	11	0
375	0	179	12	0	3,896103896
376	0	179	13	0
377	0	179	14	0	1,111111111
378	0	179	15	0
379	0	179	16	0	0,819672131
380	0	180	0	1	6,25
381	0	181	0	0	5,384615385
382	0	182	0	0	0
383	0	183	0	0	6,422018349
384	0	184	0	0	8,095238095
385	0	185	0	0	1,123595506
386	0	186	0	1	4,424778761
387	0	187	0	0	4,166666667
388	0	188	0	1	1,351351351
389	0	189	0	1	0
390	0	189	2	1
391	0	189	4	1	10,22727273
392	0	190	0	0	1,069518717
393	0	191	0	0	4,651162791
394	0	192	0	0	9,756097561
395	0	193	0	0	2,590673575
396	0	194	0	1	5,797101449
397	0	195	0	0	0
398	0	196	0	1	0
399	0	197	0	0	1,709401709
400	0	198	0	0	3,149606299
401	0	199	0	1	4,109589041
402	0	200	0	1	4,444444444
403	0	201	0	1	1,176470588
404	0	202	0	1	5,555555556
405	0	203	0	1	1,960784314
406	0	204	0	0	5,590062112
407	0	205	0	0	3,658536585
408	0	206	0	0	1,234567901
409	0	207	0	0	13,40206186
410	0	208	0	1	1,515151515
411	0	209	0	0	4,12371134
412	0	210	0	1	15,78947368
413	0	211	0	0	4,615384615
414	0	212	0	1	2,054794521
415	0	213	0	1	2,4
416	0	214	0	1	7,692307692
417	0	215	0	1	1,086956522
418	0	216	0	0	1,62601626
419	0	216	2	0	2,43902439
420	0	216	3	0
421	0	216	4	0	2,797202797
422	0	216	6	0
423	0	216	7	0
424	0	216	9	0	2,564102564
425	0	217	0	1	1,324503311
426	0	217	3	1	4,201680672
427	0	217	5	1	6,41025641
428	0	217	7	1
429	0	218	0	0	0
430	0	219	0	0	2,521008403
431	0	220	0	1	6,086956522
432	0	221	0	0	2,222222222
433	0	222	0	0	3,896103896
434	0	223	0	1	0,757575758
435	0	224	0	1	2,631578947
436	0	225	0	1	13,55932203
437	0	226	0	0	1,162790698
438	0	227	0	0	10,38961039
439	0	228	0	0	3,03030303
440	0	229	0	0	5,063291139
441	0	230	0	0	2,580645161
442	0	231	0	1	0
443	0	232	0	0	2,53164557
444	0	233	0	0	2,205882353
445	0	234	0	0	2,380952381
446	0	235	0	0	4,761904762
447	0	236	0	0	2,564102564
448	0	237	1	1	10
449	0	237	1	1	13,04347826
450	0	237	1	1	11,11111111
451	0	237	2	1	8,823529412
452	0	237	3	1	21,42857143
453	0	237	4	1	19,04761905
454	0	237	5	1	46,96969697
455	0	238	11	1	2,4
456	0	238	12	1	2,127659574
457	0	238	13	1	1,52284264
458	0	238	14	1	3,50877193
459	0	238	15	1	3,448275862
460	0	238	16	1	3,141361257
461	0	239	0	0	5,479452055
462	0	240	1	0	3,333333333
463	0	240	3	0	15,38461538
464	0	240	4	0	15,51724138
465	0	241	0	1	34,56790123
466	0	241	0	1	28,57142857
467	0	241	1	1	26,80412371
468	0	241	2	1	22,58064516
469	0	241	2	1	23,94366197
470	0	241	3	1	18,51851852
471	0	241	4	1	12,5
472	0	241	5	1	9,836065574
473	0	241	5	1	13,69863014
474	0	241	6	1	8,695652174
475	0	242	0	1	4,166666667
476	0	242	1	1	2,272727273
477	0	242	1	1	5,555555556
478	0	242	1	1	3,703703704
479	0	242	2	1	3,571428571
480	0	242	2	1	1,960784314
481	0	243	8	1	6,060606061
482	0	243	9	1	4,95049505
483	0	243	9	1	7,575757576
484	0	243	10	1	5,970149254
485	0	243	11	1	7,142857143
486	0	244	2	0	5,882352941
487	0	244	6	0	2,189781022
488	0	245	2	1	4,347826087
489	0	246	0	0	7,575757576
490	0	246	2	0	12
491	0	247	2	0	12,5
492	0	247	4	0	11,76470588
493	0	247	5	0	12,12121212
494	0	247	6	0	10
495	0	248	1	0	1,550387597
496	0	248	2	0	5,555555556
497	0	248	3	0	4,597701149
498	0	248	4	0	6,25
499	0	249	2	1	16,92307692
500	0	249	3	1	18
501	0	249	3	1	21,73913043
502	0	249	4	1	15
503	0	249	4	1	15,90909091
504	0	249	4	1	17,94871795
505	0	249	5	1	13,46153846
506	0	249	6	1	9,230769231
507	0	249	7	1	10,66666667
508	0	250	2	0	3,50877193
509	0	250	5	0	7,80141844
510	0	250	6	0	7,386363636
511	0	251	2	0	2,631578947
512	0	251	3	0	2,18579235
513	0	251	5	0	5,555555556
514	0	252	7	1	3,100775194
515	0	252	8	1	3,703703704
516	0	252	9	1	4,8
517	0	252	10	1	4,929577465
518	0	252	11	1	2,51572327
519	0	252	12	1	1,923076923
520	0	253	6	1	11,76470588
521	0	253	7	1	5,479452055
522	0	253	7	1	3,703703704
523	0	253	7	1	2,777777778
524	0	253	7	1	4,347826087
525	0	253	8	1	3,488372093
526	0	253	9	1	2,702702703
527	0	254	6	1	6,25
528	0	255	6	0	4,597701149
529	0	255	7	0	0,884955752
530	0	255	8	0	1,290322581
531	0	255	9	0	0
532	0	255	10	0	0,636942675
533	0	256	1	0	5,128205128
534	0	256	2	0	1,785714286
535	0	257	1	1	7,5
536	0	257	3	1	5,555555556
537	0	257	4	1	14,89361702
538	0	257	5	1	24,13793103
539	0	258	2	0	6,779661017
540	0	258	3	0	4,838709677
541	0	259	7	0	7,317073171
542	0	259	8	0	7,633587786
543	0	260	0	1	2,985074627
544	0	260	2	1	2,941176471
545	0	260	4	1	5,172413793
546	0	260	5	1	8,333333333
547	0	260	6	1	6,097560976
548	0	261	6	1	12,82051282
549	0	261	7	1	17,0212766
550	0	261	8	1	13,2231405
551	0	261	9	1	6,818181818
552	0	261	11	1	6,593406593
553	0	261	12	1	5,825242718
554	0	261	12	1	7,058823529
555	0	262	2	0	3,846153846
556	0	262	4	0	5,128205128
557	0	262	5	0	8,196721311
558	0	262	6	0	8,474576271
559	0	262	7	0	17,07317073
560	0	263	7	0	2,06185567
561	0	263	11	0	0
562	0	263	12	0	0,81300813
563	0	264	3	0	4,716981132
564	0	264	4	0	3
565	0	264	5	0	4,109589041
566	0	264	7	0	3,191489362
567	0	265	0	1	2,173913043
568	0	265	1	1	0
569	0	265	2	1	1,234567901
570	0	266	0	1	3,092783505
571	0	266	4	1	6,451612903
572	0	266	5	1	5
573	0	266	6	1	3,50877193
574	0	266	7	1	5,357142857
575	0	267	0	0	3,418803419
576	0	267	2	0	5,035971223
577	0	268	2	1	4,444444444
578	0	268	2	1	4,47761194
579	0	268	3	1	2,34375
580	0	268	3	1	2,23880597
581	0	269	4	0	0,41322314
582	0	270	3	1	19,04761905
583	0	270	4	1	9,375
584	0	270	5	1	8
585	0	271	7	1	3,225806452
586	0	271	8	1	5,263157895
587	0	271	9	1	2,173913043
588	0	271	9	1	1,960784314
589	0	272	0	0	1,075268817
590	0	272	2	0	3,448275862
591	0	272	5	0	13,0952381
592	0	273	0	0	20,23809524
593	0	274	1	0	2,173913043
594	0	274	3	0	3,225806452
595	0	274	4	0	2,272727273
596	0	275	2	1	6,666666667
597	0	275	3	1	6,451612903
598	0	275	4	1	9,523809524
599	0	275	5	1	15,25423729
600	0	275	6	1	20,83333333
601	0	275	7	1	22,44897959
602	0	276	6	0	2,884615385
603	0	276	8	0	3,370786517
604	0	276	9	0	6,493506494
605	0	277	2	0	2,608695652
606	0	277	4	0	3,787878788
607	0	277	6	0	2,732240437
608	0	277	7	0	1,895734597
609	0	278	2	0	3,529411765
610	0	278	3	0	2,985074627
611	0	278	4	0	4,761904762
612	0	279	0	0	3,048780488
613	0	279	2	0	2,586206897
614	0	279	6	0	1,734104046
615	0	279	9	0	4,347826087
616	0	280	0	0	4,6875
617	0	281	16	1	1,123595506
618	0	282	5	0	5,333333333
619	0	283	1	1	4,504504505
620	0	284	4	0	4,848484848
621	0	284	5	0	4,402515723
622	0	284	6	0	3,550295858
623	0	284	7	0	2,673796791
624	0	285	1	0	3,305785124
625	0	285	3	0	4,964539007
626	0	285	4	0	4,861111111
627	0	286	0	0	4,225352113
628	0	286	2	0	10,56910569
629	0	286	3	0	7,185628743
630	0	286	5	0	4,615384615
631	0	287	4	0	1,408450704
632	0	287	6	0	2,43902439
633	0	288	7	1	0,892857143
634	0	288	8	1	1,886792453
635	0	288	8	1	2,884615385
636	0	288	9	1	2,479338843
637	0	288	9	1	0,8
638	0	288	9	1	1,612903226
639	0	288	9	1	1,156069364
640	0	288	10	1	0
641	0	288	11	1	1,086956522
642	0	288	11	1	1,546391753
643	0	288	11	1	1,57480315
644	0	289	2	0	14,28571429
645	0	290	2	0	15,38461538
646	0	290	4	0	9,090909091
647	0	290	6	0	9,090909091
648	0	291	2	0	4,545454545
649	0	291	4	0	5,050505051
650	0	291	6	0	5,263157895
651	0	292	3	1	8,139534884
652	0	292	4	1	7,407407407
653	0	292	5	1	7,142857143
654	0	293	15	0	10,52631579
655	0	293	17	0	5,882352941
656	0	294	4	0	6,818181818
657	0	294	6	0	7,692307692
658	0	294	7	0	6,52173913
659	0	295	25	1	13,1147541
660	0	296	3	0	1,764705882
661	0	296	4	0	2,290076336
662	0	297	2	0	5,357142857
663	0	297	4	0	3,773584906
664	0	298	0	0	4,347826087
665	0	298	2	0	3,846153846
666	0	298	3	0	6,4
667	0	298	4	0	5,511811024
668	0	298	5	0	9,85915493
669	0	299	3	0	10
670	0	299	5	0	3,896103896
671	0	299	7	0	5,063291139
672	0	300	2	0	5,882352941
673	0	300	3	0	3,571428571
674	0	300	4	0	13,33333333
675	0	300	6	0	8,571428571
676	0	301	0	0	1,086956522
677	0	301	9	0	3,2
678	0	301	12	0	3,50877193
679	0	302	2	0	3,03030303
680	0	302	3	0	1,863354037
681	0	302	4	0	1,5625
682	0	303	2	0	1,351351351
683	0	304	2	0	12,72727273
684	0	305	3	0	5,952380952
685	0	305	4	0	9,615384615
686	0	306	1	0	9,523809524
687	0	307	1	1	1,111111111
688	0	307	3	1	1,694915254
689	0	307	4	1	3,333333333
690	0	308	1	1	0
691	0	308	2	1	1,428571429
692	0	309	1	1	1,333333333
693	0	309	2	1	2,173913043
694	0	309	3	1	1,234567901
695	0	309	3	1	2,631578947
696	0	309	4	1	2,380952381
697	0	310	1	0	7,575757576
698	0	310	3	0	12,63157895
699	0	310	4	0	11,65048544
700	0	311	2	0	4,285714286
701	0	311	3	0	10,25641026
702	0	311	4	0	7,619047619
703	0	312	2	0	4,651162791
704	0	312	3	0	5,128205128
705	0	313	2	0	1,680672269
706	0	313	3	0	2,521008403
707	0	313	4	0	2,564102564
708	0	314	2	0	2,764976959
709	0	314	3	0	2,272727273
710	0	314	4	0	2,380952381
711	0	315	2	1	11,49425287
712	0	316	2	0	2,23880597
715	0	318	1	0	0
716	0	318	2	0	2
717	0	318	4	0	1,428571429
718	0	318	7	0	3,296703297
719	0	318	9	0	3,333333333
720	0	319	2	1	5,128205128
721	0	319	3	1	10,63829787
722	0	319	4	1	10,38961039
723	0	319	5	1	10,97560976
724	0	319	6	1	6
725	0	319	9	1	2,173913043
726	0	319	10	1	2,941176471
727	0	319	11	1	3,603603604
728	0	319	12	1	3,351955307
729	0	319	13	1	6,25
730	0	320	0	1	8,163265306
731	0	321	0	0	3,797468354
732	0	321	3	0	8,808290155
733	0	322	0	0	1,538461538
734	0	322	1	0	4,761904762
735	0	323	0	0	3,370786517
736	0	323	4	0	5,434782609
737	0	324	3	0	0,925925926
738	0	325	2	0	10,79136691
739	0	326	0	1	18,91891892
740	0	326	1	1	6
741	0	326	2	1	8,695652174
742	0	326	3	1	2,325581395
743	0	326	4	1	2,222222222
744	0	327	1	0	3,773584906
745	0	328	2	1	10,44776119
746	0	328	3	1	25,51020408
747	0	329	0	0	0
748	0	329	1	0	0
749	0	329	2	0	1,098901099
750	0	329	3	0	0
751	0	330	0	0	4,545454545
752	0	331	8	1	16,32653061
753	0	331	9	1	9,615384615
754	0	331	10	1	5,555555556
755	0	331	11	1	5,172413793
756	0	331	14	1	5,970149254
757	0	331	15	1	4,054054054
758	0	331	16	1	5,084745763
759	0	331	17	1	3,50877193
760	0	331	18	1	1,851851852
761	0	332	0	1	0
762	0	332	0	1	0
763	0	333	5	1	2,777777778
764	0	333	6	1	2,857142857
765	0	333	7	1	2,941176471
766	0	334	2	0	2,597402597
767	0	334	3	0	1,818181818
768	0	335	10	1	0,763358779
769	0	335	11	1	0,729927007
770	0	335	12	1	0,714285714
771	0	335	13	1	1,834862385
772	0	335	14	1	1,307189542
773	0	335	19	1	0,684931507
774	0	335	20	1	1,379310345
775	0	335	21	1	1,185770751
776	0	336	1	1	0
777	0	337	0	0	3,571428571
778	0	338	3	0	1,111111111
779	0	339	0	0	0
780	0	340	0	0	3,514376997
781	0	341	9	1	5,405405405
782	0	341	12	1	6,493506494
783	0	341	13	1	6,578947368
784	0	341	14	1	6,329113924
785	0	341	15	1	6,779661017
786	0	341	16	1	6,944444444
787	0	341	21	1	20
788	0	341	22	1	14,28571429
789	0	341	23	1	7,692307692
790	0	342	0	0	0
791	0	343	3	0	14,42307692
792	0	344	0	0	1,315789474
793	0	345	2	1	0
794	0	346	0	0	0,862068966
795	0	346	3	0	4,273504274
796	0	347	10	0	12,87878788
797	0	347	11	0	6,756756757
798	0	348	3	1	0
799	0	348	6	1	0
800	0	349	4	1	11,18881119
801	0	349	4	1	9,649122807
802	0	349	5	1	5
803	0	349	6	1	4,301075269
804	0	349	7	1	2,083333333
805	0	349	12	1	1,960784314
806	0	349	13	1	2,659574468
807	0	349	14	1	2,051282051
808	0	349	15	1	1,578947368
809	0	350	5	1	5,681818182
810	0	350	8	1	4,032258065
811	0	350	9	1	3,149606299
812	0	350	10	1	3,623188406
813	0	350	11	1	3,921568627
814	0	350	12	1	1,398601399
815	0	350	17	1	1,657458564
816	0	350	18	1	2,906976744
817	0	350	19	1	3,468208092
818	0	351	5	0	4,651162791
819	0	352	0	0	4,347826087
820	0	352	2	0	4,032258065
821	0	353	2	1	11,29032258
822	0	353	3	1	14,45783133
823	0	353	4	1	10
824	0	354	3	0	2,53164557
825	0	355	1	1	6,12244898
826	0	355	5	1	4
827	0	355	6	1	6,451612903
828	0	355	7	1	8,823529412
829	0	355	8	1	6,818181818
830	0	355	11	1	6,666666667
831	0	355	12	1	7,5
832	0	355	13	1	4,255319149
833	0	355	14	1	6
834	0	355	15	1	6,153846154
835	0	356	2	1	2,02020202
836	0	356	5	1	1,351351351
837	0	356	6	1	4,166666667
838	0	356	7	1	4,210526316
839	0	356	8	1	5,434782609
840	0	356	9	1	4,545454545
841	0	356	12	1	2,173913043
842	0	356	13	1	2,43902439
843	0	356	14	1	1,408450704
844	0	356	15	1	0,840336134
845	0	356	16	1	0,793650794
846	0	357	0	0	3,409090909
847	0	358	0	0	0,440528634
848	0	359	1	0	4,210526316
849	0	359	3	0	4
850	0	359	9	0	2,298850575
851	0	360	1	1	2,702702703
852	0	360	2	1	1,910828025
853	0	360	3	1	2,941176471
854	0	360	4	1	4,615384615
855	0	360	7	1	2,631578947
856	0	360	8	1	1,382488479
857	0	360	9	1	1,581027668
858	0	360	10	1	2,054794521
859	0	360	10	1	1,685393258
860	0	360	11	1	1,960784314
861	0	361	1	1	6,451612903
862	0	361	2	1	9,677419355
863	0	361	9	1	3,03030303
864	0	361	10	1	5,084745763
865	0	361	11	1	6
866	0	362	0	0	0
867	0	363	2	0	7,317073171
868	0	364	4	0	10,56910569
869	0	364	6	0	3,25203252
870	0	365	0	0	3,06122449
871	0	365	5	0	6,875
872	0	365	6	0	4,761904762
873	0	365	7	0	2,336448598
874	0	365	8	0	3,243243243
875	0	365	9	0	2,604166667
876	0	366	3	0	8,181818182
877	0	367	0	0	8,888888889
878	0	367	2	0	7,602339181
879	0	368	10	1	3,846153846
880	0	369	3	0	7,142857143
881	0	369	5	0	6,578947368
882	0	369	8	0	2,631578947
883	0	370	0	0	3,125
884	0	371	0	0	0
885	0	372	5	0	2,777777778
886	0	373	0	0	4,347826087
887	0	374	0	0	0
888	0	375	0	0	0
889	0	375	2	0	0
890	0	375	6	0	6,52173913
891	0	376	0	0	5,172413793
892	0	376	0	0	4,62962963
893	0	377	0	1	6,097560976
894	0	377	1	1	10,71428571
895	0	377	2	1	18,33333333
896	0	377	5	1	8,571428571
897	0	377	6	1	4,347826087
898	0	377	7	1	3,816793893
899	0	377	8	1	2,877697842
900	0	377	9	1	3,278688525
901	0	378	0	1	6,41025641
902	0	378	2	1	7,692307692
903	0	378	3	1	4,705882353
904	0	378	6	1	11,23595506
905	0	378	7	1	9,090909091
906	0	378	8	1	9,090909091
907	0	378	9	1	6,730769231
908	0	378	10	1	5,161290323
909	0	379	0	0	3,703703704
910	0	380	0	0	1,685393258
911	0	381	2	0	4,761904762
912	0	382	2	1	3,125
913	0	383	4	0	24,79338843
914	0	384	1	1	2,919708029
915	0	384	2	1	3,225806452
916	0	384	5	1	1,777777778
917	0	384	6	1	2,202643172
918	0	384	7	1	1,242236025
919	0	384	8	1	0,9375
920	0	384	8	1	0,810810811
921	0	385	1	1	0
922	0	386	0	0	2,150537634
923	0	386	1	0	5,714285714
924	0	387	4	0	10,75268817
925	0	388	1	0	0,746268657
926	0	389	2	0	6,818181818
927	0	389	6	0	12,04819277
928	0	390	2	0	12,72727273
929	0	390	6	0	8,333333333
930	0	390	10	0	6,315789474
931	0	391	0	1	9,375
932	0	392	2	1	12,82051282
933	0	392	5	1	9,210526316
934	0	393	5	0	2,857142857
935	0	394	2	0	2,5
936	0	395	2	0	5,487804878
937	0	396	2	0	8
938	0	397	2	0	1,428571429
939	0	397	5	0	3,409090909
940	0	398	6	0	4,938271605
941	0	399	2	0	7,777777778
942	0	400	0	0	2,173913043
943	0	400	1	0	3,389830508
944	0	400	4	0	3,409090909
945	0	401	4	1	8,695652174
946	0	401	5	1	7,777777778
947	0	401	6	1	7,216494845
948	0	401	7	1	8
949	0	401	8	1	6,504065041
950	0	402	3	0	16,8
951	0	403	2	0	7,476635514
952	0	404	2	0	5,633802817
953	0	405	2	1	3,25203252
954	0	405	5	1	8,860759494
955	0	405	5	1	5,128205128
956	0	405	6	1	3,409090909
957	0	406	0	1	2,857142857
958	0	406	2	1	6,024096386
959	0	406	3	1	4,210526316
960	0	406	4	1	4,678362573
961	0	407	2	0	2
962	0	407	6	0	3,703703704
963	0	407	7	0	9,523809524
964	0	407	9	0	17,24137931
965	0	407	13	0	8,510638298
966	0	408	0	0	3,846153846
967	0	408	3	0	6,944444444
968	0	409	2	0	6,363636364
969	0	409	5	0	11,02941176
970	0	410	0	0	9,433962264
971	0	410	2	0	13,51351351
972	0	411	0	0	2
973	0	412	2	1	0
974	0	412	5	1	7,843137255
975	0	412	6	1	11,11111111
976	0	413	0	1	0
977	0	413	3	1	6,779661017
978	0	413	4	1	5,084745763
979	0	413	5	1	4
980	0	413	6	1	6,666666667
981	0	413	7	1	4,938271605
982	0	414	1	0	4,444444444
983	0	415	1	0	2,941176471
984	0	416	0	0	3,448275862
985	0	416	1	0	2,06185567
986	0	417	0	0	3,017241379
987	0	417	1	0	1,809954751
988	0	417	2	0	1,860465116
989	0	417	4	0	2,234636872
990	0	417	7	0	2,06185567
991	0	417	9	0	1,41509434
992	0	418	13	0	2,02020202
993	0	418	14	0	4,225352113
994	0	418	17	0	7,407407407
995	0	418	18	0	5,084745763
996	0	418	19	0	7,692307692
997	0	418	21	0	2
998	0	418	24	0	0
999	0	418	26	0	0
1000	0	419	0	0	3,658536585
1001	0	419	2	0	7,692307692
1002	0	419	3	0	4,210526316
1003	0	420	0	1	5,555555556
1004	0	420	1	1	3,191489362
1005	0	421	0	1	2,362204724
1006	0	421	0	1	0
1007	0	422	0	1	2,631578947
1008	0	422	1	1	2,702702703
1009	0	422	2	1	0
1010	0	423	0	1	10,44776119
1011	0	423	2	1	11,42857143
1012	0	423	4	1	12,28070175
1013	0	424	0	0	4,166666667
1014	0	424	1	0	5,333333333
1015	0	424	5	0	10,52631579
1016	0	424	7	0	5,357142857
1017	0	425	12	1	7,56302521
1018	0	426	0	1	4,12371134
1019	0	427	0	1	8,823529412
1020	0	427	1	1	5,405405405
1021	0	428	0	0	2,097902098
1022	0	428	3	0	2,469135802
1023	0	428	4	0	3,846153846
1024	0	428	6	0	9,016393443
1025	0	429	0	1	1,162790698
1026	0	429	1	1	1,459854015
1027	0	429	2	1	0,892857143
1028	0	429	5	1	0,819672131
1029	0	429	8	1	2,43902439
1030	0	429	11	1	4,651162791
1031	0	430	1	1	3,636363636
1032	0	431	0	0	1,204819277
1033	0	432	0	0	0,980392157
1034	0	432	1	0	1,298701299
1035	0	432	3	0	0,925925926
1036	0	433	0	0	6,024096386
1037	0	433	1	0	7,070707071
1038	0	433	2	0	7,407407407
1039	0	434	0	0	3,50877193
1040	0	434	1	0	6,52173913
1041	0	434	3	0	7,272727273
1042	0	434	5	0	8,196721311
1043	0	434	7	0	7,52688172
1044	0	435	8	0	0
1045	0	435	11	0	0,81300813
1046	0	436	0	1	2,205882353
1047	0	437	0	1	10,52631579
1048	0	437	2	1	6,153846154
1049	0	438	0	0	2,727272727
1050	0	438	2	0	4,054054054
1051	0	438	4	0	4,597701149
1052	0	439	0	1	12,96296296
1053	0	439	2	1	24,16666667
1054	0	440	2	0	1,904761905
1055	0	441	0	0	4,901960784
1056	0	441	1	0	4,47761194
1057	0	441	3	0	4,587155963
1058	0	442	0	1	2,259887006
1059	0	442	1	1	2,985074627
1060	0	442	2	1	4,166666667
1061	0	442	3	1	3,9408867
1062	0	442	6	1	12,6984127
1063	0	443	0	1	6,25
1064	0	443	2	1	2,222222222
1065	0	443	4	1	0
1066	0	443	5	1	2,43902439
1067	0	444	0	1	10,56910569
1068	0	444	1	1	12,32876712
1069	0	445	0	0	2,247191011
1070	0	445	1	0	4,081632653
1071	0	445	6	0	8,333333333
1072	0	445	8	0	6,25
1073	0	445	10	0	2,307692308
1074	0	445	13	0	1,01010101
1075	0	446	2	1	2,02020202
1076	0	446	6	1	3,521126761
1077	0	446	8	1	2,43902439
1078	0	446	11	1	2,479338843
1079	0	446	18	1	2,727272727
1080	0	446	20	1	2,678571429
1081	0	447	1	0	8,333333333
1082	0	447	3	0	11,36363636
1083	0	447	6	0	4,347826087
1084	0	447	8	0	3,488372093
1085	0	447	10	0	2,739726027
1086	0	447	13	0	1,369863014
1087	0	448	0	0	3,773584906
1088	0	448	2	0	5,714285714
1089	0	449	0	0	2,739726027
1090	0	449	1	0	2,702702703
1091	0	449	4	0	10
1092	0	449	6	0	3,921568627
1093	0	449	8	0	3,947368421
1094	0	450	0	0	6,25
1095	0	450	2	0	8,860759494
1096	0	450	3	0	7
1097	0	450	5	0	0,925925926
1098	0	451	0	0	5,072463768
1099	0	452	0	1	1,923076923
1100	0	453	0	1	4,838709677
1101	0	453	4	1	8,163265306
1102	0	453	6	1	14,70588235
1103	0	453	8	1	9,756097561
1104	0	454	7	0	6,194690265
1105	0	454	10	0	3,20855615
1106	0	455	0	1	1,257861635
1107	0	455	2	1	4,705882353
1108	0	455	4	1	5,194805195
1109	0	456	0	0	2,040816327
1110	0	456	4	0	3,048780488
1111	0	457	1	0	1,470588235
1112	0	457	3	0	1,333333333
1113	0	457	5	0	2,5
1114	0	457	8	0	2,941176471
1115	0	457	10	0	2,150537634
1116	0	457	12	0	1,503759398
1117	0	458	0	0	8,235294118
1118	0	458	1	0	3,846153846
1119	0	459	0	1	15,68627451
1120	0	460	0	1	3,636363636
1121	0	460	2	1	3,125
1122	0	461	0	0	2,127659574
1123	0	461	3	0	3,076923077
1124	0	462	1	0	9,230769231
1125	0	463	0	1	12,6984127
1126	0	464	0	0	8,333333333
1127	0	464	1	0	4,964539007
1128	0	464	3	0	3,50877193
1129	0	465	0	0	1,041666667
1130	0	465	3	0	3,164556962
1131	0	466	0	0	4,444444444
1132	0	467	0	0	5,633802817
1133	0	468	0	1	9,523809524
1134	0	468	1	1	4,21686747
1135	0	469	0	0	0
1136	0	469	1	0	0
1137	0	470	0	0	1,298701299
1138	0	471	0	0	3,333333333
1139	0	471	1	0	6,862745098
1140	0	471	4	0	14,28571429
1141	0	472	0	1	1,935483871
1143	0	472	11	1	3,921568627
1144	0	472	13	1	3,773584906
1145	0	473	0	1	1,5625
1146	0	473	1	1	1,104972376
1147	0	473	3	1	0
1148	0	474	3	0	2,752293578
1149	0	474	5	0	2,325581395
1150	0	475	0	1	3,03030303
1151	0	476	0	0	3,846153846
1152	0	476	1	0	8,620689655
1153	0	477	0	1	5,454545455
1154	0	477	4	1	10,86956522
1155	0	477	6	1	11,36363636
1156	0	477	8	1	8,571428571
1157	0	477	10	1	10
1158	0	478	0	0	1,19047619
1159	0	478	1	0	0
1160	0	478	4	0	2,173913043
1161	0	479	0	0	7,633587786
1162	0	479	2	0	5,714285714
1163	0	479	4	0	6,730769231
1164	0	479	7	0	5,957446809
1165	0	480	0	0	6,666666667
1166	0	480	1	0	8,139534884
1167	0	480	4	0	15,17857143
1168	0	480	6	0	11,71171171
1169	0	481	0	0	10,07751938
1170	0	482	0	0	7,216494845
1171	0	483	2	1	3,773584906
1172	0	484	0	0	0
1173	0	484	1	0	2,127659574
1174	0	485	0	0	7,246376812
1175	0	485	2	0	7,462686567
1176	0	485	5	0	7,272727273
1177	0	485	7	0	4,651162791
1178	0	485	9	0	2,325581395
1179	0	486	0	0	1,398601399
1180	0	486	3	0	2,205882353
1181	0	487	0	1	1,265822785
1182	0	487	1	1	2,272727273
1183	0	487	3	1	0
1184	0	487	5	1	2,857142857
1185	0	488	0	1	3,703703704
1186	0	488	2	1	0
1187	0	488	4	1	0
1188	0	488	7	1	0
1189	0	489	0	0	3,883495146
1190	0	489	4	0	5,263157895
1191	0	490	4	0	4,098360656
1192	0	490	7	0	3,211009174
1193	0	491	1	1	12,5
1194	0	491	2	1	4,761904762
1195	0	491	3	1	6,896551724
1196	0	491	6	1	6,060606061
1197	0	491	8	1	2,53164557
1198	0	491	10	1	3,488372093
1199	0	492	0	0	3,947368421
1200	0	492	1	0	2,919708029
1201	0	493	0	0	4,054054054
1202	0	493	1	0	3,496503497
1203	0	494	0	0	5,660377358
1204	0	494	2	0	6,481481481
1205	0	494	3	0	9,090909091
1206	0	495	0	1	15,78947368
1207	0	495	2	1	6,12244898
1208	0	495	4	1	7,142857143
1209	0	495	6	1	8
1210	0	495	6	1	4,838709677
1211	0	495	7	1	4,615384615
1212	0	496	0	1	3,305785124
1213	0	496	1	1	2,684563758
1214	0	497	9	1	4,716981132
1215	0	497	12	1	2,631578947
1216	0	498	0	0	12,35955056
1217	0	498	1	0	13,26530612
1218	0	498	3	0	2,97029703
1219	0	498	5	0	2,040816327
1220	0	499	0	0	3,529411765
1221	0	500	0	1	3,797468354
1222	0	500	1	1	2,150537634
1223	0	500	2	1	4,347826087
1224	0	500	4	1	5,263157895
1225	0	500	7	1	3,448275862
1226	0	500	9	1	1,19047619
1227	0	501	0	0	0,840336134
1228	0	501	4	0	2,564102564
1229	0	501	6	0	1,680672269
1230	0	501	8	0	0,900900901
1231	0	501	11	0	1,25
1232	0	502	0	0	2,362204724
1233	0	503	0	1	0
1234	0	503	1	1	2,083333333
1235	0	504	0	0	8,695652174
1236	0	504	13	0	1,724137931
1237	0	504	15	0	1,298701299
1238	0	504	18	0	1,470588235
1239	0	505	0	0	6,329113924
1240	0	506	0	1	2,380952381
1241	0	506	2	1	2,985074627
1242	0	507	0	0	1,020408163
1243	0	507	7	0	3,100775194
1244	0	508	0	0	7,692307692
1245	0	509	0	0	0,833333333
1246	0	510	0	0	6,818181818
1247	0	510	2	0	5,769230769
1248	0	510	4	0	5,217391304
1249	0	510	7	0	2,189781022
1250	0	511	0	1	10,46511628
1251	0	511	1	1	6,779661017
1252	0	512	0	0	6,451612903
1253	0	512	1	0	8,219178082
1254	0	512	3	0	22,22222222
1255	0	512	5	0	10,30927835
1256	0	512	8	0	4,411764706
1257	0	512	12	0	7,643312102
1258	0	513	0	1	2,127659574
1259	0	513	1	1	0,746268657
1260	0	513	3	1	5,405405405
1261	0	514	0	1	6,52173913
1262	0	514	1	1	10,11235955
1263	0	514	3	1	21,56862745
1264	0	514	7	1	40,74074074
1265	0	514	10	1	17,77777778
1266	0	514	11	1	9,243697479
1267	0	514	14	1	10,1910828
1268	0	514	16	1	7,594936709
1269	0	515	1	0	0,775193798
1270	0	515	4	0	3,896103896
1271	0	516	0	0	4,580152672
1272	0	516	1	0	5,607476636
1273	0	516	2	0	4,697986577
1274	0	516	4	0	6,711409396
1275	0	516	7	0	1,807228916
1276	0	517	0	0	2,06185567
1277	0	517	1	0	1,724137931
1278	0	517	3	0	2,941176471
1279	0	517	5	0	4,597701149
1280	0	517	9	0	3,875968992
1281	0	517	10	0
1282	0	518	0	1	9,302325581
1283	0	519	0	0	2,919708029
1284	0	519	4	0	5,128205128
1285	0	519	6	0	4,310344828
1286	0	519	8	0	0,847457627
1287	0	520	0	0	5,825242718
1288	0	520	3	0	10,9375
1289	0	520	5	0	5,617977528
1290	0	520	8	0	3,816793893
1291	0	521	0	0	0
1292	0	522	0	0	1,282051282
1293	0	522	3	0	4,285714286
1294	0	523	0	0	3,361344538
1295	0	523	1	0	3,921568627
1296	0	524	0	1	3,703703704
1297	0	525	0	1	12,12121212
1298	0	525	1	1	12,85714286
1299	0	525	3	1	8,064516129
1300	0	526	0	0	4,109589041
1301	0	526	1	0	1,869158879
1302	0	527	0	0	3,680981595
1303	0	527	3	0	8,75
1304	0	527	4	0	11,02362205
1305	0	527	6	0	9,166666667
1306	0	527	8	0	5,64516129
1307	0	527	11	0	1,388888889
1308	0	528	0	1	18,60465116
1309	0	528	2	1	42,36111111
1310	0	529	0	0	4
1311	0	529	3	0	5,769230769
1312	0	529	6	0	5,970149254
1313	0	529	8	0	5,825242718
1314	0	529	13	0	0,694444444
1315	0	530	0	1	8,196721311
1316	0	530	2	1	9,195402299
1317	0	530	8	1	8,227848101
1318	0	531	0	0	3,797468354
1319	0	532	0	0	7,482993197
1320	0	533	0	0	5,454545455
1321	0	533	1	0	3,409090909
1322	0	533	4	0	9,401709402
1323	0	533	6	0	3,03030303
1324	0	534	0	1	0
1325	0	534	2	1	2,173913043
1326	0	534	4	1	0
1327	0	534	5	1	0
1328	0	534	7	1	4,651162791
1329	0	535	0	1	13,18681319
1330	0	536	0	0	10,60606061
1331	0	536	2	0	9,230769231
1332	0	537	0	0	7,272727273
1333	0	537	2	0	11,76470588
1334	0	537	4	0	9,708737864
1335	0	537	7	0	4,901960784
1336	0	538	0	0	1,398601399
1337	0	539	0	0	2,197802198
1338	0	539	1	0	1,960784314
1339	0	539	3	0	5,555555556
1340	0	539	5	0	5,063291139
1341	0	540	0	0	2,631578947
1342	0	540	2	0	18,60465116
1343	0	540	4	0	20,68965517
1344	0	540	5	0	15,26717557
1345	0	541	0	1	0,869565217
1346	0	541	1	1	1,149425287
1347	0	542	0	0	4,225352113
1348	0	542	4	0	8,108108108
1349	0	543	0	0	3,260869565
1350	0	544	0	0	2,222222222
1351	0	544	1	0	2,127659574
1352	0	544	3	0	3,448275862
1353	0	544	4	0	5,128205128
1354	0	544	6	0	11,11111111
1355	0	545	0	0	6,730769231
1356	0	545	2	0	10,9375
1357	0	546	0	0	3,731343284
1358	0	547	0	1	10,09174312
1359	0	547	7	1	3,496503497
1360	0	547	7	1	3,973509934
1361	0	547	8	1	2,89017341
1362	0	547	9	1	2,688172043
1363	0	547	10	1	1,913875598
1364	0	547	11	1	1,145038168
1365	0	547	12	1	1,19047619
1366	0	547	13	1	0,787401575
1367	0	547	14	1	0,877192982
1368	0	547	15	1	0,985221675
1369	0	547	16	1	2,145922747
1370	0	548	0	1	4,938271605
1371	0	548	2	0	3,50877193
1372	0	549	0	0	0
1373	0	549	5	0	6,666666667
1374	0	549	9	0	2,631578947
1375	0	549	13	0	3,448275862
1376	0	549	15	0	2,941176471
1377	0	549	16	0	2,857142857
1378	0	549	19	0	3,448275862
1379	0	550	0	0	5,839416058
1380	0	551	0	0	5
1381	0	551	2	0
1382	0	551	6	0	2,941176471
1383	0	551	9	0	1,149425287
1384	0	552	0	0	0
1385	0	552	5	0	1,123595506
1386	0	552	7	0	1,298701299
1387	0	552	8	0	3,389830508
1388	0	553	0	0	3,703703704
1389	0	553	2	0	5,263157895
1390	0	554	0	1	3,703703704
1391	0	554	4	1	3,225806452
1392	0	554	5	1	3,896103896
1393	0	554	6	1	2,43902439
1394	0	554	7	1	0
1395	0	554	8	1	1,257861635
1396	0	554	9	1	2,673796791
1397	0	554	10	1	2,030456853
1398	0	554	11	1	1,5
1399	0	555	0	1	2,597402597
1400	0	555	3	1	4,301075269
1401	0	555	4	1	2,777777778
1402	0	555	5	1	0
1403	0	555	6	1	1,242236025
1404	0	555	7	1	1,219512195
1405	0	555	8	1	0,625
1406	0	555	9	1	1,315789474
1407	0	555	10	1	1,587301587
1408	0	555	11	1	2,083333333
1409	0	555	12	1	0
1410	0	556	0	1	4,166666667
1411	0	556	4	1	5,797101449
1412	0	556	5	1	4,347826087
1413	0	556	6	1	0
1414	0	556	7	1	2,272727273
1415	0	556	8	1	6,12244898
1416	0	556	9	1	5,769230769
1417	0	556	10	1	3,921568627
1418	0	556	11	1	4,545454545
1419	0	556	12	1	4,225352113
1420	0	556	13	1	5,504587156
1421	0	557	0	1	1,298701299
1422	0	557	2	1	0
1423	0	558	0	1	7,142857143
1424	0	558	0	1	11,25
1425	0	558	1	1	7,092198582
1426	0	558	2	1	13,04347826
1427	0	558	3	1	19,18604651
1428	0	558	4	1	14,28571429
1429	0	558	4	1	12,10762332
1430	0	558	5	1	8,791208791
1431	0	558	6	1	6,403940887
1432	0	558	7	1	4,724409449
1433	0	558	8	1
1434	0	559	0	1	2,97029703
1435	0	559	0	1	2,040816327
1436	0	559	2	1	2,97029703
1437	0	559	2	1	6,097560976
1438	0	559	3	1	8,988764045
1439	0	559	4	1	13,24503311
1440	0	559	5	1	14,77272727
1441	0	559	6	1	17
1442	0	559	7	1	17,28395062
1443	0	559	8	1	11,9047619
1444	0	559	9	1
1445	0	560	0	1	8,108108108
1446	0	560	1	1	7,01754386
1447	0	560	2	1	14,28571429
1448	0	560	3	1	22,72727273
1449	0	560	4	1	31,48148148
1450	0	560	5	1	13,25301205
1451	0	560	6	1	6,603773585
1452	0	560	7	1	3,75
1453	0	560	8	1	0
1454	0	560	9	1	2,857142857
1455	0	560	10	1	1,941747573
1456	0	561	0	0	6,451612903
1457	0	561	1	0	6,25
1458	0	561	2	0	7,52688172
1459	0	561	7	0	2,955665025
1460	0	562	0	0	1,666666667
1461	0	562	3	0	2,272727273
1462	0	563	0	0	2,380952381
1463	0	563	1	0	1,612903226
1464	0	563	2	0	0,819672131
1465	0	564	0	0	0
1466	0	564	5	0	2,564102564
1467	0	564	7	0	1,818181818
1468	0	565	0	0	8,24742268
1469	0	565	2	0	10,22727273
1470	0	565	4	0	25,6684492
1471	0	565	7	0	4,827586207
1472	0	566	0	1	1,754385965
1473	0	566	2	1	3,75
1474	0	566	4	1	6,542056075
1475	0	566	5	1	7,37704918
1476	0	566	5	1	10,30927835
1477	0	566	5	1	6,060606061
1478	0	566	6	1	6,41025641
1479	0	566	7	1	4,838709677
1480	0	566	10	1	1,754385965
1481	0	566	11	1	7,272727273
1482	0	567	0	1	5,405405405
1483	0	567	4	1	6,153846154
1484	0	567	5	1	5,797101449
1485	0	567	6	1	5,063291139
1486	0	567	7	1	6,557377049
1487	0	567	8	1	7,792207792
1488	0	567	9	1	8,571428571
1489	0	567	10	1	11,70212766
1490	0	567	11	1	10,81081081
1491	0	567	12	1	6,474820144
1492	0	567	13	1	6,015037594
1493	0	568	0	0
1494	0	568	1	0	3,846153846
1495	0	569	0	0	1,459854015
1496	0	569	1	0	1,785714286
1497	0	569	1	0	0
1498	0	570	0	0	2,547770701
1499	0	570	1	0	2,419354839
1500	0	570	3	0	4,87804878
1501	0	571	0	0	4,761904762
1502	0	571	1	0	2,542372881
1503	0	571	2	0	3
1504	0	571	3	0	2,97029703
1505	0	572	0	1	10,71428571
1506	0	572	1	1	6,976744186
1507	0	573	4	1	19,14893617
1508	0	574	2	0	0
1509	0	574	4	0	0
1510	0	574	6	0	0
1511	0	574	11	0	0
1512	0	574	13	0	0
1513	0	574	15	0	0
1514	0	574	17	0	4,166666667
1515	0	575	4	0	10,60606061
1516	0	576	13	0	0,460829493
1517	0	577	5	1	17,9245283
1518	0	577	7	1	7,792207792
1519	0	577	10	1	3,03030303
1520	0	578	4	0	18,81188119
1521	0	579	5	0	2,352941176
1522	0	579	9	0	6,666666667
1523	0	579	11	0	11,65048544
1524	0	579	13	0	12,5984252
1525	0	579	16	0	4,195804196
1526	0	580	0	1	0
1527	0	580	5	1	1,265822785
1528	0	581	2	1	1,315789474
1529	0	581	4	1	1,470588235
1530	0	581	7	1	3,846153846
1531	0	581	9	1	2,43902439
1532	0	581	11	1	6,666666667
1533	0	581	14	1	2,083333333
1534	0	582	1	1	0
1535	0	582	3	1	0
1536	0	582	4	1	1,298701299
1537	0	582	6	1	2,083333333
1538	0	582	8	1	11,76470588
1539	0	583	1	1	3,260869565
1540	0	583	2	1	7,692307692
1541	0	583	3	1	14,81481481
1542	0	583	5	1	10
1543	0	583	8	1	5,172413793
1544	0	583	10	1	3,174603175
1545	0	583	10	1	3,80952381
1546	0	583	12	1	2,739726027
1547	0	583	15	1	6,896551724
1548	0	584	1	0	2,702702703
1549	0	584	6	0	5,050505051
1550	0	584	9	0	5,714285714
1551	0	584	13	0	1,754385965
1552	0	585	1	0	2,380952381
1553	0	585	3	0	2,325581395
1554	0	585	5	0	3,278688525
1555	0	586	0	0	0,518134715
1556	0	586	2	0	1,290322581
1557	0	587	0	1	3,703703704
1558	0	587	2	1	3,448275862
1559	0	587	4	1	3,03030303
1560	0	587	5	1	3,03030303
1561	0	587	7	1	4,545454545
1562	0	587	9	1	3,846153846
1563	0	587	12	1	3,571428571
1564	0	588	1	0	11,76470588
1565	0	588	3	0	6,603773585
1566	0	589	1	0	5,333333333
1567	0	589	3	0	6,578947368
1568	0	590	1	0	0
1569	0	590	2	0	1,086956522
1570	0	590	5	0	1,923076923
1571	0	590	7	0	2,409638554
1572	0	591	0	0	2,803738318
1573	0	591	1	0	1,886792453
1574	0	591	2	0	7,142857143
1575	0	591	4	0	9,923664122
1576	0	592	0	0	1,960784314
1577	0	592	5	0	7,894736842
1578	0	592	7	0	2,857142857
1579	0	592	9	0	8,695652174
1580	0	592	11	0	2
1581	0	593	0	0	0
1582	0	593	3	0	0
1583	0	594	1	1	4
1584	0	594	2	1	2,597402597
1585	0	594	5	1	4,347826087
1586	0	594	5	1	7,5
1587	0	594	7	1	7,142857143
1588	0	594	9	1	7,246376812
1589	0	594	12	1	0
1590	0	595	0	0	1,709401709
1591	0	595	2	0	1,941747573
1592	0	596	0	0	0
1593	0	596	8	0	0
1594	0	596	9	0	2,702702703
1595	0	597	0	1	12,03703704
1596	0	597	2	1	8,974358974
1597	0	598	0	0	4,87804878
1598	0	598	2	0	2,53164557
1599	0	599	0	0	10,44776119
1600	0	599	1	0	12,06896552
1601	0	599	2	0	14,66666667
1602	0	599	4	0	9,459459459
1603	0	599	6	0	4,854368932
1604	0	599	8	0	3,703703704
1605	0	599	9	0	3,076923077
1606	0	599	11	0	2,027027027
1607	0	600	0	0	4,87804878
1608	0	600	1	0	5,882352941
1609	0	600	3	0	2,985074627
1610	0	601	0	0	7,692307692
1611	0	601	2	0	4,166666667
1612	0	601	4	0	2,380952381
1613	0	602	1	0	5,633802817
1614	0	602	3	0	14,28571429
1615	0	602	4	0	3,773584906
1616	0	602	6	0	1,298701299
1617	0	602	8	0	1,234567901
1618	0	602	10	0	1,769911504
1619	0	603	2	1	2,564102564
1620	0	603	4	1	4,545454545
1621	0	603	6	1	19,04761905
1622	0	603	7	1	10
1623	0	603	8	1	6,349206349
1624	0	603	9	1	5
1625	0	603	10	1	5,555555556
1626	0	603	11	1	3,539823009
1627	0	604	0	1	8,064516129
1628	0	604	3	1	3,658536585
1629	0	604	5	1	2,06185567
1630	0	604	7	1	2,325581395
1631	0	605	1	1
1632	0	605	4	1	1,162790698
1633	0	605	7	1	8,333333333
1634	0	605	9	1	6,25
1635	0	606	1	0	4,081632653
1636	0	606	2	0	2,857142857
1637	0	607	0	0	1,666666667
1638	0	607	1	0	1,754385965
1639	0	607	2	0	2,857142857
1640	0	607	4	0	0
1641	0	607	6	0	7,058823529
1642	0	607	8	0	5,555555556
1643	0	608	0	1	0
1644	0	608	2	1	0
1645	0	608	4	1	3,703703704
1646	0	609	0	1	13,58024691
1647	0	609	1	1	10,25641026
1648	0	609	3	1	5,128205128
1649	0	609	5	1	4,347826087
1650	0	609	5	1	4,761904762
1651	0	610	0	1	4,237288136
1652	0	610	2	1	4
1653	0	610	4	1	9,090909091
1654	0	610	5	1	12,30769231
1655	0	610	7	1	12,90322581
1656	0	610	10	1	3,571428571
1657	0	611	0	0	2,040816327
1658	0	611	2	0	3,636363636
1659	0	612	0	0	4,395604396
1660	0	612	2	0	5,172413793
1661	0	612	4	0	3,389830508
1662	0	613	0	1	7,142857143
1663	0	613	1	1	10
1664	0	613	6	1	8,333333333
1665	0	613	9	1	4,545454545
1666	0	614	0	0	6,71641791
1667	0	614	8	0	5,960264901
1668	0	614	10	0	5,555555556
1669	0	614	12	0	6,451612903
1670	0	614	14	0	11,25
1671	0	614	16	0	6,779661017
1672	0	614	18	0	9,090909091
1673	0	615	1	0	7,8125
1674	0	615	2	0	9,677419355
1675	0	615	4	0	13,33333333
1676	0	616	1	1	1,212121212
1677	0	616	3	1	0,78125
1678	0	616	4	1	2,919708029
1679	0	616	6	1	18,24817518
1680	0	617	0	1	4,87804878
1681	0	617	1	1	2,158273381
1682	0	617	3	1	7,8125
1683	0	617	5	1	5,882352941
1684	0	618	2	0	11,11111111
1685	0	618	4	0	7,547169811
1686	0	618	6	0	4,545454545
1687	0	618	8	0	1,941747573
1688	0	619	2	0	6,557377049
1689	0	619	4	0	3,174603175
1690	0	620	3	1	7,692307692
1691	0	620	3	1	3,448275862
1692	0	620	5	1	3,571428571
1693	0	620	8	1	3,571428571
1694	0	621	2	1	5,084745763
1695	0	622	0	0	9,411764706
1696	0	622	5	0	4,347826087
1697	0	623	0	0	1,851851852
1698	0	623	2	0	6,451612903
1699	0	623	4	0	2,5
1700	0	623	6	0	1,639344262
1701	0	624	0	1	0
1702	0	624	1	1	2,040816327
1703	0	624	3	1	0
1704	0	625	0	1	0
1705	0	625	2	1	18,96551724
1706	0	625	3	1	17,10526316
1707	0	625	4	1	23,07692308
1708	0	625	7	1	14,73684211
1710	0	627	0	0	5
1711	0	627	1	0
1712	0	627	3	0	4,255319149
1713	0	627	5	0	4,545454545
1714	0	628	0	0	5,172413793
1715	0	628	1	0	4,545454545
1716	0	628	3	0	12,28070175
1717	0	629	0	0	4,918032787
1718	0	629	1	0	6,896551724
1719	0	629	5	0	12,65822785
1720	0	630	0	0	5
1721	0	630	1	0	4,166666667
1722	0	630	3	0	6,172839506
1723	0	631	0	0	4,761904762
1724	0	631	2	0	6,474820144
1725	0	631	4	0	12,43243243
1726	0	631	6	0	10,16042781
1727	0	632	0	0	2,985074627
1728	0	632	2	0	2,739726027
1729	0	632	4	0	8,771929825
1730	0	632	6	0	6,779661017
1731	0	633	0	0	1,369863014
1732	0	633	3	0	2,272727273
1733	0	633	5	0	1,098901099
1734	0	633	7	0	1,785714286
1735	0	634	0	1	3,076923077
1736	0	634	2	1	6,329113924
1737	0	634	5	1	11,76470588
1738	0	634	8	1	22,85714286
1739	0	635	0	0	3,007518797
1740	0	635	5	0	8,823529412
1741	0	635	6	0	11,34020619
1742	0	636	0	0	1,923076923
1743	0	636	1	0	0
1744	0	636	3	0	2,43902439
1745	0	636	5	0	6,557377049
1746	0	637	0	0	0,622406639
1747	0	637	2	0	0,858369099
1748	0	637	4	0	0
1749	0	638	0	0	0,925925926
1750	0	638	2	0	1,851851852
1751	0	639	0	0	0,775193798
1752	0	639	1	0	1,941747573
1753	0	639	3	0	3,174603175
1754	0	640	0	1	0,99009901
1755	0	640	2	1	0,909090909
1756	0	640	6	1	9,722222222
1757	0	640	8	1	8,379888268
1758	0	641	0	1	8,24742268
1759	0	641	1	1	4,347826087
1760	0	642	0	0	0
1761	0	642	5	0	1,324503311
1762	0	642	7	0	1,62601626
1763	0	643	0	0	3,921568627
1764	0	643	1	0	3,921568627
1765	0	643	3	0	6,25
1766	0	643	5	0	6,25
1767	0	643	7	0	3,278688525
1768	0	644	0	0	0
1769	0	644	1	0	0,396825397
1770	0	645	0	0	0
1771	0	645	9	0	9,523809524
1772	0	645	13	0	7,5
1773	0	646	0	1	1,111111111
1774	0	646	2	1	4,444444444
1775	0	646	6	1	15,68627451
1776	0	647	0	1	2,5
1777	0	647	2	1	6,557377049
1778	0	648	0	0	2,197802198
1779	0	649	0	0	4,819277108
1780	0	649	1	0	5,555555556
1781	0	649	3	0	7,5
1782	0	649	6	0	7,5
1783	0	650	2	1	2,105263158
1784	0	651	10	0	1,57480315
1785	0	651	13	0	3,883495146
1786	0	651	16	0	6,818181818
1787	0	652	0	0	1,515151515
1788	0	652	2	0	1,666666667
1789	0	652	3	0	5,128205128
1790	0	652	5	0	8
1791	0	653	0	1	4,347826087
1792	0	653	2	1	7,575757576
1793	0	653	5	1	18,18181818
1794	0	654	0	0	5,769230769
1795	0	654	2	0	4,054054054
1796	0	655	0	0	1,298701299
1797	0	655	2	0	0
1798	0	656	0	0	4,21686747
1799	0	656	2	0	6,569343066
1800	0	656	3	0	6,25
1801	0	657	0	0	6,818181818
1802	0	657	2	0	5,555555556
1803	0	658	0	0	5,084745763
1804	0	658	1	0	4,04040404
1805	0	658	3	0	12,19512195
1806	0	658	5	0	8,791208791
1807	0	659	0	1	2,112676056
1808	0	659	4	1	21,875
1809	0	660	0	0	7,954545455
1810	0	660	2	0	6,086956522
1811	0	661	0	0	4
1812	0	661	2	0	5,970149254
1813	0	662	0	0	8,510638298
1814	0	662	1	0	3,50877193
1815	0	662	3	0	6,779661017
1816	0	663	0	1	8
1817	0	663	2	1	14,96062992
1818	0	663	4	1	13,33333333
1819	0	664	0	0	3,191489362
1820	0	664	2	0	2,702702703
1821	0	665	0	0	1,515151515
1822	0	665	1	0	5,555555556
1823	0	665	2	0	2,739726027
1824	0	665	4	0	9,090909091
1825	0	665	5	0	5,882352941
1826	0	666	0	1	2,941176471
1827	0	666	2	1	3,125
1828	0	666	4	1
1829	0	666	6	1	3,03030303
1830	0	667	0	0	11,11111111
1831	0	668	5	1	4,109589041
1832	0	669	4	0	10,86956522
1833	0	670	0	0	2
1834	0	670	3	0	3,797468354
1835	0	671	0	0	2,608695652
1836	0	672	0	1	13,33333333
1837	0	672	1	1	9,722222222
1838	0	672	3	1	11,11111111
1839	0	673	0	0	1,769911504
1840	0	673	3	0	3,278688525
1841	0	674	0	1	11,95652174
1842	0	674	3	1	14,63414634
1843	0	675	0	0	9,615384615
1844	0	676	0	1	4,761904762
1845	0	676	1	1	0
1846	0	676	3	1	0
1847	0	677	0	1	3,75
1848	0	677	2	1	4,761904762
1849	0	677	4	1	6,52173913
1850	0	678	0	1	1,785714286
1851	0	678	1	1	3,50877193
1852	0	678	3	1	2
1853	0	679	0	0	7,352941176
1854	0	679	2	0	6,857142857
1855	0	680	0	0	5,128205128
1856	0	680	2	0	4,615384615
1857	0	681	0	0	3,614457831
1858	0	681	2	0	5,46875
1859	0	682	0	0	2,884615385
1860	0	682	1	0	1,388888889
1861	0	682	3	0	1,550387597
1862	0	683	0	0	3,03030303
1863	0	683	5	0	8,860759494
1864	0	683	6	0	5,747126437
1865	0	683	7	0	5,940594059
1866	0	684	0	0	0
1867	0	684	3	0	3,333333333
1868	0	685	0	1	7,792207792
1869	0	685	1	1	10,44776119
1870	0	685	3	1	13,23529412
1871	0	686	0	1	3,546099291
1872	0	686	1	1	2,542372881
1873	0	686	2	1	2,409638554
1874	0	686	4	1	2,739726027
1875	0	687	0	1	6,086956522
1876	0	687	3	1	2,678571429
1877	0	688	0	0	9,230769231
1878	0	688	1	0	5,633802817
1879	0	689	1	0	4,255319149
1880	0	689	3	0	2
1881	0	690	0	1	4,054054054
1882	0	690	2	1	3,846153846
1883	0	691	1	0	1,307189542
1884	0	691	2	0	2,97029703
1885	0	692	0	0	4,929577465
1886	0	692	2	0	6,329113924
1887	0	693	0	1	2,43902439
1888	0	693	3	1	10
1889	0	694	0	0	3,738317757
1890	0	694	1	0	5,113636364
1891	0	694	3	0	7,96812749
1892	0	695	3	1	8,333333333
1893	0	695	4	1	10
1894	0	695	5	1	10,57692308
1895	0	695	6	1	14,4278607
1896	0	695	7	1	5,555555556
1897	0	696	3	1	0
1898	0	696	3	1	2,727272727
1899	0	696	3	1	4,444444444
1900	0	696	3	1	1,941747573
1901	0	696	20	1	0,617283951
1902	0	696	21	1	1,176470588
1903	0	696	22	1	1,020408163
1904	0	696	23	1	0,602409639
1905	0	696	24	1	0,617283951
1906	0	697	2	0
1907	0	697	3	0
1908	0	698	20	1	0
1909	0	698	21	1	0,793650794
1910	0	698	22	1	0
1911	0	698	23	1	0,925925926
1912	0	698	24	1	2,479338843
1913	0	698	25	1	2,06185567
1914	0	698	26	1	2,654867257
1916	0	700	0	0	0
1928	0	703	2	1	1,639344262
1929	0	703	3	1	7,627118644
1930	0	703	4	1	9,836065574
1931	0	703	5	1	6,18556701
1932	0	703	6	1	6,363636364
1933	0	703	7	1	5,217391304
1934	0	703	8	1	4,347826087
1935	0	704	2	1	1,960784314
1936	0	704	3	1	5,691056911
1937	0	704	4	1	5,839416058
1938	0	704	5	1	4,166666667
1939	0	704	6	1	3,96039604
1940	0	704	7	1	7,407407407
1941	0	704	8	1	2,912621359
1942	0	705	1	1	2,112676056
1943	0	705	3	1	2,013422819
1944	0	705	4	1	1,298701299
1945	0	705	5	1	1,639344262
1946	0	705	6	1	1,19760479
1947	0	706	5	0
1948	0	707	3	0	0
1949	0	707	5	0
1950	0	708	0	0	2,941176471
1951	0	709	0	1	7,843137255
1952	0	709	1	1	5
1953	0	709	2	1	4,938271605
1954	0	709	3	1	7,936507937
1955	0	709	4	1	6,578947368
1956	0	710	1	1	1,785714286
1957	0	710	1	1	6,024096386
1958	0	710	2	1	17,54385965
1959	0	710	4	1	8,163265306
1960	0	711	3	1	8,510638298
1961	0	711	3	1	6,666666667
1962	0	711	4	1	7,936507937
1963	0	712	0	1	8
1964	0	712	1	1	4,724409449
1965	0	712	2	1	5,217391304
1966	0	712	3	1	3,846153846
1967	0	712	4	1	2,739726027
1968	0	713	0	0	0,543478261
1969	0	714	3	0	2,247191011
1970	0	715	1	0	2,840909091
1971	0	716	3	0	0
1972	0	717	0	1	4,12371134
1973	0	717	0	1	5,084745763
1974	0	717	1	1	4,838709677
1975	0	717	2	1	6,976744186
1976	0	718	0	1	8,571428571
1977	0	718	1	1	15,625
1978	0	718	2	1	5,042016807
1979	0	719	0	0	1,052631579
1980	0	720	0	0	0
1981	0	721	0	1	5,555555556
1982	0	721	1	1	3,141361257
1983	0	722	0	0	6,593406593
1984	0	723	0	1	4,166666667
1985	0	723	1	1	2,985074627
1986	0	724	1	1	6,666666667
1987	0	724	1	1	6,451612903
1988	0	725	0	1	3,571428571
1989	0	726	0	1	5,6
1991	0	728	0	0	1,219512195
1992	0	729	0	1	7,279693487
1993	0	729	0	1	6,355932203
1994	0	730	0	1	15,625
1995	0	730	1	1	7,792207792
1996	0	730	2	1	10,41666667
1997	0	730	3	1	6,329113924
1998	0	730	4	1	6,153846154
1999	0	731	1	0	0,934579439
2000	0	732	0	0	4,054054054
2001	0	733	0	1	5,833333333
2002	0	734	0	0	0
2003	0	735	4	1	4,255319149
2004	0	735	4	1	4,545454545
2005	0	735	5	1	4,87804878
2006	0	735	6	1	2,380952381
2007	0	735	7	1	2,53164557
2008	0	735	8	1	1,639344262
2009	0	735	9	1	2,197802198
2010	0	736	0	0	2,097902098
2011	0	737	0	1	9,523809524
2012	0	737	1	1	7,894736842
2013	0	737	2	1	4,95049505
2014	0	738	0	0	3,157894737
2015	0	739	2	1
2016	0	739	4	1
2017	0	740	1	0	6,25
2018	0	740	2	0	4,587155963
[truncated: 589 more rows]
