# Supplementary material for: A novel haemocytometric COVID-19 prognostic score developed and validated in an observational multicentre European hospital-based study
Source: eLife journal article supplement (doi:10.7554/elife.63195), 2020-11-26
Supplement: supp [file elife-63195-supp-v1.zip › elife_poa_e63195_Figure_3_source_data_4.csv]

Figure 3 � source data file 3. Source data for trends of RE-LYMPH minus AS-LYMPH asa percentage of total lymphocytes over 14 days of hospitalisation in critical/fatal (CF) and non-critical (NC) patients
Filename	exclusion	Pat_ID	length_of_hospitalisation	Critical_or_Fatal	AS-LYMP%L(%)	RE-LYMP%L(%)	Re-Lymph-T%L
1	0	1	0	1	2,5	6,1	3,640983607
2	0	1	2	1	3,4	7,6	4,151724138
3	0	1	2	1	0	7,8	5,213793103
4	0	1	3	1	3	10	7
5	0	1	4	1	4,3	12,1	7,789655172
6	0	1	15	1	0	11,5	8,797297297
7	0	2	0	0	6,2	11,3	5,11443299
8	0	2	1	0	5	10,6	5,635460993
9	0	2	2	0	3,1	8,6	5,475
10	0	2	3	0	0	8	5,714285714
11	0	2	4	0	0	7,6	6,178199052
12	0	2	6	0	0	5,7	5,226066351
13	0	3	0	1	0	13,5	9,445945946
14	0	3	1	1	5,7	15,2	9,485714286
15	0	3	1	1	2,7	10,8	8,097297297
16	0	3	2	1	5,3	14,7	9,366666667
17	0	3	3	1	7,7	18,3	10,60769231
18	0	3	4	1	10,4	25,4	14,95223881
19	0	3	4	1	9,7	27,4	17,72258065
20	0	3	5	1	9,7	27,8	18,07777778
21	0	3	6	1	0	23,8	17,13333333
22	0	3	7	1	0	31,2	26,89892473
23	0	3	8	1	0	29,7	26,0963964
24	0	3	9	1	0	29,9	26,71528662
25	0	3	10	1	0	25	22,91666667
26	0	3	11	1	0	24,1	22,68156028
27	0	3	12	1	0	26,7	25,70990099
28	0	3	13	1	0	24,2	22,58709677
29	0	4	0	1	0	1,4	1,4
30	0	4	1	1	0	14,3	9,538095238
31	0	4	1	1	0	2,8	2,8
32	0	4	2	1	0	2,5	2,5
33	0	4	3	1	0	6,7	6,7
34	0	4	4	1	0	12,5	12,5
35	0	4	5	1	10	20	10
36	0	4	6	1	6,9	20,7	13,80344828
37	0	4	7	1	7,3	22	14,68292683
38	0	4	8	1	29,3	48,8	19,53170732
39	0	4	9	1	36,1	61,1	24,98888889
40	0	4	10	1	27,8	59,8	31,96494845
41	0	4	10	1	26,7	60	33,33333333
42	0	4	11	1	16	40	24
43	0	4	12	1	0	33,3	26,81851852
44	0	4	13	1	0	23,3	18,85555556
45	0	4	14	1	0	22,2	16,97124183
46	0	5	0	0	0	10,3	10,3
47	0	5	1	0	0	24	24
48	0	6	0	0	9,9	21,1	11,24084507
49	0	6	2	0	10,3	20,7	10,35517241
50	0	6	3	0	8,6	24,3	15,72857143
51	0	6	5	0	10,3	25,6	15,34358974
52	0	7	0	0	6,9	20	13,07692308
53	0	7	2	0	4,2	12,2	7,967195767
54	0	7	3	0	8,7	17,4	8,704347826
55	0	7	4	0	8,1	15,6	7,507514451
56	0	7	5	0	0	14,6	10,50643275
57	0	7	6	0	0	13,7	11,31904762
58	0	8	1	0	0	8,9	7,634177215
59	0	9	0	0	0	18	16
60	0	9	2	0
61	0	9	3	0	0	24,1	20,65172414
62	0	9	4	0	0	17,3	13,45384615
63	0	9	5	0	0	23,8	19,03809524
64	0	9	7	0	0	19,2	15,35384615
65	0	10	0	1	5,6	11,1	5,544444444
66	0	10	1	1	0	15,2	12,16969697
67	0	10	3	1
68	0	10	4	1	11,1	16,7	5,58888889
69	0	11	0	0	0	2,9	2,9
70	0	11	1	0	0	4,5	4,5
71	0	11	3	0	2	6,1	4,07979798
72	0	12	0	1	0	9,4	9,4
73	0	12	2	1	1,5	5,9	4,429411765
74	0	13	5	1	0	26,5	23,48795181
75	0	13	6	1	0	29,5	27,09036145
76	0	13	7	1	0	26,4	24,10114943
77	0	13	8	1	0	23	21,41269841
78	0	13	9	1	0	16,9	15,42941177
79	0	13	9	1	0	18,2	16,1020979
80	0	13	10	1	0	19,9	17,91324503
81	0	13	11	1	0	15,3	13,59545455
82	0	13	12	1	0	19,8	18,41751152
83	0	13	13	1	0	20,3	18,57586207
84	0	14	1	0	0	10,1	9,375362319
85	0	15	13	1	0	9,7	7,427272727
86	0	15	14	1	0	12,9	10,44601227
87	0	15	15	1	0	9	7,095238095
88	0	15	16	1	0	8,4	5,768421053
89	0	15	17	1	0	11,1	8,002654867
90	0	15	18	1	0	9,5	6,514925373
91	0	15	19	1	0	10	8,007968127
92	0	15	20	1	0	5,7	3,953275109
93	0	16	11	1	0	18,6	15,65882353
94	0	16	12	1	0	22,4	17,69411765
95	0	16	13	1	0	35,7	23,7952381
96	0	16	14	1	0	37,5	29,16666667
97	0	16	15	1	0	27,4	20,14193548
98	0	16	16	1	12,8	36,5	23,67948718
99	0	16	17	1	16,3	35,4	19,07346939
100	0	16	18	1	0	22,2	14,79259259
101	0	16	19	1	0	22,9	17,18571429
102	0	17	1	0
103	0	17	2	0	0	10,6	8,472340426
104	0	17	4	0	0	12,2	9,497297297
105	0	18	0	1	3,7	11,1	7,396296296
106	0	18	2	1	0	5,1	3,834177215
107	0	18	2	1	3,4	6,9	3,451724138
108	0	18	3	1	10,5	22,8	12,27368421
109	0	18	4	1	7,5	19,4	11,93731343
110	0	19	0	1	2,8	5,6	2,822222222
111	0	19	1	1	2,9	5,8	2,922302158
112	0	19	3	1	3,2	5,7	2,515286624
113	0	20	0	0	0	9,6	7,472340426
114	0	20	1	0	0	11,3	9,881560284
115	0	20	3	0	0	13,4	10,72142857
116	0	21	0	1
117	0	22	0	0	0	7,1	6,215044248
118	0	23	0	0	6,7	11,1	4,433333333
119	0	24	0	0	0	11,5	9,416666667
120	0	25	0	1
121	0	26	0	0	3,1	6,3	3,175
122	0	27	0	0	0	10	8,888888889
123	0	28	0	0	0	2,4	1,804761905
124	0	29	0	0	6,7	13,5	6,758426966
125	0	30	0	1
126	0	30	4	1	0	9,3	8,137209302
127	0	31	0	0
128	0	32	0	1	0	19,2	15,35384615
129	0	33	0	1	0	5,6	4,211111111
130	0	34	0	1
131	0	35	0	0	0	15	11,8503937
132	0	36	0	1	0	10	9,212598425
133	0	37	0	0	0	9,1	6,827272727
134	0	38	0	1
135	0	39	0	0	8,7	16,3	7,604347826
136	0	40	0	0	0	3,9	2,776404494
137	0	41	0	0	0	12,5	10,15625
138	0	42	0	0	2	5,4	3,439215686
139	0	43	0	0
140	0	44	0	0	0	5	5
141	0	45	0	1	22,9	31,3	8,40843373
142	0	45	1	1
143	0	45	1	1
144	0	45	2	1	9,6	21,2	11,58461539
145	0	45	3	1
146	0	45	4	1	0	20,9	13,92325581
147	0	45	5	1	0	16,8	12,8
148	0	45	5	1
149	0	45	6	1	0	13,2	9,69122807
150	0	45	6	1
151	0	45	7	1	0	21,7	18,08554217
152	0	45	7	1
153	0	45	8	1	0	23	17,5945946
154	0	45	9	1	0	25	18,42105263
155	0	45	10	1	0	24,4	17,08292683
156	0	45	11	1	7,1	20,4	13,25714286
157	0	45	12	1	7,4	20,4	12,99259259
158	0	45	13	1	0	27,3	19,3
159	0	45	14	1	0	32	23,15646259
160	0	45	15	1	0	19,9	14,60198676
161	0	45	16	1	0	16	10,44444444
162	0	45	17	1	6	16,5	10,48496241
163	0	45	18	1	0	17,8	13,85263158
164	0	45	19	1	0	17	12,74468085
165	0	45	20	1	0	14,2	10,4962963
166	0	45	21	1	0	16,8	12,60838323
167	0	45	22	1	0	22,4	18,15757576
168	0	46	0	0	0	10,9	8,726086957
169	0	47	0	0	0	5,8	4,350724638
170	0	48	0	1	0	18,4	13,13684211
171	0	49	0	1
172	0	50	0	0	0	2,7	2,7
173	0	51	0	0	5	13	8
174	0	52	0	1
175	0	53	0	1
176	0	54	0	1	0	16,3	11,3
177	0	54	4	1	8,7	14,5	5,804347826
178	0	54	10	1	12,1	24,1	12,03103448
179	0	54	11	1	0	23	16,44262295
180	0	55	0	0	0	9,7	7,758252427
181	0	56	0	1	10,5	14	3,53488372
182	0	57	0	0	0	5,9	5,9
183	0	58	0	0	0	8	6
184	0	59	0	0	1,6	5,5	3,92519685
185	0	60	0	0	4,8	11,3	6,461290323
186	0	61	0	0	7,2	10,1	2,905755396
187	0	62	0	1	0	13	9,103896104
188	0	63	0	0	4,5	8	3,535714286
189	0	64	0	0	0	7,7	6,601098901
190	0	65	0	0
191	0	66	0	1	0	20,3	18,7375
192	0	67	0	0
193	0	68	0	0
194	0	69	0	0	0	11,5	7,653846154
195	0	70	0	0	0	15	12,5
196	0	71	0	0	2,3	6,8	4,527272727
197	0	72	0	0	0	5	3,333333333
198	0	73	0	0	0	13,7	10,47419355
199	0	74	0	0
200	0	75	0	0	2,5	6,3	3,8
201	0	76	0	0
202	0	77	0	0	0	10,1	8,834177215
203	0	78	0	1	9,1	14,5	5,409090909
204	0	79	0	0	0	17,6	16,24864865
205	0	79	0	0
206	0	79	1	0
207	0	79	2	0
208	0	79	3	0	0	9,8	8,296240602
209	0	79	5	0
210	0	79	7	0
211	0	79	8	0	0	10,3	7,713793103
212	0	79	9	0
213	0	79	10	0	0	9,5	8,447368421
214	0	79	12	0	0	7,5	6,424731183
215	0	80	0	0	6,1	10,2	4,07755102
216	0	81	0	1	0	3,2	3,2
217	0	82	0	0	6,3	14,1	7,85
218	0	83	0	0	0	13,3	12,18888889
220	0	85	0	1	0	10	10
221	0	86	0	1	5,1	12,7	7,636708861
222	0	87	0	0	0	7,8	6,075862069
223	0	88	0	0
225	0	90	0	0
226	0	91	0	0	15,3	18,6	3,34576271
227	0	92	0	0	0	12,1	9,06969697
228	0	93	0	1	6,5	10,9	4,37826087
229	0	93	1	1
230	0	93	2	1	13,2	20,6	7,36470588
231	0	94	0	0	3,2	7,2	4
232	0	95	0	0
233	0	96	0	1	2,7	5,4	2,697297297
234	0	97	0	0	3,3	6,7	3,366666667
235	0	98	0	0
236	0	98	2	0	5,6	12,1	6,492523364
237	0	98	4	0
238	0	98	5	0
239	0	98	13	0	0	14,6	12,68917198
240	0	99	0	1	3,8	9,2	5,353846154
241	0	99	1	1	0	7,9	5,913245033
242	0	99	2	1
243	0	99	3	1
244	0	99	4	1
245	0	99	5	1
246	0	100	0	1	0	12,3	9,560273973
247	0	101	0	1	5	13,8	8,8
248	0	102	0	0	9,7	16,1	6,422580645
249	0	103	0	1	0	11,1	7,396296296
250	0	103	1	1	2,2	4,4	2,177777778
251	0	104	0	1	8,1	13,5	5,391891892
252	0	105	0	0
253	0	106	0	1
254	0	107	0	0	0	4,8	4,8
255	0	108	0	0	0	9,9	6,92970297
256	0	109	0	1	5,2	13,5	8,291666667
257	0	110	0	0	5	10	5
258	0	110	1	0
259	0	110	2	0
260	0	110	3	0
261	0	110	4	0
262	0	110	5	0
263	0	110	6	0
264	0	110	7	0
265	0	110	7	0
266	0	110	8	0	0	18,3	15,07419355
267	0	110	9	0	0	19,7	16,42131148
268	0	110	10	0	0	11,5	9,860655738
269	0	110	11	0	0	11	9,42519685
270	0	110	12	0	0	9,7	6,922222222
271	0	110	13	0	0	13,1	10,34137931
272	0	110	16	0	0	7,3	6,170056497
273	0	110	17	0	0	6,9	5,65
274	0	110	20	0	0	4,9	3,929126214
275	0	111	0	0	6,3	12,5	6,25
276	0	112	0	0	5,1	9,1	4,049494949
277	0	113	0	0	4,1	8,2	4,118367347
278	0	114	0	1	0	9,3	7,966666667
279	0	115	0	1	7,1	11	3,913385827
280	0	116	0	1	1,9	5,2	3,264516129
281	0	117	0	0	0	3,7	2,480487805
282	0	118	0	1
283	0	119	0	1	20	25,3	5,3
284	0	120	0	1
285	0	121	0	1	0	4,2	4,2
286	0	122	0	0	5,3	9	3,736842105
287	0	122	4	0
288	0	122	7	0
289	0	122	9	0
290	0	123	0	1	9,8	12,8	3,02556391
291	0	124	0	0	9,3	15	5,654205607
292	0	125	0	0	7,6	10,2	2,556687898
293	0	126	0	1
294	0	126	2	1	8,2	16,4	8,180821918
295	0	127	0	0	0	9,6	7,472340426
296	0	127	4	0	6,2	11,6	5,435616438
297	0	128	0	1	2,6	9,1	6,502597403
298	0	129	0	0	0	4,3	3,224731183
299	0	130	0	1
300	0	131	0	1
301	0	132	0	1	4	10,7	6,7
302	0	133	0	1	0	17,4	15,07441861
303	0	134	0	1	0	17,5	17,5
304	0	134	2	1	0	20	20
305	0	134	3	1
306	0	135	0	0
307	0	136	0	0	6	14	8
308	0	136	5	0
309	0	136	7	0	14,5	27,3	12,75454545
310	0	136	8	0
311	0	136	9	0	9,8	23,5	13,69607843
312	0	136	10	0	7	21,1	14,08245614
313	0	136	11	0	7,7	19,2	11,50769231
314	0	136	12	0	0	18	13,50561798
315	0	136	13	0	0	13,5	10,7972973
316	0	136	14	0	0	14,2	9,775221239
317	0	137	0	1	12,7	20	7,27272727
318	0	137	1	1	5,8	11,6	5,802898551
319	0	137	2	1
320	0	137	4	1	10,7	17,9	7,18571429
321	0	138	0	0	0	12,3	9,830864198
322	0	139	0	0	0	6,1	4,584848485
323	0	140	0	0	0	16,1	13,18029197
324	0	140	2	0	0	10,8	8,3
325	0	140	6	0	0	20	14,375
326	0	141	0	0	0	11,6	10,15072464
327	0	142	0	1	9,2	16,9	7,669230769
328	0	143	0	1	6,2	9,3	3,11443299
329	0	144	0	0	0	11	9,780487805
330	0	145	0	0	4,8	8,7	3,892307692
331	0	146	0	0	4,4	10,3	5,888235294
332	0	147	0	1
333	0	148	0	1
334	0	149	0	0	2,8	6,5	3,696261682
335	0	150	0	1	4,5	9	4,52238806
336	0	151	0	1	2,6	6,4	3,835897436
337	0	152	0	0	0	2,9	2,9
338	0	153	0	0	0	13,5	13,5
339	0	154	0	0	0	3,9	2,601298701
340	0	155	0	0	0	9,6	8,230136986
341	0	156	0	0	11,5	17,7	6,24166667
342	0	157	0	1	0	3,8	2,534177215
343	0	158	0	0	6,9	10,8	3,937254902
344	0	159	0	0
345	0	160	0	0	0	8,8	7,2
346	0	161	0	1	0	7,7	6,291549296
347	0	162	0	1	2,9	7,4	4,458823529
348	0	163	0	0	0	11,7	8,096396396
349	0	164	0	1	0	13,5	12,14864865
350	0	165	0	1	0	24,2	22,68484849
351	0	166	0	1	0	6,8	5,952542373
352	0	167	0	0	12,7	25,4	12,7015873
353	0	168	0	0
355	0	170	0	0	6,7	17,8	11,13333333
356	0	171	0	0	0	17,5	16,66666667
357	0	172	0	0	3,9	5,2	1,278431373
358	0	173	0	1	6,3	14,3	7,950793651
359	0	174	0	0	9,9	22,7	12,77092199
360	0	175	0	1	0	9	6,435897436
361	0	176	0	0	2,5	5,7	3,152229299
362	0	177	0	0	0	11,8	10,32941177
363	0	178	0	1	0	7	5
364	0	179	0	0	0	10,9	10,9
365	0	179	2	0
366	0	179	3	0
367	0	179	5	0	3,8	11,3	7,526415094
368	0	179	6	0
369	0	179	6	0
370	0	179	7	0
371	0	179	8	0
372	0	179	9	0	10	25	15
373	0	179	10	0	9,5	21,4	11,87619048
374	0	179	11	0
375	0	179	12	0	0	16,9	13,0038961
376	0	179	13	0
377	0	179	14	0	0	11,1	9,988888889
378	0	179	15	0
379	0	179	16	0	0	6,6	5,780327869
380	0	180	0	1	0	20,3	14,05
381	0	181	0	0	5,4	11,5	6,115384615
382	0	182	0	0	0	4,1	4,1
383	0	183	0	0	6,4	15,6	9,177981651
384	0	184	0	0
385	0	185	0	0	0	7,9	6,776404494
386	0	186	0	1	0	15,9	11,47522124
387	0	187	0	0	4,2	10,4	6,233333333
388	0	188	0	1	0	8,1	6,748648649
389	0	189	0	1	0	13,8	13,8
390	0	189	2	1
391	0	189	4	1	10,2	22,7	12,47272727
392	0	190	0	0	0	5,9	4,830481283
393	0	191	0	0
394	0	192	0	0	9,8	17,1	7,343902439
395	0	193	0	0	0	8,8	6,209326425
396	0	194	0	1	5,8	8,7	2,902898551
397	0	195	0	0	0	1,5	1,5
398	0	196	0	1	0	5,8	5,8
399	0	197	0	0	0	12	10,29059829
400	0	198	0	0	0	13,4	10,2503937
401	0	199	0	1
402	0	200	0	1
403	0	201	0	1	0	17,6	16,42352941
404	0	202	0	1	0	24,1	18,54444444
405	0	203	0	1	0	7,8	5,839215686
406	0	204	0	0	5,6	9,9	4,309937888
407	0	205	0	0	0	18,3	14,64146342
408	0	206	0	0	0	3,7	2,465432099
409	0	207	0	0
410	0	208	0	1
411	0	209	0	0
412	0	210	0	1	15,8	26,3	10,51052632
413	0	211	0	0
414	0	212	0	1
415	0	213	0	1	0	9,6	7,2
416	0	214	0	1	7,7	12,8	5,107692308
417	0	215	0	1	0	5,4	4,313043478
418	0	216	0	0
419	0	216	2	0
420	0	216	3	0
421	0	216	4	0
422	0	216	6	0
423	0	216	7	0
424	0	216	9	0	0	10,3	7,735897436
425	0	217	0	1	0	6,6	5,275496689
426	0	217	3	1	0	11,8	7,598319328
427	0	217	5	1	6,4	15,4	8,98974359
428	0	217	7	1
429	0	218	0	0	0	5	5
430	0	219	0	0	0	10,1	7,578991597
431	0	220	0	1	6,1	8,7	2,613043478
432	0	221	0	0
433	0	222	0	0	0	13	9,103896104
434	0	223	0	1	0	7,6	6,842424242
435	0	224	0	1	0	7,9	5,268421053
436	0	225	0	1
437	0	226	0	0	0	7	5,837209302
438	0	227	0	0	10,4	15,6	5,21038961
439	0	228	0	0	0	14,1	11,06969697
440	0	229	0	0	5,1	16,5	11,43670886
441	0	230	0	0	0	11	8,419354839
442	0	231	0	1	0	4,1	4,1
443	0	232	0	0	2,5	6,3	3,76835443
444	0	233	0	0	0	8,8	6,594117647
445	0	234	0	0	2,4	5,6	3,219047619
446	0	235	0	0	4,8	11,1	6,338095238
447	0	236	0	0	0	12,8	10,23589744
448	0	237	1	1	0	30	20
449	0	237	1	1
450	0	237	1	1	11,1	25,9	14,78888889
451	0	237	2	1
452	0	237	3	1	21,4	35,7	14,27142857
453	0	237	4	1
454	0	237	5	1	47	57,6	10,63030303
455	0	238	11	1	0	21,6	19,2
456	0	238	12	1
457	0	238	13	1	0	11,7	10,17715736
458	0	238	14	1	0	12,9	9,39122807
459	0	238	15	1	0	11,3	7,851724138
460	0	238	16	1	0	9,9	6,758638743
461	0	239	0	0	5,5	13,7	8,220547945
462	0	240	1	0
463	0	240	3	0	15,4	19,2	3,81538462
464	0	240	4	0	15,5	20,7	5,18275862
465	0	241	0	1	34,6	42	7,43209877
466	0	241	0	1
467	0	241	1	1
468	0	241	2	1	22,6	30,6	8,01935484
469	0	241	2	1	23,9	31	7,05633803
470	0	241	3	1	18,5	29,6	11,08148148
471	0	241	4	1	12,5	25	12,5
472	0	241	5	1	9,8	24,6	14,76393443
473	0	241	5	1
474	0	241	6	1	0	27,5	18,80434783
475	0	242	0	1	4,2	8,3	4,133333333
476	0	242	1	1	0	11,4	9,127272727
477	0	242	1	1	5,6	11,1	5,544444444
478	0	242	1	1	0	11,1	7,396296296
479	0	242	2	1	3,6	10,7	7,128571429
480	0	242	2	1
481	0	243	8	1	6,1	11,4	5,339393939
482	0	243	9	1	5	12,9	7,94950495
483	0	243	9	1	7,6	12,1	4,524242424
484	0	243	10	1	6	14,9	8,929850746
485	0	243	11	1	7,1	19,6	12,45714286
486	0	244	2	0	5,9	12,7	6,817647059
487	0	244	6	0	0	9,5	7,310218978
488	0	245	2	1	4,3	10,9	6,552173913
489	0	246	0	0	7,6	13,6	6,024242424
490	0	246	2	0	12	17,3	5,3
491	0	247	2	0	12,5	27,5	15
492	0	247	4	0	11,8	27,5	15,73529412
493	0	247	5	0	12,1	27,3	15,17878788
494	0	247	6	0	10	28,6	18,6
495	0	248	1	0	0	8,5	6,949612403
496	0	248	2	0
497	0	248	3	0
498	0	248	4	0
499	0	249	2	1
500	0	249	3	1	18	28	10
501	0	249	3	1	21,7	27,5	5,76086957
502	0	249	4	1
503	0	249	4	1
504	0	249	4	1	17,9	23,1	5,15128205
505	0	249	5	1
506	0	249	6	1
507	0	249	7	1	10,7	25,3	14,63333333
508	0	250	2	0	3,5	7,9	4,39122807
509	0	250	5	0	7,8	17,7	9,89858156
510	0	250	6	0	7,4	19,9	12,51363636
511	0	251	2	0	0	7,9	5,268421053
512	0	251	3	0	0	8,2	6,01420765
513	0	251	5	0	5,6	12,5	6,944444444
514	0	252	7	1	0	14	10,89922481
515	0	252	8	1	0	14,8	11,0962963
516	0	252	9	1	0	13,6	8,8
517	0	252	10	1	0	14,8	9,870422535
518	0	252	11	1	0	13,2	10,68427673
519	0	252	12	1	0	9,6	7,676923077
520	0	253	6	1	11,8	30,9	19,13529412
521	0	253	7	1	0	17,8	12,32054795
522	0	253	7	1	0	16	12,2962963
523	0	253	7	1	0	22,2	19,42222222
524	0	253	7	1	0	15,9	11,55217391
525	0	253	8	1	0	9,3	5,811627907
526	0	253	9	1	0	10,8	8,097297297
527	0	254	6	1	6,3	18,8	12,55
528	0	255	6	0	0	26,4	21,80229885
529	0	255	7	0	0	20,4	19,51504425
530	0	255	8	0	0	20	18,70967742
531	0	255	9	0
532	0	255	10	0	0	19,7	19,06305733
533	0	256	1	0	5,1	7,7	2,571794872
534	0	256	2	0	1,8	7,1	5,314285714
535	0	257	1	1	7,5	18,8	11,3
536	0	257	3	1	5,6	11,1	5,544444444
537	0	257	4	1	14,9	21,3	6,40638298
538	0	257	5	1	24,1	29,3	5,16206897
539	0	258	2	0	6,8	12,7	5,920338983
540	0	258	3	0	4,8	8,1	3,261290323
541	0	259	7	0	7,3	15,4	8,082926829
542	0	259	8	0	7,6	16,8	9,166412214
543	0	260	0	1	0	17,9	14,91492537
544	0	260	2	1	0	20,6	17,65882353
545	0	260	4	1	0	17,2	12,02758621
546	0	260	5	1	0	22,9	14,56666667
547	0	260	6	1	6,1	17,1	11,00243902
548	0	261	6	1
549	0	261	7	1
550	0	261	8	1
551	0	261	9	1	0	23,9	17,08181818
552	0	261	11	1	0	24,2	17,60659341
553	0	261	12	1	0	21,4	15,57475728
554	0	261	12	1	0	27,1	20,04117647
555	0	262	2	0
556	0	262	4	0
557	0	262	5	0
558	0	262	6	0	8,5	16,9	8,425423729
559	0	262	7	0	17,1	28	10,92682927
560	0	263	7	0	0	15,5	13,43814433
561	0	263	11	0	0	10,3	10,3
562	0	263	12	0	0	9,8	8,98699187
563	0	264	3	0	4,7	9,4	4,683018868
564	0	264	4	0	0	9	6
565	0	264	5	0	4,1	9,6	5,490410959
566	0	264	7	0	3,2	7,4	4,208510638
567	0	265	0	1	2,2	6,5	4,326086957
568	0	265	1	1	0	3,9	3,9
569	0	265	2	1
570	0	266	0	1	0	9,3	6,207216495
571	0	266	4	1
572	0	266	5	1	0	20	15
573	0	266	6	1
574	0	266	7	1	0	28,6	23,24285714
575	0	267	0	0	3,4	6,8	3,381196581
576	0	267	2	0	5	9,4	4,364028777
577	0	268	2	1	4,4	13,3	8,855555556
578	0	268	2	1	0	14,9	10,42238806
579	0	268	3	1	0	14,8	12,45625
580	0	268	3	1	0	13,4	11,16119403
581	0	269	4	0	0	6,2	5,78677686
582	0	270	3	1	19	42,9	23,85238095
583	0	270	4	1	9,4	25	15,625
584	0	270	5	1	0	28	20
585	0	271	7	1	0	16,1	12,87419355
586	0	271	8	1	0	21,1	15,83684211
587	0	271	9	1	0	19,6	17,42608696
588	0	271	9	1	0	19,6	17,63921569
589	0	272	0	0	0	2,2	1,124731183
590	0	272	2	0	3,4	8,6	5,151724138
591	0	272	5	0	13,1	20,2	7,1047619
592	0	273	0	0
593	0	274	1	0	0	4,3	2,126086957
594	0	274	3	0	0	9,7	6,474193548
595	0	274	4	0	2,3	6,8	4,527272727
596	0	275	2	1
597	0	275	3	1
598	0	275	4	1	9,5	16,7	7,176190476
599	0	275	5	1	15,3	20,3	5,04576271
600	0	275	6	1	20,8	29,2	8,36666667
601	0	275	7	1	22,4	26,5	4,05102041
602	0	276	6	0	0	8,7	5,815384615
603	0	276	8	0	3,4	7,9	4,529213483
604	0	276	9	0	6,5	11,7	5,206493506
605	0	277	2	0	0	12,2	9,591304348
606	0	277	4	0	0	16,7	12,91212121
607	0	277	6	0	0	16,9	14,16775956
608	0	277	7	0	0	18	16,1042654
609	0	278	2	0
610	0	278	3	0	0	10,4	7,414925373
611	0	278	4	0	0	12,7	7,938095238
612	0	279	0	0
613	0	279	2	0
614	0	279	6	0	0	6,4	4,665895954
615	0	279	9	0	0	14,1	9,752173913
616	0	280	0	0	4,7	7,8	3,1125
617	0	281	16	1	0	12,4	11,27640449
618	0	282	5	0	0	17,3	11,96666667
619	0	283	1	1	4,5	11,7	7,195495495
620	0	284	4	0	4,8	9,1	4,251515152
621	0	284	5	0	4,4	11,3	6,897484277
622	0	284	6	0	3,6	8,9	5,349704142
623	0	284	7	0	0	9,6	6,926203209
624	0	285	1	0	3,3	9,1	5,794214876
625	0	285	3	0	5	13,5	8,535460993
626	0	285	4	0	4,9	13,9	9,038888889
627	0	286	0	0	4,2	10,6	6,374647887
628	0	286	2	0	10,6	17,1	6,53089431
629	0	286	3	0	7,2	12,6	5,414371257
630	0	286	5	0	4,6	14,6	9,984615385
631	0	287	4	0	0	4,2	2,791549296
632	0	287	6	0
633	0	288	7	1	0	6,3	5,407142857
634	0	288	8	1	0	11,3	9,413207547
635	0	288	8	1	0	13,5	10,61538462
636	0	288	9	1	0	12,4	9,920661157
637	0	288	9	1	0	11,2	10,4
638	0	288	9	1	0	12,9	11,28709677
639	0	288	9	1	0	6,9	5,743930636
640	0	288	10	1	0	3,7	3,7
641	0	288	11	1
642	0	288	11	1	0	7,7	6,153608247
643	0	288	11	1	0	6,3	4,72519685
644	0	289	2	0	14,3	26,4	12,11428571
645	0	290	2	0	15,4	38,5	23,11538462
646	0	290	4	0	0	34,1	25,00909091
647	0	290	6	0	0	25	15,90909091
648	0	291	2	0	4,5	15,2	10,65454546
649	0	291	4	0	0	15,2	10,14949495
650	0	291	6	0	5,3	14,7	9,436842105
651	0	292	3	1	8,1	15,1	6,960465116
652	0	292	4	1	7,4	12	4,592592593
653	0	292	5	1	7,1	13,3	6,157142857
654	0	293	15	0	10,5	21,1	10,57368421
655	0	293	17	0	5,9	11,8	5,917647059
656	0	294	4	0	6,8	13,6	6,781818182
657	0	294	6	0	7,7	13,5	5,807692308
658	0	294	7	0	6,5	15,2	8,67826087
659	0	295	25	1	13,1	23	9,8852459
660	0	296	3	0	0	7,1	5,335294118
661	0	296	4	0	0	10,7	8,409923664
662	0	297	2	0	5,4	11,6	6,242857143
663	0	297	4	0	3,8	12,3	8,526415094
664	0	298	0	0	4,3	9,9	5,552173913
665	0	298	2	0	3,8	9,6	5,753846154
666	0	298	3	0	6,4	12	5,6
667	0	298	4	0	5,5	14,2	8,688188976
668	0	298	5	0	9,9	17,6	7,74084507
669	0	299	3	0	10	16,3	6,3
670	0	299	5	0	0	13	9,103896104
671	0	299	7	0	0	15,2	10,13670886
672	0	300	2	0	5,9	23,5	17,61764706
673	0	300	3	0	0	14,3	10,72857143
674	0	300	4	0	13,3	26,7	13,36666667
675	0	300	6	0	0	28,6	20,02857143
676	0	301	0	0	0	8,7	7,613043478
677	0	301	9	0	0	13,6	10,4
678	0	301	12	0	0	15,8	12,29122807
679	0	302	2	0	0	21,2	18,16969697
680	0	302	3	0	0	13,7	11,83664596
681	0	302	4	0	0	10,9	9,3375
682	0	303	2	0	0	6,8	5,448648649
683	0	304	2	0
684	0	305	3	0
685	0	305	4	0	9,6	19,2	9,584615385
686	0	306	1	0	9,5	13,1	3,576190476
687	0	307	1	1	0	7,8	6,688888889
688	0	307	3	1	0	8,5	6,805084746
689	0	307	4	1	0	11,7	8,366666667
690	0	308	1	1	0	4,3	4,3
691	0	308	2	1	0	11,4	9,971428571
692	0	309	1	1	0	12	10,66666667
693	0	309	2	1	0	10,9	8,726086957
694	0	309	3	1	0	8,6	7,365432099
695	0	309	3	1	0	10,5	7,868421053
696	0	309	4	1	0	14,3	11,91904762
697	0	310	1	0
698	0	310	3	0	12,6	28,4	15,76842105
699	0	310	4	0	11,7	27,2	15,54951456
700	0	311	2	0	0	14,3	10,01428571
701	0	311	3	0	10,3	21,8	11,54358974
702	0	311	4	0	7,6	19	11,38095238
703	0	312	2	0	0	23,3	18,64883721
704	0	312	3	0
705	0	313	2	0	0	8,4	6,719327731
706	0	313	3	0	0	13,4	10,8789916
707	0	313	4	0	0	12	9,435897436
708	0	314	2	0	2,8	7,4	4,635023041
709	0	314	3	0	0	7,7	5,427272727
710	0	314	4	0	0	11	8,619047619
711	0	315	2	1
712	0	316	2	0
715	0	318	1	0	0	4,1	4,1
716	0	318	2	0
717	0	318	4	0
718	0	318	7	0
719	0	318	9	0	3,3	8,9	5,566666667
720	0	319	2	1	0	17,9	12,77179487
721	0	319	3	1	10,6	25,5	14,86170213
722	0	319	4	1	10,4	23,4	13,01038961
723	0	319	5	1	11	25,6	14,62439024
724	0	319	6	1	0	22	16
725	0	319	9	1	0	13	10,82608696
726	0	319	10	1	0	12,7	9,758823529
727	0	319	11	1	0	12,6	8,996396396
728	0	319	12	1	3,4	10,1	6,748044693
729	0	319	13	1	6,3	15,2	8,95
730	0	320	0	1	8,2	14,3	6,136734694
731	0	321	0	0	0	12,7	8,902531646
732	0	321	3	0	8,8	16,1	7,291709845
733	0	322	0	0	0	7,7	6,161538462
734	0	322	1	0	4,8	9,5	4,738095238
735	0	323	0	0	0	12,4	9,029213483
736	0	323	4	0
737	0	324	3	0
738	0	325	2	0	10,8	25,9	15,10863309
739	0	326	0	1	18,9	27	8,08108108
740	0	326	1	1	6	14	8
741	0	326	2	1	0	21,7	13,00434783
742	0	326	3	1	0	11,6	9,274418605
743	0	326	4	1	0	13,3	11,07777778
744	0	327	1	0	3,8	11,3	7,526415094
745	0	328	2	1	10,4	17,9	7,45223881
746	0	328	3	1
747	0	329	0	0	0	7,2	7,2
748	0	329	1	0	0	5,4	5,4
749	0	329	2	0	0	13,2	12,1010989
750	0	329	3	0	0	6,7	6,7
751	0	330	0	0	0	18,2	13,65454546
752	0	331	8	1
753	0	331	9	1	9,6	17,3	7,684615385
754	0	331	10	1	0	16,7	11,14444444
755	0	331	11	1	5,2	15,5	10,32758621
756	0	331	14	1	6	13,4	7,429850746
757	0	331	15	1	4,1	10,8	6,745945946
758	0	331	16	1	5,1	10,2	5,115254237
759	0	331	17	1	3,5	10,5	6,99122807
760	0	331	18	1	0	7,4	5,548148148
761	0	332	0	1	0	2,9	2,9
762	0	332	0	1	0	1,8	1,8
763	0	333	5	1	0	17,6	14,82222222
764	0	333	6	1	0	17,1	14,24285714
765	0	333	7	1	0	18,6	15,65882353
766	0	334	2	0	0	12,3	9,702597403
767	0	334	3	0	0	10,3	8,481818182
768	0	335	10	1	0	13	12,23664122
769	0	335	11	1	0	5,8	5,070072993
770	0	335	12	1	0	12,1	11,38571429
771	0	335	13	1	0	11,9	10,06513762
772	0	335	14	1	0	16,3	14,99281046
773	0	335	19	1	0	15,8	15,11506849
774	0	335	20	1	0	14,5	13,12068966
775	0	335	21	1	0	11,1	9,914229249
776	0	336	1	1	0	2,9	2,9
777	0	337	0	0
778	0	338	3	0	0	4,4	3,288888889
779	0	339	0	0	0	4,5	4,5
780	0	340	0	0	0	12,8	9,285623003
781	0	341	9	1	5,4	16,2	10,7945946
782	0	341	12	1	6,5	14,3	7,806493506
783	0	341	13	1	6,6	14,5	7,921052632
784	0	341	14	1	6,3	10,1	3,770886076
785	0	341	15	1	6,8	16,9	10,12033898
786	0	341	16	1	6,9	15,3	8,355555556
787	0	341	21	1	20	28	8
788	0	341	22	1	14,3	28,6	14,31428571
789	0	341	23	1	7,7	17,3	9,607692308
790	0	342	0	0	0	6,9	6,9
791	0	343	3	0	14,4	18,3	3,87692308
792	0	344	0	0	0	15,8	14,48421053
793	0	345	2	1
794	0	346	0	0	0	8,6	7,737931034
795	0	346	3	0	4,3	12,8	8,526495726
796	0	347	10	0	12,9	17,4	4,52121212
797	0	347	11	0	6,8	9	2,243243243
798	0	348	3	1	0	6,7	6,7
799	0	348	6	1
800	0	349	4	1	11,2	14,7	3,51118881
801	0	349	4	1	9,6	16,7	7,050877193
802	0	349	5	1	5	12,5	7,5
803	0	349	6	1	0	16,1	11,79892473
804	0	349	7	1	0	13,5	11,41666667
805	0	349	12	1	0	12,5	10,53921569
806	0	349	13	1	0	12,8	10,14042553
807	0	349	14	1	0	13,3	11,24871795
808	0	349	15	1	0	12,1	10,52105263
809	0	350	5	1	5,7	15,9	10,21818182
810	0	350	8	1	0	21	16,96774194
811	0	350	9	1	0	17,3	14,1503937
812	0	350	10	1	0	18,1	14,47681159
813	0	350	11	1	0	17	13,07843137
814	0	350	12	1	0	16,8	15,4013986
815	0	350	17	1	0	16	14,34254144
816	0	350	18	1	0	20,9	17,99302326
817	0	350	19	1	0	19,7	16,23179191
818	0	351	5	0	4,7	10,5	5,848837209
819	0	352	0	0	4,3	8,7	4,352173913
820	0	352	2	0
821	0	353	2	1
822	0	353	3	1	14,5	20,5	6,04216867
823	0	353	4	1	10	22	12
824	0	354	3	0
825	0	355	1	1
826	0	355	5	1	0	16	12
827	0	355	6	1	0	22,6	16,1483871
828	0	355	7	1	0	23,5	14,67647059
829	0	355	8	1	0	27,3	20,48181818
830	0	355	11	1	6,7	22,2	15,53333333
831	0	355	12	1	0	27,5	20
832	0	355	13	1	0	25,5	21,24468085
833	0	355	14	1	0	24	18
834	0	355	15	1	0	27,7	21,54615385
835	0	356	2	1
836	0	356	5	1	1,4	5,4	4,048648649
837	0	356	6	1	4,2	8,3	4,133333333
838	0	356	7	1	4,2	8,4	4,189473684
839	0	356	8	1	5,4	10,9	5,465217391
840	0	356	9	1	4,5	12,1	7,554545455
841	0	356	12	1	0	11,6	9,426086957
842	0	356	13	1	0	11,4	8,96097561
843	0	356	14	1	0	6,3	4,891549296
844	0	356	15	1	0	5	4,159663866
845	0	356	16	1	0	5,6	4,806349206
846	0	357	0	0	3,4	9,1	5,690909091
847	0	358	0	0	0	3,5	3,059471366
848	0	359	1	0
849	0	359	3	0	4	10	6
850	0	359	9	0	0	8,6	6,301149425
851	0	360	1	1	2,7	6,3	3,597297297
852	0	360	2	1	1,9	5,1	3,189171975
853	0	360	3	1	2,9	8,8	5,858823529
854	0	360	4	1	4,6	9,2	4,584615385
855	0	360	7	1	0	10,5	7,868421053
856	0	360	8	1	0	8,3	6,917511521
857	0	360	9	1	0	12,3	10,71897233
858	0	360	10	1	0	11,6	9,545205479
859	0	360	10	1	0	9,6	7,914606742
860	0	360	11	1	0	11,1	9,139215686
861	0	361	1	1	6,5	14,5	8,048387097
862	0	361	2	1	9,7	16,1	6,422580645
863	0	361	9	1	0	21,2	18,16969697
864	0	361	10	1	0	18,6	13,51525424
865	0	361	11	1	0	18	12
866	0	362	0	0	0	1,8	1,8
867	0	363	2	0	7,3	19,5	12,18292683
868	0	364	4	0	10,6	17,1	6,53089431
869	0	364	6	0	0	13,8	10,54796748
870	0	365	0	0	3,1	6,1	3,03877551
871	0	365	5	0	6,9	12,5	5,625
872	0	365	6	0	4,8	11	6,238095238
873	0	365	7	0	0	11,2	8,863551402
874	0	365	8	0	0	11,4	8,156756757
875	0	365	9	0	0	11,5	8,895833333
876	0	366	3	0
877	0	367	0	0
878	0	367	2	0
879	0	368	10	1	0	13,1	9,253846154
880	0	369	3	0	7,1	16,1	8,957142857
881	0	369	5	0	6,6	15,8	9,221052632
882	0	369	8	0	0	9,6	6,968421053
883	0	370	0	0	3,1	6,3	3,175
884	0	371	0	0	0	6,1	6,1
885	0	372	5	0	0	12,5	9,722222222
886	0	373	0	0	0	11,6	7,252173913
887	0	374	0	0	0	7,4	7,4
888	0	375	0	0	0	5,9	5,9
889	0	375	2	0	0	7,1	7,1
890	0	375	6	0	0	23,9	17,37826087
891	0	376	0	0	0	20,1	14,92758621
892	0	376	0	0	0	15,3	10,67037037
893	0	377	0	1
894	0	377	1	1	10,7	14,3	3,58571429
895	0	377	2	1
896	0	377	5	1	8,6	21,9	13,32857143
897	0	377	6	1	0	16,7	12,35217391
898	0	377	7	1	0	15,3	11,48320611
899	0	377	8	1	0	10,8	7,922302158
900	0	377	9	1	0	11,5	8,221311475
901	0	378	0	1	6,4	10,3	3,88974359
902	0	378	2	1
903	0	378	3	1
904	0	378	6	1	11,2	21,3	10,06404494
905	0	378	7	1	9,1	21,6	12,50909091
906	0	378	8	1	9,1	24,5	15,40909091
907	0	378	9	1	6,7	17,3	10,56923077
908	0	378	10	1	0	18,1	12,93870968
909	0	379	0	0	3,7	7,4	3,696296296
910	0	380	0	0	0	8,4	6,714606742
911	0	381	2	0
912	0	382	2	1	0	7,8	4,675
913	0	383	4	0
914	0	384	1	1	0	13,9	10,98029197
915	0	384	2	1	0	18,5	15,27419355
916	0	384	5	1	0	14,2	12,42222222
917	0	384	6	1	0	16,3	14,09735683
918	0	384	7	1	0	6,8	5,557763975
919	0	384	8	1	0	11,6	10,6625
920	0	384	8	1	0	10	9,189189189
921	0	385	1	1	0	2,2	2,2
922	0	386	0	0	0	14	11,84946237
923	0	386	1	0	0	20	14,28571429
924	0	387	4	0	10,8	16,7	5,94731183
925	0	388	1	0	0	17,9	17,15373134
926	0	389	2	0
927	0	389	6	0	12	25,3	13,25180723
928	0	390	2	0	12,7	20	7,27272727
929	0	390	6	0	8,3	15,6	7,266666667
930	0	390	10	0	6,3	16,8	10,48421053
931	0	391	0	1	9,4	21,9	12,525
932	0	392	2	1	12,8	17,9	5,07948718
933	0	392	5	1	9,2	19,7	10,48947368
934	0	393	5	0	2,9	4,3	1,442857143
935	0	394	2	0	0	7,5	5
936	0	395	2	0	5,5	12,8	7,312195122
937	0	396	2	0	8	13,6	5,6
938	0	397	2	0	0	6,4	4,971428571
939	0	397	5	0	3,4	8	4,590909091
940	0	398	6	0	0	21	16,0617284
941	0	399	2	0	7,8	13,3	5,522222222
942	0	400	0	0	0	10,9	8,726086957
943	0	400	1	0	0	11,9	8,510169492
944	0	400	4	0	3,4	9,1	5,690909091
945	0	401	4	1
946	0	401	5	1
947	0	401	6	1	7,2	15,5	8,283505155
948	0	401	7	1	8	23	15
949	0	401	8	1	6,5	19,5	12,99593496
950	0	402	3	0	16,8	24,8	8
951	0	403	2	0
952	0	404	2	0
953	0	405	2	1	0	16,3	13,04796748
954	0	405	5	1	8,9	16,5	7,639240506
955	0	405	5	1	5,1	12,2	7,071794872
956	0	405	6	1	3,4	8	4,590909091
957	0	406	0	1	0	8,6	5,742857143
958	0	406	2	1	6	13,3	7,275903614
959	0	406	3	1	4,2	11,6	7,389473684
960	0	406	4	1	4,7	8,2	3,521637427
961	0	407	2	0	2	6	4
962	0	407	6	0	3,7	7,4	3,696296296
963	0	407	7	0	9,5	19	9,476190476
964	0	407	9	0	17,2	24,1	6,85862069
965	0	407	13	0	8,5	19,1	10,5893617
966	0	408	0	0	3,8	6,7	2,853846154
967	0	408	3	0	6,9	11,1	4,155555556
968	0	409	2	0
969	0	409	5	0	11	19,1	8,07058824
970	0	410	0	0	9,4	17	7,566037736
971	0	410	2	0	13,5	18,9	5,38648649
972	0	411	0	0	0	8	6
973	0	412	2	1	0	2,2	2,2
974	0	412	5	1	7,8	12,7	4,856862745
975	0	412	6	1
976	0	413	0	1	0	3,2	3,2
977	0	413	3	1	6,8	13,6	6,820338983
978	0	413	4	1	0	15,3	10,21525424
979	0	413	5	1	0	14	10
980	0	413	6	1	0	21,7	15,03333333
981	0	413	7	1	0	23,5	18,5617284
982	0	414	1	0
983	0	415	1	0	2,9	5,9	2,958823529
984	0	416	0	0	3,4	9,2	5,751724138
985	0	416	1	0	2,1	6,2	4,13814433
986	0	417	0	0	0	13,8	10,78275862
987	0	417	1	0	0	12,2	10,39004525
988	0	417	2	0	0	14,9	13,03953488
989	0	417	4	0	0	16,8	14,56536313
990	0	417	7	0	0	9,8	7,73814433
991	0	417	9	0	0	9,4	7,98490566
992	0	418	13	0
993	0	418	14	0
994	0	418	17	0	7,4	13	5,592592593
995	0	418	18	0	5,1	11,9	6,815254237
996	0	418	19	0	7,7	15,4	7,707692308
997	0	418	21	0	0	14	12
998	0	418	24	0	0	11,8	11,8
999	0	418	26	0	0	5,9	5,9
1000	0	419	0	0	3,7	7,3	3,641463415
1001	0	419	2	0	7,7	15,4	7,707692308
1002	0	419	3	0	4,2	8,4	4,189473684
1003	0	420	0	1	5,6	9,3	3,744444444
1004	0	420	1	1	3,2	8,5	5,308510638
1005	0	421	0	1
1006	0	421	0	1	0	6,1	6,1
1007	0	422	0	1	0	13,2	10,56842105
1008	0	422	1	1	0	10,8	8,097297297
1009	0	422	2	1	0	5,4	5,4
1010	0	423	0	1	10,4	17,9	7,45223881
1011	0	423	2	1	11,4	20	8,57142857
1012	0	423	4	1
1013	0	424	0	0	4,2	12,5	8,333333333
1014	0	424	1	0
1015	0	424	5	0	10,5	17,5	6,97368421
1016	0	424	7	0	5,4	16,1	10,74285714
1017	0	425	12	1
1018	0	426	0	1	4,1	10,3	6,17628866
1019	0	427	0	1
1020	0	427	1	1
1021	0	428	0	0
1022	0	428	3	0	2,5	4,9	2,430864198
1023	0	428	4	0
1024	0	428	6	0
1025	0	429	0	1	0	8,1	6,937209302
1026	0	429	1	1	0	9,5	8,040145985
1027	0	429	2	1	0	9,8	8,907142857
1028	0	429	5	1	0	12,3	11,48032787
1029	0	429	8	1	2,4	5,7	3,26097561
1030	0	429	11	1	0	14	9,348837209
1031	0	430	1	1
1032	0	431	0	0	0	7,2	5,995180723
1033	0	432	0	0	0	5,9	4,919607843
1034	0	432	1	0	0	6,5	5,201298701
1035	0	432	3	0	0	7,9	6,974074074
1036	0	433	0	0	6	14,5	8,475903614
1037	0	433	1	0	7,1	16,2	9,129292929
1038	0	433	2	0	7,4	17,3	9,892592593
1039	0	434	0	0
1040	0	434	1	0
1041	0	434	3	0
1042	0	434	5	0	8,2	24,6	16,40327869
1043	0	434	7	0	7,5	19,4	11,87311828
1044	0	435	8	0	0	15,7	15,7
1045	0	435	11	0	0	7,3	6,48699187
1046	0	436	0	1	2,2	5,1	2,894117647
1047	0	437	0	1
1048	0	437	2	1	6,2	15,4	9,246153846
1049	0	438	0	0	2,7	6,4	3,672727273
1050	0	438	2	0	4,1	8,1	4,045945946
1051	0	438	4	0	4,6	10,3	5,702298851
1052	0	439	0	1	13	18,5	5,53703704
1053	0	439	2	1	24,2	25,8	1,63333333
1054	0	440	2	0	1,9	5,7	3,795238095
1055	0	441	0	0	0	17,6	12,69803922
1056	0	441	1	0	0	14,9	10,42238806
1057	0	441	3	0	0	15,6	11,01284404
1058	0	442	0	1	2,3	5,1	2,840112994
1059	0	442	1	1	3	7,8	4,814925373
1060	0	442	2	1	4,2	8,3	4,133333333
1061	0	442	3	1	3,9	6,4	2,4591133
1062	0	442	6	1
1063	0	443	0	1	6,3	9,4	3,15
1064	0	443	2	1	0	6,7	4,477777778
1065	0	443	4	1	0	5,7	5,7
1066	0	443	5	1	0	9,8	7,36097561
1067	0	444	0	1	10,6	14,6	4,03089431
1068	0	444	1	1	12,3	19,2	6,87123288
1069	0	445	0	0
1070	0	445	1	0
1071	0	445	6	0	8,3	22,6	14,26666667
1072	0	445	8	0	0	20,5	14,25
1073	0	445	10	0	0	8,5	6,192307692
1074	0	445	13	0	1	2	0,98989899
1075	0	446	2	1	0	8,1	6,07979798
1076	0	446	6	1	3,5	9,9	6,378873239
1077	0	446	8	1	2,4	7,3	4,86097561
1078	0	446	11	1	0	9,9	7,420661157
1079	0	446	18	1	0	17,3	14,57272727
1080	0	446	20	1	0	17	14,32142857
1081	0	447	1	0
1082	0	447	3	0	11,4	18,2	6,83636364
1083	0	447	6	0	0	21,7	17,35217391
1084	0	447	8	0	0	19,8	16,31162791
1085	0	447	10	0	0	19,2	16,46027397
1086	0	447	13	0	0	9,6	8,230136986
1087	0	448	0	0	3,8	8,5	4,726415094
1088	0	448	2	0	5,7	9,5	3,785714286
1089	0	449	0	0	2,7	6,8	4,060273973
1090	0	449	1	0	2,7	5,4	2,697297297
1091	0	449	4	0	10	15	5
1092	0	449	6	0	0	13,7	9,778431373
1093	0	449	8	0	3,9	11,2	7,252631579
1094	0	450	0	0	6,3	14,6	8,35
1095	0	450	2	0
1096	0	450	3	0	7	16	9
1097	0	450	5	0	0	10,2	9,274074074
1098	0	451	0	0	0	15,2	10,12753623
1099	0	452	0	1	1,9	5,8	3,876923077
1100	0	453	0	1	4,8	6,5	1,661290323
1101	0	453	4	1
1102	0	453	6	1	14,7	26,5	11,79411765
1103	0	453	8	1	9,8	26,8	17,04390244
1104	0	454	7	0	6,2	17,7	11,50530974
1105	0	454	10	0	3,2	9,1	5,89144385
1106	0	455	0	1	0	6,9	5,642138365
1107	0	455	2	1	4,7	9,4	4,694117647
1108	0	455	4	1	5,2	10,4	5,205194805
1109	0	456	0	0
1110	0	456	4	0	0	16,5	13,45121951
1111	0	457	1	0
1112	0	457	3	0
1113	0	457	5	0	0	10	7,5
1114	0	457	8	0	0	19,1	16,15882353
1115	0	457	10	0	0	14	11,84946237
1116	0	457	12	0	0	18,8	17,2962406
1117	0	458	0	0	8,2	14,1	5,864705882
1118	0	458	1	0	3,8	11,5	7,653846154
1119	0	459	0	1	15,7	19,6	3,91372549
1120	0	460	0	1	3,6	10,9	7,263636364
1121	0	460	2	1
1122	0	461	0	0	0	14,9	12,77234043
1123	0	461	3	0	0	13,8	10,72307692
1124	0	462	1	0	9,2	21,5	12,26923077
1125	0	463	0	1	12,7	15,9	3,2015873
1126	0	464	0	0	8,3	13,2	4,866666667
1127	0	464	1	0	5	10,6	5,635460993
1128	0	464	3	0	3,5	10,5	6,99122807
1129	0	465	0	0	0	9,4	8,358333333
1130	0	465	3	0	0	12,7	9,535443038
1131	0	466	0	0	4,4	13,3	8,855555556
1132	0	467	0	0	5,6	8,5	2,866197183
1133	0	468	0	1	9,5	14,3	4,776190476
1134	0	468	1	1	4,2	8,4	4,18313253
1135	0	469	0	0
1136	0	469	1	0	0	12	12
1137	0	470	0	0	0	4,5	3,201298701
1138	0	471	0	0	0	11,1	7,766666667
1139	0	471	1	0
1140	0	471	4	0	14,3	20,9	6,61428571
1141	0	472	0	1	0	12,9	10,96451613
1143	0	472	11	1	0	19,6	15,67843137
1144	0	472	13	1	0	15,1	11,32641509
1145	0	473	0	1	0	9,4	7,8375
1146	0	473	1	1	0	14,4	13,29502762
1147	0	473	3	1	0	3,4	3,4
1148	0	474	3	0	2,8	8,3	5,547706422
1149	0	474	5	0	0	9,3	6,974418605
1150	0	475	0	1	0	12,1	9,06969697
1151	0	476	0	0
1152	0	476	1	0
1153	0	477	0	1	0	16,4	10,94545455
1154	0	477	4	1	10,9	19,6	8,73043478
1155	0	477	6	1
1156	0	477	8	1	0	25,7	17,12857143
1157	0	477	10	1	0	34	24
1158	0	478	0	0	0	3,6	2,40952381
1159	0	478	1	0	0	2,6	2,6
1160	0	478	4	0	2,2	5,1	2,926086957
1161	0	479	0	0
1162	0	479	2	0
1163	0	479	4	0
1164	0	479	7	0	6	16,2	10,24255319
1165	0	480	0	0
1166	0	480	1	0	8,1	9,9	1,760465116
1167	0	480	4	0	15,2	17,9	2,72142857
1168	0	480	6	0	11,7	22,5	10,78828829
1169	0	481	0	0
1170	0	482	0	0
1171	0	483	2	1	3,8	11,3	7,526415094
1172	0	484	0	0	0	3,1	3,1
1173	0	484	1	0	0	10,6	8,472340426
1174	0	485	0	0	7,2	11,6	4,353623188
1175	0	485	2	0	7,5	12,7	5,237313433
1176	0	485	5	0	7,3	14,5	7,227272727
1177	0	485	7	0	0	15,1	10,44883721
1178	0	485	9	0	2,3	8,1	5,774418605
1179	0	486	0	0	0	7,7	6,301398601
1180	0	486	3	0
1181	0	487	0	1	0	7,6	6,334177215
1182	0	487	1	1	0	11,4	9,127272727
1183	0	487	3	1	0	4,2	4,2
1184	0	487	5	1	2,9	8,6	5,742857143
1185	0	488	0	1	0	11,1	7,396296296
1186	0	488	2	1	0	5	5
1187	0	488	4	1	0	5	5
1188	0	488	7	1	0	7,4	7,4
1189	0	489	0	0	3,9	8,7	4,816504854
1190	0	489	4	0	5,3	10,5	5,236842105
1191	0	490	4	0	4,1	9,8	5,701639344
1192	0	490	7	0	0	11	7,788990826
1193	0	491	1	1	12,5	17,9	5,4
1194	0	491	2	1	4,8	6,3	1,538095238
1195	0	491	3	1	6,9	13,8	6,903448276
1196	0	491	6	1	6,1	12,1	6,039393939
1197	0	491	8	1	0	11,4	8,86835443
1198	0	491	10	1	0	10,5	7,011627907
1199	0	492	0	0
1200	0	492	1	0	2,9	5,1	2,180291971
1201	0	493	0	0
1202	0	493	1	0
1203	0	494	0	0
1204	0	494	2	0	6,5	14,8	8,318518519
1205	0	494	3	0	9,1	20,2	11,10909091
1206	0	495	0	1	15,8	17,5	1,71052632
1207	0	495	2	1	6,1	12,2	6,07755102
1208	0	495	4	1	7,1	16,7	9,557142857
1209	0	495	6	1	8	22	14
1210	0	495	6	1	0	21	16,16129032
1211	0	495	7	1	0	20	15,38461539
1212	0	496	0	1	3,3	5,8	2,494214876
1213	0	496	1	1
1214	0	497	9	1	0	13,2	8,483018868
1215	0	497	12	1	2,6	7	4,368421053
1216	0	498	0	0	12,4	16,9	4,54044944
1217	0	498	1	0	13,3	17,3	4,03469388
1218	0	498	3	0	3	7,9	4,92970297
1219	0	498	5	0	2	6,1	4,059183673
1220	0	499	0	0	0	9,4	5,870588235
1221	0	500	0	1	3,8	7,6	3,802531646
1222	0	500	1	1
1223	0	500	2	1	4,3	10,1	5,752173913
1224	0	500	4	1
1225	0	500	7	1	0	11,5	8,051724138
1226	0	500	9	1	0	9,5	8,30952381
1227	0	501	0	0	0	5,9	5,059663866
1228	0	501	4	0	2,6	6	3,435897436
1229	0	501	6	0	0	8,4	6,719327731
1230	0	501	8	0	0	7,2	6,299099099
1231	0	501	11	0	0	6,9	5,65
1232	0	502	0	0	2,4	5,5	3,137795276
1233	0	503	0	1	0	4,3	4,3
1234	0	503	1	1	2,1	8,3	6,216666667
1235	0	504	0	0	8,7	15,2	6,504347826
1236	0	504	13	0	0	6,9	5,175862069
1237	0	504	15	0	0	5,2	3,901298701
1238	0	504	18	0	1,5	5,9	4,429411765
1239	0	505	0	0
1240	0	506	0	1	2,4	7,1	4,719047619
1241	0	506	2	1
1242	0	507	0	0	0	3,6	2,579591837
1243	0	507	7	0	3,1	6,2	3,099224806
1244	0	508	0	0	7,7	11,5	3,807692308
1245	0	509	0	0	0	3,3	2,466666667
1246	0	510	0	0	6,8	15,9	9,081818182
1247	0	510	2	0	5,8	11,5	5,730769231
1248	0	510	4	0	5,2	13,9	8,682608696
1249	0	510	7	0	0	8	5,810218978
1250	0	511	0	1	10,5	18,6	8,13488372
1251	0	511	1	1
1252	0	512	0	0
1253	0	512	1	0	8,2	15,1	6,880821918
1254	0	512	3	0	22,2	33,3	11,07777778
1255	0	512	5	0	10,3	20,6	10,29072165
1256	0	512	8	0	0	15,4	10,98823529
1257	0	512	12	0	7,6	18,5	10,8566879
1258	0	513	0	1	0	6,4	4,272340426
1259	0	513	1	1
1260	0	513	3	1	5,4	8,1	2,694594595
1261	0	514	0	1	6,5	17,4	10,87826087
1262	0	514	1	1
1263	0	514	3	1
1264	0	514	7	1
1265	0	514	10	1	17,8	40	22,22222222
1266	0	514	11	1	0	30,3	21,05630252
1267	0	514	14	1	10,2	19,1	8,9089172
1268	0	514	16	1	7,6	16,5	8,905063291
1269	0	515	1	0
1270	0	515	4	0	0	14,3	10,4038961
1271	0	516	0	0	4,6	8,4	3,819847328
1272	0	516	1	0
1273	0	516	2	0	4,7	10,7	6,002013423
1274	0	516	4	0	6,7	11,4	4,688590604
1275	0	516	7	0	0	9,6	7,792771084
1276	0	517	0	0	0	10,3	8,23814433
1277	0	517	1	0	0	9,5	7,775862069
1278	0	517	3	0
1279	0	517	5	0	0	14,9	10,30229885
1280	0	517	9	0	0	15,5	11,62403101
1281	0	517	10	0
1282	0	518	0	1
1283	0	519	0	0	2,9	4,4	1,480291971
1284	0	519	4	0	5,1	11,5	6,371794872
1285	0	519	6	0	0	13,8	9,489655172
1286	0	519	8	0	0	3,4	2,552542373
1287	0	520	0	0	5,8	9,7	3,874757282
1288	0	520	3	0	10,9	20,3	9,3625
1289	0	520	5	0	5,6	14,6	8,982022472
1290	0	520	8	0	3,8	10,7	6,883206107
1291	0	521	0	0	0	7,7	7,7
1292	0	522	0	0	0	3,8	2,517948718
1293	0	522	3	0	4,3	10	5,714285714
1294	0	523	0	0	0	11,8	8,438655462
1295	0	523	1	0	0	14,7	10,77843137
1296	0	524	0	1	3,7	9,3	5,596296296
1297	0	525	0	1	12,1	16,7	4,57878788
1298	0	525	1	1	12,9	14,3	1,44285714
1299	0	525	3	1	8,1	11,3	3,235483871
1300	0	526	0	0	4,1	6,8	2,690410959
1301	0	526	1	0	1,9	2,8	0,930841121
1302	0	527	0	0
1303	0	527	3	0
1304	0	527	4	0
1305	0	527	6	0	9,2	18,3	9,133333333
1306	0	527	8	0
1307	0	527	11	0	0	8,3	6,911111111
1308	0	528	0	1	18,6	30,2	11,59534884
1309	0	528	2	1	42,4	50,7	8,33888889
1310	0	529	0	0	0	12	8
1311	0	529	3	0	5,8	9,6	3,830769231
1312	0	529	6	0	6	11,9	5,929850746
1313	0	529	8	0	5,8	9,7	3,874757282
1314	0	529	13	0	0	5,6	4,905555556
1315	0	530	0	1
1316	0	530	2	1
1317	0	530	8	1	8,2	19,6	11,3721519
1318	0	531	0	0	3,8	7,6	3,802531646
1319	0	532	0	0	7,5	12,2	4,717006803
1320	0	533	0	0	5,5	9,1	3,645454545
1321	0	533	1	0
1322	0	533	4	0	9,4	12,8	3,398290598
1323	0	533	6	0	3	7,1	4,06969697
1324	0	534	0	1	0	6	6
1325	0	534	2	1	0	19,6	17,42608696
1326	0	534	4	1
1327	0	534	5	1
1328	0	534	7	1
1329	0	535	0	1	13,2	24,2	11,01318681
1330	0	536	0	0	10,6	28,8	18,19393939
1331	0	536	2	0	9,2	20	10,76923077
1332	0	537	0	0	7,3	10,9	3,627272727
1333	0	537	2	0
1334	0	537	4	0	9,7	25,2	15,49126214
1335	0	537	7	0	4,9	10,8	5,898039216
1336	0	538	0	0	0	5,6	4,201398601
1337	0	539	0	0	2,2	5,5	3,302197802
1338	0	539	1	0	2	3,9	1,939215686
1339	0	539	3	0
1340	0	539	5	0
1341	0	540	0	0	0	13,2	10,56842105
1342	0	540	2	0	18,6	27,9	9,29534884
1343	0	540	4	0	20,7	37,1	16,41034483
1344	0	540	5	0	15,3	35,9	20,63282443
1345	0	541	0	1	0	6,1	5,230434783
1346	0	541	1	1	0	6,9	5,750574713
1347	0	542	0	0	0	12,7	8,474647887
1348	0	542	4	0
1349	0	543	0	0	3,3	8,7	5,439130435
1350	0	544	0	0	2,2	5,6	3,377777778
1351	0	544	1	0	0	6,4	4,272340426
1352	0	544	3	0	3,4	6,9	3,451724138
1353	0	544	4	0	5,1	9	3,871794872
1354	0	544	6	0	11,1	16,2	5,08888889
1355	0	545	0	0
1356	0	545	2	0
1357	0	546	0	0	0	17,2	13,46865672
1358	0	547	0	1	10,1	13,8	3,70825688
1359	0	547	7	1	0	22,4	18,9034965
1360	0	547	7	1	0	19,9	15,92649007
1361	0	547	8	1	0	22	19,10982659
1362	0	547	9	1	0	18,8	16,11182796
1363	0	547	10	1	0	17,7	15,7861244
1364	0	547	11	1	0	14,1	12,95496183
1365	0	547	12	1	0	11,5	10,30952381
1366	0	547	13	1	0	10,6	9,812598425
1367	0	547	14	1	0	9,2	8,322807018
1368	0	547	15	1	0	12,3	11,31477833
1369	0	547	16	1	0	15,9	13,75407725
1370	0	548	0	1	0	23,5	18,5617284
1371	0	548	2	0	0	27,2	23,69122807
1372	0	549	0	0	0	11,3	11,3
1373	0	549	5	0	0	30	23,33333333
1374	0	549	9	0	0	10,5	7,868421053
1375	0	549	13	0	0	13,8	10,35172414
1376	0	549	15	0	0	17,6	14,65882353
1377	0	549	16	0	0	14,3	11,44285714
1378	0	549	19	0	0	17,2	13,75172414
1379	0	550	0	0	5,8	10,9	5,060583942
1380	0	551	0	0
1381	0	551	2	0
1382	0	551	6	0	0	11,8	8,858823529
1383	0	551	9	0	0	10,3	9,150574713
1384	0	552	0	0	0	4,2	4,2
1385	0	552	5	0	0	5,6	4,476404494
1386	0	552	7	0	1,3	2,6	1,301298701
1387	0	552	8	0	3,4	5,1	1,710169492
1388	0	553	0	0	0	9,9	6,196296296
1389	0	553	2	0	5,3	13,2	7,936842105
1390	0	554	0	1	3,7	9,3	5,596296296
1391	0	554	4	1	0	21	17,77419355
1392	0	554	5	1	0	24,7	20,8038961
1393	0	554	6	1	0	26	23,56097561
1394	0	554	7	1	0	21,1	21,1
1395	0	554	8	1	0	20,1	18,84213837
1396	0	554	9	1	0	22,5	19,82620321
1397	0	554	10	1	0	21,8	19,76954315
1398	0	554	11	1	0	18	16,5
1399	0	555	0	1	0	7,8	5,202597403
1400	0	555	3	1	0	19,4	15,09892473
1401	0	555	4	1	0	23,1	20,32222222
1402	0	555	5	1	0	11,1	11,1
1403	0	555	6	1	0	11,2	9,957763975
1404	0	555	7	1	0	14	12,78048781
1405	0	555	8	1	0	11,3	10,675
1406	0	555	9	1	0	10,5	9,184210526
1407	0	555	10	1	0	15,1	13,51269841
1408	0	555	11	1	0	16,7	14,61666667
1409	0	555	12	1	0	10,8	10,8
1410	0	556	0	1	4,2	8,3	4,133333333
1411	0	556	4	1	5,8	14,5	8,702898551
1412	0	556	5	1	0	15,9	11,55217391
1413	0	556	6	1	0	17,9	17,9
1414	0	556	7	1	0	15,9	13,62727273
1415	0	556	8	1	0	24,5	18,37755102
1416	0	556	9	1	0	23,1	17,33076923
1417	0	556	10	1	0	18,6	14,67843137
1418	0	556	11	1	0	28,8	24,25454546
1419	0	556	12	1	0	26,8	22,57464789
1420	0	556	13	1	0	26,6	21,09541284
1421	0	557	0	1	0	9,1	7,801298701
1422	0	557	2	1
1423	0	558	0	1	7,1	11,3	4,157142857
1424	0	558	0	1
1425	0	558	1	1
1426	0	558	2	1
1427	0	558	3	1	19,2	25,6	6,41395349
1428	0	558	4	1	14,3	25,3	11,01428571
1429	0	558	4	1	12,1	27,4	15,29237668
1430	0	558	5	1	0	28,6	19,80879121
1431	0	558	6	1	0	23,6	17,19605911
1432	0	558	7	1	0	18,9	14,17559055
1433	0	558	8	1
1434	0	559	0	1
1435	0	559	0	1	0	6,1	4,059183673
1436	0	559	2	1	3	7,9	4,92970297
1437	0	559	2	1	6,1	12,2	6,102439024
1438	0	559	3	1
1439	0	559	4	1
1440	0	559	5	1
1441	0	559	6	1
1442	0	559	7	1
1443	0	559	8	1
1444	0	559	9	1
1445	0	560	0	1	8,1	16,2	8,091891892
1446	0	560	1	1	7	19,3	12,28245614
1447	0	560	2	1	14,3	23,8	9,51428571
1448	0	560	3	1	22,7	34,1	11,37272727
1449	0	560	4	1	31,5	38,9	7,41851852
1450	0	560	5	1	13,3	24,1	10,84698795
1451	0	560	6	1	6,6	13,2	6,596226415
1452	0	560	7	1	0	16,3	12,55
1453	0	560	8	1	0	12,2	12,2
1454	0	560	9	1	0	22,9	20,04285714
1455	0	560	10	1	0	17,5	15,55825243
1456	0	561	0	0	6,5	16,1	9,648387097
1457	0	561	1	0
1458	0	561	2	0
1459	0	561	7	0	0	9,4	6,444334975
1460	0	562	0	0	0	10	8,333333333
1461	0	562	3	0	0	6,8	4,527272727
1462	0	563	0	0	0	10,7	8,319047619
1463	0	563	1	0	0	12,1	10,48709677
1464	0	563	2	0	0	9	8,180327869
1465	0	564	0	0	0	5,5	5,5
1466	0	564	5	0	2,6	7,7	5,135897436
1467	0	564	7	0	0	7,3	5,481818182
1468	0	565	0	0
1469	0	565	2	0
1470	0	565	4	0	25,7	32,6	6,9315508
1471	0	565	7	0	4,8	13,1	8,272413793
1472	0	566	0	1	0	7	5,245614035
1473	0	566	2	1
1474	0	566	4	1	6,5	14	7,457943925
1475	0	566	5	1
1476	0	566	5	1	10,3	16,5	6,19072165
1477	0	566	5	1	6,1	13,1	7,039393939
1478	0	566	6	1
1479	0	566	7	1	0	16,1	11,26129032
1480	0	566	10	1
1481	0	566	11	1	0	23,6	16,32727273
1482	0	567	0	1	5,4	13,5	8,094594595
1483	0	567	4	1	0	18,5	12,34615385
1484	0	567	5	1	0	18,8	13,00289855
1485	0	567	6	1	0	21,5	16,43670886
1486	0	567	7	1	6,6	21,3	14,74262295
1487	0	567	8	1	0	23,4	15,60779221
1488	0	567	9	1	8,6	24,3	15,72857143
1489	0	567	10	1	11,7	23,4	11,69787234
1490	0	567	11	1	10,8	22,5	11,68918919
1491	0	567	12	1	6,5	15,8	9,325179856
1492	0	567	13	1	6	15,8	9,784962406
1493	0	568	0	0
1494	0	568	1	0
1495	0	569	0	0	0	8	6,540145985
1496	0	569	1	0	0	6,3	4,514285714
1497	0	569	1	0	0	4,3	4,3
1498	0	570	0	0	2,5	7	4,452229299
1499	0	570	1	0	2,4	6,5	4,080645161
1500	0	570	3	0	4,9	13,8	8,92195122
1501	0	571	0	0	4,8	11,9	7,138095238
1502	0	571	1	0	0	10,2	7,657627119
1503	0	571	2	0	3	9	6
1504	0	571	3	0	0	8,9	5,92970297
1505	0	572	0	1	10,7	17,9	7,18571429
1506	0	572	1	1
1507	0	573	4	1
1508	0	574	2	0	0	8,8	8,8
1509	0	574	4	0	0	4,8	4,8
1510	0	574	6	0
1511	0	574	11	0	0	29,4	29,4
1512	0	574	13	0
1513	0	574	15	0	0	25	25
1514	0	574	17	0	0	29,2	25,03333333
1515	0	575	4	0	10,6	19,7	9,09393939
1516	0	576	13	0	0	7,4	6,939170507
1517	0	577	5	1	17,9	26,4	8,4754717
1518	0	577	7	1	7,8	15,6	7,807792208
1519	0	577	10	1	0	10,3	7,26969697
1520	0	578	4	0
1521	0	579	5	0	0	15,3	12,94705882
1522	0	579	9	0
1523	0	579	11	0	11,7	15,5	3,84951456
1524	0	579	13	0
1525	0	579	16	0	0	15,4	11,2041958
1526	0	580	0	1	0	4,3	4,3
1527	0	580	5	1	0	13,9	12,63417722
1528	0	581	2	1	0	6,6	5,284210526
1529	0	581	4	1	0	7,4	5,929411765
1530	0	581	7	1
1531	0	581	9	1	0	19,5	17,06097561
1532	0	581	11	1	0	33,3	26,63333333
1533	0	581	14	1	0	18,8	16,71666667
1534	0	582	1	1	0	3,5	3,5
1535	0	582	3	1	0	0	0
1536	0	582	4	1	0	5,2	3,901298701
1537	0	582	6	1	2,1	6,3	4,216666667
1538	0	582	8	1	11,8	21,6	9,83529412
1539	0	583	1	1
1540	0	583	2	1
1541	0	583	3	1
1542	0	583	5	1	10	13,3	3,3
1543	0	583	8	1	0	19	13,82758621
1544	0	583	10	1	0	14,3	11,12539683
1545	0	583	10	1	0	17,1	13,29047619
1546	0	583	12	1	0	21,9	19,16027397
1547	0	583	15	1	0	25,9	19,00344828
1548	0	584	1	0	2,7	6,8	4,097297297
1549	0	584	6	0	5,1	13,1	8,049494949
1550	0	584	9	0	0	18,6	12,88571429
1551	0	584	13	0	0	13,2	11,44561404
1552	0	585	1	0	0	6	3,619047619
1553	0	585	3	0	2,3	4,7	2,374418605
1554	0	585	5	0	3,3	8,2	4,921311475
1555	0	586	0	0	0	4,1	3,581865285
1556	0	586	2	0	0	3,9	2,609677419
1557	0	587	0	1	3,7	9,3	5,596296296
1558	0	587	2	1	0	17,2	13,75172414
1559	0	587	4	1	0	12,1	9,06969697
1560	0	587	5	1	0	18,2	15,16969697
1561	0	587	7	1	0	15,9	11,35454546
1562	0	587	9	1	3,8	11,5	7,653846154
1563	0	587	12	1	0	25	21,42857143
1564	0	588	1	0	11,8	14,7	2,93529412
1565	0	588	3	0	6,6	13,2	6,596226415
1566	0	589	1	0	5,3	9,3	3,966666667
1567	0	589	3	0	6,6	13,2	6,621052632
1568	0	590	1	0	0	4,5	4,5
1569	0	590	2	0	0	6,5	5,413043478
1570	0	590	5	0	0	11,5	9,576923077
1571	0	590	7	0	0	15,7	13,29036145
1572	0	591	0	0
1573	0	591	1	0	1,9	5,7	3,813207547
1574	0	591	2	0	7,1	11,9	4,757142857
1575	0	591	4	0	9,9	16,8	6,876335878
1576	0	592	0	0	0	11,8	9,839215686
1577	0	592	5	0	7,9	13,2	5,305263158
1578	0	592	7	0	2,9	5,7	2,842857143
1579	0	592	9	0	8,7	19,6	10,90434783
1580	0	592	11	0	0	12	10
1581	0	593	0	0	0	2,5	2,5
1582	0	593	3	0	0	5,8	5,8
1583	0	594	1	1
1584	0	594	2	1
1585	0	594	5	1
1586	0	594	5	1	7,5	11,3	3,8
1587	0	594	7	1
1588	0	594	9	1
1589	0	594	12	1
1590	0	595	0	0	1,7	3,4	1,690598291
1591	0	595	2	0	0	4,9	2,958252427
1592	0	596	0	0	0	11,1	11,1
1593	0	596	8	0	0	6,9	6,9
1594	0	596	9	0	0	18,9	16,1972973
1595	0	597	0	1
1596	0	597	2	1	9	15,4	6,425641026
1597	0	598	0	0	4,9	7,3	2,42195122
1598	0	598	2	0	2,5	7,6	5,06835443
1599	0	599	0	0
1600	0	599	1	0	12,1	17,2	5,13103448
1601	0	599	2	0
1602	0	599	4	0	9,5	14,9	5,440540541
1603	0	599	6	0	4,9	11,7	6,845631068
1604	0	599	8	0	0	11,9	8,196296296
1605	0	599	9	0	0	12,3	9,223076923
1606	0	599	11	0	0	10,8	8,772972973
1607	0	600	0	0	4,9	14,6	9,72195122
1608	0	600	1	0	5,9	14,7	8,817647059
1609	0	600	3	0	0	13,4	10,41492537
1610	0	601	0	0
1611	0	601	2	0
1612	0	601	4	0
1613	0	602	1	0	0	16,9	11,26619718
1614	0	602	3	0	14,3	30,4	16,11428571
1615	0	602	4	0	0	17	13,22641509
1616	0	602	6	0	0	16,9	15,6012987
1617	0	602	8	0	0	23,5	22,2654321
1618	0	602	10	0	0	22,1	20,3300885
1619	0	603	2	1
1620	0	603	4	1
1621	0	603	6	1
1622	0	603	7	1	10	15	5
1623	0	603	8	1
1624	0	603	9	1	0	19	14
1625	0	603	10	1	5,6	15,6	10,04444444
1626	0	603	11	1	0	12,4	8,860176991
1627	0	604	0	1
1628	0	604	3	1
1629	0	604	5	1	0	10,3	8,23814433
1630	0	604	7	1	0	11,6	9,274418605
1631	0	605	1	1
1632	0	605	4	1	1,2	3,5	2,337209302
1633	0	605	7	1
1634	0	605	9	1	6,3	10	3,75
1635	0	606	1	0	4,1	6,1	2,018367347
1636	0	606	2	0	0	11,4	8,542857143
1637	0	607	0	0
1638	0	607	1	0	1,8	7	5,245614035
1639	0	607	2	0
1640	0	607	4	0	4,1	8,2	8,2
1641	0	607	6	0
1642	0	607	8	0	0	19	13,44444444
1643	0	608	0	1	0	4,8	4,8
1644	0	608	2	1	0	2,4	2,4
1645	0	608	4	1	0	7,4	3,696296296
1646	0	609	0	1	13,6	25,9	12,31975309
1647	0	609	1	1	10,3	22,2	11,94358974
1648	0	609	3	1	0	19,2	14,07179487
1649	0	609	5	1	0	17,4	13,05217391
1650	0	609	5	1	0	17,5	12,73809524
1651	0	610	0	1
1652	0	610	2	1
1653	0	610	4	1	9,1	15,9	6,809090909
1654	0	610	5	1	12,3	21,5	9,19230769
1655	0	610	7	1	12,9	25,8	12,89677419
1656	0	610	10	1	0	15,5	11,92857143
1657	0	611	0	0	0	5,1	3,059183673
1658	0	611	2	0	3,6	5,5	1,863636364
1659	0	612	0	0	4,4	7,7	3,304395604
1660	0	612	2	0	5,2	6,9	1,727586207
1661	0	612	4	0	0	13,6	10,21016949
1662	0	613	0	1	7,1	14,3	7,157142857
1663	0	613	1	1	10	10	0
1664	0	613	6	1	8,3	8,3	-0,033333333
1665	0	613	9	1	4,5	18,2	13,65454546
1666	0	614	0	0	6,7	18,7	11,98358209
1667	0	614	8	0	0	29,8	23,8397351
1668	0	614	10	0	0	22,2	16,64444444
1669	0	614	12	0	0	21,8	15,3483871
1670	0	614	14	0	11,3	27,5	16,25
1671	0	614	16	0	0	24,6	17,82033898
1672	0	614	18	0	9,1	24,7	15,60909091
1673	0	615	1	0
1674	0	615	2	0
1675	0	615	4	0
1676	0	616	1	1
1677	0	616	3	1
1678	0	616	4	1
1679	0	616	6	1
1680	0	617	0	1	0	15,9	11,02195122
1681	0	617	1	1	0	15,1	12,94172662
1682	0	617	3	1	7,8	15,6	7,7875
1683	0	617	5	1	5,9	16,5	10,61764706
1684	0	618	2	0	11,1	20	8,88888889
1685	0	618	4	0	7,5	17	9,452830189
1686	0	618	6	0	0	18,2	13,65454546
1687	0	618	8	0	0	14,6	12,65825243
1688	0	619	2	0	6,6	11,5	4,942622951
1689	0	619	4	0	3,2	7,9	4,725396825
1690	0	620	3	1	7,7	15,4	7,707692308
1691	0	620	3	1	3,4	10,3	6,851724138
1692	0	620	5	1	0	14,3	10,72857143
1693	0	620	8	1	0	17,9	14,32857143
1694	0	621	2	1
1695	0	622	0	0	9,4	16,5	7,088235294
1696	0	622	5	0	0	13	8,652173913
1697	0	623	0	0	1,9	3,7	1,848148148
1698	0	623	2	0
1699	0	623	4	0
1700	0	623	6	0	0	8,2	6,560655738
1701	0	624	0	1	0	4,8	4,8
1702	0	624	1	1	0	6,1	4,059183673
1703	0	624	3	1	0	2,4	2,4
1704	0	625	0	1
1705	0	625	2	1
1706	0	625	3	1
1707	0	625	4	1
1708	0	625	7	1
1710	0	627	0	0
1711	0	627	1	0
1712	0	627	3	0
1713	0	627	5	0	0	22,7	18,15454546
1714	0	628	0	0
1715	0	628	1	0	4,5	9,1	4,554545455
1716	0	628	3	0
1717	0	629	0	0	4,9	9,8	4,881967213
1718	0	629	1	0
1719	0	629	5	0	12,7	25,3	12,64177215
1720	0	630	0	0	5	14	9
1721	0	630	1	0	4,2	11,1	6,933333333
1722	0	630	3	0	6,2	13,6	7,427160494
1723	0	631	0	0	0	15,3	10,53809524
1724	0	631	2	0
1725	0	631	4	0
1726	0	631	6	0
1727	0	632	0	0	3	7,5	4,514925373
1728	0	632	2	0	2,7	8,2	5,460273973
1729	0	632	4	0	8,8	14	5,228070175
1730	0	632	6	0	6,8	11,9	5,120338983
1731	0	633	0	0	0	11	9,630136986
1732	0	633	3	0	2,3	8	5,727272727
1733	0	633	5	0	0	8,8	7,701098901
1734	0	633	7	0	0	8	6,214285714
1735	0	634	0	1	3,1	7,7	4,623076923
1736	0	634	2	1	6,3	8,9	2,570886076
1737	0	634	5	1	11,8	13,2	1,43529412
1738	0	634	8	1	22,9	31,4	8,54285714
1739	0	635	0	0	0	9	5,992481203
1740	0	635	5	0
1741	0	635	6	0
1742	0	636	0	0
1743	0	636	1	0	0	2,4	2,4
1744	0	636	3	0	0	7,3	4,86097561
1745	0	636	5	0	6,6	13,1	6,542622951
1746	0	637	0	0	0	4,6	3,977593361
1747	0	637	2	0
1748	0	637	4	0
1749	0	638	0	0	0	12	11,07407407
1750	0	638	2	0	0	12	10,14814815
1751	0	639	0	0	0	1,6	0,824806202
1752	0	639	1	0	0	5,8	3,858252427
1753	0	639	3	0	3,2	4,8	1,625396825
1754	0	640	0	1	0	5,9	4,90990099
1755	0	640	2	1
1756	0	640	6	1	9,7	19,4	9,677777778
1757	0	640	8	1	8,4	16,8	8,420111732
1758	0	641	0	1	8,2	15,5	7,25257732
1759	0	641	1	1	4,3	12	7,652173913
1760	0	642	0	0	0	4	4
1761	0	642	5	0	0	9,3	7,975496689
1762	0	642	7	0	0	9,8	8,17398374
1763	0	643	0	0	3,9	11,8	7,878431373
1764	0	643	1	0	0	9,8	5,878431373
1765	0	643	3	0	6,3	14,6	8,35
1766	0	643	5	0	6,3	14,1	7,85
1767	0	643	7	0	0	14,8	11,52131148
1768	0	644	0	0	0	10,1	10,1
1769	0	644	1	0	0	8,7	8,303174603
1770	0	645	0	0	0	12,7	12,7
1771	0	645	9	0
1772	0	645	13	0
1773	0	646	0	1	0	8,9	7,788888889
1774	0	646	2	1	0	13,3	8,855555556
1775	0	646	6	1	15,7	26,5	10,81372549
1776	0	647	0	1	2,5	4,2	1,7
1777	0	647	2	1
1778	0	648	0	0	0	8,8	6,602197802
1779	0	649	0	0	4,8	9,6	4,780722892
1780	0	649	1	0	5,6	9,3	3,744444444
1781	0	649	3	0	7,5	17,5	10
1782	0	649	6	0	7,5	17,5	10
1783	0	650	2	1
1784	0	651	10	0	0	10,2	8,62519685
1785	0	651	13	0	3,9	9,7	5,816504854
1786	0	651	16	0	6,8	15,9	9,081818182
1787	0	652	0	0	0	6,1	4,584848485
1788	0	652	2	0	0	6,7	5,033333333
1789	0	652	3	0	5,1	12,8	7,671794872
1790	0	652	5	0
1791	0	653	0	1	4,3	10,9	6,552173913
1792	0	653	2	1	7,6	12,1	4,524242424
1793	0	653	5	1	18,2	22,7	4,51818182
1794	0	654	0	0	5,8	9,6	3,830769231
1795	0	654	2	0	4,1	9,5	5,445945946
1796	0	655	0	0	0	5,2	3,901298701
1797	0	655	2	0	0	4,8	4,8
1798	0	656	0	0	4,2	6	1,78313253
1799	0	656	2	0
1800	0	656	3	0	6,3	8,1	1,85
1801	0	657	0	0	6,8	6,8	-0,018181818
1802	0	657	2	0	5,6	11,1	5,544444444
1803	0	658	0	0
1804	0	658	1	0	4	6,1	2,05959596
1805	0	658	3	0	12,2	15,9	3,70487805
1806	0	658	5	0	8,8	13,2	4,408791209
1807	0	659	0	1	2,1	4,9	2,787323944
1808	0	659	4	1
1809	0	660	0	0	8	10,2	2,245454545
1810	0	660	2	0	6,1	8,7	2,613043478
1811	0	661	0	0	4	9,3	5,3
1812	0	661	2	0	6	11,9	5,929850746
1813	0	662	0	0
1814	0	662	1	0
1815	0	662	3	0	6,8	15,3	8,520338983
1816	0	663	0	1	8	10,3	2,3
1817	0	663	2	1	15	16,5	1,53937008
1818	0	663	4	1	13,3	15,2	1,86666667
1819	0	664	0	0	3,2	8,5	5,308510638
1820	0	664	2	0
1821	0	665	0	0	1,5	4,5	2,984848485
1822	0	665	1	0	5,6	7,4	1,844444444
1823	0	665	2	0	2,7	4,1	1,360273973
1824	0	665	4	0	9,1	12,1	3,009090909
1825	0	665	5	0	5,9	13,2	7,317647059
1826	0	666	0	1	0	8,8	5,858823529
1827	0	666	2	1	0	9,4	6,275
1828	0	666	4	1
1829	0	666	6	1	0	15,2	12,16969697
1830	0	667	0	0	11,1	19,4	8,28888889
1831	0	668	5	1	0	17,8	13,69041096
1832	0	669	4	0	10,9	21,7	10,83043478
1833	0	670	0	0	0	8	6
1834	0	670	3	0	0	11,4	7,602531646
1835	0	671	0	0
1836	0	672	0	1	13,3	16	2,66666667
1837	0	672	1	1
1838	0	672	3	1	11,1	13,3	2,18888889
1839	0	673	0	0	0	8	6,230088496
1840	0	673	3	0	3,3	8,2	4,921311475
1841	0	674	0	1
1842	0	674	3	1	14,6	22	7,36585366
1843	0	675	0	0	9,6	11,5	1,884615385
1844	0	676	0	1
1845	0	676	1	1
1846	0	676	3	1
1847	0	677	0	1	3,8	6,3	2,55
1848	0	677	2	1	4,8	7,9	3,138095238
1849	0	677	4	1	6,5	10,9	4,37826087
1850	0	678	0	1	0	7,1	5,314285714
1851	0	678	1	1
1852	0	678	3	1	0	11	9
1853	0	679	0	0
1854	0	679	2	0
1855	0	680	0	0	5,1	12,8	7,671794872
1856	0	680	2	0	4,6	13,8	9,184615385
1857	0	681	0	0	3,6	7,2	3,585542169
1858	0	681	2	0	5,5	10,9	5,43125
1859	0	682	0	0	0	13,5	10,61538462
1860	0	682	1	0	0	9,7	8,311111111
1861	0	682	3	0	0	14,7	13,1496124
1862	0	683	0	0	0	13,1	10,06969697
1863	0	683	5	0
1864	0	683	6	0	5,7	12,6	6,852873563
1865	0	683	7	0	5,9	15,3	9,359405941
1866	0	684	0	0	0	11,9	11,9
1867	0	684	3	0	0	13,3	9,966666667
1868	0	685	0	1	7,8	13	5,207792208
1869	0	685	1	1	10,4	16,4	5,95223881
1870	0	685	3	1	13,2	19,1	5,86470588
1871	0	686	0	1	3,5	9,2	5,653900709
1872	0	686	1	1	0	9,3	6,757627119
1873	0	686	2	1	0	12	9,590361446
1874	0	686	4	1	0	9,6	6,860273973
1875	0	687	0	1	6,1	14,8	8,713043478
1876	0	687	3	1	0	14,3	11,62142857
1877	0	688	0	0	9,2	18,5	9,269230769
1878	0	688	1	0	5,6	14,1	8,466197183
1879	0	689	1	0	0	17	12,74468085
1880	0	689	3	0	0	12	10
1881	0	690	0	1	4,1	9,5	5,445945946
1882	0	690	2	1
1883	0	691	1	0	0	10,5	9,192810458
1884	0	691	2	0	0	11,9	8,92970297
1885	0	692	0	0	4,9	8,5	3,570422535
1886	0	692	2	0	6,3	10,1	3,770886076
1887	0	693	0	1
1888	0	693	3	1	10	15	5
1889	0	694	0	0	3,7	6,5	2,761682243
1890	0	694	1	0	5,1	9,1	3,986363636
1891	0	694	3	0
1892	0	695	3	1
1893	0	695	4	1
1894	0	695	5	1
1895	0	695	6	1
1896	0	695	7	1	5,6	12,7	7,144444444
1897	0	696	3	1	0	3,3	3,3
1898	0	696	3	1	0	11,8	9,072727273
1899	0	696	3	1	4,4	8,9	4,455555556
1900	0	696	3	1	0	11,7	9,758252427
1901	0	696	20	1	0	7,4	6,782716049
1902	0	696	21	1	0	8,2	7,023529412
1903	0	696	22	1	0	8,7	7,679591837
1904	0	696	23	1	0	6	5,397590361
1905	0	696	24	1	0	6,2	5,582716049
1906	0	697	2	0
1907	0	697	3	0
1908	0	698	20	1	0	9,5	9,5
1909	0	698	21	1	0	5,6	4,806349206
1910	0	698	22	1	0	4	4
1911	0	698	23	1	0	4,6	3,674074074
1912	0	698	24	1	0	10,7	8,220661157
1913	0	698	25	1	0	10,3	8,23814433
1914	0	698	26	1	0	13,3	10,64513274
1916	0	700	0	0	0	4,2	4,2
1928	0	703	2	1	0	13,1	11,46065574
1929	0	703	3	1	7,6	19,5	11,87288136
1930	0	703	4	1	9,8	21,3	11,46393443
1931	0	703	5	1	6,2	15,5	9,31443299
1932	0	703	6	1	6,4	17,3	10,93636364
1933	0	703	7	1	0	18,3	13,0826087
1934	0	703	8	1	0	18,1	13,75217391
1935	0	704	2	1
1936	0	704	3	1
1937	0	704	4	1
1938	0	704	5	1	0	14,6	10,43333333
1939	0	704	6	1
1940	0	704	7	1	7,4	17,3	9,892592593
1941	0	704	8	1	0	16,5	13,58737864
1942	0	705	1	1	0	13,4	11,28732394
1943	0	705	3	1	0	16,1	14,08657718
1944	0	705	4	1	0	13,6	12,3012987
1945	0	705	5	1	0	16,4	14,76065574
1946	0	705	6	1	0	15,6	14,40239521
1947	0	706	5	0
1948	0	707	3	0	0	1,4	1,4
1949	0	707	5	0
1950	0	708	0	0	2,9	5,9	2,958823529
1951	0	709	0	1	7,8	9,8	1,956862745
1952	0	709	1	1	5	13,3	8,3
1953	0	709	2	1	4,9	9,9	4,961728395
1954	0	709	3	1	7,9	12,7	4,763492063
1955	0	709	4	1	6,6	14,5	7,921052632
1956	0	710	1	1	1,8	5,4	3,614285714
1957	0	710	1	1	6	13,3	7,275903614
1958	0	710	2	1
1959	0	710	4	1	8,2	16,3	8,136734694
1960	0	711	3	1	0	31,9	23,3893617
1961	0	711	3	1	0	26,7	20,03333333
1962	0	711	4	1	0	31,7	23,76349206
1963	0	712	0	1	8	11	3
1964	0	712	1	1	4,7	7,9	3,175590551
1965	0	712	2	1	5,2	11,3	6,082608696
1966	0	712	3	1	3,8	10,3	6,453846154
1967	0	712	4	1
1968	0	713	0	0	0	3,3	2,756521739
1969	0	714	3	0	0	6,7	4,452808989
1970	0	715	1	0	2,8	7,4	4,559090909
1971	0	716	3	0	0	3,5	3,5
1972	0	717	0	1	4,1	9,3	5,17628866
1973	0	717	0	1	5,1	13,6	8,515254237
1974	0	717	1	1	4,8	12,9	8,061290323
1975	0	717	2	1	7	16,3	9,323255814
1976	0	718	0	1	8,6	11,4	2,828571429
1977	0	718	1	1
1978	0	718	2	1	5	9,2	4,157983193
1979	0	719	0	0	0	5,3	4,247368421
1980	0	720	0	0	0	1,7	1,7
1981	0	721	0	1	5,6	13,6	8,044444444
1982	0	721	1	1	0	11,5	8,358638743
1983	0	722	0	0	6,6	8,8	2,206593407
1984	0	723	0	1	4,2	10,4	6,233333333
1985	0	723	1	1	0	11,9	8,914925373
1986	0	724	1	1	6,7	10	3,333333333
1987	0	724	1	1	6,5	11,3	4,848387097
1988	0	725	0	1	3,6	7,9	4,328571429
1989	0	726	0	1	5,6	8	2,4
1991	0	728	0	0	1,2	2,4	1,180487805
1992	0	729	0	1	7,3	9,6	2,320306513
1993	0	729	0	1	6,4	9,7	3,344067797
1994	0	730	0	1	15,6	21,9	6,275
1995	0	730	1	1	7,8	13	5,207792208
1996	0	730	2	1	10,4	16,7	6,28333333
1997	0	730	3	1	6,3	15,2	8,870886076
1998	0	730	4	1	0	20	13,84615385
1999	0	731	1	0	0	3,7	2,765420561
2000	0	732	0	0	4,1	9,5	5,445945946
2001	0	733	0	1
2002	0	734	0	0	0	2,2	2,2
2003	0	735	4	1	0	25,5	21,24468085
2004	0	735	4	1	0	27,3	22,75454546
2005	0	735	5	1	0	31,1	26,22195122
2006	0	735	6	1	0	31	28,61904762
2007	0	735	7	1	0	31,6	29,06835443
2008	0	735	8	1	0	36,1	34,46065574
2009	0	735	9	1	0	33	30,8021978
2010	0	736	0	0	0	6,3	4,202097902
2011	0	737	0	1	9,5	17,9	8,376190476
2012	0	737	1	1	7,9	17,5	9,605263158
2013	0	737	2	1	0	13,9	8,94950495
2014	0	738	0	0	3,2	7,4	4,242105263
2015	0	739	2	1
2016	0	739	4	1
2017	0	740	1	0	6,3	13,4	7,15
2018	0	740	2	0	4,6	9,2	4,612844037
[truncated: 589 more rows]
