# Supplementary material for: A novel haemocytometric COVID-19 prognostic score developed and validated in an observational multicentre European hospital-based study
Source: eLife journal article supplement (doi:10.7554/elife.63195), 2020-11-26
Supplement: supp [file elife-63195-supp-v1.zip › elife_poa_e63195_Figure_4_source_data_1.csv]

Figure 4 – source data file 1. Source data for trends of absolute neutrophil count over 14 days of hospitalisation in critical/fatal (CF) and non-critical (NC) patients
Filename	exclusion	Pat_ID	length_of_hospitalisation	Critical_or_Fatal	NEUT#(10^3/uL)
1	0	1	0	1	2,77
2	0	1	2	1	3,09
3	0	1	2	1	3,99
4	0	1	3	1	4,74
5	0	1	4	1	2,72
6	0	1	15	1	6,11
7	0	2	0	0	6,22
8	0	2	1	0	3,82
9	0	2	2	0	4,13
10	0	2	3	0	3,98
11	0	2	4	0	3,34
12	0	2	6	0	3,9
13	0	3	0	1	4,03
14	0	3	1	1	2,81
15	0	3	1	1	2,86
16	0	3	2	1	5,84
17	0	3	3	1	5,26
18	0	3	4	1	3,32
19	0	3	4	1	3,08
20	0	3	5	1	3,71
21	0	3	6	1	3,82
22	0	3	7	1	2,82
23	0	3	8	1	2,36
24	0	3	9	1	3,13
25	0	3	10	1	3,76
26	0	3	11	1	2,9
27	0	3	12	1	3,12
28	0	3	13	1	3,6
29	0	4	0	1	5,94
30	0	4	1	1	10,99
31	0	4	1	1	12,98
32	0	4	2	1	5,87
33	0	4	3	1	8,21
34	0	4	4	1	10,43
35	0	4	5	1	13,25
36	0	4	6	1	6,13
37	0	4	7	1	13,37
38	0	4	8	1	8,39
39	0	4	9	1	11,59
40	0	4	10	1	12,58
41	0	4	10	1	11,33
42	0	4	11	1	16,65
43	0	4	12	1	11,74
44	0	4	13	1	12,23
45	0	4	14	1	12,36
46	0	5	0	0	8,1
47	0	5	1	0	7,94
48	0	6	0	0	3,54
49	0	6	2	0	3,23
50	0	6	3	0	2,95
51	0	6	5	0	3,5
52	0	7	0	0	4,16
53	0	7	2	0	2,1
54	0	7	3	0	1,49
55	0	7	4	0	1,3
56	0	7	5	0	1,19
57	0	7	6	0	1,64
58	0	8	1	0	1,35
59	0	9	0	0	5,27
60	0	9	2	0
61	0	9	3	0	3,55
62	0	9	4	0	3,29
63	0	9	5	0	3,38
64	0	9	7	0	3,13
65	0	10	0	1	3,1
66	0	10	1	1	2,88
67	0	10	3	1	4,33
68	0	10	4	1	6,17
69	0	11	0	0	5,22
70	0	11	1	0	2,29
71	0	11	3	0	1,81
72	0	12	0	1	4,74
73	0	12	2	1	6,64
74	0	13	5	1	6,18
75	0	13	6	1	9,63
76	0	13	7	1	10,69
77	0	13	8	1	17,59
78	0	13	9	1	16,1
79	0	13	9	1	13,83
80	0	13	10	1	11,89
81	0	13	11	1	12,88
82	0	13	12	1	13,25
83	0	13	13	1	11,91
84	0	14	1	0	3,24
85	0	15	13	1	8,9
86	0	15	14	1	11,26
87	0	15	15	1	9,68
88	0	15	16	1	10,78
89	0	15	17	1	9,77
90	0	15	18	1	9,51
91	0	15	19	1	8,72
92	0	15	20	1	9,14
93	0	16	11	1	3,97
94	0	16	12	1	4,31
95	0	16	13	1	6,02
96	0	16	14	1	5,53
97	0	16	15	1	4,8
98	0	16	16	1	5,82
99	0	16	17	1	12,58
100	0	16	18	1	10,2
101	0	16	19	1	10,1
102	0	17	1	0
103	0	17	2	0	2,26
104	0	17	4	0	2,33
105	0	18	0	1	12,21
106	0	18	2	1	9,59
107	0	18	2	1	8,56
108	0	18	3	1	8,59
109	0	18	4	1	8,74
110	0	19	0	1	5,06
111	0	19	1	1	7,95
112	0	19	3	1	10,41
113	0	20	0	0	4,25
114	0	20	1	0	4,12
115	0	20	3	0	4,88
116	0	21	0	1	9,49
117	0	22	0	0	3,9
118	0	23	0	0	5,5
119	0	24	0	0	2,53
120	0	25	0	1	3,72
121	0	26	0	0	8,32
122	0	27	0	0	21,95
123	0	28	0	0	5,14
124	0	29	0	0	3,4
125	0	30	0	1
126	0	30	4	1	6,97
127	0	31	0	0	5
128	0	32	0	1	2,85
129	0	33	0	1	2,45
130	0	34	0	1
131	0	35	0	0	2,72
132	0	36	0	1	8,98
133	0	37	0	0	5,8
134	0	38	0	1	4,36
135	0	39	0	0	5,66
136	0	40	0	0	5,41
137	0	41	0	0	1,72
138	0	42	0	0	4,1
139	0	43	0	0	5,52
140	0	44	0	0	4,65
141	0	45	0	1	19
142	0	45	1	1
143	0	45	1	1
144	0	45	2	1	18,69
145	0	45	3	1
146	0	45	4	1	28,42
147	0	45	5	1	22,64
148	0	45	5	1
149	0	45	6	1	16,81
150	0	45	6	1
151	0	45	7	1	14,46
152	0	45	7	1
153	0	45	8	1	16,71
154	0	45	9	1	19,89
155	0	45	10	1	19,24
156	0	45	11	1	18,21
157	0	45	12	1	14,84
158	0	45	13	1	10,79
159	0	45	14	1	13,53
160	0	45	15	1	12,82
161	0	45	16	1	9,91
162	0	45	17	1	8,2
163	0	45	18	1	7,8
164	0	45	19	1	9,07
165	0	45	20	1	8,51
166	0	45	21	1	6,47
167	0	45	22	1	5,43
168	0	46	0	0	4,08
169	0	47	0	0	9,27
170	0	48	0	1	2,46
171	0	49	0	1
172	0	50	0	0	3,27
173	0	51	0	0	5,04
174	0	52	0	1	5,56
175	0	53	0	1	6,78
176	0	54	0	1	5,97
177	0	54	4	1	6,05
178	0	54	10	1	9,44
179	0	54	11	1	15,55
180	0	55	0	0	2,57
181	0	56	0	1	6,14
182	0	57	0	0	6,52
183	0	58	0	0	3,54
184	0	59	0	0	2,67
185	0	60	0	0	6,07
186	0	61	0	0	5,55
187	0	62	0	1	5,02
188	0	63	0	0	5,15
189	0	64	0	0	2,28
190	0	65	0	0
191	0	66	0	1	11,03
192	0	67	0	0
193	0	68	0	0	5,17
194	0	69	0	0	2,27
195	0	70	0	0	0,5
196	0	71	0	0	3,08
197	0	72	0	0	6,24
198	0	73	0	0	5,81
199	0	74	0	0	2,01
200	0	75	0	0	4,1
201	0	76	0	0
202	0	77	0	0	3,1
203	0	78	0	1	4,7
204	0	79	0	0	4,02
205	0	79	0	0
206	0	79	1	0
207	0	79	2	0
208	0	79	3	0	2,71
209	0	79	5	0	2,89
210	0	79	7	0
211	0	79	8	0	2,78
212	0	79	9	0
213	0	79	10	0	5,05
214	0	79	12	0	6,87
215	0	80	0	0	4,25
216	0	81	0	1	2,7
217	0	82	0	0	7,09
218	0	83	0	0	4,51
220	0	85	0	1	3,27
221	0	86	0	1	5
222	0	87	0	0	2,62
223	0	88	0	0	3,54
225	0	90	0	0	9,54
226	0	91	0	0	3,73
227	0	92	0	0	3,2
228	0	93	0	1	8,57
229	0	93	1	1
230	0	93	2	1	8,29
231	0	94	0	0	4,17
232	0	95	0	0	5,32
233	0	96	0	1	4,21
234	0	97	0	0	7,63
235	0	98	0	0	3,88
236	0	98	2	0	4,66
237	0	98	4	0
238	0	98	5	0
239	0	98	13	0	3,16
240	0	99	0	1	8,24
241	0	99	1	1	7,55
242	0	99	2	1
243	0	99	3	1
244	0	99	4	1
245	0	99	5	1
246	0	100	0	1	4,14
247	0	101	0	1	3,67
248	0	102	0	0	7,17
249	0	103	0	1	2,84
250	0	103	1	1	4,33
251	0	104	0	1	5,32
252	0	105	0	0	9,03
253	0	106	0	1	3,38
254	0	107	0	0	6
255	0	108	0	0	3,75
256	0	109	0	1	3,32
257	0	110	0	0	4,03
258	0	110	1	0
259	0	110	2	0
260	0	110	3	0
261	0	110	4	0
262	0	110	5	0
263	0	110	6	0
264	0	110	7	0
265	0	110	7	0
266	0	110	8	0	3,73
267	0	110	9	0	3,02
268	0	110	10	0	3,18
269	0	110	11	0	1,55
270	0	110	12	0	2,42
271	0	110	13	0	2,14
272	0	110	16	0	1,4
273	0	110	17	0	1,19
274	0	110	20	0	1,27
275	0	111	0	0	4,59
276	0	112	0	0	6,58
277	0	113	0	0	4,64
278	0	114	0	1	1,25
279	0	115	0	1	7,89
280	0	116	0	1	10,62
281	0	117	0	0	6,1
282	0	118	0	1	9,45
283	0	119	0	1	11,88
284	0	120	0	1	5,01
285	0	121	0	1	6,46
286	0	122	0	0	7,72
287	0	122	4	0
288	0	122	7	0
289	0	122	9	0
290	0	123	0	1	11,69
291	0	124	0	0	5,09
292	0	125	0	0	4,72
293	0	126	0	1	4,78
294	0	126	2	1	9,22
295	0	127	0	0	4,33
296	0	127	4	0	3,97
297	0	128	0	1	3,15
298	0	129	0	0	1,94
299	0	130	0	1	5,35
300	0	131	0	1	2,19
301	0	132	0	1	6,27
302	0	133	0	1	4,29
303	0	134	0	1	5,25
304	0	134	2	1	4,95
305	0	134	3	1	5,3
306	0	135	0	0	4,3
307	0	136	0	0	4,45
308	0	136	5	0	7,62
309	0	136	7	0	2,6
310	0	136	8	0
311	0	136	9	0	2,9
312	0	136	10	0	3,25
313	0	136	11	0	3,65
314	0	136	12	0	3,29
315	0	136	13	0	3,32
316	0	136	14	0	3,53
317	0	137	0	1	8,09
318	0	137	1	1	7,72
319	0	137	2	1
320	0	137	4	1	7,7
321	0	138	0	0	3,38
322	0	139	0	0	3,06
323	0	140	0	0	2,9
324	0	140	2	0	2,71
325	0	140	6	0	3,49
326	0	141	0	0	5,1
327	0	142	0	1	6,31
328	0	143	0	1	9,21
329	0	144	0	0	2,87
330	0	145	0	0	5,37
331	0	146	0	0	3,63
332	0	147	0	1	5,39
333	0	148	0	1	7,96
334	0	149	0	0	3,22
335	0	150	0	1	8,19
336	0	151	0	1	5,53
337	0	152	0	0	2,91
338	0	153	0	0	4,86
339	0	154	0	0	3,97
340	0	155	0	0	5,91
341	0	156	0	0	9,36
342	0	157	0	1	11,2
343	0	158	0	0	5,59
344	0	159	0	0	5,66
345	0	160	0	0	6,87
346	0	161	0	1	5,78
347	0	162	0	1	7,3
348	0	163	0	0	8,38
349	0	164	0	1	4,17
350	0	165	0	1	6,66
351	0	166	0	1	5,04
352	0	167	0	0	1,44
353	0	168	0	0	2,3
355	0	170	0	0	7,4
356	0	171	0	0	11,12
357	0	172	0	0	6,78
358	0	173	0	1	2,9
359	0	174	0	0	10,64
360	0	175	0	1	5,9
361	0	176	0	0	2,76
362	0	177	0	0	10,99
363	0	178	0	1	4
364	0	179	0	0	5,6
365	0	179	2	0
366	0	179	3	0
367	0	179	5	0	7,45
368	0	179	6	0
369	0	179	6	0
370	0	179	7	0
371	0	179	8	0
372	0	179	9	0	15,52
373	0	179	10	0	14,07
374	0	179	11	0
375	0	179	12	0	13,39
376	0	179	13	0
377	0	179	14	0	15,77
378	0	179	15	0
379	0	179	16	0	10,68
380	0	180	0	1	7,29
381	0	181	0	0	8,25
382	0	182	0	0	3,9
383	0	183	0	0	6,15
384	0	184	0	0	3,6
385	0	185	0	0	1,32
386	0	186	0	1	2,38
387	0	187	0	0	4,45
388	0	188	0	1	2,61
389	0	189	0	1	4,73
390	0	189	2	1
391	0	189	4	1	7,33
392	0	190	0	0	3,19
393	0	191	0	0	4,17
394	0	192	0	0	16,22
395	0	193	0	0	5,11
396	0	194	0	1	3,61
397	0	195	0	0	8,86
398	0	196	0	1	7,79
399	0	197	0	0	5,33
400	0	198	0	0	6,92
401	0	199	0	1	8,78
402	0	200	0	1	4,26
403	0	201	0	1	5,62
404	0	202	0	1	7,04
405	0	203	0	1	4,98
406	0	204	0	0	4,23
407	0	205	0	0	3,69
408	0	206	0	0	1,38
409	0	207	0	0	5,27
410	0	208	0	1	1,78
411	0	209	0	0	6,38
412	0	210	0	1	6,27
413	0	211	0	0	5,93
414	0	212	0	1	3,99
415	0	213	0	1	4,84
416	0	214	0	1	3,06
417	0	215	0	1	3,17
418	0	216	0	0	1,77
419	0	216	2	0	2,48
420	0	216	3	0
421	0	216	4	0	3,4
422	0	216	6	0
423	0	216	7	0
424	0	216	9	0	1,75
425	0	217	0	1	3,72
426	0	217	3	1	11,77
427	0	217	5	1	6,65
428	0	217	7	1
429	0	218	0	0	7,39
430	0	219	0	0	3,49
431	0	220	0	1	8,1
432	0	221	0	0	8,79
433	0	222	0	0	6,48
434	0	223	0	1	3,32
435	0	224	0	1	4,88
436	0	225	0	1	3,65
437	0	226	0	0	3,25
438	0	227	0	0	4,18
439	0	228	0	0	3,08
440	0	229	0	0	2,05
441	0	230	0	0	2,69
442	0	231	0	1	2,71
443	0	232	0	0	5,6
444	0	233	0	0	8,29
445	0	234	0	0	4,81
446	0	235	0	0	5,25
447	0	236	0	0	2,79
448	0	237	1	1	12,67
449	0	237	1	1	12,68
450	0	237	1	1	13,2
451	0	237	2	1	14,42
452	0	237	3	1	10,5
453	0	237	4	1	6,46
454	0	237	5	1	6,29
455	0	238	11	1	12,2
456	0	238	12	1	4,95
457	0	238	13	1	6,43
458	0	238	14	1	5,61
459	0	238	15	1	6,67
460	0	238	16	1	8,16
461	0	239	0	0	6,04
462	0	240	1	0	3,28
463	0	240	3	0	4,68
464	0	240	4	0	4,25
465	0	241	0	1	10,72
466	0	241	0	1	7,86
467	0	241	1	1	11,78
468	0	241	2	1	7,79
469	0	241	2	1	8,35
470	0	241	3	1	7,98
471	0	241	4	1	7,13
472	0	241	5	1	5,69
473	0	241	5	1	5,34
474	0	241	6	1	5,96
475	0	242	0	1	12,41
476	0	242	1	1	10,65
477	0	242	1	1	9,98
478	0	242	1	1	6,45
479	0	242	2	1	3,86
480	0	242	2	1	3,48
481	0	243	8	1	9,53
482	0	243	9	1	9,64
483	0	243	9	1	10,26
484	0	243	10	1	8,24
485	0	243	11	1	10,89
486	0	244	2	0	4,15
487	0	244	6	0	2,53
488	0	245	2	1	18,61
489	0	246	0	0	5,7
490	0	246	2	0	5,05
491	0	247	2	0	4,72
492	0	247	4	0	5,93
493	0	247	5	0	5,77
494	0	247	6	0	5,93
495	0	248	1	0	2,83
496	0	248	2	0	3,49
497	0	248	3	0	4,12
498	0	248	4	0	4,45
499	0	249	2	1	13,16
500	0	249	3	1	7,71
501	0	249	3	1	7,27
502	0	249	4	1	4,37
503	0	249	4	1	5,03
504	0	249	4	1	6,29
505	0	249	5	1	6,28
506	0	249	6	1	6,25
507	0	249	7	1	6,43
508	0	250	2	0	5,15
509	0	250	5	0	9,02
510	0	250	6	0	8,72
511	0	251	2	0	3,13
512	0	251	3	0	1,44
513	0	251	5	0	0,55
514	0	252	7	1	8,46
515	0	252	8	1	7,89
516	0	252	9	1	6,65
517	0	252	10	1	6,59
518	0	252	11	1	8,35
519	0	252	12	1	10,54
520	0	253	6	1	4,33
521	0	253	7	1	3,71
522	0	253	7	1	4,28
523	0	253	7	1	2,14
524	0	253	7	1	4,3
525	0	253	8	1	3,72
526	0	253	9	1	3,81
527	0	254	6	1	22,76
528	0	255	6	0	4,81
529	0	255	7	0	5,06
530	0	255	8	0	4,12
531	0	255	9	0	3,56
532	0	255	10	0	5,41
533	0	256	1	0	3,33
534	0	256	2	0	2,97
535	0	257	1	1	10,66
536	0	257	3	1	9,6
537	0	257	4	1	10,34
538	0	257	5	1	10,93
539	0	258	2	0	3,66
540	0	258	3	0	5,18
541	0	259	7	0	5,66
542	0	259	8	0	5,53
543	0	260	0	1	5,36
544	0	260	2	1	8,98
545	0	260	4	1	4,43
546	0	260	5	1	5,2
547	0	260	6	1	7,77
548	0	261	6	1	5,53
549	0	261	7	1	5,07
550	0	261	8	1	6,07
551	0	261	9	1	7,85
552	0	261	11	1	7,08
553	0	261	12	1	7,11
554	0	261	12	1	7,27
555	0	262	2	0	1,99
556	0	262	4	0	3,02
557	0	262	5	0	3,12
558	0	262	6	0	4,08
559	0	262	7	0	5,08
560	0	263	7	0	3,42
561	0	263	11	0	3,06
562	0	263	12	0	3,42
563	0	264	3	0	2,35
564	0	264	4	0	2,55
565	0	264	5	0	3,14
566	0	264	7	0	2,97
567	0	265	0	1	3,77
568	0	265	1	1	3,55
569	0	265	2	1	4,37
570	0	266	0	1	3,64
571	0	266	4	1	5,96
572	0	266	5	1	5,43
573	0	266	6	1	4,16
574	0	266	7	1	5,92
575	0	267	0	0	4,24
576	0	267	2	0	3,41
577	0	268	2	1	17,85
578	0	268	2	1	15,33
579	0	268	3	1	17,08
580	0	268	3	1	17,05
581	0	269	4	0	3,35
582	0	270	3	1	11,83
583	0	270	4	1	6,17
584	0	270	5	1	4,63
585	0	271	7	1	8,52
586	0	271	8	1	8,9
587	0	271	9	1	8,21
588	0	271	9	1	8,03
589	0	272	0	0	4,91
590	0	272	2	0	5,72
591	0	272	5	0	3,82
592	0	273	0	0	5,82
593	0	274	1	0	4,98
594	0	274	3	0	6,2
595	0	274	4	0	6,18
596	0	275	2	1	3,73
597	0	275	3	1	4,89
598	0	275	4	1	3,61
599	0	275	5	1	7,03
600	0	275	6	1	9,34
601	0	275	7	1	12,23
602	0	276	6	0	2,72
603	0	276	8	0	3,2
604	0	276	9	0	2,91
605	0	277	2	0	4,77
606	0	277	4	0	4,93
607	0	277	6	0	4,41
608	0	277	7	0	4,38
609	0	278	2	0	4
610	0	278	3	0	4,67
611	0	278	4	0	5,05
612	0	279	0	0	3,31
613	0	279	2	0	3,66
614	0	279	6	0	7,61
615	0	279	9	0	5,53
616	0	280	0	0	5,34
617	0	281	16	1	7,29
618	0	282	5	0	5,16
619	0	283	1	1	4,7
620	0	284	4	0	5,22
621	0	284	5	0	5,31
622	0	284	6	0	4,61
623	0	284	7	0	7,09
624	0	285	1	0	4,76
625	0	285	3	0	2,56
626	0	285	4	0	2,76
627	0	286	0	0	2,95
628	0	286	2	0	5,82
629	0	286	3	0	3,47
630	0	286	5	0	3,87
631	0	287	4	0	4,68
632	0	287	6	0	2,99
633	0	288	7	1	7,01
634	0	288	8	1	8,93
635	0	288	8	1	9,05
636	0	288	9	1	14,45
637	0	288	9	1	14,09
638	0	288	9	1	14,12
639	0	288	9	1	13,46
640	0	288	10	1	13,52
641	0	288	11	1	14,79
642	0	288	11	1	12,12
643	0	288	11	1	10,72
644	0	289	2	0	3,63
645	0	290	2	0	7,02
646	0	290	4	0	6,62
647	0	290	6	0	7,72
648	0	291	2	0	9,54
649	0	291	4	0	8,72
650	0	291	6	0	9,33
651	0	292	3	1	4,87
652	0	292	4	1	7,42
653	0	292	5	1	6,59
654	0	293	15	0	7,63
655	0	293	17	0	6,47
656	0	294	4	0	4,63
657	0	294	6	0	2,88
658	0	294	7	0	2,64
659	0	295	25	1	15,29
660	0	296	3	0	3,11
661	0	296	4	0	4,26
662	0	297	2	0	3,2
663	0	297	4	0	4
664	0	298	0	0	3,96
665	0	298	2	0	7,39
666	0	298	3	0	7,62
667	0	298	4	0	4,55
668	0	298	5	0	4,8
669	0	299	3	0	5,96
670	0	299	5	0	4,97
671	0	299	7	0	6,6
672	0	300	2	0	9,27
673	0	300	3	0	6,62
674	0	300	4	0	4,22
675	0	300	6	0	3,89
676	0	301	0	0	1,57
677	0	301	9	0	1,17
678	0	301	12	0	1,43
679	0	302	2	0	6,99
680	0	302	3	0	6,83
681	0	302	4	0	9
682	0	303	2	0	2,08
683	0	304	2	0	3,71
684	0	305	3	0	2,68
685	0	305	4	0	2,33
686	0	306	1	0	7,31
687	0	307	1	1	9,11
688	0	307	3	1	11,24
689	0	307	4	1	10,71
690	0	308	1	1	4,25
691	0	308	2	1	6,34
692	0	309	1	1	8,33
693	0	309	2	1	6,83
694	0	309	3	1	7,1
695	0	309	3	1	7,21
696	0	309	4	1	7,45
697	0	310	1	0	6,11
698	0	310	3	0	5,09
699	0	310	4	0	3,95
700	0	311	2	0	5,62
701	0	311	3	0	5,51
702	0	311	4	0	5,4
703	0	312	2	0	3,34
704	0	312	3	0	2,85
705	0	313	2	0	1,95
706	0	313	3	0	1,99
707	0	313	4	0	2,13
708	0	314	2	0	6,75
709	0	314	3	0	5,85
710	0	314	4	0	5,15
711	0	315	2	1	11,98
712	0	316	2	0	2,34
715	0	318	1	0	1,66
716	0	318	2	0	2,03
717	0	318	4	0	2,01
718	0	318	7	0	4,31
719	0	318	9	0	3,85
720	0	319	2	1	7,59
721	0	319	3	1	8,04
722	0	319	4	1	9,07
723	0	319	5	1	10,05
724	0	319	6	1	9,67
725	0	319	9	1	10,35
726	0	319	10	1	8,9
727	0	319	11	1	10,15
728	0	319	12	1	11,74
729	0	319	13	1	10,77
730	0	320	0	1	9,19
731	0	321	0	0	11,59
732	0	321	3	0	6,09
733	0	322	0	0	3,45
734	0	322	1	0	2,88
735	0	323	0	0	2,53
736	0	323	4	0	1,72
737	0	324	3	0	5,57
738	0	325	2	0	1,56
739	0	326	0	1	11,34
740	0	326	1	1	6,82
741	0	326	2	1	8,71
742	0	326	3	1	7,19
743	0	326	4	1	8,49
744	0	327	1	0	8,64
745	0	328	2	1	12,01
746	0	328	3	1	13,69
747	0	329	0	0	10,18
748	0	329	1	0	8,6
749	0	329	2	0	7,03
750	0	329	3	0	6,46
751	0	330	0	0	3,51
752	0	331	8	1	3,59
753	0	331	9	1	3,74
754	0	331	10	1	3,89
755	0	331	11	1	4,55
756	0	331	14	1	5,64
757	0	331	15	1	6,17
758	0	331	16	1	6,17
759	0	331	17	1	7,23
760	0	331	18	1	7,25
761	0	332	0	1	11,31
762	0	332	0	1	14,5
763	0	333	5	1	4,17
764	0	333	6	1	4,15
765	0	333	7	1	5,66
766	0	334	2	0	7,86
767	0	334	3	0	8,74
768	0	335	10	1	8,6
769	0	335	11	1	10,12
770	0	335	12	1	5,55
771	0	335	13	1	7,77
772	0	335	14	1	4,87
773	0	335	19	1	5,47
774	0	335	20	1	5,78
775	0	335	21	1	5,48
776	0	336	1	1	7,56
777	0	337	0	0	4,43
778	0	338	3	0	4,59
779	0	339	0	0	6,51
780	0	340	0	0	11,28
781	0	341	9	1	10,07
782	0	341	12	1	13,71
783	0	341	13	1	10,89
784	0	341	14	1	9,09
785	0	341	15	1	12,78
786	0	341	16	1	10,63
787	0	341	21	1	13,56
788	0	341	22	1	21,85
789	0	341	23	1	25,53
790	0	342	0	0	10,48
791	0	343	3	0	3,87
792	0	344	0	0	12,02
793	0	345	2	1	2,59
794	0	346	0	0	5,88
795	0	346	3	0	5,67
796	0	347	10	0	4,4
797	0	347	11	0	4,95
798	0	348	3	1	2,14
799	0	348	6	1	0,53
800	0	349	4	1	9,54
801	0	349	4	1	9,14
802	0	349	5	1	7,24
803	0	349	6	1	7,23
804	0	349	7	1	5,17
805	0	349	12	1	14,08
806	0	349	13	1	13,49
807	0	349	14	1	8,75
808	0	349	15	1	7,32
809	0	350	5	1	5,42
810	0	350	8	1	5,64
811	0	350	9	1	5,59
812	0	350	10	1	6,77
813	0	350	11	1	7,6
814	0	350	12	1	7,32
815	0	350	17	1	5,87
816	0	350	18	1	7,39
817	0	350	19	1	6,87
818	0	351	5	0	2,66
819	0	352	0	0	2,99
820	0	352	2	0	2
821	0	353	2	1	5,77
822	0	353	3	1	5,49
823	0	353	4	1	4,67
824	0	354	3	0	3,53
825	0	355	1	1	8,07
826	0	355	5	1	7,22
827	0	355	6	1	6,5
828	0	355	7	1	6,18
829	0	355	8	1	7,29
830	0	355	11	1	15,42
831	0	355	12	1	11,58
832	0	355	13	1	8,45
833	0	355	14	1	8,21
834	0	355	15	1	7,6
835	0	356	2	1	1,58
836	0	356	5	1	2,45
837	0	356	6	1	2,66
838	0	356	7	1	3,87
839	0	356	8	1	4,55
840	0	356	9	1	4,71
841	0	356	12	1	6,03
842	0	356	13	1	5,86
843	0	356	14	1	6,44
844	0	356	15	1	9,85
845	0	356	16	1	8,17
846	0	357	0	0	4,79
847	0	358	0	0	2,86
848	0	359	1	0	5,89
849	0	359	3	0	6,2
850	0	359	9	0	7,14
851	0	360	1	1	5,07
852	0	360	2	1	5,7
853	0	360	3	1	8,13
854	0	360	4	1	8,62
855	0	360	7	1	6,58
856	0	360	8	1	7,78
857	0	360	9	1	5,83
858	0	360	10	1	10,85
859	0	360	10	1	10,52
860	0	360	11	1	9,93
861	0	361	1	1	8,1
862	0	361	2	1	6,47
863	0	361	9	1	7,47
864	0	361	10	1	5,63
865	0	361	11	1	6,99
866	0	362	0	0	3,86
867	0	363	2	0	7,25
868	0	364	4	0	4,22
869	0	364	6	0	4,02
870	0	365	0	0	11,32
871	0	365	5	0	9,62
872	0	365	6	0	10,14
873	0	365	7	0	8,4
874	0	365	8	0	10,33
875	0	365	9	0	12,03
876	0	366	3	0	4,65
877	0	367	0	0	8,61
878	0	367	2	0	8,44
879	0	368	10	1	4,45
880	0	369	3	0	4,31
881	0	369	5	0	3,96
882	0	369	8	0	3,36
883	0	370	0	0	4,2
884	0	371	0	0	7,28
885	0	372	5	0	3,76
886	0	373	0	0	4,1
887	0	374	0	0	11,53
888	0	375	0	0	3,41
889	0	375	2	0	3,32
890	0	375	6	0	4,5
891	0	376	0	0	4,53
892	0	376	0	0	4,42
893	0	377	0	1	6,65
894	0	377	1	1	7,61
895	0	377	2	1	14,95
896	0	377	5	1	6,45
897	0	377	6	1	6,62
898	0	377	7	1	6,42
899	0	377	8	1	5,97
900	0	377	9	1	7,18
901	0	378	0	1	7,75
902	0	378	2	1	10,07
903	0	378	3	1	10,88
904	0	378	6	1	12,1
905	0	378	7	1	14,02
906	0	378	8	1	15,27
907	0	378	9	1	17,09
908	0	378	10	1	19,31
909	0	379	0	0	1,27
910	0	380	0	0	3,67
911	0	381	2	0	4,48
912	0	382	2	1	3,6
913	0	383	4	0	4,4
914	0	384	1	1	6,84
915	0	384	2	1	9,74
916	0	384	5	1	10,23
917	0	384	6	1	8,11
918	0	384	7	1	7,41
919	0	384	8	1	9,52
920	0	384	8	1	9,35
921	0	385	1	1	5,31
922	0	386	0	0	4,12
923	0	386	1	0	3,44
924	0	387	4	0	5,65
925	0	388	1	0	9,33
926	0	389	2	0	2,93
927	0	389	6	0	3,9
928	0	390	2	0	5,99
929	0	390	6	0	6,23
930	0	390	10	0	7,92
931	0	391	0	1	13,33
932	0	392	2	1	5,21
933	0	392	5	1	6,32
934	0	393	5	0	3,8
935	0	394	2	0	1,01
936	0	395	2	0	5,82
937	0	396	2	0	7,51
938	0	397	2	0	3,5
939	0	397	5	0	4,06
940	0	398	6	0	11,2
941	0	399	2	0	9,29
942	0	400	0	0	6,22
943	0	400	1	0	3,94
944	0	400	4	0	5,72
945	0	401	4	1	5,43
946	0	401	5	1	4,51
947	0	401	6	1	4,27
948	0	401	7	1	5,22
949	0	401	8	1	6,82
950	0	402	3	0	3,2
951	0	403	2	0	10,08
952	0	404	2	0	6,28
953	0	405	2	1	4,86
954	0	405	5	1	9,74
955	0	405	5	1	10,58
956	0	405	6	1	7,42
957	0	406	0	1	6,56
958	0	406	2	1	8,55
959	0	406	3	1	7,45
960	0	406	4	1	7,58
961	0	407	2	0	3,92
962	0	407	6	0	9,38
963	0	407	7	0	9,14
964	0	407	9	0	7,55
965	0	407	13	0	10,33
966	0	408	0	0	4,46
967	0	408	3	0	5,04
968	0	409	2	0	4,5
969	0	409	5	0	4,51
970	0	410	0	0	5,01
971	0	410	2	0	6,54
972	0	411	0	0	4,3
973	0	412	2	1	3,46
974	0	412	5	1	4,64
975	0	412	6	1	5,73
976	0	413	0	1	4,71
977	0	413	3	1	7,35
978	0	413	4	1	9,27
979	0	413	5	1	6,98
980	0	413	6	1	6,71
981	0	413	7	1	6,76
982	0	414	1	0	5,43
983	0	415	1	0	5,93
984	0	416	0	0	4,91
985	0	416	1	0	4,31
986	0	417	0	0	7,94
987	0	417	1	0	7,77
988	0	417	2	0	8,95
989	0	417	4	0	8,69
990	0	417	7	0	6,49
991	0	417	9	0	5,96
992	0	418	13	0	7,37
993	0	418	14	0	5,47
994	0	418	17	0	5,29
995	0	418	18	0	4,45
996	0	418	19	0	6,19
997	0	418	21	0	4,33
998	0	418	24	0	5,42
999	0	418	26	0	6,57
1000	0	419	0	0	3,29
1001	0	419	2	0	4,29
1002	0	419	3	0	4,63
1003	0	420	0	1	6,1
1004	0	420	1	1	4,65
1005	0	421	0	1	6
1006	0	421	0	1	5,88
1007	0	422	0	1	12,09
1008	0	422	1	1	10,43
1009	0	422	2	1	11,44
1010	0	423	0	1	9,64
1011	0	423	2	1	11,13
1012	0	423	4	1	12,8
1013	0	424	0	0	4,63
1014	0	424	1	0	4,2
1015	0	424	5	0	6,73
1016	0	424	7	0	7,95
1017	0	425	12	1	18,62
1018	0	426	0	1	3,04
1019	0	427	0	1	10,34
1020	0	427	1	1	9,42
1021	0	428	0	0	2,14
1022	0	428	3	0	4,17
1023	0	428	4	0	7,05
1024	0	428	6	0	3,21
1025	0	429	0	1	3,55
1026	0	429	1	1	2,34
1027	0	429	2	1	2,73
1028	0	429	5	1	2,69
1029	0	429	8	1	5,5
1030	0	429	11	1	8,63
1031	0	430	1	1	6,88
1032	0	431	0	0	3,27
1033	0	432	0	0	20,76
1034	0	432	1	0	18,58
1035	0	432	3	0	11,32
1036	0	433	0	0	4,88
1037	0	433	1	0	3,96
1038	0	433	2	0	2,65
1039	0	434	0	0	6,66
1040	0	434	1	0	5,8
1041	0	434	3	0	5,32
1042	0	434	5	0	8,39
1043	0	434	7	0	10,99
1044	0	435	8	0	7,95
1045	0	435	11	0	9,09
1046	0	436	0	1	4,43
1047	0	437	0	1	6,05
1048	0	437	2	1	7,57
1049	0	438	0	0	1,93
1050	0	438	2	0	2,8
1051	0	438	4	0	3,19
1052	0	439	0	1	7,07
1053	0	439	2	1	8,47
1054	0	440	2	0	3,48
1055	0	441	0	0	7,57
1056	0	441	1	0	7,85
1057	0	441	3	0	5,24
1058	0	442	0	1	5,4
1059	0	442	1	1	5,55
1060	0	442	2	1	7,35
1061	0	442	3	1	10,91
1062	0	442	6	1	16,06
1063	0	443	0	1	4,45
1064	0	443	2	1	2,83
1065	0	443	4	1	3,38
1066	0	443	5	1	6,16
1067	0	444	0	1	5,01
1068	0	444	1	1	4,11
1069	0	445	0	0	2,61
1070	0	445	1	0	3,06
1071	0	445	6	0	3,19
1072	0	445	8	0	3,63
1073	0	445	10	0	3,56
1074	0	445	13	0	3,47
1075	0	446	2	1	2,18
1076	0	446	6	1	2,4
1077	0	446	8	1	4,38
1078	0	446	11	1	5,51
1079	0	446	18	1	5,09
1080	0	446	20	1	6,83
1081	0	447	1	0	4,45
1082	0	447	3	0	5,28
1083	0	447	6	0	5,63
1084	0	447	8	0	5,33
1085	0	447	10	0	5,83
1086	0	447	13	0	4,44
1087	0	448	0	0	9,31
1088	0	448	2	0	3,08
1089	0	449	0	0	10,18
1090	0	449	1	0	13,12
1091	0	449	4	0	8,77
1092	0	449	6	0	10,28
1093	0	449	8	0	8,78
1094	0	450	0	0	10,3
1095	0	450	2	0	6,13
1096	0	450	3	0	8,86
1097	0	450	5	0	9,19
1098	0	451	0	0	7,44
1099	0	452	0	1	17,98
1100	0	453	0	1	6,42
1101	0	453	4	1	9,46
1102	0	453	6	1	7,82
1103	0	453	8	1	8,46
1104	0	454	7	0	8,51
1105	0	454	10	0	8,01
1106	0	455	0	1	7,09
1107	0	455	2	1	5,79
1108	0	455	4	1	11,32
1109	0	456	0	0	8,39
1110	0	456	4	0	6,63
1111	0	457	1	0	2,38
1112	0	457	3	0	3,42
1113	0	457	5	0	3,48
1114	0	457	8	0	4,14
1115	0	457	10	0	3,63
1116	0	457	12	0	4,8
1117	0	458	0	0	4,64
1118	0	458	1	0	3,49
1119	0	459	0	1	6,65
1120	0	460	0	1	2,09
1121	0	460	2	1	3,23
1122	0	461	0	0	2,95
1123	0	461	3	0	5,26
1124	0	462	1	0	2,34
1125	0	463	0	1	4,93
1126	0	464	0	0	5,91
1127	0	464	1	0	4,94
1128	0	464	3	0	5,85
1129	0	465	0	0	9,42
1130	0	465	3	0	5,49
1131	0	466	0	0	6,43
1132	0	467	0	0	3,52
1133	0	468	0	1	9,38
1134	0	468	1	1	10,84
1135	0	469	0	0	1,31
1136	0	469	1	0	0,81
1137	0	470	0	0	4,17
1138	0	471	0	0	3,52
1139	0	471	1	0	4,31
1140	0	471	4	0	5,49
1141	0	472	0	1	13,93
1143	0	472	11	1	13,07
1144	0	472	13	1	20,86
1145	0	473	0	1	8,14
1146	0	473	1	1	5,29
1147	0	473	3	1	5,77
1148	0	474	3	0	4,67
1149	0	474	5	0	4,47
1150	0	475	0	1	3,04
1151	0	476	0	0	2,96
1152	0	476	1	0	4,19
1153	0	477	0	1	6,57
1154	0	477	4	1	8,27
1155	0	477	6	1	11,17
1156	0	477	8	1	11,06
1157	0	477	10	1	17,18
1158	0	478	0	0	3,56
1159	0	478	1	0	2,89
1160	0	478	4	0	3,93
1161	0	479	0	0	3,16
1162	0	479	2	0	3,44
1163	0	479	4	0	4,51
1164	0	479	7	0	5,81
1165	0	480	0	0	11,94
1166	0	480	1	0	9,83
1167	0	480	4	0	4,22
1168	0	480	6	0	4,46
1169	0	481	0	0	8,93
1170	0	482	0	0	7,11
1171	0	483	2	1	9,42
1172	0	484	0	0	3,27
1173	0	484	1	0	2,86
1174	0	485	0	0	3,84
1175	0	485	2	0	6,25
1176	0	485	5	0	8,99
1177	0	485	7	0	9,95
1178	0	485	9	0	9,5
1179	0	486	0	0	2,69
1180	0	486	3	0	3,97
1181	0	487	0	1	13,39
1182	0	487	1	1	12,78
1183	0	487	3	1	11,03
1184	0	487	5	1	15,61
1185	0	488	0	1	5,92
1186	0	488	2	1	3,61
1187	0	488	4	1	2,54
1188	0	488	7	1	4,56
1189	0	489	0	0	9,17
1190	0	489	4	0	5,87
1191	0	490	4	0	6,05
1192	0	490	7	0	3,78
1193	0	491	1	1	6,28
1194	0	491	2	1	6,35
1195	0	491	3	1	7,22
1196	0	491	6	1	4,93
1197	0	491	8	1	5,52
1198	0	491	10	1	4,71
1199	0	492	0	0	8,8
1200	0	492	1	0	9,78
1201	0	493	0	0	6,21
1202	0	493	1	0	2,46
1203	0	494	0	0	2,89
1204	0	494	2	0	3,69
1205	0	494	3	0	4,11
1206	0	495	0	1	14,76
1207	0	495	2	1	8,54
1208	0	495	4	1	11,52
1209	0	495	6	1	11,9
1210	0	495	6	1	12,47
1211	0	495	7	1	11,7
1212	0	496	0	1	9,53
1213	0	496	1	1	10,42
1214	0	497	9	1	6,84
1215	0	497	12	1	6,86
1216	0	498	0	0	3,79
1217	0	498	1	0	2,91
1218	0	498	3	0	6,85
1219	0	498	5	0	5,45
1220	0	499	0	0	4,95
1221	0	500	0	1	4,2
1222	0	500	1	1	3,77
1223	0	500	2	1	5,54
1224	0	500	4	1	7,06
1225	0	500	7	1	11,84
1226	0	500	9	1	13,96
1227	0	501	0	0	3,18
1228	0	501	4	0	3,27
1229	0	501	6	0	3,74
1230	0	501	8	0	4,2
1231	0	501	11	0	3,45
1232	0	502	0	0	3,16
1233	0	503	0	1	3,82
1234	0	503	1	1	2,64
1235	0	504	0	0	9,53
1236	0	504	13	0	18,42
1237	0	504	15	0	8,2
1238	0	504	18	0	8,53
1239	0	505	0	0	3,65
1240	0	506	0	1	3,48
1241	0	506	2	1	4,07
1242	0	507	0	0	4,76
1243	0	507	7	0	10,04
1244	0	508	0	0	4,98
1245	0	509	0	0	2,74
1246	0	510	0	0	9,07
1247	0	510	2	0	9,79
1248	0	510	4	0	6,7
1249	0	510	7	0	8,95
1250	0	511	0	1	6,67
1251	0	511	1	1	8,35
1252	0	512	0	0	14,94
1253	0	512	1	0	9,73
1254	0	512	3	0	6,78
1255	0	512	5	0	7,24
1256	0	512	8	0	10,21
1257	0	512	12	0	7,76
1258	0	513	0	1	4,91
1259	0	513	1	1	4,24
1260	0	513	3	1	4,37
1261	0	514	0	1	7,11
1262	0	514	1	1	6,67
1263	0	514	3	1	4,58
1264	0	514	7	1	5,96
1265	0	514	10	1	6,56
1266	0	514	11	1	5,7
1267	0	514	14	1	6,53
1268	0	514	16	1	11,7
1269	0	515	1	0	10,86
1270	0	515	4	0	5,48
1271	0	516	0	0	5,14
1272	0	516	1	0	5,44
1273	0	516	2	0	4,63
1274	0	516	4	0	4,17
1275	0	516	7	0	4,7
1276	0	517	0	0	3,22
1277	0	517	1	0	2,8
1278	0	517	3	0	3,01
1279	0	517	5	0	2,83
1280	0	517	9	0	3,35
1281	0	517	10	0
1282	0	518	0	1	6,86
1283	0	519	0	0	5,03
1284	0	519	4	0	9,25
1285	0	519	6	0	8,24
1286	0	519	8	0	5,87
1287	0	520	0	0	5,07
1288	0	520	3	0	4,14
1289	0	520	5	0	5,38
1290	0	520	8	0	5,31
1291	0	521	0	0	6,48
1292	0	522	0	0	8,51
1293	0	522	3	0	3,82
1294	0	523	0	0	3,18
1295	0	523	1	0	4,84
1296	0	524	0	1	4,62
1297	0	525	0	1	12,12
1298	0	525	1	1	10,67
1299	0	525	3	1	7,05
1300	0	526	0	0	3,99
1301	0	526	1	0	5,8
1302	0	527	0	0	2,9
1303	0	527	3	0	3,09
1304	0	527	4	0	3,66
1305	0	527	6	0	4,47
1306	0	527	8	0	3,8
1307	0	527	11	0	4,47
1308	0	528	0	1	7,25
1309	0	528	2	1	14,59
1310	0	529	0	0	6,01
1311	0	529	3	0	5,53
1312	0	529	6	0	4,69
1313	0	529	8	0	4,12
1314	0	529	13	0	3,88
1315	0	530	0	1	8,67
1316	0	530	2	1	6,69
1317	0	530	8	1	17,15
1318	0	531	0	0	2,58
1319	0	532	0	0	10,92
1320	0	533	0	0	3,03
1321	0	533	1	0	2,46
1322	0	533	4	0	4,99
1323	0	533	6	0	5,39
1324	0	534	0	1	3,3
1325	0	534	2	1	2,56
1326	0	534	4	1	1,98
1327	0	534	5	1	2,25
1328	0	534	7	1	3,58
1329	0	535	0	1	7,8
1330	0	536	0	0	7,08
1331	0	536	2	0	6,56
1332	0	537	0	0	6,87
1333	0	537	2	0	5,85
1334	0	537	4	0	5,64
1335	0	537	7	0	5,67
1336	0	538	0	0	4,15
1337	0	539	0	0	3,54
1338	0	539	1	0	3,68
1339	0	539	3	0	3,62
1340	0	539	5	0	4,96
1341	0	540	0	0	6,03
1342	0	540	2	0	5,5
1343	0	540	4	0	6,46
1344	0	540	5	0	4,97
1345	0	541	0	1	2,48
1346	0	541	1	1	2,56
1347	0	542	0	0	3,18
1348	0	542	4	0	3,03
1349	0	543	0	0	2,19
1350	0	544	0	0	1,51
1351	0	544	1	0	1,18
1352	0	544	3	0	2,35
1353	0	544	4	0	3,71
1354	0	544	6	0	2,28
1355	0	545	0	0	7,69
1356	0	545	2	0	8,61
1357	0	546	0	0	7,88
1358	0	547	0	1	7,41
1359	0	547	7	1	7,4
1360	0	547	7	1	8,82
1361	0	547	8	1	7,39
1362	0	547	9	1	6,68
1363	0	547	10	1	8,39
1364	0	547	11	1	7,54
1365	0	547	12	1	7,83
1366	0	547	13	1	6,31
1367	0	547	14	1	4,38
1368	0	547	15	1	4,15
1369	0	547	16	1	5,42
1370	0	548	0	1	5,92
1371	0	548	2	0	7,73
1372	0	549	0	0	3,19
1373	0	549	5	0	3,1
1374	0	549	9	0	2,86
1375	0	549	13	0	7,2
1376	0	549	15	0	8,25
1377	0	549	16	0	6,87
1378	0	549	19	0	7,2
1379	0	550	0	0	2,92
1380	0	551	0	0	2,67
1381	0	551	2	0
1382	0	551	6	0	4,11
1383	0	551	9	0	5,93
1384	0	552	0	0	1,58
1385	0	552	5	0	1,69
1386	0	552	7	0	2,61
1387	0	552	8	0	3,99
1388	0	553	0	0	2,89
1389	0	553	2	0	4,28
1390	0	554	0	1	8,9
1391	0	554	4	1	4,85
1392	0	554	5	1	5,64
1393	0	554	6	1	13,97
1394	0	554	7	1	10,97
1395	0	554	8	1	8,89
1396	0	554	9	1	7,67
1397	0	554	10	1	10,11
1398	0	554	11	1	10,77
1399	0	555	0	1	5,55
1400	0	555	3	1	4,54
1401	0	555	4	1	7,54
1402	0	555	5	1	9,6
1403	0	555	6	1	9,2
1404	0	555	7	1	12,45
1405	0	555	8	1	14,59
1406	0	555	9	1	13,36
1407	0	555	10	1	16,77
1408	0	555	11	1	12,42
1409	0	555	12	1	12,33
1410	0	556	0	1	6,44
1411	0	556	4	1	9,75
1412	0	556	5	1	9,29
1413	0	556	6	1	10,27
1414	0	556	7	1	14,96
1415	0	556	8	1	15,12
1416	0	556	9	1	11,84
1417	0	556	10	1	8,08
1418	0	556	11	1	7,58
1419	0	556	12	1	8,42
1420	0	556	13	1	7,82
1421	0	557	0	1	2,88
1422	0	557	2	1	3,25
1423	0	558	0	1	7,1
1424	0	558	0	1	5,9
1425	0	558	1	1	6,49
1426	0	558	2	1	4,01
1427	0	558	3	1	4,53
1428	0	558	4	1	3,5
1429	0	558	4	1	6,75
1430	0	558	5	1	5,9
1431	0	558	6	1	7,66
1432	0	558	7	1	5,79
1433	0	558	8	1
1434	0	559	0	1	2,42
1435	0	559	0	1	2,22
1436	0	559	2	1	3,45
1437	0	559	2	1	6,04
1438	0	559	3	1	9,79
1439	0	559	4	1	10,88
1440	0	559	5	1	11,56
1441	0	559	6	1	10,28
1442	0	559	7	1	6,38
1443	0	559	8	1	4,03
1444	0	559	9	1
1445	0	560	0	1	28,35
1446	0	560	1	1	26,77
1447	0	560	2	1	17
1448	0	560	3	1	17,08
1449	0	560	4	1	18,56
1450	0	560	5	1	23,32
1451	0	560	6	1	24,48
1452	0	560	7	1	20,28
1453	0	560	8	1	25,29
1454	0	560	9	1	22,31
1455	0	560	10	1	21,98
1456	0	561	0	0	8,2
1457	0	561	1	0	7,6
1458	0	561	2	0	5,68
1459	0	561	7	0	4,19
1460	0	562	0	0	5,19
1461	0	562	3	0	4,02
1462	0	563	0	0	3,8
1463	0	563	1	0	4,09
1464	0	563	2	0	4,63
1465	0	564	0	0	1,73
1466	0	564	5	0	5,61
1467	0	564	7	0	3,92
1468	0	565	0	0	3,43
1469	0	565	2	0	4,02
1470	0	565	4	0	3,46
1471	0	565	7	0	3,91
1472	0	566	0	1	3,98
1473	0	566	2	1	6,38
1474	0	566	4	1	28,97
1475	0	566	5	1	22,75
1476	0	566	5	1	12,67
1477	0	566	5	1	11,23
1478	0	566	6	1	8,85
1479	0	566	7	1	8,76
1480	0	566	10	1	6,86
1481	0	566	11	1	6,69
1482	0	567	0	1	8,03
1483	0	567	4	1	5,35
1484	0	567	5	1	7,02
1485	0	567	6	1	8,13
1486	0	567	7	1	7,83
1487	0	567	8	1	10,3
1488	0	567	9	1	10,97
1489	0	567	10	1	10,93
1490	0	567	11	1	14,71
1491	0	567	12	1	13,07
1492	0	567	13	1	14,17
1493	0	568	0	0
1494	0	568	1	0	2,67
1495	0	569	0	0	2,62
1496	0	569	1	0	2,5
1497	0	569	1	0	2,56
1498	0	570	0	0	5,16
1499	0	570	1	0	6,04
1500	0	570	3	0	3,33
1501	0	571	0	0	6,29
1502	0	571	1	0	4,96
1503	0	571	2	0	4,74
1504	0	571	3	0	5,53
1505	0	572	0	1	4,78
1506	0	572	1	1	5,55
1507	0	573	4	1	11,32
1508	0	574	2	0	1,55
1509	0	574	4	0	2,24
1510	0	574	6	0	2,59
1511	0	574	11	0	3,59
1512	0	574	13	0	3,07
1513	0	574	15	0	3,25
1514	0	574	17	0	4,08
1515	0	575	4	0	5,62
1516	0	576	13	0	5,04
1517	0	577	5	1	7,29
1518	0	577	7	1	10,88
1519	0	577	10	1	15,45
1520	0	578	4	0	2,87
1521	0	579	5	0	4,09
1522	0	579	9	0	3,44
1523	0	579	11	0	4,36
1524	0	579	13	0	4,71
1525	0	579	16	0	4,84
1526	0	580	0	1	3,96
1527	0	580	5	1	7,7
1528	0	581	2	1	5,47
1529	0	581	4	1	9,74
1530	0	581	7	1	5,72
1531	0	581	9	1	5,91
1532	0	581	11	1	4,91
1533	0	581	14	1	7,79
1534	0	582	1	1	10,07
1535	0	582	3	1	7,41
1536	0	582	4	1	4,72
1537	0	582	6	1	3,85
1538	0	582	8	1	7,89
1539	0	583	1	1	2,52
1540	0	583	2	1	3,71
1541	0	583	3	1	5,8
1542	0	583	5	1	4,72
1543	0	583	8	1	5,29
1544	0	583	10	1	7,68
1545	0	583	10	1	6,03
1546	0	583	12	1	5,29
1547	0	583	15	1	7,88
1548	0	584	1	0	3,02
1549	0	584	6	0	5,1
1550	0	584	9	0	3,98
1551	0	584	13	0	5,35
1552	0	585	1	0	3,36
1553	0	585	3	0	6,28
1554	0	585	5	0	7
1555	0	586	0	0	4,07
1556	0	586	2	0	4,22
1557	0	587	0	1	3,58
1558	0	587	2	1	3,65
1559	0	587	4	1	4,98
1560	0	587	5	1	5,94
1561	0	587	7	1	7,28
1562	0	587	9	1	5,77
1563	0	587	12	1	3,51
1564	0	588	1	0	5,92
1565	0	588	3	0	3,96
1566	0	589	1	0	3,23
1567	0	589	3	0	3,18
1568	0	590	1	0	3,39
1569	0	590	2	0	2,3
1570	0	590	5	0	3,63
1571	0	590	7	0	2,71
1572	0	591	0	0	5,16
1573	0	591	1	0	5,38
1574	0	591	2	0	6,82
1575	0	591	4	0	6,3
1576	0	592	0	0	1,67
1577	0	592	5	0	5,74
1578	0	592	7	0	4,29
1579	0	592	9	0	6,26
1580	0	592	11	0	5,79
1581	0	593	0	0	5,16
1582	0	593	3	0	4,55
1583	0	594	1	1	2,59
1584	0	594	2	1	2,43
1585	0	594	5	1	3,76
1586	0	594	5	1	3,88
1587	0	594	7	1	6,4
1588	0	594	9	1	3,46
1589	0	594	12	1	2,42
1590	0	595	0	0	2,98
1591	0	595	2	0	4,41
1592	0	596	0	0	2,04
1593	0	596	8	0	1,52
1594	0	596	9	0	2,67
1595	0	597	0	1	5,1
1596	0	597	2	1	7,01
1597	0	598	0	0	5,06
1598	0	598	2	0	3,07
1599	0	599	0	0	7,63
1600	0	599	1	0	6,66
1601	0	599	2	0	5,63
1602	0	599	4	0	6,05
1603	0	599	6	0	5,45
1604	0	599	8	0	3,97
1605	0	599	9	0	4,16
1606	0	599	11	0	4,02
1607	0	600	0	0	4,31
1608	0	600	1	0	3,14
1609	0	600	3	0	3,91
1610	0	601	0	0	2,93
1611	0	601	2	0	3,52
1612	0	601	4	0	1,56
1613	0	602	1	0	4,99
1614	0	602	3	0	3,14
1615	0	602	4	0	4,22
1616	0	602	6	0	4,11
1617	0	602	8	0	5,69
1618	0	602	10	0	6,94
1619	0	603	2	1	2,25
1620	0	603	4	1	2,33
1621	0	603	6	1	4,06
1622	0	603	7	1	4,9
1623	0	603	8	1	4,37
1624	0	603	9	1	4,21
1625	0	603	10	1	5,86
1626	0	603	11	1	4,85
1627	0	604	0	1	5,78
1628	0	604	3	1	3
1629	0	604	5	1	3,9
1630	0	604	7	1	3,76
1631	0	605	1	1
1632	0	605	4	1	2,36
1633	0	605	7	1	3,68
1634	0	605	9	1	6,19
1635	0	606	1	0	3,08
1636	0	606	2	0	3,25
1637	0	607	0	0	2,44
1638	0	607	1	0	2,1
1639	0	607	2	0	2,68
1640	0	607	4	0	4,04
1641	0	607	6	0	4,73
1642	0	607	8	0	4,71
1643	0	608	0	1	7,49
1644	0	608	2	1	7,03
1645	0	608	4	1	10,13
1646	0	609	0	1	10,04
1647	0	609	1	1	11,44
1648	0	609	3	1	11,14
1649	0	609	5	1	13,57
1650	0	609	5	1	14,42
1651	0	610	0	1	3,2
1652	0	610	2	1	3,46
1653	0	610	4	1	6,64
1654	0	610	5	1	10,15
1655	0	610	7	1	15,9
1656	0	610	10	1	12,47
1657	0	611	0	0	3,89
1658	0	611	2	0	2,98
1659	0	612	0	0	5,22
1660	0	612	2	0	4,7
1661	0	612	4	0	4,51
1662	0	613	0	1	3,41
1663	0	613	1	1	4,85
1664	0	613	6	1	4,88
1665	0	613	9	1	8,09
1666	0	614	0	0	15,68
1667	0	614	8	0	7,97
1668	0	614	10	0	4,81
1669	0	614	12	0	6,34
1670	0	614	14	0	4,94
1671	0	614	16	0	4,92
1672	0	614	18	0	6,25
1673	0	615	1	0	8,18
1674	0	615	2	0	9,75
1675	0	615	4	0	4,36
1676	0	616	1	1	5,12
1677	0	616	3	1	3,86
1678	0	616	4	1	3,92
1679	0	616	6	1	6,81
1680	0	617	0	1	5,89
1681	0	617	1	1	3,39
1682	0	617	3	1	5,37
1683	0	617	5	1	8,32
1684	0	618	2	0	3,76
1685	0	618	4	0	4,67
1686	0	618	6	0	4,64
1687	0	618	8	0	5,07
1688	0	619	2	0	3,88
1689	0	619	4	0	4,59
1690	0	620	3	1	9,27
1691	0	620	3	1	9,78
1692	0	620	5	1	5,86
1693	0	620	8	1	9,9
1694	0	621	2	1	6,74
1695	0	622	0	0	10,45
1696	0	622	5	0	6,31
1697	0	623	0	0	3,14
1698	0	623	2	0	0,6
1699	0	623	4	0	0,72
1700	0	623	6	0	1,29
1701	0	624	0	1	7,64
1702	0	624	1	1	4,67
1703	0	624	3	1	9,29
1704	0	625	0	1	2,3
1705	0	625	2	1	7,82
1706	0	625	3	1	8,42
1707	0	625	4	1	10,77
1708	0	625	7	1	20,44
1710	0	627	0	0	1,59
1711	0	627	1	0
1712	0	627	3	0	1,86
1713	0	627	5	0	2,81
1714	0	628	0	0	4,03
1715	0	628	1	0	4,93
1716	0	628	3	0	5,88
1717	0	629	0	0	3,29
1718	0	629	1	0	4,5
1719	0	629	5	0	4,46
1720	0	630	0	0	10,27
1721	0	630	1	0	9,99
1722	0	630	3	0	5,3
1723	0	631	0	0	1,43
1724	0	631	2	0	3,72
1725	0	631	4	0	2,23
1726	0	631	6	0	3,14
1727	0	632	0	0	3,27
1728	0	632	2	0	2,85
1729	0	632	4	0	3,78
1730	0	632	6	0	5,41
1731	0	633	0	0	2,66
1732	0	633	3	0	5,22
1733	0	633	5	0	4,84
1734	0	633	7	0	6,1
1735	0	634	0	1	3,98
1736	0	634	2	1	6,36
1737	0	634	5	1	8,75
1738	0	634	8	1	7,48
1739	0	635	0	0	4,06
1740	0	635	5	0	5,3
1741	0	635	6	0	6,44
1742	0	636	0	0	5,35
1743	0	636	1	0	4,89
1744	0	636	3	0	3,94
1745	0	636	5	0	4,18
1746	0	637	0	0	6,5
1747	0	637	2	0	5,91
1748	0	637	4	0	6,9
1749	0	638	0	0	4,86
1750	0	638	2	0	5,15
1751	0	639	0	0	2,83
1752	0	639	1	0	4,12
1753	0	639	3	0	3,27
1754	0	640	0	1	3,73
1755	0	640	2	1	4,85
1756	0	640	6	1	9,43
1757	0	640	8	1	17,12
1758	0	641	0	1	8,13
1759	0	641	1	1	9,65
1760	0	642	0	0	3,13
1761	0	642	5	0	2,3
1762	0	642	7	0	2,23
1763	0	643	0	0	8,28
1764	0	643	1	0	6,84
1765	0	643	3	0	5,8
1766	0	643	5	0	10,42
1767	0	643	7	0	13,73
1768	0	644	0	0	8,92
1769	0	644	1	0	6,18
1770	0	645	0	0	1,9
1771	0	645	9	0	3,96
1772	0	645	13	0	2,46
1773	0	646	0	1	7,04
1774	0	646	2	1	10,6
1775	0	646	6	1	17,74
1776	0	647	0	1	6,59
1777	0	647	2	1	7,54
1778	0	648	0	0	2,43
1779	0	649	0	0	3,24
1780	0	649	1	0	4
1781	0	649	3	0	2,09
1782	0	649	6	0	6,52
1783	0	650	2	1	5,75
1784	0	651	10	0	3,18
1785	0	651	13	0	3,87
1786	0	651	16	0	5,2
1787	0	652	0	0	2,23
1788	0	652	2	0	2,99
1789	0	652	3	0	4,32
1790	0	652	5	0	6,15
1791	0	653	0	1	4,56
1792	0	653	2	1	7,58
1793	0	653	5	1	12,54
1794	0	654	0	0	3,72
1795	0	654	2	0	1,52
1796	0	655	0	0	4,53
1797	0	655	2	0	3,53
1798	0	656	0	0	4,02
1799	0	656	2	0	2,77
1800	0	656	3	0	2,38
1801	0	657	0	0	4,48
1802	0	657	2	0	3,63
1803	0	658	0	0	3,5
1804	0	658	1	0	3,41
1805	0	658	3	0	7,71
1806	0	658	5	0	9,49
1807	0	659	0	1	10,1
1808	0	659	4	1	5,91
1809	0	660	0	0	8,07
1810	0	660	2	0	5,9
1811	0	661	0	0	3,12
1812	0	661	2	0	4,44
1813	0	662	0	0	0,92
1814	0	662	1	0	0,69
1815	0	662	3	0	1,32
1816	0	663	0	1	12,77
1817	0	663	2	1	11,85
1818	0	663	4	1	10,76
1819	0	664	0	0	3,17
1820	0	664	2	0	3,31
1821	0	665	0	0	1,9
1822	0	665	1	0	5,81
1823	0	665	2	0	5,42
1824	0	665	4	0	6,76
1825	0	665	5	0	8,74
1826	0	666	0	1	9,57
1827	0	666	2	1	6,85
1828	0	666	4	1
1829	0	666	6	1	10,95
1830	0	667	0	0	14,66
1831	0	668	5	1	4,85
1832	0	669	4	0	5,71
1833	0	670	0	0	4,85
1834	0	670	3	0	4,8
1835	0	671	0	0	8,6
1836	0	672	0	1	4,94
1837	0	672	1	1	4,66
1838	0	672	3	1	6,18
1839	0	673	0	0	2,45
1840	0	673	3	0	4,15
1841	0	674	0	1	10,21
1842	0	674	3	1	9,82
1843	0	675	0	0	7,99
1844	0	676	0	1	0,21
1845	0	676	1	1	0,25
1846	0	676	3	1	0,37
1847	0	677	0	1	5,66
1848	0	677	2	1	6,67
1849	0	677	4	1	7,44
1850	0	678	0	1	6,58
1851	0	678	1	1	6,95
1852	0	678	3	1	8,85
1853	0	679	0	0	3,6
1854	0	679	2	0	3,31
1855	0	680	0	0	16,79
1856	0	680	2	0	10,66
1857	0	681	0	0	3,28
1858	0	681	2	0	3,01
1859	0	682	0	0	13,53
1860	0	682	1	0	9,27
1861	0	682	3	0	5,43
1862	0	683	0	0	2,61
1863	0	683	5	0	3,35
1864	0	683	6	0	2,16
1865	0	683	7	0	2,65
1866	0	684	0	0	4,98
1867	0	684	3	0	2,78
1868	0	685	0	1	5,16
1869	0	685	1	1	7,09
1870	0	685	3	1	9,98
1871	0	686	0	1	6,39
1872	0	686	1	1	5,98
1873	0	686	2	1	9,85
1874	0	686	4	1	15,1
1875	0	687	0	1	10,77
1876	0	687	3	1	14,62
1877	0	688	0	0	5,65
1878	0	688	1	0	4,8
1879	0	689	1	0	3,71
1880	0	689	3	0	2,17
1881	0	690	0	1	4,1
1882	0	690	2	1	3,37
1883	0	691	1	0	2,19
1884	0	691	2	0	2,61
1885	0	692	0	0	3,45
1886	0	692	2	0	3,52
1887	0	693	0	1	3,77
1888	0	693	3	1	8,95
1889	0	694	0	0	7,18
1890	0	694	1	0	6,79
1891	0	694	3	0	5,21
1892	0	695	3	1	14,2
1893	0	695	4	1	19,77
1894	0	695	5	1	28,58
1895	0	695	6	1	36,57
1896	0	695	7	1	34,59
1897	0	696	3	1	7
1898	0	696	3	1	11,05
1899	0	696	3	1	7,06
1900	0	696	3	1	18,19
1901	0	696	20	1	9,62
1902	0	696	21	1	8,95
1903	0	696	22	1	9,86
1904	0	696	23	1	7,46
1905	0	696	24	1	7,09
1906	0	697	2	0
1907	0	697	3	0
1908	0	698	20	1	3,2
1909	0	698	21	1	3,92
1910	0	698	22	1	6,31
1911	0	698	23	1	3,72
1912	0	698	24	1	3,61
1913	0	698	25	1	2,75
1914	0	698	26	1	3,1
1916	0	700	0	0	5,32
1928	0	703	2	1	9,01
1929	0	703	3	1	10,11
1930	0	703	4	1	16,01
1931	0	703	5	1	14,08
1932	0	703	6	1	15,02
1933	0	703	7	1	13,24
1934	0	703	8	1	15,17
1935	0	704	2	1	5,68
1936	0	704	3	1	7,63
1937	0	704	4	1	4,67
1938	0	704	5	1	2,14
1939	0	704	6	1	2,14
1940	0	704	7	1	2,6
1941	0	704	8	1	2,77
1942	0	705	1	1	11,68
1943	0	705	3	1	10,95
1944	0	705	4	1	9,95
1945	0	705	5	1	10,52
1946	0	705	6	1	10,58
1947	0	706	5	0
1948	0	707	3	0	2,25
1949	0	707	5	0
1950	0	708	0	0	7,43
1951	0	709	0	1	8,31
1952	0	709	1	1	7,95
1953	0	709	2	1	3,99
1954	0	709	3	1	3,71
1955	0	709	4	1	4,93
1956	0	710	1	1	7
1957	0	710	1	1	8,54
1958	0	710	2	1	8,62
1959	0	710	4	1	5,42
1960	0	711	3	1	6,88
1961	0	711	3	1	4,84
1962	0	711	4	1	5,87
1963	0	712	0	1	3,79
1964	0	712	1	1	4,12
1965	0	712	2	1	6,7
1966	0	712	3	1	6,72
1967	0	712	4	1	6,64
1968	0	713	0	0	8,58
1969	0	714	3	0	4,76
1970	0	715	1	0	15,41
1971	0	716	3	0	2,77
1972	0	717	0	1	12,57
1973	0	717	0	1	12,94
1974	0	717	1	1	13,97
1975	0	717	2	1	7,66
1976	0	718	0	1	12,24
1977	0	718	1	1	14,05
1978	0	718	2	1	13,32
1979	0	719	0	0	3,99
1980	0	720	0	0	1,94
1981	0	721	0	1	13,21
1982	0	721	1	1	12,86
1983	0	722	0	0	5,8
1984	0	723	0	1	9,33
1985	0	723	1	1	12,54
1986	0	724	1	1	2,51
1987	0	724	1	1	2,91
1988	0	725	0	1	4,95
1989	0	726	0	1	8,29
1991	0	728	0	0	3,76
1992	0	729	0	1	8,99
1993	0	729	0	1	8,68
1994	0	730	0	1	7,59
1995	0	730	1	1	4,55
1996	0	730	2	1	5,99
1997	0	730	3	1	5,01
1998	0	730	4	1	5,1
1999	0	731	1	0	3,09
2000	0	732	0	0	3,37
2001	0	733	0	1	8,07
2002	0	734	0	0	1,21
2003	0	735	4	1	7,86
2004	0	735	4	1	9,08
2005	0	735	5	1	12
2006	0	735	6	1	9,52
2007	0	735	7	1	9,47
2008	0	735	8	1	9,41
2009	0	735	9	1	9,2
2010	0	736	0	0	4,19
2011	0	737	0	1	4,71
2012	0	737	1	1	4,26
2013	0	737	2	1	5,4
2014	0	738	0	0	1,49
2015	0	739	2	1
2016	0	739	4	1
2017	0	740	1	0	4,13
2018	0	740	2	0	3,99
[truncated: 589 more rows]
