# Supplementary material for: A novel haemocytometric COVID-19 prognostic score developed and validated in an observational multicentre European hospital-based study
Source: eLife journal article supplement (doi:10.7554/elife.63195), 2020-11-26
Supplement: supp [file elife-63195-supp-v1.zip › elife_poa_e63195_Figure_4_source_data_4.csv]

Figure 4 – source data file 4. Source data for trends of immature granuclocyte-to-lymphocyte ratio over 14 days of hospitalisation in critical/fatal (CF) and non-critical (NC) patients
Filename	exclusion	Pat_ID	length_of_hospitalisation	Critical_or_Fatal	IG%/L%
1	0	1	0	1	1,2
2	0	1	2	1	1,4
3	0	1	2	1	5,2
4	0	1	3	1	6,1
5	0	1	4	1	3,3
6	0	1	15	1	4
7	0	2	0	0	9,1
8	0	2	1	0	4,3
9	0	2	2	0	5,6
10	0	2	3	0	4,4
11	0	2	4	0	5,3
12	0	2	6	0	5,3
13	0	3	0	1	2,7
14	0	3	1	1	1,9
15	0	3	1	1	5,4
16	0	3	2	1	14,3
17	0	3	3	1	6,9
18	0	3	4	1	5,8
19	0	3	4	1	6,5
20	0	3	5	1	5,3
21	0	3	6	1	4,5
22	0	3	7	1	8,7
23	0	3	8	1	8,9
24	0	3	9	1	10,8
25	0	3	10	1	13,4
26	0	3	11	1	8,5
27	0	3	12	1	9,1
28	0	3	13	1	8,3
29	0	4	0	1	8,7
30	0	4	1	1	77,8
31	0	4	1	1	33,3
32	0	4	2	1	12,9
33	0	4	3	1	44,4
34	0	4	4	1	73,3
35	0	4	5	1	314,3
36	0	4	6	1	150
37	0	4	7	1	203,4
38	0	4	8	1	104,4
39	0	4	9	1	119,6
40	0	4	10	1	88,2
41	0	4	10	1	75
42	0	4	11	1	43,6
43	0	4	12	1	15,9
44	0	4	13	1	23,1
45	0	4	14	1	18,3
46	0	5	0	0	13,3
47	0	5	1	0	16,4
48	0	6	0	0	2,6
49	0	6	2	0	6,6
50	0	6	3	0	10,3
51	0	6	5	0	19,5
52	0	7	0	0	2,2
53	0	7	2	0	2,1
54	0	7	3	0	1,2
55	0	7	4	0	2,4
56	0	7	5	0	2,3
57	0	7	6	0	2,3
58	0	8	1	0	0,6
59	0	9	0	0	13,9
60	0	9	2	0
61	0	9	3	0	10,6
62	0	9	4	0	13,1
63	0	9	5	0	15,7
64	0	9	7	0	15,7
65	0	10	0	1	3,1
66	0	10	1	1	6,4
67	0	10	3	1	14
68	0	10	4	1	32,1
69	0	11	0	0	5,8
70	0	11	1	0	1,8
71	0	11	3	0	3
72	0	12	0	1	6,7
73	0	12	2	1	4,5
74	0	13	5	1	75,6
75	0	13	6	1	106,6
76	0	13	7	1	107,6
77	0	13	8	1	128,1
78	0	13	9	1	100
79	0	13	9	1	75,3
80	0	13	10	1	63,2
81	0	13	11	1	59,5
82	0	13	12	1	62,8
83	0	13	13	1	60,4
84	0	14	1	0	1,4
85	0	15	13	1	45,9
86	0	15	14	1	31,8
87	0	15	15	1	20,1
88	0	15	16	1	14,3
89	0	15	17	1	18,6
90	0	15	18	1	12,1
91	0	15	19	1	11,4
92	0	15	20	1	7,1
93	0	16	11	1	46,1
94	0	16	12	1	66,4
95	0	16	13	1	173,6
96	0	16	14	1	78,9
97	0	16	15	1	47,7
98	0	16	16	1	51,2
99	0	16	17	1	106,5
100	0	16	18	1	134,8
101	0	16	19	1	167,8
102	0	17	1	0
103	0	17	2	0	0,6
104	0	17	4	0	0,6
105	0	18	0	1	29,3
106	0	18	2	1	5,4
107	0	18	2	1	17,7
108	0	18	3	1	13,6
109	0	18	4	1	19,1
110	0	19	0	1	4,3
111	0	19	1	1	7,8
112	0	19	3	1	8,1
113	0	20	0	0	3,5
114	0	20	1	0	2
115	0	20	3	0	1,7
116	0	21	0	1	14,3
117	0	22	0	0	2
118	0	23	0	0	4,2
119	0	24	0	0	1,2
120	0	25	0	1	14
121	0	26	0	0	8,8
122	0	27	0	0	14,3
123	0	28	0	0	1,4
124	0	29	0	0	4,5
125	0	30	0	1
126	0	30	4	1	5,8
127	0	31	0	0	5,6
128	0	32	0	1	3,9
129	0	33	0	1	3
130	0	34	0	1
131	0	35	0	0	1,7
132	0	36	0	1	14,3
133	0	37	0	0	4,8
134	0	38	0	1	3,1
135	0	39	0	0	8,8
136	0	40	0	0	1,8
137	0	41	0	0	3,1
138	0	42	0	0	2,6
139	0	43	0	0	4,3
140	0	44	0	0	9,9
141	0	45	0	1	35
142	0	45	1	1
143	0	45	1	1
144	0	45	2	1	69,2
145	0	45	3	1
146	0	45	4	1	182,1
147	0	45	5	1	132,7
148	0	45	5	1
149	0	45	6	1	162,7
150	0	45	6	1
151	0	45	7	1	186
152	0	45	7	1
153	0	45	8	1	146,2
154	0	45	9	1	85,3
155	0	45	10	1	36,8
156	0	45	11	1	25,5
157	0	45	12	1	15,9
158	0	45	13	1	13,6
159	0	45	14	1	19,8
160	0	45	15	1	10,4
161	0	45	16	1	10,7
162	0	45	17	1	14,4
163	0	45	18	1	11,4
164	0	45	19	1	11,2
165	0	45	20	1	8,4
166	0	45	21	1	5,8
167	0	45	22	1	4,7
168	0	46	0	0	6,5
169	0	47	0	0	4,6
170	0	48	0	1	2,5
171	0	49	0	1
172	0	50	0	0	0,9
173	0	51	0	0	3,8
174	0	52	0	1	4,2
175	0	53	0	1	10,9
176	0	54	0	1	9,2
177	0	54	4	1	11,5
178	0	54	10	1	40,7
179	0	54	11	1	69,4
180	0	55	0	0	2,4
181	0	56	0	1	11,3
182	0	57	0	0	4,2
183	0	58	0	0	4,3
184	0	59	0	0	1,7
185	0	60	0	0	14,8
186	0	61	0	0	3,7
187	0	62	0	1	6,6
188	0	63	0	0	2,9
189	0	64	0	0	0
190	0	65	0	0
191	0	66	0	1	8
192	0	67	0	0
193	0	68	0	0	12,1
194	0	69	0	0	1
195	0	70	0	0	2,6
196	0	71	0	0	4,6
197	0	72	0	0	2
198	0	73	0	0	2,4
199	0	74	0	0	5,3
200	0	75	0	0	0,7
201	0	76	0	0
202	0	77	0	0	3,8
203	0	78	0	1	9,2
204	0	79	0	0	2,1
205	0	79	0	0
206	0	79	1	0
207	0	79	2	0
208	0	79	3	0	2,4
209	0	79	5	0	1,4
210	0	79	7	0
211	0	79	8	0	1,5
212	0	79	9	0
213	0	79	10	0	3,2
214	0	79	12	0	5,7
215	0	80	0	0	1,8
216	0	81	0	1	3
217	0	82	0	0	18,4
218	0	83	0	0	3,3
220	0	85	0	1	10,7
221	0	86	0	1	16,2
222	0	87	0	0	1,8
223	0	88	0	0	2,8
225	0	90	0	0	5,7
226	0	91	0	0	5
227	0	92	0	0	3,2
228	0	93	0	1	12,2
229	0	93	1	1
230	0	93	2	1	16,7
231	0	94	0	0	2,4
232	0	95	0	0	3,2
233	0	96	0	1	8,1
234	0	97	0	0	8,6
235	0	98	0	0	5,7
236	0	98	2	0	4,5
237	0	98	4	0
238	0	98	5	0
239	0	98	13	0	2,1
240	0	99	0	1	3,9
241	0	99	1	1	4,5
242	0	99	2	1
243	0	99	3	1
244	0	99	4	1
245	0	99	5	1
246	0	100	0	1	11,1
247	0	101	0	1	2,4
248	0	102	0	0	51,2
249	0	103	0	1	10,7
250	0	103	1	1	13,2
251	0	104	0	1	8,5
252	0	105	0	0	10,6
253	0	106	0	1	4,9
254	0	107	0	0	4,6
255	0	108	0	0	2,1
256	0	109	0	1	3,9
257	0	110	0	0	2,3
258	0	110	1	0
259	0	110	2	0
260	0	110	3	0
261	0	110	4	0
262	0	110	5	0
263	0	110	6	0
264	0	110	7	0
265	0	110	7	0
266	0	110	8	0	3,3
267	0	110	9	0	2,3
268	0	110	10	0	1,6
269	0	110	11	0	0,7
270	0	110	12	0	0,6
271	0	110	13	0	0,6
272	0	110	16	0	0,6
273	0	110	17	0	0,6
274	0	110	20	0	0,6
275	0	111	0	0	4,2
276	0	112	0	0	3,2
277	0	113	0	0	1,2
278	0	114	0	1	1,3
279	0	115	0	1	6,9
280	0	116	0	1	3,3
281	0	117	0	0	3,8
282	0	118	0	1	24,5
283	0	119	0	1	20,6
284	0	120	0	1	7,6
285	0	121	0	1	1,8
286	0	122	0	0	5,2
287	0	122	4	0
288	0	122	7	0
289	0	122	9	0
290	0	123	0	1	13,3
291	0	124	0	0	4,4
292	0	125	0	0	2,7
293	0	126	0	1	3,6
294	0	126	2	1	5,6
295	0	127	0	0	1,9
296	0	127	4	0	2,1
297	0	128	0	1	2,8
298	0	129	0	0	1,1
299	0	130	0	1	4,3
300	0	131	0	1	4,1
301	0	132	0	1	6,6
302	0	133	0	1	3,3
303	0	134	0	1	7,5
304	0	134	2	1	8,7
305	0	134	3	1	22,5
306	0	135	0	0	6,2
307	0	136	0	0	4,1
308	0	136	5	0	23,3
309	0	136	7	0	5,2
310	0	136	8	0
311	0	136	9	0	7,8
312	0	136	10	0	10,3
313	0	136	11	0	9,2
314	0	136	12	0	8,7
315	0	136	13	0	6,2
316	0	136	14	0	4,3
317	0	137	0	1	18
318	0	137	1	1	17,7
319	0	137	2	1
320	0	137	4	1	50
321	0	138	0	0	2,3
322	0	139	0	0	2,4
323	0	140	0	0	1,4
324	0	140	2	0	0,7
325	0	140	6	0	2,5
326	0	141	0	0	3,7
327	0	142	0	1	68,2
328	0	143	0	1	13,5
329	0	144	0	0	1,2
330	0	145	0	0	2,6
331	0	146	0	0	2,8
332	0	147	0	1	8,6
333	0	148	0	1	36,8
334	0	149	0	0	3
335	0	150	0	1	18,9
336	0	151	0	1	11,1
337	0	152	0	0	1,9
338	0	153	0	0	3,3
339	0	154	0	0	1,2
340	0	155	0	0	3,9
341	0	156	0	0	20,2
342	0	157	0	1	3,6
343	0	158	0	0	4,9
344	0	159	0	0	18,6
345	0	160	0	0	2,1
346	0	161	0	1	4,9
347	0	162	0	1	7,3
348	0	163	0	0	6,1
349	0	164	0	1	2,8
350	0	165	0	1	4,7
351	0	166	0	1	4,5
352	0	167	0	0	1,5
353	0	168	0	0	1,4
355	0	170	0	0	11,1
356	0	171	0	0	15,9
357	0	172	0	0	2,4
358	0	173	0	1	3
359	0	174	0	0	14,7
360	0	175	0	1	5,4
361	0	176	0	0	1,2
362	0	177	0	0	8,8
363	0	178	0	1	6
364	0	179	0	0	7,2
365	0	179	2	0
366	0	179	3	0
367	0	179	5	0	9,7
368	0	179	6	0
369	0	179	6	0
370	0	179	7	0
371	0	179	8	0
372	0	179	9	0	29,2
373	0	179	10	0	37
374	0	179	11	0
375	0	179	12	0	27,1
376	0	179	13	0
377	0	179	14	0	42,9
378	0	179	15	0
379	0	179	16	0	24,7
380	0	180	0	1	7,9
381	0	181	0	0	5,5
382	0	182	0	0	1,3
383	0	183	0	0	4,3
384	0	184	0	0	1,5
385	0	185	0	0	1,2
386	0	186	0	1	1
387	0	187	0	0	2,2
388	0	188	0	1	1,4
389	0	189	0	1	3,3
390	0	189	2	1
391	0	189	4	1	8,7
392	0	190	0	0	0,9
393	0	191	0	0	5,8
394	0	192	0	0	14,9
395	0	193	0	0	2
396	0	194	0	1	2,7
397	0	195	0	0	2,3
398	0	196	0	1	7,8
399	0	197	0	0	2,4
400	0	198	0	0	3,9
401	0	199	0	1	13,5
402	0	200	0	1	3
403	0	201	0	1	2,8
404	0	202	0	1	9,2
405	0	203	0	1	9,4
406	0	204	0	0	2
407	0	205	0	0	3,7
408	0	206	0	0	0
409	0	207	0	0	9,4
410	0	208	0	1	5,9
411	0	209	0	0	4
412	0	210	0	1	25
413	0	211	0	0	10,1
414	0	212	0	1	6,1
415	0	213	0	1	1,6
416	0	214	0	1	13,3
417	0	215	0	1	6,8
418	0	216	0	0	0,8
419	0	216	2	0	1
420	0	216	3	0
421	0	216	4	0	2,9
422	0	216	6	0
423	0	216	7	0
424	0	216	9	0	1,1
425	0	217	0	1	1,2
426	0	217	3	1	15,6
427	0	217	5	1	13
428	0	217	7	1
429	0	218	0	0	1,6
430	0	219	0	0	2,5
431	0	220	0	1	6
432	0	221	0	0	260,4
433	0	222	0	0	12
434	0	223	0	1	3,7
435	0	224	0	1	10,6
436	0	225	0	1	8,7
437	0	226	0	0	2,2
438	0	227	0	0	3
439	0	228	0	0	6,3
440	0	229	0	0	1,3
441	0	230	0	0	1,2
442	0	231	0	1	2,1
443	0	232	0	0	6,3
444	0	233	0	0	5,3
445	0	234	0	0	3,2
446	0	235	0	0	4,9
447	0	236	0	0	4
448	0	237	1	1	354,5
449	0	237	1	1	482,4
450	0	237	1	1	421,1
451	0	237	2	1	345,5
452	0	237	3	1	342,3
453	0	237	4	1	250,8
454	0	237	5	1	158,1
455	0	238	11	1	17
456	0	238	12	1	9,3
457	0	238	13	1	12,7
458	0	238	14	1	20,9
459	0	238	15	1	34,8
460	0	238	16	1	47,2
461	0	239	0	0	8
462	0	240	1	0	6,9
463	0	240	3	0	21,1
464	0	240	4	0	17
465	0	241	0	1	38,2
466	0	241	0	1	20
467	0	241	1	1	20,3
468	0	241	2	1	21,4
469	0	241	2	1	13,5
470	0	241	3	1	23,7
471	0	241	4	1	53,1
472	0	241	5	1	52,9
473	0	241	5	1	13,5
474	0	241	6	1	51,1
475	0	242	0	1	19,4
476	0	242	1	1	33,3
477	0	242	1	1	33,3
478	0	242	1	1	16,4
479	0	242	2	1	15,8
480	0	242	2	1	17,6
481	0	243	8	1	24,5
482	0	243	9	1	27,6
483	0	243	9	1	25
484	0	243	10	1	42,6
485	0	243	11	1	31,1
486	0	244	2	0	4
487	0	244	6	0	4,3
488	0	245	2	1	71,1
489	0	246	0	0	7,1
490	0	246	2	0	5
491	0	247	2	0	36,6
492	0	247	4	0	30
493	0	247	5	0	23,1
494	0	247	6	0	25,8
495	0	248	1	0	3
496	0	248	2	0	2,1
497	0	248	3	0	3,6
498	0	248	4	0	7,1
499	0	249	2	1	37
500	0	249	3	1	13,6
501	0	249	3	1	11,9
502	0	249	4	1	20
503	0	249	4	1	15,6
504	0	249	4	1	23,2
505	0	249	5	1	20,8
506	0	249	6	1	22,7
507	0	249	7	1	24,5
508	0	250	2	0	6,8
509	0	250	5	0	21,6
510	0	250	6	0	21,9
511	0	251	2	0	1,9
512	0	251	3	0	1,2
513	0	251	5	0	0,8
514	0	252	7	1	9,3
515	0	252	8	1	10,3
516	0	252	9	1	2,9
517	0	252	10	1	7,2
518	0	252	11	1	8
519	0	252	12	1	13,9
520	0	253	6	1	13,3
521	0	253	7	1	13,7
522	0	253	7	1	16,1
523	0	253	7	1	19,9
524	0	253	7	1	40,5
525	0	253	8	1	11,8
526	0	253	9	1	23,1
527	0	254	6	1	100
528	0	255	6	0	36,5
529	0	255	7	0	20,4
530	0	255	8	0	6,6
531	0	255	9	0	4,6
532	0	255	10	0	2,5
533	0	256	1	0	3
534	0	256	2	0	2
535	0	257	1	1	19,4
536	0	257	3	1	21,5
537	0	257	4	1	39
538	0	257	5	1	55,3
539	0	258	2	0	11
540	0	258	3	0	7,1
541	0	259	7	0	7,3
542	0	259	8	0	6,2
543	0	260	0	1	6,1
544	0	260	2	1	23,4
545	0	260	4	1	29,5
546	0	260	5	1	41,3
547	0	260	6	1	44,2
548	0	261	6	1	34,8
549	0	261	7	1	43,7
550	0	261	8	1	40
551	0	261	9	1	61,3
552	0	261	11	1	43,7
553	0	261	12	1	27
554	0	261	12	1	40,6
555	0	262	2	0	3,6
556	0	262	4	0	10,6
557	0	262	5	0	8,1
558	0	262	6	0	14
559	0	262	7	0	25,6
560	0	263	7	0	5,3
561	0	263	11	0	6,1
562	0	263	12	0	4,7
563	0	264	3	0	2,8
564	0	264	4	0	4,9
565	0	264	5	0	6,9
566	0	264	7	0	6,3
567	0	265	0	1	1,9
568	0	265	1	1	4,1
569	0	265	2	1	5,2
570	0	266	0	1	2
571	0	266	4	1	6,8
572	0	266	5	1	16,7
573	0	266	6	1	21
574	0	266	7	1	57,3
575	0	267	0	0	1,5
576	0	267	2	0	2,7
577	0	268	2	1	17,4
578	0	268	2	1	24,4
579	0	268	3	1	37,9
580	0	268	3	1	36,8
581	0	269	4	0	3
582	0	270	3	1	43,8
583	0	270	4	1	27,9
584	0	270	5	1	68,9
585	0	271	7	1	78,1
586	0	271	8	1	51,4
587	0	271	9	1	68,8
588	0	271	9	1	39,6
589	0	272	0	0	3,5
590	0	272	2	0	14,1
591	0	272	5	0	9,8
592	0	273	0	0	3,4
593	0	274	1	0	8,8
594	0	274	3	0	13
595	0	274	4	0	31,3
596	0	275	2	1	19,6
597	0	275	3	1	22,2
598	0	275	4	1	33,7
599	0	275	5	1	28,4
600	0	275	6	1	46,8
601	0	275	7	1	37,8
602	0	276	6	0	3,9
603	0	276	8	0	4,3
604	0	276	9	0	4,1
605	0	277	2	0	7,7
606	0	277	4	0	10,5
607	0	277	6	0	20,2
608	0	277	7	0	18,4
609	0	278	2	0	3,5
610	0	278	3	0	5,7
611	0	278	4	0	12,4
612	0	279	0	0	1,9
613	0	279	2	0	3,5
614	0	279	6	0	18
615	0	279	9	0	15,4
616	0	280	0	0	5,9
617	0	281	16	1	56
618	0	282	5	0	6,6
619	0	283	1	1	5,3
620	0	284	4	0	8,3
621	0	284	5	0	17,8
622	0	284	6	0	21,5
623	0	284	7	0	28
624	0	285	1	0	2,6
625	0	285	3	0	3
626	0	285	4	0	4,7
627	0	286	0	0	6,4
628	0	286	2	0	9,1
629	0	286	3	0	5,9
630	0	286	5	0	9,3
631	0	287	4	0	7,3
632	0	287	6	0	9,9
633	0	288	7	1	68,8
634	0	288	8	1	120,6
635	0	288	8	1	122,9
636	0	288	9	1	220,8
637	0	288	9	1	194,7
638	0	288	9	1	197,3
639	0	288	9	1	120
640	0	288	10	1	89,4
641	0	288	11	1	60,2
642	0	288	11	1	46,1
643	0	288	11	1	56,7
644	0	289	2	0	58,7
645	0	290	2	0	67,4
646	0	290	4	0	40,7
647	0	290	6	0	72,3
648	0	291	2	0	20,7
649	0	291	4	0	20,9
650	0	291	6	0	19,5
651	0	292	3	1	7,1
652	0	292	4	1	12,8
653	0	292	5	1	8,4
654	0	293	15	0	82,6
655	0	293	17	0	25,7
656	0	294	4	0	18,8
657	0	294	6	0	13,6
658	0	294	7	0	36,6
659	0	295	25	1	44,4
660	0	296	3	0	1,3
661	0	296	4	0	4,6
662	0	297	2	0	1,7
663	0	297	4	0	6,4
664	0	298	0	0	1,1
665	0	298	2	0	6,6
666	0	298	3	0	3
667	0	298	4	0	6,4
668	0	298	5	0	2,9
669	0	299	3	0	11,1
670	0	299	5	0	5,1
671	0	299	7	0	11,5
672	0	300	2	0	52,9
673	0	300	3	0	43,6
674	0	300	4	0	53,1
675	0	300	6	0	29,2
676	0	301	0	0	5,5
677	0	301	9	0	6,3
678	0	301	12	0	5,3
679	0	302	2	0	9,2
680	0	302	3	0	7,9
681	0	302	4	0	15,7
682	0	303	2	0	5,4
683	0	304	2	0	5,8
684	0	305	3	0	9,6
685	0	305	4	0	6,9
686	0	306	1	0	4,1
687	0	307	1	1	13,1
688	0	307	3	1	31,3
689	0	307	4	1	31,4
690	0	308	1	1	3,1
691	0	308	2	1	7,3
692	0	309	1	1	21,8
693	0	309	2	1	11,6
694	0	309	3	1	14,6
695	0	309	3	1	20,2
696	0	309	4	1	18,1
697	0	310	1	0	12,2
698	0	310	3	0	11,9
699	0	310	4	0	7,1
700	0	311	2	0	12,6
701	0	311	3	0	12,5
702	0	311	4	0	10,4
703	0	312	2	0	32,7
704	0	312	3	0	12,6
705	0	313	2	0	0,9
706	0	313	3	0	2,4
707	0	313	4	0	0,9
708	0	314	2	0	5,5
709	0	314	3	0	4,9
710	0	314	4	0	3,5
711	0	315	2	1	49,2
712	0	316	2	0	2,4
715	0	318	1	0	2
716	0	318	2	0	1
717	0	318	4	0	7,3
718	0	318	7	0	22
719	0	318	9	0	16,5
720	0	319	2	1	72,7
721	0	319	3	1	102
722	0	319	4	1	125,7
723	0	319	5	1	168,7
724	0	319	6	1	138,6
725	0	319	9	1	63
726	0	319	10	1	41,8
727	0	319	11	1	23,9
728	0	319	12	1	14,8
729	0	319	13	1	23,2
730	0	320	0	1	54,2
731	0	321	0	0	14,5
732	0	321	3	0	13
733	0	322	0	0	4,9
734	0	322	1	0	3,5
735	0	323	0	0	1,3
736	0	323	4	0	2,3
737	0	324	3	0	1,4
738	0	325	2	0	2,9
739	0	326	0	1	54,8
740	0	326	1	1	30,6
741	0	326	2	1	56
742	0	326	3	1	22,6
743	0	326	4	1	29,2
744	0	327	1	0	14,3
745	0	328	2	1	9,8
746	0	328	3	1	20,3
747	0	329	0	0	23,5
748	0	329	1	0	14,5
749	0	329	2	0	11,9
750	0	329	3	0	12,1
751	0	330	0	0	13
752	0	331	8	1	43,4
753	0	331	9	1	42,1
754	0	331	10	1	55,7
755	0	331	11	1	32,4
756	0	331	14	1	19,2
757	0	331	15	1	25,3
758	0	331	16	1	21,5
759	0	331	17	1	20,5
760	0	331	18	1	22,1
761	0	332	0	1	14,3
762	0	332	0	1	55,4
763	0	333	5	1	24,3
764	0	333	6	1	28,1
765	0	333	7	1	33,7
766	0	334	2	0	10,8
767	0	334	3	0	7,4
768	0	335	10	1	19,7
769	0	335	11	1	8,1
770	0	335	12	1	6,4
771	0	335	13	1	10,1
772	0	335	14	1	5,3
773	0	335	19	1	6,6
774	0	335	20	1	9,6
775	0	335	21	1	3,6
776	0	336	1	1	6,1
777	0	337	0	0	14,3
778	0	338	3	0	6,8
779	0	339	0	0	4,3
780	0	340	0	0	2,1
781	0	341	9	1	264,5
782	0	341	12	1	189,8
783	0	341	13	1	165
784	0	341	14	1	98,6
785	0	341	15	1	185,4
786	0	341	16	1	98,3
787	0	341	21	1	170,6
788	0	341	22	1	242,9
789	0	341	23	1	363,2
790	0	342	0	0	2,2
791	0	343	3	0	5,6
792	0	344	0	0	22,6
793	0	345	2	1	8,8
794	0	346	0	0	2,5
795	0	346	3	0	6,7
796	0	347	10	0	4,4
797	0	347	11	0	3,9
798	0	348	3	1	20,6
799	0	348	6	1	20
800	0	349	4	1	36,9
801	0	349	4	1	56,2
802	0	349	5	1	53,1
803	0	349	6	1	58,3
804	0	349	7	1	47,5
805	0	349	12	1	16,9
806	0	349	13	1	18
807	0	349	14	1	10,6
808	0	349	15	1	6,7
809	0	350	5	1	30,5
810	0	350	8	1	30,7
811	0	350	9	1	31,3
812	0	350	10	1	15,1
813	0	350	11	1	11,5
814	0	350	12	1	8,2
815	0	350	17	1	6,2
816	0	350	18	1	7,6
817	0	350	19	1	7,3
818	0	351	5	0	2,4
819	0	352	0	0	2,8
820	0	352	2	0	1,7
821	0	353	2	1	9,5
822	0	353	3	1	9,8
823	0	353	4	1	9,9
824	0	354	3	0	4,9
825	0	355	1	1	14,5
826	0	355	5	1	43,1
827	0	355	6	1	100
828	0	355	7	1	110,9
829	0	355	8	1	92,2
830	0	355	11	1	77,8
831	0	355	12	1	83,3
832	0	355	13	1	54,3
833	0	355	14	1	68,8
834	0	355	15	1	41,2
835	0	356	2	1	3
836	0	356	5	1	9,5
837	0	356	6	1	18,7
838	0	356	7	1	32,8
839	0	356	8	1	41,1
840	0	356	9	1	57,5
841	0	356	12	1	28,9
842	0	356	13	1	29,5
843	0	356	14	1	13,7
844	0	356	15	1	15,6
845	0	356	16	1	10,3
846	0	357	0	0	4,3
847	0	358	0	0	1,7
848	0	359	1	0	14,4
849	0	359	3	0	18,1
850	0	359	9	0	25,7
851	0	360	1	1	4,6
852	0	360	2	1	3,4
853	0	360	3	1	7,4
854	0	360	4	1	8,1
855	0	360	7	1	8,8
856	0	360	8	1	5,6
857	0	360	9	1	16,7
858	0	360	10	1	31,8
859	0	360	10	1	31,1
860	0	360	11	1	23
861	0	361	1	1	11,9
862	0	361	2	1	28,6
863	0	361	9	1	30,8
864	0	361	10	1	15,1
865	0	361	11	1	18,3
866	0	362	0	0	1,2
867	0	363	2	0	17,6
868	0	364	4	0	6,6
869	0	364	6	0	7,4
870	0	365	0	0	7,9
871	0	365	5	0	26
872	0	365	6	0	28,8
873	0	365	7	0	25,8
874	0	365	8	0	32,8
875	0	365	9	0	20,6
876	0	366	3	0	4,5
877	0	367	0	0	6,2
878	0	367	2	0	10,8
879	0	368	10	1	16,7
880	0	369	3	0	8,7
881	0	369	5	0	8
882	0	369	8	0	5,1
883	0	370	0	0	5
884	0	371	0	0	5,1
885	0	372	5	0	12,8
886	0	373	0	0	5,5
887	0	374	0	0	9,5
888	0	375	0	0	14,5
889	0	375	2	0	13,7
890	0	375	6	0	26,2
891	0	376	0	0	9,7
892	0	376	0	0	11,6
893	0	377	0	1	8,6
894	0	377	1	1	7,5
895	0	377	2	1	39,5
896	0	377	5	1	57,5
897	0	377	6	1	88,6
898	0	377	7	1	77,6
899	0	377	8	1	56
900	0	377	9	1	40,2
901	0	378	0	1	11,2
902	0	378	2	1	18,6
903	0	378	3	1	26,1
904	0	378	6	1	129
905	0	378	7	1	275,9
906	0	378	8	1	365,6
907	0	378	9	1	342,3
908	0	378	10	1	189,6
909	0	379	0	0	1,9
910	0	380	0	0	7,2
911	0	381	2	0	6,4
912	0	382	2	1	7,6
913	0	383	4	0	17,2
914	0	384	1	1	12,1
915	0	384	2	1	45,6
916	0	384	5	1	29,4
917	0	384	6	1	23,6
918	0	384	7	1	8,6
919	0	384	8	1	16,4
920	0	384	8	1	16,9
921	0	385	1	1	13,6
922	0	386	0	0	4,4
923	0	386	1	0	2,8
924	0	387	4	0	3,1
925	0	388	1	0	7,1
926	0	389	2	0	6,7
927	0	389	6	0	6
928	0	390	2	0	16
929	0	390	6	0	16,7
930	0	390	10	0	16
931	0	391	0	1	65,2
932	0	392	2	1	8
933	0	392	5	1	12,2
934	0	393	5	0	4,3
935	0	394	2	0	2,4
936	0	395	2	0	3,4
937	0	396	2	0	5,5
938	0	397	2	0	2,7
939	0	397	5	0	4,5
940	0	398	6	0	37,7
941	0	399	2	0	15
942	0	400	0	0	7,9
943	0	400	1	0	10,1
944	0	400	4	0	10,5
945	0	401	4	1	17,5
946	0	401	5	1	12,2
947	0	401	6	1	19,8
948	0	401	7	1	16
949	0	401	8	1	12,4
950	0	402	3	0	11,2
951	0	403	2	0	8,9
952	0	404	2	0	5,1
953	0	405	2	1	1,6
954	0	405	5	1	8,2
955	0	405	5	1	8
956	0	405	6	1	4,8
957	0	406	0	1	5,4
958	0	406	2	1	10,6
959	0	406	3	1	10,1
960	0	406	4	1	9
961	0	407	2	0	3,8
962	0	407	6	0	322,2
963	0	407	7	0	72,7
964	0	407	9	0	72,2
965	0	407	13	0	50
966	0	408	0	0	4,7
967	0	408	3	0	10,2
968	0	409	2	0	8,3
969	0	409	5	0	12,6
970	0	410	0	0	5,6
971	0	410	2	0	9,8
972	0	411	0	0	6,2
973	0	412	2	1	8,8
974	0	412	5	1	21,8
975	0	412	6	1	23,9
976	0	413	0	1	9,8
977	0	413	3	1	29,2
978	0	413	4	1	35,1
979	0	413	5	1	40,3
980	0	413	6	1	56
981	0	413	7	1	37,1
982	0	414	1	0	1,6
983	0	415	1	0	7,8
984	0	416	0	0	3,6
985	0	416	1	0	1,1
986	0	417	0	0	5,8
987	0	417	1	0	4,5
988	0	417	2	0	5,1
989	0	417	4	0	3,9
990	0	417	7	0	3
991	0	417	9	0	4,3
992	0	418	13	0	8
993	0	418	14	0	4,5
994	0	418	17	0	5,7
995	0	418	18	0	5,5
996	0	418	19	0	18,2
997	0	418	21	0	13,8
998	0	418	24	0	31,6
999	0	418	26	0	17,1
1000	0	419	0	0	1,1
1001	0	419	2	0	5,9
1002	0	419	3	0	3,3
1003	0	420	0	1	11,7
1004	0	420	1	1	11,9
1005	0	421	0	1	5,4
1006	0	421	0	1	7,3
1007	0	422	0	1	26,7
1008	0	422	1	1	31,3
1009	0	422	2	1	13,3
1010	0	423	0	1	9,8
1011	0	423	2	1	17,2
1012	0	423	4	1	31,7
1013	0	424	0	0	5,6
1014	0	424	1	0	4,1
1015	0	424	5	0	8,2
1016	0	424	7	0	14,5
1017	0	425	12	1	66,1
1018	0	426	0	1	2
1019	0	427	0	1	13,3
1020	0	427	1	1	14,1
1021	0	428	0	0	1,4
1022	0	428	3	0	3,9
1023	0	428	4	0	5,7
1024	0	428	6	0	4,9
1025	0	429	0	1	1,2
1026	0	429	1	1	1,5
1027	0	429	2	1	1,9
1028	0	429	5	1	1,8
1029	0	429	8	1	7,2
1030	0	429	11	1	9,6
1031	0	430	1	1	5,6
1032	0	431	0	0	1,1
1033	0	432	0	0	13,6
1034	0	432	1	0	21,1
1035	0	432	3	0	5,4
1036	0	433	0	0	3,9
1037	0	433	1	0	2,9
1038	0	433	2	0	4,9
1039	0	434	0	0	63,6
1040	0	434	1	0	54,3
1041	0	434	3	0	70,8
1042	0	434	5	0	92,1
1043	0	434	7	0	61,6
1044	0	435	8	0	94,5
1045	0	435	11	0	17,1
1046	0	436	0	1	0,9
1047	0	437	0	1	7,7
1048	0	437	2	1	12,7
1049	0	438	0	0	2
1050	0	438	2	0	5,3
1051	0	438	4	0	5,9
1052	0	439	0	1	24,2
1053	0	439	2	1	18,7
1054	0	440	2	0	1,9
1055	0	441	0	0	15
1056	0	441	1	0	16
1057	0	441	3	0	10,8
1058	0	442	0	1	1,7
1059	0	442	1	1	1,7
1060	0	442	2	1	4,7
1061	0	442	3	1	13,4
1062	0	442	6	1	36
1063	0	443	0	1	9,5
1064	0	443	2	1	4,8
1065	0	443	4	1	9,7
1066	0	443	5	1	29,3
1067	0	444	0	1	4
1068	0	444	1	1	5,4
1069	0	445	0	0	2,1
1070	0	445	1	0	3,7
1071	0	445	6	0	8,4
1072	0	445	8	0	14,4
1073	0	445	10	0	9,9
1074	0	445	13	0	9,9
1075	0	446	2	1	1,1
1076	0	446	6	1	0,7
1077	0	446	8	1	1,7
1078	0	446	11	1	3,2
1079	0	446	18	1	3,5
1080	0	446	20	1	3,3
1081	0	447	1	0	8,3
1082	0	447	3	0	18,1
1083	0	447	6	0	8,8
1084	0	447	8	0	5,6
1085	0	447	10	0	3
1086	0	447	13	0	5,6
1087	0	448	0	0	4,2
1088	0	448	2	0	0,9
1089	0	449	0	0	6,2
1090	0	449	1	0	17,3
1091	0	449	4	0	60,3
1092	0	449	6	0	100
1093	0	449	8	0	51,1
1094	0	450	0	0	37,2
1095	0	450	2	0	23,9
1096	0	450	3	0	43,3
1097	0	450	5	0	50,5
1098	0	451	0	0	2,8
1099	0	452	0	1	19,2
1100	0	453	0	1	9,4
1101	0	453	4	1	19,1
1102	0	453	6	1	41
1103	0	453	8	1	86,4
1104	0	454	7	0	31,8
1105	0	454	10	0	8,6
1106	0	455	0	1	11,6
1107	0	455	2	1	17,8
1108	0	455	4	1	25,4
1109	0	456	0	0	5,5
1110	0	456	4	0	36,7
1111	0	457	1	0	4,5
1112	0	457	3	0	5,4
1113	0	457	5	0	6,5
1114	0	457	8	0	8,7
1115	0	457	10	0	6,4
1116	0	457	12	0	5,2
1117	0	458	0	0	3,5
1118	0	458	1	0	3
1119	0	459	0	1	13,8
1120	0	460	0	1	1,7
1121	0	460	2	1	1,3
1122	0	461	0	0	2,5
1123	0	461	3	0	2
1124	0	462	1	0	3,2
1125	0	463	0	1	2,9
1126	0	464	0	0	3,4
1127	0	464	1	0	3
1128	0	464	3	0	4,1
1129	0	465	0	0	11,6
1130	0	465	3	0	4,4
1131	0	466	0	0	15,9
1132	0	467	0	0	2,5
1133	0	468	0	1	34
1134	0	468	1	1	20,7
1135	0	469	0	0	6,2
1136	0	469	1	0	6,1
1137	0	470	0	0	0,8
1138	0	471	0	0	3,4
1139	0	471	1	0	2,9
1140	0	471	4	0	4,7
1141	0	472	0	1	4,2
1143	0	472	11	1	37,8
1144	0	472	13	1	37,5
1145	0	473	0	1	24,6
1146	0	473	1	1	10,6
1147	0	473	3	1	5,6
1148	0	474	3	0	4,7
1149	0	474	5	0	11
1150	0	475	0	1	3
1151	0	476	0	0	6
1152	0	476	1	0	5,5
1153	0	477	0	1	5,6
1154	0	477	4	1	13,7
1155	0	477	6	1	16,2
1156	0	477	8	1	26,7
1157	0	477	10	1	81,5
1158	0	478	0	0	1,1
1159	0	478	1	0	1
1160	0	478	4	0	2,1
1161	0	479	0	0	3,2
1162	0	479	2	0	2,7
1163	0	479	4	0	11,8
1164	0	479	7	0	35,4
1165	0	480	0	0	4,8
1166	0	480	1	0	5
1167	0	480	4	0	5,5
1168	0	480	6	0	10,7
1169	0	481	0	0	8,1
1170	0	482	0	0	6,9
1171	0	483	2	1	10
1172	0	484	0	0	2,8
1173	0	484	1	0	6,5
1174	0	485	0	0	8,3
1175	0	485	2	0	4,3
1176	0	485	5	0	9,4
1177	0	485	7	0	11
1178	0	485	9	0	9,1
1179	0	486	0	0	1,5
1180	0	486	3	0	2,1
1181	0	487	0	1	11,5
1182	0	487	1	1	12,5
1183	0	487	3	1	15,4
1184	0	487	5	1	85,7
1185	0	488	0	1	17,9
1186	0	488	2	1	25
1187	0	488	4	1	24,2
1188	0	488	7	1	19,2
1189	0	489	0	0	3,2
1190	0	489	4	0	9,3
1191	0	490	4	0	3,3
1192	0	490	7	0	4,9
1193	0	491	1	1	9,1
1194	0	491	2	1	5,9
1195	0	491	3	1	5,7
1196	0	491	6	1	6,5
1197	0	491	8	1	5,3
1198	0	491	10	1	3,6
1199	0	492	0	0	13,9
1200	0	492	1	0	4,6
1201	0	493	0	0	3,1
1202	0	493	1	0	0,6
1203	0	494	0	0	4
1204	0	494	2	0	6,4
1205	0	494	3	0	4,8
1206	0	495	0	1	38,9
1207	0	495	2	1	34
1208	0	495	4	1	55,9
1209	0	495	6	1	41
1210	0	495	6	1	41,3
1211	0	495	7	1	28
1212	0	496	0	1	7,4
1213	0	496	1	1	5,7
1214	0	497	9	1	5,7
1215	0	497	12	1	11,3
1216	0	498	0	0	12,2
1217	0	498	1	0	12,2
1218	0	498	3	0	27,1
1219	0	498	5	0	20,7
1220	0	499	0	0	4,4
1221	0	500	0	1	2,8
1222	0	500	1	1	2,2
1223	0	500	2	1	4,1
1224	0	500	4	1	7,7
1225	0	500	7	1	25,4
1226	0	500	9	1	30,8
1227	0	501	0	0	0,8
1228	0	501	4	0	0,8
1229	0	501	6	0	0,9
1230	0	501	8	0	3,7
1231	0	501	11	0	1,1
1232	0	502	0	0	1,5
1233	0	503	0	1	4,2
1234	0	503	1	1	2,2
1235	0	504	0	0	25,6
1236	0	504	13	0	14,5
1237	0	504	15	0	6,7
1238	0	504	18	0	10,9
1239	0	505	0	0	2,4
1240	0	506	0	1	5
1241	0	506	2	1	5,8
1242	0	507	0	0	4,2
1243	0	507	7	0	19,8
1244	0	508	0	0	11,5
1245	0	509	0	0	0,7
1246	0	510	0	0	13,3
1247	0	510	2	0	12,2
1248	0	510	4	0	4,3
1249	0	510	7	0	5,6
1250	0	511	0	1	7,4
1251	0	511	1	1	15,6
1252	0	512	0	0	43,1
1253	0	512	1	0	17,9
1254	0	512	3	0	16,2
1255	0	512	5	0	37,7
1256	0	512	8	0	23,4
1257	0	512	12	0	4,7
1258	0	513	0	1	6,2
1259	0	513	1	1	20,8
1260	0	513	3	1	10,8
1261	0	514	0	1	13,6
1262	0	514	1	1	17
1263	0	514	3	1	7,4
1264	0	514	7	1	12,6
1265	0	514	10	1	13,6
1266	0	514	11	1	7,6
1267	0	514	14	1	6,2
1268	0	514	16	1	16,7
1269	0	515	1	0	6,8
1270	0	515	4	0	9,2
1271	0	516	0	0	2,2
1272	0	516	1	0	3,5
1273	0	516	2	0	1,4
1274	0	516	4	0	2,7
1275	0	516	7	0	2,8
1276	0	517	0	0	0,9
1277	0	517	1	0	1,9
1278	0	517	3	0	2,8
1279	0	517	5	0	3,6
1280	0	517	9	0	7,2
1281	0	517	10	0
1282	0	518	0	1	9,3
1283	0	519	0	0	5,3
1284	0	519	4	0	29,4
1285	0	519	6	0	23,9
1286	0	519	8	0	6,1
1287	0	520	0	0	1,9
1288	0	520	3	0	1,6
1289	0	520	5	0	3,1
1290	0	520	8	0	3,8
1291	0	521	0	0	19,4
1292	0	522	0	0	3,8
1293	0	522	3	0	2,8
1294	0	523	0	0	0,8
1295	0	523	1	0	1,9
1296	0	524	0	1	4
1297	0	525	0	1	22,4
1298	0	525	1	1	20,7
1299	0	525	3	1	20,3
1300	0	526	0	0	2,7
1301	0	526	1	0	2,7
1302	0	527	0	0	1,2
1303	0	527	3	0	2,5
1304	0	527	4	0	3,2
1305	0	527	6	0	4
1306	0	527	8	0	6,5
1307	0	527	11	0	2,6
1308	0	528	0	1	6
1309	0	528	2	1	10,5
1310	0	529	0	0	5,6
1311	0	529	3	0	7,5
1312	0	529	6	0	8,9
1313	0	529	8	0	12,4
1314	0	529	13	0	2,7
1315	0	530	0	1	8,4
1316	0	530	2	1	7,3
1317	0	530	8	1	50
1318	0	531	0	0	3,9
1319	0	532	0	0	6,3
1320	0	533	0	0	1,6
1321	0	533	1	0	4,5
1322	0	533	4	0	5,7
1323	0	533	6	0	11,4
1324	0	534	0	1	4
1325	0	534	2	1	4,2
1326	0	534	4	1	4,8
1327	0	534	5	1	2,9
1328	0	534	7	1	6,7
1329	0	535	0	1	16,5
1330	0	536	0	0	6,4
1331	0	536	2	0	7,6
1332	0	537	0	0	5,7
1333	0	537	2	0	2,6
1334	0	537	4	0	3,6
1335	0	537	7	0	5,6
1336	0	538	0	0	2,9
1337	0	539	0	0	3,1
1338	0	539	1	0	6,1
1339	0	539	3	0	2,6
1340	0	539	5	0	6,3
1341	0	540	0	0	16,4
1342	0	540	2	0	19,1
1343	0	540	4	0	13,4
1344	0	540	5	0	15,1
1345	0	541	0	1	2,6
1346	0	541	1	1	5,8
1347	0	542	0	0	1,2
1348	0	542	4	0	3,9
1349	0	543	0	0	1,1
1350	0	544	0	0	0
1351	0	544	1	0	1
1352	0	544	3	0	1
1353	0	544	4	0	2,5
1354	0	544	6	0	1,9
1355	0	545	0	0	3,5
1356	0	545	2	0	10,4
1357	0	546	0	0	39,4
1358	0	547	0	1	9
1359	0	547	7	1	112
1360	0	547	7	1	114,1
1361	0	547	8	1	72,4
1362	0	547	9	1	46,2
1363	0	547	10	1	29,8
1364	0	547	11	1	14,8
1365	0	547	12	1	8,3
1366	0	547	13	1	5,8
1367	0	547	14	1	5,9
1368	0	547	15	1	6,9
1369	0	547	16	1	7,2
1370	0	548	0	1	247,5
1371	0	548	2	0	268,2
1372	0	549	0	0	4
1373	0	549	5	0	10,5
1374	0	549	9	0	5,6
1375	0	549	13	0	16,2
1376	0	549	15	0	44,7
1377	0	549	16	0	39,1
1378	0	549	19	0	251,4
1379	0	550	0	0	1,4
1380	0	551	0	0	2,5
1381	0	551	2	0
1382	0	551	6	0	10,6
1383	0	551	9	0	11,7
1384	0	552	0	0	0
1385	0	552	5	0	1
1386	0	552	7	0	2,6
1387	0	552	8	0	3,6
1388	0	553	0	0	1,4
1389	0	553	2	0	3,4
1390	0	554	0	1	14,5
1391	0	554	4	1	16,5
1392	0	554	5	1	9,1
1393	0	554	6	1	28
1394	0	554	7	1	25
1395	0	554	8	1	7,9
1396	0	554	9	1	7,3
1397	0	554	10	1	12,9
1398	0	554	11	1	13,7
1399	0	555	0	1	7,6
1400	0	555	3	1	39,6
1401	0	555	4	1	92,7
1402	0	555	5	1	114,1
1403	0	555	6	1	54,3
1404	0	555	7	1	41,7
1405	0	555	8	1	30,7
1406	0	555	9	1	27,2
1407	0	555	10	1	37,5
1408	0	555	11	1	35,2
1409	0	555	12	1	45,4
1410	0	556	0	1	9,1
1411	0	556	4	1	117,5
1412	0	556	5	1	151,6
1413	0	556	6	1	244
1414	0	556	7	1	192,6
1415	0	556	8	1	123,3
1416	0	556	9	1	157,9
1417	0	556	10	1	50,5
1418	0	556	11	1	70,8
1419	0	556	12	1	90,1
1420	0	556	13	1	51,4
1421	0	557	0	1	5,1
1422	0	557	2	1	5,8
1423	0	558	0	1	2,7
1424	0	558	0	1	7,8
1425	0	558	1	1	6,5
1426	0	558	2	1	3,8
1427	0	558	3	1	4
1428	0	558	4	1	1,7
1429	0	558	4	1	2,7
1430	0	558	5	1	3,9
1431	0	558	6	1	3,8
1432	0	558	7	1	2,6
1433	0	558	8	1
1434	0	559	0	1	1,9
1435	0	559	0	1	2,1
1436	0	559	2	1	5,1
1437	0	559	2	1	12,4
1438	0	559	3	1	16,2
1439	0	559	4	1	27,6
1440	0	559	5	1	85,3
1441	0	559	6	1	61,9
1442	0	559	7	1	55,7
1443	0	559	8	1	36,6
1444	0	559	9	1
1445	0	560	0	1	115,4
1446	0	560	1	1	70
1447	0	560	2	1	87
1448	0	560	3	1	191,7
1449	0	560	4	1	200
1450	0	560	5	1	334,4
1451	0	560	6	1	351,3
1452	0	560	7	1	291,4
1453	0	560	8	1	178,1
1454	0	560	9	1	167,9
1455	0	560	10	1	87,8
1456	0	561	0	0	11,9
1457	0	561	1	0	6,5
1458	0	561	2	0	5,2
1459	0	561	7	0	8,3
1460	0	562	0	0	7,1
1461	0	562	3	0	4,8
1462	0	563	0	0	2,5
1463	0	563	1	0	3,8
1464	0	563	2	0	2,6
1465	0	564	0	0	1,8
1466	0	564	5	0	12,7
1467	0	564	7	0	5,3
1468	0	565	0	0	3,3
1469	0	565	2	0	6
1470	0	565	4	0	2,5
1471	0	565	7	0	3,9
1472	0	566	0	1	3,3
1473	0	566	2	1	8,3
1474	0	566	4	1	222,9
1475	0	566	5	1	142,9
1476	0	566	5	1	38,8
1477	0	566	5	1	42,1
1478	0	566	6	1	52
1479	0	566	7	1	83,3
1480	0	566	10	1	101,4
1481	0	566	11	1	63,8
1482	0	567	0	1	37,2
1483	0	567	4	1	61
1484	0	567	5	1	83,1
1485	0	567	6	1	78
1486	0	567	7	1	72,1
1487	0	567	8	1	34,8
1488	0	567	9	1	36,8
1489	0	567	10	1	30,1
1490	0	567	11	1	34,4
1491	0	567	12	1	19,5
1492	0	567	13	1	19,2
1493	0	568	0	0
1494	0	568	1	0	4
1495	0	569	0	0	2
1496	0	569	1	0	0,7
1497	0	569	1	0	0,7
1498	0	570	0	0	4,2
1499	0	570	1	0	5,7
1500	0	570	3	0	4,7
1501	0	571	0	0	4,4
1502	0	571	1	0	4,3
1503	0	571	2	0	3
1504	0	571	3	0	8
1505	0	572	0	1	10,3
1506	0	572	1	1	8,5
1507	0	573	4	1	94,9
1508	0	574	2	0	3,1
1509	0	574	4	0	10
1510	0	574	6	0	17,9
1511	0	574	11	0	18,2
1512	0	574	13	0	5,7
1513	0	574	15	0	18,2
1514	0	574	17	0	21,6
1515	0	575	4	0	13,4
1516	0	576	13	0	1,5
1517	0	577	5	1	12,3
1518	0	577	7	1	100
1519	0	577	10	1	24,4
1520	0	578	4	0	6,8
1521	0	579	5	0	4,5
1522	0	579	9	0	4,9
1523	0	579	11	0	4,7
1524	0	579	13	0	10,1
1525	0	579	16	0	5,5
1526	0	580	0	1	1,5
1527	0	580	5	1	10
1528	0	581	2	1	2,7
1529	0	581	4	1	14,5
1530	0	581	7	1	15,6
1531	0	581	9	1	35,1
1532	0	581	11	1	27,5
1533	0	581	14	1	18,9
1534	0	582	1	1	3,4
1535	0	582	3	1	5,4
1536	0	582	4	1	2,4
1537	0	582	6	1	4
1538	0	582	8	1	14,3
1539	0	583	1	1	1,2
1540	0	583	2	1	5,9
1541	0	583	3	1	10,8
1542	0	583	5	1	12,2
1543	0	583	8	1	65,9
1544	0	583	10	1	75
1545	0	583	10	1	30,3
1546	0	583	12	1	28,3
1547	0	583	15	1	34,4
1548	0	584	1	0	1,1
1549	0	584	6	0	9,4
1550	0	584	9	0	8,7
1551	0	584	13	0	5,8
1552	0	585	1	0	3,4
1553	0	585	3	0	6
1554	0	585	5	0	10,5
1555	0	586	0	0	1,7
1556	0	586	2	0	2
1557	0	587	0	1	5,7
1558	0	587	2	1	10,3
1559	0	587	4	1	15,5
1560	0	587	5	1	22
1561	0	587	7	1	13
1562	0	587	9	1	12,5
1563	0	587	12	1	18,5
1564	0	588	1	0	30,9
1565	0	588	3	0	16,1
1566	0	589	1	0	1,2
1567	0	589	3	0	4
1568	0	590	1	0	2
1569	0	590	2	0	0,9
1570	0	590	5	0	4
1571	0	590	7	0	4,7
1572	0	591	0	0	3,8
1573	0	591	1	0	4,6
1574	0	591	2	0	5,9
1575	0	591	4	0	20,9
1576	0	592	0	0	1,9
1577	0	592	5	0	13,6
1578	0	592	7	0	8,6
1579	0	592	9	0	12,7
1580	0	592	11	0	23,6
1581	0	593	0	0	1,8
1582	0	593	3	0	1,8
1583	0	594	1	1	5,1
1584	0	594	2	1	6,6
1585	0	594	5	1	15,9
1586	0	594	5	1	10
1587	0	594	7	1	26,6
1588	0	594	9	1	8,5
1589	0	594	12	1	30,1
1590	0	595	0	0	1,6
1591	0	595	2	0	4
1592	0	596	0	0	38,8
1593	0	596	8	0	113,2
1594	0	596	9	0	51,6
1595	0	597	0	1	8,1
1596	0	597	2	1	14,9
1597	0	598	0	0	2,3
1598	0	598	2	0	3,8
1599	0	599	0	0	6,4
1600	0	599	1	0	11,8
1601	0	599	2	0	13,4
1602	0	599	4	0	9
1603	0	599	6	0	4,2
1604	0	599	8	0	2,2
1605	0	599	9	0	3,8
1606	0	599	11	0	2,1
1607	0	600	0	0	7,3
1608	0	600	1	0	5,4
1609	0	600	3	0	9,2
1610	0	601	0	0	2,1
1611	0	601	2	0	8,5
1612	0	601	4	0	2,5
1613	0	602	1	0	9,9
1614	0	602	3	0	14
1615	0	602	4	0	19,2
1616	0	602	6	0	46,7
1617	0	602	8	0	46,3
1618	0	602	10	0	27,2
1619	0	603	2	1	2,4
1620	0	603	4	1	6,3
1621	0	603	6	1	27,7
1622	0	603	7	1	49,3
1623	0	603	8	1	64,6
1624	0	603	9	1	69,9
1625	0	603	10	1	100
1626	0	603	11	1	103
1627	0	604	0	1	6,4
1628	0	604	3	1	3,6
1629	0	604	5	1	7,2
1630	0	604	7	1	5,6
1631	0	605	1	1
1632	0	605	4	1	2,3
1633	0	605	7	1	8,1
1634	0	605	9	1	15
1635	0	606	1	0	6,5
1636	0	606	2	0	11,6
1637	0	607	0	0	4,9
1638	0	607	1	0	3,5
1639	0	607	2	0	3,1
1640	0	607	4	0	6,8
1641	0	607	6	0	12,7
1642	0	607	8	0	18,1
1643	0	608	0	1	2
1644	0	608	2	1	14,8
1645	0	608	4	1	44
1646	0	609	0	1	21,4
1647	0	609	1	1	20,9
1648	0	609	3	1	57,1
1649	0	609	5	1	141,9
1650	0	609	5	1	110
1651	0	610	0	1	3,5
1652	0	610	2	1	5,2
1653	0	610	4	1	29,1
1654	0	610	5	1	24,6
1655	0	610	7	1	44
1656	0	610	10	1	63
1657	0	611	0	0	2,2
1658	0	611	2	0	3,4
1659	0	612	0	0	4,6
1660	0	612	2	0	14,3
1661	0	612	4	0	15
1662	0	613	0	1	7,1
1663	0	613	1	1	30
1664	0	613	6	1	50
1665	0	613	9	1	40
1666	0	614	0	0	43,1
1667	0	614	8	0	7,7
1668	0	614	10	0	3
1669	0	614	12	0	7,2
1670	0	614	14	0	10,1
1671	0	614	16	0	10,9
1672	0	614	18	0	19,2
1673	0	615	1	0	16,7
1674	0	615	2	0	42,4
1675	0	615	4	0	36,8
1676	0	616	1	1	4,4
1677	0	616	3	1	3,1
1678	0	616	4	1	4,3
1679	0	616	6	1	11,5
1680	0	617	0	1	6,5
1681	0	617	1	1	2,3
1682	0	617	3	1	7,4
1683	0	617	5	1	14,1
1684	0	618	2	0	11,2
1685	0	618	4	0	7,8
1686	0	618	6	0	7,3
1687	0	618	8	0	4
1688	0	619	2	0	6,2
1689	0	619	4	0	9,8
1690	0	620	3	1	44
1691	0	620	3	1	50
1692	0	620	5	1	35,9
1693	0	620	8	1	44
1694	0	621	2	1	15,6
1695	0	622	0	0	14,1
1696	0	622	5	0	44,8
1697	0	623	0	0	3,9
1698	0	623	2	0	3,2
1699	0	623	4	0	1,3
1700	0	623	6	0	3,4
1701	0	624	0	1	18,6
1702	0	624	1	1	10,6
1703	0	624	3	1	8
1704	0	625	0	1	20,5
1705	0	625	2	1	76,9
1706	0	625	3	1	63,6
1707	0	625	4	1	183,3
1708	0	625	7	1	139,5
1710	0	627	0	0	4,7
1711	0	627	1	0
1712	0	627	3	0	0
1713	0	627	5	0	8,7
1714	0	628	0	0	8,5
1715	0	628	1	0	4,5
1716	0	628	3	0	8,4
1717	0	629	0	0	1,4
1718	0	629	1	0	4,8
1719	0	629	5	0	4,1
1720	0	630	0	0	12,2
1721	0	630	1	0	19,4
1722	0	630	3	0	5,9
1723	0	631	0	0	0,6
1724	0	631	2	0	3,5
1725	0	631	4	0	3,1
1726	0	631	6	0	5,8
1727	0	632	0	0	1,3
1728	0	632	2	0	2,8
1729	0	632	4	0	9,1
1730	0	632	6	0	15,7
1731	0	633	0	0	2,7
1732	0	633	3	0	3,2
1733	0	633	5	0	2,9
1734	0	633	7	0	5,1
1735	0	634	0	1	1,6
1736	0	634	2	1	6,7
1737	0	634	5	1	14,5
1738	0	634	8	1	23,8
1739	0	635	0	0	2,3
1740	0	635	5	0	9,1
1741	0	635	6	0	13,2
1742	0	636	0	0	14
1743	0	636	1	0	6,6
1744	0	636	3	0	10
1745	0	636	5	0	8,6
1746	0	637	0	0	2,2
1747	0	637	2	0	1,7
1748	0	637	4	0	1,8
1749	0	638	0	0	3,1
1750	0	638	2	0	8,3
1751	0	639	0	0	1,4
1752	0	639	1	0	4,8
1753	0	639	3	0	3,3
1754	0	640	0	1	2,7
1755	0	640	2	1	5,3
1756	0	640	6	1	22,4
1757	0	640	8	1	28,7
1758	0	641	0	1	18,8
1759	0	641	1	1	22
1760	0	642	0	0	0,9
1761	0	642	5	0	1,4
1762	0	642	7	0	0,9
1763	0	643	0	0	7,3
1764	0	643	1	0	7,6
1765	0	643	3	0	22,9
1766	0	643	5	0	37
1767	0	643	7	0	87,2
1768	0	644	0	0	2,3
1769	0	644	1	0	1,6
1770	0	645	0	0	1,4
1771	0	645	9	0	7,4
1772	0	645	13	0	12,1
1773	0	646	0	1	15,3
1774	0	646	2	1	34,2
1775	0	646	6	1	116
1776	0	647	0	1	3,5
1777	0	647	2	1	16,7
1778	0	648	0	0	1,3
1779	0	649	0	0	2,3
1780	0	649	1	0	6,9
1781	0	649	3	0	2,7
1782	0	649	6	0	11,8
1783	0	650	2	1	7,4
1784	0	651	10	0	0,8
1785	0	651	13	0	2
1786	0	651	16	0	5,9
1787	0	652	0	0	1,4
1788	0	652	2	0	1,9
1789	0	652	3	0	10,4
1790	0	652	5	0	10,3
1791	0	653	0	1	8,3
1792	0	653	2	1	10,4
1793	0	653	5	1	25
1794	0	654	0	0	9,3
1795	0	654	2	0	1,5
1796	0	655	0	0	1,6
1797	0	655	2	0	2,1
1798	0	656	0	0	1,1
1799	0	656	2	0	2,3
1800	0	656	3	0	1,1
1801	0	657	0	0	2,3
1802	0	657	2	0	5,8
1803	0	658	0	0	0,9
1804	0	658	1	0	1,9
1805	0	658	3	0	12,2
1806	0	658	5	0	19
1807	0	659	0	1	3,4
1808	0	659	4	1	4,4
1809	0	660	0	0	9,8
1810	0	660	2	0	6,2
1811	0	661	0	0	2,8
1812	0	661	2	0	4,2
1813	0	662	0	0	2,2
1814	0	662	1	0	0
1815	0	662	3	0	1,8
1816	0	663	0	1	8,7
1817	0	663	2	1	13
1818	0	663	4	1	15,5
1819	0	664	0	0	0,9
1820	0	664	2	0	4,1
1821	0	665	0	0	3,2
1822	0	665	1	0	11,1
1823	0	665	2	0	4,5
1824	0	665	4	0	10,8
1825	0	665	5	0	7,2
1826	0	666	0	1	17,6
1827	0	666	2	1	46,5
1828	0	666	4	1
1829	0	666	6	1	34
1830	0	667	0	0	18,2
1831	0	668	5	1	4,7
1832	0	669	4	0	59,7
1833	0	670	0	0	3,1
1834	0	670	3	0	7,5
1835	0	671	0	0	3,5
1836	0	672	0	1	2,4
1837	0	672	1	1	8
1838	0	672	3	1	10,9
1839	0	673	0	0	1,8
1840	0	673	3	0	3,4
1841	0	674	0	1	17,9
1842	0	674	3	1	16,2
1843	0	675	0	0	13,8
1844	0	676	0	1	1,9
1845	0	676	1	1	2,8
1846	0	676	3	1	2,4
1847	0	677	0	1	2
1848	0	677	2	1	2,6
1849	0	677	4	1	3,4
1850	0	678	0	1	5,9
1851	0	678	1	1	15,5
1852	0	678	3	1	7,4
1853	0	679	0	0	1,5
1854	0	679	2	0	3,4
1855	0	680	0	0	54,5
1856	0	680	2	0	23,2
1857	0	681	0	0	1,1
1858	0	681	2	0	1,5
1859	0	682	0	0	22,4
1860	0	682	1	0	33,3
1861	0	682	3	0	20,4
1862	0	683	0	0	1,2
1863	0	683	5	0	2,4
1864	0	683	6	0	1,7
1865	0	683	7	0	2,6
1866	0	684	0	0	14,3
1867	0	684	3	0	16,3
1868	0	685	0	1	6,8
1869	0	685	1	1	8,8
1870	0	685	3	1	12,1
1871	0	686	0	1	3,8
1872	0	686	1	1	4,9
1873	0	686	2	1	14,1
1874	0	686	4	1	31,8
1875	0	687	0	1	8,9
1876	0	687	3	1	16,4
1877	0	688	0	0	3,1
1878	0	688	1	0	2,5
1879	0	689	1	0	4
1880	0	689	3	0	3,9
1881	0	690	0	1	5,1
1882	0	690	2	1	13,1
1883	0	691	1	0	0,6
1884	0	691	2	0	3
1885	0	692	0	0	1,5
1886	0	692	2	0	2,4
1887	0	693	0	1	0,9
1888	0	693	3	1	13,9
1889	0	694	0	0	3,2
1890	0	694	1	0	5
1891	0	694	3	0	2,6
1892	0	695	3	1	262,5
1893	0	695	4	1	231
1894	0	695	5	1	217,6
1895	0	695	6	1	184,3
1896	0	695	7	1	185,7
1897	0	696	3	1	69,8
1898	0	696	3	1	50,6
1899	0	696	3	1	38,1
1900	0	696	3	1	76,1
1901	0	696	20	1	20
1902	0	696	21	1	27,1
1903	0	696	22	1	17,4
1904	0	696	23	1	10,1
1905	0	696	24	1	6,8
1906	0	697	2	0
1907	0	697	3	0
1908	0	698	20	1	17,4
1909	0	698	21	1	9,3
1910	0	698	22	1	10,2
1911	0	698	23	1	8,2
1912	0	698	24	1	5
1913	0	698	25	1	5,1
1914	0	698	26	1	5,4
1916	0	700	0	0	8,6
1928	0	703	2	1	40,6
1929	0	703	3	1	69,1
1930	0	703	4	1	107,6
1931	0	703	5	1	118
1932	0	703	6	1	95,4
1933	0	703	7	1	86,5
1934	0	703	8	1	71,4
1935	0	704	2	1	13,5
1936	0	704	3	1	32,2
1937	0	704	4	1	15,8
1938	0	704	5	1	12,7
1939	0	704	6	1	11,1
1940	0	704	7	1	24,9
1941	0	704	8	1	31
1942	0	705	1	1	22,8
1943	0	705	3	1	41,8
1944	0	705	4	1	51,6
1945	0	705	5	1	35,3
1946	0	705	6	1	32,2
1947	0	706	5	0
1948	0	707	3	0	1,3
1949	0	707	5	0
1950	0	708	0	0	6,1
1951	0	709	0	1	9,1
1952	0	709	1	1	9,1
1953	0	709	2	1	11,1
1954	0	709	3	1	43,1
1955	0	709	4	1	47,5
1956	0	710	1	1	8,3
1957	0	710	1	1	23,5
1958	0	710	2	1	50,8
1959	0	710	4	1	72,7
1960	0	711	3	1	8,1
1961	0	711	3	1	11
1962	0	711	4	1	12,9
1963	0	712	0	1	19,9
1964	0	712	1	1	20,5
1965	0	712	2	1	12,9
1966	0	712	3	1	12,9
1967	0	712	4	1	20,4
1968	0	713	0	0	1,9
1969	0	714	3	0	2,2
1970	0	715	1	0	19,1
1971	0	716	3	0	3,5
1972	0	717	0	1	10,1
1973	0	717	0	1	31,7
1974	0	717	1	1	30
1975	0	717	2	1	17,2
1976	0	718	0	1	60,5
1977	0	718	1	1	103,3
1978	0	718	2	1	96,1
1979	0	719	0	0	7,2
1980	0	720	0	0	6,7
1981	0	721	0	1	42,2
1982	0	721	1	1	41,7
1983	0	722	0	0	4,8
1984	0	723	0	1	31,9
1985	0	723	1	1	68,8
1986	0	724	1	1	6,8
1987	0	724	1	1	6,4
1988	0	725	0	1	4,4
1989	0	726	0	1	7
1991	0	728	0	0	1,1
1992	0	729	0	1	2,9
1993	0	729	0	1	6,1
1994	0	730	0	1	16
1995	0	730	1	1	5,1
1996	0	730	2	1	7,6
1997	0	730	3	1	8,7
1998	0	730	4	1	21,9
1999	0	731	1	0	0,9
2000	0	732	0	0	2,4
2001	0	733	0	1	8,3
2002	0	734	0	0	9
2003	0	735	4	1	23,2
2004	0	735	4	1	19
2005	0	735	5	1	16,2
2006	0	735	6	1	24,7
2007	0	735	7	1	21,9
2008	0	735	8	1	24,1
2009	0	735	9	1	15,7
2010	0	736	0	0	0,8
2011	0	737	0	1	6,9
2012	0	737	1	1	7
2013	0	737	2	1	22,9
2014	0	738	0	0	0
2015	0	739	2	1
2016	0	739	4	1
2017	0	740	1	0	3,4
2018	0	740	2	0	2,8
[truncated: 589 more rows]
