# Supplementary material for: A novel haemocytometric COVID-19 prognostic score developed and validated in an observational multicentre European hospital-based study
Source: eLife journal article supplement (doi:10.7554/elife.63195), 2020-11-26
Supplement: supp [file elife-63195-supp-v1.zip › elife_poa_e63195_Figure_5_source_data_1.csv]

Figure 5 – source data file 1. Source data for trends of absolute monocyte count over 14 days of hospitalisation in critical/fatal (CF) and non-critical (NC) patients
Filename	exclusion	Pat_ID	length_of_hospitalisation	Critical_or_Fatal	MONO#(10^3/uL)
1	0	1	0	1	0,56
2	0	1	2	1	0,34
3	0	1	2	1	0,31
4	0	1	3	1	0,26
5	0	1	4	1	0,26
6	0	1	15	1	0,66
7	0	2	0	0	0,78
8	0	2	1	0	0,83
9	0	2	2	0	1,1
10	0	2	3	0	1,24
11	0	2	4	0	1,34
12	0	2	6	0	1,27
13	0	3	0	1	0,3
14	0	3	1	1	0,18
15	0	3	1	1	0,08
16	0	3	2	1	0,1
17	0	3	3	1	0,06
18	0	3	4	1	0,1
19	0	3	4	1	0,13
20	0	3	5	1	0,18
21	0	3	6	1	0,24
22	0	3	7	1	0,19
23	0	3	8	1	0,24
24	0	3	9	1	0,45
25	0	3	10	1	0,48
26	0	3	11	1	0,58
27	0	3	12	1	0,9
28	0	3	13	1	1,11
29	0	4	0	1	0,2
30	0	4	1	1	0,22
31	0	4	1	1	0,16
32	0	4	2	1	0,17
33	0	4	3	1	0,1
34	0	4	4	1	0,27
35	0	4	5	1	0,27
36	0	4	6	1	0,16
37	0	4	7	1	0,29
38	0	4	8	1	0,29
39	0	4	9	1	0,51
40	0	4	10	1	0,65
41	0	4	10	1	0,64
42	0	4	11	1	1,1
43	0	4	12	1	0,35
44	0	4	13	1	0,59
45	0	4	14	1	0,75
46	0	5	0	0	0,9
47	0	5	1	0	0,67
48	0	6	0	0	0,38
49	0	6	2	0	0,39
50	0	6	3	0	0,46
51	0	6	5	0	0,56
52	0	7	0	0	0,3
53	0	7	2	0	0,34
54	0	7	3	0	0,27
55	0	7	4	0	0,3
56	0	7	5	0	0,35
57	0	7	6	0	0,41
58	0	8	1	0	0,28
59	0	9	0	0	1,09
60	0	9	2	0
61	0	9	3	0	0,87
62	0	9	4	0	0,89
63	0	9	5	0	0,79
64	0	9	7	0	1,01
65	0	10	0	1	0,29
66	0	10	1	1	0,3
67	0	10	3	1	0,33
68	0	10	4	1	0,18
69	0	11	0	0	0,59
70	0	11	1	0	0,53
71	0	11	3	0	0,49
72	0	12	0	1	0,26
73	0	12	2	1	0,43
74	0	13	5	1	0,52
75	0	13	6	1	0,54
76	0	13	7	1	0,58
77	0	13	8	1	0,76
78	0	13	9	1	0,55
79	0	13	9	1	0,8
80	0	13	10	1	0,75
81	0	13	11	1	1,09
82	0	13	12	1	1,29
83	0	13	13	1	1,2
84	0	14	1	0	1,87
85	0	15	13	1	1,69
86	0	15	14	1	1,95
87	0	15	15	1	1,71
88	0	15	16	1	1,79
89	0	15	17	1	1,62
90	0	15	18	1	1,38
91	0	15	19	1	1,38
92	0	15	20	1	1,24
93	0	16	11	1	1,58
94	0	16	12	1	1,54
95	0	16	13	1	1,42
96	0	16	14	1	1,7
97	0	16	15	1	1,97
98	0	16	16	1	1,92
99	0	16	17	1	1,88
100	0	16	18	1	1,15
101	0	16	19	1	1,03
102	0	17	1	0
103	0	17	2	0	0,51
104	0	17	4	0	0,49
105	0	18	0	1	0,31
106	0	18	2	1	0,24
107	0	18	2	1	0,12
108	0	18	3	1	0,26
109	0	18	4	1	0,25
110	0	19	0	1	0,43
111	0	19	1	1	0,48
112	0	19	3	1	0,73
113	0	20	0	0	0,22
114	0	20	1	0	0,25
115	0	20	3	0	0,32
116	0	21	0	1	0,28
117	0	22	0	0	0,62
118	0	23	0	0	0,27
119	0	24	0	0	0,25
120	0	25	0	1	0,14
121	0	26	0	0	0,51
122	0	27	0	0	1,79
123	0	28	0	0	0,83
124	0	29	0	0	0,18
125	0	30	0	1
126	0	30	4	1	0,5
127	0	31	0	0	0,18
128	0	32	0	1	0,26
129	0	33	0	1	0,43
130	0	34	0	1
131	0	35	0	0	0,44
132	0	36	0	1	0,36
133	0	37	0	0	0,68
134	0	38	0	1	0,23
135	0	39	0	0	0,76
136	0	40	0	0	0,75
137	0	41	0	0	0,92
138	0	42	0	0	0,47
139	0	43	0	0	0,54
140	0	44	0	0	0,59
141	0	45	0	1	0,77
142	0	45	1	1
143	0	45	1	1
144	0	45	2	1	0,26
145	0	45	3	1
146	0	45	4	1	0,64
147	0	45	5	1	0,82
148	0	45	5	1
149	0	45	6	1	0,84
150	0	45	6	1
151	0	45	7	1	0,83
152	0	45	7	1
153	0	45	8	1	1
154	0	45	9	1	1,07
155	0	45	10	1	1,1
156	0	45	11	1	1,01
157	0	45	12	1	0,85
158	0	45	13	1	0,74
159	0	45	14	1	0,83
160	0	45	15	1	0,75
161	0	45	16	1	0,67
162	0	45	17	1	0,72
163	0	45	18	1	0,71
164	0	45	19	1	0,78
165	0	45	20	1	0,97
166	0	45	21	1	0,76
167	0	45	22	1	0,75
168	0	46	0	0	0,87
169	0	47	0	0	0,43
170	0	48	0	1	0,39
171	0	49	0	1
172	0	50	0	0	0,7
173	0	51	0	0	0,33
174	0	52	0	1	0,6
175	0	53	0	1	0,59
176	0	54	0	1	0,55
177	0	54	4	1	0,43
178	0	54	10	1	0,52
179	0	54	11	1	0,82
180	0	55	0	0	0,79
181	0	56	0	1	0,43
182	0	57	0	0	0,53
183	0	58	0	0	0,3
184	0	59	0	0	0,3
185	0	60	0	0	0,29
186	0	61	0	0	0,4
187	0	62	0	1	0,46
188	0	63	0	0	0,32
189	0	64	0	0	0,37
190	0	65	0	0
191	0	66	0	1	1,19
192	0	67	0	0
193	0	68	0	0	0,18
194	0	69	0	0	0,42
195	0	70	0	0	0,12
196	0	71	0	0	0,56
197	0	72	0	0	0,54
198	0	73	0	0	0,42
199	0	74	0	0	0,56
200	0	75	0	0	0,19
201	0	76	0	0
202	0	77	0	0	0,41
203	0	78	0	1	0,33
204	0	79	0	0	0,61
205	0	79	0	0
206	0	79	1	0
207	0	79	2	0
208	0	79	3	0	0,43
209	0	79	5	0	0,41
210	0	79	7	0
211	0	79	8	0	0,39
212	0	79	9	0
213	0	79	10	0	0,42
214	0	79	12	0	0,58
215	0	80	0	0	0,51
216	0	81	0	1	0,33
217	0	82	0	0	0,6
218	0	83	0	0	0,48
220	0	85	0	1	0,19
221	0	86	0	1	0,29
222	0	87	0	0	0,39
223	0	88	0	0	0,4
225	0	90	0	0	0,24
226	0	91	0	0	0,57
227	0	92	0	0	0,39
228	0	93	0	1	0,29
229	0	93	1	1
230	0	93	2	1	0,43
231	0	94	0	0	0,49
232	0	95	0	0	0,49
233	0	96	0	1	0,43
234	0	97	0	0	0,28
235	0	98	0	0	0,28
236	0	98	2	0	0,24
237	0	98	4	0
238	0	98	5	0
239	0	98	13	0	0,54
240	0	99	0	1	0,59
241	0	99	1	1	0,53
242	0	99	2	1
243	0	99	3	1
244	0	99	4	1
245	0	99	5	1
246	0	100	0	1	0,54
247	0	101	0	1	0,35
248	0	102	0	0	0,12
249	0	103	0	1	0,11
250	0	103	1	1	0,14
251	0	104	0	1	0,23
252	0	105	0	0	0,29
253	0	106	0	1	0,29
254	0	107	0	0	0,62
255	0	108	0	0	0,41
256	0	109	0	1	0,41
257	0	110	0	0	0,23
258	0	110	1	0
259	0	110	2	0
260	0	110	3	0
261	0	110	4	0
262	0	110	5	0
263	0	110	6	0
264	0	110	7	0
265	0	110	7	0
266	0	110	8	0	0,34
267	0	110	9	0	0,36
268	0	110	10	0	0,32
269	0	110	11	0	0,26
270	0	110	12	0	0,39
271	0	110	13	0	0,39
272	0	110	16	0	0,42
273	0	110	17	0	0,33
274	0	110	20	0	0,34
275	0	111	0	0	0,13
276	0	112	0	0	0,28
277	0	113	0	0	0,34
278	0	114	0	1	0,46
279	0	115	0	1	0,54
280	0	116	0	1	0,61
281	0	117	0	0	0,89
282	0	118	0	1	0,1
283	0	119	0	1	1,21
284	0	120	0	1	0,18
285	0	121	0	1	0,62
286	0	122	0	0	0,65
287	0	122	4	0
288	0	122	7	0
289	0	122	9	0
290	0	123	0	1	0,46
291	0	124	0	0	0,5
292	0	125	0	0	0,76
293	0	126	0	1	0,36
294	0	126	2	1	0,36
295	0	127	0	0	0,59
296	0	127	4	0	0,59
297	0	128	0	1	0,43
298	0	129	0	0	0,46
299	0	130	0	1	0,37
300	0	131	0	1	0,23
301	0	132	0	1	0,82
302	0	133	0	1	0,57
303	0	134	0	1	0,26
304	0	134	2	1	0,25
305	0	134	3	1	0,23
306	0	135	0	0	0,28
307	0	136	0	0	0,17
308	0	136	5	0	0,21
309	0	136	7	0	0,24
310	0	136	8	0
311	0	136	9	0	0,34
312	0	136	10	0	0,46
313	0	136	11	0	0,53
314	0	136	12	0	0,54
315	0	136	13	0	0,74
316	0	136	14	0	0,72
317	0	137	0	1	0,36
318	0	137	1	1	0,27
319	0	137	2	1
320	0	137	4	1	0,21
321	0	138	0	0	0,38
322	0	139	0	0	0,13
323	0	140	0	0	0,39
324	0	140	2	0	0,25
325	0	140	6	0	0,54
326	0	141	0	0	0,7
327	0	142	0	1	0,36
328	0	143	0	1	0,67
329	0	144	0	0	0,56
330	0	145	0	0	0,33
331	0	146	0	0	0,37
332	0	147	0	1	0,3
333	0	148	0	1	0,16
334	0	149	0	0	0,27
335	0	150	0	1	0,2
336	0	151	0	1	0,35
337	0	152	0	0	0,46
338	0	153	0	0	0,72
339	0	154	0	0	0,46
340	0	155	0	0	0,45
341	0	156	0	0	0,47
342	0	157	0	1	0,58
343	0	158	0	0	0,53
344	0	159	0	0	0,27
345	0	160	0	0	0,6
346	0	161	0	1	0,41
347	0	162	0	1	0,31
348	0	163	0	0	0,22
349	0	164	0	1	0,2
350	0	165	0	1	0,42
351	0	166	0	1	0,43
352	0	167	0	0	0,28
353	0	168	0	0	0,22
355	0	170	0	0	0,52
356	0	171	0	0	1,02
357	0	172	0	0	0,96
358	0	173	0	1	0,25
359	0	174	0	0	0,88
360	0	175	0	1	0,3
361	0	176	0	0	0,42
362	0	177	0	0	0,15
363	0	178	0	1	0,48
364	0	179	0	0	0,48
365	0	179	2	0
366	0	179	3	0
367	0	179	5	0	0,49
368	0	179	6	0
369	0	179	6	0
370	0	179	7	0
371	0	179	8	0
372	0	179	9	0	0,74
373	0	179	10	0	0,98
374	0	179	11	0
375	0	179	12	0	1,86
376	0	179	13	0
377	0	179	14	0	1,61
378	0	179	15	0
379	0	179	16	0	1,64
380	0	180	0	1	0,51
381	0	181	0	0	0,56
382	0	182	0	0	1,05
383	0	183	0	0	0,58
384	0	184	0	0	0,38
385	0	185	0	0	0,34
386	0	186	0	1	0,25
387	0	187	0	0	0,3
388	0	188	0	1	0,23
389	0	189	0	1	0,18
390	0	189	2	1
391	0	189	4	1	0,25
392	0	190	0	0	0,73
393	0	191	0	0	0,51
394	0	192	0	0	0,34
395	0	193	0	0	0,56
396	0	194	0	1	0,35
397	0	195	0	0	0,8
398	0	196	0	1	0,9
399	0	197	0	0	0,41
400	0	198	0	0	1,68
401	0	199	0	1	0,34
402	0	200	0	1	0,33
403	0	201	0	1	1,09
404	0	202	0	1	0,71
405	0	203	0	1	0,47
406	0	204	0	0	0,51
407	0	205	0	0	0,47
408	0	206	0	0	0,28
409	0	207	0	0	0,28
410	0	208	0	1	0,17
411	0	209	0	0	0,39
412	0	210	0	1	0,15
413	0	211	0	0	0,47
414	0	212	0	1	1,67
415	0	213	0	1	0,45
416	0	214	0	1	0,51
417	0	215	0	1	0,66
418	0	216	0	0	0,2
419	0	216	2	0	0,24
420	0	216	3	0
421	0	216	4	0	0,34
422	0	216	6	0
423	0	216	7	0
424	0	216	9	0	0,51
425	0	217	0	1	0,6
426	0	217	3	1	0,28
427	0	217	5	1	0,29
428	0	217	7	1
429	0	218	0	0	0,47
430	0	219	0	0	0,27
431	0	220	0	1	0,53
432	0	221	0	0	0,19
433	0	222	0	0	0,37
434	0	223	0	1	0,7
435	0	224	0	1	0,5
436	0	225	0	1	0,45
437	0	226	0	0	0,59
438	0	227	0	0	0,73
439	0	228	0	0	0,3
440	0	229	0	0	0,47
441	0	230	0	0	0,35
442	0	231	0	1	0,2
443	0	232	0	0	0,61
444	0	233	0	0	0,57
445	0	234	0	0	0,54
446	0	235	0	0	0,4
447	0	236	0	0	0,28
448	0	237	1	1	0,3
449	0	237	1	1	0,38
450	0	237	1	1	0,3
451	0	237	2	1	0,11
452	0	237	3	1	0,09
453	0	237	4	1	0,06
454	0	237	5	1	0,09
455	0	238	11	1	0,75
456	0	238	12	1	0,48
457	0	238	13	1	1,06
458	0	238	14	1	1,01
459	0	238	15	1	0,93
460	0	238	16	1	1,06
461	0	239	0	0	0,35
462	0	240	1	0	0,25
463	0	240	3	0	0,26
464	0	240	4	0	0,33
465	0	241	0	1	0,35
466	0	241	0	1	0,2
467	0	241	1	1	0,34
468	0	241	2	1	0,31
469	0	241	2	1	0,37
470	0	241	3	1	0,37
471	0	241	4	1	0,43
472	0	241	5	1	0,5
473	0	241	5	1	0,42
474	0	241	6	1	0,61
475	0	242	0	1	0,28
476	0	242	1	1	0,27
477	0	242	1	1	0,5
478	0	242	1	1	0,38
479	0	242	2	1	0,23
480	0	242	2	1	0,23
481	0	243	8	1	0,98
482	0	243	9	1	0,7
483	0	243	9	1	0,66
484	0	243	10	1	0,65
485	0	243	11	1	0,72
486	0	244	2	0	0,68
487	0	244	6	0	0,67
488	0	245	2	1	0,76
489	0	246	0	0	0,38
490	0	246	2	0	0,37
491	0	247	2	0	0,51
492	0	247	4	0	0,72
493	0	247	5	0	0,7
494	0	247	6	0	0,77
495	0	248	1	0	0,22
496	0	248	2	0	0,21
497	0	248	3	0	0,27
498	0	248	4	0	0,31
499	0	249	2	1	0,33
500	0	249	3	1	0,1
501	0	249	3	1	0,14
502	0	249	4	1	0,09
503	0	249	4	1	0,11
504	0	249	4	1	0,15
505	0	249	5	1	0,25
506	0	249	6	1	0,24
507	0	249	7	1	0,52
508	0	250	2	0	0,71
509	0	250	5	0	0,75
510	0	250	6	0	0,98
511	0	251	2	0	1,09
512	0	251	3	0	0,99
513	0	251	5	0	0,74
514	0	252	7	1	0,94
515	0	252	8	1	0,87
516	0	252	9	1	1,08
517	0	252	10	1	1,04
518	0	252	11	1	1,44
519	0	252	12	1	1,4
520	0	253	6	1	0,24
521	0	253	7	1	0,24
522	0	253	7	1	0,23
523	0	253	7	1	0,1
524	0	253	7	1	0,2
525	0	253	8	1	0,34
526	0	253	9	1	0,4
527	0	254	6	1	1,41
528	0	255	6	0	0,49
529	0	255	7	0	0,7
530	0	255	8	0	0,62
531	0	255	9	0	0,56
532	0	255	10	0	0,63
533	0	256	1	0	0,15
534	0	256	2	0	0,15
535	0	257	1	1	0,53
536	0	257	3	1	0,75
537	0	257	4	1	0,71
538	0	257	5	1	0,72
539	0	258	2	0	0,67
540	0	258	3	0	0,73
541	0	259	7	0	0,46
542	0	259	8	0	0,42
543	0	260	0	1	0,75
544	0	260	2	1	0,85
545	0	260	4	1	0,39
546	0	260	5	1	0,5
547	0	260	6	1	0,56
548	0	261	6	1	0,38
549	0	261	7	1	0,5
550	0	261	8	1	0,62
551	0	261	9	1	0,65
552	0	261	11	1	0,65
553	0	261	12	1	0,63
554	0	261	12	1	0,51
555	0	262	2	0	0,2
556	0	262	4	0	0,32
557	0	262	5	0	0,34
558	0	262	6	0	0,42
559	0	262	7	0	0,46
560	0	263	7	0	0,37
561	0	263	11	0	0,27
562	0	263	12	0	0,36
563	0	264	3	0	0,25
564	0	264	4	0	0,23
565	0	264	5	0	0,31
566	0	264	7	0	0,56
567	0	265	0	1	0,11
568	0	265	1	1	0,1
569	0	265	2	1	0,1
570	0	266	0	1	0,33
571	0	266	4	1	0,37
572	0	266	5	1	0,46
573	0	266	6	1	0,53
574	0	266	7	1	0,77
575	0	267	0	0	0,36
576	0	267	2	0	0,43
577	0	268	2	1	0,56
578	0	268	2	1	0,46
579	0	268	3	1	0,69
580	0	268	3	1	0,76
581	0	269	4	0	1,46
582	0	270	3	1	0,88
583	0	270	4	1	0,69
584	0	270	5	1	0,51
585	0	271	7	1	0,8
586	0	271	8	1	0,91
587	0	271	9	1	0,85
588	0	271	9	1	0,84
589	0	272	0	0	0,58
590	0	272	2	0	0,48
591	0	272	5	0	0,68
592	0	273	0	0	0,49
593	0	274	1	0	0,27
594	0	274	3	0	0,18
595	0	274	4	0	0,2
596	0	275	2	1	0,23
597	0	275	3	1	0,23
598	0	275	4	1	0,23
599	0	275	5	1	0,34
600	0	275	6	1	0,36
601	0	275	7	1	0,54
602	0	276	6	0	0,27
603	0	276	8	0	0,18
604	0	276	9	0	0,28
605	0	277	2	0	0,35
606	0	277	4	0	0,57
607	0	277	6	0	0,81
608	0	277	7	0	0,87
609	0	278	2	0	1,1
610	0	278	3	0	0,93
611	0	278	4	0	0,67
612	0	279	0	0	0,19
613	0	279	2	0	0,16
614	0	279	6	0	0,22
615	0	279	9	0	0,15
616	0	280	0	0	0,3
617	0	281	16	1	0,67
618	0	282	5	0	0,85
619	0	283	1	1	0,7
620	0	284	4	0	0,69
621	0	284	5	0	0,69
622	0	284	6	0	0,84
623	0	284	7	0	1,1
624	0	285	1	0	0,31
625	0	285	3	0	0,57
626	0	285	4	0	0,6
627	0	286	0	0	0,62
628	0	286	2	0	0,87
629	0	286	3	0	0,88
630	0	286	5	0	0,8
631	0	287	4	0	0,34
632	0	287	6	0	0,48
633	0	288	7	1	0,56
634	0	288	8	1	0,61
635	0	288	8	1	0,51
636	0	288	9	1	0,88
637	0	288	9	1	0,98
638	0	288	9	1	0,86
639	0	288	9	1	1,01
640	0	288	10	1	1,18
641	0	288	11	1	0,95
642	0	288	11	1	0,87
643	0	288	11	1	0,8
644	0	289	2	0	1,45
645	0	290	2	0	0,85
646	0	290	4	0	0,75
647	0	290	6	0	0,91
648	0	291	2	0	1,17
649	0	291	4	0	1,1
650	0	291	6	0	1,19
651	0	292	3	1	0,4
652	0	292	4	1	0,67
653	0	292	5	1	0,58
654	0	293	15	0	0,44
655	0	293	17	0	0,24
656	0	294	4	0	0,42
657	0	294	6	0	0,29
658	0	294	7	0	0,39
659	0	295	25	1	0,97
660	0	296	3	0	0,78
661	0	296	4	0	1
662	0	297	2	0	0,34
663	0	297	4	0	0,55
664	0	298	0	0	0,53
665	0	298	2	0	0,39
666	0	298	3	0	0,45
667	0	298	4	0	0,43
668	0	298	5	0	0,67
669	0	299	3	0	0,58
670	0	299	5	0	0,62
671	0	299	7	0	0,58
672	0	300	2	0	0,28
673	0	300	3	0	0,31
674	0	300	4	0	0,29
675	0	300	6	0	0,49
676	0	301	0	0	0,84
677	0	301	9	0	0,43
678	0	301	12	0	0,39
679	0	302	2	0	0,28
680	0	302	3	0	0,59
681	0	302	4	0	0,29
682	0	303	2	0	0,24
683	0	304	2	0	0,26
684	0	305	3	0	0,38
685	0	305	4	0	0,46
686	0	306	1	0	0,36
687	0	307	1	1	0,71
688	0	307	3	1	0,52
689	0	307	4	1	0,49
690	0	308	1	1	0,4
691	0	308	2	1	0,26
692	0	309	1	1	0,48
693	0	309	2	1	0,46
694	0	309	3	1	0,48
695	0	309	3	1	0,48
696	0	309	4	1	0,51
697	0	310	1	0	0,55
698	0	310	3	0	0,91
699	0	310	4	0	0,96
700	0	311	2	0	0,99
701	0	311	3	0	1,18
702	0	311	4	0	1,23
703	0	312	2	0	0,22
704	0	312	3	0	0,24
705	0	313	2	0	0,33
706	0	313	3	0	0,38
707	0	313	4	0	0,28
708	0	314	2	0	0,85
709	0	314	3	0	0,68
710	0	314	4	0	0,6
711	0	315	2	1	0,4
712	0	316	2	0	0,31
715	0	318	1	0	0,2
716	0	318	2	0	0,2
717	0	318	4	0	0,11
718	0	318	7	0	0,16
719	0	318	9	0	0,3
720	0	319	2	1	0,44
721	0	319	3	1	0,48
722	0	319	4	1	0,85
723	0	319	5	1	0,95
724	0	319	6	1	1
725	0	319	9	1	0,95
726	0	319	10	1	0,86
727	0	319	11	1	0,94
728	0	319	12	1	1,68
729	0	319	13	1	1,61
730	0	320	0	1	0,35
731	0	321	0	0	0,27
732	0	321	3	0	0,59
733	0	322	0	0	0,46
734	0	322	1	0	0,48
735	0	323	0	0	0,4
736	0	323	4	0	0,35
737	0	324	3	0	0,42
738	0	325	2	0	0,3
739	0	326	0	1	0,38
740	0	326	1	1	0,42
741	0	326	2	1	0,24
742	0	326	3	1	0,23
743	0	326	4	1	0,34
744	0	327	1	0	0,29
745	0	328	2	1	0,49
746	0	328	3	1	0,73
747	0	329	0	0	1,14
748	0	329	1	0	1,28
749	0	329	2	0	1,03
750	0	329	3	0	0,94
751	0	330	0	0	0,33
752	0	331	8	1	0,19
753	0	331	9	1	0,18
754	0	331	10	1	0,18
755	0	331	11	1	0,18
756	0	331	14	1	0,42
757	0	331	15	1	0,5
758	0	331	16	1	0,74
759	0	331	17	1	0,83
760	0	331	18	1	0,95
761	0	332	0	1	1,19
762	0	332	0	1	1,27
763	0	333	5	1	0,34
764	0	333	6	1	0,47
765	0	333	7	1	0,55
766	0	334	2	0	1,3
767	0	334	3	0	1,29
768	0	335	10	1	1,02
769	0	335	11	1	1,54
770	0	335	12	1	0,86
771	0	335	13	1	0,76
772	0	335	14	1	0,67
773	0	335	19	1	0,93
774	0	335	20	1	0,44
775	0	335	21	1	0,9
776	0	336	1	1	0,93
777	0	337	0	0	0,25
778	0	338	3	0	0,58
779	0	339	0	0	0,42
780	0	340	0	0	1,96
781	0	341	9	1	0,98
782	0	341	12	1	1,2
783	0	341	13	1	0,96
784	0	341	14	1	0,8
785	0	341	15	1	1,04
786	0	341	16	1	0,9
787	0	341	21	1	0,85
788	0	341	22	1	0,89
789	0	341	23	1	1,04
790	0	342	0	0	1,15
791	0	343	3	0	0,3
792	0	344	0	0	1,17
793	0	345	2	1	0,56
794	0	346	0	0	0,28
795	0	346	3	0	0,25
796	0	347	10	0	0,64
797	0	347	11	0	0,61
798	0	348	3	1	0,07
799	0	348	6	1	0,11
800	0	349	4	1	0,65
801	0	349	4	1	0,47
802	0	349	5	1	0,58
803	0	349	6	1	0,6
804	0	349	7	1	0,47
805	0	349	12	1	1,18
806	0	349	13	1	1,34
807	0	349	14	1	0,95
808	0	349	15	1	0,9
809	0	350	5	1	0,34
810	0	350	8	1	0,43
811	0	350	9	1	0,63
812	0	350	10	1	0,77
813	0	350	11	1	1,03
814	0	350	12	1	0,92
815	0	350	17	1	0,65
816	0	350	18	1	0,68
817	0	350	19	1	0,8
818	0	351	5	0	0,49
819	0	352	0	0	0,19
820	0	352	2	0	0,31
821	0	353	2	1	0,28
822	0	353	3	1	0,25
823	0	353	4	1	0,31
824	0	354	3	0	0,43
825	0	355	1	1	0,34
826	0	355	5	1	0,56
827	0	355	6	1	0,62
828	0	355	7	1	0,75
829	0	355	8	1	0,69
830	0	355	11	1	0,97
831	0	355	12	1	1,17
832	0	355	13	1	1,13
833	0	355	14	1	1,19
834	0	355	15	1	0,88
835	0	356	2	1	0,13
836	0	356	5	1	0,3
837	0	356	6	1	0,42
838	0	356	7	1	0,47
839	0	356	8	1	0,66
840	0	356	9	1	0,65
841	0	356	12	1	0,74
842	0	356	13	1	0,61
843	0	356	14	1	0,75
844	0	356	15	1	1,13
845	0	356	16	1	1,19
846	0	357	0	0	0,54
847	0	358	0	0	0,3
848	0	359	1	0	0,35
849	0	359	3	0	0,57
850	0	359	9	0	0,67
851	0	360	1	1	0,16
852	0	360	2	1	0,22
853	0	360	3	1	0,34
854	0	360	4	1	0,39
855	0	360	7	1	0,62
856	0	360	8	1	0,73
857	0	360	9	1	0,64
858	0	360	10	1	0,78
859	0	360	10	1	0,7
860	0	360	11	1	0,6
861	0	361	1	1	0,48
862	0	361	2	1	0,58
863	0	361	9	1	0,5
864	0	361	10	1	0,4
865	0	361	11	1	0,46
866	0	362	0	0	0,58
867	0	363	2	0	0,3
868	0	364	4	0	0,34
869	0	364	6	0	0,33
870	0	365	0	0	0,54
871	0	365	5	0	1,1
872	0	365	6	0	1,16
873	0	365	7	0	1,05
874	0	365	8	0	1,15
875	0	365	9	0	1,14
876	0	366	3	0	0,17
877	0	367	0	0	0,51
878	0	367	2	0	0,56
879	0	368	10	1	0,59
880	0	369	3	0	0,45
881	0	369	5	0	0,61
882	0	369	8	0	0,6
883	0	370	0	0	0,41
884	0	371	0	0	0,75
885	0	372	5	0	0,55
886	0	373	0	0	0,56
887	0	374	0	0	0,54
888	0	375	0	0	0,33
889	0	375	2	0	0,22
890	0	375	6	0	0,41
891	0	376	0	0	0,64
892	0	376	0	0	0,69
893	0	377	0	1	0,32
894	0	377	1	1	0,17
895	0	377	2	1	0,39
896	0	377	5	1	0,67
897	0	377	6	1	0,59
898	0	377	7	1	0,62
899	0	377	8	1	0,81
900	0	377	9	1	0,72
901	0	378	0	1	0,25
902	0	378	2	1	0,29
903	0	378	3	1	0,54
904	0	378	6	1	1,2
905	0	378	7	1	1,18
906	0	378	8	1	1,24
907	0	378	9	1	1,38
908	0	378	10	1	1,84
909	0	379	0	0	0,21
910	0	380	0	0	0,62
911	0	381	2	0	0,59
912	0	382	2	1	0,15
913	0	383	4	0	0,29
914	0	384	1	1	0,55
915	0	384	2	1	0,67
916	0	384	5	1	1,01
917	0	384	6	1	0,73
918	0	384	7	1	0,65
919	0	384	8	1	1,03
920	0	384	8	1	0,99
921	0	385	1	1	1,04
922	0	386	0	0	0,76
923	0	386	1	0	0,64
924	0	387	4	0	0,65
925	0	388	1	0	1,05
926	0	389	2	0	0,29
927	0	389	6	0	0,67
928	0	390	2	0	0,19
929	0	390	6	0	0,42
930	0	390	10	0	0,56
931	0	391	0	1	0,47
932	0	392	2	1	0,22
933	0	392	5	1	0,54
934	0	393	5	0	0,53
935	0	394	2	0	0,2
936	0	395	2	0	0,52
937	0	396	2	0	1,01
938	0	397	2	0	0,44
939	0	397	5	0	0,6
940	0	398	6	0	0,75
941	0	399	2	0	1,04
942	0	400	0	0	0,64
943	0	400	1	0	0,4
944	0	400	4	0	0,32
945	0	401	4	1	0,47
946	0	401	5	1	0,58
947	0	401	6	1	0,58
948	0	401	7	1	0,61
949	0	401	8	1	0,79
950	0	402	3	0	0,41
951	0	403	2	0	0,7
952	0	404	2	0	0,27
953	0	405	2	1	0,51
954	0	405	5	1	0,23
955	0	405	5	1	0,37
956	0	405	6	1	0,12
957	0	406	0	1	0,37
958	0	406	2	1	0,39
959	0	406	3	1	0,34
960	0	406	4	1	0,31
961	0	407	2	0	0,31
962	0	407	6	0	0,17
963	0	407	7	0	0,2
964	0	407	9	0	0,2
965	0	407	13	0	0,28
966	0	408	0	0	0,55
967	0	408	3	0	0,8
968	0	409	2	0	0,7
969	0	409	5	0	0,82
970	0	410	0	0	0,34
971	0	410	2	0	0,39
972	0	411	0	0	0,31
973	0	412	2	1	0,12
974	0	412	5	1	0,16
975	0	412	6	1	0,23
976	0	413	0	1	0,27
977	0	413	3	1	0,25
978	0	413	4	1	0,42
979	0	413	5	1	0,49
980	0	413	6	1	0,61
981	0	413	7	1	0,69
982	0	414	1	0	0,26
983	0	415	1	0	0,26
984	0	416	0	0	0,42
985	0	416	1	0	0,29
986	0	417	0	0	0,82
987	0	417	1	0	0,98
988	0	417	2	0	0,91
989	0	417	4	0	0,96
990	0	417	7	0	0,98
991	0	417	9	0	0,83
992	0	418	13	0	0,44
993	0	418	14	0	0,25
994	0	418	17	0	0,26
995	0	418	18	0	0,29
996	0	418	19	0	0,39
997	0	418	21	0	0,31
998	0	418	24	0	0,47
999	0	418	26	0	0,9
1000	0	419	0	0	0,49
1001	0	419	2	0	0,43
1002	0	419	3	0	0,5
1003	0	420	0	1	0,32
1004	0	420	1	1	0,28
1005	0	421	0	1	0,37
1006	0	421	0	1	0,3
1007	0	422	0	1	0,37
1008	0	422	1	1	0,67
1009	0	422	2	1	0,57
1010	0	423	0	1	0,73
1011	0	423	2	1	0,38
1012	0	423	4	1	0,42
1013	0	424	0	0	0,39
1014	0	424	1	0	0,22
1015	0	424	5	0	0,46
1016	0	424	7	0	0,49
1017	0	425	12	1	0,2
1018	0	426	0	1	0,74
1019	0	427	0	1	0,26
1020	0	427	1	1	0,18
1021	0	428	0	0	0,27
1022	0	428	3	0	0,26
1023	0	428	4	0	0,34
1024	0	428	6	0	0,41
1025	0	429	0	1	0,65
1026	0	429	1	1	0,47
1027	0	429	2	1	0,38
1028	0	429	5	1	0,36
1029	0	429	8	1	0,57
1030	0	429	11	1	1,29
1031	0	430	1	1	0,2
1032	0	431	0	0	0,56
1033	0	432	0	0	1,42
1034	0	432	1	0	0,91
1035	0	432	3	0	1,11
1036	0	433	0	0	0,73
1037	0	433	1	0	0,62
1038	0	433	2	0	0,37
1039	0	434	0	0	0,13
1040	0	434	1	0	0,19
1041	0	434	3	0	0,24
1042	0	434	5	0	0,48
1043	0	434	7	0	0,71
1044	0	435	8	0	0,7
1045	0	435	11	0	0,63
1046	0	436	0	1	0,39
1047	0	437	0	1	0,5
1048	0	437	2	1	0,84
1049	0	438	0	0	0,55
1050	0	438	2	0	0,34
1051	0	438	4	0	0,4
1052	0	439	0	1	0,52
1053	0	439	2	1	1,49
1054	0	440	2	0	0,44
1055	0	441	0	0	0,38
1056	0	441	1	0	0,39
1057	0	441	3	0	0,46
1058	0	442	0	1	0,54
1059	0	442	1	1	0,59
1060	0	442	2	1	0,62
1061	0	442	3	1	0,68
1062	0	442	6	1	0,79
1063	0	443	0	1	0,32
1064	0	443	2	1	0,3
1065	0	443	4	1	0,33
1066	0	443	5	1	0,43
1067	0	444	0	1	0,65
1068	0	444	1	1	0,69
1069	0	445	0	0	0,16
1070	0	445	1	0	0,12
1071	0	445	6	0	0,28
1072	0	445	8	0	0,39
1073	0	445	10	0	0,44
1074	0	445	13	0	0,39
1075	0	446	2	1	0,51
1076	0	446	6	1	0,6
1077	0	446	8	1	0,72
1078	0	446	11	1	0,81
1079	0	446	18	1	1,02
1080	0	446	20	1	1,08
1081	0	447	1	0	0,14
1082	0	447	3	0	0,29
1083	0	447	6	0	0,34
1084	0	447	8	0	0,44
1085	0	447	10	0	0,41
1086	0	447	13	0	0,47
1087	0	448	0	0	0,73
1088	0	448	2	0	0,65
1089	0	449	0	0	0,36
1090	0	449	1	0	0,34
1091	0	449	4	0	0,56
1092	0	449	6	0	1,01
1093	0	449	8	0	0,71
1094	0	450	0	0	0,32
1095	0	450	2	0	0,27
1096	0	450	3	0	0,29
1097	0	450	5	0	0,22
1098	0	451	0	0	0,82
1099	0	452	0	1	1,12
1100	0	453	0	1	0,28
1101	0	453	4	1	0,26
1102	0	453	6	1	0,31
1103	0	453	8	1	0,25
1104	0	454	7	0	0,53
1105	0	454	10	0	0,56
1106	0	455	0	1	0,48
1107	0	455	2	1	0,53
1108	0	455	4	1	0,95
1109	0	456	0	0	0,08
1110	0	456	4	0	1,22
1111	0	457	1	0	0,28
1112	0	457	3	0	0,26
1113	0	457	5	0	0,38
1114	0	457	8	0	0,51
1115	0	457	10	0	0,64
1116	0	457	12	0	0,73
1117	0	458	0	0	0,48
1118	0	458	1	0	0,5
1119	0	459	0	1	0,68
1120	0	460	0	1	0,39
1121	0	460	2	1	0,18
1122	0	461	0	0	0,4
1123	0	461	3	0	0,63
1124	0	462	1	0	0,35
1125	0	463	0	1	0,47
1126	0	464	0	0	0,64
1127	0	464	1	0	0,52
1128	0	464	3	0	0,67
1129	0	465	0	0	0,62
1130	0	465	3	0	0,57
1131	0	466	0	0	0,31
1132	0	467	0	0	0,24
1133	0	468	0	1	1,14
1134	0	468	1	1	1,15
1135	0	469	0	0	0,56
1136	0	469	1	0	0,49
1137	0	470	0	0	0,61
1138	0	471	0	0	0,66
1139	0	471	1	0	0,58
1140	0	471	4	0	0,58
1141	0	472	0	1	0,61
1143	0	472	11	1	0,37
1144	0	472	13	1	0,65
1145	0	473	0	1	1,01
1146	0	473	1	1	0,76
1147	0	473	3	1	0,46
1148	0	474	3	0	0,51
1149	0	474	5	0	0,56
1150	0	475	0	1	0,27
1151	0	476	0	0	0,39
1152	0	476	1	0	0,45
1153	0	477	0	1	0,57
1154	0	477	4	1	0,26
1155	0	477	6	1	0,19
1156	0	477	8	1	0,35
1157	0	477	10	1	0,96
1158	0	478	0	0	0,39
1159	0	478	1	0	0,34
1160	0	478	4	0	0,52
1161	0	479	0	0	0,11
1162	0	479	2	0	0,13
1163	0	479	4	0	0,18
1164	0	479	7	0	0,47
1165	0	480	0	0	0,67
1166	0	480	1	0	0,64
1167	0	480	4	0	0,7
1168	0	480	6	0	0,86
1169	0	481	0	0	0,23
1170	0	482	0	0	0,3
1171	0	483	2	1	0,48
1172	0	484	0	0	0,62
1173	0	484	1	0	0,4
1174	0	485	0	0	0,68
1175	0	485	2	0	0,6
1176	0	485	5	0	0,84
1177	0	485	7	0	0,93
1178	0	485	9	0	0,64
1179	0	486	0	0	0,29
1180	0	486	3	0	0,33
1181	0	487	0	1	0,79
1182	0	487	1	1	0,59
1183	0	487	3	1	0,8
1184	0	487	5	1	0,32
1185	0	488	0	1	0,67
1186	0	488	2	1	0,32
1187	0	488	4	1	0,26
1188	0	488	7	1	0,31
1189	0	489	0	0	0,75
1190	0	489	4	0	0,62
1191	0	490	4	0	0,76
1192	0	490	7	0	0,62
1193	0	491	1	1	0,39
1194	0	491	2	1	0,32
1195	0	491	3	1	0,35
1196	0	491	6	1	0,35
1197	0	491	8	1	0,48
1198	0	491	10	1	0,49
1199	0	492	0	0	1
1200	0	492	1	0	1,42
1201	0	493	0	0	0,52
1202	0	493	1	0	0,48
1203	0	494	0	0	0,63
1204	0	494	2	0	0,81
1205	0	494	3	0	0,75
1206	0	495	0	1	0,37
1207	0	495	2	1	0,22
1208	0	495	4	1	0,24
1209	0	495	6	1	0,29
1210	0	495	6	1	0,36
1211	0	495	7	1	0,4
1212	0	496	0	1	0,45
1213	0	496	1	1	0,3
1214	0	497	9	1	0,71
1215	0	497	12	1	0,98
1216	0	498	0	0	0,44
1217	0	498	1	0	0,45
1218	0	498	3	0	0,55
1219	0	498	5	0	0,63
1220	0	499	0	0	0,49
1221	0	500	0	1	0,43
1222	0	500	1	1	0,36
1223	0	500	2	1	0,69
1224	0	500	4	1	0,97
1225	0	500	7	1	1,03
1226	0	500	9	1	1,18
1227	0	501	0	0	0,26
1228	0	501	4	0	0,22
1229	0	501	6	0	0,24
1230	0	501	8	0	0,38
1231	0	501	11	0	0,49
1232	0	502	0	0	0,38
1233	0	503	0	1	0,52
1234	0	503	1	1	0,4
1235	0	504	0	0	0,61
1236	0	504	13	0	1,61
1237	0	504	15	0	1,04
1238	0	504	18	0	0,9
1239	0	505	0	0	0,25
1240	0	506	0	1	0,3
1241	0	506	2	1	0,16
1242	0	507	0	0	0,68
1243	0	507	7	0	1,23
1244	0	508	0	0	0,46
1245	0	509	0	0	0,36
1246	0	510	0	0	0,33
1247	0	510	2	0	0,22
1248	0	510	4	0	0,42
1249	0	510	7	0	0,5
1250	0	511	0	1	0,43
1251	0	511	1	1	0,24
1252	0	512	0	0	0,29
1253	0	512	1	0	0,37
1254	0	512	3	0	0,64
1255	0	512	5	0	0,84
1256	0	512	8	0	0,85
1257	0	512	12	0	0,89
1258	0	513	0	1	0,44
1259	0	513	1	1	0,71
1260	0	513	3	1	0,24
1261	0	514	0	1	0,23
1262	0	514	1	1	0,36
1263	0	514	3	1	0,27
1264	0	514	7	1	0,4
1265	0	514	10	1	0,41
1266	0	514	11	1	0,42
1267	0	514	14	1	0,52
1268	0	514	16	1	0,53
1269	0	515	1	0	0,29
1270	0	515	4	0	0,76
1271	0	516	0	0	0,68
1272	0	516	1	0	0,82
1273	0	516	2	0	0,76
1274	0	516	4	0	0,75
1275	0	516	7	0	0,95
1276	0	517	0	0	0,28
1277	0	517	1	0	0,31
1278	0	517	3	0	0,09
1279	0	517	5	0	0,14
1280	0	517	9	0	0,3
1281	0	517	10	0
1282	0	518	0	1	0,3
1283	0	519	0	0	0,86
1284	0	519	4	0	1,06
1285	0	519	6	0	0,97
1286	0	519	8	0	1,09
1287	0	520	0	0	0,34
1288	0	520	3	0	0,37
1289	0	520	5	0	0,54
1290	0	520	8	0	0,45
1291	0	521	0	0	0,43
1292	0	522	0	0	0,74
1293	0	522	3	0	0,42
1294	0	523	0	0	0,4
1295	0	523	1	0	0,41
1296	0	524	0	1	0,26
1297	0	525	0	1	0,73
1298	0	525	1	1	0,68
1299	0	525	3	1	0,7
1300	0	526	0	0	0,25
1301	0	526	1	0	0,26
1302	0	527	0	0	0,34
1303	0	527	3	0	0,09
1304	0	527	4	0	0,12
1305	0	527	6	0	0,23
1306	0	527	8	0	0,21
1307	0	527	11	0	0,27
1308	0	528	0	1	0,49
1309	0	528	2	1	0,7
1310	0	529	0	0	0,43
1311	0	529	3	0	0,44
1312	0	529	6	0	0,6
1313	0	529	8	0	0,79
1314	0	529	13	0	1
1315	0	530	0	1	0,31
1316	0	530	2	1	0,27
1317	0	530	8	1	0,97
1318	0	531	0	0	0,49
1319	0	532	0	0	0,73
1320	0	533	0	0	0,38
1321	0	533	1	0	0,23
1322	0	533	4	0	0,48
1323	0	533	6	0	0,66
1324	0	534	0	1	0,17
1325	0	534	2	1	0,16
1326	0	534	4	1	0,15
1327	0	534	5	1	0,11
1328	0	534	7	1	0,1
1329	0	535	0	1	0,64
1330	0	536	0	0	0,61
1331	0	536	2	0	0,85
1332	0	537	0	0	0,39
1333	0	537	2	0	0,56
1334	0	537	4	0	0,56
1335	0	537	7	0	0,87
1336	0	538	0	0	0,32
1337	0	539	0	0	0,21
1338	0	539	1	0	0,25
1339	0	539	3	0	0,35
1340	0	539	5	0	0,42
1341	0	540	0	0	0,44
1342	0	540	2	0	0,35
1343	0	540	4	0	0,83
1344	0	540	5	0	0,57
1345	0	541	0	1	0,59
1346	0	541	1	1	0,4
1347	0	542	0	0	0,22
1348	0	542	4	0	0,25
1349	0	543	0	0	0,26
1350	0	544	0	0	0,37
1351	0	544	1	0	0,28
1352	0	544	3	0	0,37
1353	0	544	4	0	0,41
1354	0	544	6	0	0,39
1355	0	545	0	0	0,49
1356	0	545	2	0	0,29
1357	0	546	0	0	0,85
1358	0	547	0	1	0,39
1359	0	547	7	1	0,95
1360	0	547	7	1	1,12
1361	0	547	8	1	0,95
1362	0	547	9	1	1,09
1363	0	547	10	1	1,34
1364	0	547	11	1	1,56
1365	0	547	12	1	1,55
1366	0	547	13	1	1,11
1367	0	547	14	1	0,95
1368	0	547	15	1	0,76
1369	0	547	16	1	0,73
1370	0	548	0	1	1,32
1371	0	548	2	0	1,39
1372	0	549	0	0	0,62
1373	0	549	5	0	0,54
1374	0	549	9	0	0,3
1375	0	549	13	0	0,29
1376	0	549	15	0	0,21
1377	0	549	16	0	0,3
1378	0	549	19	0	0,6
1379	0	550	0	0	0,35
1380	0	551	0	0	0,26
1381	0	551	2	0
1382	0	551	6	0	0,63
1383	0	551	9	0	0,97
1384	0	552	0	0	0,8
1385	0	552	5	0	0,37
1386	0	552	7	0	0,59
1387	0	552	8	0	0,69
1388	0	553	0	0	0,1
1389	0	553	2	0	0,14
1390	0	554	0	1	0,2
1391	0	554	4	1	0,48
1392	0	554	5	1	0,54
1393	0	554	6	1	0,92
1394	0	554	7	1	0,74
1395	0	554	8	1	0,67
1396	0	554	9	1	0,8
1397	0	554	10	1	0,96
1398	0	554	11	1	1,09
1399	0	555	0	1	0,17
1400	0	555	3	1	0,52
1401	0	555	4	1	0,87
1402	0	555	5	1	1,68
1403	0	555	6	1	1,43
1404	0	555	7	1	1,57
1405	0	555	8	1	1,53
1406	0	555	9	1	1,13
1407	0	555	10	1	1,34
1408	0	555	11	1	1,62
1409	0	555	12	1	1,84
1410	0	556	0	1	0,13
1411	0	556	4	1	0,42
1412	0	556	5	1	0,54
1413	0	556	6	1	0,43
1414	0	556	7	1	0,59
1415	0	556	8	1	0,79
1416	0	556	9	1	1,04
1417	0	556	10	1	1,05
1418	0	556	11	1	0,69
1419	0	556	12	1	0,78
1420	0	556	13	1	1,12
1421	0	557	0	1	0,23
1422	0	557	2	1	0,16
1423	0	558	0	1	0,42
1424	0	558	0	1	0,25
1425	0	558	1	1	0,41
1426	0	558	2	1	0,41
1427	0	558	3	1	0,63
1428	0	558	4	1	0,72
1429	0	558	4	1	0,89
1430	0	558	5	1	0,95
1431	0	558	6	1	1,02
1432	0	558	7	1	0,91
1433	0	558	8	1
1434	0	559	0	1	0,43
1435	0	559	0	1	0,23
1436	0	559	2	1	0,2
1437	0	559	2	1	0,39
1438	0	559	3	1	0,37
1439	0	559	4	1	0,5
1440	0	559	5	1	0,34
1441	0	559	6	1	0,49
1442	0	559	7	1	0,37
1443	0	559	8	1	0,44
1444	0	559	9	1
1445	0	560	0	1	0,79
1446	0	560	1	1	0,92
1447	0	560	2	1	0,7
1448	0	560	3	1	0,57
1449	0	560	4	1	0,67
1450	0	560	5	1	1,27
1451	0	560	6	1	1,8
1452	0	560	7	1	1,38
1453	0	560	8	1	1,49
1454	0	560	9	1	1,43
1455	0	560	10	1	1,74
1456	0	561	0	0	0,44
1457	0	561	1	0	0,41
1458	0	561	2	0	0,32
1459	0	561	7	0	0,81
1460	0	562	0	0	0,35
1461	0	562	3	0	0,41
1462	0	563	0	0	0,49
1463	0	563	1	0	0,59
1464	0	563	2	0	0,44
1465	0	564	0	0	0,15
1466	0	564	5	0	0,18
1467	0	564	7	0	0,34
1468	0	565	0	0	0,19
1469	0	565	2	0	0,32
1470	0	565	4	0	0,51
1471	0	565	7	0	0,8
1472	0	566	0	1	0,17
1473	0	566	2	1	0,22
1474	0	566	4	1	0,62
1475	0	566	5	1	0,88
1476	0	566	5	1	0,79
1477	0	566	5	1	0,68
1478	0	566	6	1	0,56
1479	0	566	7	1	0,65
1480	0	566	10	1	0,56
1481	0	566	11	1	0,56
1482	0	567	0	1	0,16
1483	0	567	4	1	0,32
1484	0	567	5	1	0,41
1485	0	567	6	1	0,55
1486	0	567	7	1	0,42
1487	0	567	8	1	0,46
1488	0	567	9	1	0,51
1489	0	567	10	1	0,68
1490	0	567	11	1	0,83
1491	0	567	12	1	0,58
1492	0	567	13	1	0,72
1493	0	568	0	0
1494	0	568	1	0	0,41
1495	0	569	0	0	0,63
1496	0	569	1	0	0,41
1497	0	569	1	0	0,5
1498	0	570	0	0	0,63
1499	0	570	1	0	0,57
1500	0	570	3	0	0,65
1501	0	571	0	0	0,28
1502	0	571	1	0	0,21
1503	0	571	2	0	0,14
1504	0	571	3	0	0,18
1505	0	572	0	1	0,44
1506	0	572	1	1	0,48
1507	0	573	4	1	0,25
1508	0	574	2	0	0,19
1509	0	574	4	0	0,14
1510	0	574	6	0	0,11
1511	0	574	11	0	0,1
1512	0	574	13	0	0,1
1513	0	574	15	0	0,15
1514	0	574	17	0	0,23
1515	0	575	4	0	0,52
1516	0	576	13	0	0,55
1517	0	577	5	1	0,75
1518	0	577	7	1	1,14
1519	0	577	10	1	2,03
1520	0	578	4	0	0,38
1521	0	579	5	0	0,51
1522	0	579	9	0	0,65
1523	0	579	11	0	0,62
1524	0	579	13	0	0,74
1525	0	579	16	0	0,75
1526	0	580	0	1	0,61
1527	0	580	5	1	0,29
1528	0	581	2	1	0,56
1529	0	581	4	1	0,49
1530	0	581	7	1	0,23
1531	0	581	9	1	0,52
1532	0	581	11	1	0,45
1533	0	581	14	1	0,62
1534	0	582	1	1	0,68
1535	0	582	3	1	0,78
1536	0	582	4	1	0,67
1537	0	582	6	1	0,47
1538	0	582	8	1	0,7
1539	0	583	1	1	0,19
1540	0	583	2	1	0,13
1541	0	583	3	1	0,17
1542	0	583	5	1	0,39
1543	0	583	8	1	0,54
1544	0	583	10	1	0,77
1545	0	583	10	1	0,68
1546	0	583	12	1	0,68
1547	0	583	15	1	0,92
1548	0	584	1	0	0,39
1549	0	584	6	0	0,48
1550	0	584	9	0	0,48
1551	0	584	13	0	0,49
1552	0	585	1	0	0,52
1553	0	585	3	0	0,22
1554	0	585	5	0	0,3
1555	0	586	0	0	0,62
1556	0	586	2	0	0,47
1557	0	587	0	1	0,27
1558	0	587	2	1	0,33
1559	0	587	4	1	0,38
1560	0	587	5	1	0,35
1561	0	587	7	1	0,47
1562	0	587	9	1	0,53
1563	0	587	12	1	0,46
1564	0	588	1	0	0,59
1565	0	588	3	0	0,65
1566	0	589	1	0	0,45
1567	0	589	3	0	0,39
1568	0	590	1	0	0,9
1569	0	590	2	0	0,96
1570	0	590	5	0	1,11
1571	0	590	7	0	0,8
1572	0	591	0	0	0,61
1573	0	591	1	0	0,5
1574	0	591	2	0	0,51
1575	0	591	4	0	0,81
1576	0	592	0	0	0,25
1577	0	592	5	0	0,33
1578	0	592	7	0	0,37
1579	0	592	9	0	0,57
1580	0	592	11	0	0,55
1581	0	593	0	0	0,93
1582	0	593	3	0	0,6
1583	0	594	1	1	0,5
1584	0	594	2	1	0,4
1585	0	594	5	1	0,3
1586	0	594	5	1	0,31
1587	0	594	7	1	0,13
1588	0	594	9	1	0,15
1589	0	594	12	1	0,21
1590	0	595	0	0	0,61
1591	0	595	2	0	0,43
1592	0	596	0	0	0,69
1593	0	596	8	0	1,34
1594	0	596	9	0	0,95
1595	0	597	0	1	0,49
1596	0	597	2	1	0,45
1597	0	598	0	0	0,52
1598	0	598	2	0	0,34
1599	0	599	0	0	0,26
1600	0	599	1	0	0,37
1601	0	599	2	0	0,21
1602	0	599	4	0	0,49
1603	0	599	6	0	0,58
1604	0	599	8	0	0,49
1605	0	599	9	0	0,47
1606	0	599	11	0	0,56
1607	0	600	0	0	0,3
1608	0	600	1	0	0,22
1609	0	600	3	0	0,55
1610	0	601	0	0	0,11
1611	0	601	2	0	0,09
1612	0	601	4	0	0,23
1613	0	602	1	0	0,67
1614	0	602	3	0	0,61
1615	0	602	4	0	0,57
1616	0	602	6	0	0,76
1617	0	602	8	0	0,91
1618	0	602	10	0	0,91
1619	0	603	2	1	0,12
1620	0	603	4	1	0,18
1621	0	603	6	1	0,32
1622	0	603	7	1	0,34
1623	0	603	8	1	0,38
1624	0	603	9	1	0,35
1625	0	603	10	1	0,68
1626	0	603	11	1	0,63
1627	0	604	0	1	0,18
1628	0	604	3	1	0,35
1629	0	604	5	1	0,39
1630	0	604	7	1	0,6
1631	0	605	1	1
1632	0	605	4	1	0,12
1633	0	605	7	1	0,14
1634	0	605	9	1	0,4
1635	0	606	1	0	0,41
1636	0	606	2	0	0,45
1637	0	607	0	0	0,21
1638	0	607	1	0	0,19
1639	0	607	2	0	0,19
1640	0	607	4	0	0,22
1641	0	607	6	0	0,21
1642	0	607	8	0	0,36
1643	0	608	0	1	0,52
1644	0	608	2	1	0,29
1645	0	608	4	1	0,21
1646	0	609	0	1	0,62
1647	0	609	1	1	0,85
1648	0	609	3	1	0,21
1649	0	609	5	1	0,54
1650	0	609	5	1	0,54
1651	0	610	0	1	0,26
1652	0	610	2	1	0,24
1653	0	610	4	1	0,49
1654	0	610	5	1	0,64
1655	0	610	7	1	1,67
1656	0	610	10	1	1,24
1657	0	611	0	0	0,61
1658	0	611	2	0	0,26
1659	0	612	0	0	0,84
1660	0	612	2	0	0,59
1661	0	612	4	0	0,63
1662	0	613	0	1	0,3
1663	0	613	1	1	0,09
1664	0	613	6	1	0,08
1665	0	613	9	1	0,31
1666	0	614	0	0	1,36
1667	0	614	8	0	1
1668	0	614	10	0	0,54
1669	0	614	12	0	0,49
1670	0	614	14	0	0,34
1671	0	614	16	0	0,24
1672	0	614	18	0	0,24
1673	0	615	1	0	0,08
1674	0	615	2	0	0,19
1675	0	615	4	0	0,29
1676	0	616	1	1	0,34
1677	0	616	3	1	0,28
1678	0	616	4	1	0,24
1679	0	616	6	1	0,52
1680	0	617	0	1	0,91
1681	0	617	1	1	0,61
1682	0	617	3	1	0,78
1683	0	617	5	1	0,78
1684	0	618	2	0	0,36
1685	0	618	4	0	0,51
1686	0	618	6	0	0,56
1687	0	618	8	0	0,59
1688	0	619	2	0	0,23
1689	0	619	4	0	0,34
1690	0	620	3	1	0,83
1691	0	620	3	1	0,99
1692	0	620	5	1	0,72
1693	0	620	8	1	0,58
1694	0	621	2	1	0,27
1695	0	622	0	0	0,58
1696	0	622	5	0	0,8
1697	0	623	0	0	0,56
1698	0	623	2	0	0,2
1699	0	623	4	0	0,15
1700	0	623	6	0	0,16
1701	0	624	0	1	1,78
1702	0	624	1	1	0,57
1703	0	624	3	1	1,15
1704	0	625	0	1	0,12
1705	0	625	2	1	0,45
1706	0	625	3	1	0,59
1707	0	625	4	1	0,64
1708	0	625	7	1	0,53
1710	0	627	0	0	0,1
1711	0	627	1	0
1712	0	627	3	0	0,11
1713	0	627	5	0	0,13
1714	0	628	0	0	0,33
1715	0	628	1	0	0,33
1716	0	628	3	0	0,36
1717	0	629	0	0	0,34
1718	0	629	1	0	0,5
1719	0	629	5	0	1,23
1720	0	630	0	0	0,84
1721	0	630	1	0	0,74
1722	0	630	3	0	0,59
1723	0	631	0	0	0,26
1724	0	631	2	0	0,24
1725	0	631	4	0	0,36
1726	0	631	6	0	0,6
1727	0	632	0	0	0,5
1728	0	632	2	0	0,49
1729	0	632	4	0	0,76
1730	0	632	6	0	1,04
1731	0	633	0	0	0,53
1732	0	633	3	0	0,88
1733	0	633	5	0	0,92
1734	0	633	7	0	0,84
1735	0	634	0	1	0,4
1736	0	634	2	1	0,38
1737	0	634	5	1	0,43
1738	0	634	8	1	0,49
1739	0	635	0	0	0,83
1740	0	635	5	0	0,59
1741	0	635	6	0	0,55
1742	0	636	0	0	0,17
1743	0	636	1	0	0,21
1744	0	636	3	0	0,2
1745	0	636	5	0	0,35
1746	0	637	0	0	0,3
1747	0	637	2	0	0,49
1748	0	637	4	0	0,92
1749	0	638	0	0	0,7
1750	0	638	2	0	0,61
1751	0	639	0	0	0,42
1752	0	639	1	0	0,29
1753	0	639	3	0	0,5
1754	0	640	0	1	0,72
1755	0	640	2	1	0,47
1756	0	640	6	1	0,61
1757	0	640	8	1	1,31
1758	0	641	0	1	0,51
1759	0	641	1	1	0,57
1760	0	642	0	0	0,31
1761	0	642	5	0	0,31
1762	0	642	7	0	0,32
1763	0	643	0	0	0,43
1764	0	643	1	0	0,33
1765	0	643	3	0	0,5
1766	0	643	5	0	0,69
1767	0	643	7	0	0,95
1768	0	644	0	0	1,06
1769	0	644	1	0	1,46
1770	0	645	0	0	0,41
1771	0	645	9	0	0,11
1772	0	645	13	0	0,13
1773	0	646	0	1	1,2
1774	0	646	2	1	0,75
1775	0	646	6	1	1,61
1776	0	647	0	1	0,66
1777	0	647	2	1	0,36
1778	0	648	0	0	0,59
1779	0	649	0	0	0,68
1780	0	649	1	0	0,79
1781	0	649	3	0	0,65
1782	0	649	6	0	0,85
1783	0	650	2	1	0,28
1784	0	651	10	0	0,42
1785	0	651	13	0	0,25
1786	0	651	16	0	0,36
1787	0	652	0	0	0,16
1788	0	652	2	0	0,22
1789	0	652	3	0	0,33
1790	0	652	5	0	0,64
1791	0	653	0	1	0,46
1792	0	653	2	1	0,34
1793	0	653	5	1	0,64
1794	0	654	0	0	0,57
1795	0	654	2	0	0,31
1796	0	655	0	0	0,72
1797	0	655	2	0	0,66
1798	0	656	0	0	0,39
1799	0	656	2	0	0,36
1800	0	656	3	0	0,47
1801	0	657	0	0	0,11
1802	0	657	2	0	0,15
1803	0	658	0	0	0,39
1804	0	658	1	0	0,26
1805	0	658	3	0	0,54
1806	0	658	5	0	0,45
1807	0	659	0	1	0,47
1808	0	659	4	1	0,81
1809	0	660	0	0	0,63
1810	0	660	2	0	0,83
1811	0	661	0	0	0,36
1812	0	661	2	0	0,5
1813	0	662	0	0	0,07
1814	0	662	1	0	0,1
1815	0	662	3	0	0,16
1816	0	663	0	1	0,72
1817	0	663	2	1	0,65
1818	0	663	4	1	0,57
1819	0	664	0	0	0,33
1820	0	664	2	0	0,26
1821	0	665	0	0	0,46
1822	0	665	1	0	0,32
1823	0	665	2	0	0,49
1824	0	665	4	0	0,52
1825	0	665	5	0	0,46
1826	0	666	0	1	0,21
1827	0	666	2	1	0,26
1828	0	666	4	1
1829	0	666	6	1	0,34
1830	0	667	0	0	0,49
1831	0	668	5	1	0,52
1832	0	669	4	0	0,62
1833	0	670	0	0	0,37
1834	0	670	3	0	0,28
1835	0	671	0	0	0,22
1836	0	672	0	1	0,3
1837	0	672	1	1	0,3
1838	0	672	3	1	0,31
1839	0	673	0	0	0,43
1840	0	673	3	0	0,53
1841	0	674	0	1	0,61
1842	0	674	3	1	0,38
1843	0	675	0	0	0,45
1844	0	676	0	1	1,25
1845	0	676	1	1	2,47
1846	0	676	3	1	3,26
1847	0	677	0	1	0,59
1848	0	677	2	1	0,43
1849	0	677	4	1	0,63
1850	0	678	0	1	0,61
1851	0	678	1	1	0,52
1852	0	678	3	1	0,72
1853	0	679	0	0	0,25
1854	0	679	2	0	0,24
1855	0	680	0	0	0,3
1856	0	680	2	0	0,33
1857	0	681	0	0	0,46
1858	0	681	2	0	0,48
1859	0	682	0	0	1,02
1860	0	682	1	0	0,3
1861	0	682	3	0	0,81
1862	0	683	0	0	0,33
1863	0	683	5	0	0,47
1864	0	683	6	0	0,36
1865	0	683	7	0	0,43
1866	0	684	0	0	0,56
1867	0	684	3	0	0,16
1868	0	685	0	1	0,58
1869	0	685	1	1	0,62
1870	0	685	3	1	0,88
1871	0	686	0	1	0,95
1872	0	686	1	1	1,01
1873	0	686	2	1	0,83
1874	0	686	4	1	0,87
1875	0	687	0	1	0,71
1876	0	687	3	1	0,88
1877	0	688	0	0	0,45
1878	0	688	1	0	0,42
1879	0	689	1	0	0,47
1880	0	689	3	0	0,1
1881	0	690	0	1	0,5
1882	0	690	2	1	0,28
1883	0	691	1	0	0,73
1884	0	691	2	0	0,67
1885	0	692	0	0	0,36
1886	0	692	2	0	0,34
1887	0	693	0	1	0,29
1888	0	693	3	1	0,32
1889	0	694	0	0	0,31
1890	0	694	1	0	0,24
1891	0	694	3	0	0,34
1892	0	695	3	1	0,27
1893	0	695	4	1	0,32
1894	0	695	5	1	0,5
1895	0	695	6	1	0,53
1896	0	695	7	1	0,46
1897	0	696	3	1	1,6
1898	0	696	3	1	1,84
1899	0	696	3	1	1,12
1900	0	696	3	1	2,91
1901	0	696	20	1	1,05
1902	0	696	21	1	1,05
1903	0	696	22	1	1,34
1904	0	696	23	1	1,1
1905	0	696	24	1	1,1
1906	0	697	2	0
1907	0	697	3	0
1908	0	698	20	1	0,37
1909	0	698	21	1	0,58
1910	0	698	22	1	0,99
1911	0	698	23	1	0,62
1912	0	698	24	1	0,56
1913	0	698	25	1	0,27
1914	0	698	26	1	0,31
1916	0	700	0	0	0,11
1928	0	703	2	1	0,79
1929	0	703	3	1	0,85
1930	0	703	4	1	0,8
1931	0	703	5	1	0,67
1932	0	703	6	1	0,64
1933	0	703	7	1	0,8
1934	0	703	8	1	0,94
1935	0	704	2	1	1,12
1936	0	704	3	1	1,18
1937	0	704	4	1	0,97
1938	0	704	5	1	0,77
1939	0	704	6	1	0,67
1940	0	704	7	1	0,53
1941	0	704	8	1	0,43
1942	0	705	1	1	0,51
1943	0	705	3	1	0,7
1944	0	705	4	1	0,78
1945	0	705	5	1	1
1946	0	705	6	1	1,07
1947	0	706	5	0
1948	0	707	3	0	0,12
1949	0	707	5	0
1950	0	708	0	0	0,44
1951	0	709	0	1	0,5
1952	0	709	1	1	0,49
1953	0	709	2	1	0,45
1954	0	709	3	1	0,47
1955	0	709	4	1	0,57
1956	0	710	1	1	0,36
1957	0	710	1	1	0,37
1958	0	710	2	1	0,49
1959	0	710	4	1	0,24
1960	0	711	3	1	0,15
1961	0	711	3	1	0,13
1962	0	711	4	1	0,16
1963	0	712	0	1	0,42
1964	0	712	1	1	0,34
1965	0	712	2	1	0,29
1966	0	712	3	1	0,19
1967	0	712	4	1	0,31
1968	0	713	0	0	1,42
1969	0	714	3	0	0,86
1970	0	715	1	0	1,48
1971	0	716	3	0	0,09
1972	0	717	0	1	0,47
1973	0	717	0	1	0,68
1974	0	717	1	1	0,59
1975	0	717	2	1	0,47
1976	0	718	0	1	0,43
1977	0	718	1	1	0,48
1978	0	718	2	1	0,57
1979	0	719	0	0	0,32
1980	0	720	0	0	0,33
1981	0	721	0	1	0,76
1982	0	721	1	1	0,92
1983	0	722	0	0	0,43
1984	0	723	0	1	0,25
1985	0	723	1	1	0,29
1986	0	724	1	1	0,15
1987	0	724	1	1	0,24
1988	0	725	0	1	0,39
1989	0	726	0	1	0,25
1991	0	728	0	0	0,59
1992	0	729	0	1	0,87
1993	0	729	0	1	0,81
1994	0	730	0	1	0,33
1995	0	730	1	1	0,28
1996	0	730	2	1	0,34
1997	0	730	3	1	0,36
1998	0	730	4	1	0,3
1999	0	731	1	0	0,73
2000	0	732	0	0	0,33
2001	0	733	0	1	0,56
2002	0	734	0	0	0,37
2003	0	735	4	1	0,67
2004	0	735	4	1	0,76
2005	0	735	5	1	1,1
2006	0	735	6	1	0,6
2007	0	735	7	1	0,57
2008	0	735	8	1	0,5
2009	0	735	9	1	0,8
2010	0	736	0	0	0,35
2011	0	737	0	1	0,63
2012	0	737	1	1	0,4
2013	0	737	2	1	0,52
2014	0	738	0	0	0,15
2015	0	739	2	1
2016	0	739	4	1
2017	0	740	1	0	0,66
2018	0	740	2	0	0,73
[truncated: 589 more rows]
