# Supplementary material for: A novel haemocytometric COVID-19 prognostic score developed and validated in an observational multicentre European hospital-based study
Source: eLife journal article supplement (doi:10.7554/elife.63195), 2020-11-26
Supplement: supp [file elife-63195-supp-v1.zip › elife_poa_e63195_Figure_5_source_data_2.csv]

Figure 5 – source data file 2. Source data for trends of reactive monocytes as a percenrage of total monocyte count count over 14 days of hospitalisation in critical/fatal (CF) and non-critical (NC) patients
Filename	exclusion	Pat_ID	length_of_hospitalisation	Critical_or_Fatal	Re-Mono%M
1	0	1	0	1	0,974658869
2	0	1	2	1	1,954397394
3	0	1	2	1	11,15107914
4	0	1	3	1	20,70484581
5	0	1	4	1	26,63755459
6	0	1	15	1	0,844594595
7	0	2	0	0	1,420454545
8	0	2	1	0	1,98938992
9	0	2	2	0	0,521920668
10	0	2	3	0	0,537153089
11	0	2	4	0	0,661703888
12	0	2	6	0	0,623885918
13	0	3	0	1	9,824561404
14	0	3	1	1	6,875
15	0	3	1	1	41,42857143
16	0	3	2	1	21,73913043
17	0	3	3	1	40
18	0	3	4	1	60,63829787
19	0	3	4	1	42,98245614
20	0	3	5	1	33,33333333
21	0	3	6	1	17,45283019
22	0	3	7	1	16,93121693
23	0	3	8	1	10,47619048
24	0	3	9	1	4,842615012
25	0	3	10	1	4,308390023
26	0	3	11	1	3,861003861
27	0	3	12	1	1,96801968
28	0	3	13	1	2,07253886
29	0	4	0	1	8,670520231
30	0	4	1	1	4,926108374
31	0	4	1	1	7,638888889
32	0	4	2	1	1,948051948
33	0	4	3	1	3,191489362
34	0	4	4	1	1,659751037
35	0	4	5	1	2,448979592
36	0	4	6	1	10,07194245
37	0	4	7	1	1,968503937
38	0	4	8	1	14,06844106
39	0	4	9	1	6,157112527
40	0	4	10	1	3,767123288
41	0	4	10	1	4,475043029
42	0	4	11	1	2,335025381
43	0	4	12	1	1,880877743
44	0	4	13	1	0,952380952
45	0	4	14	1	1,1994003
46	0	5	0	0	1,242236025
47	0	5	1	0	0,527240773
48	0	6	0	0	2,61627907
49	0	6	2	0	2,18579235
50	0	6	3	0	4,668304668
51	0	6	5	0	3,168316832
52	0	7	0	0	3,358208955
53	0	7	2	0	5,647840532
54	0	7	3	0	5,976095618
55	0	7	4	0	3,663003663
56	0	7	5	0	3,416149068
57	0	7	6	0	1,072386059
58	0	8	1	0	0,877192982
59	0	9	0	0	1,25
60	0	9	2	0
61	0	9	3	0	0,528401585
62	0	9	4	0	0,84643289
63	0	9	5	0	1,843971631
64	0	9	7	0	0,442477876
65	0	10	0	1	0,37593985
66	0	10	1	1	1,153846154
67	0	10	3	1	12,93706294
68	0	10	4	1	7,975460123
69	0	11	0	0	3,682170543
70	0	11	1	0	6,512605042
71	0	11	3	0	2,721088435
72	0	12	0	1	0,840336134
73	0	12	2	1	2,756892231
74	0	13	5	1	0,85106383
75	0	13	6	1	1,03950104
76	0	13	7	1	1,181102362
77	0	13	8	1	0,448430493
78	0	13	9	1	1,606425703
79	0	13	9	1	0,961538462
80	0	13	10	1	0,596125186
81	0	13	11	1	0,206825233
82	0	13	12	1	0,255536627
83	0	13	13	1	0,729261623
84	0	14	1	0	0,725952813
85	0	15	13	1	0,324464633
86	0	15	14	1	0,620417372
87	0	15	15	1	0,325309044
88	0	15	16	1	0,319897633
89	0	15	17	1	0,622406639
90	0	15	18	1	0,397772474
91	0	15	19	1	0,410846343
92	0	15	20	1	0,265721878
93	0	16	11	1	5,374823197
94	0	16	12	1	3,104693141
95	0	16	13	1	1,309707242
96	0	16	14	1	2,19123506
97	0	16	15	1	1,07587769
98	0	16	16	1	2,731929425
99	0	16	17	1	3,115638107
100	0	16	18	1	1,076320939
101	0	16	19	1	0,961538462
102	0	17	1	0
103	0	17	2	0	0,873362445
104	0	17	4	0	0,947867299
105	0	18	0	1	2,826855124
106	0	18	2	1	10,17699115
107	0	18	2	1	23,80952381
108	0	18	3	1	17,79661017
109	0	18	4	1	19,2139738
110	0	19	0	1	5,333333333
111	0	19	1	1	3,240740741
112	0	19	3	1	4,813664596
113	0	20	0	0	4,081632653
114	0	20	1	0	14,66666667
115	0	20	3	0	4,467353952
116	0	21	0	1	14,93775934
117	0	22	0	0	1,750972763
118	0	23	0	0	2,083333333
119	0	24	0	0	5,829596413
120	0	25	0	1	31,74603175
121	0	26	0	0	0,892857143
122	0	27	0	0	0,319693095
123	0	28	0	0	1,285714286
124	0	29	0	0	8,783783784
125	0	30	0	1
126	0	30	4	1	15,45253863
127	0	31	0	0	8,928571429
128	0	32	0	1	7,916666667
129	0	33	0	1	1,089918256
130	0	34	0	1
131	0	35	0	0	4,594594595
132	0	36	0	1	0,943396226
133	0	37	0	0	0
134	0	38	0	1	28,84615385
135	0	39	0	0	4,668674699
136	0	40	0	0	1,166180758
137	0	41	0	0	0,833333333
138	0	42	0	0	2,985074627
139	0	43	0	0	13,63636364
140	0	44	0	0	1,744186047
141	0	45	0	1	3,757225434
142	0	45	1	1
143	0	45	1	1
144	0	45	2	1	3,636363636
145	0	45	3	1
146	0	45	4	1	8,409506399
147	0	45	5	1	2,106741573
148	0	45	5	1
149	0	45	6	1	0,777202073
150	0	45	6	1
151	0	45	7	1	2,141900937
152	0	45	7	1
153	0	45	8	1	1,44766147
154	0	45	9	1	1,397849462
155	0	45	10	1	1,042752868
156	0	45	11	1	1,352874859
157	0	45	12	1	1,449275362
158	0	45	13	1	3,250773994
159	0	45	14	1	3,547066849
160	0	45	15	1	1,53609831
161	0	45	16	1	1,215277778
162	0	45	17	1	1,444622793
163	0	45	18	1	0,621118012
164	0	45	19	1	1,5625
165	0	45	20	1	0,924855491
166	0	45	21	1	1,323529412
167	0	45	22	1	1,386748844
168	0	46	0	0	1,020408163
169	0	47	0	0	5,555555556
170	0	48	0	1	1,680672269
171	0	49	0	1
172	0	50	0	0	4,777070064
173	0	51	0	0	10,76388889
174	0	52	0	1	4,150943396
175	0	53	0	1	22,67657993
176	0	54	0	1	4,938271605
177	0	54	4	1	2,925531915
178	0	54	10	1	1,290322581
179	0	54	11	1	1,069518717
180	0	55	0	0	0,574712644
181	0	56	0	1	7,772020725
182	0	57	0	0	6,823027719
183	0	58	0	0	0
184	0	59	0	0	2,298850575
185	0	60	0	0	1,612903226
186	0	61	0	0	10,52631579
187	0	62	0	1	3,341902314
188	0	63	0	0	5,633802817
189	0	64	0	0	0,628930818
190	0	65	0	0
191	0	66	0	1	0,568181818
192	0	67	0	0
193	0	68	0	0	17,94871795
194	0	69	0	0	1,966292135
195	0	70	0	0	9,523809524
196	0	71	0	0	1,446280992
197	0	72	0	0	2,226720648
198	0	73	0	0	3,260869565
199	0	74	0	0	1,581027668
200	0	75	0	0	1,840490798
201	0	76	0	0
202	0	77	0	0	1,146131805
203	0	78	0	1	3,947368421
204	0	79	0	0	1,28440367
205	0	79	0	0
206	0	79	1	0
207	0	79	2	0
208	0	79	3	0	2,666666667
209	0	79	5	0	1,907356948
210	0	79	7	0
211	0	79	8	0	2,395209581
212	0	79	9	0
213	0	79	10	0	2,203856749
214	0	79	12	0	0,573613767
215	0	80	0	0	2,045454545
216	0	81	0	1	0,348432056
217	0	82	0	0	5,009276438
218	0	83	0	0	0,469483568
220	0	85	0	1	1,863354037
221	0	86	0	1	9,454545455
222	0	87	0	0	1,807228916
223	0	88	0	0	6,741573034
225	0	90	0	0	19,71153846
226	0	91	0	0	4,911591356
227	0	92	0	0	1,775147929
228	0	93	0	1	2,766798419
229	0	93	1	1
230	0	93	2	1	4,787234043
231	0	94	0	0	0,928074246
232	0	95	0	0	13,54401806
233	0	96	0	1	2,290076336
234	0	97	0	0	2,834008097
235	0	98	0	0	10,62992126
236	0	98	2	0	8,695652174
237	0	98	4	0
238	0	98	5	0
239	0	98	13	0	1,489361702
240	0	99	0	1	2,264150943
241	0	99	1	1	2,608695652
242	0	99	2	1
243	0	99	3	1
244	0	99	4	1
245	0	99	5	1
246	0	100	0	1	6,557377049
247	0	101	0	1	5,538461538
248	0	102	0	0	21,4953271
249	0	103	0	1	8,653846154
250	0	103	1	1	5,785123967
251	0	104	0	1	16,17647059
252	0	105	0	0	22,76422764
253	0	106	0	1	14,51612903
254	0	107	0	0	3,094777563
255	0	108	0	0	1,675977654
256	0	109	0	1	5,070422535
257	0	110	0	0	7,070707071
258	0	110	1	0
259	0	110	2	0
260	0	110	3	0
261	0	110	4	0
262	0	110	5	0
263	0	110	6	0
264	0	110	7	0
265	0	110	7	0
266	0	110	8	0	0,647249191
267	0	110	9	0	1,597444089
268	0	110	10	0	1,063829787
269	0	110	11	0	0,85106383
270	0	110	12	0	0,849858357
271	0	110	13	0	1,719197708
272	0	110	16	0	0,255754476
273	0	110	17	0	0,328947368
274	0	110	20	0	0,647249191
275	0	111	0	0	12,38938053
276	0	112	0	0	5,042016807
277	0	113	0	0	1,030927835
278	0	114	0	1	2,870813397
279	0	115	0	1	3,854389722
280	0	116	0	1	4,816955684
281	0	117	0	0	0,261437908
282	0	118	0	1	37,5
283	0	119	0	1	4,429783223
284	0	120	0	1	9,756097561
285	0	121	0	1	0,379506641
286	0	122	0	0	1,008403361
287	0	122	4	0
288	0	122	7	0
289	0	122	9	0
290	0	123	0	1	8,133971292
291	0	124	0	0	5,529953917
292	0	125	0	0	3,576751118
293	0	126	0	1	19,56521739
294	0	126	2	1	10,89108911
295	0	127	0	0	0,391389432
296	0	127	4	0	2,734375
297	0	128	0	1	7,672634271
298	0	129	0	0	2,173913043
299	0	130	0	1	2,167182663
300	0	131	0	1	14,14634146
301	0	132	0	1	4,149377593
302	0	133	0	1	0
303	0	134	0	1	10,38961039
304	0	134	2	1	17,20930233
305	0	134	3	1	29,35323383
306	0	135	0	0	7,2
307	0	136	0	0	8,974358974
308	0	136	5	0	23,42857143
309	0	136	7	0	3,846153846
310	0	136	8	0
311	0	136	9	0	4,276315789
312	0	136	10	0	1,488833747
313	0	136	11	0	1,084598698
314	0	136	12	0	1,639344262
315	0	136	13	0	0,583090379
316	0	136	14	0	0,980392157
317	0	137	0	1	14,24050633
318	0	137	1	1	13,08016878
319	0	137	2	1
320	0	137	4	1	10,10638298
321	0	138	0	0	4,504504505
322	0	139	0	0	6,603773585
323	0	140	0	0	1,432664756
324	0	140	2	0	1,680672269
325	0	140	6	0	3,696098563
326	0	141	0	0	0,320512821
327	0	142	0	1	6,727828746
328	0	143	0	1	3,220338983
329	0	144	0	0	0,823045267
330	0	145	0	0	2,693602694
331	0	146	0	0	1,78041543
332	0	147	0	1	7,924528302
333	0	148	0	1	31,65467626
334	0	149	0	0	5,284552846
335	0	150	0	1	10,40462428
336	0	151	0	1	2,147239264
337	0	152	0	0	0,5
338	0	153	0	0	2,909647779
339	0	154	0	0	3,037974684
340	0	155	0	0	4,126213592
341	0	156	0	0	5,076142132
342	0	157	0	1	1,972386588
343	0	158	0	0	3,27510917
344	0	159	0	0	3,75
345	0	160	0	0	0,191570881
346	0	161	0	1	0,56022409
347	0	162	0	1	3,533568905
348	0	163	0	0	4,639175258
349	0	164	0	1	11,62790698
350	0	165	0	1	0,810810811
351	0	166	0	1	10,79691517
352	0	167	0	0	2,81124498
353	0	168	0	0	2,139037433
355	0	170	0	0	2,428256071
356	0	171	0	0	1,300108342
357	0	172	0	0	0,804597701
358	0	173	0	1	22,406639
359	0	174	0	0	4,798962387
360	0	175	0	1	3,703703704
361	0	176	0	0	1,38121547
362	0	177	0	0	2,34375
363	0	178	0	1	3,178484108
364	0	179	0	0	6,965174129
365	0	179	2	0
366	0	179	3	0
367	0	179	5	0	2,097902098
368	0	179	6	0
369	0	179	6	0
370	0	179	7	0
371	0	179	8	0
372	0	179	9	0	0,305810398
373	0	179	10	0	0,451977401
374	0	179	11	0
375	0	179	12	0	0,566037736
376	0	179	13	0
377	0	179	14	0	0,140252454
378	0	179	15	0
379	0	179	16	0	0,348675035
380	0	180	0	1	1,495726496
381	0	181	0	0	2,801724138
382	0	182	0	0	0,753498385
383	0	183	0	0	5,555555556
384	0	184	0	0	8,722741433
385	0	185	0	0	8,064516129
386	0	186	0	1	3,056768559
387	0	187	0	0	0,732600733
388	0	188	0	1	5,472636816
389	0	189	0	1	17,61006289
390	0	189	2	1
391	0	189	4	1	12,32876712
392	0	190	0	0	0,470957614
393	0	191	0	0	11,36363636
394	0	192	0	0	5,555555556
395	0	193	0	0	2,074688797
396	0	194	0	1	6,031746032
397	0	195	0	0	2,567760342
398	0	196	0	1	1,552393273
399	0	197	0	0	14,67391304
400	0	198	0	0	0,345303867
401	0	199	0	1	8
402	0	200	0	1	1,748251748
403	0	201	0	1	0,408163265
404	0	202	0	1	1,587301587
405	0	203	0	1	6,718346253
406	0	204	0	0	4,964539007
407	0	205	0	0	4,849884527
408	0	206	0	0	0
409	0	207	0	0	14
410	0	208	0	1	33,33333333
411	0	209	0	0	5,83090379
412	0	210	0	1	6,474820144
413	0	211	0	0	16,22911695
414	0	212	0	1	0,276243094
415	0	213	0	1	2,01511335
416	0	214	0	1	1,096491228
417	0	215	0	1	1,535836177
418	0	216	0	0	4,90797546
419	0	216	2	0	8,780487805
420	0	216	3	0
421	0	216	4	0	9,446254072
422	0	216	6	0
423	0	216	7	0
424	0	216	9	0	1,138952164
425	0	217	0	1	4,887218045
426	0	217	3	1	22,22222222
427	0	217	5	1	16,12903226
428	0	217	7	1
429	0	218	0	0	2,481389578
430	0	219	0	0	5,306122449
431	0	220	0	1	3,711790393
432	0	221	0	0	33,14606742
433	0	222	0	0	8,950617284
434	0	223	0	1	3,205128205
435	0	224	0	1	1,327433628
436	0	225	0	1	12,80193237
437	0	226	0	0	1,325757576
438	0	227	0	0	2,56
439	0	228	0	0	1,556420233
440	0	229	0	0	0,76142132
441	0	230	0	0	2,649006623
442	0	231	0	1	18,75
443	0	232	0	0	1,234567901
444	0	233	0	0	2,263374486
445	0	234	0	0	2,620087336
446	0	235	0	0	7,669616519
447	0	236	0	0	4,219409283
448	0	237	1	1	0,716845878
449	0	237	1	1	0,576368876
450	0	237	1	1	1,408450704
451	0	237	2	1	6
452	0	237	3	1	6,024096386
453	0	237	4	1	29,31034483
454	0	237	5	1	48,10126582
455	0	238	11	1	9,197080292
456	0	238	12	1	8,823529412
457	0	238	13	1	3,497942387
458	0	238	14	1	2,262931034
459	0	238	15	1	1,297169811
460	0	238	16	1	0,630252101
461	0	239	0	0	1,26984127
462	0	240	1	0	5,555555556
463	0	240	3	0	4,661016949
464	0	240	4	0	2,302631579
465	0	241	0	1	11,18012422
466	0	241	0	1	9,826589595
467	0	241	1	1	11,76470588
468	0	241	2	1	7,473309609
469	0	241	2	1	9,309309309
470	0	241	3	1	7,530120482
471	0	241	4	1	4,438642298
472	0	241	5	1	1,54185022
473	0	241	5	1	3,225806452
474	0	241	6	1	1,967799642
475	0	242	0	1	1,960784314
476	0	242	1	1	5,349794239
477	0	242	1	1	3,111111111
478	0	242	1	1	3,779069767
479	0	242	2	1	7,462686567
480	0	242	2	1	6,698564593
481	0	243	8	1	0,904977376
482	0	243	9	1	3,59375
483	0	243	9	1	1,492537313
484	0	243	10	1	4,071661238
485	0	243	11	1	2,321981424
486	0	244	2	0	3,894080997
487	0	244	6	0	0,661157025
488	0	245	2	1	3,768115942
489	0	246	0	0	4,093567251
490	0	246	2	0	2,694610778
491	0	247	2	0	3,614457831
492	0	247	4	0	0,607902736
493	0	247	5	0	1,215805471
494	0	247	6	0	0,70323488
495	0	248	1	0	5,102040816
496	0	248	2	0	8,24742268
497	0	248	3	0	2,916666667
498	0	248	4	0	5,090909091
499	0	249	2	1	15,46052632
500	0	249	3	1	20,68965517
501	0	249	3	1	17,74193548
502	0	249	4	1	32,09876543
503	0	249	4	1	25
504	0	249	4	1	14,39393939
505	0	249	5	1	20,96069869
506	0	249	6	1	10,90909091
507	0	249	7	1	6,25
508	0	250	2	0	1,76565008
509	0	250	5	0	1,041666667
510	0	250	6	0	1,021566402
511	0	251	2	0	0,099800399
512	0	251	3	0	1,202185792
513	0	251	5	0	1,376146789
514	0	252	7	1	1,038062284
515	0	252	8	1	0,501253133
516	0	252	9	1	0,630914826
517	0	252	10	1	0,841219769
518	0	252	11	1	0,684931507
519	0	252	12	1	0,079051383
520	0	253	6	1	4,424778761
521	0	253	7	1	1,777777778
522	0	253	7	1	3,603603604
523	0	253	7	1	4,651162791
524	0	253	7	1	7,027027027
525	0	253	8	1	0,99009901
526	0	253	9	1	4,735376045
527	0	254	6	1	0,702576112
528	0	255	6	0	7,191011236
529	0	255	7	0	3,93081761
530	0	255	8	0	2,083333333
531	0	255	9	0	4,914933837
532	0	255	10	0	2,18579235
533	0	256	1	0	19,14893617
534	0	256	2	0	18,24817518
535	0	257	1	1	4,158004158
536	0	257	3	1	4,789550073
537	0	257	4	1	2,874432678
538	0	257	5	1	2,91858679
539	0	258	2	0	0,838926174
540	0	258	3	0	0,936037441
541	0	259	7	0	4,439252336
542	0	259	8	0	6,824146982
543	0	260	0	1	0,73964497
544	0	260	2	1	1,308900524
545	0	260	4	1	0,289017341
546	0	260	5	1	1,059322034
547	0	260	6	1	0,387596899
548	0	261	6	1	6,086956522
549	0	261	7	1	16,52360515
550	0	261	8	1	6,398537477
551	0	261	9	1	5,843071786
552	0	261	11	1	3,878583474
553	0	261	12	1	2,397260274
554	0	261	12	1	4,149377593
555	0	262	2	0	19,33701657
556	0	262	4	0	11,53846154
557	0	262	5	0	13,1147541
558	0	262	6	0	6,25
559	0	262	7	0	4,358353511
560	0	263	7	0	3,790087464
561	0	263	11	0	0,823045267
562	0	263	12	0	2,140672783
563	0	264	3	0	3,111111111
564	0	264	4	0	1
565	0	264	5	0	0,704225352
566	0	264	7	0	1
567	0	265	0	1	0,99009901
568	0	265	1	1	7,058823529
569	0	265	2	1	9,090909091
570	0	266	0	1	5,405405405
571	0	266	4	1	20,30769231
572	0	266	5	1	20,92457421
573	0	266	6	1	19,83471074
574	0	266	7	1	15,40740741
575	0	267	0	0	2,476780186
576	0	267	2	0	1,542416452
577	0	268	2	1	3,754940711
578	0	268	2	1	3,791469194
579	0	268	3	1	4,967948718
580	0	268	3	1	5,217391304
581	0	269	4	0	0,223546945
582	0	270	3	1	4,292929293
583	0	270	4	1	3,68
584	0	270	5	1	6,498951782
585	0	271	7	1	1,375515818
586	0	271	8	1	2,303030303
587	0	271	9	1	2,887139108
588	0	271	9	1	1,424870466
589	0	272	0	0	0,753295669
590	0	272	2	0	5,973451327
591	0	272	5	0	2,208201893
592	0	273	0	0	3,125
593	0	274	1	0	3,305785124
594	0	274	3	0	8,928571429
595	0	274	4	0	11,66666667
596	0	275	2	1	11,31221719
597	0	275	3	1	11,70731707
598	0	275	4	1	11,32075472
599	0	275	5	1	3,921568627
600	0	275	6	1	1,529051988
601	0	275	7	1	1,458333333
602	0	276	6	0	1,19047619
603	0	276	8	0	3,184713376
604	0	276	9	0	4,780876494
605	0	277	2	0	2,830188679
606	0	277	4	0	3,396226415
607	0	277	6	0	1,075268817
608	0	277	7	0	1,254705144
609	0	278	2	0	2,259332024
610	0	278	3	0	1,183431953
611	0	278	4	0	0,818330606
612	0	279	0	0	14,28571429
613	0	279	2	0	23,57142857
614	0	279	6	0	19,80676329
615	0	279	9	0	19,42446043
616	0	280	0	0	0,74906367
617	0	281	16	1	1,125401929
618	0	282	5	0	1,423027167
619	0	283	1	1	0,483870968
620	0	284	4	0	1,121794872
621	0	284	5	0	1,147540984
622	0	284	6	0	1,19205298
623	0	284	7	0	0,599400599
624	0	285	1	0	5,514705882
625	0	285	3	0	2,504816956
626	0	285	4	0	1,672862454
627	0	286	0	0	1,221640489
628	0	286	2	0	1,162790698
629	0	286	3	0	1,684717208
630	0	286	5	0	1,089918256
631	0	287	4	0	1,602564103
632	0	287	6	0	1,33037694
633	0	288	7	1	1,192842942
634	0	288	8	1	2,568807339
635	0	288	8	1	2,78372591
636	0	288	9	1	0,508905852
637	0	288	9	1	1,573033708
638	0	288	9	1	1,01910828
639	0	288	9	1	0,651465798
640	0	288	10	1	3,163950144
641	0	288	11	1	1,425178147
642	0	288	11	1	1,016518424
643	0	288	11	1	1,253481894
644	0	289	2	0	1,515151515
645	0	290	2	0	1,773533424
646	0	290	4	0	2,492668622
647	0	290	6	0	1,314217443
648	0	291	2	0	0,473036897
649	0	291	4	0	0,397614314
650	0	291	6	0	0,190657769
651	0	292	3	1	4,851752022
652	0	292	4	1	6,393442623
653	0	292	5	1	3,653846154
654	0	293	15	0	4,926108374
655	0	293	17	0	1,777777778
656	0	294	4	0	2,083333333
657	0	294	6	0	3,0651341
658	0	294	7	0	2,298850575
659	0	295	25	1	2,886836028
660	0	296	3	0	1,549295775
661	0	296	4	0	0,892857143
662	0	297	2	0	3,594771242
663	0	297	4	0	0,814663951
664	0	298	0	0	1,298701299
665	0	298	2	0	3,081232493
666	0	298	3	0	3,43980344
667	0	298	4	0	5,263157895
668	0	298	5	0	3,278688525
669	0	299	3	0	1,890359168
670	0	299	5	0	1,403508772
671	0	299	7	0	0,770712909
672	0	300	2	0	2,325581395
673	0	300	3	0	1,423487544
674	0	300	4	0	0,36900369
675	0	300	6	0	2,672605791
676	0	301	0	0	2,162162162
677	0	301	9	0	3,846153846
678	0	301	12	0	4,261363636
679	0	302	2	0	5,426356589
680	0	302	3	0	3,676470588
681	0	302	4	0	3,358208955
682	0	303	2	0	1,395348837
683	0	304	2	0	15,89958159
684	0	305	3	0	21,47239264
685	0	305	4	0	8,571428571
686	0	306	1	0	1,935483871
687	0	307	1	1	2,575757576
688	0	307	3	1	1,851851852
689	0	307	4	1	2,721088435
690	0	308	1	1	2,150537634
691	0	308	2	1	13,73390558
692	0	309	1	1	0,943396226
693	0	309	2	1	2,097902098
694	0	309	3	1	0,230946882
695	0	309	3	1	0,228832952
696	0	309	4	1	0,428265525
697	0	310	1	0	15,01976285
698	0	310	3	0	2,322738386
699	0	310	4	0	2,031602709
700	0	311	2	0	3,410341034
701	0	311	3	0	2,003816794
702	0	311	4	0	1,091901729
703	0	312	2	0	15,19607843
704	0	312	3	0	12,10762332
705	0	313	2	0	1,360544218
706	0	313	3	0	4,249291785
707	0	313	4	0	7,984790875
708	0	314	2	0	0,654450262
709	0	314	3	0	1,298701299
710	0	314	4	0	0,740740741
711	0	315	2	1	13,35227273
712	0	316	2	0	5,172413793
715	0	318	1	0	11,17318436
716	0	318	2	0	16,27906977
717	0	318	4	0	35,41666667
718	0	318	7	0	27,39726027
719	0	318	9	0	8,582089552
720	0	319	2	1	13,02083333
721	0	319	3	1	4,205607477
722	0	319	4	1	5,866302865
723	0	319	5	1	2,76816609
724	0	319	6	1	1,214128035
725	0	319	9	1	0,723763571
726	0	319	10	1	0,664010624
727	0	319	11	1	0,841346154
728	0	319	12	1	0,612661675
729	0	319	13	1	0,832177531
730	0	320	0	1	1,27388535
731	0	321	0	0	13,52459016
732	0	321	3	0	4,19047619
733	0	322	0	0	0,488997555
734	0	322	1	0	2,093023256
735	0	323	0	0	2,694610778
736	0	323	4	0	11,70886076
737	0	324	3	0	5,929919137
738	0	325	2	0	8,148148148
739	0	326	0	1	9,117647059
740	0	326	1	1	9,283819629
741	0	326	2	1	22,89719626
742	0	326	3	1	22,70531401
743	0	326	4	1	9,666666667
744	0	327	1	0	5,836575875
745	0	328	2	1	5,429864253
746	0	328	3	1	10,26438569
747	0	329	0	0	0,894632207
748	0	329	1	0	1,147396293
749	0	329	2	0	0,883002208
750	0	329	3	0	2,527075812
751	0	330	0	0	5,315614618
752	0	331	8	1	48,60335196
753	0	331	9	1	16,25
754	0	331	10	1	14,63414634
755	0	331	11	1	7,051282051
756	0	331	14	1	4,289544236
757	0	331	15	1	2,88248337
758	0	331	16	1	1,829268293
759	0	331	17	1	1,206434316
760	0	331	18	1	0,356718193
761	0	332	0	1	0,19047619
762	0	332	0	1	0,088731145
763	0	333	5	1	2,931596091
764	0	333	6	1	2,336448598
765	0	333	7	1	2,874743326
766	0	334	2	0	0,50547599
767	0	334	3	0	0,431034483
768	0	335	10	1	1,10619469
769	0	335	11	1	0,22172949
770	0	335	12	1	0,642673522
771	0	335	13	1	0,287356322
772	0	335	14	1	0,497512438
773	0	335	19	1	0,970873786
774	0	335	20	1	0,253807107
775	0	335	21	1	0,250626566
776	0	336	1	1	1,97044335
777	0	337	0	0	2,727272727
778	0	338	3	0	1,883239171
779	0	339	0	0	2,412868633
780	0	340	0	0	0,864553314
781	0	341	9	1	1,693002257
782	0	341	12	1	0,73664825
783	0	341	13	1	0,684150513
784	0	341	14	1	0,694444444
785	0	341	15	1	0,444938821
786	0	341	16	1	0,651041667
787	0	341	21	1	0,790513834
788	0	341	22	1	1,020408163
789	0	341	23	1	0,645855759
790	0	342	0	0	1,37254902
791	0	343	3	0	12,5
792	0	344	0	0	0,100401606
793	0	345	2	1	13,32007952
794	0	346	0	0	1,646090535
795	0	346	3	0	16,59192825
796	0	347	10	0	6,724137931
797	0	347	11	0	3,95480226
798	0	348	3	1	8,620689655
799	0	348	6	1	34
800	0	349	4	1	5,555555556
801	0	349	4	1	6,220095694
802	0	349	5	1	4,789272031
803	0	349	6	1	6,890130354
804	0	349	7	1	3,800475059
805	0	349	12	1	1,235741445
806	0	349	13	1	0,667779633
807	0	349	14	1	1,421800948
808	0	349	15	1	0,746268657
809	0	350	5	1	5,067567568
810	0	350	8	1	2,604166667
811	0	350	9	1	1,754385965
812	0	350	10	1	2,13371266
813	0	350	11	1	0,769230769
814	0	350	12	1	0,373599004
815	0	350	17	1	1,570680628
816	0	350	18	1	1,973684211
817	0	350	19	1	0,995732575
818	0	351	5	0	4,081632653
819	0	352	0	0	3,636363636
820	0	352	2	0	2,857142857
821	0	353	2	1	16,04938272
822	0	353	3	1	13,76146789
823	0	353	4	1	14,63414634
824	0	354	3	0	2,835051546
825	0	355	1	1	8,223684211
826	0	355	5	1	5,241935484
827	0	355	6	1	3,074141049
828	0	355	7	1	3,549382716
829	0	355	8	1	1,751592357
830	0	355	11	1	1,860465116
831	0	355	12	1	1,021355617
832	0	355	13	1	1,394422311
833	0	355	14	1	0,669856459
834	0	355	15	1	1,385390428
835	0	356	2	1	10
836	0	356	5	1	6,545454545
837	0	356	6	1	3,875968992
838	0	356	7	1	5,647058824
839	0	356	8	1	2,013422819
840	0	356	9	1	1,706484642
841	0	356	12	1	0,913242009
842	0	356	13	1	1,071428571
843	0	356	14	1	0,446428571
844	0	356	15	1	0,898203593
845	0	356	16	1	0,374882849
846	0	357	0	0	0,831600832
847	0	358	0	0	1,831501832
848	0	359	1	0	6,309148265
849	0	359	3	0	3,143418468
850	0	359	9	0	0,664451827
851	0	360	1	1	5,442176871
852	0	360	2	1	10,63829787
853	0	360	3	1	11,36363636
854	0	360	4	1	6,470588235
855	0	360	7	1	2,946593002
856	0	360	8	1	1,238390093
857	0	360	9	1	1,198630137
858	0	360	10	1	2,414772727
859	0	360	10	1	1,449275362
860	0	360	11	1	2,230483271
861	0	361	1	1	3,325415677
862	0	361	2	1	6,862745098
863	0	361	9	1	1,372997712
864	0	361	10	1	1,744186047
865	0	361	11	1	0,950118765
866	0	362	0	0	0,388349515
867	0	363	2	0	2,651515152
868	0	364	4	0	5,280528053
869	0	364	6	0	1,677852349
870	0	365	0	0	1,006036217
871	0	365	5	0	4,004004004
872	0	365	6	0	2,450980392
873	0	365	7	0	1,689545935
874	0	365	8	0	2,480916031
875	0	365	9	0	0,597609562
876	0	366	3	0	6
877	0	367	0	0	5,021834061
878	0	367	2	0	6,639839034
879	0	368	10	1	0,779727096
880	0	369	3	0	2,75
881	0	369	5	0	3,571428571
882	0	369	8	0	0,959692898
883	0	370	0	0	1,072386059
884	0	371	0	0	0,600600601
885	0	372	5	0	6,12244898
886	0	373	0	0	1,391650099
887	0	374	0	0	1,050420168
888	0	375	0	0	1,730103806
889	0	375	2	0	8,542713568
890	0	375	6	0	3,835616438
891	0	376	0	0	3,220035778
892	0	376	0	0	1,93236715
893	0	377	0	1	10,43165468
894	0	377	1	1	24,50331126
895	0	377	2	1	44,05797101
896	0	377	5	1	10,31613977
897	0	377	6	1	4,347826087
898	0	377	7	1	1,824817518
899	0	377	8	1	2,493074792
900	0	377	9	1	3,120124805
901	0	378	0	1	9,389671362
902	0	378	2	1	14,50381679
903	0	378	3	1	20,53941909
904	0	378	6	1	3,689687796
905	0	378	7	1	5,047619048
906	0	378	8	1	4,714415231
907	0	378	9	1	3,565640194
908	0	378	10	1	2,22504768
909	0	379	0	0	2,732240437
910	0	380	0	0	1,090909091
911	0	381	2	0	3,486238532
912	0	382	2	1	10,44776119
913	0	383	4	0	19,92619926
914	0	384	1	1	5,144032922
915	0	384	2	1	4,105090312
916	0	384	5	1	1,218161683
917	0	384	6	1	1,671732523
918	0	384	7	1	1,02915952
919	0	384	8	1	0,875273523
920	0	384	8	1	0,232018561
921	0	385	1	1	3,533190578
922	0	386	0	0	1,622418879
923	0	386	1	0	1,36286201
924	0	387	4	0	6,153846154
925	0	388	1	0	1,264488936
926	0	389	2	0	15,89147287
927	0	389	6	0	7,783417936
928	0	390	2	0	24,85207101
929	0	390	6	0	9,016393443
930	0	390	10	0	1,394422311
931	0	391	0	1	2,582159624
932	0	392	2	1	10,76923077
933	0	392	5	1	5,383022774
934	0	393	5	0	1,492537313
935	0	394	2	0	3,888888889
936	0	395	2	0	2,649006623
937	0	396	2	0	1,947308133
938	0	397	2	0	2,624671916
939	0	397	5	0	2,626641651
940	0	398	6	0	0,744047619
941	0	399	2	0	4,08388521
942	0	400	0	0	0,84317032
943	0	400	1	0	2,005730659
944	0	400	4	0	19,41391941
945	0	401	4	1	23,39449541
946	0	401	5	1	9,803921569
947	0	401	6	1	7,102803738
948	0	401	7	1	4,87804878
949	0	401	8	1	6,770098731
950	0	402	3	0	11,74863388
951	0	403	2	0	4,006410256
952	0	404	2	0	20,08547009
953	0	405	2	1	2,188183807
954	0	405	5	1	7
955	0	405	5	1	10
956	0	405	6	1	13,27433628
957	0	406	0	1	5,182926829
958	0	406	2	1	15,16853933
959	0	406	3	1	10,26490066
960	0	406	4	1	10,67615658
961	0	407	2	0	0,362318841
962	0	407	6	0	11,9205298
963	0	407	7	0	8,571428571
964	0	407	9	0	4,519774011
965	0	407	13	0	3,984063745
966	0	408	0	0	1,851851852
967	0	408	3	0	3,418803419
968	0	409	2	0	7,142857143
969	0	409	5	0	4,200542005
970	0	410	0	0	6,930693069
971	0	410	2	0	3,438395415
972	0	411	0	0	2,247191011
973	0	412	2	1	0,980392157
974	0	412	5	1	11,80555556
975	0	412	6	1	24,05660377
976	0	413	0	1	1,282051282
977	0	413	3	1	18,18181818
978	0	413	4	1	19,04761905
979	0	413	5	1	9,843400447
980	0	413	6	1	6,921675774
981	0	413	7	1	4,769475358
982	0	414	1	0	4,680851064
983	0	415	1	0	0,881057269
984	0	416	0	0	1,917808219
985	0	416	1	0	2,788844622
986	0	417	0	0	1,404494382
987	0	417	1	0	0,796359499
988	0	417	2	0	1,376720901
989	0	417	4	0	0,588235294
990	0	417	7	0	0,663716814
991	0	417	9	0	0,815217391
992	0	418	13	0	4,935064935
993	0	418	14	0	4,424778761
994	0	418	17	0	14,9122807
995	0	418	18	0	9,274193548
996	0	418	19	0	6,705539359
997	0	418	21	0	2,909090909
998	0	418	24	0	0,715990453
999	0	418	26	0	2,686202686
1000	0	419	0	0	0,457665904
1001	0	419	2	0	2,03562341
1002	0	419	3	0	0,907029478
1003	0	420	0	1	1,360544218
1004	0	420	1	1	8,75
1005	0	421	0	1	26,20481928
1006	0	421	0	1	27,54716981
1007	0	422	0	1	2,694610778
1008	0	422	1	1	2,684563758
1009	0	422	2	1	0,784313725
1010	0	423	0	1	3,459119497
1011	0	423	2	1	7,185628743
1012	0	423	4	1	4,08719346
1013	0	424	0	0	6,606606607
1014	0	424	1	0	12,30769231
1015	0	424	5	0	1,216545012
1016	0	424	7	0	0,928074246
1017	0	425	12	1	46,9273743
1018	0	426	0	1	1,470588235
1019	0	427	0	1	5,063291139
1020	0	427	1	1	9,395973154
1021	0	428	0	0	5,882352941
1022	0	428	3	0	3,375527426
1023	0	428	4	0	4,377104377
1024	0	428	6	0	7,446808511
1025	0	429	0	1	1,733102253
1026	0	429	1	1	3,676470588
1027	0	429	2	1	7,331378299
1028	0	429	5	1	12,62135922
1029	0	429	8	1	1,949317739
1030	0	429	11	1	4,458598726
1031	0	430	1	1	17,81609195
1032	0	431	0	0	0,210084034
1033	0	432	0	0	1,370967742
1034	0	432	1	0	5,919395466
1035	0	432	3	0	1,03950104
1036	0	433	0	0	1,240310078
1037	0	433	1	0	1,654411765
1038	0	433	2	0	1,488095238
1039	0	434	0	0	6,25
1040	0	434	1	0	4,046242775
1041	0	434	3	0	3,255813953
1042	0	434	5	0	2,830188679
1043	0	434	7	0	0,805152979
1044	0	435	8	0	4,020100503
1045	0	435	11	0	0,347222222
1046	0	436	0	1	0,862068966
1047	0	437	0	1	3,764705882
1048	0	437	2	1	4,246575342
1049	0	438	0	0	1,803607214
1050	0	438	2	0	1
1051	0	438	4	0	1,366120219
1052	0	439	0	1	2,127659574
1053	0	439	2	1	1,651651652
1054	0	440	2	0	0,262467192
1055	0	441	0	0	3,293413174
1056	0	441	1	0	1,744186047
1057	0	441	3	0	1,904761905
1058	0	442	0	1	2,118644068
1059	0	442	1	1	3,300970874
1060	0	442	2	1	7,720588235
1061	0	442	3	1	2,580645161
1062	0	442	6	1	3,941605839
1063	0	443	0	1	0,699300699
1064	0	443	2	1	7,954545455
1065	0	443	4	1	14,18439716
1066	0	443	5	1	2,688172043
1067	0	444	0	1	1,946902655
1068	0	444	1	1	1,582278481
1069	0	445	0	0	4,316546763
1070	0	445	1	0	8,411214953
1071	0	445	6	0	4,149377593
1072	0	445	8	0	2,29226361
1073	0	445	10	0	1,256281407
1074	0	445	13	0	1,428571429
1075	0	446	2	1	1,5625
1076	0	446	6	1	5,970149254
1077	0	446	8	1	1,66163142
1078	0	446	11	1	1,111111111
1079	0	446	18	1	1,235955056
1080	0	446	20	1	1,317122594
1081	0	447	1	0	14,96062992
1082	0	447	3	0	5,639097744
1083	0	447	6	0	1,597444089
1084	0	447	8	0	1,041666667
1085	0	447	10	0	0,842696629
1086	0	447	13	0	0,242718447
1087	0	448	0	0	0,609756098
1088	0	448	2	0	0,695652174
1089	0	449	0	0	2,208201893
1090	0	449	1	0	8,754208754
1091	0	449	4	0	2,697095436
1092	0	449	6	0	0,681044268
1093	0	449	8	0	0,476947536
1094	0	450	0	0	2,898550725
1095	0	450	2	0	9,016393443
1096	0	450	3	0	2,008032129
1097	0	450	5	0	1,025641026
1098	0	451	0	0	1,095890411
1099	0	452	0	1	0,604229607
1100	0	453	0	1	0,790513834
1101	0	453	4	1	5,286343612
1102	0	453	6	1	5,818181818
1103	0	453	8	1	6,018518519
1104	0	454	7	0	1,694915254
1105	0	454	10	0	0,785854617
1106	0	455	0	1	0,99009901
1107	0	455	2	1	0,835073069
1108	0	455	4	1	0,825471698
1109	0	456	0	0	12
1110	0	456	4	0	2,262443439
1111	0	457	1	0	3,474903475
1112	0	457	3	0	3,829787234
1113	0	457	5	0	5,487804878
1114	0	457	8	0	1,746724891
1115	0	457	10	0	0,512820513
1116	0	457	12	0	0,635930048
1117	0	458	0	0	2,211302211
1118	0	458	1	0	1,856148492
1119	0	459	0	1	6,913996627
1120	0	460	0	1	0,911854103
1121	0	460	2	1	4,697986577
1122	0	461	0	0	3,601108033
1123	0	461	3	0	3,663003663
1124	0	462	1	0	4,013377926
1125	0	463	0	1	2,475247525
1126	0	464	0	0	3,003533569
1127	0	464	1	0	1,785714286
1128	0	464	3	0	1,180438449
1129	0	465	0	0	0,723327306
1130	0	465	3	0	0,957854406
1131	0	466	0	0	5,576208178
1132	0	467	0	0	3,365384615
1133	0	468	0	1	1,280788177
1134	0	468	1	1	0,7960199
1135	0	469	0	0	7,658643326
1136	0	469	1	0	15,83710407
1137	0	470	0	0	0,753295669
1138	0	471	0	0	1,567944251
1139	0	471	1	0	2,123552124
1140	0	471	4	0	3,393213573
1141	0	472	0	1	0,579150579
1143	0	472	11	1	0
1144	0	472	13	1	0,344234079
1145	0	473	0	1	0,462962963
1146	0	473	1	1	2,450229709
1147	0	473	3	1	5
1148	0	474	3	0	0,435729847
1149	0	474	5	0	1,818181818
1150	0	475	0	1	1,287553648
1151	0	476	0	0	4,843304843
1152	0	476	1	0	4,392764858
1153	0	477	0	1	3,476482618
1154	0	477	4	1	2,192982456
1155	0	477	6	1	6,134969325
1156	0	477	8	1	3,571428571
1157	0	477	10	1	0,733496333
1158	0	478	0	0	0,859598854
1159	0	478	1	0	1,851851852
1160	0	478	4	0	1,290322581
1161	0	479	0	0	17
1162	0	479	2	0	10,90909091
1163	0	479	4	0	16,12903226
1164	0	479	7	0	3,755868545
1165	0	480	0	0	2,876480541
1166	0	480	1	0	6,951871658
1167	0	480	4	0	2,764227642
1168	0	480	6	0	2,688172043
1169	0	481	0	0	11,38613861
1170	0	482	0	0	8,59375
1171	0	483	2	1	2,375296912
1172	0	484	0	0	2,226345083
1173	0	484	1	0	2,380952381
1174	0	485	0	0	1,196581197
1175	0	485	2	0	2,156862745
1176	0	485	5	0	0,525624179
1177	0	485	7	0	0,611995104
1178	0	485	9	0	0,706713781
1179	0	486	0	0	4,230769231
1180	0	486	3	0	3,793103448
1181	0	487	0	1	0,449775112
1182	0	487	1	1	0,959692898
1183	0	487	3	1	0,555555556
1184	0	487	5	1	1,552795031
1185	0	488	0	1	0,348432056
1186	0	488	2	1	10,75268817
1187	0	488	4	1	2,222222222
1188	0	488	7	1	12,5
1189	0	489	0	0	1,046337818
1190	0	489	4	0	0,725952813
1191	0	490	4	0	1,179941003
1192	0	490	7	0	0,904159132
1193	0	491	1	1	2,005730659
1194	0	491	2	1	3,703703704
1195	0	491	3	1	2,605863192
1196	0	491	6	1	1,628664495
1197	0	491	8	1	0,240963855
1198	0	491	10	1	1,851851852
1199	0	492	0	0	1,016949153
1200	0	492	1	0	0,629425649
1201	0	493	0	0	1,766004415
1202	0	493	1	0	4,326923077
1203	0	494	0	0	5,313092979
1204	0	494	2	0	2,256699577
1205	0	494	3	0	2,773497689
1206	0	495	0	1	3,448275862
1207	0	495	2	1	2,07253886
1208	0	495	4	1	0,943396226
1209	0	495	6	1	1,171875
1210	0	495	6	1	0,955414013
1211	0	495	7	1	0,854700855
1212	0	496	0	1	1,990049751
1213	0	496	1	1	5,166051661
1214	0	497	9	1	1,008403361
1215	0	497	12	1	0,240963855
1216	0	498	0	0	4,336734694
1217	0	498	1	0	3,456790123
1218	0	498	3	0	1,091703057
1219	0	498	5	0	0,517241379
1220	0	499	0	0	7,748184019
1221	0	500	0	1	3,937007874
1222	0	500	1	1	7,076923077
1223	0	500	2	1	5,372616984
1224	0	500	4	1	1,884570082
1225	0	500	7	1	1,696832579
1226	0	500	9	1	0,383141762
1227	0	501	0	0	2,202643172
1228	0	501	4	0	1,960784314
1229	0	501	6	0	0,469483568
1230	0	501	8	0	0,3003003
1231	0	501	11	0	0,468384075
1232	0	502	0	0	1,428571429
1233	0	503	0	1	1,754385965
1234	0	503	1	1	0,578034682
1235	0	504	0	0	4,69043152
1236	0	504	13	0	0,346740638
1237	0	504	15	0	0,210970464
1238	0	504	18	0	0,251572327
1239	0	505	0	0	4,444444444
1240	0	506	0	1	8,301886792
1241	0	506	2	1	19,8630137
1242	0	507	0	0	1,49750416
1243	0	507	7	0	0,363636364
1244	0	508	0	0	2,53164557
1245	0	509	0	0	2,243589744
1246	0	510	0	0	2,105263158
1247	0	510	2	0	2,538071066
1248	0	510	4	0	1,6
1249	0	510	7	0	0,660792952
1250	0	511	0	1	7,161803714
1251	0	511	1	1	10,83743842
1252	0	512	0	0	18,14516129
1253	0	512	1	0	11,00917431
1254	0	512	3	0	5,300353357
1255	0	512	5	0	2,496532594
1256	0	512	8	0	1,351351351
1257	0	512	12	0	1,321003963
1258	0	513	0	1	0,779220779
1259	0	513	1	1	3,915662651
1260	0	513	3	1	10,45454545
1261	0	514	0	1	6,341463415
1262	0	514	1	1	25,64935065
1263	0	514	3	1	7,894736842
1264	0	514	7	1	14,92957746
1265	0	514	10	1	4,748603352
1266	0	514	11	1	3,664921466
1267	0	514	14	1	4,405286344
1268	0	514	16	1	4,068522484
1269	0	515	1	0	3,90625
1270	0	515	4	0	1,225114855
1271	0	516	0	0	2,595155709
1272	0	516	1	0	6,548431105
1273	0	516	2	0	2,43902439
1274	0	516	4	0	0,895522388
1275	0	516	7	0	0,974421437
1276	0	517	0	0	4,508196721
1277	0	517	1	0	3,180212014
1278	0	517	3	0	12,04819277
1279	0	517	5	0	7,2
1280	0	517	9	0	2,671755725
1281	0	517	10	0
1282	0	518	0	1	15,72580645
1283	0	519	0	0	1,017811705
1284	0	519	4	0	0,419727177
1285	0	519	6	0	0,937866354
1286	0	519	8	0	0,868621064
1287	0	520	0	0	3,300330033
1288	0	520	3	0	2,431610942
1289	0	520	5	0	1,464435146
1290	0	520	8	0	1,237623762
1291	0	521	0	0	7,407407407
1292	0	522	0	0	0,624024961
1293	0	522	3	0	1,591511936
1294	0	523	0	0	1,445086705
1295	0	523	1	0	0,581395349
1296	0	524	0	1	12,3853211
1297	0	525	0	1	2,681388013
1298	0	525	1	1	1,650165017
1299	0	525	3	1	1,132686084
1300	0	526	0	0	3,686635945
1301	0	526	1	0	5,555555556
1302	0	527	0	0	2,950819672
1303	0	527	3	0	29,33333333
1304	0	527	4	0	26,1682243
1305	0	527	6	0	4,87804878
1306	0	527	8	0	3,157894737
1307	0	527	11	0	0,823045267
1308	0	528	0	1	4,666666667
1309	0	528	2	1	8,333333333
1310	0	529	0	0	9,701492537
1311	0	529	3	0	8,533333333
1312	0	529	6	0	1,291512915
1313	0	529	8	0	0,724637681
1314	0	529	13	0	0,572737686
1315	0	530	0	1	10,52631579
1316	0	530	2	1	11,20689655
1317	0	530	8	1	5,484247375
1318	0	531	0	0	1,222493888
1319	0	532	0	0	4,423380727
1320	0	533	0	0	3,058103976
1321	0	533	1	0	6,310679612
1322	0	533	4	0	4,600484262
1323	0	533	6	0	1,546391753
1324	0	534	0	1	0
1325	0	534	2	1	2,112676056
1326	0	534	4	1	9,489051095
1327	0	534	5	1	19,35483871
1328	0	534	7	1	10,98901099
1329	0	535	0	1	1,745200698
1330	0	536	0	0	4,27184466
1331	0	536	2	0	1,216216216
1332	0	537	0	0	2,298850575
1333	0	537	2	0	6,751054852
1334	0	537	4	0	2,249488753
1335	0	537	7	0	0,892857143
1336	0	538	0	0	1,374570447
1337	0	539	0	0	4,918032787
1338	0	539	1	0	3,619909502
1339	0	539	3	0	4,248366013
1340	0	539	5	0	5,63002681
1341	0	540	0	0	1,041666667
1342	0	540	2	0	1,582278481
1343	0	540	4	0	3,194444444
1344	0	540	5	0	2,56916996
1345	0	541	0	1	1,388888889
1346	0	541	1	1	2,312138728
1347	0	542	0	0	2,030456853
1348	0	542	4	0	3,896103896
1349	0	543	0	0	3,181818182
1350	0	544	0	0	1,597444089
1351	0	544	1	0	0,8
1352	0	544	3	0	0,923076923
1353	0	544	4	0	1,408450704
1354	0	544	6	0	3,714285714
1355	0	545	0	0	4,988662132
1356	0	545	2	0	6,513409962
1357	0	546	0	0	2,571041949
1358	0	547	0	1	9,302325581
1359	0	547	7	1	2,424942263
1360	0	547	7	1	1,19047619
1361	0	547	8	1	1,986754967
1362	0	547	9	1	0,619834711
1363	0	547	10	1	1,7727639
1364	0	547	11	1	1,223902088
1365	0	547	12	1	0,914205345
1366	0	547	13	1	1,391650099
1367	0	547	14	1	0,830367734
1368	0	547	15	1	0,439882698
1369	0	547	16	1	2,218934911
1370	0	548	0	1	1,513877208
1371	0	548	2	0	0,400641026
1372	0	549	0	0	0,526315789
1373	0	549	5	0	0,4
1374	0	549	9	0	4,119850187
1375	0	549	13	0	8,712121212
1376	0	549	15	0	16,66666667
1377	0	549	16	0	9,489051095
1378	0	549	19	0	2,372262774
1379	0	550	0	0	1,892744479
1380	0	551	0	0	6,926406926
1381	0	551	2	0
1382	0	551	6	0	1,913043478
1383	0	551	9	0	1,884570082
1384	0	552	0	0	0,973574409
1385	0	552	5	0	0
1386	0	552	7	0	0,575815739
1387	0	552	8	0	1,938610662
1388	0	553	0	0	11,76470588
1389	0	553	2	0	11,47540984
1390	0	554	0	1	8
1391	0	554	4	1	3,908045977
1392	0	554	5	1	1,632653061
1393	0	554	6	1	5,125148987
1394	0	554	7	1	9,912536443
1395	0	554	8	1	2,684563758
1396	0	554	9	1	1,833568406
1397	0	554	10	1	1,936218679
1398	0	554	11	1	2,290836653
1399	0	555	0	1	5,454545455
1400	0	555	3	1	6,638115632
1401	0	555	4	1	4,60199005
1402	0	555	5	1	3,457106274
1403	0	555	6	1	1,04
1404	0	555	7	1	2,943237561
1405	0	555	8	1	1,82748538
1406	0	555	9	1	0,952380952
1407	0	555	10	1	1,151315789
1408	0	555	11	1	0,619834711
1409	0	555	12	1	2,548903379
1410	0	556	0	1	14,7826087
1411	0	556	4	1	10,85271318
1412	0	556	5	1	12,91585127
1413	0	556	6	1	29,41176471
1414	0	556	7	1	16,23616236
1415	0	556	8	1	8,356164384
1416	0	556	9	1	1,995798319
1417	0	556	10	1	2,860169492
1418	0	556	11	1	3,453689168
1419	0	556	12	1	3,938115331
1420	0	556	13	1	4,026845638
1421	0	557	0	1	13,08411215
1422	0	557	2	1	29,16666667
1423	0	558	0	1	13,93442623
1424	0	558	0	1	19,00452489
1425	0	558	1	1	21,40921409
1426	0	558	2	1	19,58762887
1427	0	558	3	1	5,739130435
1428	0	558	4	1	6,501547988
1429	0	558	4	1	3,109452736
1430	0	558	5	1	3,604651163
1431	0	558	6	1	2,553191489
1432	0	558	7	1	2,497027348
1433	0	558	8	1
1434	0	559	0	1	7,01754386
1435	0	559	0	1	6,976744186
1436	0	559	2	1	5,027932961
1437	0	559	2	1	11,87845304
1438	0	559	3	1	15,36144578
1439	0	559	4	1	20,56892779
1440	0	559	5	1	30,76923077
1441	0	559	6	1	18,04008909
1442	0	559	7	1	14,83679525
1443	0	559	8	1	7,088607595
1444	0	559	9	1
1445	0	560	0	1	1,278409091
1446	0	560	1	1	2,644230769
1447	0	560	2	1	5,740181269
1448	0	560	3	1	7,514450867
1449	0	560	4	1	5,024311183
1450	0	560	5	1	1,572052402
1451	0	560	6	1	1,517911354
1452	0	560	7	1	1,6840417
1453	0	560	8	1	2,704733283
1454	0	560	9	1	1,44486692
1455	0	560	10	1	0,949367089
1456	0	561	0	0	14,28571429
1457	0	561	1	0	10,42780749
1458	0	561	2	0	28,61952862
1459	0	561	7	0	2,029769959
1460	0	562	0	0	0,324675325
1461	0	562	3	0	2,393617021
1462	0	563	0	0	0,91954023
1463	0	563	1	0	2,466793169
1464	0	563	2	0	2,278481013
1465	0	564	0	0	2,290076336
1466	0	564	5	0	7,236842105
1467	0	564	7	0	8,544303797
1468	0	565	0	0	12,57142857
1469	0	565	2	0	12,63157895
1470	0	565	4	0	6,26349892
1471	0	565	7	0	0,816326531
1472	0	566	0	1	13,33333333
1473	0	566	2	1	15,19607843
1474	0	566	4	1	45,71428571
1475	0	566	5	1	23,73300371
1476	0	566	5	1	13,51351351
1477	0	566	5	1	14,68189233
1478	0	566	6	1	18,56866538
1479	0	566	7	1	9,650582363
1480	0	566	10	1	18,76208897
1481	0	566	11	1	9,475806452
1482	0	567	0	1	13,66906475
1483	0	567	4	1	10,16393443
1484	0	567	5	1	6,25
1485	0	567	6	1	3,307392996
1486	0	567	7	1	4,392764858
1487	0	567	8	1	4,337349398
1488	0	567	9	1	3,198294243
1489	0	567	10	1	2,00617284
1490	0	567	11	1	2,4
1491	0	567	12	1	2,452830189
1492	0	567	13	1	1,996927803
1493	0	568	0	0
1494	0	568	1	0	16,94444444
1495	0	569	0	0	2,777777778
1496	0	569	1	0	0,777202073
1497	0	569	1	0	2,183406114
1498	0	570	0	0	1,943462898
1499	0	570	1	0	3,632887189
1500	0	570	3	0	2,447552448
1501	0	571	0	0	3,461538462
1502	0	571	1	0	8,947368421
1503	0	571	2	0	9,302325581
1504	0	571	3	0	13,58024691
1505	0	572	0	1	9,045226131
1506	0	572	1	1	18,87640449
1507	0	573	4	1	8,888888889
1508	0	574	2	0	1,183431953
1509	0	574	4	0	2,362204724
1510	0	574	6	0	12,5
1511	0	574	11	0	0
1512	0	574	13	0	8,24742268
1513	0	574	15	0	5,072463768
1514	0	574	17	0	4,186046512
1515	0	575	4	0	2,795698925
1516	0	576	13	0	0,412371134
1517	0	577	5	1	1,843971631
1518	0	577	7	1	1,714285714
1519	0	577	10	1	0,430802369
1520	0	578	4	0	5,780346821
1521	0	579	5	0	1,012145749
1522	0	579	9	0	1,546391753
1523	0	579	11	0	1,247771836
1524	0	579	13	0	4,054054054
1525	0	579	16	0	1,44092219
1526	0	580	0	1	1,651376147
1527	0	580	5	1	5,019305019
1528	0	581	2	1	0,587084149
1529	0	581	4	1	3,340757238
1530	0	581	7	1	10,14492754
1531	0	581	9	1	2,697095436
1532	0	581	11	1	1,609195402
1533	0	581	14	1	0,527240773
1534	0	582	1	1	0,668896321
1535	0	582	3	1	0,564174894
1536	0	582	4	1	1,839464883
1537	0	582	6	1	0,925925926
1538	0	582	8	1	5,572289157
1539	0	583	1	1	3,76344086
1540	0	583	2	1	21,66666667
1541	0	583	3	1	16,44736842
1542	0	583	5	1	5,555555556
1543	0	583	8	1	3,515625
1544	0	583	10	1	1,136363636
1545	0	583	10	1	1,794453507
1546	0	583	12	1	0,802568218
1547	0	583	15	1	0,470588235
1548	0	584	1	0	0,552486188
1549	0	584	6	0	2,444444444
1550	0	584	9	0	2,905569007
1551	0	584	13	0	1,333333333
1552	0	585	1	0	0,63559322
1553	0	585	3	0	5,445544554
1554	0	585	5	0	4,577464789
1555	0	586	0	0	1,063829787
1556	0	586	2	0	1,612903226
1557	0	587	0	1	1,680672269
1558	0	587	2	1	2,215189873
1559	0	587	4	1	0,573065903
1560	0	587	5	1	2,352941176
1561	0	587	7	1	0,471698113
1562	0	587	9	1	0,410677618
1563	0	587	12	1	2,816901408
1564	0	588	1	0	2,226345083
1565	0	588	3	0	1,192504259
1566	0	589	1	0	1,813471503
1567	0	589	3	0	1,652892562
1568	0	590	1	0	2,592592593
1569	0	590	2	0	0,669642857
1570	0	590	5	0	0,601805416
1571	0	590	7	0	1,864181092
1572	0	591	0	0	2,977232925
1573	0	591	1	0	1,83908046
1574	0	591	2	0	2,603036876
1575	0	591	4	0	1,265822785
1576	0	592	0	0	1,709401709
1577	0	592	5	0	1,941747573
1578	0	592	7	0	4,21686747
1579	0	592	9	0	0,763358779
1580	0	592	11	0	0,982318271
1581	0	593	0	0	0,23255814
1582	0	593	3	0	1,565217391
1583	0	594	1	1	14,34689507
1584	0	594	2	1	10,82621083
1585	0	594	5	1	19,78417266
1586	0	594	5	1	5,653710247
1587	0	594	7	1	24,10714286
1588	0	594	9	1	32,43243243
1589	0	594	12	1	26,28865979
1590	0	595	0	0	0,547445255
1591	0	595	2	0	4,11311054
1592	0	596	0	0	0,793650794
1593	0	596	8	0	0,910596026
1594	0	596	9	0	1,406799531
1595	0	597	0	1	3,579418345
1596	0	597	2	1	3,836317136
1597	0	598	0	0	0,883002208
1598	0	598	2	0	1,98019802
1599	0	599	0	0	3,017241379
1600	0	599	1	0	6,547619048
1601	0	599	2	0	6,315789474
1602	0	599	4	0	1,395348837
1603	0	599	6	0	1,346153846
1604	0	599	8	0	0,865800866
1605	0	599	9	0	1,559020045
1606	0	599	11	0	0,967117988
1607	0	600	0	0	0,73800738
1608	0	600	1	0	1,477832512
1609	0	600	3	0	1,535508637
1610	0	601	0	0	3,06122449
1611	0	601	2	0	30
1612	0	601	4	0	3,51758794
1613	0	602	1	0	3,715670436
1614	0	602	3	0	3,411131059
1615	0	602	4	0	1,134215501
1616	0	602	6	0	0,709219858
1617	0	602	8	0	1,239157373
1618	0	602	10	0	0,589622642
1619	0	603	2	1	14,28571429
1620	0	603	4	1	18,02325581
1621	0	603	6	1	14,04109589
1622	0	603	7	1	4,402515723
1623	0	603	8	1	10,16949153
1624	0	603	9	1	4,347826087
1625	0	603	10	1	1,907790143
1626	0	603	11	1	1,223776224
1627	0	604	0	1	8,333333333
1628	0	604	3	1	0,9375
1629	0	604	5	1	2,770083102
1630	0	604	7	1	0,553505535
1631	0	605	1	1
1632	0	605	4	1	2,702702703
1633	0	605	7	1	8,396946565
1634	0	605	9	1	1,351351351
1635	0	606	1	0	0,828729282
1636	0	606	2	0	0,248756219
1637	0	607	0	0	8,717948718
1638	0	607	1	0	2,298850575
1639	0	607	2	0	4,705882353
1640	0	607	4	0	0,510204082
1641	0	607	6	0	2,06185567
1642	0	607	8	0	4,62962963
1643	0	608	0	1	4,4397463
1644	0	608	2	1	5,533596838
1645	0	608	4	1	1,587301587
1646	0	609	0	1	3,652173913
1647	0	609	1	1	1,65184244
1648	0	609	3	1	3,571428571
1649	0	609	5	1	1,01010101
1650	0	609	5	1	0,610997963
1651	0	610	0	1	11,29707113
1652	0	610	2	1	11,89427313
1653	0	610	4	1	5,909090909
1654	0	610	5	1	9,259259259
1655	0	610	7	1	1,393497014
1656	0	610	10	1	2,311643836
1657	0	611	0	0	3,467153285
1658	0	611	2	0	0,409836066
1659	0	612	0	0	2,781289507
1660	0	612	2	0	0,72859745
1661	0	612	4	0	1,030927835
1662	0	613	0	1	2,888086643
1663	0	613	1	1	10,34482759
1664	0	613	6	1	16,21621622
1665	0	613	9	1	2,76816609
1666	0	614	0	0	1,559934319
1667	0	614	8	0	2,541436464
1668	0	614	10	0	2,419354839
1669	0	614	12	0	1,555555556
1670	0	614	14	0	3,481012658
1671	0	614	16	0	7,423580786
1672	0	614	18	0	3,097345133
1673	0	615	1	0	8
1674	0	615	2	0	14,45086705
1675	0	615	4	0	11,94029851
1676	0	616	1	1	9,265175719
1677	0	616	3	1	9,375
1678	0	616	4	1	6,046511628
1679	0	616	6	1	13,23529412
1680	0	617	0	1	0,710900474
1681	0	617	1	1	0,875656743
1682	0	617	3	1	0,557103064
1683	0	617	5	1	1,525658807
1684	0	618	2	0	3,939393939
1685	0	618	4	0	2,731092437
1686	0	618	6	0	0,561797753
1687	0	618	8	0	0,553505535
1688	0	619	2	0	6,25
1689	0	619	4	0	0,643086817
1690	0	620	3	1	0,536193029
1691	0	620	3	1	0,110375276
1692	0	620	5	1	1,689708141
1693	0	620	8	1	1,492537313
1694	0	621	2	1	5,905511811
1695	0	622	0	0	6,307977737
1696	0	622	5	0	0,272479564
1697	0	623	0	0	1,520912548
1698	0	623	2	0	3,409090909
1699	0	623	4	0	8,843537415
1700	0	623	6	0	11,33333333
1701	0	624	0	1	0,425531915
1702	0	624	1	1	0
1703	0	624	3	1	0,483091787
1704	0	625	0	1	74,78991597
1705	0	625	2	1	29,00232019
1706	0	625	3	1	10,23765996
1707	0	625	4	1	3,298611111
1708	0	625	7	1	10,45081967
1710	0	627	0	0	15,78947368
1711	0	627	1	0
1712	0	627	3	0	2,02020202
1713	0	627	5	0	1,834862385
1714	0	628	0	0	2,280130293
1715	0	628	1	0	2,739726027
1716	0	628	3	0	5,705705706
1717	0	629	0	0	8,080808081
1718	0	629	1	0	13,21585903
1719	0	629	5	0	2,831858407
1720	0	630	0	0	2,51572327
1721	0	630	1	0	1,838755304
1722	0	630	3	0	1,509433962
1723	0	631	0	0	3,734439834
1724	0	631	2	0	6,572769953
1725	0	631	4	0	4,385964912
1726	0	631	6	0	1,688555347
1727	0	632	0	0	2,777777778
1728	0	632	2	0	0,433839479
1729	0	632	4	0	1,813110181
1730	0	632	6	0	0,520291363
1731	0	633	0	0	0,623700624
1732	0	633	3	0	0,770218228
1733	0	633	5	0	0,576701269
1734	0	633	7	0	0,257400257
1735	0	634	0	1	8,516483516
1736	0	634	2	1	4,761904762
1737	0	634	5	1	6,345177665
1738	0	634	8	1	1,769911504
1739	0	635	0	0	0,673854447
1740	0	635	5	0	2,752293578
1741	0	635	6	0	2,574257426
1742	0	636	0	0	9,615384615
1743	0	636	1	0	5,97826087
1744	0	636	3	0	1,657458564
1745	0	636	5	0	2,8125
1746	0	637	0	0	2,255639098
1747	0	637	2	0	1,55210643
1748	0	637	4	0	4,606060606
1749	0	638	0	0	2,147239264
1750	0	638	2	0	0,54446461
1751	0	639	0	0	3,045685279
1752	0	639	1	0	2,602230483
1753	0	639	3	0	4,175824176
1754	0	640	0	1	0
1755	0	640	2	1	4,347826087
1756	0	640	6	1	4,469273743
1757	0	640	8	1	1,565074135
1758	0	641	0	1	3,958333333
1759	0	641	1	1	2,362204724
1760	0	642	0	0	1,048951049
1761	0	642	5	0	4,964539007
1762	0	642	7	0	2,135231317
1763	0	643	0	0	2,272727273
1764	0	643	1	0	3,236245955
1765	0	643	3	0	1,991150442
1766	0	643	5	0	1,892744479
1767	0	643	7	0	1,355932203
1768	0	644	0	0	0,720906282
1769	0	644	1	0	0,148920328
1770	0	645	0	0	1,081081081
1771	0	645	9	0	12
1772	0	645	13	0	6,299212598
1773	0	646	0	1	0,821167883
1774	0	646	2	1	0,604229607
1775	0	646	6	1	1,685393258
1776	0	647	0	1	1,485148515
1777	0	647	2	1	7,012195122
1778	0	648	0	0	0,729927007
1779	0	649	0	0	1,797385621
1780	0	649	1	0	1,912568306
1781	0	649	3	0	1,803278689
1782	0	649	6	0	0,520156047
1783	0	650	2	1	11,81102362
1784	0	651	10	0	1,57480315
1785	0	651	13	0	1,363636364
1786	0	651	16	0	6,727828746
1787	0	652	0	0	9,154929577
1788	0	652	2	0	1,005025126
1789	0	652	3	0	10,03236246
1790	0	652	5	0	11,38790036
1791	0	653	0	1	1,93236715
1792	0	653	2	1	2,98013245
1793	0	653	5	1	3,035413153
1794	0	654	0	0	1,140684411
1795	0	654	2	0	1,428571429
1796	0	655	0	0	0,305810398
1797	0	655	2	0	0,848896435
1798	0	656	0	0	2
1799	0	656	2	0	6,268656716
1800	0	656	3	0	3,614457831
1801	0	657	0	0	3,03030303
1802	0	657	2	0	1,408450704
1803	0	658	0	0	1,988636364
1804	0	658	1	0	2,136752137
1805	0	658	3	0	2,028397566
1806	0	658	5	0	3,529411765
1807	0	659	0	1	1,170960187
1808	0	659	4	1	4,587155963
1809	0	660	0	0	1,03626943
1810	0	660	2	0	0,964187328
1811	0	661	0	0	2,416918429
1812	0	661	2	0	3,703703704
1813	0	662	0	0	9,230769231
1814	0	662	1	0	16,27906977
1815	0	662	3	0	1,449275362
1816	0	663	0	1	2,040816327
1817	0	663	2	1	3,924914676
1818	0	663	4	1	2,713178295
1819	0	664	0	0	0,955414013
1820	0	664	2	0	2,489626556
1821	0	665	0	0	0
1822	0	665	1	0	17,76315789
1823	0	665	2	0	1,10619469
1824	0	665	4	0	1,247401247
1825	0	665	5	0	0,717703349
1826	0	666	0	1	0
1827	0	666	2	1	6,557377049
1828	0	666	4	1
1829	0	666	6	1	3,55987055
1830	0	667	0	0	3,002309469
1831	0	668	5	1	2,096436059
1832	0	669	4	0	3,096539162
1833	0	670	0	0	3,151862464
1834	0	670	3	0	5
1835	0	671	0	0	5,445544554
1836	0	672	0	1	5,769230769
1837	0	672	1	1	10,18867925
1838	0	672	3	1	1,418439716
1839	0	673	0	0	1,005025126
1840	0	673	3	0	2,05338809
1841	0	674	0	1	3,31010453
1842	0	674	3	1	5,128205128
1843	0	675	0	0	1,707317073
1844	0	676	0	1	6,007393715
1845	0	676	1	1	14,95652174
1846	0	676	3	1	22,67404034
1847	0	677	0	1	1,481481481
1848	0	677	2	1	3,274559194
1849	0	677	4	1	1,423487544
1850	0	678	0	1	9,594095941
1851	0	678	1	1	10
1852	0	678	3	1	7,110438729
1853	0	679	0	0	11,79039301
1854	0	679	2	0	9,865470852
1855	0	680	0	0	8,992805755
1856	0	680	2	0	3,311258278
1857	0	681	0	0	5,647058824
1858	0	681	2	0	3,317535545
1859	0	682	0	0	2,306079665
1860	0	682	1	0	1,773049645
1861	0	682	3	0	0,423131171
1862	0	683	0	0	0,64516129
1863	0	683	5	0	1,822323462
1864	0	683	6	0	2,976190476
1865	0	683	7	0	2,624671916
1866	0	684	0	0	4,230769231
1867	0	684	3	0	4,347826087
1868	0	685	0	1	0,756143667
1869	0	685	1	1	2,090592334
1870	0	685	3	1	1,113861386
1871	0	686	0	1	1,545253863
1872	0	686	1	1	1,457399103
1873	0	686	2	1	1,314060447
1874	0	686	4	1	1,228501229
1875	0	687	0	1	1,203007519
1876	0	687	3	1	2,618453865
1877	0	688	0	0	2,43902439
1878	0	688	1	0	4,95049505
1879	0	689	1	0	5,365853659
1880	0	689	3	0	21,21212121
1881	0	690	0	1	3,870967742
1882	0	690	2	1	10,07751938
1883	0	691	1	0	3,736920777
1884	0	691	2	0	3,600654664
1885	0	692	0	0	1,457725948
1886	0	692	2	0	2,173913043
1887	0	693	0	1	3,515625
1888	0	693	3	1	10,13986014
1889	0	694	0	0	1,811594203
1890	0	694	1	0	6,392694064
1891	0	694	3	0	2,572347267
1892	0	695	3	1	11,25
1893	0	695	4	1	24,39862543
1894	0	695	5	1	26,13390929
1895	0	695	6	1	27,6371308
1896	0	695	7	1	16,70644391
1897	0	696	3	1	3,763789747
1898	0	696	3	1	0,702576112
1899	0	696	3	1	0,293542074
1900	0	696	3	1	0,480769231
1901	0	696	20	1	0,104712042
1902	0	696	21	1	0,620475698
1903	0	696	22	1	0,811030008
1904	0	696	23	1	1,029866117
1905	0	696	24	1	0,308959835
1906	0	697	2	0
1907	0	697	3	0
1908	0	698	20	1	0
1909	0	698	21	1	0,192678227
1910	0	698	22	1	0,575373993
1911	0	698	23	1	0,899280576
1912	0	698	24	1	0,197628458
1913	0	698	25	1	0,836820084
1914	0	698	26	1	0,694444444
1916	0	700	0	0	0
1928	0	703	2	1	1,388888889
1929	0	703	3	1	4,441624365
1930	0	703	4	1	4,644808743
1931	0	703	5	1	2,306425041
1932	0	703	6	1	3,281519862
1933	0	703	7	1	2,04359673
1934	0	703	8	1	1,754385965
1935	0	704	2	1	8,454810496
1936	0	704	3	1	7,721280603
1937	0	704	4	1	20,52980132
1938	0	704	5	1	22,04610951
1939	0	704	6	1	15,78947368
1940	0	704	7	1	9,730848861
1941	0	704	8	1	3,100775194
1942	0	705	1	1	2,725366876
1943	0	705	3	1	1,877934272
1944	0	705	4	1	1,754385965
1945	0	705	5	1	1,644736842
1946	0	705	6	1	0,625651721
1947	0	706	5	0
1948	0	707	3	0	1,834862385
1949	0	707	5	0
1950	0	708	0	0	0,492610837
1951	0	709	0	1	1,559020045
1952	0	709	1	1	2,07852194
1953	0	709	2	1	1,682692308
1954	0	709	3	1	1,392111369
1955	0	709	4	1	0,984251969
1956	0	710	1	1	2,507836991
1957	0	710	1	1	10,71428571
1958	0	710	2	1	16,01830664
1959	0	710	4	1	10,50228311
1960	0	711	3	1	13,07692308
1961	0	711	3	1	22,88135593
1962	0	711	4	1	10,66666667
1963	0	712	0	1	2,127659574
1964	0	712	1	1	3,8585209
1965	0	712	2	1	13,49206349
1966	0	712	3	1	22,34636872
1967	0	712	4	1	14,07942238
1968	0	713	0	0	1,00931677
1969	0	714	3	0	0,131752306
1970	0	715	1	0	0,600150038
1971	0	716	3	0	1,19047619
1972	0	717	0	1	0,70754717
1973	0	717	0	1	2,53164557
1974	0	717	1	1	4,414587332
1975	0	717	2	1	10,82352941
1976	0	718	0	1	8,355091384
1977	0	718	1	1	6,993006993
1978	0	718	2	1	4,448742747
1979	0	719	0	0	2,135231317
1980	0	720	0	0	1,346801347
1981	0	721	0	1	1,560283688
1982	0	721	1	1	1,854140915
1983	0	722	0	0	3,291139241
1984	0	723	0	1	14,35185185
1985	0	723	1	1	12,64367816
1986	0	724	1	1	5,263157895
1987	0	724	1	1	3,738317757
1988	0	725	0	1	0,847457627
1989	0	726	0	1	6,986899563
1991	0	728	0	0	0,388349515
1992	0	729	0	1	2,668360864
1993	0	729	0	1	3,562005277
1994	0	730	0	1	4,666666667
1995	0	730	1	1	8,846153846
1996	0	730	2	1	8,794788274
1997	0	730	3	1	11,46496815
1998	0	730	4	1	7,063197026
1999	0	731	1	0	0,149031297
2000	0	732	0	0	0,675675676
2001	0	733	0	1	2,4
2002	0	734	0	0	0,909090909
2003	0	735	4	1	0,963081862
2004	0	735	4	1	1,167883212
2005	0	735	5	1	1,390268123
2006	0	735	6	1	2,022058824
2007	0	735	7	1	1,926782274
2008	0	735	8	1	3,253796095
2009	0	735	9	1	2,257636122
2010	0	736	0	0	0,625
2011	0	737	0	1	1,188455008
2012	0	737	1	1	2,162162162
2013	0	737	2	1	2,202643172
2014	0	738	0	0	1,538461538
2015	0	739	2	1
2016	0	739	4	1
2017	0	740	1	0	1,328903654
2018	0	740	2	0	0,592592593
[truncated: 589 more rows]
