# Supplementary material for: A novel haemocytometric COVID-19 prognostic score developed and validated in an observational multicentre European hospital-based study
Source: eLife journal article supplement (doi:10.7554/elife.63195), 2020-11-26
Supplement: supp [file elife-63195-supp-v1.zip › elife_poa_e63195_Figure_6_source_data_1.csv]

Figure 6 – source data file 1. Source data for trends of corrected haemoglobin values over 14 days of hospitalisation in critical/fatal (CF) and non-critical (NC) patients
Filename	exclusion	Pat_ID	length_of_hospitalisation	Critical_or_Fatal	HGB_age_corrected
1	0	1	0	1	17,2
2	0	1	2	1	15,6
3	0	1	2	1	14,9
4	0	1	3	1	14,8
5	0	1	4	1	14,4
6	0	1	15	1	12,8
7	0	2	0	0	16,5
8	0	2	1	0	15,1
9	0	2	2	0	15
10	0	2	3	0	14,3
11	0	2	4	0	14,8
12	0	2	6	0	14,9
13	0	3	0	1	12,4
14	0	3	1	1	11,5
15	0	3	1	1	10,8
16	0	3	2	1	11,8
17	0	3	3	1	12,9
18	0	3	4	1	12,4
19	0	3	4	1	11,6
20	0	3	5	1	11,8
21	0	3	6	1	11,7
22	0	3	7	1	10,2
23	0	3	8	1	9,9
24	0	3	9	1	10,5
25	0	3	10	1	10,7
26	0	3	11	1	9,9
27	0	3	12	1	9,5
28	0	3	13	1	9,3
29	0	4	0	1	10,45
30	0	4	1	1	10,78
31	0	4	1	1	9,79
32	0	4	2	1	8,69
33	0	4	3	1	8,69
34	0	4	4	1	9,02
35	0	4	5	1	8,91
36	0	4	6	1	7,15
37	0	4	7	1	10,23
38	0	4	8	1	8,25
39	0	4	9	1	8,8
40	0	4	10	1	7,7
41	0	4	10	1	7,37
42	0	4	11	1	10,01
43	0	4	12	1	8,91
44	0	4	13	1	9,68
45	0	4	14	1	10,34
46	0	5	0	0	15,07
47	0	5	1	0	14,3
48	0	6	0	0	15,07
49	0	6	2	0	14,85
50	0	6	3	0	13,42
51	0	6	5	0	12,87
52	0	7	0	0	13,97
53	0	7	2	0	12,76
54	0	7	3	0	12,65
55	0	7	4	0	11,99
56	0	7	5	0	11,99
57	0	7	6	0	11,55
58	0	8	1	0	16,06
59	0	9	0	0	13,7
60	0	9	2	0	11,9
61	0	9	3	0	11,9
62	0	9	4	0	12,2
63	0	9	5	0	12,1
64	0	9	7	0	12,5
65	0	10	0	1	14
66	0	10	1	1	12,8
67	0	10	3	1	12,8
68	0	10	4	1	12,1
69	0	11	0	0	17,71
70	0	11	1	0	14,52
71	0	11	3	0	14,19
72	0	12	0	1	12,7
73	0	12	2	1	11,5
74	0	13	5	1	8,7
75	0	13	6	1	9,5
76	0	13	7	1	9,5
77	0	13	8	1	9
78	0	13	9	1	8,7
79	0	13	9	1	8,5
80	0	13	10	1	8,4
81	0	13	11	1	8,3
82	0	13	12	1	8,4
83	0	13	13	1	8
84	0	14	1	0	16
85	0	15	13	1	11,4
86	0	15	14	1	11,3
87	0	15	15	1	11,1
88	0	15	16	1	11,8
89	0	15	17	1	11,5
90	0	15	18	1	11,8
91	0	15	19	1	12,2
92	0	15	20	1	13,1
93	0	16	11	1	9,2
94	0	16	12	1	8,9
95	0	16	13	1	8,9
96	0	16	14	1	8,7
97	0	16	15	1	9,1
98	0	16	16	1	9
99	0	16	17	1	9,5
100	0	16	18	1	9,1
101	0	16	19	1	8,7
102	0	17	1	0	15,18
103	0	17	2	0	14,3
104	0	17	4	0	14,41
105	0	18	0	1	14,2
106	0	18	2	1	14
107	0	18	2	1	13
108	0	18	3	1	13,4
109	0	18	4	1	12,6
110	0	19	0	1	12,5
111	0	19	1	1	13,1
112	0	19	3	1	11,1
113	0	20	0	0	14,1
114	0	20	1	0	13,5
115	0	20	3	0	12,5
116	0	21	0	1	14,2
117	0	22	0	0	14,85
118	0	23	0	0	13,6
119	0	24	0	0	14,52
120	0	25	0	1	12,3
121	0	26	0	0	15
122	0	27	0	0	15,84
123	0	28	0	0	13,8
124	0	29	0	0	14,96
125	0	30	0	1	16
126	0	30	4	1	13,9
127	0	31	0	0	15
128	0	32	0	1	14
129	0	33	0	1	11,6
130	0	34	0	1	13,3
131	0	35	0	0	15,73
132	0	36	0	1	12,1
133	0	37	0	0	15,6
134	0	38	0	1	14,85
135	0	39	0	0	15,5
136	0	40	0	0	17,7
137	0	41	0	0	11,9
138	0	42	0	0	14,8
139	0	43	0	0	13,7
140	0	44	0	0	11,6
141	0	45	0	1	12,7
142	0	45	1	1	13
143	0	45	1	1	12,6
144	0	45	2	1	11,4
145	0	45	3	1	11,3
146	0	45	4	1	11,2
147	0	45	5	1	8
148	0	45	5	1	7,7
149	0	45	6	1	8,1
150	0	45	6	1	8,6
151	0	45	7	1	8,7
152	0	45	7	1	9,1
153	0	45	8	1	9
154	0	45	9	1	9,8
155	0	45	10	1	9,5
156	0	45	11	1	9,1
157	0	45	12	1	8,4
158	0	45	13	1	9,3
159	0	45	14	1	9,8
160	0	45	15	1	9,1
161	0	45	16	1	9,2
162	0	45	17	1	9
163	0	45	18	1	8,5
164	0	45	19	1	8,7
165	0	45	20	1	9,3
166	0	45	21	1	9,1
167	0	45	22	1	9,8
168	0	46	0	0	12,98
169	0	47	0	0	12,7
170	0	48	0	1	13,42
171	0	49	0	1	13,1
172	0	50	0	0	14
173	0	51	0	0	14,8
174	0	52	0	1	11,99
175	0	53	0	1	16
176	0	54	0	1	16,72
177	0	54	4	1	15,62
178	0	54	10	1	12,76
179	0	54	11	1	14,63
180	0	55	0	0	17,9
181	0	56	0	1	16,1
182	0	57	0	0	14,96
183	0	58	0	0	13,1
184	0	59	0	0	14,3
185	0	60	0	0	14,85
186	0	61	0	0	13,9
187	0	62	0	1	16,5
188	0	63	0	0	11,6
189	0	64	0	0	14,41
190	0	65	0	0	14,3
191	0	66	0	1	13,9
192	0	67	0	0	13,6
193	0	68	0	0	9,7
194	0	69	0	0	13,31
195	0	70	0	0	12,2
196	0	71	0	0	15,3
197	0	72	0	0	15,6
198	0	73	0	0	14,9
199	0	74	0	0	14,41
200	0	75	0	0	14,1
201	0	76	0	0	14,7
202	0	77	0	0	14,74
203	0	78	0	1	15,62
204	0	79	0	0	12,1
205	0	79	0	0	11,2
206	0	79	1	0	12,2
207	0	79	2	0	11,6
208	0	79	3	0	11,9
209	0	79	5	0	11,3
210	0	79	7	0	9,7
211	0	79	8	0	10,8
212	0	79	9	0	11,8
213	0	79	10	0	11,6
214	0	79	12	0	12,9
215	0	80	0	0	15,3
216	0	81	0	1	15,4
217	0	82	0	0	15,5
218	0	83	0	0	14,6
220	0	85	0	1	12,8
221	0	86	0	1	14,3
222	0	87	0	0	14,4
223	0	88	0	0	13,8
225	0	90	0	0	17,93
226	0	91	0	0	17,27
227	0	92	0	0	15,3
228	0	93	0	1	13,4
229	0	93	1	1	11,7
230	0	93	2	1	13,6
231	0	94	0	0	13,86
232	0	95	0	0	17,4
233	0	96	0	1	9,7
234	0	97	0	0	12,6
235	0	98	0	0	14,3
236	0	98	2	0	15,18
237	0	98	4	0	13,86
238	0	98	5	0	13,42
239	0	98	13	0	14,52
240	0	99	0	1	15,3
241	0	99	1	1	14
242	0	99	2	1	12,8
243	0	99	3	1	12,9
244	0	99	4	1	12,5
245	0	99	5	1	12,6
246	0	100	0	1	11,9
247	0	101	0	1	13,4
248	0	102	0	0	15,4
249	0	103	0	1	15
250	0	103	1	1	14,6
251	0	104	0	1	19,2
252	0	105	0	0	14,3
253	0	106	0	1	14,1
254	0	107	0	0	14,52
255	0	108	0	0	15,1
256	0	109	0	1	17,3
257	0	110	0	0	14,7
258	0	110	1	0	13,8
259	0	110	2	0	12,8
260	0	110	3	0	12,5
261	0	110	4	0	12,6
262	0	110	5	0	12,3
263	0	110	6	0	12,1
264	0	110	7	0	11,7
265	0	110	7	0	11,2
266	0	110	8	0	11,3
267	0	110	9	0	10,9
268	0	110	10	0	9,5
269	0	110	11	0	10,4
270	0	110	12	0	11
271	0	110	13	0	11,3
272	0	110	16	0	11
273	0	110	17	0	11,2
274	0	110	20	0	12,3
275	0	111	0	0	16,06
276	0	112	0	0	15,1
277	0	113	0	0	13,9
278	0	114	0	1	12,5
279	0	115	0	1	16,4
280	0	116	0	1	14,7
281	0	117	0	0	16,3
282	0	118	0	1	14,7
283	0	119	0	1	16
284	0	120	0	1	15,07
285	0	121	0	1	14,8
286	0	122	0	0	14,2
287	0	122	4	0	14,1
288	0	122	7	0	14,8
289	0	122	9	0	14,5
290	0	123	0	1	16,4
291	0	124	0	0	15,5
292	0	125	0	0	14,3
293	0	126	0	1	13,5
294	0	126	2	1	13,3
295	0	127	0	0	15,8
296	0	127	4	0	13,6
297	0	128	0	1	15,9
298	0	129	0	0	12,8
299	0	130	0	1	14,3
300	0	131	0	1	7,3
301	0	132	0	1	20,2
302	0	133	0	1	11,7
303	0	134	0	1	12,8
304	0	134	2	1	10,9
305	0	134	3	1	13,3
306	0	135	0	0	13,9
307	0	136	0	0	15,3
308	0	136	5	0	13,8
309	0	136	7	0	14,1
310	0	136	8	0	13,6
311	0	136	9	0	14,1
312	0	136	10	0	14,2
313	0	136	11	0	14,2
314	0	136	12	0	14,8
315	0	136	13	0	13,6
316	0	136	14	0	13,8
317	0	137	0	1	14,6
318	0	137	1	1	14,2
319	0	137	2	1	12,9
320	0	137	4	1	13,2
321	0	138	0	0	15,2
322	0	139	0	0	13,86
323	0	140	0	0	14,4
324	0	140	2	0	13,2
325	0	140	6	0	13,4
326	0	141	0	0	14,96
327	0	142	0	1	12,5
328	0	143	0	1	13
329	0	144	0	0	14,1
330	0	145	0	0	13,8
331	0	146	0	0	12,6
332	0	147	0	1	9,79
333	0	148	0	1	9,7
334	0	149	0	0	13,4
335	0	150	0	1	16,7
336	0	151	0	1	12,4
337	0	152	0	0	14,7
338	0	153	0	0	15,2
339	0	154	0	0	13,8
340	0	155	0	0	16,28
341	0	156	0	0	14,41
342	0	157	0	1	11,6
343	0	158	0	0	15,3
344	0	159	0	0	10,8
345	0	160	0	0	15,3
346	0	161	0	1	11,33
347	0	162	0	1	13,42
348	0	163	0	0	13,53
349	0	164	0	1	13,4
350	0	165	0	1	9,24
351	0	166	0	1	14,6
352	0	167	0	0	12,5
353	0	168	0	0	14
355	0	170	0	0	11,3
356	0	171	0	0	10,5
357	0	172	0	0	12,8
358	0	173	0	1	12,8
359	0	174	0	0	14,8
360	0	175	0	1	14,08
361	0	176	0	0	17,16
362	0	177	0	0	9,02
363	0	178	0	1	11,5
364	0	179	0	0	14,9
365	0	179	2	0	13,7
366	0	179	3	0	14,1
367	0	179	5	0	13,6
368	0	179	6	0	13,7
369	0	179	6	0	12,7
370	0	179	7	0	12,3
371	0	179	8	0	12,7
372	0	179	9	0	12,5
373	0	179	10	0	13,7
374	0	179	11	0	13,8
375	0	179	12	0	14,3
376	0	179	13	0	13,7
377	0	179	14	0	13,5
378	0	179	15	0	14,3
379	0	179	16	0	14,3
380	0	180	0	1	13,6
381	0	181	0	0	15,8
382	0	182	0	0	12,9
383	0	183	0	0	15,6
384	0	184	0	0	15,29
385	0	185	0	0	13,3
386	0	186	0	1	11,44
387	0	187	0	0	14,4
388	0	188	0	1	13,8
389	0	189	0	1	11,2
390	0	189	2	1	13,3
391	0	189	4	1	12,9
392	0	190	0	0	16,06
393	0	191	0	0	16,5
394	0	192	0	0	14,63
395	0	193	0	0	15
396	0	194	0	1	13,9
397	0	195	0	0	17,5
398	0	196	0	1	11,5
399	0	197	0	0	14,6
400	0	198	0	0	16,4
401	0	199	0	1	13,3
402	0	200	0	1	13
403	0	201	0	1	14,4
404	0	202	0	1	9,1
405	0	203	0	1	16
406	0	204	0	0	14,08
407	0	205	0	0	12,1
408	0	206	0	0	13,6
409	0	207	0	0	11,9
410	0	208	0	1	10,56
411	0	209	0	0	14,9
412	0	210	0	1	9,7
413	0	211	0	0	13,3
414	0	212	0	1	15,5
415	0	213	0	1	16,7
416	0	214	0	1	14,6
417	0	215	0	1	14,2
418	0	216	0	0	15,29
419	0	216	2	0	14,41
420	0	216	3	0	14,85
421	0	216	4	0	14,08
422	0	216	6	0	15,07
423	0	216	7	0	12,98
424	0	216	9	0	13,09
425	0	217	0	1	10,8
426	0	217	3	1	11,3
427	0	217	5	1	10,4
428	0	217	7	1	9,5
429	0	218	0	0	14,2
430	0	219	0	0	15
431	0	220	0	1	12,6
432	0	221	0	0	14,4
433	0	222	0	0	10,1
434	0	223	0	1	13,1
435	0	224	0	1	13,6
436	0	225	0	1	14,6
437	0	226	0	0	15,95
438	0	227	0	0	13,97
439	0	228	0	0	12,76
440	0	229	0	0	16,8
441	0	230	0	0	16,7
442	0	231	0	1	13,5
443	0	232	0	0	12,6
444	0	233	0	0	16,1
445	0	234	0	0	11,4
446	0	235	0	0	11,77
447	0	236	0	0	13,3
448	0	237	1	1	9,02
449	0	237	1	1	9,24
450	0	237	1	1	9,35
451	0	237	2	1	9,9
452	0	237	3	1	9,35
453	0	237	4	1	11,88
454	0	237	5	1	10,12
455	0	238	11	1	11,6
456	0	238	12	1	10
457	0	238	13	1	10,2
458	0	238	14	1	9,8
459	0	238	15	1	9,5
460	0	238	16	1	10,1
461	0	239	0	0	14,85
462	0	240	1	0	13
463	0	240	3	0	12,3
464	0	240	4	0	12,2
465	0	241	0	1	12,87
466	0	241	0	1	11,33
467	0	241	1	1	11
468	0	241	2	1	9,9
469	0	241	2	1	10,23
470	0	241	3	1	9,79
471	0	241	4	1	9,9
472	0	241	5	1	9,9
473	0	241	5	1	13,64
474	0	241	6	1	9,79
475	0	242	0	1	12,2
476	0	242	1	1	10,9
477	0	242	1	1	10,5
478	0	242	1	1	10,1
479	0	242	2	1	8,6
480	0	242	2	1	8,7
481	0	243	8	1	13
482	0	243	9	1	11,6
483	0	243	9	1	11,7
484	0	243	10	1	11,3
485	0	243	11	1	11,5
486	0	244	2	0	15,4
487	0	244	6	0	15,2
488	0	245	2	1	12,7
489	0	246	0	0	13,7
490	0	246	2	0	12,1
491	0	247	2	0	11
492	0	247	4	0	10,5
493	0	247	5	0	9,9
494	0	247	6	0	9,9
495	0	248	1	0	13,7
496	0	248	2	0	13,8
497	0	248	3	0	12,8
498	0	248	4	0	12,5
499	0	249	2	1	13,7
500	0	249	3	1	12
501	0	249	3	1	11,6
502	0	249	4	1	8,8
503	0	249	4	1	10,4
504	0	249	4	1	11,7
505	0	249	5	1	11,7
506	0	249	6	1	10,7
507	0	249	7	1	9,8
508	0	250	2	0	15,51
509	0	250	5	0	15,62
510	0	250	6	0	14,52
511	0	251	2	0	13,2
512	0	251	3	0	13,6
513	0	251	5	0	14
514	0	252	7	1	12,9
515	0	252	8	1	13
516	0	252	9	1	12,5
517	0	252	10	1	12,1
518	0	252	11	1	13
519	0	252	12	1	13,2
520	0	253	6	1	9,3
521	0	253	7	1	9
522	0	253	7	1	9
523	0	253	7	1	4,1
524	0	253	7	1	8,9
525	0	253	8	1	8,3
526	0	253	9	1	8,7
527	0	254	6	1	10,01
528	0	255	6	0	10,56
529	0	255	7	0	10,45
530	0	255	8	0	10,34
531	0	255	9	0	9,9
532	0	255	10	0	10,56
533	0	256	1	0	12
534	0	256	2	0	12,1
535	0	257	1	1	14,19
536	0	257	3	1	14,52
537	0	257	4	1	14,74
538	0	257	5	1	15,07
539	0	258	2	0	12,8
540	0	258	3	0	13,4
541	0	259	7	0	10,9
542	0	259	8	0	10,8
543	0	260	0	1	13,31
544	0	260	2	1	12,98
545	0	260	4	1	12,98
546	0	260	5	1	12,54
547	0	260	6	1	12,76
548	0	261	6	1	10,4
549	0	261	7	1	9,8
550	0	261	8	1	9,7
551	0	261	9	1	8,7
552	0	261	11	1	8,7
553	0	261	12	1	7,8
554	0	261	12	1	7,6
555	0	262	2	0	12,3
556	0	262	4	0	12,5
557	0	262	5	0	12,1
558	0	262	6	0	12,3
559	0	262	7	0	12,9
560	0	263	7	0	11,77
561	0	263	11	0	11,44
562	0	263	12	0	11,44
563	0	264	3	0	14,19
564	0	264	4	0	15,07
565	0	264	5	0	14,96
566	0	264	7	0	14,63
567	0	265	0	1	15,8
568	0	265	1	1	14,1
569	0	265	2	1	14,9
570	0	266	0	1	11,7
571	0	266	4	1	9,3
572	0	266	5	1	9,4
573	0	266	6	1	8,5
574	0	266	7	1	8,9
575	0	267	0	0	14,4
576	0	267	2	0	14,8
577	0	268	2	1	13,31
578	0	268	2	1	10,89
579	0	268	3	1	10,67
580	0	268	3	1	10,56
581	0	269	4	0	14,4
582	0	270	3	1	11,8
583	0	270	4	1	11,3
584	0	270	5	1	10,8
585	0	271	7	1	11,4
586	0	271	8	1	10,7
587	0	271	9	1	9,8
588	0	271	9	1	9,9
589	0	272	0	0	11,7
590	0	272	2	0	10,8
591	0	272	5	0	10,3
592	0	273	0	0	15,8
593	0	274	1	0	13,7
594	0	274	3	0	13,3
595	0	274	4	0	12,1
596	0	275	2	1	12,4
597	0	275	3	1	12,9
598	0	275	4	1	12
599	0	275	5	1	11,8
600	0	275	6	1	11,8
601	0	275	7	1	12,3
602	0	276	6	0	15,18
603	0	276	8	0	10,89
604	0	276	9	0	12,54
605	0	277	2	0	11,11
606	0	277	4	0	11,66
607	0	277	6	0	11,44
608	0	277	7	0	11,44
609	0	278	2	0	11
610	0	278	3	0	12,54
611	0	278	4	0	12,76
612	0	279	0	0	11,9
613	0	279	2	0	10,6
614	0	279	6	0	11,3
615	0	279	9	0	10,1
616	0	280	0	0	14,8
617	0	281	16	1	9,9
618	0	282	5	0	10,9
619	0	283	1	1	11,8
620	0	284	4	0	13,97
621	0	284	5	0	13,86
622	0	284	6	0	13,75
623	0	284	7	0	14,19
624	0	285	1	0	11,6
625	0	285	3	0	11,1
626	0	285	4	0	11,3
627	0	286	0	0	15,4
628	0	286	2	0	13,2
629	0	286	3	0	12,87
630	0	286	5	0	12,98
631	0	287	4	0	15,3
632	0	287	6	0	15,3
633	0	288	7	1	8,2
634	0	288	8	1	7,9
635	0	288	8	1	7,9
636	0	288	9	1	8,8
637	0	288	9	1	8,7
638	0	288	9	1	8,8
639	0	288	9	1	8,9
640	0	288	10	1	8,8
641	0	288	11	1	8,4
642	0	288	11	1	7,8
643	0	288	11	1	8,2
644	0	289	2	0	8,7
645	0	290	2	0	10,34
646	0	290	4	0	9,46
647	0	290	6	0	10,56
648	0	291	2	0	12,5
649	0	291	4	0	12,1
650	0	291	6	0	12,2
651	0	292	3	1	13,7
652	0	292	4	1	13,7
653	0	292	5	1	12,9
654	0	293	15	0	8,4
655	0	293	17	0	9,2
656	0	294	4	0	11,33
657	0	294	6	0	11
658	0	294	7	0	10,67
659	0	295	25	1	12,54
660	0	296	3	0	11,4
661	0	296	4	0	11,1
662	0	297	2	0	15,29
663	0	297	4	0	15,29
664	0	298	0	0	15,9
665	0	298	2	0	14,6
666	0	298	3	0	14
667	0	298	4	0	13,4
668	0	298	5	0	13,3
669	0	299	3	0	11
670	0	299	5	0	10,3
671	0	299	7	0	9,6
672	0	300	2	0	13,8
673	0	300	3	0	12,9
674	0	300	4	0	12,8
675	0	300	6	0	13,5
676	0	301	0	0	14,9
677	0	301	9	0	14,9
678	0	301	12	0	14
679	0	302	2	0	16,94
680	0	302	3	0	17,6
681	0	302	4	0	18,7
682	0	303	2	0	12,76
683	0	304	2	0	12,87
684	0	305	3	0	10,3
685	0	305	4	0	10,1
686	0	306	1	0	13,3
687	0	307	1	1	15,1
688	0	307	3	1	13,7
689	0	307	4	1	14,1
690	0	308	1	1	14,1
691	0	308	2	1	13,3
692	0	309	1	1	13,7
693	0	309	2	1	13
694	0	309	3	1	13
695	0	309	3	1	13
696	0	309	4	1	12,8
697	0	310	1	0	15,2
698	0	310	3	0	15,1
699	0	310	4	0	14,5
700	0	311	2	0	14,19
701	0	311	3	0	13,53
702	0	311	4	0	13,53
703	0	312	2	0	10,67
704	0	312	3	0	10,78
705	0	313	2	0	14,08
706	0	313	3	0	14,41
707	0	313	4	0	14,74
708	0	314	2	0	13,86
709	0	314	3	0	13,75
710	0	314	4	0	13,2
711	0	315	2	1	13,1
712	0	316	2	0	11,88
715	0	318	1	0	11,6
716	0	318	2	0	11,5
717	0	318	4	0	11,9
718	0	318	7	0	11,5
719	0	318	9	0	11,7
720	0	319	2	1	11,2
721	0	319	3	1	10,3
722	0	319	4	1	9,9
723	0	319	5	1	10,2
724	0	319	6	1	10
725	0	319	9	1	9,5
726	0	319	10	1	9,5
727	0	319	11	1	9,7
728	0	319	12	1	10,2
729	0	319	13	1	10,2
730	0	320	0	1	15
731	0	321	0	0	8,25
732	0	321	3	0	9,57
733	0	322	0	0	14,3
734	0	322	1	0	12,9
735	0	323	0	0	14,3
736	0	323	4	0	14
737	0	324	3	0	12,98
738	0	325	2	0	14,41
739	0	326	0	1	13,7
740	0	326	1	1	11,9
741	0	326	2	1	11,1
742	0	326	3	1	12,3
743	0	326	4	1	11,8
744	0	327	1	0	13,1
745	0	328	2	1	11,1
746	0	328	3	1	11,7
747	0	329	0	0	13,97
748	0	329	1	0	13,64
749	0	329	2	0	13,2
750	0	329	3	0	12,87
751	0	330	0	0	15,5
752	0	331	8	1	10
753	0	331	9	1	10,1
754	0	331	10	1	10,4
755	0	331	11	1	10,6
756	0	331	14	1	9,5
757	0	331	15	1	9,7
758	0	331	16	1	8,7
759	0	331	17	1	8,6
760	0	331	18	1	9,6
761	0	332	0	1	17,6
762	0	332	0	1	17,2
763	0	333	5	1	12,54
764	0	333	6	1	12,21
765	0	333	7	1	12,65
766	0	334	2	0	13,3
767	0	334	3	0	13,6
768	0	335	10	1	9,57
769	0	335	11	1	10,23
770	0	335	12	1	9,46
771	0	335	13	1	10,56
772	0	335	14	1	9,02
773	0	335	19	1	10,67
774	0	335	20	1	11,22
775	0	335	21	1	11,55
776	0	336	1	1	11,9
777	0	337	0	0	14,7
778	0	338	3	0	14,3
779	0	339	0	0	15,62
780	0	340	0	0	14,1
781	0	341	9	1	8,91
782	0	341	12	1	9,79
783	0	341	13	1	9,02
784	0	341	14	1	8,03
785	0	341	15	1	9,9
786	0	341	16	1	8,8
787	0	341	21	1	9,9
788	0	341	22	1	11,22
789	0	341	23	1	10,45
790	0	342	0	0	10,5
791	0	343	3	0	13,4
792	0	344	0	0	11,44
793	0	345	2	1	11,33
794	0	346	0	0	14,63
795	0	346	3	0	11,77
796	0	347	10	0	14,1
797	0	347	11	0	14,6
798	0	348	3	1	8,9
799	0	348	6	1	9,8
800	0	349	4	1	11,6
801	0	349	4	1	12,1
802	0	349	5	1	11
803	0	349	6	1	11
804	0	349	7	1	11,1
805	0	349	12	1	11,3
806	0	349	13	1	10,7
807	0	349	14	1	10,3
808	0	349	15	1	10,7
809	0	350	5	1	11,7
810	0	350	8	1	11,5
811	0	350	9	1	11,2
812	0	350	10	1	11,2
813	0	350	11	1	11,3
814	0	350	12	1	10,6
815	0	350	17	1	11
816	0	350	18	1	12
817	0	350	19	1	11,2
818	0	351	5	0	15,1
819	0	352	0	0	14,19
820	0	352	2	0	13,31
821	0	353	2	1	14,5
822	0	353	3	1	13,4
823	0	353	4	1	13,8
824	0	354	3	0	14,5
825	0	355	1	1	14,1
826	0	355	5	1	11,7
827	0	355	6	1	11,1
828	0	355	7	1	11
829	0	355	8	1	10,5
830	0	355	11	1	10
831	0	355	12	1	9,3
832	0	355	13	1	8,4
833	0	355	14	1	9,2
834	0	355	15	1	9,7
835	0	356	2	1	12,8
836	0	356	5	1	12,5
837	0	356	6	1	11,5
838	0	356	7	1	11,1
839	0	356	8	1	10,4
840	0	356	9	1	10,7
841	0	356	12	1	10,8
842	0	356	13	1	10,6
843	0	356	14	1	10,7
844	0	356	15	1	11,5
845	0	356	16	1	11,2
846	0	357	0	0	13,2
847	0	358	0	0	12,43
848	0	359	1	0	12,87
849	0	359	3	0	12,54
850	0	359	9	0	13,09
851	0	360	1	1	13,53
852	0	360	2	1	13,42
853	0	360	3	1	13,97
854	0	360	4	1	12,54
855	0	360	7	1	11,66
856	0	360	8	1	11,99
857	0	360	9	1	8,36
858	0	360	10	1	13,09
859	0	360	10	1	12,76
860	0	360	11	1	12,76
861	0	361	1	1	15,3
862	0	361	2	1	14
863	0	361	9	1	11,3
864	0	361	10	1	9,7
865	0	361	11	1	11,5
866	0	362	0	0	15,3
867	0	363	2	0	13,8
868	0	364	4	0	12,1
869	0	364	6	0	11,33
870	0	365	0	0	15,8
871	0	365	5	0	10,7
872	0	365	6	0	10,8
873	0	365	7	0	9,8
874	0	365	8	0	9,8
875	0	365	9	0	9,3
876	0	366	3	0	14,2
877	0	367	0	0	12,3
878	0	367	2	0	11,3
879	0	368	10	1	11,33
880	0	369	3	0	13,4
881	0	369	5	0	13
882	0	369	8	0	13
883	0	370	0	0	15,4
884	0	371	0	0	15,95
885	0	372	5	0	13,2
886	0	373	0	0	14,5
887	0	374	0	0	10,5
888	0	375	0	0	11,7
889	0	375	2	0	10,6
890	0	375	6	0	10,5
891	0	376	0	0	13,3
892	0	376	0	0	13,9
893	0	377	0	1	15,9
894	0	377	1	1	15,4
895	0	377	2	1	13,5
896	0	377	5	1	11
897	0	377	6	1	11,1
898	0	377	7	1	10,9
899	0	377	8	1	11
900	0	377	9	1	10,6
901	0	378	0	1	15,18
902	0	378	2	1	11,99
903	0	378	3	1	11,44
904	0	378	6	1	9,68
905	0	378	7	1	9,57
906	0	378	8	1	9,46
907	0	378	9	1	9,57
908	0	378	10	1	9,13
909	0	379	0	0	15,4
910	0	380	0	0	15,2
911	0	381	2	0	14,2
912	0	382	2	1	11,77
913	0	383	4	0	12,98
914	0	384	1	1	9,02
915	0	384	2	1	9,79
916	0	384	5	1	9,35
917	0	384	6	1	8,8
918	0	384	7	1	11,99
919	0	384	8	1	9,24
920	0	384	8	1	9,02
921	0	385	1	1	14,9
922	0	386	0	0	12,98
923	0	386	1	0	13,2
924	0	387	4	0	15,1
925	0	388	1	0	14,19
926	0	389	2	0	13,3
927	0	389	6	0	13,2
928	0	390	2	0	10,01
929	0	390	6	0	10,45
930	0	390	10	0	11,33
931	0	391	0	1	10,3
932	0	392	2	1	12,32
933	0	392	5	1	11,77
934	0	393	5	0	13,9
935	0	394	2	0	13,6
936	0	395	2	0	12,54
937	0	396	2	0	12,8
938	0	397	2	0	14,6
939	0	397	5	0	13,1
940	0	398	6	0	10,9
941	0	399	2	0	13,5
942	0	400	0	0	18,48
943	0	400	1	0	15,18
944	0	400	4	0	15,07
945	0	401	4	1	11,4
946	0	401	5	1	11,1
947	0	401	6	1	10,5
948	0	401	7	1	11
949	0	401	8	1	10,7
950	0	402	3	0	11,7
951	0	403	2	0	15,9
952	0	404	2	0	14,7
953	0	405	2	1	12,43
954	0	405	5	1	13,42
955	0	405	5	1	14,19
956	0	405	6	1	12,21
957	0	406	0	1	15,18
958	0	406	2	1	13,53
959	0	406	3	1	12,32
960	0	406	4	1	12,21
961	0	407	2	0	10,9
962	0	407	6	0	11,1
963	0	407	7	0	10,9
964	0	407	9	0	12
965	0	407	13	0	10,2
966	0	408	0	0	14
967	0	408	3	0	12,7
968	0	409	2	0	8,9
969	0	409	5	0	9,1
970	0	410	0	0	14,8
971	0	410	2	0	14,3
972	0	411	0	0	15,18
973	0	412	2	1	12,32
974	0	412	5	1	11,88
975	0	412	6	1	11
976	0	413	0	1	13,3
977	0	413	3	1	10,7
978	0	413	4	1	10,2
979	0	413	5	1	10,4
980	0	413	6	1	10,4
981	0	413	7	1	10,3
982	0	414	1	0	13,42
983	0	415	1	0	14,74
984	0	416	0	0	15,95
985	0	416	1	0	15,18
986	0	417	0	0	14,08
987	0	417	1	0	13,42
988	0	417	2	0	13,75
989	0	417	4	0	13,09
990	0	417	7	0	12,76
991	0	417	9	0	13,2
992	0	418	13	0	13,09
993	0	418	14	0	11,99
994	0	418	17	0	11,44
995	0	418	18	0	10,89
996	0	418	19	0	11,44
997	0	418	21	0	10,78
998	0	418	24	0	11,22
999	0	418	26	0	12,1
1000	0	419	0	0	12,8
1001	0	419	2	0	11,7
1002	0	419	3	0	12,5
1003	0	420	0	1	16,39
1004	0	420	1	1	15,51
1005	0	421	0	1	7,6
1006	0	421	0	1	7
1007	0	422	0	1	13,6
1008	0	422	1	1	11,5
1009	0	422	2	1	12,9
1010	0	423	0	1	17,7
1011	0	423	2	1	15,2
1012	0	423	4	1	16,2
1013	0	424	0	0	14
1014	0	424	1	0	13,6
1015	0	424	5	0	14,5
1016	0	424	7	0	13,6
1017	0	425	12	1	16,3
1018	0	426	0	1	14,7
1019	0	427	0	1	15
1020	0	427	1	1	14,4
1021	0	428	0	0	14,9
1022	0	428	3	0	14,6
1023	0	428	4	0	14,9
1024	0	428	6	0	14,5
1025	0	429	0	1	13,97
1026	0	429	1	1	13,42
1027	0	429	2	1	12,54
1028	0	429	5	1	12,65
1029	0	429	8	1	12,32
1030	0	429	11	1	11,77
1031	0	430	1	1	11,7
1032	0	431	0	0	16,5
1033	0	432	0	0	15
1034	0	432	1	0	13,1
1035	0	432	3	0	13,8
1036	0	433	0	0	14,2
1037	0	433	1	0	12,6
1038	0	433	2	0	12,5
1039	0	434	0	0	13
1040	0	434	1	0	10,8
1041	0	434	3	0	10,3
1042	0	434	5	0	10,9
1043	0	434	7	0	11,4
1044	0	435	8	0	13
1045	0	435	11	0	12,3
1046	0	436	0	1	15
1047	0	437	0	1	15,3
1048	0	437	2	1	13,7
1049	0	438	0	0	17,05
1050	0	438	2	0	15,62
1051	0	438	4	0	16,72
1052	0	439	0	1	14,63
1053	0	439	2	1	13,75
1054	0	440	2	0	15,62
1055	0	441	0	0	12,43
1056	0	441	1	0	12,54
1057	0	441	3	0	12,76
1058	0	442	0	1	16,28
1059	0	442	1	1	15,84
1060	0	442	2	1	16,28
1061	0	442	3	1	15,4
1062	0	442	6	1	16,72
1063	0	443	0	1	15,6
1064	0	443	2	1	13,9
1065	0	443	4	1	12,6
1066	0	443	5	1	12,9
1067	0	444	0	1	15,07
1068	0	444	1	1	12,87
1069	0	445	0	0	9,8
1070	0	445	1	0	9,3
1071	0	445	6	0	8,9
1072	0	445	8	0	8,9
1073	0	445	10	0	9,5
1074	0	445	13	0	8,6
1075	0	446	2	1	13,3
1076	0	446	6	1	14
1077	0	446	8	1	14,1
1078	0	446	11	1	13,2
1079	0	446	18	1	10,9
1080	0	446	20	1	11,8
1081	0	447	1	0	11,11
1082	0	447	3	0	11,44
1083	0	447	6	0	12,1
1084	0	447	8	0	11,88
1085	0	447	10	0	11,77
1086	0	447	13	0	13,53
1087	0	448	0	0	17,8
1088	0	448	2	0	15,7
1089	0	449	0	0	14,7
1090	0	449	1	0	13,8
1091	0	449	4	0	13,8
1092	0	449	6	0	12,6
1093	0	449	8	0	13,7
1094	0	450	0	0	14,74
1095	0	450	2	0	13,97
1096	0	450	3	0	14,85
1097	0	450	5	0	13,97
1098	0	451	0	0	16,61
1099	0	452	0	1	14,8
1100	0	453	0	1	15,5
1101	0	453	4	1	15,3
1102	0	453	6	1	14,5
1103	0	453	8	1	14,3
1104	0	454	7	0	13,5
1105	0	454	10	0	14,4
1106	0	455	0	1	15,4
1107	0	455	2	1	14,08
1108	0	455	4	1	14,08
1109	0	456	0	0	15,4
1110	0	456	4	0	12,4
1111	0	457	1	0	13,3
1112	0	457	3	0	13,8
1113	0	457	5	0	13
1114	0	457	8	0	11,9
1115	0	457	10	0	12,3
1116	0	457	12	0	12,7
1117	0	458	0	0	15,07
1118	0	458	1	0	13,31
1119	0	459	0	1	13,6
1120	0	460	0	1	16,5
1121	0	460	2	1	15,6
1122	0	461	0	0	15,3
1123	0	461	3	0	13,2
1124	0	462	1	0	11
1125	0	463	0	1	13,6
1126	0	464	0	0	15,51
1127	0	464	1	0	15,51
1128	0	464	3	0	15,51
1129	0	465	0	0	13,09
1130	0	465	3	0	13,09
1131	0	466	0	0	13,7
1132	0	467	0	0	13,86
1133	0	468	0	1	14,3
1134	0	468	1	1	13,2
1135	0	469	0	0	13
1136	0	469	1	0	11
1137	0	470	0	0	14,7
1138	0	471	0	0	15,2
1139	0	471	1	0	14,8
1140	0	471	4	0	14,4
1141	0	472	0	1	11,6
1143	0	472	11	1	9,8
1144	0	472	13	1	11,6
1145	0	473	0	1	12,7
1146	0	473	1	1	10,7
1147	0	473	3	1	10,7
1148	0	474	3	0	12,8
1149	0	474	5	0	13,3
1150	0	475	0	1	16,28
1151	0	476	0	0	9,13
1152	0	476	1	0	9,35
1153	0	477	0	1	11,9
1154	0	477	4	1	12,6
1155	0	477	6	1	11,8
1156	0	477	8	1	11,8
1157	0	477	10	1	11,3
1158	0	478	0	0	15,8
1159	0	478	1	0	14,9
1160	0	478	4	0	15,9
1161	0	479	0	0	14,74
1162	0	479	2	0	12,54
1163	0	479	4	0	12,65
1164	0	479	7	0	14,08
1165	0	480	0	0	16,1
1166	0	480	1	0	14,6
1167	0	480	4	0	12,6
1168	0	480	6	0	12,1
1169	0	481	0	0	15,6
1170	0	482	0	0	16,39
1171	0	483	2	1	11,9
1172	0	484	0	0	15,4
1173	0	484	1	0	14,5
1174	0	485	0	0	17,16
1175	0	485	2	0	16,06
1176	0	485	5	0	15,29
1177	0	485	7	0	15,18
1178	0	485	9	0	15,18
1179	0	486	0	0	14,52
1180	0	486	3	0	15,51
1181	0	487	0	1	15,18
1182	0	487	1	1	14,3
1183	0	487	3	1	11,88
1184	0	487	5	1	10,89
1185	0	488	0	1	14,5
1186	0	488	2	1	11,4
1187	0	488	4	1	12
1188	0	488	7	1	12,5
1189	0	489	0	0	15,4
1190	0	489	4	0	13,6
1191	0	490	4	0	12,65
1192	0	490	7	0	14,19
1193	0	491	1	1	14,1
1194	0	491	2	1	14,4
1195	0	491	3	1	13,7
1196	0	491	6	1	14,6
1197	0	491	8	1	14,5
1198	0	491	10	1	13,5
1199	0	492	0	0	11,5
1200	0	492	1	0	13,6
1201	0	493	0	0	15,7
1202	0	493	1	0	13,5
1203	0	494	0	0	16
1204	0	494	2	0	15
1205	0	494	3	0	14,6
1206	0	495	0	1	16,1
1207	0	495	2	1	15,1
1208	0	495	4	1	14,7
1209	0	495	6	1	14,3
1210	0	495	6	1	14
1211	0	495	7	1	13,8
1212	0	496	0	1	17,5
1213	0	496	1	1	16,3
1214	0	497	9	1	12,7
1215	0	497	12	1	13
1216	0	498	0	0	15,95
1217	0	498	1	0	15,07
1218	0	498	3	0	14,3
1219	0	498	5	0	14,85
1220	0	499	0	0	15,07
1221	0	500	0	1	13,9
1222	0	500	1	1	13,9
1223	0	500	2	1	13,6
1224	0	500	4	1	13,7
1225	0	500	7	1	13,7
1226	0	500	9	1	14,9
1227	0	501	0	0	14,7
1228	0	501	4	0	14,4
1229	0	501	6	0	15,3
1230	0	501	8	0	14,4
1231	0	501	11	0	13,9
1232	0	502	0	0	14,63
1233	0	503	0	1	12,5
1234	0	503	1	1	11,2
1235	0	504	0	0	14,7
1236	0	504	13	0	13,6
1237	0	504	15	0	12,7
1238	0	504	18	0	11,9
1239	0	505	0	0	14,4
1240	0	506	0	1	12,7
1241	0	506	2	1	12,9
1242	0	507	0	0	10,7
1243	0	507	7	0	10,9
1244	0	508	0	0	13,5
1245	0	509	0	0	15,4
1246	0	510	0	0	15,4
1247	0	510	2	0	16,2
1248	0	510	4	0	15,4
1249	0	510	7	0	15,2
1250	0	511	0	1	13,8
1251	0	511	1	1	12,9
1252	0	512	0	0	13,86
1253	0	512	1	0	12,43
1254	0	512	3	0	11,88
1255	0	512	5	0	12,21
1256	0	512	8	0	13,42
1257	0	512	12	0	13,86
1258	0	513	0	1	11
1259	0	513	1	1	10,6
1260	0	513	3	1	10,3
1261	0	514	0	1	12,76
1262	0	514	1	1	11,44
1263	0	514	3	1	13,09
1264	0	514	7	1	11,99
1265	0	514	10	1	10,89
1266	0	514	11	1	11,33
1267	0	514	14	1	11,33
1268	0	514	16	1	11,77
1269	0	515	1	0	13,7
1270	0	515	4	0	13,5
1271	0	516	0	0	15,18
1272	0	516	1	0	13,42
1273	0	516	2	0	14,74
1274	0	516	4	0	14,08
1275	0	516	7	0	13,86
1276	0	517	0	0	12,76
1277	0	517	1	0	12,21
1278	0	517	3	0	11,55
1279	0	517	5	0	11,22
1280	0	517	9	0	10,34
1281	0	517	10	0	10,89
1282	0	518	0	1	12,9
1283	0	519	0	0	14,6
1284	0	519	4	0	15
1285	0	519	6	0	14,3
1286	0	519	8	0	14,3
1287	0	520	0	0	14,52
1288	0	520	3	0	13,31
1289	0	520	5	0	13,64
1290	0	520	8	0	14,08
1291	0	521	0	0	12,76
1292	0	522	0	0	14,52
1293	0	522	3	0	12,87
1294	0	523	0	0	13,97
1295	0	523	1	0	12,76
1296	0	524	0	1	13,42
1297	0	525	0	1	15,8
1298	0	525	1	1	15,2
1299	0	525	3	1	14
1300	0	526	0	0	16
1301	0	526	1	0	14,6
1302	0	527	0	0	13,9
1303	0	527	3	0	12,2
1304	0	527	4	0	12,1
1305	0	527	6	0	12
1306	0	527	8	0	11,9
1307	0	527	11	0	12
1308	0	528	0	1	11,9
1309	0	528	2	1	10,5
1310	0	529	0	0	14,1
1311	0	529	3	0	12,4
1312	0	529	6	0	13
1313	0	529	8	0	13,1
1314	0	529	13	0	13,2
1315	0	530	0	1	14,1
1316	0	530	2	1	11,2
1317	0	530	8	1	10,8
1318	0	531	0	0	15,2
1319	0	532	0	0	16
1320	0	533	0	0	14,08
1321	0	533	1	0	12,87
1322	0	533	4	0	13,75
1323	0	533	6	0	12,98
1324	0	534	0	1	14,8
1325	0	534	2	1	14,7
1326	0	534	4	1	14,9
1327	0	534	5	1	13,5
1328	0	534	7	1	14,4
1329	0	535	0	1	15
1330	0	536	0	0	14,1
1331	0	536	2	0	12,9
1332	0	537	0	0	14
1333	0	537	2	0	12,6
1334	0	537	4	0	12
1335	0	537	7	0	12,7
1336	0	538	0	0	14,96
1337	0	539	0	0	13,8
1338	0	539	1	0	12,9
1339	0	539	3	0	12,2
1340	0	539	5	0	12,5
1341	0	540	0	0	14,6
1342	0	540	2	0	12,9
1343	0	540	4	0	13,6
1344	0	540	5	0	13,4
1345	0	541	0	1	12,2
1346	0	541	1	1	12,3
1347	0	542	0	0	15,51
1348	0	542	4	0	13,64
1349	0	543	0	0	14,41
1350	0	544	0	0	15,2
1351	0	544	1	0	13,7
1352	0	544	3	0	14
1353	0	544	4	0	14,3
1354	0	544	6	0	14,4
1355	0	545	0	0	14,9
1356	0	545	2	0	14,6
1357	0	546	0	0	11,1
1358	0	547	0	1	15,62
1359	0	547	7	1	11,99
1360	0	547	7	1	12,43
1361	0	547	8	1	12,32
1362	0	547	9	1	12,1
1363	0	547	10	1	13,09
1364	0	547	11	1	12,1
1365	0	547	12	1	12,21
1366	0	547	13	1	12,76
1367	0	547	14	1	12,32
1368	0	547	15	1	11,88
1369	0	547	16	1	12,1
1370	0	548	0	1	10,4
1371	0	548	2	0	10
1372	0	549	0	0	14,1
1373	0	549	5	0	13,7
1374	0	549	9	0	14
1375	0	549	13	0	14,5
1376	0	549	15	0	12,6
1377	0	549	16	0	13,1
1378	0	549	19	0	13
1379	0	550	0	0	13,8
1380	0	551	0	0	12
1381	0	551	2	0	12
1382	0	551	6	0	11,5
1383	0	551	9	0	11,8
1384	0	552	0	0	15
1385	0	552	5	0	13,7
1386	0	552	7	0	13,6
1387	0	552	8	0	12,9
1388	0	553	0	0	13,5
1389	0	553	2	0	12,9
1390	0	554	0	1	11
1391	0	554	4	1	10,8
1392	0	554	5	1	9,7
1393	0	554	6	1	10,1
1394	0	554	7	1	9,6
1395	0	554	8	1	10,1
1396	0	554	9	1	9,9
1397	0	554	10	1	10,2
1398	0	554	11	1	9,9
1399	0	555	0	1	13,09
1400	0	555	3	1	13,64
1401	0	555	4	1	14,3
1402	0	555	5	1	13,2
1403	0	555	6	1	11,55
1404	0	555	7	1	11,33
1405	0	555	8	1	12,21
1406	0	555	9	1	11,99
1407	0	555	10	1	11,99
1408	0	555	11	1	11,55
1409	0	555	12	1	11,44
1410	0	556	0	1	13,64
1411	0	556	4	1	11,22
1412	0	556	5	1	10,78
1413	0	556	6	1	10,67
1414	0	556	7	1	10,89
1415	0	556	8	1	10,12
1416	0	556	9	1	10,34
1417	0	556	10	1	11,33
1418	0	556	11	1	10,56
1419	0	556	12	1	10,56
1420	0	556	13	1	11
1421	0	557	0	1	10,7
1422	0	557	2	1	10,6
1423	0	558	0	1	15,07
1424	0	558	0	1	14,41
1425	0	558	1	1	13,86
1426	0	558	2	1	13,97
1427	0	558	3	1	14,74
1428	0	558	4	1	13,64
1429	0	558	4	1	13,64
1430	0	558	5	1	13,09
1431	0	558	6	1	12,54
1432	0	558	7	1	12,32
1433	0	558	8	1	12,76
1434	0	559	0	1	13,4
1435	0	559	0	1	13,5
1436	0	559	2	1	14,8
1437	0	559	2	1	13,2
1438	0	559	3	1	13,8
1439	0	559	4	1	13,7
1440	0	559	5	1	12,7
1441	0	559	6	1	13
1442	0	559	7	1	12
1443	0	559	8	1	10,5
1444	0	559	9	1	11,2
1445	0	560	0	1	13,3
1446	0	560	1	1	13,2
1447	0	560	2	1	12,2
1448	0	560	3	1	12,4
1449	0	560	4	1	12,7
1450	0	560	5	1	11,9
1451	0	560	6	1	12,5
1452	0	560	7	1	11,4
1453	0	560	8	1	11,5
1454	0	560	9	1	11
1455	0	560	10	1	10,5
1456	0	561	0	0	16,3
1457	0	561	1	0	16,1
1458	0	561	2	0	14,1
1459	0	561	7	0	13,9
1460	0	562	0	0	14,7
1461	0	562	3	0	14,3
1462	0	563	0	0	15,3
1463	0	563	1	0	14,4
1464	0	563	2	0	14,7
1465	0	564	0	0	16,2
1466	0	564	5	0	15,3
1467	0	564	7	0	13,8
1468	0	565	0	0	15,84
1469	0	565	2	0	14,74
1470	0	565	4	0	14,85
1471	0	565	7	0	14,63
1472	0	566	0	1	14,63
1473	0	566	2	1	13,2
1474	0	566	4	1	12,76
1475	0	566	5	1	14,3
1476	0	566	5	1	12,65
1477	0	566	5	1	12,32
1478	0	566	6	1	11,99
1479	0	566	7	1	11,33
1480	0	566	10	1	9,02
1481	0	566	11	1	8,36
1482	0	567	0	1	11,5
1483	0	567	4	1	11
1484	0	567	5	1	10,9
1485	0	567	6	1	11,7
1486	0	567	7	1	11
1487	0	567	8	1	11
1488	0	567	9	1	10,1
1489	0	567	10	1	10,5
1490	0	567	11	1	10,4
1491	0	567	12	1	10,6
1492	0	567	13	1	10,7
1493	0	568	0	0	15,9
1494	0	568	1	0	15,2
1495	0	569	0	0	16,3
1496	0	569	1	0	15,7
1497	0	569	1	0	15,2
1498	0	570	0	0	14,6
1499	0	570	1	0	15
1500	0	570	3	0	14,7
1501	0	571	0	0	14,19
1502	0	571	1	0	12,87
1503	0	571	2	0	12,65
1504	0	571	3	0	12,32
1505	0	572	0	1	15,9
1506	0	572	1	1	16,3
1507	0	573	4	1	10,4
1508	0	574	2	0	13,7
1509	0	574	4	0	13,2
1510	0	574	6	0	12,6
1511	0	574	11	0	12,9
1512	0	574	13	0	11,2
1513	0	574	15	0	11,5
1514	0	574	17	0	11,4
1515	0	575	4	0	13,2
1516	0	576	13	0	14,4
1517	0	577	5	1	10,9
1518	0	577	7	1	10,9
1519	0	577	10	1	10,8
1520	0	578	4	0	11,77
1521	0	579	5	0	11
1522	0	579	9	0	11,3
1523	0	579	11	0	10,8
1524	0	579	13	0	10,7
1525	0	579	16	0	9,8
1526	0	580	0	1	13,1
1527	0	580	5	1	11,8
1528	0	581	2	1	12,9
1529	0	581	4	1	12,4
1530	0	581	7	1	11,5
1531	0	581	9	1	10,8
1532	0	581	11	1	9,9
1533	0	581	14	1	9,6
1534	0	582	1	1	15,4
1535	0	582	3	1	14,74
1536	0	582	4	1	13,53
1537	0	582	6	1	14,08
1538	0	582	8	1	13,09
1539	0	583	1	1	15,62
1540	0	583	2	1	16,06
1541	0	583	3	1	15,07
1542	0	583	5	1	12,76
1543	0	583	8	1	11,77
1544	0	583	10	1	12,1
1545	0	583	10	1	11,22
1546	0	583	12	1	11,22
1547	0	583	15	1	11,88
1548	0	584	1	0	14,3
1549	0	584	6	0	12,1
1550	0	584	9	0	13,64
1551	0	584	13	0	14,63
1552	0	585	1	0	11,4
1553	0	585	3	0	12,5
1554	0	585	5	0	12
1555	0	586	0	0	12,1
1556	0	586	2	0	13,09
1557	0	587	0	1	15,73
1558	0	587	2	1	13,31
1559	0	587	4	1	13,09
1560	0	587	5	1	13,86
1561	0	587	7	1	12,43
1562	0	587	9	1	12,87
1563	0	587	12	1	11,99
1564	0	588	1	0	12,32
1565	0	588	3	0	13,31
1566	0	589	1	0	14,52
1567	0	589	3	0	14,74
1568	0	590	1	0	14,74
1569	0	590	2	0	14,74
1570	0	590	5	0	14,52
1571	0	590	7	0	14,63
1572	0	591	0	0	13,6
1573	0	591	1	0	13,8
1574	0	591	2	0	13,3
1575	0	591	4	0	13,5
1576	0	592	0	0	15,4
1577	0	592	5	0	15,2
1578	0	592	7	0	14,2
1579	0	592	9	0	13,9
1580	0	592	11	0	14,1
1581	0	593	0	0	15,3
1582	0	593	3	0	12,7
1583	0	594	1	1	13,4
1584	0	594	2	1	14,2
1585	0	594	5	1	13,5
1586	0	594	5	1	13,8
1587	0	594	7	1	12,7
1588	0	594	9	1	12,8
1589	0	594	12	1	13,1
1590	0	595	0	0	13,9
1591	0	595	2	0	13,5
1592	0	596	0	0	11,1
1593	0	596	8	0	12
1594	0	596	9	0	11,7
1595	0	597	0	1	14,41
1596	0	597	2	1	12,76
1597	0	598	0	0	15,29
1598	0	598	2	0	15,4
1599	0	599	0	0	15,62
1600	0	599	1	0	13,2
1601	0	599	2	0	12,76
1602	0	599	4	0	12,87
1603	0	599	6	0	13,75
1604	0	599	8	0	13,64
1605	0	599	9	0	12,98
1606	0	599	11	0	13,75
1607	0	600	0	0	14,41
1608	0	600	1	0	13,75
1609	0	600	3	0	13,09
1610	0	601	0	0	13,09
1611	0	601	2	0	11,55
1612	0	601	4	0	11,66
1613	0	602	1	0	11,4
1614	0	602	3	0	9,6
1615	0	602	4	0	10,7
1616	0	602	6	0	10,2
1617	0	602	8	0	10,5
1618	0	602	10	0	10,5
1619	0	603	2	1	14,5
1620	0	603	4	1	12,7
1621	0	603	6	1	11,5
1622	0	603	7	1	12,5
1623	0	603	8	1	12,1
1624	0	603	9	1	11,5
1625	0	603	10	1	11,1
1626	0	603	11	1	11
1627	0	604	0	1	15,3
1628	0	604	3	1	12,2
1629	0	604	5	1	11,4
1630	0	604	7	1	11,2
1631	0	605	1	1	11,3
1632	0	605	4	1	11,2
1633	0	605	7	1	7,7
1634	0	605	9	1	12,8
1635	0	606	1	0	14,52
1636	0	606	2	0	15,18
1637	0	607	0	0	12,8
1638	0	607	1	0	11,8
1639	0	607	2	0	11,1
1640	0	607	4	0	12
1641	0	607	6	0	11,4
1642	0	607	8	0	11,4
1643	0	608	0	1	16,4
1644	0	608	2	1	17,7
1645	0	608	4	1	17,5
1646	0	609	0	1	13,75
1647	0	609	1	1	13,09
1648	0	609	3	1	14,63
1649	0	609	5	1	12,54
1650	0	609	5	1	13,42
1651	0	610	0	1	13,2
1652	0	610	2	1	11,66
1653	0	610	4	1	13,09
1654	0	610	5	1	12,43
1655	0	610	7	1	11,77
1656	0	610	10	1	9,13
1657	0	611	0	0	12,65
1658	0	611	2	0	12,54
1659	0	612	0	0	15,4
1660	0	612	2	0	13,2
1661	0	612	4	0	14,3
1662	0	613	0	1	15,6
1663	0	613	1	1	13,9
1664	0	613	6	1	15
1665	0	613	9	1	12,2
1666	0	614	0	0	13,64
1667	0	614	8	0	11,44
1668	0	614	10	0	10,78
1669	0	614	12	0	10,56
1670	0	614	14	0	10,45
1671	0	614	16	0	11,22
1672	0	614	18	0	11,22
1673	0	615	1	0	12,1
1674	0	615	2	0	12
1675	0	615	4	0	11,7
1676	0	616	1	1	9,24
1677	0	616	3	1	8,47
1678	0	616	4	1	9,13
1679	0	616	6	1	10,56
1680	0	617	0	1	16,61
1681	0	617	1	1	15,95
1682	0	617	3	1	15,18
1683	0	617	5	1	15,29
1684	0	618	2	0	10,01
1685	0	618	4	0	9,35
1686	0	618	6	0	9,35
1687	0	618	8	0	9,79
1688	0	619	2	0	14,4
1689	0	619	4	0	14,6
1690	0	620	3	1	13,7
1691	0	620	3	1	13,5
1692	0	620	5	1	12
1693	0	620	8	1	11,2
1694	0	621	2	1	11,4
1695	0	622	0	0	16,1
1696	0	622	5	0	13,7
1697	0	623	0	0	16,94
1698	0	623	2	0	14,19
1699	0	623	4	0	15,18
1700	0	623	6	0	15,07
1701	0	624	0	1	14,8
1702	0	624	1	1	11,8
1703	0	624	3	1	14,4
1704	0	625	0	1	17,8
1705	0	625	2	1	11,3
1706	0	625	3	1	11,1
1707	0	625	4	1	11,2
1708	0	625	7	1	11,2
1710	0	627	0	0	15,95
1711	0	627	1	0	15,62
1712	0	627	3	0	15,4
1713	0	627	5	0	14,96
1714	0	628	0	0	13
1715	0	628	1	0	13,4
1716	0	628	3	0	12,6
1717	0	629	0	0	14,4
1718	0	629	1	0	13,4
1719	0	629	5	0	12,6
1720	0	630	0	0	14,8
1721	0	630	1	0	15,1
1722	0	630	3	0	13
1723	0	631	0	0	15,2
1724	0	631	2	0	14,5
1725	0	631	4	0	14,2
1726	0	631	6	0	15
1727	0	632	0	0	16,2
1728	0	632	2	0	13,7
1729	0	632	4	0	13,4
1730	0	632	6	0	13,9
1731	0	633	0	0	16,3
1732	0	633	3	0	16
1733	0	633	5	0	14,6
1734	0	633	7	0	14,8
1735	0	634	0	1	14,7
1736	0	634	2	1	16,1
1737	0	634	5	1	13,6
1738	0	634	8	1	11,9
1739	0	635	0	0	15,7
1740	0	635	5	0	15,2
1741	0	635	6	0	13,7
1742	0	636	0	0	15,7
1743	0	636	1	0	14,7
1744	0	636	3	0	13,9
1745	0	636	5	0	13,6
1746	0	637	0	0	15,3
1747	0	637	2	0	13,4
1748	0	637	4	0	13,5
1749	0	638	0	0	15,6
1750	0	638	2	0	14,8
1751	0	639	0	0	16,3
1752	0	639	1	0	16
1753	0	639	3	0	14,8
1754	0	640	0	1	10,9
1755	0	640	2	1	11,5
1756	0	640	6	1	11,5
1757	0	640	8	1	11,6
1758	0	641	0	1	13,3
1759	0	641	1	1	14,1
1760	0	642	0	0	17,27
1761	0	642	5	0	16,39
1762	0	642	7	0	16,28
1763	0	643	0	0	15,51
1764	0	643	1	0	13,64
1765	0	643	3	0	13,53
1766	0	643	5	0	13,75
1767	0	643	7	0	13,31
1768	0	644	0	0	14,85
1769	0	644	1	0	12,54
1770	0	645	0	0	15,4
1771	0	645	9	0	12,76
1772	0	645	13	0	12,54
1773	0	646	0	1	15,1
1774	0	646	2	1	14,4
1775	0	646	6	1	14,5
1776	0	647	0	1	15,5
1777	0	647	2	1	13,8
1778	0	648	0	0	14,2
1779	0	649	0	0	13,1
1780	0	649	1	0	12,2
1781	0	649	3	0	12,8
1782	0	649	6	0	13,4
1783	0	650	2	1	11,2
1784	0	651	10	0	14,41
1785	0	651	13	0	14,41
1786	0	651	16	0	13,86
1787	0	652	0	0	13,97
1788	0	652	2	0	14,41
1789	0	652	3	0	11,66
1790	0	652	5	0	11,22
1791	0	653	0	1	13,5
1792	0	653	2	1	13,1
1793	0	653	5	1	12,8
1794	0	654	0	0	15,84
1795	0	654	2	0	14,41
1796	0	655	0	0	12,7
1797	0	655	2	0	12,9
1798	0	656	0	0	16,28
1799	0	656	2	0	14,52
1800	0	656	3	0	14,96
1801	0	657	0	0	12,87
1802	0	657	2	0	12,65
1803	0	658	0	0	14,9
1804	0	658	1	0	14
1805	0	658	3	0	14,3
1806	0	658	5	0	13,9
1807	0	659	0	1	16,61
1808	0	659	4	1	14,63
1809	0	660	0	0	14,7
1810	0	660	2	0	13,3
1811	0	661	0	0	14,1
1812	0	661	2	0	13
1813	0	662	0	0	14,08
1814	0	662	1	0	13,42
1815	0	662	3	0	13,97
1816	0	663	0	1	14,4
1817	0	663	2	1	13,4
1818	0	663	4	1	12,5
1819	0	664	0	0	15
1820	0	664	2	0	13,5
1821	0	665	0	0	13,1
1822	0	665	1	0	13,4
1823	0	665	2	0	11,6
1824	0	665	4	0	12
1825	0	665	5	0	13,1
1826	0	666	0	1	15,5
1827	0	666	2	1	14,2
1828	0	666	4	1	13,5
1829	0	666	6	1	12,1
1830	0	667	0	0	15,2
1831	0	668	5	1	11,1
1832	0	669	4	0	12,5
1833	0	670	0	0	16,83
1834	0	670	3	0	14,96
1835	0	671	0	0	13
1836	0	672	0	1	15,4
1837	0	672	1	1	13,9
1838	0	672	3	1	13,3
1839	0	673	0	0	16,28
1840	0	673	3	0	14,3
1841	0	674	0	1	14,5
1842	0	674	3	1	15
1843	0	675	0	0	14,5
1844	0	676	0	1	7,3
1845	0	676	1	1	6,6
1846	0	676	3	1	7,8
1847	0	677	0	1	14
1848	0	677	2	1	13,2
1849	0	677	4	1	14
1850	0	678	0	1	13,7
1851	0	678	1	1	13,3
1852	0	678	3	1	12,3
1853	0	679	0	0	15,84
1854	0	679	2	0	14,74
1855	0	680	0	0	12,8
1856	0	680	2	0	13
1857	0	681	0	0	13,6
1858	0	681	2	0	14,2
1859	0	682	0	0	14,52
1860	0	682	1	0	13,09
1861	0	682	3	0	12,65
1862	0	683	0	0	15,73
1863	0	683	5	0	15,18
1864	0	683	6	0	14,52
1865	0	683	7	0	14,08
1866	0	684	0	0	16,72
1867	0	684	3	0	15,18
1868	0	685	0	1	15,1
1869	0	685	1	1	14,3
1870	0	685	3	1	13,5
1871	0	686	0	1	15,2
1872	0	686	1	1	13,9
1873	0	686	2	1	14,4
1874	0	686	4	1	13,9
1875	0	687	0	1	11,7
1876	0	687	3	1	10,4
1877	0	688	0	0	15,1
1878	0	688	1	0	14,5
1879	0	689	1	0	11,7
1880	0	689	3	0	11,4
1881	0	690	0	1	14,08
1882	0	690	2	1	13,64
1883	0	691	1	0	13,8
1884	0	691	2	0	13
1885	0	692	0	0	15,84
1886	0	692	2	0	14,85
1887	0	693	0	1	15,18
1888	0	693	3	1	15,62
1889	0	694	0	0	12,98
1890	0	694	1	0	12,65
1891	0	694	3	0	12,98
1892	0	695	3	1	9,6
1893	0	695	4	1	9,1
1894	0	695	5	1	9,8
1895	0	695	6	1	9
1896	0	695	7	1	8,8
1897	0	696	3	1	12,54
1898	0	696	3	1	12,21
1899	0	696	3	1	12,21
1900	0	696	3	1	10,56
1901	0	696	20	1	8,47
1902	0	696	21	1	8,25
1903	0	696	22	1	8,58
1904	0	696	23	1	8,25
1905	0	696	24	1	8,36
1906	0	697	2	0	10,9
1907	0	697	3	0	7,9
1908	0	698	20	1	7,4
1909	0	698	21	1	7,3
1910	0	698	22	1	6,6
1911	0	698	23	1	6,8
1912	0	698	24	1	7
1913	0	698	25	1	7
1914	0	698	26	1	7,5
1916	0	700	0	0	9,5
1928	0	703	2	1	10,12
1929	0	703	3	1	8,58
1930	0	703	4	1	8,8
1931	0	703	5	1	8,69
1932	0	703	6	1	8,25
1933	0	703	7	1	8,58
1934	0	703	8	1	8,47
1935	0	704	2	1	11,9
1936	0	704	3	1	11,7
1937	0	704	4	1	11,2
1938	0	704	5	1	10,2
1939	0	704	6	1	9,9
1940	0	704	7	1	10
1941	0	704	8	1	9,9
1942	0	705	1	1	9,68
1943	0	705	3	1	9,35
1944	0	705	4	1	8,91
1945	0	705	5	1	8,8
1946	0	705	6	1	9,02
1947	0	706	5	0	12
1948	0	707	3	0	14,3
1949	0	707	5	0	13,8
1950	0	708	0	0	14
1951	0	709	0	1	14,1
1952	0	709	1	1	13
1953	0	709	2	1	12,4
1954	0	709	3	1	11,8
1955	0	709	4	1	12,6
1956	0	710	1	1	12,8
1957	0	710	1	1	12
1958	0	710	2	1	11
1959	0	710	4	1	9,8
1960	0	711	3	1	12,1
1961	0	711	3	1	10,12
1962	0	711	4	1	10,89
1963	0	712	0	1	12,65
1964	0	712	1	1	12,54
1965	0	712	2	1	13,42
1966	0	712	3	1	12,98
1967	0	712	4	1	12,1
1968	0	713	0	0	12,21
1969	0	714	3	0	15,6
1970	0	715	1	0	11,9
1971	0	716	3	0	8,6
1972	0	717	0	1	14,7
1973	0	717	0	1	13,2
1974	0	717	1	1	13,6
1975	0	717	2	1	12,5
1976	0	718	0	1	12,7
1977	0	718	1	1	12,3
1978	0	718	2	1	12,3
1979	0	719	0	0	15,84
1980	0	720	0	0	12,9
1981	0	721	0	1	11
1982	0	721	1	1	10,78
1983	0	722	0	0	12,8
1984	0	723	0	1	10,7
1985	0	723	1	1	10,9
1986	0	724	1	1	9,5
1987	0	724	1	1	10
1988	0	725	0	1	11,7
1989	0	726	0	1	12,1
1991	0	728	0	0	9,35
1992	0	729	0	1	15,29
1993	0	729	0	1	14,74
1994	0	730	0	1	11,9
1995	0	730	1	1	11,3
1996	0	730	2	1	11,5
1997	0	730	3	1	10,7
1998	0	730	4	1	10,9
1999	0	731	1	0	14
2000	0	732	0	0	12,1
2001	0	733	0	1	10,4
2002	0	734	0	0	11,9
2003	0	735	4	1	11,44
2004	0	735	4	1	12,32
2005	0	735	5	1	10,67
2006	0	735	6	1	9,24
2007	0	735	7	1	9,79
2008	0	735	8	1	8,69
2009	0	735	9	1	8,47
2010	0	736	0	0	14,63
2011	0	737	0	1	12
2012	0	737	1	1	11,4
2013	0	737	2	1	11,1
2014	0	738	0	0	16,28
2015	0	739	2	1	14,6
2016	0	739	4	1	14
2017	0	740	1	0	12,87
2018	0	740	2	0	13,86
[truncated: 589 more rows]
