# Supplementary material for: A novel haemocytometric COVID-19 prognostic score developed and validated in an observational multicentre European hospital-based study
Source: eLife journal article supplement (doi:10.7554/elife.63195), 2020-11-26
Supplement: supp [file elife-63195-supp-v1.zip › elife_poa_e63195_Figure_7_source_data_1.csv]

Figure 7 – source data file 1. Source data for trends of platelet count over 14 days of hospitalisation in critical/fatal (CF) and non-critical (NC) patients
Filename	exclusion	Pat_ID	length_of_hospitalisation	Critical_or_Fatal	PLT(10^3/uL)
1	0	1	0	1	137
2	0	1	2	1	118
3	0	1	2	1	111
4	0	1	3	1	120
5	0	1	4	1	164
6	0	1	15	1	339
7	0	2	0	0	231
8	0	2	1	0	344
9	0	2	2	0	423
10	0	2	3	0	482
11	0	2	4	0	550
12	0	2	6	0	648
13	0	3	0	1	147
14	0	3	1	1	155
15	0	3	1	1	144
16	0	3	2	1	192
17	0	3	3	1	214
18	0	3	4	1	222
19	0	3	4	1	216
20	0	3	5	1	227
21	0	3	6	1	240
22	0	3	7	1	200
23	0	3	8	1	253
24	0	3	9	1	367
25	0	3	10	1	453
26	0	3	11	1	491
27	0	3	12	1	525
28	0	3	13	1	655
29	0	4	0	1	160
30	0	4	1	1	166
31	0	4	1	1	173
32	0	4	2	1	145
33	0	4	3	1	175
34	0	4	4	1	172
35	0	4	5	1	156
36	0	4	6	1	87
37	0	4	7	1	131
38	0	4	8	1	96
39	0	4	9	1	117
40	0	4	10	1	109
41	0	4	10	1	111
42	0	4	11	1	125
43	0	4	12	1	35
44	0	4	13	1	56
45	0	4	14	1	134
46	0	5	0	0	192
47	0	5	1	0	173
48	0	6	0	0	280
49	0	6	2	0	293
50	0	6	3	0	322
51	0	6	5	0	470
52	0	7	0	0	185
53	0	7	2	0	206
54	0	7	3	0	252
55	0	7	4	0	286
56	0	7	5	0	314
57	0	7	6	0	320
58	0	8	1	0	158
59	0	9	0	0	225
60	0	9	2	0	221
61	0	9	3	0	259
62	0	9	4	0	247
63	0	9	5	0	278
64	0	9	7	0	300
65	0	10	0	1	165
66	0	10	1	1	151
67	0	10	3	1	175
68	0	10	4	1	183
69	0	11	0	0	96
70	0	11	1	0	113
71	0	11	3	0	127
72	0	12	0	1	164
73	0	12	2	1	221
74	0	13	5	1	344
75	0	13	6	1	277
76	0	13	7	1	293
77	0	13	8	1	293
78	0	13	9	1	297
79	0	13	9	1	291
80	0	13	10	1	288
81	0	13	11	1	290
82	0	13	12	1	302
83	0	13	13	1	276
84	0	14	1	0	214
85	0	15	13	1	469
86	0	15	14	1	466
87	0	15	15	1	525
88	0	15	16	1	534
89	0	15	17	1	564
90	0	15	18	1	569
91	0	15	19	1	558
92	0	15	20	1	580
93	0	16	11	1	234
94	0	16	12	1	244
95	0	16	13	1	214
96	0	16	14	1	233
97	0	16	15	1	249
98	0	16	16	1	248
99	0	16	17	1	274
100	0	16	18	1	230
101	0	16	19	1	258
102	0	17	1	0	192
103	0	17	2	0	203
104	0	17	4	0	266
105	0	18	0	1	213
106	0	18	2	1	174
107	0	18	2	1	205
108	0	18	3	1	216
109	0	18	4	1	231
110	0	19	0	1	117
111	0	19	1	1	152
112	0	19	3	1	197
113	0	20	0	0	241
114	0	20	1	0	251
115	0	20	3	0	303
116	0	21	0	1	175
117	0	22	0	0	202
118	0	23	0	0	171
119	0	24	0	0	161
120	0	25	0	1	139
121	0	26	0	0	254
122	0	27	0	0	246
123	0	28	0	0	247
124	0	29	0	0	187
125	0	30	0	1	175
126	0	30	4	1	203
127	0	31	0	0	401
128	0	32	0	1	133
129	0	33	0	1	169
130	0	34	0	1	241
131	0	35	0	0	231
132	0	36	0	1	320
133	0	37	0	0	175
134	0	38	0	1	170
135	0	39	0	0	274
136	0	40	0	0	152
137	0	41	0	0	199
138	0	42	0	0	163
139	0	43	0	0	204
140	0	44	0	0	104
141	0	45	0	1	384
142	0	45	1	1	353
143	0	45	1	1	373
144	0	45	2	1	355
145	0	45	3	1	239
146	0	45	4	1	220
147	0	45	5	1	283
148	0	45	5	1	332
149	0	45	6	1	314
150	0	45	6	1	326
151	0	45	7	1	366
152	0	45	7	1	447
153	0	45	8	1	483
154	0	45	9	1	594
155	0	45	10	1	630
156	0	45	11	1	588
157	0	45	12	1	464
158	0	45	13	1	406
159	0	45	14	1	442
160	0	45	15	1	344
161	0	45	16	1	333
162	0	45	17	1	303
163	0	45	18	1	290
164	0	45	19	1	284
165	0	45	20	1	310
166	0	45	21	1	327
167	0	45	22	1	215
168	0	46	0	0	266
169	0	47	0	0	176
170	0	48	0	1	190
171	0	49	0	1	195
172	0	50	0	0	143
173	0	51	0	0	157
174	0	52	0	1	234
175	0	53	0	1	180
176	0	54	0	1	178
177	0	54	4	1	199
178	0	54	10	1	322
179	0	54	11	1	425
180	0	55	0	0	134
181	0	56	0	1	153
182	0	57	0	0	265
183	0	58	0	0	58
184	0	59	0	0	179
185	0	60	0	0	278
186	0	61	0	0	172
187	0	62	0	1	399
188	0	63	0	0	189
189	0	64	0	0	202
190	0	65	0	0	84
191	0	66	0	1	205
192	0	67	0	0	354
193	0	68	0	0	100
194	0	69	0	0	176
195	0	70	0	0	94
196	0	71	0	0	183
197	0	72	0	0	178
198	0	73	0	0	218
199	0	74	0	0	222
200	0	75	0	0	191
201	0	76	0	0	100
202	0	77	0	0	135
203	0	78	0	1	159
204	0	79	0	0	170
205	0	79	0	0	154
206	0	79	1	0	158
207	0	79	2	0	135
208	0	79	3	0	116
209	0	79	5	0	121
210	0	79	7	0	123
211	0	79	8	0	150
212	0	79	9	0	197
213	0	79	10	0	230
214	0	79	12	0	299
215	0	80	0	0	180
216	0	81	0	1	140
217	0	82	0	0	260
218	0	83	0	0	199
220	0	85	0	1	79
221	0	86	0	1	279
222	0	87	0	0	158
223	0	88	0	0	166
225	0	90	0	0	177
226	0	91	0	0	106
227	0	92	0	0	150
228	0	93	0	1	159
229	0	93	1	1	157
230	0	93	2	1	233
231	0	94	0	0	212
232	0	95	0	0	111
233	0	96	0	1	168
234	0	97	0	0	168
235	0	98	0	0	157
236	0	98	2	0	178
237	0	98	4	0	207
238	0	98	5	0	245
239	0	98	13	0	281
240	0	99	0	1	186
241	0	99	1	1	166
242	0	99	2	1	147
243	0	99	3	1	149
244	0	99	4	1	142
245	0	99	5	1	133
246	0	100	0	1	254
247	0	101	0	1	226
248	0	102	0	0	188
249	0	103	0	1	172
250	0	103	1	1	168
251	0	104	0	1	137
252	0	105	0	0	263
253	0	106	0	1	82
254	0	107	0	0	121
255	0	108	0	0	215
256	0	109	0	1	125
257	0	110	0	0	132
258	0	110	1	0	136
259	0	110	2	0	162
260	0	110	3	0	175
261	0	110	4	0	192
262	0	110	5	0	212
263	0	110	6	0	265
264	0	110	7	0	250
265	0	110	7	0	246
266	0	110	8	0	231
267	0	110	9	0	207
268	0	110	10	0	214
269	0	110	11	0	234
270	0	110	12	0	245
271	0	110	13	0	279
272	0	110	16	0	235
273	0	110	17	0	240
274	0	110	20	0	238
275	0	111	0	0	177
276	0	112	0	0	192
277	0	113	0	0	136
278	0	114	0	1	107
279	0	115	0	1	263
280	0	116	0	1	199
281	0	117	0	0	194
282	0	118	0	1	174
283	0	119	0	1	149
284	0	120	0	1	162
285	0	121	0	1	167
286	0	122	0	0	378
287	0	122	4	0	542
288	0	122	7	0	476
289	0	122	9	0	394
290	0	123	0	1	136
291	0	124	0	0	245
292	0	125	0	0	151
293	0	126	0	1	164
294	0	126	2	1	201
295	0	127	0	0	141
296	0	127	4	0	130
297	0	128	0	1	91
298	0	129	0	0	174
299	0	130	0	1	186
300	0	131	0	1	89
301	0	132	0	1	131
302	0	133	0	1	168
303	0	134	0	1	146
304	0	134	2	1	104
305	0	134	3	1	133
306	0	135	0	0	179
307	0	136	0	0	117
308	0	136	5	0	196
309	0	136	7	0	301
310	0	136	8	0	327
311	0	136	9	0	353
312	0	136	10	0	344
313	0	136	11	0	395
314	0	136	12	0	369
315	0	136	13	0	425
316	0	136	14	0	412
317	0	137	0	1	298
318	0	137	1	1	271
319	0	137	2	1	337
320	0	137	4	1	283
321	0	138	0	0	110
322	0	139	0	0	197
323	0	140	0	0	199
324	0	140	2	0	170
325	0	140	6	0	235
326	0	141	0	0	224
327	0	142	0	1	251
328	0	143	0	1	387
329	0	144	0	0	214
330	0	145	0	0	216
331	0	146	0	0	173
332	0	147	0	1	216
333	0	148	0	1	176
334	0	149	0	0	166
335	0	150	0	1	32
336	0	151	0	1	222
337	0	152	0	0	241
338	0	153	0	0	171
339	0	154	0	0	164
340	0	155	0	0	210
341	0	156	0	0	247
342	0	157	0	1	160
343	0	158	0	0	221
344	0	159	0	0	210
345	0	160	0	0	130
346	0	161	0	1	257
347	0	162	0	1	164
348	0	163	0	0	251
349	0	164	0	1	140
350	0	165	0	1	280
351	0	166	0	1	104
352	0	167	0	0	139
353	0	168	0	0	141
355	0	170	0	0	198
356	0	171	0	0	161
357	0	172	0	0	266
358	0	173	0	1	142
359	0	174	0	0	167
360	0	175	0	1	171
361	0	176	0	0	155
362	0	177	0	0	413
363	0	178	0	1	187
364	0	179	0	0	148
365	0	179	2	0	191
366	0	179	3	0	229
367	0	179	5	0	316
368	0	179	6	0	327
369	0	179	6	0	313
370	0	179	7	0	347
371	0	179	8	0	380
372	0	179	9	0	432
373	0	179	10	0	445
374	0	179	11	0	408
375	0	179	12	0	408
376	0	179	13	0	336
377	0	179	14	0	337
378	0	179	15	0	311
379	0	179	16	0	280
380	0	180	0	1	274
381	0	181	0	0	176
382	0	182	0	0	154
383	0	183	0	0	170
384	0	184	0	0	233
385	0	185	0	0	144
386	0	186	0	1	122
387	0	187	0	0	141
388	0	188	0	1	152
389	0	189	0	1	174
390	0	189	2	1	204
391	0	189	4	1	212
392	0	190	0	0	120
393	0	191	0	0	105
394	0	192	0	0	278
395	0	193	0	0	184
396	0	194	0	1	162
397	0	195	0	0	153
398	0	196	0	1	157
399	0	197	0	0	139
400	0	198	0	0	226
401	0	199	0	1	178
402	0	200	0	1	118
403	0	201	0	1	292
404	0	202	0	1	128
405	0	203	0	1	206
406	0	204	0	0	456
407	0	205	0	0	174
408	0	206	0	0	136
409	0	207	0	0	197
410	0	208	0	1	55
411	0	209	0	0	119
412	0	210	0	1	262
413	0	211	0	0	115
414	0	212	0	1	200
415	0	213	0	1	154
416	0	214	0	1	109
417	0	215	0	1	116
418	0	216	0	0	143
419	0	216	2	0	156
420	0	216	3	0	215
421	0	216	4	0	231
422	0	216	6	0	392
423	0	216	7	0	364
424	0	216	9	0	424
425	0	217	0	1	123
426	0	217	3	1	168
427	0	217	5	1	212
428	0	217	7	1	250
429	0	218	0	0	187
430	0	219	0	0	195
431	0	220	0	1	356
432	0	221	0	0	115
433	0	222	0	0	265
434	0	223	0	1	131
435	0	224	0	1	183
436	0	225	0	1	65
437	0	226	0	0	165
438	0	227	0	0	160
439	0	228	0	0	198
440	0	229	0	0	227
441	0	230	0	0	104
442	0	231	0	1	145
443	0	232	0	0	362
444	0	233	0	0	195
445	0	234	0	0	184
446	0	235	0	0	262
447	0	236	0	0	140
448	0	237	1	1	73
449	0	237	1	1	77
450	0	237	1	1	73
451	0	237	2	1	78
452	0	237	3	1	50
453	0	237	4	1	58
454	0	237	5	1	33
455	0	238	11	1	192
456	0	238	12	1	124
457	0	238	13	1	143
458	0	238	14	1	169
459	0	238	15	1	205
460	0	238	16	1	260
461	0	239	0	0	247
462	0	240	1	0	165
463	0	240	3	0	236
464	0	240	4	0	247
465	0	241	0	1	288
466	0	241	0	1	264
467	0	241	1	1	294
468	0	241	2	1	250
469	0	241	2	1	260
470	0	241	3	1	289
471	0	241	4	1	344
472	0	241	5	1	392
473	0	241	5	1	299
474	0	241	6	1	404
475	0	242	0	1	269
476	0	242	1	1	242
477	0	242	1	1	296
478	0	242	1	1	262
479	0	242	2	1	191
480	0	242	2	1	188
481	0	243	8	1	604
482	0	243	9	1	453
483	0	243	9	1	446
484	0	243	10	1	414
485	0	243	11	1	437
486	0	244	2	0	253
487	0	244	6	0	358
488	0	245	2	1	226
489	0	246	0	0	219
490	0	246	2	0	254
491	0	247	2	0	284
492	0	247	4	0	388
493	0	247	5	0	408
494	0	247	6	0	428
495	0	248	1	0	150
496	0	248	2	0	175
497	0	248	3	0	188
498	0	248	4	0	230
499	0	249	2	1	294
500	0	249	3	1	329
501	0	249	3	1	282
502	0	249	4	1	183
503	0	249	4	1	210
504	0	249	4	1	232
505	0	249	5	1	228
506	0	249	6	1	174
507	0	249	7	1	162
508	0	250	2	0	209
509	0	250	5	0	357
510	0	250	6	0	397
511	0	251	2	0	451
512	0	251	3	0	458
513	0	251	5	0	460
514	0	252	7	1	313
515	0	252	8	1	326
516	0	252	9	1	300
517	0	252	10	1	294
518	0	252	11	1	298
519	0	252	12	1	273
520	0	253	6	1	291
521	0	253	7	1	282
522	0	253	7	1	285
523	0	253	7	1	127
524	0	253	7	1	279
525	0	253	8	1	274
526	0	253	9	1	320
527	0	254	6	1	265
528	0	255	6	0	185
529	0	255	7	0	174
530	0	255	8	0	168
531	0	255	9	0	142
532	0	255	10	0	149
533	0	256	1	0	100
534	0	256	2	0	96
535	0	257	1	1	190
536	0	257	3	1	273
537	0	257	4	1	293
538	0	257	5	1	360
539	0	258	2	0	256
540	0	258	3	0	328
541	0	259	7	0	345
542	0	259	8	0	367
543	0	260	0	1	298
544	0	260	2	1	330
545	0	260	4	1	354
546	0	260	5	1	308
547	0	260	6	1	257
548	0	261	6	1	275
549	0	261	7	1	296
550	0	261	8	1	312
551	0	261	9	1	283
552	0	261	11	1	322
553	0	261	12	1	300
554	0	261	12	1	297
555	0	262	2	0	144
556	0	262	4	0	199
557	0	262	5	0	228
558	0	262	6	0	265
559	0	262	7	0	354
560	0	263	7	0	293
561	0	263	11	0	474
562	0	263	12	0	431
563	0	264	3	0	148
564	0	264	4	0	159
565	0	264	5	0	164
566	0	264	7	0	206
567	0	265	0	1	129
568	0	265	1	1	112
569	0	265	2	1	113
570	0	266	0	1	112
571	0	266	4	1	153
572	0	266	5	1	193
573	0	266	6	1	198
574	0	266	7	1	214
575	0	267	0	0	169
576	0	267	2	0	215
577	0	268	2	1	731
578	0	268	2	1	625
579	0	268	3	1	631
580	0	268	3	1	640
581	0	269	4	0	411
582	0	270	3	1	250
583	0	270	4	1	227
584	0	270	5	1	249
585	0	271	7	1	394
586	0	271	8	1	431
587	0	271	9	1	405
588	0	271	9	1	402
589	0	272	0	0	208
590	0	272	2	0	191
591	0	272	5	0	256
592	0	273	0	0	212
593	0	274	1	0	116
594	0	274	3	0	170
595	0	274	4	0	198
596	0	275	2	1	140
597	0	275	3	1	152
598	0	275	4	1	163
599	0	275	5	1	204
600	0	275	6	1	199
601	0	275	7	1	209
602	0	276	6	0	181
603	0	276	8	0	105
604	0	276	9	0	213
605	0	277	2	0	398
606	0	277	4	0	549
607	0	277	6	0	672
608	0	277	7	0	727
609	0	278	2	0	279
610	0	278	3	0	244
611	0	278	4	0	307
612	0	279	0	0	110
613	0	279	2	0	112
614	0	279	6	0	247
615	0	279	9	0	237
616	0	280	0	0	146
617	0	281	16	1	420
618	0	282	5	0	301
619	0	283	1	1	199
620	0	284	4	0	286
621	0	284	5	0	330
622	0	284	6	0	348
623	0	284	7	0	434
624	0	285	1	0	323
625	0	285	3	0	340
626	0	285	4	0	398
627	0	286	0	0	200
628	0	286	2	0	219
629	0	286	3	0	240
630	0	286	5	0	319
631	0	287	4	0	137
632	0	287	6	0	170
633	0	288	7	1	273
634	0	288	8	1	298
635	0	288	8	1	296
636	0	288	9	1	312
637	0	288	9	1	320
638	0	288	9	1	305
639	0	288	9	1	319
640	0	288	10	1	293
641	0	288	11	1	321
642	0	288	11	1	287
643	0	288	11	1	253
644	0	289	2	0	102
645	0	290	2	0	259
646	0	290	4	0	245
647	0	290	6	0	234
648	0	291	2	0	258
649	0	291	4	0	284
650	0	291	6	0	301
651	0	292	3	1	185
652	0	292	4	1	238
653	0	292	5	1	281
654	0	293	15	0	310
655	0	293	17	0	424
656	0	294	4	0	103
657	0	294	6	0	144
658	0	294	7	0	165
659	0	295	25	1	143
660	0	296	3	0	221
661	0	296	4	0	263
662	0	297	2	0	145
663	0	297	4	0	186
664	0	298	0	0	148
665	0	298	2	0	149
666	0	298	3	0	176
667	0	298	4	0	206
668	0	298	5	0	234
669	0	299	3	0	251
670	0	299	5	0	313
671	0	299	7	0	312
672	0	300	2	0	185
673	0	300	3	0	192
674	0	300	4	0	209
675	0	300	6	0	286
676	0	301	0	0	158
677	0	301	9	0	149
678	0	301	12	0	189
679	0	302	2	0	101
680	0	302	3	0	112
681	0	302	4	0	133
682	0	303	2	0	201
683	0	304	2	0	203
684	0	305	3	0	299
685	0	305	4	0	349
686	0	306	1	0	192
687	0	307	1	1	222
688	0	307	3	1	253
689	0	307	4	1	303
690	0	308	1	1	107
691	0	308	2	1	117
692	0	309	1	1	200
693	0	309	2	1	208
694	0	309	3	1	248
695	0	309	3	1	238
696	0	309	4	1	280
697	0	310	1	0	205
698	0	310	3	0	263
699	0	310	4	0	315
700	0	311	2	0	332
701	0	311	3	0	335
702	0	311	4	0	347
703	0	312	2	0	184
704	0	312	3	0	200
705	0	313	2	0	116
706	0	313	3	0	125
707	0	313	4	0	126
708	0	314	2	0	330
709	0	314	3	0	393
710	0	314	4	0	431
711	0	315	2	1	220
712	0	316	2	0	164
715	0	318	1	0	129
716	0	318	2	0	102
717	0	318	4	0	86
718	0	318	7	0	166
719	0	318	9	0	195
720	0	319	2	1	299
721	0	319	3	1	261
722	0	319	4	1	274
723	0	319	5	1	340
724	0	319	6	1	408
725	0	319	9	1	639
726	0	319	10	1	696
727	0	319	11	1	779
728	0	319	12	1	831
729	0	319	13	1	801
730	0	320	0	1	349
731	0	321	0	0	292
732	0	321	3	0	421
733	0	322	0	0	181
734	0	322	1	0	183
735	0	323	0	0	130
736	0	323	4	0	134
737	0	324	3	0	243
738	0	325	2	0	349
739	0	326	0	1	365
740	0	326	1	1	391
741	0	326	2	1	349
742	0	326	3	1	384
743	0	326	4	1	440
744	0	327	1	0	250
745	0	328	2	1	144
746	0	328	3	1	131
747	0	329	0	0	242
748	0	329	1	0	208
749	0	329	2	0	192
750	0	329	3	0	189
751	0	330	0	0	245
752	0	331	8	1	150
753	0	331	9	1	133
754	0	331	10	1	116
755	0	331	11	1	141
756	0	331	14	1	308
757	0	331	15	1	378
758	0	331	16	1	515
759	0	331	17	1	578
760	0	331	18	1	637
761	0	332	0	1	174
762	0	332	0	1	160
763	0	333	5	1	376
764	0	333	6	1	406
765	0	333	7	1	457
766	0	334	2	0	350
767	0	334	3	0	359
768	0	335	10	1	409
769	0	335	11	1	502
770	0	335	12	1	482
771	0	335	13	1	555
772	0	335	14	1	513
773	0	335	19	1	509
774	0	335	20	1	496
775	0	335	21	1	475
776	0	336	1	1	170
777	0	337	0	0	74
778	0	338	3	0	198
779	0	339	0	0	316
780	0	340	0	0	112
781	0	341	9	1	462
782	0	341	12	1	641
783	0	341	13	1	685
784	0	341	14	1	630
785	0	341	15	1	826
786	0	341	16	1	699
787	0	341	21	1	627
788	0	341	22	1	661
789	0	341	23	1	462
790	0	342	0	0	239
791	0	343	3	0	202
792	0	344	0	0	346
793	0	345	2	1	115
794	0	346	0	0	186
795	0	346	3	0	212
796	0	347	10	0	266
797	0	347	11	0	371
798	0	348	3	1	71
799	0	348	6	1	86
800	0	349	4	1	332
801	0	349	4	1	293
802	0	349	5	1	420
803	0	349	6	1	494
804	0	349	7	1	561
805	0	349	12	1	660
806	0	349	13	1	585
807	0	349	14	1	533
808	0	349	15	1	489
809	0	350	5	1	351
810	0	350	8	1	484
811	0	350	9	1	588
812	0	350	10	1	658
813	0	350	11	1	786
814	0	350	12	1	668
815	0	350	17	1	734
816	0	350	18	1	822
817	0	350	19	1	732
818	0	351	5	0	431
819	0	352	0	0	131
820	0	352	2	0	157
821	0	353	2	1	283
822	0	353	3	1	271
823	0	353	4	1	347
824	0	354	3	0	254
825	0	355	1	1	336
826	0	355	5	1	541
827	0	355	6	1	544
828	0	355	7	1	504
829	0	355	8	1	465
830	0	355	11	1	679
831	0	355	12	1	710
832	0	355	13	1	701
833	0	355	14	1	861
834	0	355	15	1	962
835	0	356	2	1	96
836	0	356	5	1	195
837	0	356	6	1	228
838	0	356	7	1	302
839	0	356	8	1	358
840	0	356	9	1	413
841	0	356	12	1	409
842	0	356	13	1	383
843	0	356	14	1	423
844	0	356	15	1	460
845	0	356	16	1	432
846	0	357	0	0	187
847	0	358	0	0	232
848	0	359	1	0	208
849	0	359	3	0	272
850	0	359	9	0	523
851	0	360	1	1	199
852	0	360	2	1	214
853	0	360	3	1	300
854	0	360	4	1	341
855	0	360	7	1	485
856	0	360	8	1	527
857	0	360	9	1	437
858	0	360	10	1	650
859	0	360	10	1	616
860	0	360	11	1	625
861	0	361	1	1	235
862	0	361	2	1	192
863	0	361	9	1	260
864	0	361	10	1	265
865	0	361	11	1	387
866	0	362	0	0	246
867	0	363	2	0	186
868	0	364	4	0	372
869	0	364	6	0	490
870	0	365	0	0	171
871	0	365	5	0	459
872	0	365	6	0	579
873	0	365	7	0	545
874	0	365	8	0	521
875	0	365	9	0	529
876	0	366	3	0	295
877	0	367	0	0	265
878	0	367	2	0	361
879	0	368	10	1	377
880	0	369	3	0	282
881	0	369	5	0	369
882	0	369	8	0	484
883	0	370	0	0	160
884	0	371	0	0	352
885	0	372	5	0	269
886	0	373	0	0	155
887	0	374	0	0	427
888	0	375	0	0	362
889	0	375	2	0	344
890	0	375	6	0	414
891	0	376	0	0	530
892	0	376	0	0	620
893	0	377	0	1	57
894	0	377	1	1	107
895	0	377	2	1	59
896	0	377	5	1	38
897	0	377	6	1	51
898	0	377	7	1	52
899	0	377	8	1	70
900	0	377	9	1	78
901	0	378	0	1	381
902	0	378	2	1	319
903	0	378	3	1	274
904	0	378	6	1	268
905	0	378	7	1	275
906	0	378	8	1	278
907	0	378	9	1	247
908	0	378	10	1	250
909	0	379	0	0	130
910	0	380	0	0	173
911	0	381	2	0	178
912	0	382	2	1	203
913	0	383	4	0	187
914	0	384	1	1	248
915	0	384	2	1	286
916	0	384	5	1	384
917	0	384	6	1	413
918	0	384	7	1	560
919	0	384	8	1	538
920	0	384	8	1	533
921	0	385	1	1	93
922	0	386	0	0	206
923	0	386	1	0	212
924	0	387	4	0	160
925	0	388	1	0	462
926	0	389	2	0	128
927	0	389	6	0	193
928	0	390	2	0	239
929	0	390	6	0	366
930	0	390	10	0	644
931	0	391	0	1	387
932	0	392	2	1	335
933	0	392	5	1	476
934	0	393	5	0	180
935	0	394	2	0	158
936	0	395	2	0	231
937	0	396	2	0	260
938	0	397	2	0	282
939	0	397	5	0	363
940	0	398	6	0	379
941	0	399	2	0	256
942	0	400	0	0	251
943	0	400	1	0	210
944	0	400	4	0	239
945	0	401	4	1	107
946	0	401	5	1	80
947	0	401	6	1	61
948	0	401	7	1	72
949	0	401	8	1	104
950	0	402	3	0	124
951	0	403	2	0	358
952	0	404	2	0	341
953	0	405	2	1	180
954	0	405	5	1	152
955	0	405	5	1	183
956	0	405	6	1	139
957	0	406	0	1	288
958	0	406	2	1	329
959	0	406	3	1	337
960	0	406	4	1	356
961	0	407	2	0	160
962	0	407	6	0	223
963	0	407	7	0	238
964	0	407	9	0	306
965	0	407	13	0	446
966	0	408	0	0	141
967	0	408	3	0	201
968	0	409	2	0	365
969	0	409	5	0	665
970	0	410	0	0	284
971	0	410	2	0	338
972	0	411	0	0	146
973	0	412	2	1	317
974	0	412	5	1	438
975	0	412	6	1	494
976	0	413	0	1	277
977	0	413	3	1	321
978	0	413	4	1	372
979	0	413	5	1	457
980	0	413	6	1	510
981	0	413	7	1	584
982	0	414	1	0	291
983	0	415	1	0	167
984	0	416	0	0	216
985	0	416	1	0	197
986	0	417	0	0	593
987	0	417	1	0	546
988	0	417	2	0	586
989	0	417	4	0	530
990	0	417	7	0	537
991	0	417	9	0	529
992	0	418	13	0	315
993	0	418	14	0	262
994	0	418	17	0	302
995	0	418	18	0	349
996	0	418	19	0	468
997	0	418	21	0	523
998	0	418	24	0	703
999	0	418	26	0	806
1000	0	419	0	0	332
1001	0	419	2	0	382
1002	0	419	3	0	461
1003	0	420	0	1	166
1004	0	420	1	1	158
1005	0	421	0	1	137
1006	0	421	0	1	127
1007	0	422	0	1	178
1008	0	422	1	1	174
1009	0	422	2	1	216
1010	0	423	0	1	172
1011	0	423	2	1	183
1012	0	423	4	1	261
1013	0	424	0	0	267
1014	0	424	1	0	278
1015	0	424	5	0	537
1016	0	424	7	0	604
1017	0	425	12	1	142
1018	0	426	0	1	118
1019	0	427	0	1	225
1020	0	427	1	1	244
1021	0	428	0	0	141
1022	0	428	3	0	156
1023	0	428	4	0	202
1024	0	428	6	0	296
1025	0	429	0	1	217
1026	0	429	1	1	223
1027	0	429	2	1	192
1028	0	429	5	1	204
1029	0	429	8	1	338
1030	0	429	11	1	444
1031	0	430	1	1	180
1032	0	431	0	0	104
1033	0	432	0	0	282
1034	0	432	1	0	205
1035	0	432	3	0	255
1036	0	433	0	0	344
1037	0	433	1	0	343
1038	0	433	2	0	396
1039	0	434	0	0	338
1040	0	434	1	0	342
1041	0	434	3	0	386
1042	0	434	5	0	497
1043	0	434	7	0	602
1044	0	435	8	0	268
1045	0	435	11	0	236
1046	0	436	0	1	221
1047	0	437	0	1	239
1048	0	437	2	1	245
1049	0	438	0	0	186
1050	0	438	2	0	200
1051	0	438	4	0	253
1052	0	439	0	1	239
1053	0	439	2	1	325
1054	0	440	2	0	188
1055	0	441	0	0	335
1056	0	441	1	0	260
1057	0	441	3	0	304
1058	0	442	0	1	180
1059	0	442	1	1	170
1060	0	442	2	1	177
1061	0	442	3	1	185
1062	0	442	6	1	350
1063	0	443	0	1	153
1064	0	443	2	1	134
1065	0	443	4	1	165
1066	0	443	5	1	216
1067	0	444	0	1	355
1068	0	444	1	1	333
1069	0	445	0	0	115
1070	0	445	1	0	114
1071	0	445	6	0	236
1072	0	445	8	0	268
1073	0	445	10	0	232
1074	0	445	13	0	182
1075	0	446	2	1	186
1076	0	446	6	1	219
1077	0	446	8	1	297
1078	0	446	11	1	362
1079	0	446	18	1	331
1080	0	446	20	1	383
1081	0	447	1	0	231
1082	0	447	3	0	315
1083	0	447	6	0	478
1084	0	447	8	0	507
1085	0	447	10	0	477
1086	0	447	13	0	505
1087	0	448	0	0	157
1088	0	448	2	0	207
1089	0	449	0	0	201
1090	0	449	1	0	265
1091	0	449	4	0	448
1092	0	449	6	0	565
1093	0	449	8	0	750
1094	0	450	0	0	268
1095	0	450	2	0	245
1096	0	450	3	0	403
1097	0	450	5	0	399
1098	0	451	0	0	334
1099	0	452	0	1	249
1100	0	453	0	1	172
1101	0	453	4	1	250
1102	0	453	6	1	227
1103	0	453	8	1	223
1104	0	454	7	0	515
1105	0	454	10	0	541
1106	0	455	0	1	228
1107	0	455	2	1	229
1108	0	455	4	1	309
1109	0	456	0	0	183
1110	0	456	4	0	261
1111	0	457	1	0	130
1112	0	457	3	0	163
1113	0	457	5	0	167
1114	0	457	8	0	223
1115	0	457	10	0	285
1116	0	457	12	0	292
1117	0	458	0	0	247
1118	0	458	1	0	246
1119	0	459	0	1	243
1120	0	460	0	1	113
1121	0	460	2	1	110
1122	0	461	0	0	236
1123	0	461	3	0	308
1124	0	462	1	0	230
1125	0	463	0	1	317
1126	0	464	0	0	430
1127	0	464	1	0	472
1128	0	464	3	0	488
1129	0	465	0	0	507
1130	0	465	3	0	421
1131	0	466	0	0	112
1132	0	467	0	0	218
1133	0	468	0	1	278
1134	0	468	1	1	296
1135	0	469	0	0	130
1136	0	469	1	0	111
1137	0	470	0	0	227
1138	0	471	0	0	105
1139	0	471	1	0	120
1140	0	471	4	0	212
1141	0	472	0	1	236
1143	0	472	11	1	257
1144	0	472	13	1	364
1145	0	473	0	1	374
1146	0	473	1	1	301
1147	0	473	3	1	270
1148	0	474	3	0	402
1149	0	474	5	0	441
1150	0	475	0	1	131
1151	0	476	0	0	187
1152	0	476	1	0	187
1153	0	477	0	1	211
1154	0	477	4	1	368
1155	0	477	6	1	392
1156	0	477	8	1	373
1157	0	477	10	1	360
1158	0	478	0	0	157
1159	0	478	1	0	161
1160	0	478	4	0	237
1161	0	479	0	0	198
1162	0	479	2	0	251
1163	0	479	4	0	407
1164	0	479	7	0	620
1165	0	480	0	0	220
1166	0	480	1	0	189
1167	0	480	4	0	212
1168	0	480	6	0	273
1169	0	481	0	0	222
1170	0	482	0	0	140
1171	0	483	2	1	568
1172	0	484	0	0	179
1173	0	484	1	0	156
1174	0	485	0	0	192
1175	0	485	2	0	252
1176	0	485	5	0	254
1177	0	485	7	0	302
1178	0	485	9	0	286
1179	0	486	0	0	173
1180	0	486	3	0	236
1181	0	487	0	1	204
1182	0	487	1	1	135
1183	0	487	3	1	166
1184	0	487	5	1	156
1185	0	488	0	1	146
1186	0	488	2	1	105
1187	0	488	4	1	109
1188	0	488	7	1	153
1189	0	489	0	0	286
1190	0	489	4	0	409
1191	0	490	4	0	336
1192	0	490	7	0	544
1193	0	491	1	1	258
1194	0	491	2	1	262
1195	0	491	3	1	302
1196	0	491	6	1	428
1197	0	491	8	1	457
1198	0	491	10	1	428
1199	0	492	0	0	168
1200	0	492	1	0	235
1201	0	493	0	0	180
1202	0	493	1	0	222
1203	0	494	0	0	310
1204	0	494	2	0	396
1205	0	494	3	0	410
1206	0	495	0	1	201
1207	0	495	2	1	252
1208	0	495	4	1	335
1209	0	495	6	1	375
1210	0	495	6	1	395
1211	0	495	7	1	414
1212	0	496	0	1	196
1213	0	496	1	1	190
1214	0	497	9	1	591
1215	0	497	12	1	645
1216	0	498	0	0	331
1217	0	498	1	0	341
1218	0	498	3	0	415
1219	0	498	5	0	479
1220	0	499	0	0	237
1221	0	500	0	1	104
1222	0	500	1	1	114
1223	0	500	2	1	121
1224	0	500	4	1	171
1225	0	500	7	1	204
1226	0	500	9	1	236
1227	0	501	0	0	162
1228	0	501	4	0	236
1229	0	501	6	0	309
1230	0	501	8	0	345
1231	0	501	11	0	409
1232	0	502	0	0	226
1233	0	503	0	1	240
1234	0	503	1	1	220
1235	0	504	0	0	219
1236	0	504	13	0	523
1237	0	504	15	0	491
1238	0	504	18	0	482
1239	0	505	0	0	234
1240	0	506	0	1	144
1241	0	506	2	1	183
1242	0	507	0	0	329
1243	0	507	7	0	488
1244	0	508	0	0	234
1245	0	509	0	0	228
1246	0	510	0	0	317
1247	0	510	2	0	360
1248	0	510	4	0	315
1249	0	510	7	0	391
1250	0	511	0	1	146
1251	0	511	1	1	143
1252	0	512	0	0	286
1253	0	512	1	0	288
1254	0	512	3	0	381
1255	0	512	5	0	574
1256	0	512	8	0	760
1257	0	512	12	0	607
1258	0	513	0	1	208
1259	0	513	1	1	200
1260	0	513	3	1	178
1261	0	514	0	1	247
1262	0	514	1	1	272
1263	0	514	3	1	196
1264	0	514	7	1	350
1265	0	514	10	1	514
1266	0	514	11	1	526
1267	0	514	14	1	514
1268	0	514	16	1	600
1269	0	515	1	0	355
1270	0	515	4	0	526
1271	0	516	0	0	170
1272	0	516	1	0	127
1273	0	516	2	0	175
1274	0	516	4	0	235
1275	0	516	7	0	353
1276	0	517	0	0	150
1277	0	517	1	0	159
1278	0	517	3	0	204
1279	0	517	5	0	253
1280	0	517	9	0	360
1281	0	517	10	0	444
1282	0	518	0	1	247
1283	0	519	0	0	239
1284	0	519	4	0	428
1285	0	519	6	0	404
1286	0	519	8	0	439
1287	0	520	0	0	192
1288	0	520	3	0	271
1289	0	520	5	0	343
1290	0	520	8	0	434
1291	0	521	0	0	153
1292	0	522	0	0	303
1293	0	522	3	0	212
1294	0	523	0	0	211
1295	0	523	1	0	193
1296	0	524	0	1	150
1297	0	525	0	1	171
1298	0	525	1	1	206
1299	0	525	3	1	333
1300	0	526	0	0	130
1301	0	526	1	0	128
1302	0	527	0	0	153
1303	0	527	3	0	191
1304	0	527	4	0	227
1305	0	527	6	0	314
1306	0	527	8	0	409
1307	0	527	11	0	581
1308	0	528	0	1	202
1309	0	528	2	1	154
1310	0	529	0	0	79
1311	0	529	3	0	109
1312	0	529	6	0	244
1313	0	529	8	0	349
1314	0	529	13	0	398
1315	0	530	0	1	265
1316	0	530	2	1	228
1317	0	530	8	1	261
1318	0	531	0	0	215
1319	0	532	0	0	319
1320	0	533	0	0	184
1321	0	533	1	0	168
1322	0	533	4	0	311
1323	0	533	6	0	375
1324	0	534	0	1	113
1325	0	534	2	1	95
1326	0	534	4	1	96
1327	0	534	5	1	99
1328	0	534	7	1	150
1329	0	535	0	1	226
1330	0	536	0	0	277
1331	0	536	2	0	339
1332	0	537	0	0	194
1333	0	537	2	0	208
1334	0	537	4	0	260
1335	0	537	7	0	455
1336	0	538	0	0	212
1337	0	539	0	0	238
1338	0	539	1	0	226
1339	0	539	3	0	254
1340	0	539	5	0	328
1341	0	540	0	0	273
1342	0	540	2	0	335
1343	0	540	4	0	412
1344	0	540	5	0	468
1345	0	541	0	1	102
1346	0	541	1	1	95
1347	0	542	0	0	175
1348	0	542	4	0	276
1349	0	543	0	0	122
1350	0	544	0	0	230
1351	0	544	1	0	204
1352	0	544	3	0	233
1353	0	544	4	0	260
1354	0	544	6	0	384
1355	0	545	0	0	195
1356	0	545	2	0	263
1357	0	546	0	0	316
1358	0	547	0	1	330
1359	0	547	7	1	401
1360	0	547	7	1	444
1361	0	547	8	1	464
1362	0	547	9	1	475
1363	0	547	10	1	522
1364	0	547	11	1	495
1365	0	547	12	1	520
1366	0	547	13	1	554
1367	0	547	14	1	580
1368	0	547	15	1	566
1369	0	547	16	1	564
1370	0	548	0	1	410
1371	0	548	2	0	594
1372	0	549	0	0	150
1373	0	549	5	0	116
1374	0	549	9	0	89
1375	0	549	13	0	130
1376	0	549	15	0	140
1377	0	549	16	0	157
1378	0	549	19	0	259
1379	0	550	0	0	313
1380	0	551	0	0	149
1381	0	551	2	0	176
1382	0	551	6	0	294
1383	0	551	9	0	270
1384	0	552	0	0	179
1385	0	552	5	0	147
1386	0	552	7	0	186
1387	0	552	8	0	202
1388	0	553	0	0	125
1389	0	553	2	0	144
1390	0	554	0	1	120
1391	0	554	4	1	270
1392	0	554	5	1	246
1393	0	554	6	1	325
1394	0	554	7	1	297
1395	0	554	8	1	322
1396	0	554	9	1	337
1397	0	554	10	1	390
1398	0	554	11	1	433
1399	0	555	0	1	247
1400	0	555	3	1	345
1401	0	555	4	1	423
1402	0	555	5	1	418
1403	0	555	6	1	383
1404	0	555	7	1	488
1405	0	555	8	1	598
1406	0	555	9	1	622
1407	0	555	10	1	679
1408	0	555	11	1	697
1409	0	555	12	1	765
1410	0	556	0	1	183
1411	0	556	4	1	274
1412	0	556	5	1	281
1413	0	556	6	1	316
1414	0	556	7	1	380
1415	0	556	8	1	361
1416	0	556	9	1	447
1417	0	556	10	1	477
1418	0	556	11	1	371
1419	0	556	12	1	352
1420	0	556	13	1	457
1421	0	557	0	1	95
1422	0	557	2	1	109
1423	0	558	0	1	228
1424	0	558	0	1	231
1425	0	558	1	1	224
1426	0	558	2	1	253
1427	0	558	3	1	311
1428	0	558	4	1	381
1429	0	558	4	1	426
1430	0	558	5	1	420
1431	0	558	6	1	469
1432	0	558	7	1	497
1433	0	558	8	1	571
1434	0	559	0	1	159
1435	0	559	0	1	149
1436	0	559	2	1	195
1437	0	559	2	1	234
1438	0	559	3	1	256
1439	0	559	4	1	240
1440	0	559	5	1	239
1441	0	559	6	1	294
1442	0	559	7	1	279
1443	0	559	8	1	239
1444	0	559	9	1	252
1445	0	560	0	1	401
1446	0	560	1	1	364
1447	0	560	2	1	287
1448	0	560	3	1	256
1449	0	560	4	1	313
1450	0	560	5	1	286
1451	0	560	6	1	267
1452	0	560	7	1	210
1453	0	560	8	1	210
1454	0	560	9	1	225
1455	0	560	10	1	214
1456	0	561	0	0	96
1457	0	561	1	0	90
1458	0	561	2	0	106
1459	0	561	7	0	269
1460	0	562	0	0	181
1461	0	562	3	0	184
1462	0	563	0	0	193
1463	0	563	1	0	177
1464	0	563	2	0	189
1465	0	564	0	0	106
1466	0	564	5	0	174
1467	0	564	7	0	200
1468	0	565	0	0	154
1469	0	565	2	0	170
1470	0	565	4	0	274
1471	0	565	7	0	452
1472	0	566	0	1	179
1473	0	566	2	1	270
1474	0	566	4	1	354
1475	0	566	5	1	357
1476	0	566	5	1	199
1477	0	566	5	1	178
1478	0	566	6	1	161
1479	0	566	7	1	128
1480	0	566	10	1	143
1481	0	566	11	1	176
1482	0	567	0	1	263
1483	0	567	4	1	193
1484	0	567	5	1	194
1485	0	567	6	1	266
1486	0	567	7	1	287
1487	0	567	8	1	383
1488	0	567	9	1	424
1489	0	567	10	1	518
1490	0	567	11	1	520
1491	0	567	12	1	568
1492	0	567	13	1	593
1493	0	568	0	0	79
1494	0	568	1	0	79
1495	0	569	0	0	144
1496	0	569	1	0	139
1497	0	569	1	0	88
1498	0	570	0	0	194
1499	0	570	1	0	207
1500	0	570	3	0	231
1501	0	571	0	0	143
1502	0	571	1	0	131
1503	0	571	2	0	143
1504	0	571	3	0	159
1505	0	572	0	1	252
1506	0	572	1	1	240
1507	0	573	4	1	211
1508	0	574	2	0	162
1509	0	574	4	0	201
1510	0	574	6	0	214
1511	0	574	11	0	333
1512	0	574	13	0	292
1513	0	574	15	0	337
1514	0	574	17	0	374
1515	0	575	4	0	346
1516	0	576	13	0	411
1517	0	577	5	1	295
1518	0	577	7	1	297
1519	0	577	10	1	390
1520	0	578	4	0	366
1521	0	579	5	0	160
1522	0	579	9	0	203
1523	0	579	11	0	245
1524	0	579	13	0	259
1525	0	579	16	0	293
1526	0	580	0	1	157
1527	0	580	5	1	222
1528	0	581	2	1	173
1529	0	581	4	1	193
1530	0	581	7	1	192
1531	0	581	9	1	200
1532	0	581	11	1	206
1533	0	581	14	1	266
1534	0	582	1	1	264
1535	0	582	3	1	193
1536	0	582	4	1	155
1537	0	582	6	1	153
1538	0	582	8	1	149
1539	0	583	1	1	156
1540	0	583	2	1	165
1541	0	583	3	1	182
1542	0	583	5	1	262
1543	0	583	8	1	332
1544	0	583	10	1	407
1545	0	583	10	1	375
1546	0	583	12	1	387
1547	0	583	15	1	466
1548	0	584	1	0	145
1549	0	584	6	0	236
1550	0	584	9	0	299
1551	0	584	13	0	323
1552	0	585	1	0	130
1553	0	585	3	0	176
1554	0	585	5	0	230
1555	0	586	0	0	185
1556	0	586	2	0	201
1557	0	587	0	1	97
1558	0	587	2	1	96
1559	0	587	4	1	134
1560	0	587	5	1	140
1561	0	587	7	1	150
1562	0	587	9	1	131
1563	0	587	12	1	109
1564	0	588	1	0	271
1565	0	588	3	0	379
1566	0	589	1	0	214
1567	0	589	3	0	279
1568	0	590	1	0	212
1569	0	590	2	0	215
1570	0	590	5	0	224
1571	0	590	7	0	197
1572	0	591	0	0	158
1573	0	591	1	0	164
1574	0	591	2	0	201
1575	0	591	4	0	275
1576	0	592	0	0	117
1577	0	592	5	0	183
1578	0	592	7	0	220
1579	0	592	9	0	308
1580	0	592	11	0	368
1581	0	593	0	0	229
1582	0	593	3	0	190
1583	0	594	1	1	93
1584	0	594	2	1	97
1585	0	594	5	1	155
1586	0	594	5	1	168
1587	0	594	7	1	189
1588	0	594	9	1	134
1589	0	594	12	1	31
1590	0	595	0	0	150
1591	0	595	2	0	193
1592	0	596	0	0	157
1593	0	596	8	0	225
1594	0	596	9	0	208
1595	0	597	0	1	211
1596	0	597	2	1	248
1597	0	598	0	0	224
1598	0	598	2	0	266
1599	0	599	0	0	384
1600	0	599	1	0	375
1601	0	599	2	0	448
1602	0	599	4	0	537
1603	0	599	6	0	669
1604	0	599	8	0	725
1605	0	599	9	0	683
1606	0	599	11	0	656
1607	0	600	0	0	212
1608	0	600	1	0	214
1609	0	600	3	0	217
1610	0	601	0	0	145
1611	0	601	2	0	174
1612	0	601	4	0	246
1613	0	602	1	0	254
1614	0	602	3	0	275
1615	0	602	4	0	331
1616	0	602	6	0	247
1617	0	602	8	0	200
1618	0	602	10	0	189
1619	0	603	2	1	106
1620	0	603	4	1	172
1621	0	603	6	1	247
1622	0	603	7	1	285
1623	0	603	8	1	288
1624	0	603	9	1	291
1625	0	603	10	1	343
1626	0	603	11	1	348
1627	0	604	0	1	236
1628	0	604	3	1	299
1629	0	604	5	1	295
1630	0	604	7	1	326
1631	0	605	1	1	180
1632	0	605	4	1	141
1633	0	605	7	1	212
1634	0	605	9	1	430
1635	0	606	1	0	209
1636	0	606	2	0	187
1637	0	607	0	0	201
1638	0	607	1	0	180
1639	0	607	2	0	181
1640	0	607	4	0	225
1641	0	607	6	0	275
1642	0	607	8	0	330
1643	0	608	0	1	165
1644	0	608	2	1	195
1645	0	608	4	1	251
1646	0	609	0	1	246
1647	0	609	1	1	207
1648	0	609	3	1	120
1649	0	609	5	1	78
1650	0	609	5	1	97
1651	0	610	0	1	185
1652	0	610	2	1	197
1653	0	610	4	1	303
1654	0	610	5	1	385
1655	0	610	7	1	298
1656	0	610	10	1	203
1657	0	611	0	0	168
1658	0	611	2	0	119
1659	0	612	0	0	189
1660	0	612	2	0	191
1661	0	612	4	0	286
1662	0	613	0	1	179
1663	0	613	1	1	186
1664	0	613	6	1	277
1665	0	613	9	1	210
1666	0	614	0	0	271
1667	0	614	8	0	784
1668	0	614	10	0	683
1669	0	614	12	0	643
1670	0	614	14	0	550
1671	0	614	16	0	514
1672	0	614	18	0	519
1673	0	615	1	0	161
1674	0	615	2	0	188
1675	0	615	4	0	270
1676	0	616	1	1	149
1677	0	616	3	1	153
1678	0	616	4	1	177
1679	0	616	6	1	198
1680	0	617	0	1	165
1681	0	617	1	1	147
1682	0	617	3	1	162
1683	0	617	5	1	226
1684	0	618	2	0	325
1685	0	618	4	0	355
1686	0	618	6	0	421
1687	0	618	8	0	434
1688	0	619	2	0	286
1689	0	619	4	0	410
1690	0	620	3	1	324
1691	0	620	3	1	328
1692	0	620	5	1	271
1693	0	620	8	1	253
1694	0	621	2	1	203
1695	0	622	0	0	340
1696	0	622	5	0	508
1697	0	623	0	0	181
1698	0	623	2	0	127
1699	0	623	4	0	133
1700	0	623	6	0	172
1701	0	624	0	1	306
1702	0	624	1	1	243
1703	0	624	3	1	271
1704	0	625	0	1	91
1705	0	625	2	1	75
1706	0	625	3	1	68
1707	0	625	4	1	85
1708	0	625	7	1	121
1710	0	627	0	0	24
1711	0	627	1	0	32
1712	0	627	3	0	48
1713	0	627	5	0	52
1714	0	628	0	0	189
1715	0	628	1	0	218
1716	0	628	3	0	305
1717	0	629	0	0	122
1718	0	629	1	0	130
1719	0	629	5	0	283
1720	0	630	0	0	332
1721	0	630	1	0	378
1722	0	630	3	0	469
1723	0	631	0	0	174
1724	0	631	2	0	241
1725	0	631	4	0	321
1726	0	631	6	0	443
1727	0	632	0	0	96
1728	0	632	2	0	157
1729	0	632	4	0	247
1730	0	632	6	0	306
1731	0	633	0	0	205
1732	0	633	3	0	247
1733	0	633	5	0	335
1734	0	633	7	0	440
1735	0	634	0	1	145
1736	0	634	2	1	182
1737	0	634	5	1	219
1738	0	634	8	1	301
1739	0	635	0	0	157
1740	0	635	5	0	235
1741	0	635	6	0	280
1742	0	636	0	0	79
1743	0	636	1	0	100
1744	0	636	3	0	172
1745	0	636	5	0	239
1746	0	637	0	0	285
1747	0	637	2	0	362
1748	0	637	4	0	485
1749	0	638	0	0	267
1750	0	638	2	0	319
1751	0	639	0	0	136
1752	0	639	1	0	156
1753	0	639	3	0	168
1754	0	640	0	1	155
1755	0	640	2	1	243
1756	0	640	6	1	397
1757	0	640	8	1	563
1758	0	641	0	1	370
1759	0	641	1	1	470
1760	0	642	0	0	170
1761	0	642	5	0	149
1762	0	642	7	0	182
1763	0	643	0	0	315
1764	0	643	1	0	297
1765	0	643	3	0	298
1766	0	643	5	0	334
1767	0	643	7	0	250
1768	0	644	0	0	338
1769	0	644	1	0	280
1770	0	645	0	0	147
1771	0	645	9	0	142
1772	0	645	13	0	199
1773	0	646	0	1	250
1774	0	646	2	1	268
1775	0	646	6	1	260
1776	0	647	0	1	88
1777	0	647	2	1	100
1778	0	648	0	0	119
1779	0	649	0	0	158
1780	0	649	1	0	158
1781	0	649	3	0	240
1782	0	649	6	0	301
1783	0	650	2	1	97
1784	0	651	10	0	206
1785	0	651	13	0	150
1786	0	651	16	0	192
1787	0	652	0	0	113
1788	0	652	2	0	185
1789	0	652	3	0	197
1790	0	652	5	0	274
1791	0	653	0	1	145
1792	0	653	2	1	172
1793	0	653	5	1	290
1794	0	654	0	0	185
1795	0	654	2	0	202
1796	0	655	0	0	206
1797	0	655	2	0	204
1798	0	656	0	0	223
1799	0	656	2	0	227
1800	0	656	3	0	276
1801	0	657	0	0	133
1802	0	657	2	0	162
1803	0	658	0	0	196
1804	0	658	1	0	187
1805	0	658	3	0	302
1806	0	658	5	0	385
1807	0	659	0	1	176
1808	0	659	4	1	156
1809	0	660	0	0	262
1810	0	660	2	0	339
1811	0	661	0	0	266
1812	0	661	2	0	295
1813	0	662	0	0	189
1814	0	662	1	0	184
1815	0	662	3	0	268
1816	0	663	0	1	276
1817	0	663	2	1	340
1818	0	663	4	1	341
1819	0	664	0	0	205
1820	0	664	2	0	196
1821	0	665	0	0	151
1822	0	665	1	0	127
1823	0	665	2	0	178
1824	0	665	4	0	246
1825	0	665	5	0	402
1826	0	666	0	1	257
1827	0	666	2	1	354
1828	0	666	4	1	233
1829	0	666	6	1	166
1830	0	667	0	0	368
1831	0	668	5	1	394
1832	0	669	4	0	265
1833	0	670	0	0	313
1834	0	670	3	0	388
1835	0	671	0	0	252
1836	0	672	0	1	176
1837	0	672	1	1	168
1838	0	672	3	1	212
1839	0	673	0	0	142
1840	0	673	3	0	176
1841	0	674	0	1	215
1842	0	674	3	1	268
1843	0	675	0	0	206
1844	0	676	0	1	63
1845	0	676	1	1	62
1846	0	676	3	1	60
1847	0	677	0	1	161
1848	0	677	2	1	180
1849	0	677	4	1	175
1850	0	678	0	1	265
1851	0	678	1	1	275
1852	0	678	3	1	336
1853	0	679	0	0	193
1854	0	679	2	0	204
1855	0	680	0	0	227
1856	0	680	2	0	306
1857	0	681	0	0	168
1858	0	681	2	0	225
1859	0	682	0	0	312
1860	0	682	1	0	327
1861	0	682	3	0	467
1862	0	683	0	0	215
1863	0	683	5	0	340
1864	0	683	6	0	346
1865	0	683	7	0	381
1866	0	684	0	0	228
1867	0	684	3	0	198
1868	0	685	0	1	268
1869	0	685	1	1	275
1870	0	685	3	1	356
1871	0	686	0	1	245
1872	0	686	1	1	187
1873	0	686	2	1	191
1874	0	686	4	1	186
1875	0	687	0	1	634
1876	0	687	3	1	541
1877	0	688	0	0	111
1878	0	688	1	0	111
1879	0	689	1	0	149
1880	0	689	3	0	135
1881	0	690	0	1	217
1882	0	690	2	1	200
1883	0	691	1	0	217
1884	0	691	2	0	238
1885	0	692	0	0	217
1886	0	692	2	0	243
1887	0	693	0	1	236
1888	0	693	3	1	322
1889	0	694	0	0	268
1890	0	694	1	0	256
1891	0	694	3	0	314
1892	0	695	3	1	163
1893	0	695	4	1	165
1894	0	695	5	1	199
1895	0	695	6	1	231
1896	0	695	7	1	195
1897	0	696	3	1	418
1898	0	696	3	1	494
1899	0	696	3	1	420
1900	0	696	3	1	505
1901	0	696	20	1	542
1902	0	696	21	1	521
1903	0	696	22	1	552
1904	0	696	23	1	484
1905	0	696	24	1	506
1906	0	697	2	0	203
1907	0	697	3	0	138
1908	0	698	20	1	128
1909	0	698	21	1	94
1910	0	698	22	1	112
1911	0	698	23	1	110
1912	0	698	24	1	111
1913	0	698	25	1	103
1914	0	698	26	1	107
1916	0	700	0	0	105
1928	0	703	2	1	364
1929	0	703	3	1	381
1930	0	703	4	1	469
1931	0	703	5	1	421
1932	0	703	6	1	501
1933	0	703	7	1	452
1934	0	703	8	1	425
1935	0	704	2	1	186
1936	0	704	3	1	244
1937	0	704	4	1	266
1938	0	704	5	1	202
1939	0	704	6	1	188
1940	0	704	7	1	175
1941	0	704	8	1	169
1942	0	705	1	1	646
1943	0	705	3	1	652
1944	0	705	4	1	700
1945	0	705	5	1	752
1946	0	705	6	1	841
1947	0	706	5	0	200
1948	0	707	3	0	113
1949	0	707	5	0	137
1950	0	708	0	0	258
1951	0	709	0	1	315
1952	0	709	1	1	325
1953	0	709	2	1	303
1954	0	709	3	1	322
1955	0	709	4	1	346
1956	0	710	1	1	283
1957	0	710	1	1	285
1958	0	710	2	1	260
1959	0	710	4	1	233
1960	0	711	3	1	186
1961	0	711	3	1	133
1962	0	711	4	1	175
1963	0	712	0	1	355
1964	0	712	1	1	347
1965	0	712	2	1	433
1966	0	712	3	1	429
1967	0	712	4	1	323
1968	0	713	0	0	334
1969	0	714	3	0	148
1970	0	715	1	0	331
1971	0	716	3	0	94
1972	0	717	0	1	257
1973	0	717	0	1	236
1974	0	717	1	1	240
1975	0	717	2	1	253
1976	0	718	0	1	254
1977	0	718	1	1	299
1978	0	718	2	1	278
1979	0	719	0	0	185
1980	0	720	0	0	160
1981	0	721	0	1	433
1982	0	721	1	1	439
1983	0	722	0	0	230
1984	0	723	0	1	165
1985	0	723	1	1	197
1986	0	724	1	1	225
1987	0	724	1	1	231
1988	0	725	0	1	278
1989	0	726	0	1	190
1991	0	728	0	0	322
1992	0	729	0	1	235
1993	0	729	0	1	238
1994	0	730	0	1	249
1995	0	730	1	1	241
1996	0	730	2	1	278
1997	0	730	3	1	294
1998	0	730	4	1	299
1999	0	731	1	0	182
2000	0	732	0	0	227
2001	0	733	0	1	295
2002	0	734	0	0	141
2003	0	735	4	1	350
2004	0	735	4	1	369
2005	0	735	5	1	226
2006	0	735	6	1	219
2007	0	735	7	1	256
2008	0	735	8	1	239
2009	0	735	9	1	284
2010	0	736	0	0	227
2011	0	737	0	1	398
2012	0	737	1	1	359
2013	0	737	2	1	362
2014	0	738	0	0	213
2015	0	739	2	1	94
2016	0	739	4	1	75
2017	0	740	1	0	228
2018	0	740	2	0	225
[truncated: 589 more rows]
