# Supplementary material for: A novel haemocytometric COVID-19 prognostic score developed and validated in an observational multicentre European hospital-based study
Source: eLife journal article supplement (doi:10.7554/elife.63195), 2020-11-26
Supplement: supp [file elife-63195-supp-v1.zip › elife_poa_e63195_Figure_7_source_data_2.csv]

Figure 7 – source data file 2. Source data for trends of platelet-to-lymphocyte count ratio over 14 days of hospitalisation in critical/fatal (CF) and non-critical (NC) patients
Filename	exclusion	Pat_ID	length_of_hospitalisation	Critical_or_Fatal	PLT/LYMPH ratio
1	0	1	0	1	56,14754098
2	0	1	2	1	81,37931034
3	0	1	2	1	95,68965517
4	0	1	3	1	120
5	0	1	4	1	141,3793103
6	0	1	15	1	229,0540541
7	0	2	0	0	238,1443299
8	0	2	1	0	243,9716312
9	0	2	2	0	330,46875
10	0	2	3	0	275,4285714
11	0	2	4	0	260,6635071
12	0	2	6	0	307,1090047
13	0	3	0	1	198,6486486
14	0	3	1	1	147,6190476
15	0	3	1	1	389,1891892
16	0	3	2	1	256
17	0	3	3	1	205,7692308
18	0	3	4	1	331,3432836
19	0	3	4	1	348,3870968
20	0	3	5	1	315,2777778
21	0	3	6	1	228,5714286
22	0	3	7	1	215,0537634
23	0	3	8	1	227,9279279
24	0	3	9	1	233,7579618
25	0	3	10	1	314,5833333
26	0	3	11	1	348,2269504
27	0	3	12	1	519,8019802
28	0	3	13	1	528,2258065
29	0	4	0	1	225,3521127
30	0	4	1	1	790,4761905
31	0	4	1	1	480,5555556
32	0	4	2	1	362,5
33	0	4	3	1	1166,666667
34	0	4	4	1	1075
35	0	4	5	1	1560
36	0	4	6	1	300
37	0	4	7	1	319,5121951
38	0	4	8	1	234,1463415
39	0	4	9	1	162,5
40	0	4	10	1	112,371134
41	0	4	10	1	105,7142857
42	0	4	11	1	83,33333333
43	0	4	12	1	32,40740741
44	0	4	13	1	62,22222222
45	0	4	14	1	87,58169935
46	0	5	0	0	331,0344828
47	0	5	1	0	346
48	0	6	0	0	394,3661972
49	0	6	2	0	505,1724138
50	0	6	3	0	460
51	0	6	5	0	602,5641026
52	0	7	0	0	142,3076923
53	0	7	2	0	108,994709
54	0	7	3	0	136,9565217
55	0	7	4	0	165,3179191
56	0	7	5	0	183,625731
57	0	7	6	0	190,4761905
58	0	8	1	0	100
59	0	9	0	0	450
60	0	9	2	0
61	0	9	3	0	446,5517241
62	0	9	4	0	475
63	0	9	5	0	441,2698413
64	0	9	7	0	384,6153846
65	0	10	0	1	458,3333333
66	0	10	1	1	457,5757576
67	0	10	3	1	625
68	0	10	4	1	1016,666667
69	0	11	0	0	141,1764706
70	0	11	1	0	102,7272727
71	0	11	3	0	128,2828283
72	0	12	0	1	512,5
73	0	12	2	1	325
74	0	13	5	1	207,2289157
75	0	13	6	1	166,8674699
76	0	13	7	1	168,3908046
77	0	13	8	1	232,5396825
78	0	13	9	1	218,3823529
79	0	13	9	1	203,4965035
80	0	13	10	1	190,7284768
81	0	13	11	1	164,7727273
82	0	13	12	1	139,1705069
83	0	13	13	1	118,9655172
84	0	14	1	0	155,0724638
85	0	15	13	1	266,4772727
86	0	15	14	1	285,8895706
87	0	15	15	1	250
88	0	15	16	1	281,0526316
89	0	15	17	1	249,5575221
90	0	15	18	1	283,0845771
91	0	15	19	1	222,310757
92	0	15	20	1	253,2751092
93	0	16	11	1	229,4117647
94	0	16	12	1	287,0588235
95	0	16	13	1	509,5238095
96	0	16	14	1	323,6111111
97	0	16	15	1	200,8064516
98	0	16	16	1	158,974359
99	0	16	17	1	186,3945578
100	0	16	18	1	283,9506173
101	0	16	19	1	368,5714286
102	0	17	1	0
103	0	17	2	0	143,9716312
104	0	17	4	0	179,7297297
105	0	18	0	1	394,4444444
106	0	18	2	1	220,2531646
107	0	18	2	1	353,4482759
108	0	18	3	1	378,9473684
109	0	18	4	1	344,7761194
110	0	19	0	1	81,25
111	0	19	1	1	109,352518
112	0	19	3	1	125,477707
113	0	20	0	0	256,3829787
114	0	20	1	0	178,0141844
115	0	20	3	0	270,5357143
116	0	21	0	1	213,4146341
117	0	22	0	0	178,7610619
118	0	23	0	0	380
119	0	24	0	0	167,7083333
120	0	25	0	1	323,255814
121	0	26	0	0	396,875
122	0	27	0	0	136,6666667
123	0	28	0	0	147,0238095
124	0	29	0	0	210,1123596
125	0	30	0	1
126	0	30	4	1	236,0465116
127	0	31	0	0	786,2745098
128	0	32	0	1	511,5384615
129	0	33	0	1	234,7222222
130	0	34	0	1
131	0	35	0	0	181,8897638
132	0	36	0	1	83,98950131
133	0	37	0	0	397,7272727
134	0	38	0	1	246,3768116
135	0	39	0	0	297,826087
136	0	40	0	0	85,39325843
137	0	41	0	0	155,46875
138	0	42	0	0	79,90196078
139	0	43	0	0	125,9259259
140	0	44	0	0	260
141	0	45	0	1	462,6506024
142	0	45	1	1
143	0	45	1	1
144	0	45	2	1	682,6923077
145	0	45	3	1
146	0	45	4	1	255,8139535
147	0	45	5	1	226,4
148	0	45	5	1
149	0	45	6	1	275,4385965
150	0	45	6	1
151	0	45	7	1	440,9638554
152	0	45	7	1
153	0	45	8	1	652,7027027
154	0	45	9	1	781,5789474
155	0	45	10	1	768,2926829
156	0	45	11	1	600
157	0	45	12	1	429,6296296
158	0	45	13	1	270,6666667
159	0	45	14	1	300,6802721
160	0	45	15	1	227,8145695
161	0	45	16	1	231,25
162	0	45	17	1	227,8195489
163	0	45	18	1	190,7894737
164	0	45	19	1	201,4184397
165	0	45	20	1	191,3580247
166	0	45	21	1	195,8083832
167	0	45	22	1	130,3030303
168	0	46	0	0	289,1304348
169	0	47	0	0	85,02415459
170	0	48	0	1	500
171	0	49	0	1
172	0	50	0	0	126,5486726
173	0	51	0	0	157
174	0	52	0	1	188,7096774
175	0	53	0	1	500
176	0	54	0	1	222,5
177	0	54	4	1	288,4057971
178	0	54	10	1	555,1724138
179	0	54	11	1	696,7213115
180	0	55	0	0	65,04854369
181	0	56	0	1	177,9069767
182	0	57	0	0	224,5762712
183	0	58	0	0	116
184	0	59	0	0	140,9448819
185	0	60	0	0	448,3870968
186	0	61	0	0	123,7410072
187	0	62	0	1	518,1818182
188	0	63	0	0	168,75
189	0	64	0	0	110,989011
190	0	65	0	0
191	0	66	0	1	320,3125
192	0	67	0	0
193	0	68	0	0	303,030303
194	0	69	0	0	96,7032967
195	0	70	0	0	235
196	0	71	0	0	207,9545455
197	0	72	0	0	148,3333333
198	0	73	0	0	175,8064516
199	0	74	0	0	236,1702128
200	0	75	0	0	119,375
201	0	76	0	0
202	0	77	0	0	170,8860759
203	0	78	0	1	289,0909091
204	0	79	0	0	114,8648649
205	0	79	0	0
206	0	79	1	0
207	0	79	2	0
208	0	79	3	0	87,21804511
209	0	79	5	0	90,29850746
210	0	79	7	0
211	0	79	8	0	129,3103448
212	0	79	9	0
213	0	79	10	0	121,0526316
214	0	79	12	0	160,7526882
215	0	80	0	0	183,6734694
216	0	81	0	1	225,8064516
217	0	82	0	0	406,25
218	0	83	0	0	221,1111111
220	0	85	0	1	790
221	0	86	0	1	353,164557
222	0	87	0	0	136,2068966
223	0	88	0	0	89,72972973
225	0	90	0	0	186,3157895
226	0	91	0	0	179,6610169
227	0	92	0	0	227,2727273
228	0	93	0	1	345,6521739
229	0	93	1	1
230	0	93	2	1	342,6470588
231	0	94	0	0	169,6
232	0	95	0	0	57,8125
233	0	96	0	1	454,0540541
234	0	97	0	0	280
235	0	98	0	0	176,4044944
236	0	98	2	0	166,3551402
237	0	98	4	0
238	0	98	5	0
239	0	98	13	0	178,9808917
240	0	99	0	1	143,0769231
241	0	99	1	1	109,9337748
242	0	99	2	1
243	0	99	3	1
244	0	99	4	1
245	0	99	5	1
246	0	100	0	1	347,9452055
247	0	101	0	1	282,5
248	0	102	0	0	606,4516129
249	0	103	0	1	637,037037
250	0	103	1	1	373,3333333
251	0	104	0	1	185,1351351
252	0	105	0	0	302,2988506
253	0	106	0	1	195,2380952
254	0	107	0	0	192,0634921
255	0	108	0	0	212,8712871
256	0	109	0	1	130,2083333
257	0	110	0	0	110
258	0	110	1	0
259	0	110	2	0
260	0	110	3	0
261	0	110	4	0
262	0	110	5	0
263	0	110	6	0
264	0	110	7	0
265	0	110	7	0
266	0	110	8	0	248,3870968
267	0	110	9	0	169,6721311
268	0	110	10	0	175,4098361
269	0	110	11	0	184,2519685
270	0	110	12	0	170,1388889
271	0	110	13	0	192,4137931
272	0	110	16	0	132,7683616
273	0	110	17	0	150
274	0	110	20	0	115,5339806
275	0	111	0	0	184,375
276	0	112	0	0	193,9393939
277	0	113	0	0	138,7755102
278	0	114	0	1	142,6666667
279	0	115	0	1	207,0866142
280	0	116	0	1	128,3870968
281	0	117	0	0	236,5853659
282	0	118	0	1	328,3018868
283	0	119	0	1	156,8421053
284	0	120	0	1	437,8378378
285	0	121	0	1	78,40375587
286	0	122	0	0	284,2105263
287	0	122	4	0
288	0	122	7	0
289	0	122	9	0
290	0	123	0	1	102,2556391
291	0	124	0	0	228,9719626
292	0	125	0	0	96,17834395
293	0	126	0	1	200
294	0	126	2	1	275,3424658
295	0	127	0	0	150
296	0	127	4	0	89,04109589
297	0	128	0	1	118,1818182
298	0	129	0	0	187,0967742
299	0	130	0	1	202,173913
300	0	131	0	1	178
301	0	132	0	1	174,6666667
302	0	133	0	1	195,3488372
303	0	134	0	1	365
304	0	134	2	1	416
305	0	134	3	1	578,2608696
306	0	135	0	0	229,4871795
307	0	136	0	0	234
308	0	136	5	0	560
309	0	136	7	0	547,2727273
310	0	136	8	0
311	0	136	9	0	692,1568627
312	0	136	10	0	603,5087719
313	0	136	11	0	506,4102564
314	0	136	12	0	414,6067416
315	0	136	13	0	382,8828829
316	0	136	14	0	364,6017699
317	0	137	0	1	541,8181818
318	0	137	1	1	392,7536232
319	0	137	2	1
320	0	137	4	1	1010,714286
321	0	138	0	0	135,8024691
322	0	139	0	0	149,2424242
323	0	140	0	0	145,2554745
324	0	140	2	0	141,6666667
325	0	140	6	0	146,875
326	0	141	0	0	162,3188406
327	0	142	0	1	386,1538462
328	0	143	0	1	398,9690722
329	0	144	0	0	130,4878049
330	0	145	0	0	207,6923077
331	0	146	0	0	254,4117647
332	0	147	0	1	322,3880597
333	0	148	0	1	1100
334	0	149	0	0	155,1401869
335	0	150	0	1	47,76119403
336	0	151	0	1	284,6153846
337	0	152	0	0	139,3063584
338	0	153	0	0	462,1621622
339	0	154	0	0	106,4935065
340	0	155	0	0	287,6712329
341	0	156	0	0	257,2916667
342	0	157	0	1	67,51054852
343	0	158	0	0	216,6666667
344	0	159	0	0	552,6315789
345	0	160	0	0	104
346	0	161	0	1	180,9859155
347	0	162	0	1	241,1764706
348	0	163	0	0	226,1261261
349	0	164	0	1	189,1891892
350	0	165	0	1	424,2424242
351	0	166	0	1	88,13559322
352	0	167	0	0	220,6349206
353	0	168	0	0	97,24137931
355	0	170	0	0	440
356	0	171	0	0	134,1666667
357	0	172	0	0	173,8562092
358	0	173	0	1	225,3968254
359	0	174	0	0	118,4397163
360	0	175	0	1	219,2307692
361	0	176	0	0	98,72611465
362	0	177	0	0	607,3529412
363	0	178	0	1	187
364	0	179	0	0	269,0909091
365	0	179	2	0
366	0	179	3	0
367	0	179	5	0	596,2264151
368	0	179	6	0
369	0	179	6	0
370	0	179	7	0
371	0	179	8	0
372	0	179	9	0	1080
373	0	179	10	0	1059,52381
374	0	179	11	0
375	0	179	12	0	529,8701299
376	0	179	13	0
377	0	179	14	0	374,4444444
378	0	179	15	0
379	0	179	16	0	229,5081967
380	0	180	0	1	428,125
381	0	181	0	0	135,3846154
382	0	182	0	0	104,0540541
383	0	183	0	0	155,9633028
384	0	184	0	0	110,952381
385	0	185	0	0	80,8988764
386	0	186	0	1	107,9646018
387	0	187	0	0	293,75
388	0	188	0	1	205,4054054
389	0	189	0	1	200
390	0	189	2	1
391	0	189	4	1	240,9090909
392	0	190	0	0	64,17112299
393	0	191	0	0	122,0930233
394	0	192	0	0	339,0243902
395	0	193	0	0	95,33678756
396	0	194	0	1	234,7826087
397	0	195	0	0	76,11940299
398	0	196	0	1	182,5581395
399	0	197	0	0	118,8034188
400	0	198	0	0	177,9527559
401	0	199	0	1	243,8356164
402	0	200	0	1	131,1111111
403	0	201	0	1	343,5294118
404	0	202	0	1	237,037037
405	0	203	0	1	403,9215686
406	0	204	0	0	283,2298137
407	0	205	0	0	212,195122
408	0	206	0	0	167,9012346
409	0	207	0	0	203,0927835
410	0	208	0	1	83,33333333
411	0	209	0	0	122,6804124
412	0	210	0	1	1378,947368
413	0	211	0	0	88,46153846
414	0	212	0	1	136,9863014
415	0	213	0	1	123,2
416	0	214	0	1	279,4871795
417	0	215	0	1	126,0869565
418	0	216	0	0	116,2601626
419	0	216	2	0	126,8292683
420	0	216	3	0
421	0	216	4	0	161,5384615
422	0	216	6	0
423	0	216	7	0
424	0	216	9	0	217,4358974
425	0	217	0	1	81,45695364
426	0	217	3	1	141,1764706
427	0	217	5	1	271,7948718
428	0	217	7	1
429	0	218	0	0	104,4692737
430	0	219	0	0	163,8655462
431	0	220	0	1	309,5652174
432	0	221	0	0	255,5555556
433	0	222	0	0	344,1558442
434	0	223	0	1	99,24242424
435	0	224	0	1	240,7894737
436	0	225	0	1	110,1694915
437	0	226	0	0	191,8604651
438	0	227	0	0	207,7922078
439	0	228	0	0	200
440	0	229	0	0	287,3417722
441	0	230	0	0	67,09677419
442	0	231	0	1	295,9183673
443	0	232	0	0	458,2278481
444	0	233	0	0	143,3823529
445	0	234	0	0	146,031746
446	0	235	0	0	207,9365079
447	0	236	0	0	179,4871795
448	0	237	1	1	243,3333333
449	0	237	1	1	334,7826087
450	0	237	1	1	270,3703704
451	0	237	2	1	229,4117647
452	0	237	3	1	178,5714286
453	0	237	4	1	138,0952381
454	0	237	5	1	50
455	0	238	11	1	153,6
456	0	238	12	1	87,94326241
457	0	238	13	1	72,58883249
458	0	238	14	1	98,83040936
459	0	238	15	1	100,9852217
460	0	238	16	1	136,1256545
461	0	239	0	0	338,3561644
462	0	240	1	0	183,3333333
463	0	240	3	0	453,8461538
464	0	240	4	0	425,862069
465	0	241	0	1	355,5555556
466	0	241	0	1	377,1428571
467	0	241	1	1	303,0927835
468	0	241	2	1	403,2258065
469	0	241	2	1	366,1971831
470	0	241	3	1	535,1851852
471	0	241	4	1	860
472	0	241	5	1	642,6229508
473	0	241	5	1	409,5890411
474	0	241	6	1	585,5072464
475	0	242	0	1	560,4166667
476	0	242	1	1	550
477	0	242	1	1	822,2222222
478	0	242	1	1	485,1851852
479	0	242	2	1	341,0714286
480	0	242	2	1	368,627451
481	0	243	8	1	457,5757576
482	0	243	9	1	448,5148515
483	0	243	9	1	675,7575758
484	0	243	10	1	617,9104478
485	0	243	11	1	780,3571429
486	0	244	2	0	248,0392157
487	0	244	6	0	261,3138686
488	0	245	2	1	245,6521739
489	0	246	0	0	331,8181818
490	0	246	2	0	338,6666667
491	0	247	2	0	710
492	0	247	4	0	760,7843137
493	0	247	5	0	618,1818182
494	0	247	6	0	611,4285714
495	0	248	1	0	116,2790698
496	0	248	2	0	194,4444444
497	0	248	3	0	216,091954
498	0	248	4	0	239,5833333
499	0	249	2	1	452,3076923
500	0	249	3	1	658
501	0	249	3	1	408,6956522
502	0	249	4	1	457,5
503	0	249	4	1	477,2727273
504	0	249	4	1	594,8717949
505	0	249	5	1	438,4615385
506	0	249	6	1	267,6923077
507	0	249	7	1	216
508	0	250	2	0	183,3333333
509	0	250	5	0	253,1914894
510	0	250	6	0	225,5681818
511	0	251	2	0	395,6140351
512	0	251	3	0	250,273224
513	0	251	5	0	319,4444444
514	0	252	7	1	242,6356589
515	0	252	8	1	301,8518519
516	0	252	9	1	240
517	0	252	10	1	207,0422535
518	0	252	11	1	187,4213836
519	0	252	12	1	262,5
520	0	253	6	1	427,9411765
521	0	253	7	1	386,3013699
522	0	253	7	1	351,8518519
523	0	253	7	1	352,7777778
524	0	253	7	1	404,3478261
525	0	253	8	1	318,6046512
526	0	253	9	1	432,4324324
527	0	254	6	1	828,125
528	0	255	6	0	212,6436782
529	0	255	7	0	153,9823009
530	0	255	8	0	108,3870968
531	0	255	9	0	84,52380952
532	0	255	10	0	94,9044586
533	0	256	1	0	256,4102564
534	0	256	2	0	171,4285714
535	0	257	1	1	237,5
536	0	257	3	1	379,1666667
537	0	257	4	1	623,4042553
538	0	257	5	1	620,6896552
539	0	258	2	0	216,9491525
540	0	258	3	0	264,516129
541	0	259	7	0	280,4878049
542	0	259	8	0	280,1526718
543	0	260	0	1	444,7761194
544	0	260	2	1	485,2941176
545	0	260	4	1	610,3448276
546	0	260	5	1	641,6666667
547	0	260	6	1	313,4146341
548	0	261	6	1	352,5641026
549	0	261	7	1	314,893617
550	0	261	8	1	257,8512397
551	0	261	9	1	321,5909091
552	0	261	11	1	353,8461538
553	0	261	12	1	291,2621359
554	0	261	12	1	349,4117647
555	0	262	2	0	276,9230769
556	0	262	4	0	510,2564103
557	0	262	5	0	373,7704918
558	0	262	6	0	449,1525424
559	0	262	7	0	431,7073171
560	0	263	7	0	302,0618557
561	0	263	11	0	607,6923077
562	0	263	12	0	350,4065041
563	0	264	3	0	139,6226415
564	0	264	4	0	159
565	0	264	5	0	224,6575342
566	0	264	7	0	219,1489362
567	0	265	0	1	280,4347826
568	0	265	1	1	219,6078431
569	0	265	2	1	139,5061728
570	0	266	0	1	115,4639175
571	0	266	4	1	246,7741935
572	0	266	5	1	321,6666667
573	0	266	6	1	347,3684211
574	0	266	7	1	382,1428571
575	0	267	0	0	144,4444444
576	0	267	2	0	154,676259
577	0	268	2	1	812,2222222
578	0	268	2	1	932,8358209
579	0	268	3	1	492,96875
580	0	268	3	1	477,6119403
581	0	269	4	0	169,8347107
582	0	270	3	1	595,2380952
583	0	270	4	1	709,375
584	0	270	5	1	996
585	0	271	7	1	1270,967742
586	0	271	8	1	1134,210526
587	0	271	9	1	880,4347826
588	0	271	9	1	788,2352941
589	0	272	0	0	223,655914
590	0	272	2	0	329,3103448
591	0	272	5	0	304,7619048
592	0	273	0	0	252,3809524
593	0	274	1	0	252,173913
594	0	274	3	0	548,3870968
595	0	274	4	0	450
596	0	275	2	1	311,1111111
597	0	275	3	1	245,1612903
598	0	275	4	1	388,0952381
599	0	275	5	1	345,7627119
600	0	275	6	1	414,5833333
601	0	275	7	1	426,5306122
602	0	276	6	0	174,0384615
603	0	276	8	0	117,9775281
604	0	276	9	0	276,6233766
605	0	277	2	0	346,0869565
606	0	277	4	0	415,9090909
607	0	277	6	0	367,2131148
608	0	277	7	0	344,549763
609	0	278	2	0	328,2352941
610	0	278	3	0	364,1791045
611	0	278	4	0	487,3015873
612	0	279	0	0	67,07317073
613	0	279	2	0	96,55172414
614	0	279	6	0	142,7745665
615	0	279	9	0	257,6086957
616	0	280	0	0	228,125
617	0	281	16	1	471,9101124
618	0	282	5	0	200,6666667
619	0	283	1	1	179,2792793
620	0	284	4	0	173,3333333
621	0	284	5	0	207,5471698
622	0	284	6	0	205,9171598
623	0	284	7	0	232,0855615
624	0	285	1	0	266,9421488
625	0	285	3	0	241,1347518
626	0	285	4	0	276,3888889
627	0	286	0	0	140,8450704
628	0	286	2	0	178,0487805
629	0	286	3	0	143,7125749
630	0	286	5	0	245,3846154
631	0	287	4	0	192,9577465
632	0	287	6	0	207,3170732
633	0	288	7	1	243,75
634	0	288	8	1	281,1320755
635	0	288	8	1	284,6153846
636	0	288	9	1	257,8512397
637	0	288	9	1	256
638	0	288	9	1	245,9677419
639	0	288	9	1	184,3930636
640	0	288	10	1	153,4031414
641	0	288	11	1	174,4565217
642	0	288	11	1	147,9381443
643	0	288	11	1	199,2125984
644	0	289	2	0	112,0879121
645	0	290	2	0	664,1025641
646	0	290	4	0	556,8181818
647	0	290	6	0	531,8181818
648	0	291	2	0	390,9090909
649	0	291	4	0	286,8686869
650	0	291	6	0	316,8421053
651	0	292	3	1	215,1162791
652	0	292	4	1	220,3703704
653	0	292	5	1	286,7346939
654	0	293	15	0	1631,578947
655	0	293	17	0	831,372549
656	0	294	4	0	234,0909091
657	0	294	6	0	276,9230769
658	0	294	7	0	358,6956522
659	0	295	25	1	234,4262295
660	0	296	3	0	130
661	0	296	4	0	200,7633588
662	0	297	2	0	129,4642857
663	0	297	4	0	175,4716981
664	0	298	0	0	91,92546584
665	0	298	2	0	95,51282051
666	0	298	3	0	140,8
667	0	298	4	0	162,2047244
668	0	298	5	0	164,7887324
669	0	299	3	0	313,75
670	0	299	5	0	406,4935065
671	0	299	7	0	394,9367089
672	0	300	2	0	1088,235294
673	0	300	3	0	685,7142857
674	0	300	4	0	1393,333333
675	0	300	6	0	817,1428571
676	0	301	0	0	171,7391304
677	0	301	9	0	119,2
678	0	301	12	0	165,7894737
679	0	302	2	0	102,020202
680	0	302	3	0	69,56521739
681	0	302	4	0	103,90625
682	0	303	2	0	271,6216216
683	0	304	2	0	369,0909091
684	0	305	3	0	355,952381
685	0	305	4	0	335,5769231
686	0	306	1	0	228,5714286
687	0	307	1	1	246,6666667
688	0	307	3	1	428,8135593
689	0	307	4	1	505
690	0	308	1	1	152,8571429
691	0	308	2	1	167,1428571
692	0	309	1	1	266,6666667
693	0	309	2	1	226,0869565
694	0	309	3	1	306,1728395
695	0	309	3	1	313,1578947
696	0	309	4	1	333,3333333
697	0	310	1	0	310,6060606
698	0	310	3	0	276,8421053
699	0	310	4	0	305,8252427
700	0	311	2	0	474,2857143
701	0	311	3	0	429,4871795
702	0	311	4	0	330,4761905
703	0	312	2	0	427,9069767
704	0	312	3	0	512,8205128
705	0	313	2	0	97,4789916
706	0	313	3	0	105,0420168
707	0	313	4	0	107,6923077
708	0	314	2	0	152,0737327
709	0	314	3	0	178,6363636
710	0	314	4	0	205,2380952
711	0	315	2	1	252,8735632
712	0	316	2	0	122,3880597
715	0	318	1	0	132,9896907
716	0	318	2	0	102
717	0	318	4	0	122,8571429
718	0	318	7	0	182,4175824
719	0	318	9	0	216,6666667
720	0	319	2	1	766,6666667
721	0	319	3	1	555,3191489
722	0	319	4	1	355,8441558
723	0	319	5	1	414,6341463
724	0	319	6	1	408
725	0	319	9	1	694,5652174
726	0	319	10	1	682,3529412
727	0	319	11	1	701,8018018
728	0	319	12	1	464,2458101
729	0	319	13	1	715,1785714
730	0	320	0	1	712,244898
731	0	321	0	0	369,6202532
732	0	321	3	0	218,134715
733	0	322	0	0	278,4615385
734	0	322	1	0	217,8571429
735	0	323	0	0	146,0674157
736	0	323	4	0	145,6521739
737	0	324	3	0	37,5
738	0	325	2	0	251,0791367
739	0	326	0	1	986,4864865
740	0	326	1	1	782
741	0	326	2	1	1517,391304
742	0	326	3	1	893,0232558
743	0	326	4	1	977,7777778
744	0	327	1	0	471,6981132
745	0	328	2	1	214,9253731
746	0	328	3	1	133,6734694
747	0	329	0	0	291,5662651
748	0	329	1	0	281,0810811
749	0	329	2	0	210,989011
750	0	329	3	0	210
751	0	330	0	0	1113,636364
752	0	331	8	1	306,122449
753	0	331	9	1	255,7692308
754	0	331	10	1	322,2222222
755	0	331	11	1	243,1034483
756	0	331	14	1	459,7014925
757	0	331	15	1	510,8108108
758	0	331	16	1	436,440678
759	0	331	17	1	507,0175439
760	0	331	18	1	589,8148148
761	0	332	0	1	101,754386
762	0	332	0	1	145,4545455
763	0	333	5	1	348,1481481
764	0	333	6	1	290
765	0	333	7	1	224,0196078
766	0	334	2	0	227,2727273
767	0	334	3	0	217,5757576
768	0	335	10	1	312,2137405
769	0	335	11	1	183,2116788
770	0	335	12	1	344,2857143
771	0	335	13	1	509,1743119
772	0	335	14	1	335,2941176
773	0	335	19	1	348,630137
774	0	335	20	1	342,0689655
775	0	335	21	1	187,7470356
776	0	336	1	1	98,8372093
777	0	337	0	0	264,2857143
778	0	338	3	0	220
779	0	339	0	0	282,1428571
780	0	340	0	0	35,7827476
781	0	341	9	1	624,3243243
782	0	341	12	1	832,4675325
783	0	341	13	1	901,3157895
784	0	341	14	1	797,4683544
785	0	341	15	1	1400
786	0	341	16	1	970,8333333
787	0	341	21	1	2508
788	0	341	22	1	1348,979592
789	0	341	23	1	888,4615385
790	0	342	0	0	206,0344828
791	0	343	3	0	194,2307692
792	0	344	0	0	455,2631579
793	0	345	2	1	209,0909091
794	0	346	0	0	160,3448276
795	0	346	3	0	181,1965812
796	0	347	10	0	201,5151515
797	0	347	11	0	167,1171171
798	0	348	3	1	473,3333333
799	0	348	6	1	430
800	0	349	4	1	232,1678322
801	0	349	4	1	257,0175439
802	0	349	5	1	350
803	0	349	6	1	531,1827957
804	0	349	7	1	584,375
805	0	349	12	1	258,8235294
806	0	349	13	1	311,1702128
807	0	349	14	1	273,3333333
808	0	349	15	1	257,3684211
809	0	350	5	1	398,8636364
810	0	350	8	1	390,3225806
811	0	350	9	1	462,992126
812	0	350	10	1	476,8115942
813	0	350	11	1	513,7254902
814	0	350	12	1	467,1328671
815	0	350	17	1	405,5248619
816	0	350	18	1	477,9069767
817	0	350	19	1	423,1213873
818	0	351	5	0	250,5813953
819	0	352	0	0	189,8550725
820	0	352	2	0	126,6129032
821	0	353	2	1	228,2258065
822	0	353	3	1	326,5060241
823	0	353	4	1	347
824	0	354	3	0	321,5189873
825	0	355	1	1	685,7142857
826	0	355	5	1	1082
827	0	355	6	1	1754,83871
828	0	355	7	1	1482,352941
829	0	355	8	1	1056,818182
830	0	355	11	1	1508,888889
831	0	355	12	1	1775
832	0	355	13	1	1491,489362
833	0	355	14	1	1722
834	0	355	15	1	1480
835	0	356	2	1	96,96969697
836	0	356	5	1	263,5135135
837	0	356	6	1	237,5
838	0	356	7	1	317,8947368
839	0	356	8	1	389,1304348
840	0	356	9	1	625,7575758
841	0	356	12	1	296,3768116
842	0	356	13	1	311,3821138
843	0	356	14	1	297,8873239
844	0	356	15	1	386,5546218
845	0	356	16	1	342,8571429
846	0	357	0	0	212,5
847	0	358	0	0	102,2026432
848	0	359	1	0	218,9473684
849	0	359	3	0	272
850	0	359	9	0	300,5747126
851	0	360	1	1	179,2792793
852	0	360	2	1	136,3057325
853	0	360	3	1	220,5882353
854	0	360	4	1	262,3076923
855	0	360	7	1	255,2631579
856	0	360	8	1	242,8571429
857	0	360	9	1	172,7272727
858	0	360	10	1	445,2054795
859	0	360	10	1	346,0674157
860	0	360	11	1	408,496732
861	0	361	1	1	379,0322581
862	0	361	2	1	619,3548387
863	0	361	9	1	787,8787879
864	0	361	10	1	449,1525424
865	0	361	11	1	774
866	0	362	0	0	74,54545455
867	0	363	2	0	453,6585366
868	0	364	4	0	302,4390244
869	0	364	6	0	398,3739837
870	0	365	0	0	174,4897959
871	0	365	5	0	286,875
872	0	365	6	0	275,7142857
873	0	365	7	0	254,6728972
874	0	365	8	0	281,6216216
875	0	365	9	0	275,5208333
876	0	366	3	0	268,1818182
877	0	367	0	0	196,2962963
878	0	367	2	0	211,1111111
879	0	368	10	1	290
880	0	369	3	0	503,5714286
881	0	369	5	0	485,5263158
882	0	369	8	0	424,5614035
883	0	370	0	0	250
884	0	371	0	0	83,01886792
885	0	372	5	0	373,6111111
886	0	373	0	0	224,6376812
887	0	374	0	0	790,7407407
888	0	375	0	0	1064,705882
889	0	375	2	0	1228,571429
890	0	375	6	0	900
891	0	376	0	0	304,5977011
892	0	376	0	0	287,037037
893	0	377	0	1	69,51219512
894	0	377	1	1	191,0714286
895	0	377	2	1	98,33333333
896	0	377	5	1	36,19047619
897	0	377	6	1	36,95652174
898	0	377	7	1	39,69465649
899	0	377	8	1	50,35971223
900	0	377	9	1	63,93442623
901	0	378	0	1	488,4615385
902	0	378	2	1	408,974359
903	0	378	3	1	322,3529412
904	0	378	6	1	301,1235955
905	0	378	7	1	312,5
906	0	378	8	1	252,7272727
907	0	378	9	1	237,5
908	0	378	10	1	161,2903226
909	0	379	0	0	240,7407407
910	0	380	0	0	97,19101124
911	0	381	2	0	169,5238095
912	0	382	2	1	317,1875
913	0	383	4	0	154,5454545
914	0	384	1	1	181,0218978
915	0	384	2	1	230,6451613
916	0	384	5	1	170,6666667
917	0	384	6	1	181,938326
918	0	384	7	1	347,826087
919	0	384	8	1	168,125
920	0	384	8	1	144,0540541
921	0	385	1	1	206,6666667
922	0	386	0	0	221,5053763
923	0	386	1	0	302,8571429
924	0	387	4	0	86,02150538
925	0	388	1	0	344,7761194
926	0	389	2	0	290,9090909
927	0	389	6	0	232,5301205
928	0	390	2	0	434,5454545
929	0	390	6	0	381,25
930	0	390	10	0	677,8947368
931	0	391	0	1	1209,375
932	0	392	2	1	429,4871795
933	0	392	5	1	626,3157895
934	0	393	5	0	257,1428571
935	0	394	2	0	395
936	0	395	2	0	140,8536585
937	0	396	2	0	208
938	0	397	2	0	201,4285714
939	0	397	5	0	412,5
940	0	398	6	0	467,9012346
941	0	399	2	0	284,4444444
942	0	400	0	0	545,6521739
943	0	400	1	0	355,9322034
944	0	400	4	0	271,5909091
945	0	401	4	1	155,0724638
946	0	401	5	1	88,88888889
947	0	401	6	1	62,88659794
948	0	401	7	1	72
949	0	401	8	1	84,55284553
950	0	402	3	0	99,2
951	0	403	2	0	334,5794393
952	0	404	2	0	240,1408451
953	0	405	2	1	146,3414634
954	0	405	5	1	192,4050633
955	0	405	5	1	117,3076923
956	0	405	6	1	157,9545455
957	0	406	0	1	411,4285714
958	0	406	2	1	396,3855422
959	0	406	3	1	354,7368421
960	0	406	4	1	208,1871345
961	0	407	2	0	320
962	0	407	6	0	825,9259259
963	0	407	7	0	1133,333333
964	0	407	9	0	1055,172414
965	0	407	13	0	948,9361702
966	0	408	0	0	135,5769231
967	0	408	3	0	279,1666667
968	0	409	2	0	331,8181818
969	0	409	5	0	488,9705882
970	0	410	0	0	535,8490566
971	0	410	2	0	913,5135135
972	0	411	0	0	292
973	0	412	2	1	689,1304348
974	0	412	5	1	429,4117647
975	0	412	6	1	422,2222222
976	0	413	0	1	439,6825397
977	0	413	3	1	544,0677966
978	0	413	4	1	630,5084746
979	0	413	5	1	914
980	0	413	6	1	850
981	0	413	7	1	720,9876543
982	0	414	1	0	215,5555556
983	0	415	1	0	163,7254902
984	0	416	0	0	248,2758621
985	0	416	1	0	203,0927835
986	0	417	0	0	255,6034483
987	0	417	1	0	247,0588235
988	0	417	2	0	272,5581395
989	0	417	4	0	296,0893855
990	0	417	7	0	276,8041237
991	0	417	9	0	249,5283019
992	0	418	13	0	318,1818182
993	0	418	14	0	369,0140845
994	0	418	17	0	559,2592593
995	0	418	18	0	591,5254237
996	0	418	19	0	1200
997	0	418	21	0	1046
998	0	418	24	0	1378,431373
999	0	418	26	0	592,6470588
1000	0	419	0	0	404,8780488
1001	0	419	2	0	587,6923077
1002	0	419	3	0	485,2631579
1003	0	420	0	1	307,4074074
1004	0	420	1	1	168,0851064
1005	0	421	0	1	107,8740157
1006	0	421	0	1	192,4242424
1007	0	422	0	1	468,4210526
1008	0	422	1	1	470,2702703
1009	0	422	2	1	583,7837838
1010	0	423	0	1	256,7164179
1011	0	423	2	1	522,8571429
1012	0	423	4	1	457,8947368
1013	0	424	0	0	370,8333333
1014	0	424	1	0	370,6666667
1015	0	424	5	0	942,1052632
1016	0	424	7	0	1078,571429
1017	0	425	12	1	119,3277311
1018	0	426	0	1	121,6494845
1019	0	427	0	1	330,8823529
1020	0	427	1	1	329,7297297
1021	0	428	0	0	98,6013986
1022	0	428	3	0	192,5925926
1023	0	428	4	0	194,2307692
1024	0	428	6	0	242,6229508
1025	0	429	0	1	252,3255814
1026	0	429	1	1	162,7737226
1027	0	429	2	1	171,4285714
1028	0	429	5	1	167,2131148
1029	0	429	8	1	274,796748
1030	0	429	11	1	344,1860465
1031	0	430	1	1	327,2727273
1032	0	431	0	0	125,3012048
1033	0	432	0	0	276,4705882
1034	0	432	1	0	266,2337662
1035	0	432	3	0	118,0555556
1036	0	433	0	0	414,4578313
1037	0	433	1	0	346,4646465
1038	0	433	2	0	488,8888889
1039	0	434	0	0	592,9824561
1040	0	434	1	0	743,4782609
1041	0	434	3	0	701,8181818
1042	0	434	5	0	814,7540984
1043	0	434	7	0	647,311828
1044	0	435	8	0	525,4901961
1045	0	435	11	0	191,8699187
1046	0	436	0	1	162,5
1047	0	437	0	1	314,4736842
1048	0	437	2	1	376,9230769
1049	0	438	0	0	169,0909091
1050	0	438	2	0	270,2702703
1051	0	438	4	0	290,8045977
1052	0	439	0	1	442,5925926
1053	0	439	2	1	270,8333333
1054	0	440	2	0	179,047619
1055	0	441	0	0	328,4313725
1056	0	441	1	0	388,0597015
1057	0	441	3	0	278,8990826
1058	0	442	0	1	101,6949153
1059	0	442	1	1	63,43283582
1060	0	442	2	1	92,1875
1061	0	442	3	1	91,13300493
1062	0	442	6	1	185,1851852
1063	0	443	0	1	478,125
1064	0	443	2	1	297,7777778
1065	0	443	4	1	311,3207547
1066	0	443	5	1	526,8292683
1067	0	444	0	1	288,6178862
1068	0	444	1	1	456,1643836
1069	0	445	0	0	129,2134831
1070	0	445	1	0	232,6530612
1071	0	445	6	0	280,952381
1072	0	445	8	0	239,2857143
1073	0	445	10	0	178,4615385
1074	0	445	13	0	183,8383838
1075	0	446	2	1	187,8787879
1076	0	446	6	1	154,2253521
1077	0	446	8	1	181,097561
1078	0	446	11	1	299,1735537
1079	0	446	18	1	300,9090909
1080	0	446	20	1	341,9642857
1081	0	447	1	0	641,6666667
1082	0	447	3	0	715,9090909
1083	0	447	6	0	692,7536232
1084	0	447	8	0	589,5348837
1085	0	447	10	0	653,4246575
1086	0	447	13	0	691,7808219
1087	0	448	0	0	148,1132075
1088	0	448	2	0	197,1428571
1089	0	449	0	0	275,3424658
1090	0	449	1	0	358,1081081
1091	0	449	4	0	560
1092	0	449	6	0	553,9215686
1093	0	449	8	0	493,4210526
1094	0	450	0	0	558,3333333
1095	0	450	2	0	310,1265823
1096	0	450	3	0	403
1097	0	450	5	0	369,4444444
1098	0	451	0	0	242,0289855
1099	0	452	0	1	239,4230769
1100	0	453	0	1	277,4193548
1101	0	453	4	1	510,2040816
1102	0	453	6	1	667,6470588
1103	0	453	8	1	543,902439
1104	0	454	7	0	455,7522124
1105	0	454	10	0	289,3048128
1106	0	455	0	1	143,3962264
1107	0	455	2	1	269,4117647
1108	0	455	4	1	401,2987013
1109	0	456	0	0	373,4693878
1110	0	456	4	0	159,1463415
1111	0	457	1	0	191,1764706
1112	0	457	3	0	217,3333333
1113	0	457	5	0	208,75
1114	0	457	8	0	327,9411765
1115	0	457	10	0	306,4516129
1116	0	457	12	0	219,5488722
1117	0	458	0	0	290,5882353
1118	0	458	1	0	236,5384615
1119	0	459	0	1	476,4705882
1120	0	460	0	1	205,4545455
1121	0	460	2	1	171,875
1122	0	461	0	0	502,1276596
1123	0	461	3	0	473,8461538
1124	0	462	1	0	353,8461538
1125	0	463	0	1	503,1746032
1126	0	464	0	0	298,6111111
1127	0	464	1	0	334,751773
1128	0	464	3	0	428,0701754
1129	0	465	0	0	528,125
1130	0	465	3	0	266,4556962
1131	0	466	0	0	248,8888889
1132	0	467	0	0	307,0422535
1133	0	468	0	1	220,6349206
1134	0	468	1	1	178,313253
1135	0	469	0	0	260
1136	0	469	1	0	222
1137	0	470	0	0	147,4025974
1138	0	471	0	0	116,6666667
1139	0	471	1	0	117,6470588
1140	0	471	4	0	232,967033
1141	0	472	0	1	152,2580645
1143	0	472	11	1	503,9215686
1144	0	472	13	1	686,7924528
1145	0	473	0	1	292,1875
1146	0	473	1	1	166,2983425
1147	0	473	3	1	155,1724138
1148	0	474	3	0	368,8073394
1149	0	474	5	0	341,8604651
1150	0	475	0	1	198,4848485
1151	0	476	0	0	359,6153846
1152	0	476	1	0	322,4137931
1153	0	477	0	1	383,6363636
1154	0	477	4	1	800
1155	0	477	6	1	890,9090909
1156	0	477	8	1	1065,714286
1157	0	477	10	1	720
1158	0	478	0	0	186,9047619
1159	0	478	1	0	206,4102564
1160	0	478	4	0	171,7391304
1161	0	479	0	0	151,1450382
1162	0	479	2	0	239,047619
1163	0	479	4	0	391,3461538
1164	0	479	7	0	263,8297872
1165	0	480	0	0	122,2222222
1166	0	480	1	0	109,8837209
1167	0	480	4	0	189,2857143
1168	0	480	6	0	245,9459459
1169	0	481	0	0	172,0930233
1170	0	482	0	0	144,3298969
1171	0	483	2	1	1071,698113
1172	0	484	0	0	275,3846154
1173	0	484	1	0	331,9148936
1174	0	485	0	0	278,2608696
1175	0	485	2	0	188,0597015
1176	0	485	5	0	461,8181818
1177	0	485	7	0	351,1627907
1178	0	485	9	0	332,5581395
1179	0	486	0	0	120,979021
1180	0	486	3	0	173,5294118
1181	0	487	0	1	258,2278481
1182	0	487	1	1	306,8181818
1183	0	487	3	1	345,8333333
1184	0	487	5	1	445,7142857
1185	0	488	0	1	540,7407407
1186	0	488	2	1	525
1187	0	488	4	1	545
1188	0	488	7	1	566,6666667
1189	0	489	0	0	277,6699029
1190	0	489	4	0	269,0789474
1191	0	490	4	0	275,4098361
1192	0	490	7	0	249,5412844
1193	0	491	1	1	460,7142857
1194	0	491	2	1	415,8730159
1195	0	491	3	1	520,6896552
1196	0	491	6	1	648,4848485
1197	0	491	8	1	578,4810127
1198	0	491	10	1	497,6744186
1199	0	492	0	0	221,0526316
1200	0	492	1	0	171,5328467
1201	0	493	0	0	243,2432432
1202	0	493	1	0	155,2447552
1203	0	494	0	0	292,4528302
1204	0	494	2	0	366,6666667
1205	0	494	3	0	414,1414141
1206	0	495	0	1	352,6315789
1207	0	495	2	1	514,2857143
1208	0	495	4	1	797,6190476
1209	0	495	6	1	750
1210	0	495	6	1	637,0967742
1211	0	495	7	1	636,9230769
1212	0	496	0	1	161,9834711
1213	0	496	1	1	127,5167785
1214	0	497	9	1	557,5471698
1215	0	497	12	1	565,7894737
1216	0	498	0	0	371,9101124
1217	0	498	1	0	347,9591837
1218	0	498	3	0	410,8910891
1219	0	498	5	0	488,7755102
1220	0	499	0	0	278,8235294
1221	0	500	0	1	131,6455696
1222	0	500	1	1	122,5806452
1223	0	500	2	1	175,3623188
1224	0	500	4	1	300
1225	0	500	7	1	234,4827586
1226	0	500	9	1	280,952381
1227	0	501	0	0	136,1344538
1228	0	501	4	0	201,7094017
1229	0	501	6	0	259,6638655
1230	0	501	8	0	310,8108108
1231	0	501	11	0	255,625
1232	0	502	0	0	177,9527559
1233	0	503	0	1	521,7391304
1234	0	503	1	1	458,3333333
1235	0	504	0	0	476,0869565
1236	0	504	13	0	450,862069
1237	0	504	15	0	637,6623377
1238	0	504	18	0	708,8235294
1239	0	505	0	0	296,2025316
1240	0	506	0	1	171,4285714
1241	0	506	2	1	273,1343284
1242	0	507	0	0	167,8571429
1243	0	507	7	0	378,2945736
1244	0	508	0	0	450
1245	0	509	0	0	190
1246	0	510	0	0	720,4545455
1247	0	510	2	0	692,3076923
1248	0	510	4	0	273,9130435
1249	0	510	7	0	285,4014599
1250	0	511	0	1	169,7674419
1251	0	511	1	1	242,3728814
1252	0	512	0	0	307,5268817
1253	0	512	1	0	394,5205479
1254	0	512	3	0	384,8484848
1255	0	512	5	0	591,7525773
1256	0	512	8	0	558,8235294
1257	0	512	12	0	386,6242038
1258	0	513	0	1	442,5531915
1259	0	513	1	1	149,2537313
1260	0	513	3	1	481,0810811
1261	0	514	0	1	536,9565217
1262	0	514	1	1	305,6179775
1263	0	514	3	1	384,3137255
1264	0	514	7	1	432,0987654
1265	0	514	10	1	571,1111111
1266	0	514	11	1	442,0168067
1267	0	514	14	1	327,388535
1268	0	514	16	1	379,7468354
1269	0	515	1	0	275,1937984
1270	0	515	4	0	341,5584416
1271	0	516	0	0	129,7709924
1272	0	516	1	0	118,6915888
1273	0	516	2	0	117,4496644
1274	0	516	4	0	157,7181208
1275	0	516	7	0	212,6506024
1276	0	517	0	0	154,6391753
1277	0	517	1	0	137,0689655
1278	0	517	3	0	300
1279	0	517	5	0	290,8045977
1280	0	517	9	0	279,0697674
1281	0	517	10	0
1282	0	518	0	1	287,2093023
1283	0	519	0	0	174,4525547
1284	0	519	4	0	548,7179487
1285	0	519	6	0	348,2758621
1286	0	519	8	0	186,0169492
1287	0	520	0	0	186,407767
1288	0	520	3	0	423,4375
1289	0	520	5	0	385,3932584
1290	0	520	8	0	331,2977099
1291	0	521	0	0	588,4615385
1292	0	522	0	0	388,4615385
1293	0	522	3	0	302,8571429
1294	0	523	0	0	177,3109244
1295	0	523	1	0	189,2156863
1296	0	524	0	1	277,7777778
1297	0	525	0	1	259,0909091
1298	0	525	1	1	294,2857143
1299	0	525	3	1	537,0967742
1300	0	526	0	0	178,0821918
1301	0	526	1	0	119,6261682
1302	0	527	0	0	93,86503067
1303	0	527	3	0	238,75
1304	0	527	4	0	178,7401575
1305	0	527	6	0	261,6666667
1306	0	527	8	0	329,8387097
1307	0	527	11	0	403,4722222
1308	0	528	0	1	234,8837209
1309	0	528	2	1	106,9444444
1310	0	529	0	0	158
1311	0	529	3	0	209,6153846
1312	0	529	6	0	364,1791045
1313	0	529	8	0	338,8349515
1314	0	529	13	0	276,3888889
1315	0	530	0	1	217,2131148
1316	0	530	2	1	262,0689655
1317	0	530	8	1	165,1898734
1318	0	531	0	0	272,1518987
1319	0	532	0	0	217,0068027
1320	0	533	0	0	167,2727273
1321	0	533	1	0	190,9090909
1322	0	533	4	0	265,8119658
1323	0	533	6	0	378,7878788
1324	0	534	0	1	226
1325	0	534	2	1	206,5217391
1326	0	534	4	1	223,255814
1327	0	534	5	1	267,5675676
1328	0	534	7	1	348,8372093
1329	0	535	0	1	248,3516484
1330	0	536	0	0	419,6969697
1331	0	536	2	0	521,5384615
1332	0	537	0	0	352,7272727
1333	0	537	2	0	244,7058824
1334	0	537	4	0	252,4271845
1335	0	537	7	0	223,0392157
1336	0	538	0	0	148,2517483
1337	0	539	0	0	261,5384615
1338	0	539	1	0	443,1372549
1339	0	539	3	0	352,7777778
1340	0	539	5	0	415,1898734
1341	0	540	0	0	718,4210526
1342	0	540	2	0	779,0697674
1343	0	540	4	0	355,1724138
1344	0	540	5	0	357,2519084
1345	0	541	0	1	88,69565217
1346	0	541	1	1	109,1954023
1347	0	542	0	0	246,4788732
1348	0	542	4	0	372,972973
1349	0	543	0	0	132,6086957
1350	0	544	0	0	255,5555556
1351	0	544	1	0	217,0212766
1352	0	544	3	0	200,862069
1353	0	544	4	0	333,3333333
1354	0	544	6	0	387,8787879
1355	0	545	0	0	187,5
1356	0	545	2	0	410,9375
1357	0	546	0	0	235,8208955
1358	0	547	0	1	302,7522936
1359	0	547	7	1	280,4195804
1360	0	547	7	1	294,0397351
1361	0	547	8	1	268,2080925
1362	0	547	9	1	255,3763441
1363	0	547	10	1	249,7607656
1364	0	547	11	1	188,9312977
1365	0	547	12	1	206,3492063
1366	0	547	13	1	218,1102362
1367	0	547	14	1	254,3859649
1368	0	547	15	1	278,817734
1369	0	547	16	1	242,0600858
1370	0	548	0	1	506,1728395
1371	0	548	2	0	521,0526316
1372	0	549	0	0	211,2676056
1373	0	549	5	0	386,6666667
1374	0	549	9	0	234,2105263
1375	0	549	13	0	448,2758621
1376	0	549	15	0	411,7647059
1377	0	549	16	0	448,5714286
1378	0	549	19	0	893,1034483
1379	0	550	0	0	228,4671533
1380	0	551	0	0	372,5
1381	0	551	2	0
1382	0	551	6	0	432,3529412
1383	0	551	9	0	310,3448276
1384	0	552	0	0	149,1666667
1385	0	552	5	0	165,1685393
1386	0	552	7	0	241,5584416
1387	0	552	8	0	342,3728814
1388	0	553	0	0	154,3209877
1389	0	553	2	0	126,3157895
1390	0	554	0	1	222,2222222
1391	0	554	4	1	435,483871
1392	0	554	5	1	319,4805195
1393	0	554	6	1	264,2276423
1394	0	554	7	1	260,5263158
1395	0	554	8	1	202,5157233
1396	0	554	9	1	180,2139037
1397	0	554	10	1	197,9695431
1398	0	554	11	1	216,5
1399	0	555	0	1	320,7792208
1400	0	555	3	1	370,9677419
1401	0	555	4	1	391,6666667
1402	0	555	5	1	331,7460317
1403	0	555	6	1	237,8881988
1404	0	555	7	1	297,5609756
1405	0	555	8	1	373,75
1406	0	555	9	1	409,2105263
1407	0	555	10	1	538,8888889
1408	0	555	11	1	484,0277778
1409	0	555	12	1	434,6590909
1410	0	556	0	1	152,5
1411	0	556	4	1	397,1014493
1412	0	556	5	1	407,2463768
1413	0	556	6	1	1128,571429
1414	0	556	7	1	863,6363636
1415	0	556	8	1	736,7346939
1416	0	556	9	1	859,6153846
1417	0	556	10	1	467,6470588
1418	0	556	11	1	562,1212121
1419	0	556	12	1	495,7746479
1420	0	556	13	1	419,266055
1421	0	557	0	1	123,3766234
1422	0	557	2	1	121,1111111
1423	0	558	0	1	135,7142857
1424	0	558	0	1	288,75
1425	0	558	1	1	158,8652482
1426	0	558	2	1	137,5
1427	0	558	3	1	180,8139535
1428	0	558	4	1	155,5102041
1429	0	558	4	1	191,0313901
1430	0	558	5	1	230,7692308
1431	0	558	6	1	231,0344828
1432	0	558	7	1	195,6692913
1433	0	558	8	1
1434	0	559	0	1	157,4257426
1435	0	559	0	1	152,0408163
1436	0	559	2	1	193,0693069
1437	0	559	2	1	285,3658537
1438	0	559	3	1	143,8202247
1439	0	559	4	1	158,9403974
1440	0	559	5	1	271,5909091
1441	0	559	6	1	294
1442	0	559	7	1	344,4444444
1443	0	559	8	1	284,5238095
1444	0	559	9	1
1445	0	560	0	1	1083,783784
1446	0	560	1	1	638,5964912
1447	0	560	2	1	683,3333333
1448	0	560	3	1	581,8181818
1449	0	560	4	1	579,6296296
1450	0	560	5	1	344,5783133
1451	0	560	6	1	251,8867925
1452	0	560	7	1	262,5
1453	0	560	8	1	233,3333333
1454	0	560	9	1	321,4285714
1455	0	560	10	1	207,7669903
1456	0	561	0	0	154,8387097
1457	0	561	1	0	93,75
1458	0	561	2	0	113,9784946
1459	0	561	7	0	132,5123153
1460	0	562	0	0	301,6666667
1461	0	562	3	0	209,0909091
1462	0	563	0	0	229,7619048
1463	0	563	1	0	142,7419355
1464	0	563	2	0	154,9180328
1465	0	564	0	0	192,7272727
1466	0	564	5	0	446,1538462
1467	0	564	7	0	363,6363636
1468	0	565	0	0	158,7628866
1469	0	565	2	0	193,1818182
1470	0	565	4	0	146,5240642
1471	0	565	7	0	311,7241379
1472	0	566	0	1	314,0350877
1473	0	566	2	1	337,5
1474	0	566	4	1	330,8411215
1475	0	566	5	1	292,6229508
1476	0	566	5	1	205,1546392
1477	0	566	5	1	179,7979798
1478	0	566	6	1	206,4102564
1479	0	566	7	1	206,4516129
1480	0	566	10	1	250,877193
1481	0	566	11	1	320
1482	0	567	0	1	710,8108108
1483	0	567	4	1	296,9230769
1484	0	567	5	1	281,1594203
1485	0	567	6	1	336,7088608
1486	0	567	7	1	470,4918033
1487	0	567	8	1	497,4025974
1488	0	567	9	1	605,7142857
1489	0	567	10	1	551,0638298
1490	0	567	11	1	468,4684685
1491	0	567	12	1	408,6330935
1492	0	567	13	1	445,8646617
1493	0	568	0	0
1494	0	568	1	0	75,96153846
1495	0	569	0	0	105,1094891
1496	0	569	1	0	124,1071429
1497	0	569	1	0	76,52173913
1498	0	570	0	0	123,566879
1499	0	570	1	0	166,9354839
1500	0	570	3	0	187,804878
1501	0	571	0	0	170,2380952
1502	0	571	1	0	111,0169492
1503	0	571	2	0	143
1504	0	571	3	0	157,4257426
1505	0	572	0	1	450
1506	0	572	1	1	186,0465116
1507	0	573	4	1	448,9361702
1508	0	574	2	0	476,4705882
1509	0	574	4	0	957,1428571
1510	0	574	6	0	1337,5
1511	0	574	11	0	1958,823529
1512	0	574	13	0	1622,222222
1513	0	574	15	0	2106,25
1514	0	574	17	0	1558,333333
1515	0	575	4	0	524,2424242
1516	0	576	13	0	189,4009217
1517	0	577	5	1	278,3018868
1518	0	577	7	1	385,7142857
1519	0	577	10	1	236,3636364
1520	0	578	4	0	362,3762376
1521	0	579	5	0	188,2352941
1522	0	579	9	0	193,3333333
1523	0	579	11	0	237,8640777
1524	0	579	13	0	203,9370079
1525	0	579	16	0	204,8951049
1526	0	580	0	1	135,3448276
1527	0	580	5	1	281,0126582
1528	0	581	2	1	227,6315789
1529	0	581	4	1	283,8235294
1530	0	581	7	1	369,2307692
1531	0	581	9	1	487,804878
1532	0	581	11	1	686,6666667
1533	0	581	14	1	554,1666667
1534	0	582	1	1	185,915493
1535	0	582	3	1	292,4242424
1536	0	582	4	1	201,2987013
1537	0	582	6	1	318,75
1538	0	582	8	1	292,1568627
1539	0	583	1	1	169,5652174
1540	0	583	2	1	317,3076923
1541	0	583	3	1	337,037037
1542	0	583	5	1	291,1111111
1543	0	583	8	1	572,4137931
1544	0	583	10	1	646,031746
1545	0	583	10	1	357,1428571
1546	0	583	12	1	530,1369863
1547	0	583	15	1	803,4482759
1548	0	584	1	0	195,9459459
1549	0	584	6	0	238,3838384
1550	0	584	9	0	213,5714286
1551	0	584	13	0	141,6666667
1552	0	585	1	0	154,7619048
1553	0	585	3	0	204,6511628
1554	0	585	5	0	188,5245902
1555	0	586	0	0	95,85492228
1556	0	586	2	0	129,6774194
1557	0	587	0	1	179,6296296
1558	0	587	2	1	331,0344828
1559	0	587	4	1	406,0606061
1560	0	587	5	1	424,2424242
1561	0	587	7	1	340,9090909
1562	0	587	9	1	503,8461538
1563	0	587	12	1	389,2857143
1564	0	588	1	0	398,5294118
1565	0	588	3	0	357,5471698
1566	0	589	1	0	285,3333333
1567	0	589	3	0	367,1052632
1568	0	590	1	0	189,2857143
1569	0	590	2	0	233,6956522
1570	0	590	5	0	215,3846154
1571	0	590	7	0	237,3493976
1572	0	591	0	0	147,6635514
1573	0	591	1	0	154,7169811
1574	0	591	2	0	239,2857143
1575	0	591	4	0	209,9236641
1576	0	592	0	0	229,4117647
1577	0	592	5	0	481,5789474
1578	0	592	7	0	628,5714286
1579	0	592	9	0	669,5652174
1580	0	592	11	0	736
1581	0	593	0	0	187,704918
1582	0	593	3	0	182,6923077
1583	0	594	1	1	124
1584	0	594	2	1	125,974026
1585	0	594	5	1	224,6376812
1586	0	594	5	1	210
1587	0	594	7	1	337,5
1588	0	594	9	1	194,2028986
1589	0	594	12	1	72,09302326
1590	0	595	0	0	128,2051282
1591	0	595	2	0	187,3786408
1592	0	596	0	0	436,1111111
1593	0	596	8	0	775,862069
1594	0	596	9	0	562,1621622
1595	0	597	0	1	195,3703704
1596	0	597	2	1	317,9487179
1597	0	598	0	0	273,1707317
1598	0	598	2	0	336,7088608
1599	0	599	0	0	573,1343284
1600	0	599	1	0	646,5517241
1601	0	599	2	0	597,3333333
1602	0	599	4	0	725,6756757
1603	0	599	6	0	649,5145631
1604	0	599	8	0	537,037037
1605	0	599	9	0	525,3846154
1606	0	599	11	0	443,2432432
1607	0	600	0	0	517,0731707
1608	0	600	1	0	629,4117647
1609	0	600	3	0	323,880597
1610	0	601	0	0	278,8461538
1611	0	601	2	0	362,5
1612	0	601	4	0	292,8571429
1613	0	602	1	0	357,7464789
1614	0	602	3	0	491,0714286
1615	0	602	4	0	624,5283019
1616	0	602	6	0	320,7792208
1617	0	602	8	0	246,9135802
1618	0	602	10	0	167,2566372
1619	0	603	2	1	135,8974359
1620	0	603	4	1	156,3636364
1621	0	603	6	1	294,047619
1622	0	603	7	1	712,5
1623	0	603	8	1	457,1428571
1624	0	603	9	1	291
1625	0	603	10	1	381,1111111
1626	0	603	11	1	307,9646018
1627	0	604	0	1	380,6451613
1628	0	604	3	1	364,6341463
1629	0	604	5	1	304,1237113
1630	0	604	7	1	379,0697674
1631	0	605	1	1
1632	0	605	4	1	163,9534884
1633	0	605	7	1	441,6666667
1634	0	605	9	1	537,5
1635	0	606	1	0	426,5306122
1636	0	606	2	0	534,2857143
1637	0	607	0	0	335
1638	0	607	1	0	315,7894737
1639	0	607	2	0	258,5714286
1640	0	607	4	0	308,2191781
1641	0	607	6	0	323,5294118
1642	0	607	8	0	261,9047619
1643	0	608	0	1	392,8571429
1644	0	608	2	1	464,2857143
1645	0	608	4	1	929,6296296
1646	0	609	0	1	303,7037037
1647	0	609	1	1	176,9230769
1648	0	609	3	1	153,8461538
1649	0	609	5	1	169,5652174
1650	0	609	5	1	153,968254
1651	0	610	0	1	156,779661
1652	0	610	2	1	197
1653	0	610	4	1	344,3181818
1654	0	610	5	1	592,3076923
1655	0	610	7	1	320,4301075
1656	0	610	10	1	120,8333333
1657	0	611	0	0	171,4285714
1658	0	611	2	0	216,3636364
1659	0	612	0	0	207,6923077
1660	0	612	2	0	329,3103448
1661	0	612	4	0	484,7457627
1662	0	613	0	1	639,2857143
1663	0	613	1	1	1860
1664	0	613	6	1	2308,333333
1665	0	613	9	1	954,5454545
1666	0	614	0	0	202,238806
1667	0	614	8	0	519,205298
1668	0	614	10	0	632,4074074
1669	0	614	12	0	518,5483871
1670	0	614	14	0	687,5
1671	0	614	16	0	435,5932203
1672	0	614	18	0	674,025974
1673	0	615	1	0	251,5625
1674	0	615	2	0	303,2258065
1675	0	615	4	0	450
1676	0	616	1	1	90,3030303
1677	0	616	3	1	119,53125
1678	0	616	4	1	129,1970803
1679	0	616	6	1	144,5255474
1680	0	617	0	1	201,2195122
1681	0	617	1	1	105,7553957
1682	0	617	3	1	253,125
1683	0	617	5	1	265,8823529
1684	0	618	2	0	722,2222222
1685	0	618	4	0	669,8113208
1686	0	618	6	0	637,8787879
1687	0	618	8	0	421,3592233
1688	0	619	2	0	468,852459
1689	0	619	4	0	650,7936508
1690	0	620	3	1	1246,153846
1691	0	620	3	1	1131,034483
1692	0	620	5	1	967,8571429
1693	0	620	8	1	903,5714286
1694	0	621	2	1	344,0677966
1695	0	622	0	0	400
1696	0	622	5	0	736,2318841
1697	0	623	0	0	335,1851852
1698	0	623	2	0	409,6774194
1699	0	623	4	0	166,25
1700	0	623	6	0	281,9672131
1701	0	624	0	1	728,5714286
1702	0	624	1	1	495,9183673
1703	0	624	3	1	318,8235294
1704	0	625	0	1	185,7142857
1705	0	625	2	1	129,3103448
1706	0	625	3	1	89,47368421
1707	0	625	4	1	130,7692308
1708	0	625	7	1	127,3684211
1710	0	627	0	0	120
1711	0	627	1	0
1712	0	627	3	0	102,1276596
1713	0	627	5	0	236,3636364
1714	0	628	0	0	325,862069
1715	0	628	1	0	330,3030303
1716	0	628	3	0	535,0877193
1717	0	629	0	0	200
1718	0	629	1	0	224,137931
1719	0	629	5	0	358,2278481
1720	0	630	0	0	332
1721	0	630	1	0	525
1722	0	630	3	0	579,0123457
1723	0	631	0	0	92,06349206
1724	0	631	2	0	173,381295
1725	0	631	4	0	173,5135135
1726	0	631	6	0	236,8983957
1727	0	632	0	0	143,2835821
1728	0	632	2	0	215,0684932
1729	0	632	4	0	433,3333333
1730	0	632	6	0	518,6440678
1731	0	633	0	0	280,8219178
1732	0	633	3	0	280,6818182
1733	0	633	5	0	368,1318681
1734	0	633	7	0	392,8571429
1735	0	634	0	1	223,0769231
1736	0	634	2	1	230,3797468
1737	0	634	5	1	322,0588235
1738	0	634	8	1	860
1739	0	635	0	0	118,0451128
1740	0	635	5	0	172,7941176
1741	0	635	6	0	288,6597938
1742	0	636	0	0	151,9230769
1743	0	636	1	0	238,0952381
1744	0	636	3	0	419,5121951
1745	0	636	5	0	391,8032787
1746	0	637	0	0	59,12863071
1747	0	637	2	0	77,68240343
1748	0	637	4	0	76,6192733
1749	0	638	0	0	247,2222222
1750	0	638	2	0	295,3703704
1751	0	639	0	0	105,4263566
1752	0	639	1	0	151,4563107
1753	0	639	3	0	133,3333333
1754	0	640	0	1	153,4653465
1755	0	640	2	1	220,9090909
1756	0	640	6	1	551,3888889
1757	0	640	8	1	314,5251397
1758	0	641	0	1	381,443299
1759	0	641	1	1	510,8695652
1760	0	642	0	0	171,7171717
1761	0	642	5	0	98,67549669
1762	0	642	7	0	147,9674797
1763	0	643	0	0	617,6470588
1764	0	643	1	0	582,3529412
1765	0	643	3	0	620,8333333
1766	0	643	5	0	521,875
1767	0	643	7	0	409,8360656
1768	0	644	0	0	212,5786164
1769	0	644	1	0	111,1111111
1770	0	645	0	0	233,3333333
1771	0	645	9	0	338,0952381
1772	0	645	13	0	497,5
1773	0	646	0	1	277,7777778
1774	0	646	2	1	595,5555556
1775	0	646	6	1	254,9019608
1776	0	647	0	1	73,33333333
1777	0	647	2	1	163,9344262
1778	0	648	0	0	130,7692308
1779	0	649	0	0	190,3614458
1780	0	649	1	0	292,5925926
1781	0	649	3	0	300
1782	0	649	6	0	752,5
1783	0	650	2	1	102,1052632
1784	0	651	10	0	162,2047244
1785	0	651	13	0	145,631068
1786	0	651	16	0	218,1818182
1787	0	652	0	0	171,2121212
1788	0	652	2	0	308,3333333
1789	0	652	3	0	505,1282051
1790	0	652	5	0	548
1791	0	653	0	1	315,2173913
1792	0	653	2	1	260,6060606
1793	0	653	5	1	439,3939394
1794	0	654	0	0	355,7692308
1795	0	654	2	0	272,972973
1796	0	655	0	0	267,5324675
1797	0	655	2	0	196,1538462
1798	0	656	0	0	134,3373494
1799	0	656	2	0	165,6934307
1800	0	656	3	0	172,5
1801	0	657	0	0	302,2727273
1802	0	657	2	0	450
1803	0	658	0	0	166,1016949
1804	0	658	1	0	188,8888889
1805	0	658	3	0	368,2926829
1806	0	658	5	0	423,0769231
1807	0	659	0	1	123,943662
1808	0	659	4	1	121,875
1809	0	660	0	0	297,7272727
1810	0	660	2	0	294,7826087
1811	0	661	0	0	354,6666667
1812	0	661	2	0	440,2985075
1813	0	662	0	0	402,1276596
1814	0	662	1	0	322,8070175
1815	0	662	3	0	454,2372881
1816	0	663	0	1	157,7142857
1817	0	663	2	1	267,7165354
1818	0	663	4	1	324,7619048
1819	0	664	0	0	218,0851064
1820	0	664	2	0	264,8648649
1821	0	665	0	0	228,7878788
1822	0	665	1	0	235,1851852
1823	0	665	2	0	243,8356164
1824	0	665	4	0	372,7272727
1825	0	665	5	0	591,1764706
1826	0	666	0	1	755,8823529
1827	0	666	2	1	1106,25
1828	0	666	4	1
1829	0	666	6	1	251,5151515
1830	0	667	0	0	340,7407407
1831	0	668	5	1	269,8630137
1832	0	669	4	0	576,0869565
1833	0	670	0	0	313
1834	0	670	3	0	491,1392405
1835	0	671	0	0	219,1304348
1836	0	672	0	1	234,6666667
1837	0	672	1	1	233,3333333
1838	0	672	3	1	471,1111111
1839	0	673	0	0	125,6637168
1840	0	673	3	0	144,2622951
1841	0	674	0	1	233,6956522
1842	0	674	3	1	326,8292683
1843	0	675	0	0	396,1538462
1844	0	676	0	1	60
1845	0	676	1	1	55,85585586
1846	0	676	3	1	48,7804878
1847	0	677	0	1	100,625
1848	0	677	2	1	142,8571429
1849	0	677	4	1	126,8115942
1850	0	678	0	1	236,6071429
1851	0	678	1	1	482,4561404
1852	0	678	3	1	336
1853	0	679	0	0	141,9117647
1854	0	679	2	0	116,5714286
1855	0	680	0	0	582,0512821
1856	0	680	2	0	470,7692308
1857	0	681	0	0	202,4096386
1858	0	681	2	0	175,78125
1859	0	682	0	0	300
1860	0	682	1	0	454,1666667
1861	0	682	3	0	362,0155039
1862	0	683	0	0	217,1717172
1863	0	683	5	0	215,1898734
1864	0	683	6	0	198,8505747
1865	0	683	7	0	188,6138614
1866	0	684	0	0	542,8571429
1867	0	684	3	0	660
1868	0	685	0	1	348,0519481
1869	0	685	1	1	410,4477612
1870	0	685	3	1	523,5294118
1871	0	686	0	1	173,7588652
1872	0	686	1	1	158,4745763
1873	0	686	2	1	230,1204819
1874	0	686	4	1	254,7945205
1875	0	687	0	1	551,3043478
1876	0	687	3	1	483,0357143
1877	0	688	0	0	170,7692308
1878	0	688	1	0	156,3380282
1879	0	689	1	0	317,0212766
1880	0	689	3	0	270
1881	0	690	0	1	293,2432432
1882	0	690	2	1	256,4102564
1883	0	691	1	0	141,8300654
1884	0	691	2	0	235,6435644
1885	0	692	0	0	152,8169014
1886	0	692	2	0	307,5949367
1887	0	693	0	1	191,8699187
1888	0	693	3	1	402,5
1889	0	694	0	0	125,2336449
1890	0	694	1	0	145,4545455
1891	0	694	3	0	125,0996016
1892	0	695	3	1	452,7777778
1893	0	695	4	1	275
1894	0	695	5	1	191,3461538
1895	0	695	6	1	114,9253731
1896	0	695	7	1	154,7619048
1897	0	696	3	1	454,3478261
1898	0	696	3	1	449,0909091
1899	0	696	3	1	311,1111111
1900	0	696	3	1	490,2912621
1901	0	696	20	1	334,5679012
1902	0	696	21	1	306,4705882
1903	0	696	22	1	281,6326531
1904	0	696	23	1	291,5662651
1905	0	696	24	1	312,345679
1906	0	697	2	0
1907	0	697	3	0
1908	0	698	20	1	110,3448276
1909	0	698	21	1	74,6031746
1910	0	698	22	1	112
1911	0	698	23	1	101,8518519
1912	0	698	24	1	91,73553719
1913	0	698	25	1	106,185567
1914	0	698	26	1	94,69026549
1916	0	700	0	0	147,8873239
1928	0	703	2	1	298,3606557
1929	0	703	3	1	322,8813559
1930	0	703	4	1	384,4262295
1931	0	703	5	1	434,0206186
1932	0	703	6	1	455,4545455
1933	0	703	7	1	393,0434783
1934	0	703	8	1	307,9710145
1935	0	704	2	1	182,3529412
1936	0	704	3	1	198,3739837
1937	0	704	4	1	194,1605839
1938	0	704	5	1	210,4166667
1939	0	704	6	1	186,1386139
1940	0	704	7	1	216,0493827
1941	0	704	8	1	164,0776699
1942	0	705	1	1	454,9295775
1943	0	705	3	1	437,5838926
1944	0	705	4	1	454,5454545
1945	0	705	5	1	410,9289617
1946	0	705	6	1	503,5928144
1947	0	706	5	0
1948	0	707	3	0	159,1549296
1949	0	707	5	0
1950	0	708	0	0	252,9411765
1951	0	709	0	1	617,6470588
1952	0	709	1	1	541,6666667
1953	0	709	2	1	374,0740741
1954	0	709	3	1	511,1111111
1955	0	709	4	1	455,2631579
1956	0	710	1	1	252,6785714
1957	0	710	1	1	343,373494
1958	0	710	2	1	456,1403509
1959	0	710	4	1	475,5102041
1960	0	711	3	1	395,7446809
1961	0	711	3	1	295,5555556
1962	0	711	4	1	277,7777778
1963	0	712	0	1	355
1964	0	712	1	1	273,2283465
1965	0	712	2	1	376,5217391
1966	0	712	3	1	550
1967	0	712	4	1	442,4657534
1968	0	713	0	0	181,5217391
1969	0	714	3	0	166,2921348
1970	0	715	1	0	188,0681818
1971	0	716	3	0	110,5882353
1972	0	717	0	1	264,9484536
1973	0	717	0	1	400
1974	0	717	1	1	387,0967742
1975	0	717	2	1	294,1860465
1976	0	718	0	1	241,9047619
1977	0	718	1	1	311,4583333
1978	0	718	2	1	233,6134454
1979	0	719	0	0	194,7368421
1980	0	720	0	0	266,6666667
1981	0	721	0	1	267,2839506
1982	0	721	1	1	229,8429319
1983	0	722	0	0	252,7472527
1984	0	723	0	1	343,75
1985	0	723	1	1	294,0298507
1986	0	724	1	1	375
1987	0	724	1	1	372,5806452
1988	0	725	0	1	198,5714286
1989	0	726	0	1	152
1991	0	728	0	0	196,3414634
1992	0	729	0	1	90,03831418
1993	0	729	0	1	100,8474576
1994	0	730	0	1	389,0625
1995	0	730	1	1	312,987013
1996	0	730	2	1	289,5833333
1997	0	730	3	1	372,1518987
1998	0	730	4	1	460
1999	0	731	1	0	170,0934579
2000	0	732	0	0	306,7567568
2001	0	733	0	1	122,9166667
2002	0	734	0	0	158,4269663
2003	0	735	4	1	372,3404255
2004	0	735	4	1	335,4545455
2005	0	735	5	1	137,804878
2006	0	735	6	1	260,7142857
2007	0	735	7	1	324,0506329
2008	0	735	8	1	391,8032787
2009	0	735	9	1	312,0879121
2010	0	736	0	0	158,7412587
2011	0	737	0	1	473,8095238
2012	0	737	1	1	314,9122807
2013	0	737	2	1	358,4158416
2014	0	738	0	0	224,2105263
2015	0	739	2	1
2016	0	739	4	1
2017	0	740	1	0	203,5714286
2018	0	740	2	0	206,4220183
[truncated: 589 more rows]
