# Supplementary material for: A novel haemocytometric COVID-19 prognostic score developed and validated in an observational multicentre European hospital-based study
Source: eLife journal article supplement (doi:10.7554/elife.63195), 2020-11-26
Supplement: supp [file elife-63195-supp-v1.zip › elife_poa_e63195_Figure_8_source_data_1.csv]

Figure 8 – source data file 1. Source data for development cohort prognostic score 14-day hospitalisation time horizon (day of admission plus the first 13 days thereafter) comparing non-critical (NC) and critical/fatal (CF) groups
Filename	exclusion	length_of_hospitalisation	Critical_or_Fatal	Riskscore complete
1	0	0	1	1
2	0	2	1	0
3	0	2	1	2
4	0	3	1	4
5	0	4	1	4
6	0	15	1	0
7	0	0	0	1
8	0	1	0	0
9	0	2	0	1
10	0	3	0	1
11	0	4	0	1
12	0	6	0	1
13	0	0	1	3
14	0	1	1	2
15	0	1	1	7
16	0	2	1	9
17	0	3	1	6
18	0	4	1	8
19	0	4	1	7
20	0	5	1	4
21	0	6	1	6
22	0	7	1	8
23	0	8	1	4
24	0	9	1	6
25	0	10	1	4
26	0	11	1	3
27	0	12	1	2
28	0	13	1	1
29	0	0	1	3
30	0	1	1	8
31	0	1	1	8
32	0	2	1	2
33	0	3	1	5
34	0	4	1	9
35	0	5	1	12
36	0	6	1	12
37	0	7	1	10
38	0	8	1	20
39	0	9	1	17
40	0	10	1	14
41	0	10	1	15
42	0	11	1	12
43	0	12	1	6
44	0	13	1	5
45	0	14	1	5
46	0	0	0	2
47	0	1	0	1
48	0	0	0	0
49	0	2	0	3
50	0	3	0	0
51	0	5	0	3
52	0	0	0	0
53	0	2	0	3
54	0	3	0	3
55	0	4	0	0
56	0	5	0	0
57	0	6	0	0
58	0	1	0
59	0	0	0	1
