# Supplementary material for: A novel haemocytometric COVID-19 prognostic score developed and validated in an observational multicentre European hospital-based study
Source: eLife journal article supplement (doi:10.7554/elife.63195), 2020-11-26
Supplement: supp [file elife-63195-supp-v1.zip › elife_poa_e63195_Figure_8_source_data_3.csv]

Figure 8 – source data file 3. Source data for ROC curves to assess the capability of prediction of critical/fatal disease progression of the prognostic score
and platelet count, lymphocyte count, NLR and PLR
Filename	exclusion	length_of_hospitalisation	Critical_or_Fatal	Riskscore complete	PLT(10^3/uL)	LYMPH#(10^3/uL)	N/L ratio	PLT/LYMPH ratio
1	0	0	1	1	137	2.44	1.135245902	56.14754098
2	0	2	1	0	118	1.45	2.131034483	81.37931034
3	0	2	1	2	111	1.16	3.439655172	95.68965517
4	0	3	1	4	120	1	4.74	120
5	0	4	1	4	164	1.16	2.344827586	141.3793103
6	0	15	1	0	339	1.48	4.128378378	229.0540541
7	0	0	0	1	231	0.97	6.412371134	238.1443299
8	0	1	0	0	344	1.41	2.709219858	243.9716312
9	0	2	0	1	423	1.28	3.2265625	330.46875
10	0	3	0	1	482	1.75	2.274285714	275.4285714
11	0	4	0	1	550	2.11	1.582938389	260.6635071
12	0	6	0	1	648	2.11	1.848341232	307.1090047
13	0	0	1	3	147	0.74	5.445945946	198.6486486
14	0	1	1	2	155	1.05	2.676190476	147.6190476
15	0	1	1	7	144	0.37	7.72972973	389.1891892
16	0	2	1	9	192	0.75	7.786666667	256
17	0	3	1	6	214	1.04	5.057692308	205.7692308
18	0	4	1	8	222	0.67	4.955223881	331.3432836
19	0	4	1	7	216	0.62	4.967741935	348.3870968
20	0	5	1	4	227	0.72	5.152777778	315.2777778
21	0	6	1	6	240	1.05	3.638095238	228.5714286
22	0	7	1	8	200	0.93	3.032258065	215.0537634
23	0	8	1	4	253	1.11	2.126126126	227.9279279
24	0	9	1	6	367	1.57	1.993630573	233.7579618
25	0	10	1	4	453	1.44	2.611111111	314.5833333
26	0	11	1	3	491	1.41	2.056737589	348.2269504
27	0	12	1	2	525	1.01	3.089108911	519.8019802
28	0	13	1	1	655	1.24	2.903225806	528.2258065
29	0	0	1	3	160	0.71	8.366197183	225.3521127
30	0	1	1	8	166	0.21	52.33333333	790.4761905
31	0	1	1	8	173	0.36	36.05555556	480.5555556
32	0	2	1	2	145	0.4	14.675	362.5
33	0	3	1	5	175	0.15	54.73333333	1166.666667
34	0	4	1	9	172	0.16	65.1875	1075
35	0	5	1	12	156	0.1	132.5	1560
36	0	6	1	12	87	0.29	21.13793103	300
37	0	7	1	10	131	0.41	32.6097561	319.5121951
38	0	8	1	20	96	0.41	20.46341463	234.1463415
39	0	9	1	17	117	0.72	16.09722222	162.5
40	0	10	1	14	109	0.97	12.96907216	112.371134
41	0	10	1	15	111	1.05	10.79047619	105.7142857
42	0	11	1	12	125	1.5	11.1	83.33333333
43	0	12	1	6	35	1.08	10.87037037	32.40740741
44	0	13	1	5	56	0.9	13.58888889	62.22222222
45	0	14	1	5	134	1.53	8.078431373	87.58169935
46	0	0	0	2	192	0.58	13.96551724	331.0344828
47	0	1	0	1	173	0.5	15.88	346
48	0	0	0	0	280	0.71	4.985915493	394.3661972
49	0	2	0	3	293	0.58	5.568965517	505.1724138
50	0	3	0	0	322	0.7	4.214285714	460
51	0	5	0	3	470	0.78	4.487179487	602.5641026
52	0	0	0	0	185	1.3	3.2	142.3076923
53	0	2	0	3	206	1.89	1.111111111	108.994709
54	0	3	0	3	252	1.84	0.809782609	136.9565217
55	0	4	0	0	286	1.73	0.751445087	165.3179191
56	0	5	0	0	314	1.71	0.695906433	183.625731
57	0	6	0	0	320	1.68	0.976190476	190.4761905
58	0	1	0		158	1.58	0.85443038	100
59	0	0	0	1	225	0.5	10.54	450
