# Supplementary material for: A novel haemocytometric COVID-19 prognostic score developed and validated in an observational multicentre European hospital-based study
Source: eLife journal article supplement (doi:10.7554/elife.63195), 2020-11-26
Supplement: supp [file elife-63195-supp-v1.zip › elife_poa_e63195_Figure_11_source_data_1.csv]

Figure 12 – source data file 1. Source data for haemocytometric COVID-19 prognostic score prediction of clinical severity in the validation cohort
over 14-day hospitalisation time horizon comparing non-critical (NC) and critical/fatal (CF) groups
File Name	exclusion	Length_of_hospitalization	Critical_or_fatal	Riskscore_compleate
1	0	0	0	BLANK
2	0	0	1	BLANK
3	0	4	1	BLANK
4	0	6	1	BLANK
5	0	8	1	BLANK
6	0	8	1	2
7	0	9	1	BLANK
8	0	9	1	1
9	0	0	0	BLANK
10	0	2	0	BLANK
11	0	6	0	BLANK
12	0	0	0	BLANK
13	0	0	1	BLANK
14	0	2	1	10
15	0	3	1	9
16	0	4	1	7
17	0	5	1	9
18	0	6	1	8
19	0	7	1	9
20	0	9	1	8
21	0	10	1	7
22	0	11	1	5
23	0	12	1	4
24	0	13	1	1
25	0	13	1	BLANK
26	0	2	1	BLANK
27	0	3	1	BLANK
28	0	6	1	BLANK
29	0	6	1	12
30	0	7	1	BLANK
31	0	7	1	8
32	0	8	1	BLANK
33	0	9	1	BLANK
34	0	9	1	4
35	0	10	1	BLANK
36	0	0	0	BLANK
37	0	3	0	BLANK
38	0	4	0	BLANK
39	0	6	0	BLANK
40	0	0	1	BLANK
41	0	0	1	BLANK
42	0	1	1	3
43	0	2	1	6
44	0	3	1	6
45	0	4	1	5
46	0	5	1	BLANK
47	0	0	0	BLANK
48	0	3	0	BLANK
49	0	0	0	BLANK
50	0	0	0	BLANK
51	0	0	1	BLANK
52	0	2	1	BLANK
53	0	3	1	BLANK
54	0	4	1	BLANK
55	0	5	1	BLANK
56	0	6	1	BLANK
57	0	7	1	BLANK
58	0	7	1	0
59	0	8	1	BLANK
60	0	9	1	BLANK
61	0	10	1	BLANK
62	0	11	1	BLANK
63	0	11	1	1
64	0	12	1	BLANK
65	0	13	1	2
66	0	0	0	BLANK
67	0	0	0	11
68	0	11	0	BLANK
69	0	0	0	BLANK
70	0	0	0	BLANK
71	0	0	0	BLANK
72	0	0	0	BLANK
73	0	0	0	BLANK
74	0	0	1	BLANK
75	0	0	1	BLANK
76	0	0	0	BLANK
77	0	0	0	BLANK
78	0	0	1	BLANK
79	0	13	1	BLANK
80	0	0	0	BLANK
81	0	0	0	BLANK
82	0	2	0	BLANK
83	0	0	1	BLANK
84	0	0	1	BLANK
85	0	0	1	BLANK
86	0	0	1	BLANK
87	0	1	1	11
88	0	1	1	11
89	0	2	1	15
90	0	2	1	BLANK
91	0	2	1	15
92	0	3	1	15
93	0	4	1	16
94	0	0	0	BLANK
95	0	3	0	BLANK
96	0	0	0	BLANK
97	0	2	0	BLANK
98	0	0	0	BLANK
99	0	0	0	5
100	0	0	1	BLANK
101	0	8	1	BLANK
102	0	0	0	BLANK
103	0	0	0	BLANK
104	0	0	1	BLANK
105	0	0	1	7
106	0	1	1	4
107	0	0	0	BLANK
108	0	2	0	BLANK
109	0	0	0	BLANK
110	0	2	0	BLANK
111	0	4	0	BLANK
112	0	7	0	BLANK
113	0	0	0	BLANK
114	0	0	0	BLANK
115	0	6	0	BLANK
116	0	8	0	BLANK
117	0	1	0	BLANK
118	0	2	0	BLANK
119	0	0	1	BLANK
120	0	0	1	BLANK
121	0	0	1	BLANK
122	0	0	0	BLANK
123	0	0	0	BLANK
124	0	2	0	BLANK
125	0	0	1	BLANK
126	0	1	1	5
127	0	2	1	6
128	0	3	1	14
129	0	4	1	9
130	0	5	1	9
131	0	6	1	7
132	0	7	1	5
133	0	8	1	6
134	0	9	1	6
135	0	10	1	4
136	0	11	1	9
137	0	12	1	7
138	0	13	1	5
139	0	0	1	BLANK
140	0	0	1	BLANK
141	0	1	1	4
142	0	2	1	4
143	0	3	1	5
144	0	4	1	2
145	0	5	1	3
146	0	6	1	2
147	0	7	1	1
148	0	0	0	BLANK
149	0	0	0	BLANK
150	0	8	0	BLANK
151	0	0	1	BLANK
152	0	0	0	BLANK
153	0	2	0	BLANK
154	0	2	0	BLANK
155	0	0	0	BLANK
156	0	5	0	BLANK
157	0	0	0	BLANK
158	0	0	0	BLANK
159	0	4	0	BLANK
160	0	0	0	BLANK
161	0	0	0	BLANK
162	0	2	0	BLANK
163	0	3	0	BLANK
164	0	3	1	BLANK
165	0	4	1	5
166	0	5	1	6
167	0	6	1	11
168	0	7	1	6
169	0	8	1	8
170	0	9	1	3
171	0	10	1	7
172	0	11	1	9
173	0	12	1	4
174	0	13	1	4
175	0	0	0	BLANK
176	0	0	0	1
177	0	0	0	BLANK
178	0	3	0	BLANK
179	0	0	0	BLANK
180	0	0	0	BLANK
181	0	0	0	BLANK
182	0	2	0	BLANK
183	0	0	0	BLANK
184	0	0	0	BLANK
185	0	0	0	BLANK
186	0	0	0	BLANK
187	0	1	1	1
188	0	2	1	4
189	0	3	1	6
190	0	4	1	8
191	0	5	1	10
192	0	6	1	13
193	0	7	1	19
194	0	8	1	19
195	0	9	1	13
196	0	10	1	12
197	0	11	1	11
198	0	12	1	13
199	0	13	1	11
200	0	0	0	BLANK
201	0	0	0	BLANK
202	0	0	0	1
203	0	3	0	BLANK
204	0	3	0	3
205	0	0	0	BLANK
206	0	0	0	BLANK
207	0	3	0	BLANK
208	0	0	0	BLANK
209	0	0	1	BLANK
210	0	1	1	13
211	0	2	1	6
212	0	3	1	10
213	0	4	1	13
214	0	5	1	12
215	0	6	1	12
216	0	7	1	10
217	0	8	1	12
218	0	9	1	13
219	0	10	1	10
220	0	11	1	16
221	0	12	1	13
222	0	13	1	16
223	0	0	0	BLANK
224	0	3	0	BLANK
225	0	0	0	BLANK
226	0	2	0	BLANK
227	0	4	0	BLANK
228	0	0	0	BLANK
229	0	4	0	BLANK
230	0	0	1	BLANK
231	0	7	1	BLANK
232	0	0	1	BLANK
233	0	4	1	BLANK
234	0	4	1	7
235	0	0	0	BLANK
236	0	0	1	BLANK
237	0	0	1	BLANK
238	0	1	1	BLANK
239	0	1	1	BLANK
240	0	3	1	4
241	0	3	1	9
242	0	4	1	6
243	0	4	1	9
244	0	5	1	12
245	0	5	1	15
246	0	0	0	6
247	0	0	0	8
248	0	3	0	BLANK
249	0	5	0	BLANK
250	0	7	0	BLANK
251	0	0	0	BLANK
252	0	4	0	BLANK
253	0	5	0	BLANK
254	0	0	0	BLANK
255	0	0	0	BLANK
256	0	2	0	BLANK
257	0	2	0	1
258	0	0	0	BLANK
259	0	0	0	BLANK
260	0	2	0	BLANK
261	0	0	0	BLANK
262	0	0	1	BLANK
263	0	1	1	BLANK
264	0	2	1	BLANK
265	0	3	1	8
266	0	4	1	11
267	0	5	1	11
268	0	0	1	BLANK
269	0	1	1	BLANK
270	0	0	1	BLANK
271	0	0	1	13
272	0	0	0	BLANK
273	0	2	0	BLANK
274	0	3	0	BLANK
275	0	10	0	BLANK
276	0	0	0	BLANK
277	0	0	0	BLANK
278	0	0	0	BLANK
279	0	0	0	BLANK
280	0	0	1	BLANK
281	0	0	1	BLANK
282	0	2	1	BLANK
283	0	3	1	BLANK
284	0	5	1	BLANK
285	0	0	0	BLANK
286	0	0	0	1
287	0	5	0	BLANK
288	0	0	1	BLANK
289	0	0	1	4
290	0	2	1	BLANK
291	0	2	1	8
292	0	3	1	BLANK
293	0	7	1	BLANK
294	0	0	1	BLANK
295	0	0	0	BLANK
296	0	0	1	BLANK
297	0	0	1	8
298	0	0	1	BLANK
299	0	0	1	14
300	0	1	1	13
301	0	2	1	13
302	0	3	1	12
303	0	4	1	11
304	0	5	1	12
305	0	6	1	9
306	0	7	1	13
307	0	8	1	12
308	0	9	1	11
309	0	10	1	9
310	0	11	1	7
311	0	12	1	7
312	0	13	1	6
313	0	0	1	BLANK
314	0	0	1	5
315	0	8	1	BLANK
316	0	8	1	BLANK
317	0	0	1	BLANK
318	0	0	1	BLANK
319	0	1	1	BLANK
320	0	1	1	10
321	0	2	1	BLANK
322	0	2	1	BLANK
323	0	4	1	BLANK
324	0	4	1	BLANK
325	0	0	0	BLANK
326	0	0	0	BLANK
327	0	2	0	BLANK
328	0	4	0	BLANK
329	0	6	0	BLANK
330	0	0	1	BLANK
331	0	3	1	BLANK
332	0	4	1	7
333	0	5	1	8
334	0	6	1	11
335	0	7	1	6
336	0	8	1	3
337	0	9	1	2
338	0	10	1	BLANK
339	0	0	1	BLANK
340	0	2	1	BLANK
341	0	0	0	BLANK
342	0	2	0	BLANK
343	0	4	0	BLANK
344	0	5	0	BLANK
345	0	0	1	BLANK
346	0	4	1	BLANK
347	0	4	1	4
348	0	0	1	BLANK
349	0	1	1	BLANK
350	0	1	1	BLANK
351	0	2	1	2
352	0	3	1	5
353	0	4	1	6
354	0	5	1	12
355	0	6	1	17
356	0	7	1	19
357	0	8	1	18
358	0	9	1	19
359	0	0	0	BLANK
360	0	0	0	BLANK
361	0	3	0	BLANK
362	0	0	0	BLANK
363	0	2	0	BLANK
364	0	0	0	BLANK
365	0	5	0	BLANK
366	0	0	0	BLANK
367	0	0	0	BLANK
368	0	4	0	BLANK
369	0	0	1	BLANK
370	0	0	1	BLANK
371	0	1	1	8
372	0	2	1	8
373	0	3	1	9
374	0	4	1	9
375	0	5	1	10
376	0	6	1	10
377	0	7	1	8
378	0	8	1	11
379	0	9	1	11
380	0	10	1	12
381	0	11	1	18
382	0	12	1	16
383	0	13	1	10
384	0	0	0	BLANK
385	0	0	1	BLANK
386	0	0	1	BLANK
387	0	1	1	BLANK
388	0	2	1	BLANK
389	0	3	1	BLANK
390	0	4	1	6
391	0	5	1	5
392	0	6	1	5
393	0	7	1	5
394	0	8	1	5
395	0	0	0	BLANK
396	0	8	0	BLANK
397	0	9	0	BLANK
398	0	9	0	2
399	0	0	1	BLANK
400	0	0	1	3
401	0	0	1	BLANK
402	0	1	1	BLANK
403	0	1	1	5
404	0	0	0	BLANK
405	0	0	0	BLANK
406	0	2	0	BLANK
407	0	0	1	3
408	0	1	1	5
409	0	2	1	2
410	0	3	1	10
411	0	4	1	7
412	0	5	1	4
413	0	6	1	7
414	0	7	1	3
415	0	8	1	3
416	0	9	1	2
417	0	10	1	2
418	0	0	0	BLANK
419	0	0	1	BLANK
420	0	0	0	BLANK
421	0	2	0	BLANK
422	0	10	0	BLANK
423	0	10	0	BLANK
424	0	12	0	BLANK
425	0	0	1	4
426	0	2	1	9
427	0	3	1	9
428	0	4	1	8
429	0	0	0	BLANK
430	0	0	0	BLANK
431	0	8	0	BLANK
432	0	8	0	0
433	0	10	0	BLANK
434	0	13	0	BLANK
435	0	0	0	BLANK
436	0	2	0	BLANK
437	0	0	0	BLANK
438	0	3	0	BLANK
439	0	0	0	BLANK
440	0	3	0	BLANK
441	0	3	0	0
442	0	4	0	BLANK
443	0	5	0	BLANK
444	0	5	0	0
445	0	10	0	BLANK
446	0	0	0	BLANK
447	0	8	0	BLANK
448	0	10	0	BLANK
449	0	0	0	BLANK
450	0	1	0	BLANK
451	0	1	0	BLANK
452	0	0	0	BLANK
453	0	0	0	BLANK
454	0	4	0	BLANK
455	0	0	0	BLANK
456	0	0	0	1
457	0	0	0	0
458	0	0	0	BLANK
459	0	0	0	BLANK
460	0	0	0	BLANK
461	0	0	1	BLANK
462	0	3	1	BLANK
463	0	4	1	BLANK
464	0	5	1	BLANK
465	0	6	1	BLANK
466	0	7	1	BLANK
467	0	8	1	BLANK
468	0	9	1	BLANK
469	0	11	1	BLANK
470	0	0	1	BLANK
471	0	0	0	BLANK
472	0	1	0	BLANK
473	0	0	0	BLANK
474	0	4	0	BLANK
475	0	4	0	1
476	0	0	0	BLANK
477	0	1	0	BLANK
478	0	1	0	BLANK
479	0	4	0	BLANK
485	0	0	1	BLANK
486	0	0	1	BLANK
487	0	1	1	BLANK
488	0	2	1	BLANK
489	0	3	1	BLANK
490	0	4	1	BLANK
491	0	5	1	14
492	0	6	1	13
493	0	7	1	15
494	0	0	0	BLANK
495	0	0	0	3
496	0	0	1	16
497	0	0	1	15
498	0	1	1	4
499	0	2	1	6
500	0	0	0	BLANK
501	0	2	0	BLANK
502	0	0	0	BLANK
503	0	0	0	0
504	0	5	0	BLANK
505	0	5	0	6
506	0	0	1	BLANK
507	0	2	1	8
508	0	3	1	7
509	0	4	1	8
510	0	5	1	8
511	0	6	1	17
512	0	7	1	13
513	0	8	1	12
514	0	9	1	12
515	0	10	1	BLANK
516	0	10	1	11
517	0	11	1	11
518	0	12	1	11
519	0	13	1	14
520	0	0	0	BLANK
521	0	0	0	BLANK
522	0	2	0	BLANK
523	0	0	1	BLANK
524	0	0	1	BLANK
525	0	1	1	BLANK
526	0	1	1	5
527	0	2	1	5
528	0	3	1	5
529	0	4	1	5
530	0	6	1	BLANK
531	0	6	1	5
532	0	0	1	BLANK
533	0	1	1	BLANK
534	0	2	1	BLANK
535	0	3	1	BLANK
536	0	4	1	BLANK
537	0	5	1	9
538	0	6	1	7
539	0	7	1	10
540	0	8	1	7
541	0	9	1	8
542	0	10	1	11
543	0	11	1	7
544	0	12	1	5
545	0	13	1	3
546	0	0	1	BLANK
547	0	0	1	2
548	0	1	1	BLANK
549	0	1	1	4
550	0	2	1	BLANK
551	0	2	1	2
552	0	3	1	BLANK
553	0	3	1	7
554	0	4	1	BLANK
555	0	4	1	7
556	0	5	1	BLANK
557	0	5	1	10
558	0	6	1	11
559	0	7	1	BLANK
560	0	7	1	7
561	0	8	1	6
562	0	9	1	9
563	0	10	1	4
564	0	11	1	9
565	0	12	1	9
566	0	13	1	8
567	0	0	1	BLANK
568	0	0	0	BLANK
569	0	2	0	BLANK
570	0	4	0	BLANK
571	0	8	0	BLANK
572	0	0	0	BLANK
573	0	1	0	BLANK
574	0	3	0	BLANK
575	0	0	0	BLANK
576	0	0	0	BLANK
577	0	2	0	BLANK
578	0	0	1	BLANK
579	0	0	1	BLANK
580	0	1	1	BLANK
581	0	3	1	BLANK
582	0	3	1	14
583	0	4	1	11
584	0	5	1	15
585	0	6	1	8
586	0	7	1	11
587	0	8	1	6
588	0	10	1	BLANK
589	0	12	1	BLANK
590	0	0	0	BLANK
591	0	0	0	BLANK
592	0	0	0	BLANK
593	0	0	0	BLANK
594	0	2	0	BLANK
595	0	2	1	BLANK
596	0	4	1	BLANK
597	0	0	1	BLANK
598	0	1	1	10
599	0	2	1	10
600	0	3	1	12
601	0	4	1	8
602	0	5	1	BLANK
603	0	6	1	BLANK
604	0	7	1	BLANK
605	0	9	1	8
606	0	10	1	8
607	0	11	1	9
608	0	12	1	6
609	0	13	1	8
610	0	0	0	BLANK
611	0	0	1	BLANK
612	0	2	1	2
613	0	2	1	2
614	0	3	1	2
615	0	4	1	3
616	0	4	1	3
617	0	5	1	2
618	0	6	1	2
619	0	7	1	3
620	0	8	1	4
621	0	9	1	3
622	0	10	1	2
623	0	11	1	1
624	0	12	1	2
625	0	13	1	2
626	0	0	0	BLANK
627	0	0	0	BLANK
628	0	0	1	BLANK
629	0	0	0	BLANK
630	0	0	0	BLANK
631	0	2	0	BLANK
632	0	0	1	BLANK
633	0	2	1	BLANK
634	0	5	1	BLANK
635	0	6	1	BLANK
636	0	7	1	BLANK
637	0	8	1	BLANK
638	0	8	1	11
639	0	0	0	BLANK
640	0	0	1	BLANK
641	0	2	1	BLANK
642	0	0	1	BLANK
643	0	1	1	BLANK
644	0	2	1	BLANK
645	0	2	1	5
646	0	3	1	BLANK
647	0	4	1	BLANK
648	0	5	1	BLANK
649	0	6	1	BLANK
650	0	7	1	BLANK
651	0	8	1	6
652	0	9	1	6
653	0	0	0	BLANK
654	0	0	1	BLANK
655	0	8	1	BLANK
656	0	8	1	7
657	0	0	0	BLANK
658	0	1	0	BLANK
659	0	0	0	BLANK
660	0	2	0	BLANK
661	0	0	0	BLANK
662	0	11	0	BLANK
663	0	0	0	BLANK
664	0	2	0	BLANK
665	0	1	1	BLANK
666	0	1	1	12
667	0	2	1	BLANK
668	0	5	1	BLANK
669	0	6	1	BLANK
670	0	7	1	BLANK
671	0	8	1	BLANK
672	0	9	1	BLANK
673	0	10	1	BLANK
674	0	13	1	BLANK
675	0	0	0	BLANK
676	0	0	0	BLANK
677	0	0	1	BLANK
678	0	0	0	BLANK
679	0	10	0	BLANK
680	0	0	0	BLANK
681	0	0	0	BLANK
682	0	0	0	BLANK
683	0	0	1	BLANK
684	0	0	0	BLANK
685	0	0	1	BLANK
686	0	8	0	BLANK
687	0	10	0	BLANK
688	0	0	0	BLANK
689	0	0	0	BLANK
690	0	0	0	BLANK
691	0	0	1	BLANK
692	0	0	1	BLANK
693	0	1	1	BLANK
694	0	4	1	BLANK
695	0	4	1	8
696	0	0	0	BLANK
697	0	0	1	BLANK
698	0	0	0	BLANK
699	0	2	0	BLANK
700	0	4	0	BLANK
701	0	4	0	BLANK
702	0	0	0	BLANK
703	0	4	0	BLANK
704	0	0	0	BLANK
705	0	1	0	BLANK
706	0	0	0	BLANK
707	0	4	0	BLANK
708	0	0	0	BLANK
709	0	0	0	BLANK
710	0	0	0	BLANK
711	0	0	1	BLANK
712	0	3	1	2
713	0	4	1	2
714	0	5	1	1
715	0	6	1	0
716	0	7	1	3
717	0	8	1	6
718	0	9	1	7
719	0	10	1	2
720	0	12	1	BLANK
721	0	0	1	BLANK
722	0	2	1	BLANK
723	0	5	1	8
724	0	6	1	5
725	0	7	1	10
726	0	11	1	BLANK
727	0	0	0	BLANK
728	0	0	1	BLANK
729	0	0	0	BLANK
730	0	0	0	BLANK
731	0	0	0	8
732	0	0	1	BLANK
733	0	2	1	3
734	0	4	1	3
735	0	5	1	1
736	0	6	1	1
737	0	7	1	0
738	0	0	0	BLANK
739	0	0	1	BLANK
740	0	3	1	BLANK
741	0	0	1	BLANK
742	0	0	1	7
743	0	1	1	5
744	0	2	1	8
745	0	3	1	5
746	0	4	1	7
747	0	5	1	12
748	0	6	1	10
749	0	0	1	BLANK
750	0	0	1	BLANK
751	0	0	0	BLANK
752	0	2	0	BLANK
753	0	0	1	BLANK
754	0	5	1	BLANK
755	0	0	0	BLANK
756	0	4	0	BLANK
757	0	6	0	BLANK
758	0	7	0	BLANK
759	0	0	0	BLANK
760	0	0	1	BLANK
761	0	2	1	BLANK
762	0	6	1	10
763	0	7	1	5
764	0	0	0	BLANK
765	0	2	0	BLANK
766	0	0	0	BLANK
767	0	0	0	BLANK
768	0	0	0	4
769	0	0	0	BLANK
770	0	0	1	BLANK
771	0	1	1	BLANK
772	0	2	1	4
773	0	3	1	6
774	0	4	1	5
775	0	0	0	BLANK
776	0	0	1	BLANK
777	0	0	1	BLANK
778	0	1	1	BLANK
779	0	2	1	16
780	0	0	0	BLANK
781	0	0	0	1
782	0	2	0	BLANK
783	0	2	0	4
784	0	0	1	BLANK
785	0	0	1	BLANK
786	0	7	1	BLANK
787	0	7	1	10
788	0	0	1	BLANK
789	0	2	1	4
790	0	3	1	5
791	0	4	1	BLANK
792	0	4	1	4
793	0	5	1	BLANK
794	0	5	1	4
795	0	6	1	BLANK
796	0	6	1	6
797	0	8	1	7
798	0	9	1	4
799	0	10	1	9
800	0	11	1	7
801	0	12	1	10
802	0	13	1	10
803	0	0	0	BLANK
804	0	0	0	BLANK
805	0	0	1	BLANK
806	0	2	1	BLANK
807	0	0	0	BLANK
808	0	0	0	BLANK
809	0	2	0	BLANK
810	0	0	1	BLANK
811	0	1	1	4
812	0	2	1	5
813	0	3	1	5
814	0	4	1	4
815	0	5	1	4
816	0	6	1	4
817	0	7	1	8
818	0	8	1	4
819	0	12	1	BLANK
820	0	13	1	BLANK
821	0	0	0	BLANK
822	0	0	0	BLANK
823	0	7	0	BLANK
824	0	0	0	BLANK
825	0	0	1	BLANK
826	0	2	1	BLANK
827	0	2	1	1
828	0	4	1	BLANK
829	0	4	1	1
830	0	6	1	BLANK
831	0	6	1	1
832	0	0	0	BLANK
833	0	3	0	BLANK
834	0	0	0	BLANK
835	0	0	1	BLANK
836	0	0	1	BLANK
837	0	1	1	2
838	0	2	1	4
839	0	3	1	4
840	0	4	1	6
841	0	5	1	8
842	0	6	1	15
843	0	7	1	8
844	0	8	1	6
845	0	9	1	6
846	0	10	1	7
847	0	11	1	BLANK
848	0	12	1	BLANK
849	0	13	1	12
850	0	0	1	BLANK
851	0	7	1	BLANK
852	0	13	1	BLANK
853	0	13	1	BLANK
854	0	0	0	BLANK
855	0	2	0	BLANK
856	0	0	0	BLANK
857	0	0	0	BLANK
858	0	4	1	BLANK
859	0	5	1	4
860	0	6	1	7
861	0	13	1	BLANK
862	0	7	1	4
863	0	8	1	5
864	0	9	1	8
865	0	10	1	5
866	0	11	1	3
867	0	12	1	4
868	0	13	1	1
869	0	13	1	1
870	0	3	0	BLANK
871	0	4	1	7
872	0	5	1	10
873	0	6	1	12
874	0	7	1	14
875	0	8	1	18
876	0	9	1	18
877	0	10	1	18
878	0	11	1	17
879	0	12	1	13
880	0	13	1	13
881	0	0	1	BLANK
882	0	1	1	2
883	0	2	1	3
884	0	3	1	BLANK
885	0	0	1	BLANK
886	0	3	1	9
887	0	4	1	8
888	0	5	1	10
889	0	6	1	5
890	0	7	1	4
891	0	13	1	10
892	0	0	1	BLANK
893	0	3	1	BLANK
894	0	4	1	BLANK
895	0	4	1	13
896	0	5	1	BLANK
897	0	5	1	14
898	0	6	1	16
899	0	7	1	11
900	0	8	1	10
901	0	9	1	13
902	0	10	1	12
903	0	0	0	BLANK
904	0	3	0	BLANK
905	0	0	1	BLANK
906	0	0	1	BLANK
907	0	1	1	2
908	0	2	1	2
909	0	3	1	4
910	0	4	1	2
911	0	5	1	5
912	0	0	1	BLANK
913	0	2	1	BLANK
914	0	4	1	14
915	0	0	1	BLANK
916	0	2	1	7
917	0	3	1	3
918	0	4	1	1
919	0	5	1	2
920	0	6	1	BLANK
921	0	7	1	1
922	0	8	1	2
923	0	9	1	3
924	0	10	1	BLANK
925	0	10	1	2
926	0	10	1	BLANK
927	0	11	1	1
928	0	12	1	2
929	0	12	1	BLANK
930	0	13	1	2
931	0	0	0	BLANK
932	0	0	0	BLANK
933	0	0	1	BLANK
934	0	0	1	BLANK
935	0	2	1	BLANK
936	0	3	1	4
937	0	5	1	BLANK
938	0	6	1	9
939	0	7	1	BLANK
940	0	8	1	6
941	0	8	1	5
942	0	9	1	7
943	0	10	1	4
944	0	11	1	1
945	0	12	1	6
946	0	13	1	8
947	0	0	1	5
948	0	4	1	9
949	0	5	1	13
950	0	6	1	10
951	0	7	1	11
952	0	8	1	13
953	0	9	1	14
954	0	10	1	16
955	0	11	1	17
956	0	12	1	17
957	0	13	1	15
958	0	0	0	BLANK
959	0	1	0	BLANK
960	0	0	0	BLANK
961	0	0	0	BLANK
962	0	0	1	BLANK
963	0	0	1	BLANK
964	0	1	1	BLANK
965	0	2	1	7
966	0	3	1	9
967	0	4	1	9
968	0	5	1	5
969	0	6	1	5
970	0	7	1	5
971	0	8	1	9
972	0	9	1	5
973	0	9	1	5
974	0	10	1	9
975	0	11	1	4
976	0	12	1	8
977	0	13	1	7
978	0	0	1	BLANK
979	0	0	0	BLANK
980	0	0	1	BLANK
981	0	1	1	BLANK
982	0	2	1	BLANK
983	0	0	1	7
984	0	4	1	7
985	0	5	1	8
986	0	6	1	10
987	0	7	1	6
988	0	8	1	10
989	0	0	0	BLANK
990	0	0	0	2
991	0	1	0	BLANK
992	0	2	0	BLANK
993	0	4	0	BLANK
994	0	6	0	BLANK
995	0	7	0	BLANK
996	0	0	1	BLANK
997	0	0	0	BLANK
998	0	2	0	BLANK
999	0	9	0	BLANK
1000	0	0	0	BLANK
1001	0	0	0	BLANK
1002	0	0	0	BLANK
1003	0	6	0	BLANK
1004	0	0	0	BLANK
1005	0	0	0	BLANK
1006	0	0	0	BLANK
1007	0	0	1	BLANK
1008	0	3	1	BLANK
1009	0	0	0	BLANK
1010	0	0	0	BLANK
1011	0	0	0	0
1012	0	0	0	BLANK
1013	0	0	0	BLANK
1014	0	0	1	BLANK
1015	0	0	0	BLANK
1016	0	1	0	BLANK
1017	0	11	0	BLANK
1018	0	0	0	BLANK
1019	0	0	1	BLANK
1020	0	1	1	BLANK
1021	0	3	1	BLANK
1022	0	4	1	6
1023	0	5	1	11
1024	0	6	1	17
1025	0	7	1	10
1026	0	8	1	17
1027	0	9	1	18
1028	0	10	1	8
1029	0	10	1	7
1030	0	11	1	8
1031	0	0	0	BLANK
1032	0	0	0	BLANK
1033	0	0	1	BLANK
1034	0	1	1	3
1035	0	2	1	1
1036	0	3	1	0
1037	0	4	1	0
1038	0	5	1	0
1039	0	6	1	BLANK
1040	0	0	0	BLANK
1041	0	0	0	BLANK
1042	0	0	0	BLANK
1043	0	0	0	BLANK
1044	0	1	0	BLANK
1045	0	0	0	BLANK
1046	0	0	0	BLANK
1047	0	0	0	BLANK
1048	0	0	0	BLANK
1049	0	0	1	BLANK
1050	0	0	1	10
1051	0	0	1	7
1052	0	0	0	BLANK
1053	0	2	0	BLANK
1054	0	0	0	BLANK
1055	0	0	1	BLANK
1056	0	0	1	BLANK
1057	0	0	1	BLANK
1058	0	5	1	BLANK
1059	0	0	0	BLANK
1060	0	0	0	BLANK
1061	0	7	0	BLANK
1062	0	0	0	BLANK
1063	0	1	0	BLANK
1064	0	3	0	BLANK
1065	0	0	0	BLANK
1066	0	0	0	BLANK
1067	0	3	0	BLANK
1068	0	0	0	BLANK
1069	0	0	0	BLANK
1070	0	2	0	BLANK
1071	0	0	0	BLANK
1072	0	0	1	BLANK
1073	0	1	1	0
1074	0	2	1	1
1075	0	3	1	2
1076	0	4	1	5
1077	0	5	1	9
1078	0	6	1	11
1079	0	7	1	14
1080	0	8	1	7
1081	0	9	1	6
1082	0	9	1	4
1083	0	10	1	8
1084	0	11	1	10
1085	0	12	1	5
1086	0	12	1	5
1087	0	13	1	6
1088	0	13	1	5
1089	0	0	1	BLANK
1090	0	4	1	8
1091	0	8	1	BLANK
1092	0	11	1	9
1093	0	0	1	BLANK
1094	0	6	1	18
1095	0	7	1	11
1096	0	8	1	8
1097	0	9	1	10
1098	0	10	1	8
1099	0	11	1	10
1100	0	12	1	BLANK
1101	0	12	1	8
1102	0	13	1	6
1103	0	0	1	BLANK
1104	0	3	1	BLANK
1105	0	5	1	4
1106	0	6	1	4
1107	0	7	1	3
1108	0	8	1	3
1109	0	9	1	6
1110	0	10	1	3
1111	0	11	1	3
1112	0	12	1	4
1113	0	0	0	BLANK
1114	0	0	0	BLANK
1115	0	5	0	BLANK
1116	0	0	0	BLANK
1117	0	2	0	BLANK
1118	0	3	0	BLANK
1119	0	0	1	BLANK
1120	0	1	1	BLANK
1121	0	2	1	10
1122	0	5	1	BLANK
1123	0	6	1	15
1124	0	7	1	17
1125	0	0	1	BLANK
1126	0	0	1	BLANK
1127	0	0	0	BLANK
1128	0	0	0	BLANK
1129	0	5	0	BLANK
1130	0	0	0	BLANK
1131	0	0	0	BLANK
1132	0	1	0	BLANK
1133	0	5	0	BLANK
1134	0	5	0	BLANK
1135	0	0	0	BLANK
1136	0	2	0	BLANK
1137	0	0	0	BLANK
1138	0	0	1	BLANK
1139	0	2	1	2
1140	0	3	1	1
1141	0	4	1	4
1142	0	5	1	4
1143	0	6	1	6
1144	0	7	1	4
1145	0	8	1	3
1146	0	9	1	6
1147	0	10	1	6
1148	0	11	1	9
1149	0	12	1	9
1150	0	13	1	7
1151	0	1	1	BLANK
1152	0	2	1	BLANK
1153	0	4	1	BLANK
1154	0	6	1	BLANK
1155	0	11	1	BLANK
1156	0	0	0	BLANK
1157	0	0	0	BLANK
1158	0	3	0	BLANK
1159	0	0	0	BLANK
1160	0	0	0	BLANK
1161	0	0	0	BLANK
1162	0	2	0	BLANK
1163	0	4	0	BLANK
1164	0	0	1	BLANK
1165	0	5	1	5
1166	0	6	1	0
1167	0	7	1	0
1168	0	8	1	2
1169	0	0	0	4
1170	0	0	0	BLANK
1171	0	2	0	BLANK
1172	0	0	1	BLANK
1173	0	5	1	7
1174	0	6	1	11
1175	0	7	1	BLANK
1176	0	8	1	5
1177	0	9	1	4
1178	0	10	1	7
1179	0	11	1	7
1180	0	12	1	7
1181	0	12	1	7
1182	0	13	1	6
1183	0	0	1	BLANK
1184	0	4	1	BLANK
1185	0	7	1	18
1186	0	8	1	17
1187	0	9	1	15
1188	0	9	1	13
1189	0	10	1	14
1190	0	10	1	15
1191	0	0	0	BLANK
1192	0	7	0	BLANK
1193	0	0	0	BLANK
1194	0	0	0	BLANK
1195	0	0	0	BLANK
1196	0	10	0	BLANK
1197	0	11	0	BLANK
1198	0	0	0	BLANK
1199	0	0	1	BLANK
1200	0	7	1	BLANK
1201	0	7	1	BLANK
1202	0	8	1	6
1203	0	10	1	5
1204	0	10	1	BLANK
1205	0	11	1	2
1206	0	12	1	4
1207	0	13	1	6
1208	0	0	1	BLANK
1209	0	0	0	BLANK
1210	0	0	1	BLANK
1211	0	0	0	4
1212	0	2	0	1
1213	0	4	0	0
1214	0	0	1	BLANK
1215	0	2	1	9
1216	0	3	1	7
1217	0	4	1	5
1218	0	5	1	5
1219	0	6	1	6
1220	0	7	1	9
1221	0	8	1	7
1222	0	9	1	4
1223	0	10	1	11
1224	0	11	1	11
1225	0	12	1	9
1226	0	13	1	10
1227	0	0	0	BLANK
1228	0	0	1	BLANK
1229	0	0	1	BLANK
1230	0	7	1	BLANK
1231	0	10	1	BLANK
1232	0	0	1	BLANK
1233	0	5	1	BLANK
1234	0	8	1	8
1235	0	9	1	8
1236	0	10	1	5
1237	0	11	1	4
1238	0	1	0	BLANK
1239	0	0	0	BLANK
1240	0	0	0	BLANK
1241	0	8	0	BLANK
1242	0	0	1	BLANK
1243	0	1	1	BLANK
1244	0	4	1	2
1245	0	4	1	8
1246	0	5	1	6
1247	0	5	1	5
1248	0	6	1	5
1249	0	6	1	9
1250	0	7	1	5
1251	0	7	1	5
1252	0	0	0	BLANK
1253	0	0	0	BLANK
1254	0	2	0	BLANK
1255	0	4	0	BLANK
1256	0	5	0	BLANK
1257	0	0	1	BLANK
1258	0	0	0	BLANK
1259	0	0	0	BLANK
1260	0	0	0	BLANK
1261	0	0	1	BLANK
1262	0	3	1	7
1263	0	4	1	7
1264	0	5	1	5
1265	0	6	1	1
1266	0	7	1	0
1267	0	8	1	4
1268	0	9	1	3
1269	0	10	1	3
1270	0	10	1	3
1271	0	11	1	4
1272	0	12	1	2
1273	0	13	1	7
1274	0	0	1	BLANK
1275	0	1	1	BLANK
1276	0	1	1	BLANK
1277	0	0	0	BLANK
1278	0	6	0	1
1279	0	0	1	BLANK
1280	0	1	1	BLANK
1281	0	2	1	7
1282	0	3	1	BLANK
1283	0	4	1	BLANK
1284	0	4	1	10
1285	0	5	1	8
1286	0	6	1	BLANK
1287	0	7	1	6
1288	0	8	1	6
1289	0	0	0	BLANK
1290	0	2	0	BLANK
1291	0	0	0	BLANK
1292	0	1	0	BLANK
1293	0	0	0	BLANK
1294	0	0	0	BLANK
1295	0	8	0	BLANK
1296	0	0	1	BLANK
1297	0	0	0	BLANK
1298	0	0	1	6
1299	0	2	1	6
1300	0	3	1	10
1301	0	3	1	7
1302	0	4	1	4
1303	0	5	1	9
1304	0	6	1	5
1305	0	7	1	5
1306	0	8	1	6
1307	0	9	1	6
1308	0	10	1	6
1309	0	10	1	6
1310	0	11	1	6
1311	0	12	1	6
1312	0	13	1	7
1313	0	0	0	BLANK
1314	0	0	0	BLANK
1315	0	0	0	BLANK
1316	0	0	0	BLANK
1317	0	0	0	BLANK
1318	0	0	0	BLANK
1319	0	0	1	BLANK
1320	0	2	1	BLANK
1321	0	0	1	BLANK
1322	0	6	1	BLANK
1323	0	9	1	BLANK
1324	0	9	1	4
1325	0	0	0	BLANK
1326	0	5	0	BLANK
1327	0	7	0	BLANK
1328	0	0	0	BLANK
1329	0	0	1	BLANK
1330	0	1	1	BLANK
1331	0	5	1	BLANK
1332	0	5	1	9
1333	0	8	1	8
1334	0	9	1	13
1335	0	10	1	12
1336	0	10	1	14
1337	0	11	1	17
1338	0	12	1	7
1339	0	13	1	8
1340	0	0	0	BLANK
1341	0	1	0	BLANK
1342	0	0	0	BLANK
1343	0	0	0	BLANK
1344	0	0	0	BLANK
1345	0	0	0	BLANK
1346	0	0	0	BLANK
1347	0	0	0	BLANK
1348	0	0	0	BLANK
1349	0	0	0	BLANK
1350	0	2	0	BLANK
1351	0	0	1	BLANK
1352	0	0	1	BLANK
1353	0	1	1	8
1354	0	2	1	10
1355	0	3	1	11
1356	0	4	1	19
1357	0	5	1	20
1358	0	6	1	16
1359	0	7	1	16
1360	0	8	1	13
1361	0	9	1	12
1362	0	10	1	13
1363	0	11	1	8
1364	0	12	1	8
1365	0	13	1	14
1366	0	0	0	BLANK
1367	0	0	0	BLANK
1368	0	1	0	2
1369	0	0	0	BLANK
1370	0	3	0	BLANK
1371	0	0	1	BLANK
1372	0	1	1	BLANK
1373	0	2	1	10
1374	0	3	1	9
1375	0	4	1	BLANK
1376	0	5	1	BLANK
1377	0	0	0	BLANK
1378	0	7	0	BLANK
1379	0	0	0	BLANK
1380	0	0	0	0
1381	0	0	0	BLANK
1382	0	0	1	BLANK
1383	0	0	0	BLANK
1384	0	0	1	11
1385	0	1	1	11
1386	0	2	1	10
1387	0	3	1	9
1388	0	4	1	6
1389	0	0	0	BLANK
1390	0	0	0	BLANK
1391	0	0	0	BLANK
1392	0	0	0	BLANK
1393	0	1	0	9
1394	0	4	0	BLANK
1395	0	0	0	BLANK
1396	0	0	1	BLANK
1397	0	4	1	BLANK
1398	0	0	1	BLANK
1399	0	0	0	BLANK
1400	0	2	0	BLANK
1401	0	0	0	BLANK
1402	0	2	0	BLANK
1403	0	0	0	BLANK
1404	0	0	0	BLANK
1405	0	0	0	BLANK
1406	0	2	1	BLANK
1407	0	4	1	BLANK
1408	0	6	1	7
1409	0	0	0	BLANK
1410	0	0	0	1
1411	0	0	1	BLANK
1412	0	3	1	BLANK
1413	0	7	1	BLANK
1414	0	2	0	0
1415	0	3	0	0
1416	0	9	0	3
1417	0	1	1	0
1418	0	1	1	0
1419	0	7	0	2
1420	0	11	1	2
1421	0	6	0	7
1422	0	3	0	0
1423	0	1	1	2
1424	0	2	0	0
1425	0	2	0	1
1426	0	5	0	3
1427	0	13	0	0
1428	0	13	0	4
1429	0	1	1	2
1430	0	3	0	0
1431	0	3	0	1
1432	0	11	1	7
1433	0	10	0	0
1434	0	6	0	2
1435	0	4	0	4
1436	0	5	0	0
1437	0	5	0	0
1438	0	5	0	5
1439	0	5	0	6
1440	0	3	0	0
1441	0	1	0	0
1442	0	1	0	5
1443	0	4	0	4
1444	0	1	1	8
1445	0	1	1	0
1446	0	1	1	2
1447	0	1	1	1
1448	0	3	1	5
1449	0	5	0	4
1450	0	12	1	4
1451	0	12	0	0
1452	0	13	0	1
1453	0	13	0	7
1454	0	1	0	0
1455	0	7	0	6
1456	0	1	1	2
1457	0	1	1	6
1458	0	5	0	6
1459	0	4	0	5
1460	0	4	0	1
1461	0	1	1	5
1462	0	4	0	5
1463	0	1	1	7
1464	0	6	0	0
1465	0	1	1	2
1466	0	2	1	0
1467	0	1	1	6
1468	0	1	1	10
1469	0	4	0	0
1470	0	8	0	2
1471	0	1	1	1
1472	0	1	1	2
1473	0	1	1	4
1474	0	1	1	4
1475	0	1	0	3
1476	0	1	0	13
1477	0	9	0	4
1478	0	6	0	1
1479	0	5	0	1
1480	0	6	0	4
1481	0	1	1	5
1482	0	3	0	1
1483	0	1	1	3
1484	0	1	1	8
1485	0	3	0	2
1486	0	6	0	1
1487	0	4	0	5
1488	0	1	0	1
1489	0	2	0	2
1490	0	12	0	0
1491	0	1	1	7
1492	0	2	0	2
1493	0	3	0	1
1494	0	1	1	1
1495	0	1	1	8
1496	0	1	1	1
1497	0	1	0	3
1498	0	1	1	7
1499	0	1	0	6
1500	0	13	0	5
1501	0	5	0	2
1502	0	6	0	3
1503	0	6	0	1
1504	0	5	0	0
1505	0	8	0	0
1506	0	8	0	6
1507	0	8	0	5
1508	0	1	1	4
1509	0	1	1	0
1510	0	6	1	5
1511	0	1	1	2
1512	0	3	0	2
1513	0	3	0	0
1514	0	6	0	0
1515	0	1	1	6
1516	0	9	1	4
1517	0	1	0	1
1518	0	3	0	1
