# Supplementary material for: A novel haemocytometric COVID-19 prognostic score developed and validated in an observational multicentre European hospital-based study
Source: eLife journal article supplement (doi:10.7554/elife.63195), 2020-11-26
Supplement: supp [file elife-63195-supp-v1.zip › elife_poa_e63195_Figure_11_source_data_2.csv]

Figure 11 – source data file 2. Source data for ROC curve comparisons of prognostic score and NLR over 14 days
File Name	exclusion	Length_of_hospitalization	Critical_or_fatal	NLR	Riskscore_complete
1	0	0	0	4.061643836	BLANK
2	0	0	1	6	BLANK
3	0	4	1	9.77	BLANK
4	0	6	1	11.12676056	BLANK
5	0	8	1	4.961538462	BLANK
6	0	8	1	4.9	2
7	0	9	1	4.261146497	BLANK
8	0	9	1	4.310126582	1
9	0	0	0	13.42105263	BLANK
10	0	2	0	19.93333333	BLANK
11	0	6	0	12.37681159	BLANK
12	0	0	0	4.026548673	BLANK
13	0	0	1	12.9787234	BLANK
14	0	2	1	25.17741935	10
15	0	3	1	12.69512195	9
16	0	4	1	6.72173913	7
17	0	5	1	8.120879121	9
18	0	6	1	7.149122807	8
19	0	7	1	6.711711712	9
20	0	9	1	6.826666667	8
21	0	10	1	10.47904192	7
22	0	11	1	9.678571429	5
23	0	12	1	7.762162162	4
24	0	13	1	6.790322581	1
25	0	13	1	6.88172043	BLANK
26	0	2	1	23.70967742	BLANK
27	0	3	1	19.35897436	BLANK
28	0	6	1	58.45	BLANK
29	0	6	1	56.38095238	12
30	0	7	1	18.89583333	BLANK
31	0	7	1	16.5	8
32	0	8	1	18.5	BLANK
33	0	9	1	13.67924528	BLANK
34	0	9	1	12.18644068	4
35	0	10	1	11.57142857	BLANK
36	0	0	0	15.55172414	BLANK
37	0	3	0	11.98809524	BLANK
38	0	4	0	6.963302752	BLANK
39	0	6	0	5.16	BLANK
40	0	0	1	5.898305085	BLANK
41	0	0	1	5.8125	BLANK
42	0	1	1	6.488095238	3
43	0	2	1	12.94354839	6
44	0	3	1	9.912280702	6
45	0	4	1	8.018348624	5
46	0	5	1	3.544444444	BLANK
47	0	0	0	3.953271028	BLANK
48	0	3	0	7.681318681	BLANK
49	0	0	0	7.011363636	BLANK
50	0	0	0	2.792307692	BLANK
51	0	0	1	2.650793651	BLANK
52	0	2	1	5.933333333	BLANK
53	0	3	1	6.045454545	BLANK
54	0	4	1	8.255319149	BLANK
55	0	5	1	12.68	BLANK
56	0	6	1	7.556962025	BLANK
57	0	7	1	6	BLANK
58	0	7	1	6.21978022	0
59	0	8	1	9.378378378	BLANK
60	0	9	1	10.91666667	BLANK
61	0	10	1	11.5375	BLANK
62	0	11	1	6.598591549	BLANK
63	0	11	1	6.581560284	1
64	0	12	1	3.663793103	BLANK
65	0	13	1	3.141414141	2
66	0	0	0	4.60625	BLANK
67	0	0	0	4.759493671	11
68	0	11	0	2.357541899	BLANK
69	0	0	0	16.6	BLANK
70	0	0	0	3.774509804	BLANK
71	0	0	0	11.56338028	BLANK
72	0	0	0	6.39	BLANK
73	0	0	0	2.582089552	BLANK
74	0	0	1	29.74418605	BLANK
75	0	0	1	12.12820513	BLANK
76	0	0	0	7.486842105	BLANK
77	0	0	0	3.583333333	BLANK
78	0	0	1	8.192307692	BLANK
79	0	13	1	6.258992806	BLANK
80	0	0	0	2.053811659	BLANK
81	0	0	0	9.515151515	BLANK
82	0	2	0	3.58490566	BLANK
83	0	0	1	8.588888889	BLANK
84	0	0	1	9.201183432	BLANK
85	0	0	1	9.293814433	BLANK
86	0	0	1	8.795121951	BLANK
87	0	1	1	16.30136986	11
88	0	1	1	15.80519481	11
89	0	2	1	19.37931034	15
90	0	2	1	28.10526316	BLANK
91	0	2	1	34.03125	15
92	0	3	1	19.15789474	15
93	0	4	1	15.09722222	16
94	0	0	0	2.473333333	BLANK
95	0	3	0	4.647540984	BLANK
96	0	0	0	11.36470588	BLANK
97	0	2	0	3.476190476	BLANK
98	0	0	0	9.658536585	BLANK
99	0	0	0	10.14102564	5
100	0	0	1	32.10638298	BLANK
101	0	8	1	19.42241379	BLANK
102	0	0	0	5.97029703	BLANK
103	0	0	0	9.315789474	BLANK
104	0	0	1	5.783625731	BLANK
105	0	0	1	7.505050505	7
106	0	1	1	4.273333333	4
107	0	0	0	14.44155844	BLANK
108	0	2	0	17.42222222	BLANK
109	0	0	0	13.18	BLANK
110	0	2	0	11.18367347	BLANK
111	0	4	0	17.41304348	BLANK
112	0	7	0	8.666666667	BLANK
113	0	0	0	4.431372549	BLANK
114	0	0	0	2.114942529	BLANK
115	0	6	0	1.631386861	BLANK
116	0	8	0	1.733333333	BLANK
117	0	1	0	3.988764045	BLANK
118	0	2	0	2.105590062	BLANK
119	0	0	1	6.606837607	BLANK
120	0	0	1	1.984693878	BLANK
121	0	0	1	9.793103448	BLANK
122	0	0	0	21.79310345	BLANK
123	0	0	0	10.35365854	BLANK
124	0	2	0	6.786516854	BLANK
125	0	0	1	16.20930233	BLANK
126	0	1	1	10.38709677	5
127	0	2	1	8.266666667	6
128	0	3	1	19.69565217	14
129	0	4	1	20.41666667	9
130	0	5	1	15.18055556	9
131	0	6	1	8.075	7
132	0	7	1	10.68131868	5
133	0	8	1	14.59701493	6
134	0	9	1	15.35483871	6
135	0	10	1	12.78217822	4
136	0	11	1	34.34482759	9
137	0	12	1	17.85555556	7
138	0	13	1	11.5	5
139	0	0	1	7.294573643	BLANK
140	0	0	1	11.54347826	BLANK
141	0	1	1	4.164835165	4
142	0	2	1	6.518248175	4
143	0	3	1	4.664335664	5
144	0	4	1	5.151898734	2
145	0	5	1	5.304635762	3
146	0	6	1	4.333333333	2
147	0	7	1	4.335616438	1
148	0	0	0	3.056074766	BLANK
149	0	0	0	3.093023256	BLANK
150	0	8	0	8.151898734	BLANK
151	0	0	1	25.94594595	BLANK
152	0	0	0	3.415584416	BLANK
153	0	2	0	3.064102564	BLANK
154	0	2	0	3.25974026	BLANK
155	0	0	0	5.024691358	BLANK
156	0	5	0	2.45323741	BLANK
157	0	0	0	3.755555556	BLANK
158	0	0	0	6.471698113	BLANK
159	0	4	0	5.441176471	BLANK
160	0	0	0	7.62295082	BLANK
161	0	0	0	4.242038217	BLANK
162	0	2	0	12.08641975	BLANK
163	0	3	0	18.90909091	BLANK
164	0	3	1	21.64864865	BLANK
165	0	4	1	8.022727273	5
166	0	5	1	11.05882353	6
167	0	6	1	12.44871795	11
168	0	7	1	6.931623932	6
169	0	8	1	8.744897959	8
170	0	9	1	6.780952381	3
171	0	10	1	4.610294118	7
172	0	11	1	4.928571429	9
173	0	12	1	4.297297297	4
174	0	13	1	5.079710145	4
175	0	0	0	12.32786885	BLANK
176	0	0	0	12.12903226	1
177	0	0	0	6.622641509	BLANK
178	0	3	0	2.063492063	BLANK
179	0	0	0	1.909090909	BLANK
180	0	0	0	10.25	BLANK
181	0	0	0	3.688	BLANK
182	0	2	0	4.91588785	BLANK
183	0	0	0	2.87962963	BLANK
184	0	0	0	0.976445396	BLANK
185	0	0	0	1.75	BLANK
186	0	0	0	3.737704918	BLANK
187	0	1	1	6.796610169	1
188	0	2	1	9.089285714	4
189	0	3	1	9.803030303	6
190	0	4	1	14.66666667	8
191	0	5	1	11.61842105	10
192	0	6	1	17.02816901	13
193	0	7	1	15.77777778	19
194	0	8	1	16.56060606	19
195	0	9	1	8.666666667	13
196	0	10	1	10.9375	12
197	0	11	1	12.35507246	11
198	0	12	1	17.11570248	13
199	0	13	1	11.49673203	11
200	0	0	0	7.024390244	BLANK
201	0	0	0	4.482142857	BLANK
202	0	0	0	4.592592593	1
203	0	3	0	2.862068966	BLANK
204	0	3	0	2.681318681	3
205	0	0	0	10.46296296	BLANK
206	0	0	0	14.38709677	BLANK
207	0	3	0	8.280701754	BLANK
208	0	0	0	12.23636364	BLANK
209	0	0	1	5.58490566	BLANK
210	0	1	1	17.74757282	13
211	0	2	1	6.364864865	6
212	0	3	1	8.041666667	10
213	0	4	1	11.86516854	13
214	0	5	1	6.5	12
215	0	6	1	5.131944444	12
216	0	7	1	6.899328859	10
217	0	8	1	7.959731544	12
218	0	9	1	8.409090909	13
219	0	10	1	7.473372781	10
220	0	11	1	10.51968504	16
221	0	12	1	9	13
222	0	13	1	7.723214286	16
223	0	0	0	5.411111111	BLANK
224	0	3	0	6.581081081	BLANK
225	0	0	0	8.194174757	BLANK
226	0	2	0	10.72807018	BLANK
227	0	4	0	3.860465116	BLANK
228	0	0	0	32.5862069	BLANK
229	0	4	0	9.905660377	BLANK
230	0	0	1	5.491596639	BLANK
231	0	7	1	13.08064516	BLANK
232	0	0	1	6.386363636	BLANK
233	0	4	1	13.17910448	BLANK
234	0	4	1	13.1641791	7
235	0	0	0	3.137931034	BLANK
236	0	0	1	3.828282828	BLANK
237	0	0	1	4.076086957	BLANK
238	0	1	1	6.449275362	BLANK
239	0	1	1	7.076923077	BLANK
240	0	3	1	15.34210526	4
241	0	3	1	16.27027027	9
242	0	4	1	22.77777778	6
243	0	4	1	25.75	9
244	0	5	1	9.648648649	12
245	0	5	1	11.05714286	15
246	0	0	0	32.1827957	6
247	0	0	0	35.36046512	8
248	0	3	0	6.27826087	BLANK
249	0	5	0	5.574468085	BLANK
250	0	7	0	7.772972973	BLANK
251	0	0	0	9.054216867	BLANK
252	0	4	0	5.351351351	BLANK
253	0	5	0	6.806122449	BLANK
254	0	0	0	10.70967742	BLANK
255	0	0	0	9	BLANK
256	0	2	0	5.4	BLANK
257	0	2	0	4.950819672	1
258	0	0	0	9.16091954	BLANK
259	0	0	0	4.263803681	BLANK
260	0	2	0	10.7752809	BLANK
261	0	0	0	8.15625	BLANK
262	0	0	1	23.3	BLANK
263	0	1	1	27.90909091	BLANK
264	0	2	1	11.81914894	BLANK
265	0	3	1	15.4109589	8
266	0	4	1	10.25	11
267	0	5	1	11.94594595	11
268	0	0	1	8.816326531	BLANK
269	0	1	1	3.095238095	BLANK
270	0	0	1	62.14285714	BLANK
271	0	0	1	50.82352941	13
272	0	0	0	29.36	BLANK
273	0	2	0	14.90666667	BLANK
274	0	3	0	12.05882353	BLANK
275	0	10	0	11.47272727	BLANK
276	0	0	0	35.42307692	BLANK
277	0	0	0	8.088888889	BLANK
278	0	0	0	3.1875	BLANK
279	0	0	0	3.102272727	BLANK
280	0	0	1	1.664670659	BLANK
281	0	0	1	12.40206186	BLANK
282	0	2	1	20.25925926	BLANK
283	0	3	1	17.32876712	BLANK
284	0	5	1	19.05633803	BLANK
285	0	0	0	5.547945205	BLANK
286	0	0	0	6.013888889	1
287	0	5	0	12.27419355	BLANK
288	0	0	1	8.697916667	BLANK
289	0	0	1	8.356435644	4
290	0	2	1	9.023809524	BLANK
291	0	2	1	9.3625	8
292	0	3	1	6.961165049	BLANK
293	0	7	1	14.12941176	BLANK
294	0	0	1	6.824561404	BLANK
295	0	0	0	9.14893617	BLANK
296	0	0	1	14.41666667	BLANK
297	0	0	1	14.32	8
298	0	0	1	18.51351351	BLANK
299	0	0	1	18.02564103	14
300	0	1	1	7.653846154	13
301	0	2	1	9.175	13
302	0	3	1	13.27586207	12
303	0	4	1	10.6969697	11
304	0	5	1	14.25	12
305	0	6	1	10.93548387	9
306	0	7	1	17.0952381	13
307	0	8	1	19.13333333	12
308	0	9	1	11.87037037	11
309	0	10	1	6.217391304	9
310	0	11	1	4.009708738	7
311	0	12	1	8.301587302	7
312	0	13	1	10.2027027	6
313	0	0	1	0.116022099	BLANK
314	0	0	1	0.140243902	5
315	0	8	1	0.160377358	BLANK
316	0	8	1	0.147058824	BLANK
317	0	0	1	0.295597484	BLANK
318	0	0	1	0.297468354	BLANK
319	0	1	1	0.183098592	BLANK
320	0	1	1	0.223255814	10
321	0	2	1	0.168316832	BLANK
322	0	2	1	0.16751269	BLANK
323	0	4	1	0.339805825	BLANK
324	0	4	1	0.320754717	BLANK
325	0	0	0	3.691489362	BLANK
326	0	0	0	3.119266055	BLANK
327	0	2	0	2.086956522	BLANK
328	0	4	0	1.503144654	BLANK
329	0	6	0	2.125	BLANK
330	0	0	1	8.615384615	BLANK
331	0	3	1	16.0952381	BLANK
332	0	4	1	11.65384615	7
333	0	5	1	9.505494505	8
334	0	6	1	9.344444444	11
335	0	7	1	7.261363636	6
336	0	8	1	6.050420168	3
337	0	9	1	3.026666667	2
338	0	10	1	2.819548872	BLANK
339	0	0	1	4.376	BLANK
340	0	2	1	4.495495495	BLANK
341	0	0	0	18.57142857	BLANK
342	0	2	0	6.414414414	BLANK
343	0	4	0	10.31868132	BLANK
344	0	5	0	8.063829787	BLANK
345	0	0	1	4.197674419	BLANK
346	0	4	1	14.06944444	BLANK
347	0	4	1	14.1369863	4
348	0	0	1	4.25	BLANK
349	0	1	1	6.085714286	BLANK
350	0	1	1	5.833333333	BLANK
351	0	2	1	7.670588235	2
352	0	3	1	7.767123288	5
353	0	4	1	10.21917808	6
354	0	5	1	21.26829268	12
355	0	6	1	26.3125	17
356	0	7	1	12.60674157	19
357	0	8	1	7.709016393	18
358	0	9	1	8.425925926	19
359	0	0	0	4.692307692	BLANK
360	0	0	0	2.845528455	BLANK
361	0	3	0	2.614457831	BLANK
362	0	0	0	4.358585859	BLANK
363	0	2	0	1.515384615	BLANK
364	0	0	0	4.684782609	BLANK
365	0	5	0	20.72727273	BLANK
366	0	0	0	7.146788991	BLANK
367	0	0	0	7.191304348	BLANK
368	0	4	0	2.10989011	BLANK
369	0	0	1	9.31884058	BLANK
370	0	0	1	16.175	BLANK
371	0	1	1	16.01333333	8
372	0	2	1	20.22222222	8
373	0	3	1	12.61157025	9
374	0	4	1	21.98387097	9
375	0	5	1	23.71186441	10
376	0	6	1	16.74324324	10
377	0	7	1	10.64893617	8
378	0	8	1	12.11214953	11
379	0	9	1	7.594405594	11
380	0	10	1	11.06481481	12
381	0	11	1	27.97183099	18
382	0	12	1	17.19791667	16
383	0	13	1	13.94680851	10
384	0	0	0	8.807017544	BLANK
385	0	0	1	31.38235294	BLANK
386	0	0	1	10	BLANK
387	0	1	1	4.666666667	BLANK
388	0	2	1	7.635135135	BLANK
389	0	3	1	13.54716981	BLANK
390	0	4	1	17.08888889	6
391	0	5	1	16.12	5
392	0	6	1	12.84	5
393	0	7	1	12.60655738	5
394	0	8	1	10.48684211	5
395	0	0	0	5.010752688	BLANK
396	0	8	0	5.231213873	BLANK
397	0	9	0	6.26875	BLANK
398	0	9	0	5.928994083	2
399	0	0	1	14.36842105	BLANK
400	0	0	1	14.86842105	3
401	0	0	1	8.53271028	BLANK
402	0	1	1	6.245614035	BLANK
403	0	1	1	6.245614035	5
404	0	0	0	1.809954751	BLANK
405	0	0	0	1.813636364	BLANK
406	0	2	0	2.233695652	BLANK
407	0	0	1	6.689655172	3
408	0	1	1	8.514705882	5
409	0	2	1	5.670454545	2
410	0	3	1	10.67142857	10
411	0	4	1	6.37962963	7
412	0	5	1	6.028368794	4
413	0	6	1	8.552	7
414	0	7	1	6.111111111	3
415	0	8	1	5.420289855	3
416	0	9	1	4.267080745	2
417	0	10	1	5.038709677	2
418	0	0	0	5.346774194	BLANK
419	0	0	1	5.825581395	BLANK
420	0	0	0	7.420168067	BLANK
421	0	2	0	5.455782313	BLANK
422	0	10	0	6.574712644	BLANK
423	0	10	0	6.682352941	BLANK
424	0	12	0	4.341013825	BLANK
425	0	0	1	4.920863309	4
426	0	2	1	13.13157895	9
427	0	3	1	10.08737864	9
428	0	4	1	12.32608696	8
429	0	0	0	10.8	BLANK
430	0	0	0	4.219512195	BLANK
431	0	8	0	2.584415584	BLANK
432	0	8	0	2.477987421	0
433	0	10	0	3.662921348	BLANK
434	0	13	0	2.991735537	BLANK
435	0	0	0	11.79746835	BLANK
436	0	2	0	9.8	BLANK
437	0	0	0	5.123595506	BLANK
438	0	3	0	3.987951807	BLANK
439	0	0	0	11.88	BLANK
440	0	3	0	3.348484848	BLANK
441	0	3	0	3.281481481	0
442	0	4	0	4.949152542	BLANK
443	0	5	0	4.1	BLANK
444	0	5	0	4.475409836	0
445	0	10	0	4.613095238	BLANK
446	0	0	0	23.91304348	BLANK
447	0	8	0	54	BLANK
448	0	10	0	35.09302326	BLANK
449	0	0	0	13.47222222	BLANK
450	0	1	0	4.4625	BLANK
451	0	1	0	1.350515464	BLANK
452	0	0	0	2.872	BLANK
453	0	0	0	4.090909091	BLANK
454	0	4	0	3.316326531	BLANK
455	0	0	0	6.476190476	BLANK
456	0	0	0	1.982300885	1
457	0	0	0	3.444444444	0
458	0	0	0	13.75	BLANK
459	0	0	0	6.228187919	BLANK
460	0	0	0	4.421768707	BLANK
461	0	0	1	2.858490566	BLANK
462	0	3	1	4.772277228	BLANK
463	0	4	1	5.546511628	BLANK
464	0	5	1	6.344086022	BLANK
465	0	6	1	5.773195876	BLANK
466	0	7	1	8.202702703	BLANK
467	0	8	1	8.088235294	BLANK
468	0	9	1	6.835443038	BLANK
469	0	11	1	3.416666667	BLANK
470	0	0	1	11.29787234	BLANK
471	0	0	0	5.768115942	BLANK
472	0	1	0	4.146341463	BLANK
473	0	0	0	2.078431373	BLANK
474	0	4	0	1.821917808	BLANK
475	0	4	0	1.697368421	1
476	0	0	0	7.4	BLANK
477	0	1	0	2.403225806	BLANK
478	0	1	0	2.348837209	BLANK
479	0	4	0	3.224489796	BLANK
485	0	0	1	11.24615385	BLANK
486	0	0	1	8.962025316	BLANK
487	0	1	1	7.836734694	BLANK
488	0	2	1	12.42857143	BLANK
489	0	3	1	7.918918919	BLANK
490	0	4	1	13.35294118	BLANK
491	0	5	1	14.37313433	14
492	0	6	1	14.30208333	13
493	0	7	1	14.14457831	15
494	0	0	0	9.177777778	BLANK
495	0	0	0	9.109489051	3
496	0	0	1	13.59166667	16
497	0	0	1	12.30769231	15
498	0	1	1	6.656626506	4
499	0	2	1	8.109589041	6
500	0	0	0	8.364705882	BLANK
501	0	2	0	14.22	BLANK
502	0	0	0	3.986111111	BLANK
503	0	0	0	4.378787879	0
504	0	5	0	7.563106796	BLANK
505	0	5	0	7.878787879	6
506	0	0	1	11.55128205	BLANK
507	0	2	1	17.15151515	8
508	0	3	1	11.1011236	7
509	0	4	1	12.99029126	8
510	0	5	1	12.81318681	8
511	0	6	1	12.90322581	17
512	0	7	1	9.939393939	13
513	0	8	1	6.741935484	12
514	0	9	1	4.739495798	12
515	0	10	1	4.066115702	BLANK
516	0	10	1	4.275	11
517	0	11	1	5.643478261	11
518	0	12	1	6.80620155	11
519	0	13	1	9.789115646	14
520	0	0	0	2.647058824	BLANK
521	0	0	0	4.373333333	BLANK
522	0	2	0	2.242105263	BLANK
523	0	0	1	7.757142857	BLANK
524	0	0	1	7.878787879	BLANK
525	0	1	1	3.666666667	BLANK
526	0	1	1	3.701923077	5
527	0	2	1	3.019417476	5
528	0	3	1	3.35	5
529	0	4	1	4.079207921	5
530	0	6	1	3.656565657	BLANK
531	0	6	1	3.59	5
532	0	0	1	13.83333333	BLANK
533	0	1	1	7.229508197	BLANK
534	0	2	1	10.91489362	BLANK
535	0	3	1	9.113636364	BLANK
536	0	4	1	8.254901961	BLANK
537	0	5	1	8.417910448	9
538	0	6	1	6.053333333	7
539	0	7	1	10.82352941	10
540	0	8	1	6.904761905	7
541	0	9	1	7.648148148	8
542	0	10	1	10.84444444	11
543	0	11	1	15.29166667	7
544	0	12	1	6.402777778	5
545	0	13	1	5.845238095	3
546	0	0	1	6.571428571	BLANK
547	0	0	1	6.2	2
548	0	1	1	8.891891892	BLANK
549	0	1	1	9.314285714	4
550	0	2	1	5.413793103	BLANK
551	0	2	1	5.734939759	2
552	0	3	1	6.2375	BLANK
553	0	3	1	6.0625	7
554	0	4	1	5.526315789	BLANK
555	0	4	1	5.857142857	7
556	0	5	1	13.625	BLANK
557	0	5	1	12.60655738	10
558	0	6	1	8.152542373	11
559	0	7	1	4.753424658	BLANK
560	0	7	1	4.819444444	7
561	0	8	1	4.904761905	6
562	0	9	1	6.348484848	9
563	0	10	1	5.384615385	4
564	0	11	1	7.208791209	9
565	0	12	1	14.01587302	9
566	0	13	1	9.432432432	8
567	0	0	1	2.201219512	BLANK
568	0	0	0	6.264705882	BLANK
569	0	2	0	5.393258427	BLANK
570	0	4	0	5.742857143	BLANK
571	0	8	0	9.266666667	BLANK
572	0	0	0	3.429752066	BLANK
573	0	1	0	2.252808989	BLANK
574	0	3	0	1.702247191	BLANK
575	0	0	0	7.105769231	BLANK
576	0	0	0	8.25	BLANK
577	0	2	0	4.109589041	BLANK
578	0	0	1	20.375	BLANK
579	0	0	1	7.763636364	BLANK
580	0	1	1	19.92982456	BLANK
581	0	3	1	22.3442623	BLANK
582	0	3	1	19.72307692	14
583	0	4	1	6.106741573	11
584	0	5	1	12.33552632	15
585	0	6	1	5.318584071	8
586	0	7	1	9.135294118	11
587	0	8	1	7.203045685	6
588	0	10	1	5.890625	BLANK
589	0	12	1	3.280193237	BLANK
590	0	0	0	8.688679245	BLANK
591	0	0	0	6.162162162	BLANK
592	0	0	0	9.603773585	BLANK
593	0	0	0	3.993548387	BLANK
594	0	2	0	3.35483871	BLANK
595	0	2	1	9.797101449	BLANK
596	0	4	1	10.3	BLANK
597	0	0	1	18.9047619	BLANK
598	0	1	1	14.95714286	10
599	0	2	1	12.45	10
600	0	3	1	17.21666667	12
601	0	4	1	10.57731959	8
602	0	5	1	18.94029851	BLANK
603	0	6	1	19.05263158	BLANK
604	0	7	1	16.7625	BLANK
605	0	9	1	8.014084507	8
606	0	10	1	6.255555556	8
607	0	11	1	20.69767442	9
608	0	12	1	16.40229885	6
609	0	13	1	11.40206186	8
610	0	0	0	9.482142857	BLANK
611	0	0	1	3.83	BLANK
612	0	2	1	2.081395349	2
613	0	2	1	2.028248588	2
614	0	3	1	2.167832168	2
615	0	4	1	3.79047619	3
616	0	4	1	3.8	3
617	0	5	1	5.516129032	2
618	0	6	1	6.5	2
619	0	7	1	4.322834646	3
620	0	8	1	3.647482014	4
621	0	9	1	3.745614035	3
622	0	10	1	4.455223881	2
623	0	11	1	4.753424658	1
624	0	12	1	3.981012658	2
625	0	13	1	4.404761905	2
626	0	0	0	9.153846154	BLANK
627	0	0	0	9.535211268	BLANK
628	0	0	1	10.48333333	BLANK
629	0	0	0	7.597560976	BLANK
630	0	0	0	4.531746032	BLANK
631	0	2	0	5.354545455	BLANK
632	0	0	1	7.449275362	BLANK
633	0	2	1	13.89361702	BLANK
634	0	5	1	10.95918367	BLANK
635	0	6	1	13.97297297	BLANK
636	0	7	1	13.17142857	BLANK
637	0	8	1	14.69117647	BLANK
638	0	8	1	16.41935484	11
639	0	0	0	4.5875	BLANK
640	0	0	1	2.246153846	BLANK
641	0	2	1	5.423076923	BLANK
642	0	0	1	20.28571429	BLANK
643	0	1	1	14.30612245	BLANK
644	0	2	1	10.04285714	BLANK
645	0	2	1	10.57352941	5
646	0	3	1	8.569230769	BLANK
647	0	4	1	14.05660377	BLANK
648	0	5	1	12.54545455	BLANK
649	0	6	1	9.727272727	BLANK
650	0	7	1	9.090909091	BLANK
651	0	8	1	5.941747573	6
652	0	9	1	6	6
653	0	0	0	11.39583333	BLANK
654	0	0	1	1.164634146	BLANK
655	0	8	1	3.708333333	BLANK
656	0	8	1	3.739726027	7
657	0	0	0	2.721893491	BLANK
658	0	1	0	2.612403101	BLANK
659	0	0	0	5.462686567	BLANK
660	0	2	0	2.835443038	BLANK
661	0	0	0	9.738095238	BLANK
662	0	11	0	6.128712871	BLANK
663	0	0	0	5.037037037	BLANK
664	0	2	0	8.436363636	BLANK
665	0	1	1	23.62318841	BLANK
666	0	1	1	23.35211268	12
667	0	2	1	23.26229508	BLANK
668	0	5	1	8.588235294	BLANK
669	0	6	1	10.80487805	BLANK
670	0	7	1	18.01754386	BLANK
671	0	8	1	24.70588235	BLANK
672	0	9	1	16.8372093	BLANK
673	0	10	1	17.85	BLANK
674	0	13	1	9.224637681	BLANK
675	0	0	0	8.24	BLANK
676	0	0	0	5.148148148	BLANK
677	0	0	1	8.134020619	BLANK
678	0	0	0	5.628205128	BLANK
679	0	10	0	10.93495935	BLANK
680	0	0	0	4.17	BLANK
681	0	0	0	1.75	BLANK
682	0	0	0	2.789473684	BLANK
683	0	0	1	0.786127168	BLANK
684	0	0	0	6.532258065	BLANK
685	0	0	1	13.10606061	BLANK
686	0	8	0	3.754189944	BLANK
687	0	10	0	3.724358974	BLANK
688	0	0	0	7.102564103	BLANK
689	0	0	0	1.85106383	BLANK
690	0	0	0	2.582822086	BLANK
691	0	0	1	53.2	BLANK
692	0	0	1	90.26315789	BLANK
693	0	1	1	49.93103448	BLANK
694	0	4	1	24.33333333	BLANK
695	0	4	1	21.04347826	8
696	0	0	0	2.637254902	BLANK
697	0	0	1	2.023529412	BLANK
698	0	0	0	16.44	BLANK
699	0	2	0	31.33333333	BLANK
700	0	4	0	27.39130435	BLANK
701	0	4	0	41.15	BLANK
702	0	0	0	9.911111111	BLANK
703	0	4	0	7.875	BLANK
704	0	0	0	6.46875	BLANK
705	0	1	0	10.8852459	BLANK
706	0	0	0	1.662420382	BLANK
707	0	4	0	4.621621622	BLANK
708	0	0	0	4.68	BLANK
709	0	0	0	3.365384615	BLANK
710	0	0	0	2.77027027	BLANK
711	0	0	1	1.76635514	BLANK
712	0	3	1	4.921875	2
713	0	4	1	5.87037037	2
714	0	5	1	4.770491803	1
715	0	6	1	4.053097345	0
716	0	7	1	3.407079646	3
717	0	8	1	2.686440678	6
718	0	9	1	5.811926606	7
719	0	10	1	4.142335766	2
720	0	12	1	6.634831461	BLANK
721	0	0	1	10.4	BLANK
722	0	2	1	10.88709677	BLANK
723	0	5	1	18.47887324	8
724	0	6	1	14.40860215	5
725	0	7	1	9.535433071	10
726	0	11	1	9.584745763	BLANK
727	0	0	0	3.202614379	BLANK
728	0	0	1	9.257142857	BLANK
729	0	0	0	10.2	BLANK
730	0	0	0	18.96774194	BLANK
731	0	0	0	20.10169492	8
732	0	0	1	6.538461538	BLANK
733	0	2	1	5.527777778	3
734	0	4	1	4.863636364	3
735	0	5	1	4.658536585	1
736	0	6	1	4.191489362	1
737	0	7	1	3	0
738	0	0	0	6.104347826	BLANK
739	0	0	1	6.269005848	BLANK
740	0	3	1	12.8	BLANK
741	0	0	1	10.31794872	BLANK
742	0	0	1	22.5862069	7
743	0	1	1	8.413793103	5
744	0	2	1	20.86956522	8
745	0	3	1	7.127118644	5
746	0	4	1	8.460176991	7
747	0	5	1	8.263157895	12
748	0	6	1	13.97297297	10
749	0	0	1	2.503006012	BLANK
750	0	0	1	2.497983871	BLANK
751	0	0	0	7.028301887	BLANK
752	0	2	0	2.270833333	BLANK
753	0	0	1	16.8	BLANK
754	0	5	1	24.18518519	BLANK
755	0	0	0	5.526315789	BLANK
756	0	4	0	3.403162055	BLANK
757	0	6	0	2.432055749	BLANK
758	0	7	0	2.345565749	BLANK
759	0	0	0	8.060606061	BLANK
760	0	0	1	2.368421053	BLANK
761	0	2	1	2.490566038	BLANK
762	0	6	1	11.37373737	10
763	0	7	1	5.843478261	5
764	0	0	0	2.436464088	BLANK
765	0	2	0	0.771428571	BLANK
766	0	0	0	4.163461538	BLANK
767	0	0	0	7.855421687	BLANK
768	0	0	0	7.987951807	4
769	0	0	0	2.009009009	BLANK
770	0	0	1	7.064102564	BLANK
771	0	1	1	6.851351351	BLANK
772	0	2	1	4.582278481	4
773	0	3	1	5.466165414	6
774	0	4	1	3.736842105	5
775	0	0	0	1.617647059	BLANK
776	0	0	1	8.068965517	BLANK
777	0	0	1	7.029411765	BLANK
778	0	1	1	4.734463277	BLANK
779	0	2	1	15.8	16
780	0	0	0	5.388888889	BLANK
781	0	0	0	4.847619048	1
782	0	2	0	1.366459627	BLANK
783	0	2	0	1.262857143	4
784	0	0	1	131	BLANK
785	0	0	1	8.87804878	BLANK
786	0	7	1	31.25714286	BLANK
787	0	7	1	28.25641026	10
788	0	0	1	10.44117647	BLANK
789	0	2	1	3.746153846	4
790	0	3	1	3.357798165	5
791	0	4	1	3.248120301	BLANK
792	0	4	1	3.310606061	4
793	0	5	1	2.452229299	BLANK
794	0	5	1	2.616883117	4
795	0	6	1	2.771276596	BLANK
796	0	6	1	2.776041667	6
797	0	8	1	3.074074074	7
798	0	9	1	4.627118644	4
799	0	10	1	8.205357143	9
800	0	11	1	6.303921569	7
801	0	12	1	7.395833333	10
802	0	13	1	7.5	10
803	0	0	0	6.546666667	BLANK
804	0	0	0	1.627027027	BLANK
805	0	0	1	7.4	BLANK
806	0	2	1	5.594594595	BLANK
807	0	0	0	16.55	BLANK
808	0	0	0	5.638655462	BLANK
809	0	2	0	4.663366337	BLANK
810	0	0	1	10.78461538	BLANK
811	0	1	1	7.8125	4
812	0	2	1	12.72093023	5
813	0	3	1	10.88505747	5
814	0	4	1	12.80645161	4
815	0	5	1	14.72413793	4
816	0	6	1	15.45588235	4
817	0	7	1	22.2	8
818	0	8	1	11.91	4
819	0	12	1	13.91566265	BLANK
820	0	13	1	8.301724138	BLANK
821	0	0	0	2.465346535	BLANK
822	0	0	0	6.343283582	BLANK
823	0	7	0	4.131313131	BLANK
824	0	0	0	4.370629371	BLANK
825	0	0	1	4.275862069	BLANK
826	0	2	1	1.513888889	BLANK
827	0	2	1	1.594202899	1
828	0	4	1	5.678571429	BLANK
829	0	4	1	4.875	1
830	0	6	1	8.157894737	BLANK
831	0	6	1	8.405405405	1
832	0	0	0	1.4	BLANK
833	0	3	0	2.228571429	BLANK
834	0	0	0	2.551282051	BLANK
835	0	0	1	17.48387097	BLANK
836	0	0	1	9.38028169	BLANK
837	0	1	1	5.378947368	2
838	0	2	1	8.625	4
839	0	3	1	8.413793103	4
840	0	4	1	7.152542373	6
841	0	5	1	12.60714286	8
842	0	6	1	19.49180328	15
843	0	7	1	9.142857143	8
844	0	8	1	12.49350649	6
845	0	9	1	9.787234043	6
846	0	10	1	10.04424779	7
847	0	11	1	12.89156627	BLANK
848	0	12	1	5.727891156	BLANK
849	0	13	1	12.01282051	12
850	0	0	1	16.72727273	BLANK
851	0	7	1	9.096491228	BLANK
852	0	13	1	16.38888889	BLANK
853	0	13	1	37.19148936	BLANK
854	0	0	0	3.424528302	BLANK
855	0	2	0	2.15	BLANK
856	0	0	0	4.295238095	BLANK
857	0	0	0	5.545454545	BLANK
858	0	4	1	11.89393939	BLANK
859	0	5	1	12.46153846	4
860	0	6	1	8.848101266	7
861	0	13	1	5.661417323	BLANK
862	0	7	1	8.131313131	4
863	0	8	1	16.2	5
864	0	9	1	12	8
865	0	10	1	12.14545455	5
866	0	11	1	5.723684211	3
867	0	12	1	4.959183673	4
868	0	13	1	3.588235294	1
869	0	13	1	3.588235294	1
870	0	3	0	3.514705882	BLANK
871	0	4	1	20.53846154	7
872	0	5	1	22.6	10
873	0	6	1	18.7	12
874	0	7	1	19.80952381	14
875	0	8	1	18.42857143	18
876	0	9	1	18.86363636	18
877	0	10	1	19.25531915	18
878	0	11	1	17.90697674	17
879	0	12	1	19.35714286	13
880	0	13	1	20.71428571	13
881	0	0	1	3.025641026	BLANK
882	0	1	1	4.317460317	2
883	0	2	1	4.651515152	3
884	0	3	1	5.090909091	BLANK
885	0	0	1	10.44285714	BLANK
886	0	3	1	18.31428571	9
887	0	4	1	17.23943662	8
888	0	5	1	19.07142857	10
889	0	6	1	15.05970149	5
890	0	7	1	14.30952381	4
891	0	13	1	20.90756303	10
892	0	0	1	5.352941176	BLANK
893	0	3	1	7.707070707	BLANK
894	0	4	1	8.506024096	BLANK
895	0	4	1	8.962025316	13
896	0	5	1	8.255102041	BLANK
897	0	5	1	8.212765957	14
898	0	6	1	9.56	16
899	0	7	1	9.461538462	11
900	0	8	1	6.636986301	10
901	0	9	1	9.155405405	13
902	0	10	1	8.52991453	12
903	0	0	0	2.407079646	BLANK
904	0	3	0	3.324074074	BLANK
905	0	0	1	5.068493151	BLANK
906	0	0	1	4.507042254	BLANK
907	0	1	1	2.235849057	2
908	0	2	1	4.041666667	2
909	0	3	1	8.209302326	4
910	0	4	1	4.692307692	2
911	0	5	1	5.590163934	5
912	0	0	1	9.160493827	BLANK
913	0	2	1	13.125	BLANK
914	0	4	1	11.71311475	14
915	0	0	1	4.189189189	BLANK
916	0	2	1	7.833333333	7
917	0	3	1	2.401197605	3
918	0	4	1	2.699386503	1
919	0	5	1	4.375722543	2
920	0	6	1	4.649350649	BLANK
921	0	7	1	7.615384615	1
922	0	8	1	4.331325301	2
923	0	9	1	6.2	3
924	0	10	1	4.543209877	BLANK
925	0	10	1	4.845679012	2
926	0	10	1	4.833333333	BLANK
927	0	11	1	6.976190476	1
928	0	12	1	4.556213018	2
929	0	12	1	4.323863636	BLANK
930	0	13	1	4.428571429	2
931	0	0	0	11.84210526	BLANK
932	0	0	0	2.397260274	BLANK
933	0	0	1	14.45614035	BLANK
934	0	0	1	10.41509434	BLANK
935	0	2	1	27.93103448	BLANK
936	0	3	1	19.03636364	4
937	0	5	1	24.38095238	BLANK
938	0	6	1	18.25531915	9
939	0	7	1	8.892857143	BLANK
940	0	8	1	8.183098592	6
941	0	8	1	7.108108108	5
942	0	9	1	10.125	7
943	0	10	1	10.61764706	4
944	0	11	1	6.047368421	1
945	0	12	1	26.70454545	6
946	0	13	1	12.49264706	8
947	0	0	1	12.21428571	5
948	0	4	1	25.375	9
949	0	5	1	16.59677419	13
950	0	6	1	16.078125	10
951	0	7	1	10.19791667	11
952	0	8	1	17.1375	13
953	0	9	1	12.61538462	14
954	0	10	1	14.55395683	16
955	0	11	1	14.05128205	17
956	0	12	1	9.611510791	17
957	0	13	1	11.10810811	15
958	0	0	0	4.758241758	BLANK
959	0	1	0	6.260869565	BLANK
960	0	0	0	6.556291391	BLANK
961	0	0	0	6.459016393	BLANK
962	0	0	1	17.43209877	BLANK
963	0	0	1	7.034188034	BLANK
964	0	1	1	22.18421053	BLANK
965	0	2	1	12.27350427	7
966	0	3	1	8.181034483	9
967	0	4	1	4.906832298	9
968	0	5	1	5.460122699	5
969	0	6	1	6.339506173	5
970	0	7	1	6.519685039	5
971	0	8	1	10.62962963	9
972	0	9	1	7.299270073	5
973	0	9	1	7.299270073	5
974	0	10	1	8.503937008	9
975	0	11	1	7.608974359	4
976	0	12	1	16.57894737	8
977	0	13	1	9.590909091	7
978	0	0	1	14.31868132	BLANK
979	0	0	0	3.370786517	BLANK
980	0	0	1	7.484536082	BLANK
981	0	1	1	8.733333333	BLANK
982	0	2	1	5.646017699	BLANK
983	0	0	1	1.548387097	7
984	0	4	1	1.068965517	7
985	0	5	1	0.980392157	8
986	0	6	1	1.406976744	10
987	0	7	1	1.40625	6
988	0	8	1	1.2875	10
989	0	0	0	2.896226415	BLANK
990	0	0	0	7.572916667	2
991	0	1	0	7.381443299	BLANK
992	0	2	0	11.70212766	BLANK
993	0	4	0	8	BLANK
994	0	6	0	14.53846154	BLANK
995	0	7	0	5.631578947	BLANK
996	0	0	1	4.272727273	BLANK
997	0	0	0	4.775956284	BLANK
998	0	2	0	6.459259259	BLANK
999	0	9	0	12.53921569	BLANK
1000	0	0	0	5.065088757	BLANK
1001	0	0	0	5.043290043	BLANK
1002	0	0	0	3.114942529	BLANK
1003	0	6	0	4.080808081	BLANK
1004	0	0	0	1.451807229	BLANK
1005	0	0	0	4.670886076	BLANK
1006	0	0	0	6.529411765	BLANK
1007	0	0	1	1.975903614	BLANK
1008	0	3	1	4.12195122	BLANK
1009	0	0	0	1.75	BLANK
1010	0	0	0	5.039215686	BLANK
1011	0	0	0	3.710843373	0
1012	0	0	0	4.551020408	BLANK
1013	0	0	0	1.571428571	BLANK
1014	0	0	1	5.715789474	BLANK
1015	0	0	0	9.859649123	BLANK
1016	0	1	0	7.155172414	BLANK
1017	0	11	0	3.825174825	BLANK
1018	0	0	0	18.98333333	BLANK
1019	0	0	1	13.76666667	BLANK
1020	0	1	1	14	BLANK
1021	0	3	1	9.833333333	BLANK
1022	0	4	1	12.60526316	6
1023	0	5	1	17.77777778	11
1024	0	6	1	31.38461538	17
1025	0	7	1	18.36956522	10
1026	0	8	1	23.5862069	17
1027	0	9	1	21.33333333	18
1028	0	10	1	11.03773585	8
1029	0	10	1	12.42222222	7
1030	0	11	1	15.35087719	8
1031	0	0	0	2.957446809	BLANK
1032	0	0	0	6.142857143	BLANK
1033	0	0	1	5.803030303	BLANK
1034	0	1	1	5.875	3
1035	0	2	1	1.381355932	1
1036	0	3	1	0.748571429	0
1037	0	4	1	0.595454545	0
1038	0	5	1	0.635379061	0
1039	0	6	1	1.828431373	BLANK
1040	0	0	0	5.582857143	BLANK
1041	0	0	0	10.28395062	BLANK
1042	0	0	0	4.013888889	BLANK
1043	0	0	0	7.125	BLANK
1044	0	1	0	4.4	BLANK
1045	0	0	0	4.602272727	BLANK
1046	0	0	0	4.831858407	BLANK
1047	0	0	0	2.12	BLANK
1048	0	0	0	2.890585242	BLANK
1049	0	0	1	12.875	BLANK
1050	0	0	1	11.75728155	10
1051	0	0	1	12.50505051	7
1052	0	0	0	3.544554455	BLANK
1053	0	2	0	3.084745763	BLANK
1054	0	0	0	12.20754717	BLANK
1055	0	0	1	15.57777778	BLANK
1056	0	0	1	10.01886792	BLANK
1057	0	0	1	10.7173913	BLANK
1058	0	5	1	28.96969697	BLANK
1059	0	0	0	2.413934426	BLANK
1060	0	0	0	2.154205607	BLANK
1061	0	7	0	6.227777778	BLANK
1062	0	0	0	6.849673203	BLANK
1063	0	1	0	1.850746269	BLANK
1064	0	3	0	3.101910828	BLANK
1065	0	0	0	5.019230769	BLANK
1066	0	0	0	10.61728395	BLANK
1067	0	3	0	2.024390244	BLANK
1068	0	0	0	4.87654321	BLANK
1069	0	0	0	4.165354331	BLANK
1070	0	2	0	3.352517986	BLANK
1071	0	0	0	7.96875	BLANK
1072	0	0	1	5.081632653	BLANK
1073	0	1	1	3.546511628	0
1074	0	2	1	5.156521739	1
1075	0	3	1	4.752066116	2
1076	0	4	1	4.709497207	5
1077	0	5	1	4.257142857	9
1078	0	6	1	7.709302326	11
1079	0	7	1	10.37984496	14
1080	0	8	1	5.55721393	7
1081	0	9	1	5.195767196	6
1082	0	9	1	5.510869565	4
1083	0	10	1	5.911764706	8
1084	0	11	1	7.317241379	10
1085	0	12	1	5.503030303	5
1086	0	12	1	6.057692308	5
1087	0	13	1	4.120689655	6
1088	0	13	1	4.349112426	5
1089	0	0	1	4.138297872	BLANK
1090	0	4	1	12.42045455	8
1091	0	8	1	9.666666667	BLANK
1092	0	11	1	26.94230769	9
1093	0	0	1	9.653846154	BLANK
1094	0	6	1	19	18
1095	0	7	1	12.66386555	11
1096	0	8	1	13.41111111	8
1097	0	9	1	11.18446602	10
1098	0	10	1	11.03333333	8
1099	0	11	1	21.57377049	10
1100	0	12	1	15.01492537	BLANK
1101	0	12	1	8.656565657	8
1102	0	13	1	4.816901408	6
1103	0	0	1	5.552083333	BLANK
1104	0	3	1	9.790123457	BLANK
1105	0	5	1	4.440366972	4
1106	0	6	1	5.221052632	4
1107	0	7	1	5.558558559	3
1108	0	8	1	4.633587786	3
1109	0	9	1	3.839160839	6
1110	0	10	1	2.981481481	3
1111	0	11	1	2.630952381	3
1112	0	12	1	8.168918919	4
1113	0	0	0	5.350515464	BLANK
1114	0	0	0	4.6	BLANK
1115	0	5	0	3.861111111	BLANK
1116	0	0	0	13.9047619	BLANK
1117	0	2	0	19.07246377	BLANK
1118	0	3	0	12.7375	BLANK
1119	0	0	1	19.97727273	BLANK
1120	0	1	1	19.13513514	BLANK
1121	0	2	1	40.07692308	10
1122	0	5	1	16.56818182	BLANK
1123	0	6	1	73.2962963	15
1124	0	7	1	48.26086957	17
1125	0	0	1	5.510638298	BLANK
1126	0	0	1	5.822222222	BLANK
1127	0	0	0	5.285714286	BLANK
1128	0	0	0	9.475	BLANK
1129	0	5	0	6.805970149	BLANK
1130	0	0	0	2.752873563	BLANK
1131	0	0	0	3.525862069	BLANK
1132	0	1	0	1.916201117	BLANK
1133	0	5	0	2.15625	BLANK
1134	0	5	0	2.053846154	BLANK
1135	0	0	0	7.735849057	BLANK
1136	0	2	0	5.387096774	BLANK
1137	0	0	0	1.20657277	BLANK
1138	0	0	1	3.598130841	BLANK
1139	0	2	1	4.811594203	2
1140	0	3	1	4.74	1
1141	0	4	1	4.856164384	4
1142	0	5	1	3.13368984	4
1143	0	6	1	3.097826087	6
1144	0	7	1	4.294117647	4
1145	0	8	1	2.455555556	3
1146	0	9	1	2.410958904	6
1147	0	10	1	2.715116279	6
1148	0	11	1	2.630841121	9
1149	0	12	1	3.403846154	9
1150	0	13	1	4.661073826	7
1151	0	1	1	20.45652174	BLANK
1152	0	2	1	7.476190476	BLANK
1153	0	4	1	15.29787234	BLANK
1154	0	6	1	14.2	BLANK
1155	0	11	1	13.17142857	BLANK
1156	0	0	0	1.265780731	BLANK
1157	0	0	0	2.075067024	BLANK
1158	0	3	0	2.484507042	BLANK
1159	0	0	0	4	BLANK
1160	0	0	0	7.428571429	BLANK
1161	0	0	0	7.974358974	BLANK
1162	0	2	0	3.45	BLANK
1163	0	4	0	2.180327869	BLANK
1164	0	0	1	2.74251497	BLANK
1165	0	5	1	18.50943396	5
1166	0	6	1	7.462264151	0
1167	0	7	1	2.641304348	0
1168	0	8	1	1.608856089	2
1169	0	0	0	22.8	4
1170	0	0	0	7.037974684	BLANK
1171	0	2	0	7.917910448	BLANK
1172	0	0	1	7.417910448	BLANK
1173	0	5	1	6.012820513	7
1174	0	6	1	13.65454545	11
1175	0	7	1	9.387096774	BLANK
1176	0	8	1	6.892307692	5
1177	0	9	1	6.161971831	4
1178	0	10	1	7.437751004	7
1179	0	11	1	13.64166667	7
1180	0	12	1	10.31092437	7
1181	0	12	1	10.31092437	7
1182	0	13	1	11.89423077	6
1183	0	0	1	29.86206897	BLANK
1184	0	4	1	28.125	BLANK
1185	0	7	1	16.0212766	18
1186	0	8	1	22.30188679	17
1187	0	9	1	15.95575221	15
1188	0	9	1	15.52586207	13
1189	0	10	1	26.22222222	14
1190	0	10	1	27.25	15
1191	0	0	0	7.242990654	BLANK
1192	0	7	0	5.404411765	BLANK
1193	0	0	0	14.90697674	BLANK
1194	0	0	0	4.065934066	BLANK
1195	0	0	0	7.96875	BLANK
1196	0	10	0	9.646153846	BLANK
1197	0	11	0	10.06849315	BLANK
1198	0	0	0	12.98360656	BLANK
1199	0	0	1	7.038461538	BLANK
1200	0	7	1	12.7260274	BLANK
1201	0	7	1	13.68421053	BLANK
1202	0	8	1	11.27941176	6
1203	0	10	1	8.08988764	5
1204	0	10	1	7.846846847	BLANK
1205	0	11	1	5.95412844	2
1206	0	12	1	7.652173913	4
1207	0	13	1	7.802197802	6
1208	0	0	1	11.69491525	BLANK
1209	0	0	0	14.51515152	BLANK
1210	0	0	1	11.96969697	BLANK
1211	0	0	0	41.82857143	4
1212	0	2	0	6.149253731	1
1213	0	4	0	2.229885057	0
1214	0	0	1	27.05454545	BLANK
1215	0	2	1	24.57142857	9
1216	0	3	1	18.90196078	7
1217	0	4	1	10.37634409	5
1218	0	5	1	8.610526316	5
1219	0	6	1	7.492307692	6
1220	0	7	1	8.921875	9
1221	0	8	1	14.77777778	7
1222	0	9	1	6.630208333	4
1223	0	10	1	16.50485437	11
1224	0	11	1	22.80208333	11
1225	0	12	1	19.38679245	9
1226	0	13	1	20.2991453	10
1227	0	0	0	7.107142857	BLANK
1228	0	0	1	8.895522388	BLANK
1229	0	0	1	9.768	BLANK
1230	0	7	1	23.075	BLANK
1231	0	10	1	11.41176471	BLANK
1232	0	0	1	4.93258427	BLANK
1233	0	5	1	12.51162791	BLANK
1234	0	8	1	21.02777778	8
1235	0	9	1	16.97029703	8
1236	0	10	1	19.98611111	5
1237	0	11	1	10.22516556	4
1238	0	1	0	1.460227273	BLANK
1239	0	0	0	3.362637363	BLANK
1240	0	0	0	22.64705882	BLANK
1241	0	8	0	9.455696203	BLANK
1242	0	0	1	0.160856783	BLANK
1243	0	1	1	0.130832131	BLANK
1244	0	4	1	0.147976283	2
1245	0	4	1	0.152366095	8
1246	0	5	1	0.219222904	6
1247	0	5	1	0.221209611	5
1248	0	6	1	0.191712204	5
1249	0	6	1	0.18647085	9
1250	0	7	1	0.184966388	5
1251	0	7	1	0.180516337	5
1252	0	0	0	8.961538462	BLANK
1253	0	0	0	2.5	BLANK
1254	0	2	0	1.91954023	BLANK
1255	0	4	0	2.536144578	BLANK
1256	0	5	0	2.073732719	BLANK
1257	0	0	1	1.887850467	BLANK
1258	0	0	0	5.971590909	BLANK
1259	0	0	0	7.247191011	BLANK
1260	0	0	0	3.178082192	BLANK
1261	0	0	1	3.63559322	BLANK
1262	0	3	1	14.53846154	7
1263	0	4	1	12.33050847	7
1264	0	5	1	8.875	5
1265	0	6	1	4.154411765	1
1266	0	7	1	5.658823529	0
1267	0	8	1	6.790322581	4
1268	0	9	1	6.1015625	3
1269	0	10	1	5.2	3
1270	0	10	1	5.2	3
1271	0	11	1	3.507936508	4
1272	0	12	1	2.962732919	2
1273	0	13	1	3.134453782	7
1274	0	0	1	20.54736842	BLANK
1275	0	1	1	15.52892562	BLANK
1276	0	1	1	15.95652174	BLANK
1277	0	0	0	9.705882353	BLANK
1278	0	6	0	3.555555556	1
1279	0	0	1	5.533980583	BLANK
1280	0	1	1	6.0625	BLANK
1281	0	2	1	8.436170213	7
1282	0	3	1	19.33333333	BLANK
1283	0	4	1	20.81666667	BLANK
1284	0	4	1	19.54054054	10
1285	0	5	1	14.68041237	8
1286	0	6	1	9.034782609	BLANK
1287	0	7	1	8.077380952	6
1288	0	8	1	7.796791444	6
1289	0	0	0	2	BLANK
1290	0	2	0	1.726618705	BLANK
1291	0	0	0	12.53061224	BLANK
1292	0	1	0	10.57142857	BLANK
1293	0	0	0	0.232887189	BLANK
1294	0	0	0	2.581818182	BLANK
1295	0	8	0	8.173553719	BLANK
1296	0	0	1	2.81981982	BLANK
1297	0	0	0	6.43902439	BLANK
1298	0	0	1	18.46511628	6
1299	0	2	1	23.76315789	6
1300	0	3	1	20.21621622	10
1301	0	3	1	21.08333333	7
1302	0	4	1	12.03488372	4
1303	0	5	1	24.11627907	9
1304	0	6	1	11.88157895	5
1305	0	7	1	8.775362319	5
1306	0	8	1	16.37209302	6
1307	0	9	1	10.03676471	6
1308	0	10	1	12.40384615	6
1309	0	10	1	12.40384615	6
1310	0	11	1	11.90163934	6
1311	0	12	1	8.227272727	6
1312	0	13	1	10.27950311	7
1313	0	0	0	13.60952381	BLANK
1314	0	0	0	13.31081081	BLANK
1315	0	0	0	8.464788732	BLANK
1316	0	0	0	4.616883117	BLANK
1317	0	0	0	13.07407407	BLANK
1318	0	0	0	1.95951417	BLANK
1319	0	0	1	1.358490566	BLANK
1320	0	2	1	2.655405405	BLANK
1321	0	0	1	4.816091954	BLANK
1322	0	6	1	12.5952381	BLANK
1323	0	9	1	5.17721519	BLANK
1324	0	9	1	5.086419753	4
1325	0	0	0	28.30769231	BLANK
1326	0	5	0	45.69444444	BLANK
1327	0	7	0	48.86111111	BLANK
1328	0	0	0	4.295238095	BLANK
1329	0	0	1	7.723684211	BLANK
1330	0	1	1	6.288288288	BLANK
1331	0	5	1	6.021505376	BLANK
1332	0	5	1	6.131868132	9
1333	0	8	1	19.42028986	8
1334	0	9	1	22.45	13
1335	0	10	1	27.875	12
1336	0	10	1	29.90196078	14
1337	0	11	1	29.796875	17
1338	0	12	1	16.05405405	7
1339	0	13	1	16.70666667	8
1340	0	0	0	3.566037736	BLANK
1341	0	1	0	3.557692308	BLANK
1342	0	0	0	7.023809524	BLANK
1343	0	0	0	3.555555556	BLANK
1344	0	0	0	5.045977011	BLANK
1345	0	0	0	4.72027972	BLANK
1346	0	0	0	4.041666667	BLANK
1347	0	0	0	12.82758621	BLANK
1348	0	0	0	8.445783133	BLANK
1349	0	0	0	7	BLANK
1350	0	2	0	4.348214286	BLANK
1351	0	0	1	8.058441558	BLANK
1352	0	0	1	14.5	BLANK
1353	0	1	1	11.35051546	8
1354	0	2	1	6.746376812	10
1355	0	3	1	7.426470588	11
1356	0	4	1	10.90425532	19
1357	0	5	1	15.44927536	20
1358	0	6	1	14.57894737	16
1359	0	7	1	7.81981982	16
1360	0	8	1	7.683673469	13
1361	0	9	1	4.945205479	12
1362	0	10	1	9.518072289	13
1363	0	11	1	4.025773196	8
1364	0	12	1	6.701219512	8
1365	0	13	1	9.081481481	14
1366	0	0	0	2.935483871	BLANK
1367	0	0	0	5.352459016	BLANK
1368	0	1	0	5.904347826	2
1369	0	0	0	3.477272727	BLANK
1370	0	3	0	6.452173913	BLANK
1371	0	0	1	14.72727273	BLANK
1372	0	1	1	19.015625	BLANK
1373	0	2	1	17	10
1374	0	3	1	10.11578947	9
1375	0	4	1	8.580645161	BLANK
1376	0	5	1	8.838709677	BLANK
1377	0	0	0	10.33333333	BLANK
1378	0	7	0	26.22222222	BLANK
1379	0	0	0	5.504065041	BLANK
1380	0	0	0	5.269230769	0
1381	0	0	0	7.195876289	BLANK
1382	0	0	1	3.917808219	BLANK
1383	0	0	0	3.362068966	BLANK
1384	0	0	1	23.55555556	11
1385	0	1	1	28.51851852	11
1386	0	2	1	35.65909091	10
1387	0	3	1	31.6	9
1388	0	4	1	13	6
1389	0	0	0	6.53125	BLANK
1390	0	0	0	9.208333333	BLANK
1391	0	0	0	1.96692112	BLANK
1392	0	0	0	33.11111111	BLANK
1393	0	1	0	26.18518519	9
1394	0	4	0	6.964285714	BLANK
1395	0	0	0	6.421686747	BLANK
1396	0	0	1	3.45	BLANK
1397	0	4	1	8.152173913	BLANK
1398	0	0	1	6.415584416	BLANK
1399	0	0	0	2.447674419	BLANK
1400	0	2	0	1.946428571	BLANK
1401	0	0	0	6.603174603	BLANK
1402	0	2	0	8.73015873	BLANK
1403	0	0	0	3.5	BLANK
1404	0	0	0	8.434782609	BLANK
1405	0	0	0	3.376344086	BLANK
1406	0	2	1	9.215384615	BLANK
1407	0	4	1	16.14035088	BLANK
1408	0	6	1	19.11842105	7
1409	0	0	0	4.666666667	BLANK
1410	0	0	0	4.540145985	1
1411	0	0	1	8.379310345	BLANK
1412	0	3	1	9.134020619	BLANK
1413	0	7	1	8.55	BLANK
1414	0	2	0	4.515151515	0
1415	0	3	0	3.691588785	0
1416	0	9	0	7.609090909	3
1417	0	1	1	3.186046512	0
1418	0	1	1	4.95754717	0
1419	0	7	0	12.88571429	2
1420	0	11	1	3.589595376	2
1421	0	6	0	5.29245283	7
1422	0	3	0	2.442424242	0
1423	0	1	1	10.65306122	2
1424	0	2	0	4.117021277	0
1425	0	2	0	3.859296482	1
1426	0	5	0	4.760299625	3
1427	0	13	0	2.237864078	0
1428	0	13	0	1.32183908	4
1429	0	1	1	3.123595506	2
1430	0	3	0	4.416666667	0
1431	0	3	0	5.833333333	1
1432	0	11	1	10.30701754	7
1433	0	10	0	2.837209302	0
1434	0	6	0	2.993150685	2
1435	0	4	0	27.40909091	4
1436	0	5	0	6.357664234	0
1437	0	5	0	5.908571429	0
1438	0	5	0	15.37614679	5
1439	0	5	0	22.04301075	6
1440	0	3	0	5.086956522	0
1441	0	1	0	3.521367521	0
1442	0	1	0	7.857142857	5
1443	0	4	0	6.852272727	4
1444	0	1	1	8.538461538	8
1445	0	1	1	6.897196262	0
1446	0	1	1	3.010416667	2
1447	0	1	1	4.261538462	1
1448	0	3	1	8.1	5
1449	0	5	0	29.39473684	4
1450	0	12	1	3.384615385	4
1451	0	12	0	1.708333333	0
1452	0	13	0	10.3030303	1
1453	0	13	0	40.07692308	7
1454	0	1	0	4.47706422	0
1455	0	7	0	14.14285714	6
1456	0	1	1	3.779816514	2
1457	0	1	1	9.282828283	6
1458	0	5	0	2.119047619	6
1459	0	4	0	9.756410256	5
1460	0	4	0	3.276923077	1
1461	0	1	1	7.053571429	5
1462	0	4	0	10.78947368	5
1463	0	1	1	8.509259259	7
1464	0	6	0	3.400990099	0
1465	0	1	1	2.630252101	2
1466	0	2	1	2.98245614	0
1467	0	1	1	9.688073394	6
1468	0	1	1	20.73333333	10
1469	0	4	0	4.146341463	0
1470	0	8	0	6.113924051	2
1471	0	1	1	5.24691358	1
1472	0	1	1	5.566666667	2
1473	0	1	1	7.170731707	4
1474	0	1	1	11.13636364	4
1475	0	1	0	10.41666667	3
1476	0	1	0	30.48148148	13
1477	0	9	0	4.954545455	4
1478	0	6	0	1.191637631	1
1479	0	5	0	7.323076923	1
1480	0	6	0	7.126213592	4
1481	0	1	1	5.430555556	5
1482	0	3	0	3.441860465	1
1483	0	1	1	14.375	3
1484	0	1	1	24.12820513	8
1485	0	3	0	2.294117647	2
1486	0	6	0	1.73015873	1
1487	0	4	0	9.813559322	5
1488	0	1	0	2.906666667	1
1489	0	2	0	5.757575758	2
1490	0	12	0	3.867549669	0
1491	0	1	1	11.73134328	7
1492	0	2	0	4.434782609	2
1493	0	3	0	7.833333333	1
1494	0	1	1	3.72	1
1495	0	1	1	16.72340426	8
1496	0	1	1	7.483870968	1
1497	0	1	0	13.20454545	3
1498	0	1	1	25.67741935	7
1499	0	1	0	1.982142857	6
1500	0	13	0	5.746478873	5
1501	0	5	0	4.046783626	2
1502	0	6	0	5.698630137	3
1503	0	6	0	6.142857143	1
1504	0	5	0	2.651685393	0
1505	0	8	0	5.056338028	0
1506	0	8	0	3.646153846	6
1507	0	8	0	5.459677419	5
1508	0	1	1	8.166666667	4
1509	0	1	1	5.321428571	0
1510	0	6	1	7.670886076	5
1511	0	1	1	6.678571429	2
1512	0	3	0	9.98019802	2
1513	0	3	0	1.341269841	0
1514	0	6	0	4.416666667	0
1515	0	1	1	7.471264368	6
1516	0	9	1	12.61842105	4
1517	0	1	0	6.722222222	1
1518	0	3	0	6.819444444	1
