# Supplementary material for: A novel haemocytometric COVID-19 prognostic score developed and validated in an observational multicentre European hospital-based study
Source: eLife journal article supplement (doi:10.7554/elife.63195), 2020-11-26
Supplement: supp [file elife-63195-supp-v1.zip › elife_poa_e63195_Source_data_1.xlsx]

## Sheet: FigS2_metadata
Filename	exclusion	Center	Pat_ID	Baseline	date_of_hospitalisation	length_of_hospitalisation	total length_of_hospitalisation	First week hospital	date_of_COVID_confirmation	Sex	sex_numerical	age	days_of_symptoms_before_measurement	days symptoms clusterd new	days symptoms clusterd	First week symptoms	not_hospitalized	hospitalized	ventilatory_assistance	status changed?	ICU_added_info	severity index	severity_numerical	IC unit	Severity-1	Severity-2	OTHER VIRUS	SYMPTOMS	COMORBIDITY	comorbidity_exists	Cardiovascular problems	hypertension	Diabetis	Malignancy	Lung problems	Kidney disease	ZNS/cognitive disorders	auto immun disease	OBESITY	Haematological Disorder/Malignancy	pregnancy	other	developed_sepsis	FEVER (days)	DISMISSED	DIED/outome	Mortality	Critical_or_Fatal	ICU ventilation
1	0	Center_01	1	1	2020-03-22	0	16	1	2020-03-23	M	1	58	7	7	8	1	0	1	0	1	blank	4.Critical/Fatal	4	1	1	1	blank	blank	censored	1	0	1	0	0	0	0	0	0	0	0	0	0	0	blank	2020-04-07	0	0	1	1
2	0	Center_01	1	0	2020-03-22	2	16	1	2020-03-23	M	1	58	9	9	10	0	0	0	1	1	blank	4.Critical/Fatal	4	1	1	1	blank	blank	censored	1	0	1	0	0	0	0	0	0	0	0	0	0	0	blank	2020-04-07	0	0	1	1
3	0	Center_01	1	0	2020-03-22	2	16	1	2020-03-23	M	1	58	9	9	10	0	0	0	1	1	blank	4.Critical/Fatal	4	1	1	1	blank	blank	censored	1	0	1	0	0	0	0	0	0	0	0	0	0	0	blank	2020-04-07	0	0	1	1
4	0	Center_01	1	0	2020-03-22	3	16	1	2020-03-23	M	1	58	10	10	10	0	0	0	1	1	blank	4.Critical/Fatal	4	1	1	1	blank	blank	censored	1	0	1	0	0	0	0	0	0	0	0	0	0	0	blank	2020-04-07	0	0	1	1
5	0	Center_01	1	0	2020-03-22	4	16	1	2020-03-23	M	1	58	11	11	12	0	0	0	1	1	blank	4.Critical/Fatal	4	1	1	1	blank	blank	censored	1	0	1	0	0	0	0	0	0	0	0	0	0	0	blank	2020-04-07	0	0	1	1
6	0	Center_01	1	0	2020-03-22	15	16	0	2020-03-23	M	1	58	22	22	22	0	0	0	1	1	blank	4.Critical/Fatal	4	1	1	1	blank	blank	censored	1	0	1	0	0	0	0	0	0	0	0	0	0	0	blank	2020-04-07	0	0	1	1
7	0	Center_01	2	1	2020-03-26	0	6	1	2020-03-26	M	1	51	10	10	10	0	0	1	0	0	blank	3.Severe	3	0	0	1	blank	blank		0	0	0	0	0	0	0	0	0	0	0	0	0	0	#N/A	2020-04-01	0	0	0	0
8	0	Center_01	2	0	2020-03-26	1	6	1	2020-03-26	M	1	51	11	11	12	0	0	1	0	0	blank	3.Severe	3	0	0	1	blank	blank		0	0	0	0	0	0	0	0	0	0	0	0	0	0	#N/A	2020-04-01	0	0	0	0
9	0	Center_01	2	0	2020-03-26	2	6	1	2020-03-26	M	1	51	12	12	12	0	0	1	0	0	blank	3.Severe	3	0	0	1	blank	blank		0	0	0	0	0	0	0	0	0	0	0	0	0	0	#N/A	2020-04-01	0	0	0	0
10	0	Center_01	2	0	2020-03-26	3	6	1	2020-03-26	M	1	51	13	13	14	0	0	1	0	0	blank	3.Severe	3	0	0	1	blank	blank		0	0	0	0	0	0	0	0	0	0	0	0	0	0	#N/A	2020-04-01	0	0	0	0
11	0	Center_01	2	0	2020-03-26	4	6	1	2020-03-26	M	1	51	14	14	14	0	0	1	0	0	blank	3.Severe	3	0	0	1	blank	blank		0	0	0	0	0	0	0	0	0	0	0	0	0	0	#N/A	2020-04-01	0	0	0	0
12	0	Center_01	2	0	2020-03-26	6	6	1	2020-03-26	M	1	51	16	16	16	0	0	1	0	0	blank	3.Severe	3	0	0	1	blank	blank		0	0	0	0	0	0	0	0	0	0	0	0	0	0	#N/A	2020-04-01	0	0	0	0
13	0	Center_01	3	1	2020-03-24	0	30	1	2020-03-24	M	1	51	9	9	10	0	0	1	0	1	blank	4.Critical/Fatal	4	1	1	1	blank	blank	censored	1	0	0	0	0	0	0	0	1	0	0	0	1	0	blank	2020-04-23	0	0	1	1
14	0	Center_01	3	0	2020-03-24	1	30	1	2020-03-24	M	1	51	10	10	10	0	0	1	0	1	blank	4.Critical/Fatal	4	1	1	1	blank	blank	censored	1	0	0	0	0	0	0	0	1	0	0	0	1	0	blank	2020-04-23	0	0	1	1
15	0	Center_01	3	0	2020-03-24	1	30	1	2020-03-24	M	1	51	10	10	10	0	0	1	0	1	blank	4.Critical/Fatal	4	1	1	1	blank	blank	censored	1	0	0	0	0	0	0	0	1	0	0	0	1	0	blank	2020-04-23	0	0	1	1
16	0	Center_01	3	0	2020-03-24	2	30	1	2020-03-24	M	1	51	11	11	12	0	0	0	1	1	blank	4.Critical/Fatal	4	1	1	1	blank	blank	censored	1	0	0	0	0	0	0	0	1	0	0	0	1	0	blank	2020-04-23	0	0	1	1
17	0	Center_01	3	0	2020-03-24	3	30	1	2020-03-24	M	1	51	12	12	12	0	0	0	1	1	blank	4.Critical/Fatal	4	1	1	1	blank	blank	no info	1	0	0	0	0	0	0	0	0	0	0	0	0	0	blank	2020-04-23	0	0	1	1
18	0	Center_01	3	0	2020-03-24	4	30	1	2020-03-24	M	1	51	13	13	14	0	0	0	1	1	blank	4.Critical/Fatal	4	1	1	1	blank	blank	no info	1	0	0	0	0	0	0	0	0	0	0	0	0	0	blank	2020-04-23	0	0	1	1
19	0	Center_01	3	0	2020-03-24	4	30	1	2020-03-24	M	1	51	13	13	14	0	0	0	1	1	blank	4.Critical/Fatal	4	1	1	1	blank	blank	no info	1	0	0	0	0	0	0	0	0	0	0	0	0	0	blank	2020-04-23	0	0	1	1
20	0	Center_01	3	0	2020-03-24	5	30	1	2020-03-24	M	1	51	14	14	14	0	0	0	1	1	blank	4.Critical/Fatal	4	1	1	1	blank	blank	no info	1	0	0	0	0	0	0	0	0	0	0	0	0	0	blank	2020-04-23	0	0	1	1
21	0	Center_01	3	0	2020-03-24	6	30	1	2020-03-24	M	1	51	15	16	16	0	0	0	1	1	blank	4.Critical/Fatal	4	1	1	1	blank	blank	no info	1	0	0	0	0	0	0	0	0	0	0	0	0	0	blank	2020-04-23	0	0	1	1
22	0	Center_01	3	0	2020-03-24	7	30	1	2020-03-24	M	1	51	16	16	16	0	0	0	1	1	blank	4.Critical/Fatal	4	1	1	1	blank	blank	no info	1	0	0	0	0	0	0	0	0	0	0	0	0	0	blank	2020-04-23	0	0	1	1
23	0	Center_01	3	0	2020-03-24	8	30	0	2020-03-24	M	1	51	17	18	18	0	0	0	1	1	blank	4.Critical/Fatal	4	1	1	1	blank	blank	no info	1	0	0	0	0	0	0	0	0	0	0	0	0	0	blank	2020-04-23	0	0	1	1
24	0	Center_01	3	0	2020-03-24	9	30	0	2020-03-24	M	1	51	18	18	18	0	0	0	1	1	blank	4.Critical/Fatal	4	1	1	1	blank	blank	no info	1	0	0	0	0	0	0	0	0	0	0	0	0	0	blank	2020-04-23	0	0	1	1
25	0	Center_01	3	0	2020-03-24	10	30	0	2020-03-24	M	1	51	19	20	20	0	0	0	1	1	blank	4.Critical/Fatal	4	1	1	1	blank	blank	no info	1	0	0	0	0	0	0	0	0	0	0	0	0	0	blank	2020-04-23	0	0	1	1
26	0	Center_01	3	0	2020-03-24	11	30	0	2020-03-24	M	1	51	20	20	20	0	0	0	1	1	blank	4.Critical/Fatal	4	1	1	1	blank	blank	no info	1	0	0	0	0	0	0	0	0	0	0	0	0	0	blank	2020-04-23	0	0	1	1
27	0	Center_01	3	0	2020-03-24	12	30	0	2020-03-24	M	1	51	21	22	22	0	0	0	1	1	blank	4.Critical/Fatal	4	1	1	1	blank	blank	no info	1	0	0	0	0	0	0	0	0	0	0	0	0	0	blank	2020-04-23	0	0	1	1
28	0	Center_01	3	0	2020-03-24	13	30	0	2020-03-24	M	1	51	22	22	22	0	0	0	1	1	blank	4.Critical/Fatal	4	1	1	1	blank	blank	no info	1	0	0	0	0	0	0	0	0	0	0	0	0	0	blank	2020-04-23	0	0	1	1
29	0	Center_01	4	1	2020-03-23	0	21	1	2020-03-23	F	0	74	10	10	10	0	0	1	0	1	blank	4.Critical/Fatal	5	1	1	1	blank	blank	censored	1	0	1	0	0	0	1	0	0	0	0	0	0	1	blank		2020-04-13	1	1	1
30	0	Center_01	4	0	2020-03-23	1	21	1	2020-03-23	F	0	74	11	11	12	0	0	0	1	1	blank	4.Critical/Fatal	5	1	1	1	blank	blank	censored	1	0	1	0	0	0	1	0	0	0	0	0	0	1	blank		2020-04-13	1	1	1
31	0	Center_01	4	0	2020-03-23	1	21	1	2020-03-23	F	0	74	11	11	12	0	0	0	1	1	blank	4.Critical/Fatal	5	1	1	1	blank	blank	censored	1	0	1	0	0	0	1	0	0	0	0	0	0	1	blank		2020-04-13	1	1	1
32	0	Center_01	4	0	2020-03-23	2	21	1	2020-03-23	F	0	74	12	12	12	0	0	0	1	1	blank	4.Critical/Fatal	5	1	1	1	blank	blank	censored	1	0	1	0	0	0	1	0	0	0	0	0	0	1	blank		2020-04-13	1	1	1
33	0	Center_01	4	0	2020-03-23	3	21	1	2020-03-23	F	0	74	13	13	14	0	0	0	1	1	blank	4.Critical/Fatal	5	1	1	1	blank	blank	censored	1	0	1	0	0	0	1	0	0	0	0	0	0	1	blank		2020-04-13	1	1	1
34	0	Center_01	4	0	2020-03-23	4	21	1	2020-03-23	F	0	74	14	14	14	0	0	0	1	1	blank	4.Critical/Fatal	5	1	1	1	blank	blank	no info	1	0	0	0	0	0	0	0	0	0	0	0	0	0	blank		2020-04-13	1	1	1
35	0	Center_01	4	0	2020-03-23	5	21	1	2020-03-23	F	0	74	15	16	16	0	0	0	1	1	blank	4.Critical/Fatal	5	1	1	1	blank	blank	no info	1	0	0	0	0	0	0	0	0	0	0	0	0	0	blank		2020-04-13	1	1	1
36	0	Center_01	4	0	2020-03-23	6	21	1	2020-03-23	F	0	74	16	16	16	0	0	0	1	1	blank	4.Critical/Fatal	5	1	1	1	blank	blank	no info	1	0	0	0	0	0	0	0	0	0	0	0	0	0	blank		2020-04-13	1	1	1
37	0	Center_01	4	0	2020-03-23	7	21	1	2020-03-23	F	0	74	17	18	18	0	0	0	1	1	blank	4.Critical/Fatal	5	1	1	1	blank	blank	no info	1	0	0	0	0	0	0	0	0	0	0	0	0	0	blank		2020-04-13	1	1	1
38	0	Center_01	4	0	2020-03-23	8	21	0	2020-03-23	F	0	74	18	18	18	0	0	0	1	1	blank	4.Critical/Fatal	5	1	1	1	blank	blank	no info	1	0	0	0	0	0	0	0	0	0	0	0	0	0	blank		2020-04-13	1	1	1
39	0	Center_01	4	0	2020-03-23	9	21	0	2020-03-23	F	0	74	19	20	20	0	0	0	1	1	blank	4.Critical/Fatal	5	1	1	1	blank	blank	no info	1	0	0	0	0	0	0	0	0	0	0	0	0	0	blank		2020-04-13	1	1	1
40	0	Center_01	4	0	2020-03-23	10	21	0	2020-03-23	F	0	74	20	20	20	0	0	0	1	1	blank	4.Critical/Fatal	5	1	1	1	blank	blank	no info	1	0	0	0	0	0	0	0	0	0	0	0	0	0	blank		2020-04-13	1	1	1
41	0	Center_01	4	0	2020-03-23	10	21	0	2020-03-23	F	0	74	20	20	20	0	0	0	1	1	blank	4.Critical/Fatal	5	1	1	1	blank	blank	no info	1	0	0	0	0	0	0	0	0	0	0	0	0	0	blank		2020-04-13	1	1	1
42	0	Center_01	4	0	2020-03-23	11	21	0	2020-03-23	F	0	74	21	22	22	0	0	0	1	1	blank	4.Critical/Fatal	5	1	1	1	blank	blank	no info	1	0	0	0	0	0	0	0	0	0	0	0	0	0	blank		2020-04-13	1	1	1
43	0	Center_01	4	0	2020-03-23	12	21	0	2020-03-23	F	0	74	22	22	22	0	0	0	1	1	blank	4.Critical/Fatal	5	1	1	1	blank	blank	no info	1	0	0	0	0	0	0	0	0	0	0	0	0	0	blank		2020-04-13	1	1	1
44	0	Center_01	4	0	2020-03-23	13	21	0	2020-03-23	F	0	74	23	24	24	0	0	0	1	1	blank	4.Critical/Fatal	5	1	1	1	blank	blank	no info	1	0	0	0	0	0	0	0	0	0	0	0	0	0	blank		2020-04-13	1	1	1
45	0	Center_01	4	0	2020-03-23	14	21	0	2020-03-23	F	0	74	24	24	24	0	0	0	1	1	blank	4.Critical/Fatal	5	1	1	1	blank	blank	no info	1	0	0	0	0	0	0	0	0	0	0	0	0	0	blank		2020-04-13	1	1	1
46	0	Center_01	5	1	2020-03-24	0	13	1	2020-03-24	F	0	66	14	14	14	0	0	1	0	0	blank	3.Severe	3	0	0	1	blank	blank	censored	1	1	0	0	0	1	0	0	0	0	0	0	1	0	blank	2020-04-06	0	0	0	0
47	0	Center_01	5	0	2020-03-24	1	13	1	2020-03-24	F	0	66	15	16	16	0	0	1	0	0	blank	3.Severe	3	0	0	1	blank	blank	censored	1	1	0	0	0	1	0	0	0	0	0	0	1	0	blank	2020-04-06	0	0	0	0
48	0	Center_01	6	1	2020-03-18	0	8	1	2020-03-18	F	0	55	8	8	8	0	0	1	0	0	blank	3.Severe	3	0	0	1	blank	blank	0	0	0	0	0	0	0	0	0	0	0	0	0	0	0	blank	2020-03-26	0	0	0	0
49	0	Center_01	6	0	2020-03-18	2	8	1	2020-03-18	F	0	55	10	10	10	0	0	1	0	0	blank	3.Severe	3	0	0	1	blank	blank	0	0	0	0	0	0	0	0	0	0	0	0	0	0	0	blank	2020-03-26	0	0	0	0
50	0	Center_01	6	0	2020-03-18	3	8	1	2020-03-18	F	0	55	11	11	12	0	0	1	0	0	blank	3.Severe	3	0	0	1	blank	blank	0	0	0	0	0	0	0	0	0	0	0	0	0	0	0	blank	2020-03-26	0	0	0	0
51	0	Center_01	6	0	2020-03-18	5	8	1	2020-03-18	F	0	55	13	13	14	0	0	1	0	0	blank	3.Severe	3	0	0	1	blank	blank	0	0	0	0	0	0	0	0	0	0	0	0	0	0	0	blank	2020-03-26	0	0	0	0
52	0	Center_01	7	1	2020-03-17	0	9	1	2020-03-17	F	0	58	7	7	8	1	0	1	0	0	blank	3.Severe	3	0	0	1	blank	blank	0	0	0	0	0	0	0	0	0	0	0	0	0	0	0	blank	2020-03-26	0	0	0	0
53	0	Center_01	7	0	2020-03-17	2	9	1	2020-03-17	F	0	58	9	9	10	0	0	1	0	0	blank	3.Severe	3	0	0	1	blank	blank	0	0	0	0	0	0	0	0	0	0	0	0	0	0	0	blank	2020-03-26	0	0	0	0
54	0	Center_01	7	0	2020-03-17	3	9	1	2020-03-17	F	0	58	10	10	10	0	0	1	0	0	blank	3.Severe	3	0	0	1	blank	blank	0	0	0	0	0	0	0	0	0	0	0	0	0	0	0	blank	2020-03-26	0	0	0	0
55	0	Center_01	7	0	2020-03-17	4	9	1	2020-03-17	F	0	58	11	11	12	0	0	1	0	0	blank	3.Severe	3	0	0	1	blank	blank	0	0	0	0	0	0	0	0	0	0	0	0	0	0	0	blank	2020-03-26	0	0	0	0
56	0	Center_01	7	0	2020-03-17	5	9	1	2020-03-17	F	0	58	12	12	12	0	0	1	0	0	blank	3.Severe	3	0	0	1	blank	blank	0	0	0	0	0	0	0	0	0	0	0	0	0	0	0	blank	2020-03-26	0	0	0	0
57	0	Center_01	7	0	2020-03-17	6	9	1	2020-03-17	F	0	58	13	13	14	0	0	1	0	0	blank	3.Severe	3	0	0	1	blank	blank	0	0	0	0	0	0	0	0	0	0	0	0	0	0	0	blank	2020-03-26	0	0	0	0
58	0	Center_01	8	1	2020-03-16	1	1	1	2020-03-16	F	0	39	4	4	4	1	0	1	0	0	blank	2.Moderate	2	0	0	0	blank	blank	0	0	0	0	0	0	0	0	0	0	0	0	0	0	0	blank	nvt	0	0	0	0
59	0	Center_01	9	1	2020-03-18	0	7	1	2020-03-18	M	1	74	10	10	10	0	0	1	0	0	blank	3.Severe	3	0	0	1	blank	blank	censored	1	0	1	0	0	0	1	0	0	0	0	0	0	0	blank	2020-03-25	0	0	0	0
60	0	Center_01	9	0	2020-03-18	2	7	1	2020-03-18	M	1	74	12	12	12	0	0	1	0	0	blank	3.Severe	3	0	0	1	blank	blank	censored	1	0	1	0	0	0	1	0	0	0	0	0	0	0	blank	2020-03-25	0	0	0	0
61	0	Center_01	9	0	2020-03-18	3	7	1	2020-03-18	M	1	74	13	13	14	0	0	1	0	0	blank	3.Severe	3	0	0	1	blank	blank	censored	1	0	1	0	0	0	1	0	0	0	0	0	0	0	blank	2020-03-25	0	0	0	0
62	0	Center_01	9	0	2020-03-18	4	7	1	2020-03-18	M	1	74	14	14	14	0	0	1	0	0	blank	3.Severe	3	0	0	1	blank	blank	censored	1	0	1	0	0	0	1	0	0	0	0	0	0	0	blank	2020-03-25	0	0	0	0
63	0	Center_01	9	0	2020-03-18	5	7	1	2020-03-18	M	1	74	15	16	16	0	0	1	0	0	blank	3.Severe	3	0	0	1	blank	blank	censored	1	0	1	0	0	0	1	0	0	0	0	0	0	0	blank	2020-03-25	0	0	0	0
64	0	Center_01	9	0	2020-03-18	7	7	1	2020-03-18	M	1	74	17	18	18	0	0	1	0	0	blank	3.Severe	3	0	0	1	blank	blank	censored	1	0	1	0	0	0	1	0	0	0	0	0	0	0	blank	2020-03-25	0	0	0	0
65	0	Center_01	10	1	2020-03-22	0	58	1	2020-03-23	M	1	73	14	14	14	0	0	1	0	1	blank	4.Critical/Fatal	4	1	1	1	blank	blank	censored	1	0	0	0	0	0	0	0	0	0	1	0	1	0	blank	2020-05-19	0	0	1	1
66	0	Center_01	10	0	2020-03-22	1	58	1	2020-03-23	M	1	73	15	16	16	0	0	1	0	1	blank	4.Critical/Fatal	4	1	1	1	blank	blank	censored	1	0	0	0	0	0	0	0	0	0	1	0	1	0	blank	2020-05-19	0	0	1	1
67	0	Center_01	10	0	2020-03-22	3	58	1	2020-03-23	M	1	73	17	18	18	0	0	1	0	1	blank	4.Critical/Fatal	4	1	1	1	blank	blank	censored	1	0	0	0	0	0	0	0	0	0	1	0	1	0	blank	2020-05-19	0	0	1	1
68	0	Center_01	10	0	2020-03-22	4	58	1	2020-03-23	M	1	73	18	18	18	0	0	0	1	1	blank	4.Critical/Fatal	4	1	1	1	blank	blank	censored	1	0	0	0	0	0	0	0	0	0	1	0	1	0	blank	2020-05-19	0	0	1	1
69	0	Center_01	11	1	2020-03-23	0	4	1	2020-03-23	F	0	64	7	7	8	1	0	1	0	0	blank	2.Moderate	2	0	0	0	blank	blank	censored	1	0	1	0	0	0	1	0	0	0	0	0	0	0	blank	2020-03-27	0	0	0	0
70	0	Center_01	11	0	2020-03-23	1	4	1	2020-03-23	F	0	64	8	8	8	0	0	1	0	0	blank	2.Moderate	2	0	0	0	blank	blank	censored	1	0	1	0	0	0	1	0	0	0	0	0	0	0	blank	2020-03-27	0	0	0	0
71	0	Center_01	11	0	2020-03-23	3	4	1	2020-03-23	F	0	64	10	10	10	0	0	1	0	0	blank	2.Moderate	2	0	0	0	blank	blank	censored	1	0	1	0	0	0	1	0	0	0	0	0	0	0	blank	2020-03-27	0	0	0	0
72	0	Center_01	12	1	2020-03-23	0	9	1	2020-03-23	M	1	62	8	8	8	0	0	1	0	0	blank	4.Critical/Fatal	5	1	1	1	blank	blank	censored	1	0	0	0	1	1	0	0	0	0	0	0	0	0	blank		2020-04-01	1	1	1
73	0	Center_01	12	0	2020-03-23	2	9	1	2020-03-23	M	1	62	10	10	10	0	0	1	0	0	blank	4.Critical/Fatal	5	1	1	1	blank	blank	censored	1	0	0	0	1	1	0	0	0	0	0	0	0	0	blank		2020-04-01	1	1	1
74	0	Center_01	13	1	2020-03-13	5	27	1	2020-03-13	M	1	42	13	13	14	0	0	0	1	1	ECMO	4.Critical/Fatal	5	1	1	1	blank	blank	censored	1	0	0	0	0	0	0	0	0	0	0	0	1	0	blank		2020-04-01	1	1	1
75	0	Center_01	13	0	2020-03-13	6	27	1	2020-03-13	M	1	42	14	14	14	0	0	0	1	1	ECMO	4.Critical/Fatal	5	1	1	1	blank	blank	censored	1	0	0	0	0	0	0	0	0	0	0	0	1	0	blank		2020-04-01	1	1	1
76	0	Center_01	13	0	2020-03-13	7	27	1	2020-03-13	M	1	42	15	16	16	0	0	0	1	1	ECMO	4.Critical/Fatal	5	1	1	1	blank	blank	censored	1	0	0	0	0	0	0	0	0	0	0	0	1	0	blank		2020-04-01	1	1	1
77	0	Center_01	13	0	2020-03-13	8	27	0	2020-03-13	M	1	42	16	16	16	0	0	0	1	1	ECMO	4.Critical/Fatal	5	1	1	1	blank	blank	censored	1	0	0	0	0	0	0	0	0	0	0	0	1	0	blank		2020-04-01	1	1	1
78	0	Center_01	13	0	2020-03-13	9	27	0	2020-03-13	M	1	42	17	18	18	0	0	0	1	1	ECMO	4.Critical/Fatal	5	1	1	1	blank	blank	censored	1	0	0	0	0	0	0	0	0	0	0	0	1	0	blank		2020-04-01	1	1	1
79	0	Center_01	13	0	2020-03-13	9	27	0	2020-03-13	M	1	42	17	18	18	0	0	0	1	1	ECMO	4.Critical/Fatal	5	1	1	1	blank	blank	censored	1	0	0	0	0	0	0	0	0	0	0	0	1	0	blank		2020-04-01	1	1	1
80	0	Center_01	13	0	2020-03-13	10	27	0	2020-03-13	M	1	42	18	18	18	0	0	0	1	1	ECMO	4.Critical/Fatal	5	1	1	1	blank	blank	censored	1	0	0	0	0	0	0	0	0	0	0	0	1	0	blank		2020-04-01	1	1	1
81	0	Center_01	13	0	2020-03-13	11	27	0	2020-03-13	M	1	42	19	20	20	0	0	0	1	1	blank	4.Critical/Fatal	5	1	1	1	blank	blank	censored	1	0	0	0	0	0	0	0	0	0	0	0	1	0	blank		2020-04-01	1	1	1
82	0	Center_01	13	0	2020-03-13	12	27	0	2020-03-13	M	1	42	20	20	20	0	0	0	1	1	blank	4.Critical/Fatal	5	1	1	1	blank	blank	censored	1	0	0	0	0	0	0	0	0	0	0	0	1	0	blank		2020-04-01	1	1	1
83	0	Center_01	13	0	2020-03-13	13	27	0	2020-03-13	M	1	42	21	22	22	0	0	0	1	1	blank	4.Critical/Fatal	5	1	1	1	blank	blank	censored	1	0	0	0	0	0	0	0	0	0	0	0	1	0	blank		2020-04-01	1	1	1
84	0	Center_01	14	1	2020-03-16	1	1	1	2020-03-16	M	1	34	1	1	2	1	0	1	0	0	blank	2.Moderate	2	0	0	0	blank	blank	censored	1	0	0	0	0	0	1	0	0	0	0	0	0	0	blank	2020-03-17	0	0	0	0
85	0	Center_01	15	1	2020-03-05	13	40	0	2020-03-05	M	1	63	5	5	6	1	0	0	1	1	blank	4.Critical/Fatal	4	1	1	1	blank	blank	censored	1	0	0	1	0	0	1	0	0	1	0	0	0	0	blank	2020-04-14	0	0	1	1
86	0	Center_01	15	0	2020-03-05	14	40	0	2020-03-05	M	1	63	6	6	6	1	0	0	1	1	blank	4.Critical/Fatal	4	1	1	1	blank	blank	censored	1	0	0	1	0	0	1	0	0	1	0	0	0	0	blank	2020-04-14	0	0	1	1
87	0	Center_01	15	0	2020-03-05	15	40	0	2020-03-05	M	1	63	7	7	8	1	0	0	1	1	blank	4.Critical/Fatal	4	1	1	1	blank	blank	censored	1	0	0	1	0	0	1	0	0	1	0	0	0	0	blank	2020-04-14	0	0	1	1
88	0	Center_01	15	0	2020-03-05	16	40	0	2020-03-05	M	1	63	8	8	8	0	0	0	1	1	blank	4.Critical/Fatal	4	1	1	1	blank	blank	censored	1	0	0	1	0	0	1	0	0	1	0	0	0	0	blank	2020-04-14	0	0	1	1
89	0	Center_01	15	0	2020-03-05	17	40	0	2020-03-05	M	1	63	9	9	10	0	0	0	1	1	ECMO	4.Critical/Fatal	4	1	1	1	blank	blank	censored	1	0	0	1	0	0	1	0	0	1	0	0	0	0	blank	2020-04-14	0	0	1	1
90	0	Center_01	15	0	2020-03-05	18	40	0	2020-03-05	M	1	63	10	10	10	0	0	0	1	1	blank	4.Critical/Fatal	4	1	1	1	blank	blank	censored	1	0	0	1	0	0	1	0	0	1	0	0	0	0	blank	2020-04-14	0	0	1	1
91	0	Center_01	15	0	2020-03-05	19	40	0	2020-03-05	M	1	63	11	11	12	0	0	0	1	1	blank	4.Critical/Fatal	4	1	1	1	blank	blank	censored	1	0	0	1	0	0	1	0	0	1	0	0	0	0	blank	2020-04-14	0	0	1	1
92	0	Center_01	15	0	2020-03-05	20	40	0	2020-03-05	M	1	63	12	12	12	0	0	1	0	1	blank	4.Critical/Fatal	4	1	1	1	blank	blank	censored	1	0	0	1	0	0	1	0	0	1	0	0	0	0	blank	2020-04-14	0	0	1	1
93	0	Center_01	16	1	2020-03-07	11	58	0	2020-03-06	M	1	80	14	14	14	0	0	0	1	1	blank	4.Critical/Fatal	4	1	1	1	blank	blank	censored	1	1	0	0	1	0	0	0	0	0	0	0	0	0	blank	2020-05-04	0	0	1	1
94	0	Center_01	16	0	2020-03-07	12	58	0	2020-03-06	M	1	80	15	16	16	0	0	0	1	1	blank	4.Critical/Fatal	4	1	1	1	blank	blank	censored	1	1	0	0	1	0	0	0	0	0	0	0	0	0	blank	2020-05-04	0	0	1	1
95	0	Center_01	16	0	2020-03-07	13	58	0	2020-03-06	M	1	80	16	16	16	0	0	0	1	1	blank	4.Critical/Fatal	4	1	1	1	blank	blank	censored	1	1	0	0	1	0	0	0	0	0	0	0	0	0	blank	2020-05-04	0	0	1	1
96	0	Center_01	16	0	2020-03-07	14	58	0	2020-03-06	M	1	80	17	18	18	0	0	0	1	1	blank	4.Critical/Fatal	4	1	1	1	blank	blank	censored	1	1	0	0	1	0	0	0	0	0	0	0	0	0	blank	2020-05-04	0	0	1	1
97	0	Center_01	16	0	2020-03-07	15	58	0	2020-03-06	M	1	80	18	18	18	0	0	0	1	1	blank	4.Critical/Fatal	4	1	1	1	blank	blank	censored	1	1	0	0	1	0	0	0	0	0	0	0	0	0	blank	2020-05-04	0	0	1	1
98	0	Center_01	16	0	2020-03-07	16	58	0	2020-03-06	M	1	80	19	20	20	0	0	0	1	1	blank	4.Critical/Fatal	4	1	1	1	blank	blank	censored	1	1	0	0	1	0	0	0	0	0	0	0	0	0	blank	2020-05-04	0	0	1	1
99	0	Center_01	16	0	2020-03-07	17	58	0	2020-03-06	M	1	80	20	20	20	0	0	0	1	1	blank	4.Critical/Fatal	4	1	1	1	blank	blank	censored	1	1	0	0	1	0	0	0	0	0	0	0	0	0	blank	2020-05-04	0	0	1	1
100	0	Center_01	16	0	2020-03-07	18	58	0	2020-03-06	M	1	80	21	22	22	0	0	0	1	1	blank	4.Critical/Fatal	4	1	1	1	blank	blank	censored	1	1	0	0	1	0	0	0	0	0	0	0	0	0	blank	2020-05-04	0	0	1	1
101	0	Center_01	16	0	2020-03-07	19	58	0	2020-03-06	M	1	80	22	22	22	0	0	0	1	1	blank	4.Critical/Fatal	4	1	1	1	blank	blank	censored	1	1	0	0	1	0	0	0	0	0	0	0	0	0	blank	2020-05-04	0	0	1	1
102	0	Center_01	17	1	2020-03-19	1	5	1	2020-03-19	F	0	68	10	10	10	0	0	1	0	0	blank	2.Moderate	2	0	0	0	blank	blank	censored	1	0	0	0	0	0	0	0	0	1	0	0	1	0	blank	2020-03-24	0	0	0	0
103	0	Center_01	17	0	2020-03-19	2	5	1	2020-03-19	F	0	68	11	11	12	0	0	1	0	0	blank	2.Moderate	2	0	0	0	blank	blank	censored	1	0	0	0	0	0	0	0	0	1	0	0	1	0	blank	2020-03-24	0	0	0	0
104	0	Center_01	17	0	2020-03-19	4	5	1	2020-03-19	F	0	68	13	13	14	0	0	1	0	0	blank	2.Moderate	2	0	0	0	blank	blank	censored	1	0	0	0	0	0	0	0	0	1	0	0	1	0	blank	2020-03-24	0	0	0	0
105	0	Center_01	18	1	2020-03-22	0	31	1	2020-03-23	M	1	78	14	14	14	0	0	1	0	1	blank	4.Critical/Fatal	4	1	1	1	blank	blank	0	0	0	0	0	0	0	0	0	0	0	0	0	0	0	blank	2020-04-22	0	0	1	1
106	0	Center_01	18	0	2020-03-22	2	31	1	2020-03-23	M	1	78	16	16	16	0	0	0	1	1	blank	4.Critical/Fatal	4	1	1	1	blank	blank	0	0	0	0	0	0	0	0	0	0	0	0	0	0	0	blank	2020-04-22	0	0	1	1
107	0	Center_01	18	0	2020-03-22	2	31	1	2020-03-23	M	1	78	16	16	16	0	0	0	1	1	blank	4.Critical/Fatal	4	1	1	1	blank	blank	0	0	0	0	0	0	0	0	0	0	0	0	0	0	0	blank	2020-04-22	0	0	1	1
108	0	Center_01	18	0	2020-03-22	3	31	1	2020-03-23	M	1	78	17	18	18	0	0	0	1	1	blank	4.Critical/Fatal	4	1	1	1	blank	blank	0	0	0	0	0	0	0	0	0	0	0	0	0	0	0	blank	2020-04-22	0	0	1	1
109	0	Center_01	18	0	2020-03-22	4	31	1	2020-03-23	M	1	78	18	18	18	0	0	0	1	1	blank	4.Critical/Fatal	4	1	1	1	blank	blank	0	0	0	0	0	0	0	0	0	0	0	0	0	0	0	blank	2020-04-22	0	0	1	1
110	0	Center_01	19	1	2020-03-23	0	55	1	2020-03-23	M	1	88	7	7	8	1	0	1	0	1	blank	4.Critical/Fatal	4	1	1	1	blank	blank	censored	1	1	1	0	0	0	1	0	0	0	0	0	0	0	blank	2020-05-17	0	0	1	1
111	0	Center_01	19	0	2020-03-23	1	55	1	2020-03-23	M	1	88	8	8	8	0	0	1	0	1	blank	4.Critical/Fatal	4	1	1	1	blank	blank	censored	1	1	1	0	0	0	1	0	0	0	0	0	0	0	blank	2020-05-17	0	0	1	1
112	0	Center_01	19	0	2020-03-23	3	55	1	2020-03-23	M	1	88	10	10	10	0	0	0	1	1	blank	4.Critical/Fatal	4	1	1	1	blank	blank	censored	1	1	1	0	0	0	1	0	0	0	0	0	0	0	blank	2020-05-17	0	0	1	1
113	0	Center_01	20	1	2020-03-23	0	45	1	2020-03-23	M	1	58	3	3	4	1	0	1	0	0	blank	3.Severe	3	0	0	1	blank	blank	censored	1	0	1	1	0	1	0	0	0	0	0	0	0	0	blank	2020-05-07	0	0	0	0
114	0	Center_01	20	0	2020-03-23	1	45	1	2020-03-23	M	1	58	4	4	4	1	0	1	0	0	blank	3.Severe	3	0	0	1	blank	blank	censored	1	0	1	1	0	1	0	0	0	0	0	0	0	0	blank	2020-05-07	0	0	0	0
115	0	Center_01	20	0	2020-03-23	3	45	1	2020-03-23	M	1	58	6	6	6	1	0	1	0	0	blank	3.Severe	3	0	0	1	blank	blank	censored	1	0	1	1	0	1	0	0	0	0	0	0	0	0	blank	2020-05-07	0	0	0	0
116	0	Center_02	21	1	2020-02-21	0	4	1	blank	M	1	67	3	3	4	1	0	0	1	1	blank	4.Critical/Fatal	4	1	1	1	NO	typical symptoms COVID-19	censored	1	0	1	0	0	0	1	0	0	0	0	0	0	0	NA	2020-02-25	0	0	1	1
117	0	Center_02	22	1	2020-02-25	0	0	1	blank	F	0	63	3	3	4	1	1	0	0	1	blank	1.Mild	1	0	0	0	NO	Mild symptoms COVID-19		0	0	0	0	0	0	0	0	0	0	0	0	0	0	NA	2020-02-25	0	0	0	0
118	0	Center_02	23	1	2020-03-04	0	0	1	blank	M	1	69	7	7	8	1	1	0	0	1	blank	1.Mild	1	0	0	0	NO	Mild symptoms COVID-19		0	0	0	0	0	0	0	0	0	0	0	0	0	0	NA	2020-03-04	0	0	0	0
119	0	Center_02	24	1	2020-03-04	0	1	1	blank	F	0	62	5	5	6	1	0	1	0	0	blank	2.Moderate	2	0	0	0	NO	typical symptoms COVID-19	censored	1	0	1	0	0	0	0	0	1	0	0	0	0	0	5	2020-03-04	0	0	0	0
120	0	Center_02	25	1	2020-03-04	0	5	1	blank	M	1	81	1	1	2	1	0	1	0	0	DIED	4.Critical/Fatal	5	1	1	1	NO	typical symptoms COVID-19	censored	1	0	1	0	1	0	1	0	0	0	0	0	0	0	NA		2020-03-09	1	1	1
121	0	Center_02	26	1	2020-03-04	0	14	1	blank	M	1	60	7	7	8	1	0	1	0	0	blank	3.Severe	3	0	0	1	NO	typical symptoms COVID-19	censored	1	0	1	0	0	0	0	0	0	0	0	0	0	0	7	2020-03-18	0	0	0	0
122	0	Center_02	27	1	2020-03-04	0	16	1	blank	F	0	70	5	5	6	1	0	1	0	0	blank	3.Severe	3	0	0	1	NO	typical symptoms COVID-19	censored	1	0	0	1	0	0	0	1	0	0	0	0	0	0	NA	2020-03-20	0	0	0	0
123	0	Center_02	28	1	2020-03-04	0	8	1	blank	M	1	58	12	12	12	0	0	1	0	0	blank	3.Severe	3	0	0	1	NO	Mild symptoms COVID-19	0	0	0	0	0	0	0	0	0	0	0	0	0	0	0	12	2020-03-12	0	0	0	0
124	0	Center_02	29	1	2020-03-04	0	9	1	blank	F	0	49	9	9	10	0	0	1	0	0	blank	3.Severe	3	0	0	1	NO	typical symptoms COVID-19	0	0	0	0	0	0	0	0	0	0	0	0	0	0	0	NA	2020-03-13	0	0	0	0
125	0	Center_02	30	1	2020-03-04	0	5	1	blank	M	1	67	3	3	4	1	0	1	0	0	DIED	4.Critical/Fatal	5	1	1	1	NO	typical symptoms COVID-19	censored	1	0	0	0	1	1	0	0	0	0	0	0	0	0	3		2020-03-09	1	1	1
126	0	Center_02	30	0	2020-03-04	4	23	1	blank	M	1	67	7	7	8	1	0	1	0	0	DIED	4.Critical/Fatal	5	1	1	1	NO	typical symptoms COVID-19	censored	1	0	0	0	1	1	0	0	0	0	0	0	0	0	3		2020-03-27	1	1	1
127	0	Center_02	31	1	2020-03-04	0	7	1	blank	M	1	62	15	16	16	0	0	1	0	0	blank	3.Severe	3	0	0	1	NO	typical symptoms COVID-19	censored	1	0	0	1	0	0	0	0	0	0	0	0	1	0	15	2020-03-11	0	0	0	0
128	0	Center_02	32	1	2020-03-04	0	7	1	blank	M	1	80	10	10	10	0	0	0	1	1	blank	4.Critical/Fatal	5	1	1	1	NO	typical symptoms COVID-19		0	0	0	0	0	0	0	0	0	0	0	0	0	0	NA		2020-03-11	1	1	1
129	0	Center_02	33	1	2020-02-25	0	13	1	blank	M	1	78	3	3	4	1	0	1	0	0	DIED	4.Critical/Fatal	5	1	1	1	NO	typical symptoms COVID-19	censored	1	0	0	1	0	1	0	0	0	0	0	0	0	0	3		2020-03-09	1	1	1
130	0	Center_02	34	1	2020-03-04	0	12	1	blank	M	1	71	6	6	6	1	0	1	0	0	DIED	4.Critical/Fatal	5	1	1	1	NO	typical symptoms COVID-19	censored	1	1	0	0	0	1	0	0	0	0	0	0	0	0	6		2020-03-16	1	1	1
131	0	Center_02	35	1	2020-03-04	0	0	1	blank	F	0	47	7	7	8	1	1	0	0	1	blank	1.Mild	1	0	0	0	NO	Mild symptoms COVID-19		0	0	0	0	0	0	0	0	0	0	0	0	0	0	NA	2020-03-04	0	0	0	0
132	0	Center_02	36	1	2020-03-04	0		1	blank	M	1	52	1	1	2	1	0	0	1	1	blank	4.Critical/Fatal	4	1	1	1	NO	typical symptoms COVID-19		0	0	0	0	0	0	0	0	0	0	0	0	0	0	NA	2020-05-21	0	0	1	1
133	0	Center_02	37	1	2020-03-05	0	9	1	blank	M	1	73	7	7	8	1	0	1	0	0	blank	3.Severe	3	0	0	1	NO	typical symptoms COVID-19	censored	1	0	1	0	0	0	0	0	0	0	0	0	0	0	7	2020-03-14	0	0	0	0
134	0	Center_02	38	1	2020-03-05	0	2	1	blank	F	0	74	10	10	10	0	0	1	0	0	DIED	4.Critical/Fatal	5	1	1	1	NO	typical symptoms COVID-19	censored	1	0	1	0	0	0	0	0	0	0	0	0	0	0	10		2020-03-07	1	1	1
135	0	Center_02	39	1	2020-03-05	0	4	1	blank	M	1	58	11	11	12	0	0	1	0	0	blank	2.Moderate	2	0	0	0	NO	typical symptoms COVID-19	0	0	0	0	0	0	0	0	0	0	0	0	0	0	0	11	2020-03-09	0	0	0	0
136	0	Center_02	40	1	2020-03-05	0	0	1	blank	M	1	74	3	3	4	1	1	0	0	1	blank	1.Mild	1	0	0	0	NO	Mild symptoms COVID-19	censored	1	1	0	1	0	0	0	0	1	0	0	0	1	0	NA	2020-03-05	0	0	0	0
137	0	Center_02	41	1	2020-03-05	0	0	1	blank	M	1	72	3	3	4	1	1	0	0	1	blank	1.Mild	1	0	0	0	NO	Mild symptoms COVID-19		0	0	0	0	0	0	0	0	0	0	0	0	0	0	NA	2020-03-05	0	0	0	0
138	0	Center_02	42	1	2020-03-05	0	0	1	blank	M	1	35	2	2	2	1	1	0	0	1	blank	1.Mild	1	0	0	0	NO	Mild symptoms COVID-19		0	0	0	0	0	0	0	0	0	0	0	0	0	0	NA	2020-03-05	0	0	0	0
139	0	Center_02	43	1	2020-03-05	0	7	1	blank	M	1	75	7	7	8	1	0	1	0	0	blank	3.Severe	3	0	0	1	NO	typical symptoms COVID-19	censored	1	1	1	1	0	0	0	0	0	0	0	0	0	0	7	2020-03-12	0	0	0	0
140	0	Center_02	44	1	2020-02-25	0	3	1	blank	M	1	91	3	3	4	1	0	1	0	0	blank	2.Moderate	2	0	0	0	NO	typical symptoms COVID-19	censored	1	1	0	1	0	0	0	0	0	0	0	0	0	0	3	2020-02-28	0	0	0	0
141	0	Center_02	45	1	2020-03-05	0	27	1	blank	M	1	68	7	7	8	1	0	0	1	1	blank	4.Critical/Fatal	4	1	1	1	NO	severe symptoms COVID-19		0	0	0	0	0	0	0	0	0	0	0	0	0	0	NA	2020-04-01	0	0	1	1
142	0	Center_02	45	0	2020-03-05	1	27	1	blank	M	1	68	8	8	8	0	0	0	1	1	blank	4.Critical/Fatal	4	1	1	1	NO	severe symptoms COVID-19		0	0	0	0	0	0	0	0	0	0	0	0	0	0	NA	2020-04-01	0	0	1	1
143	0	Center_02	45	0	2020-03-05	1	27	1	blank	M	1	68	8	8	8	0	0	0	1	1	blank	4.Critical/Fatal	4	1	1	1	NO	severe symptoms COVID-19		0	0	0	0	0	0	0	0	0	0	0	0	0	0	NA	2020-04-01	0	0	1	1
144	0	Center_02	45	0	2020-03-05	2	27	1	blank	M	1	68	9	9	10	0	0	0	1	1	blank	4.Critical/Fatal	4	1	1	1	NO	severe symptoms COVID-19		0	0	0	0	0	0	0	0	0	0	0	0	0	0	NA	2020-04-01	0	0	1	1
145	0	Center_02	45	0	2020-03-05	3	27	1	blank	M	1	68	10	10	10	0	0	0	1	1	blank	4.Critical/Fatal	4	1	1	1	NO	severe symptoms COVID-19		0	0	0	0	0	0	0	0	0	0	0	0	0	0	NA	2020-04-01	0	0	1	1
146	0	Center_02	45	0	2020-03-05	4	27	1	blank	M	1	68	11	11	12	0	0	0	1	1	blank	4.Critical/Fatal	4	1	1	1	NO	severe symptoms COVID-19		0	0	0	0	0	0	0	0	0	0	0	0	0	0	NA	2020-04-01	0	0	1	1
147	0	Center_02	45	0	2020-03-05	5	27	1	blank	M	1	68	12	12	12	0	0	0	1	1	blank	4.Critical/Fatal	4	1	1	1	NO	severe symptoms COVID-19		0	0	0	0	0	0	0	0	0	0	0	0	0	0	NA	2020-04-01	0	0	1	1
148	0	Center_02	45	0	2020-03-05	5	27	1	blank	M	1	68	12	12	12	0	0	0	1	1	blank	4.Critical/Fatal	4	1	1	1	NO	severe symptoms COVID-19		0	0	0	0	0	0	0	0	0	0	0	0	0	0	NA	2020-04-01	0	0	1	1
149	0	Center_02	45	0	2020-03-05	6	27	1	blank	M	1	68	13	13	14	0	0	0	1	1	blank	4.Critical/Fatal	4	1	1	1	NO	severe symptoms COVID-19		0	0	0	0	0	0	0	0	0	0	0	0	0	0	NA	2020-04-01	0	0	1	1
150	0	Center_02	45	0	2020-03-05	6	27	1	blank	M	1	68	13	13	14	0	0	0	1	1	blank	4.Critical/Fatal	4	1	1	1	NO	severe symptoms COVID-19		0	0	0	0	0	0	0	0	0	0	0	0	0	0	NA	2020-04-01	0	0	1	1
151	0	Center_02	45	0	2020-03-05	7	27	1	blank	M	1	68	14	14	14	0	0	0	1	1	blank	4.Critical/Fatal	4	1	1	1	NO	severe symptoms COVID-19		0	0	0	0	0	0	0	0	0	0	0	0	0	0	NA	2020-04-01	0	0	1	1
152	0	Center_02	45	0	2020-03-05	7	27	1	blank	M	1	68	14	14	14	0	0	0	1	1	blank	4.Critical/Fatal	4	1	1	1	NO	severe symptoms COVID-19		0	0	0	0	0	0	0	0	0	0	0	0	0	0	NA	2020-04-01	0	0	1	1
153	0	Center_02	45	0	2020-03-05	8	27	0	blank	M	1	68	15	16	16	0	0	0	1	1	blank	4.Critical/Fatal	4	1	1	1	NO	severe symptoms COVID-19		0	0	0	0	0	0	0	0	0	0	0	0	0	0	NA	2020-04-01	0	0	1	1
154	0	Center_02	45	0	2020-03-05	9	27	0	blank	M	1	68	16	16	16	0	0	0	1	1	blank	4.Critical/Fatal	4	1	1	1	NO	severe symptoms COVID-19		0	0	0	0	0	0	0	0	0	0	0	0	0	0	NA	2020-04-01	0	0	1	1
155	0	Center_02	45	0	2020-03-05	10	27	0	blank	M	1	68	17	18	18	0	0	0	1	1	blank	4.Critical/Fatal	4	1	1	1	NO	severe symptoms COVID-19		0	0	0	0	0	0	0	0	0	0	0	0	0	0	NA	2020-04-01	0	0	1	1
156	0	Center_02	45	0	2020-03-05	11	27	0	blank	M	1	68	18	18	18	0	0	0	1	1	blank	4.Critical/Fatal	4	1	1	1	NO	severe symptoms COVID-19		0	0	0	0	0	0	0	0	0	0	0	0	0	0	NA	2020-04-01	0	0	1	1
157	0	Center_02	45	0	2020-03-05	12	27	0	blank	M	1	68	19	20	20	0	0	0	1	1	blank	4.Critical/Fatal	4	1	1	1	NO	severe symptoms COVID-19		0	0	0	0	0	0	0	0	0	0	0	0	0	0	NA	2020-04-01	0	0	1	1
158	0	Center_02	45	0	2020-03-05	13	27	0	blank	M	1	68	20	20	20	0	0	0	1	1	blank	4.Critical/Fatal	4	1	1	1	NO	severe symptoms COVID-19		0	0	0	0	0	0	0	0	0	0	0	0	0	0	NA	2020-04-01	0	0	1	1
159	0	Center_02	45	0	2020-03-05	14	27	0	blank	M	1	68	21	22	22	0	0	0	1	1	blank	4.Critical/Fatal	4	1	1	1	NO	severe symptoms COVID-19		0	0	0	0	0	0	0	0	0	0	0	0	0	0	NA	2020-04-01	0	0	1	1
160	0	Center_02	45	0	2020-03-05	15	27	0	blank	M	1	68	22	22	22	0	0	0	1	1	blank	4.Critical/Fatal	4	1	1	1	NO	severe symptoms COVID-19		0	0	0	0	0	0	0	0	0	0	0	0	0	0	NA	2020-04-01	0	0	1	1
161	0	Center_02	45	0	2020-03-05	16	27	0	blank	M	1	68	23	24	24	0	0	0	1	1	blank	4.Critical/Fatal	4	1	1	1	NO	severe symptoms COVID-19		0	0	0	0	0	0	0	0	0	0	0	0	0	0	NA	2020-04-01	0	0	1	1
162	0	Center_02	45	0	2020-03-05	17	27	0	blank	M	1	68	24	24	24	0	0	0	1	1	blank	4.Critical/Fatal	4	1	1	1	NO	severe symptoms COVID-19		0	0	0	0	0	0	0	0	0	0	0	0	0	0	NA	2020-04-01	0	0	1	1
163	0	Center_02	45	0	2020-03-05	18	27	0	blank	M	1	68	25	26	26	0	0	0	1	1	blank	4.Critical/Fatal	4	1	1	1	NO	severe symptoms COVID-19		0	0	0	0	0	0	0	0	0	0	0	0	0	0	NA	2020-04-01	0	0	1	1
164	0	Center_02	45	0	2020-03-05	19	27	0	blank	M	1	68	26	26	26	0	0	0	1	1	blank	4.Critical/Fatal	4	1	1	1	NO	severe symptoms COVID-19		0	0	0	0	0	0	0	0	0	0	0	0	0	0	NA	2020-04-01	0	0	1	1
165	0	Center_02	45	0	2020-03-05	20	27	0	blank	M	1	68	27	28	28	0	0	0	1	1	blank	4.Critical/Fatal	4	1	1	1	NO	severe symptoms COVID-19		0	0	0	0	0	0	0	0	0	0	0	0	0	0	NA	2020-04-01	0	0	1	1
166	0	Center_02	45	0	2020-03-05	21	27	0	blank	M	1	68	28	28	28	0	0	0	1	1	blank	4.Critical/Fatal	4	1	1	1	NO	severe symptoms COVID-19		0	0	0	0	0	0	0	0	0	0	0	0	0	0	NA	2020-04-01	0	0	1	1
167	0	Center_02	45	0	2020-03-05	22	27	0	blank	M	1	68	29	29-46	29-46		0	0	1	1	blank	4.Critical/Fatal	4	1	1	1	NO	severe symptoms COVID-19		0	0	0	0	0	0	0	0	0	0	0	0	0	0	NA	2020-04-01	0	0	1	1
168	0	Center_02	46	1	2020-03-05	0	7	1	blank	F	0	75	10	10	10	0	0	1	0	0	blank	3.Severe	3	0	0	1	NO	typical symptoms COVID-19	censored	1	0	0	0	0	0	0	0	1	0	0	0	0	0	10	2020-03-12	0	0	0	0
169	0	Center_02	47	1	2020-03-05	0	8	1	blank	M	1	73	4	4	4	1	0	1	0	0	blank	3.Severe	3	0	0	1	NO	Mild symptoms COVID-19	censored	1	1	0	0	0	0	0	0	0	0	0	0	0	0	NA	2020-03-13	0	0	0	0
170	0	Center_02	48	1	2020-03-05	0	3	1	blank	F	0	74	10	10	10	0	0	1	0	0	DIED	4.Critical/Fatal	5	1	1	1	NO	typical symptoms COVID-19	censored	1	1	1	1	1	0	0	0	0	0	0	0	0	0	0		2020-03-08	1	1	1
171	0	Center_02	49	1	2020-03-05	0	3	1	blank	M	1	82	10	10	10	0	0	1	0	0	blank	4.Critical/Fatal	5	1	1	1	blank	blank		0	0	0	0	0	0	0	0	0	0	0	0	0	0	blank		2020-03-08	1	1	1
172	0	Center_02	50	1	2020-03-05	0	25	1	blank	M	1	75	3	3	4	1	0	1	0	0	blank	3.Severe	3	0	0	1	NO	typical symptoms COVID-19	censored	1	0	0	0	0	0	0	1	0	0	0	0	0	0	3	2020-03-30	0	0	0	0
173	0	Center_02	51	1	2020-03-05	0		1	blank	M	1	63	7	7	8	1	0	1	0	0	blank	3.Severe	3	0	0	1	NO	typical symptoms COVID-19	0	0	0	0	0	0	0	0	0	0	0	0	0	0	0	7	2020-03-07	0	0	0	0
174	0	Center_02	52	1	2020-03-05	0	10	1	blank	F	0	74	5	5	6	1	0	1	0	0	blank	4.Critical/Fatal	5	1	1	1	NO	typical symptoms COVID-19	censored	1	0	0	0	0	0	1	0	0	0	0	0	0	0	NA		2020-03-15	1	1	1
175	0	Center_02	53	1	2020-03-05	0		1	blank	M	1	64	3	3	4	1	0	0	1	1	blank	4.Critical/Fatal	4	1	1	1	NO	typical symptoms COVID-19	0	0	0	0	0	0	0	0	0	0	0	0	0	0	0	3	2020-03-24	0	0	1	1
176	0	Center_02	54	1	2020-03-05	0	14	1	blank	F	0	83	2	2	2	1	0	1	0	0	DIED	4.Critical/Fatal	5	1	1	1	NO	typical symptoms COVID-19	censored	1	1	1	0	0	0	0	0	0	0	0	0	1	0	2		2020-03-19	1	1	1
177	0	Center_02	54	0	2020-03-05	4	14	1	blank	F	0	83	6	6	6	1	0	1	0	0	DIED	4.Critical/Fatal	5	1	1	1	NO	typical symptoms COVID-19	censored	1	1	1	0	0	0	0	0	0	0	0	0	1	0	2		2020-03-19	1	1	1
178	0	Center_02	54	0	2020-03-05	10	14	0	blank	F	0	83	12	12	12	0	0	1	0	0	DIED	4.Critical/Fatal	5	1	1	1	NO	typical symptoms COVID-19	censored	1	1	1	0	0	0	0	0	0	0	0	0	1	0	2		2020-03-19	1	1	1
179	0	Center_02	54	0	2020-03-05	11	14	0	blank	F	0	83	13	13	14	0	0	1	0	0	DIED	4.Critical/Fatal	5	1	1	1	NO	typical symptoms COVID-19	censored	1	1	1	0	0	0	0	0	0	0	0	0	1	0	2		2020-03-19	1	1	1
180	0	Center_02	55	1	2020-02-25	0	4	1	blank	M	1	70	5	5	6	1	0	1	0	0	blank	2.Moderate	2	0	0	0	NO	Mild symptoms COVID-19	censored	1	0	1	1	0	1	0	0	0	0	0	0	1	0	5	2020-02-29	0	0	0	0
181	0	Center_02	56	1	2020-03-05	0		1	blank	M	1	67	3	3	4	1	0	0	1	1	blank	4.Critical/Fatal	4	1	1	1	NO	Severe symptoms COVID-19	censored	1	0	1	0	0	0	0	0	0	0	0	0	0	0	0	2020-05-25	0	0	1	1
182	0	Center_02	57	1	2020-03-05	0	46	1	blank	F	0	71	7	7	8	1	0	1	0	0	blank	3.Severe	3	0	0	1	NO	typical symptoms COVID-19	censored	1	0	0	0	1	0	0	0	0	1	0	0	1	0	7	2020-04-20	0	0	0	0
183	0	Center_02	58	1	2020-03-05	0	22	1	blank	M	1	81	3	3	4	1	0	1	0	0	blank	3.Severe	3	0	0	1	NO	Mild symptoms COVID-19	censored	1	0	1	1	0	0	0	0	0	0	0	0	0	0	3	2020-03-27	0	0	0	0
184	0	Center_02	59	1	2020-03-05	0	0	1	blank	F	0	66	7	7	8	1	1	0	0	1	blank	1.Mild	1	0	0	0	NO	Mild symptoms COVID-19	censored	1	0	1	0	0	1	0	0	0	0	0	0	1	0	7	2020-03-05	0	0	0	0
185	0	Center_02	60	1	2020-03-05	0	18	1	blank	F	0	82	10	10	10	0	0	1	0	0	blank	3.Severe	3	0	0	1	NO	typical symptoms COVID-19	censored	1	1	0	0	0	0	1	0	0	0	0	0	0	0	10	2020-03-23	0	0	0	0
186	0	Center_02	61	1	2020-03-05	0	0	1	x	M	1	87	6	6	6	1	1	0	0	1	blank	1.Mild	1	0	0	0	NO	Mild symptoms COVID-19		0	0	0	0	0	0	0	0	0	0	0	0	0	0	NA	2020-03-05	0	0	0	0
187	0	Center_02	62	1	2020-03-05	0	3	1	blank	M	1	83	3	3	4	1	0	1	0	0	blank	4.Critical/Fatal	5	1	1	1	NO	typical symptoms COVID-19	censored	1	0	1	1	0	0	0	1	0	0	0	0	0	0	3		2020-03-08	1	1	1
188	0	Center_02	63	1	2020-03-05	0	7	1	blank	M	1	68	10	10	10	0	0	1	0	0	blank	3.Severe	3	0	0	1	NO	typical symptoms COVID-19	censored	1	1	0	0	0	0	0	0	0	0	0	0	1	0	10	2020-03-12	0	0	0	0
189	0	Center_02	64	1	2020-03-05	0	6	1	blank	F	0	25	4	4	4	1	0	1	0	0	blank	3.Severe	3	0	0	1	NO	typical symptoms COVID-19	censored	1	0	0	0	0	0	0	0	0	1	0	0	1	0	4	2020-03-11	0	0	0	0
190	0	Center_02	65	1	2020-03-06	0	7	1	blank	M	1	65	5	5	6	1	0	1	0	0	blank	3.Severe	3	0	0	1	blank	blank		0	0	0	0	0	0	0	0	0	0	0	0	0	0	blank	2020-03-13	0	0	0	0
191	0	Center_02	66	1	2020-02-26	0	9	1	blank	M	1	73	7	7	8	1	0	1	0	0	DIED	4.Critical/Fatal	5	1	1	1	NO	typical symptoms COVID-19	censored	1	0	1	1	0	0	0	0	0	0	0	0	0	0	7		2020-03-06	1	1	1
192	0	Center_02	67	1	2020-03-06	0	12	1	blank	M	1	58	8	8	8	0	0	1	0	0	blank	3.Severe	3	0	0	1	blank	blank		0	0	0	0	0	0	0	0	0	0	0	0	0	0	blank	2020-03-18	0	0	0	0
193	0	Center_02	68	1	2020-03-06	0	7	1	blank	M	1	73	7	7	8	1	0	1	0	0	blank	3.Severe	3	0	0	1	NO	typical symptoms COVID-19	censored	1	0	0	0	0	1	1	0	0	0	0	0	1	0	7	2020-03-13	0	0	0	0
194	0	Center_02	69	1	2020-03-06	0	0	1	blank	F	0	69	3	3	4	1	1	0	0	1	blank	1.Mild	1	0	0	0	NA	NA		0	0	0	0	0	0	0	0	0	0	0	0	0	0	NA	2020-03-06	0	0	0	0
195	0	Center_02	70	1	2020-03-06	0	6	1	blank	M	1	57	5	5	6	1	0	1	0	0	blank	3.Severe	3	0	0	1	NO	typical symptoms COVID-19	censored	1	0	0	0	0	0	0	0	0	0	0	0	1	0	5	2020-03-12	0	0	0	0
196	0	Center_02	71	1	2020-03-06	0	6	1	blank	M	1	77	7	7	8	1	0	1	0	0	blank	3.Severe	3	0	0	1	NO	typical symptoms COVID-19	censored	1	1	1	0	0	0	0	0	0	0	0	0	0	0	7	2020-03-12	0	0	0	0
197	0	Center_02	72	1	2020-03-06	0	0	1	blank	M	1	60	3	3	4	1	1	0	0	1	blank	1.Mild	1	0	0	0	NO	typical symptoms COVID-19	censored	1	1	0	0	0	0	0	0	1	0	0	0	0	0	NA	2020-03-06	0	0	0	0
198	0	Center_02	73	1	2020-03-06	0	5	1	blank	M	1	36	10	10	10	0	0	1	0	0	blank	2.Moderate	2	0	0	0	NO	typical symptoms COVID-19	0	0	0	0	0	0	0	0	0	0	0	0	0	0	0	10	2020-03-11	0	0	0	0
199	0	Center_02	74	1	2020-03-06	0		1	blank	F	0	72	10	10	10	0	0	1	0	0	blank	3.Severe	3	0	0	1	NO	typical symptoms COVID-19	censored	1	0	1	0	0	0	0	0	1	0	0	0	0	0	10	2020-05-21	0	0	0	0
200	0	Center_02	75	1	2020-03-06	0	13	1	blank	M	1	58	5	5	6	1	0	1	0	0	blank	3.Severe	3	0	0	1	NO	typical symptoms COVID-19	censored	1	0	0	0	0	0	0	0	0	0	0	0	1	0	5	2020-03-19	0	0	0	0
201	0	Center_02	76	1	2020-03-06	0	0	1	blank	M	1	42	0	1	2	1	1	0	0	1	blank	1.Mild	1	0	0	0	blank	blank		0	0	0	0	0	0	0	0	0	0	0	0	0	0	blank	2020-03-07	0	0	0	0
202	0	Center_02	77	1	2020-02-26	0	15	1	blank	F	0	90	4	4	4	1	0	1	0	0	blank	3.Severe	3	0	0	1	NO	Mild symptoms COVID-19	censored	1	0	0	0	0	0	0	1	0	0	0	0	0	0	NA	2020-03-12	0	0	0	0
203	0	Center_02	78	1	2020-03-06	0	41	1	blank	F	0	77	15	16	16	0	0	1	0	0	blank	4.Critical/Fatal	5	1	1	1	NO	typical symptoms COVID-19	0	0	0	0	0	0	0	0	0	0	0	0	0	0	0	15		2020-04-16	1	1	1
204	0	Center_02	79	1	2020-03-06	0	14	1	blank	M	1	52	1	1	2	1	0	1	0	0	blank	3.Severe	3	0	0	1	NO	Mild symptoms COVID-19	censored	1	1	0	0	0	0	1	0	0	1	1	0	1	0	NA	2020-03-20	0	0	0	0
205	0	Center_02	79	0	2020-03-06	0	14	1	blank	M	1	52	1	1	2	1	0	1	0	0	blank	3.Severe	3	0	0	1	NO	Mild symptoms COVID-19	censored	1	1	0	0	0	0	1	0	0	1	1	0	1	0	NA	2020-03-20	0	0	0	0
206	0	Center_02	79	0	2020-03-06	1	14	1	blank	M	1	52	2	2	2	1	0	1	0	0	blank	3.Severe	3	0	0	1	NO	Mild symptoms COVID-19	censored	1	1	0	0	0	0	1	0	0	1	1	0	1	0	NA	2020-03-20	0	0	0	0
207	0	Center_02	79	0	2020-03-06	2	14	1	blank	M	1	52	3	3	4	1	0	1	0	0	blank	3.Severe	3	0	0	1	NO	Mild symptoms COVID-19	censored	1	1	0	0	0	0	1	0	0	1	1	0	1	0	NA	2020-03-20	0	0	0	0
208	0	Center_02	79	0	2020-03-06	3	14	1	blank	M	1	52	4	4	4	1	0	1	0	0	blank	3.Severe	3	0	0	1	NO	Mild symptoms COVID-19	censored	1	1	0	0	0	0	1	0	0	1	1	0	1	0	NA	2020-03-20	0	0	0	0
209	0	Center_02	79	0	2020-03-06	5	14	1	blank	M	1	52	6	6	6	1	0	1	0	0	blank	3.Severe	3	0	0	1	NO	Mild symptoms COVID-19	censored	1	1	0	0	0	0	1	0	0	1	1	0	1	0	NA	2020-03-20	0	0	0	0
210	0	Center_02	79	0	2020-03-06	7	14	1	blank	M	1	52	8	8	8	0	0	1	0	0	blank	3.Severe	3	0	0	1	NO	Mild symptoms COVID-19	censored	1	1	0	0	0	0	1	0	0	1	1	0	1	0	NA	2020-03-20	0	0	0	0
211	0	Center_02	79	0	2020-03-06	8	14	0	blank	M	1	52	9	9	10	0	0	1	0	0	blank	3.Severe	3	0	0	1	NO	Mild symptoms COVID-19	censored	1	1	0	0	0	0	1	0	0	1	1	0	1	0	NA	2020-03-20	0	0	0	0
212	0	Center_02	79	0	2020-03-06	9	14	0	blank	M	1	52	10	10	10	0	0	1	0	0	blank	3.Severe	3	0	0	1	NO	Mild symptoms COVID-19	censored	1	1	0	0	0	0	1	0	0	1	1	0	1	0	NA	2020-03-20	0	0	0	0
213	0	Center_02	79	0	2020-03-06	10	14	0	blank	M	1	52	11	11	12	0	0	1	0	0	blank	3.Severe	3	0	0	1	NO	Mild symptoms COVID-19	censored	1	1	0	0	0	0	1	0	0	1	1	0	1	0	NA	2020-03-20	0	0	0	0
214	0	Center_02	79	0	2020-03-06	12	14	0	blank	M	1	52	14	14	14	0	0	1	0	0	blank	3.Severe	3	0	0	1	NO	Mild symptoms COVID-19	censored	1	1	0	0	0	0	1	0	0	1	1	0	1	0	NA	2020-03-20	0	0	0	0
215	0	Center_02	80	1	2020-03-06	0	2	1	blank	M	1	59	6	6	6	1	0	1	0	0	blank	2.Moderate	2	0	0	0	NO	Mild symptoms COVID-19		0	0	0	0	0	0	0	0	0	0	0	0	0	0	NA	2020-03-08	0	0	0	0
216	0	Center_02	81	1	2020-03-06	0	5	1	blank	M	1	73	15	16	16	0	0	1	0	0	DIED	4.Critical/Fatal	5	1	1	1	NO	typical symptoms COVID-19	censored	1	1	0	0	0	0	0	0	0	0	0	0	0	0	15		2020-03-11	1	1	1
217	0	Center_02	82	1	2020-03-06	0	7	1	blank	M	1	57	7	7	8	1	0	1	0	0	blank	3.Severe	3	0	0	1	NO	typical symptoms COVID-19	censored	1	0	1	0	0	0	0	0	0	0	0	0	0	0	7	2020-03-13	0	0	0	0
218	0	Center_02	83	1	2020-03-06	0	0	1	blank	M	1	37	2	2	2	1	1	0	0	1	blank	1.Mild	1	0	0	0	NO	Mild symptoms COVID-19		0	0	0	0	0	0	0	0	0	0	0	0	0	0	NA	2020-03-06	0	0	0	0
219	Sepsis	Center_02	84	1	2020-03-06	0	0	1	blank	F	0	91	0	1	2	1	1	0	0	1	sepsis bac?	1.Mild	1	0	0	0	NO	Mild symptoms COVID-19		0	0	0	0	0	0	0	0	0	0	0	0	0	0	NA	2020-03-06	0	0	0	0
220	0	Center_02	85	1	2020-03-06	0	10	1	blank	M	1	32	1	1	2	1	0	0	1	1	blank	4.Critical/Fatal	4	1	1	1	NO	severe symptoms COVID-19		0	0	0	0	0	0	0	0	0	0	0	0	0	0	NA	2020-03-16	0	0	1	1
221	0	Center_02	86	1	2020-03-06	0	2	1	blank	F	0	86	15	16	16	0	0	1	0	0	DIED	4.Critical/Fatal	5	1	1	1	NO	typical symptoms COVID-19	censored	1	0	1	0	1	0	0	0	0	0	0	0	0	0	15		2020-03-08	1	1	1
222	0	Center_02	87	1	2020-03-06	0	0	1	blank	M	1	55	3	3	4	1	1	0	0	1	blank	1.Mild	1	0	0	0	NO	Mild symptoms COVID-19		0	0	0	0	0	0	0	0	0	0	0	0	0	0	NA	2020-03-06	0	0	0	0
223	0	Center_02	88	1	2020-02-26	0	29	1	blank	M	1	62	7	7	8	1	0	1	0	0	blank	3.Severe	3	0	0	1	NO	typical symptoms COVID-19	0	0	0	0	0	0	0	0	0	0	0	0	0	0	0	7	2020-03-26	0	0	0	0
224	age	Center_02	89	1	2020-03-06	0	49	1	blank	F	0	15	5	5	6	1	0	1	0	0	blank	3.Severe	3	0	0	1	NO	Mild symptoms COVID-19	censored	1	0	0	0	0	0	0	0	0	1	0	0	1	0	NA	2020-04-24	0	0	0	0
225	0	Center_02	90	1	2020-03-07	0	0	1	blank	F	0	92	3	3	4	1	1	0	0	1	blank	1.Mild	1	0	0	0	NO	Mild symptoms COVID-19		0	0	0	0	0	0	0	0	0	0	0	0	0	0	NA	2020-03-07	0	0	0	0
226	0	Center_02	91	1	2020-03-07	0	1	1	blank	F	0	54	3	3	4	1	0	1	0	0	blank	2.Moderate	2	0	0	0	NO	typical symptoms COVID-19	0	0	0	0	0	0	0	0	0	0	0	0	0	0	0	NA	2020-03-07	0	0	0	0
227	0	Center_02	92	1	2020-03-07	0	21	1	blank	M	1	68	7	7	8	1	0	1	0	0	blank	3.Severe	3	0	0	1	NO	typical symptoms COVID-19	0	0	0	0	0	0	0	0	0	0	0	0	0	0	0	7	2020-03-28	0	0	0	0
228	0	Center_02	93	1	2020-03-07	0	2	1	blank	M	1	71	9	9	10	0	0	1	0	0	DIED	4.Critical/Fatal	5	1	1	1	NO	typical symptoms COVID-19	censored	1	1	1	0	0	0	0	0	0	0	0	0	0	0	NA		2020-03-09	1	1	1
229	0	Center_02	93	0	2020-03-07	1	2	1	blank	M	1	71	0	1	2	1	0	1	0	0	DIED	4.Critical/Fatal	5	1	1	1	NO	typical symptoms COVID-19	censored	1	1	1	0	0	0	0	0	0	0	0	0	0	0	NA		2020-03-09	1	1	1
230	0	Center_02	93	0	2020-03-07	2	2	1	blank	M	1	71	0	1	2	1	0	1	0	0	DIED	4.Critical/Fatal	5	1	1	1	NO	typical symptoms COVID-19	censored	1	1	1	0	0	0	0	0	0	0	0	0	0	0	NA		2020-03-09	1	1	1
231	0	Center_02	94	1	2020-03-07	0	6	1	blank	F	0	66	4	4	4	1	0	1	0	0	blank	3.Severe	3	0	0	1	NO	typical symptoms COVID-19	censored	1	0	1	1	0	0	0	0	0	0	0	0	0	0	NA	2020-03-13	0	0	0	0
232	0	Center_02	95	1	2020-03-07	0	13	1	blank	M	1	82	10	10	10	0	0	1	0	0	blank	3.Severe	3	0	0	1	NO	typical symptoms COVID-19	0	0	0	0	0	0	0	0	0	0	0	0	0	0	0	10	2020-03-20	0	0	0	0
233	0	Center_02	96	1	2020-03-07	0	0	1	blank	M	1	89	7	7	8	1	0	1	0	0	DIED	4.Critical/Fatal	5	1	1	1	NO	typical symptoms COVID-19	censored	1	1	1	0	0	0	0	0	0	0	0	0	0	0	7		2020-03-07	1	1	1
234	0	Center_02	97	1	2020-03-07	0	7	1	blank	M	1	62	10	10	10	0	0	1	0	0	blank	3.Severe	3	0	0	1	NO	typical symptoms COVID-19	censored	1	0	1	0	0	0	0	0	0	0	0	0	0	0	10	2020-03-14	0	0	0	0
235	0	Center_02	98	1	2020-03-07	0	14	1	blank	F	0	78	10	10	10	0	0	1	0	0	blank	3.Severe	3	0	0	1	NO	typical symptoms COVID-19	censored	1	1	1	1	0	0	0	0	0	1	0	0	0	0	10	2020-03-21	0	0	0	0
236	0	Center_02	98	0	2020-03-07	2	14	1	blank	F	0	78	12	12	12	0	0	1	0	0	blank	3.Severe	3	0	0	1	NO	typical symptoms COVID-19	censored	1	1	1	1	0	0	0	0	0	1	0	0	0	0	10	2020-03-21	0	0	0	0
237	0	Center_02	98	0	2020-03-07	4	14	1	blank	F	0	78	14	14	14	0	0	1	0	0	blank	3.Severe	3	0	0	1	NO	typical symptoms COVID-19	censored	1	1	1	1	0	0	0	0	0	1	0	0	0	0	10	2020-03-21	0	0	0	0
238	0	Center_02	98	0	2020-03-07	5	14	1	blank	F	0	78	15	16	16	0	0	1	0	0	blank	3.Severe	3	0	0	1	NO	typical symptoms COVID-19	censored	1	1	1	1	0	0	0	0	0	1	0	0	0	0	10	2020-03-21	0	0	0	0
239	0	Center_02	98	0	2020-03-07	13	14	0	blank	F	0	78	23	24	24	0	0	1	0	0	blank	3.Severe	3	0	0	1	NO	typical symptoms COVID-19	censored	1	1	1	1	0	0	0	0	0	1	0	0	0	0	10	2020-03-21	0	0	0	0
240	0	Center_02	99	1	2020-02-26	0	5	1	blank	M	1	83	4	4	4	1	0	0	1	1	DIED	4.Critical/Fatal	5	1	1	1	NO	severe symptoms COVID-19	censored	1	1	0	0	0	1	0	0	0	0	0	0	0	0	NA		2020-03-02	1	1	1
241	0	Center_02	99	0	2020-02-26	1	5	1	blank	M	1	83	5	5	6	1	0	0	1	1	DIED	4.Critical/Fatal	5	1	1	1	NO	severe symptoms COVID-19		0	0	0	0	0	0	0	0	0	0	0	0	0	0	NA		2020-03-02	1	1	1
242	0	Center_02	99	0	2020-02-26	2	5	1	blank	M	1	83	6	6	6	1	0	0	1	1	DIED	4.Critical/Fatal	5	1	1	1	NO	severe symptoms COVID-19	censored	1	1	0	0	0	1	0	0	0	0	0	0	0	0	NA		2020-03-02	1	1	1
243	0	Center_02	99	0	2020-02-26	3	5	1	blank	M	1	83	7	7	8	1	0	0	1	1	DIED	4.Critical/Fatal	5	1	1	1	NO	severe symptoms COVID-19	censored	1	1	0	0	0	1	0	0	0	0	0	0	0	0	NA		2020-03-02	1	1	1
244	0	Center_02	99	0	2020-02-26	4	5	1	blank	M	1	83	8	8	8	0	0	0	1	1	DIED	4.Critical/Fatal	5	1	1	1	NO	severe symptoms COVID-19		0	0	0	0	0	0	0	0	0	0	0	0	0	0	NA		2020-03-02	1	1	1
245	0	Center_02	99	0	2020-02-26	5	5	1	blank	M	1	83	9	9	10	0	0	0	1	1	DIED	4.Critical/Fatal	5	1	1	1	NO	severe symptoms COVID-19	censored	1	1	0	0	0	1	0	0	0	0	0	0	0	0	NA		2020-03-02	1	1	1
246	0	Center_02	100	1	2020-03-07	0	3	1	blank	M	1	80	4	4	4	1	0	1	0	0	DIED	4.Critical/Fatal	5	1	1	1	NO	typical symptoms COVID-19	censored	1	1	1	1	0	0	0	0	0	1	0	0	0	0	NA		2020-03-10	1	1	1
247	0	Center_02	101	1	2020-03-07	0	2	1	blank	M	1	87	0	1	2	1	0	1	0	0	DIED	4.Critical/Fatal	5	1	1	1	NO	typical symptoms COVID-19		0	0	0	0	0	0	0	0	0	0	0	0	0	0	NA		2020-03-09	1	1	1
248	0	Center_02	102	1	2020-03-07	0	11	1	blank	M	1	58	10	10	10	0	0	1	0	0	blank	3.Severe	3	0	0	1	NO	typical symptoms COVID-19	0	0	0	0	0	0	0	0	0	0	0	0	0	0	0	10	2020-03-18	0	0	0	0
249	0	Center_02	103	1	2020-03-07	0	3	1	blank	M	1	67	7	7	8	1	0	1	0	0	DIED	4.Critical/Fatal	5	1	1	1	NO	typical symptoms COVID-19	censored	1	0	0	0	0	1	0	0	0	0	0	0	0	0	7		2020-03-10	1	1	1
250	0	Center_02	103	0	2020-03-07	1	3	1	blank	M	1	67	8	8	8	0	0	1	0	0	DIED	4.Critical/Fatal	5	1	1	1	NO	typical symptoms COVID-19	censored	1	0	0	0	0	1	0	0	0	0	0	0	0	0	7		2020-03-10	1	1	1
251	0	Center_02	104	1	2020-03-07	0	shift	1	blank	M	1	72	15	16	16	0	0	0	1	1	blank	4.Critical/Fatal	4	1	1	1	NO	severe symptoms COVID-19	censored	1	1	0	0	0	0	0	0	0	0	0	0	0	0	15	2020-03-07	0	0	1	1
252	0	Center_02	105	1	2020-03-07	0	14	1	blank	F	0	39	12	12	12	0	0	1	0	0	blank	3.Severe	3	0	0	1	NO	typical symptoms COVID-19		0	0	0	0	0	0	0	0	0	0	0	0	0	0	12	2020-03-21	0	0	0	0
253	0	Center_02	106	1	2020-03-07	0	6	1	blank	M	1	85	7	7	8	1	0	1	0	0	blank	4.Critical/Fatal	5	1	1	1	NO	typical symptoms COVID-19	censored	1	1	0	0	0	0	0	0	0	0	0	0	0	0	7		2020-03-13	1	1	1
254	0	Center_02	107	1	2020-03-07	0	0	1	blank	F	0	40	3	3	4	1	1	0	0	1	blank	1.Mild	1	0	0	0	NO	Mild symptoms COVID-19	0	0	0	0	0	0	0	0	0	0	0	0	0	0	0	3	2020-03-07	0	0	0	0
255	0	Center_02	108	1	2020-03-07	0	5	1	blank	M	1	69	10	10	10	0	0	1	0	0	blank	2.Moderate	2	0	0	0	NO	typical symptoms COVID-19	censored	1	0	0	0	0	0	0	0	1	0	0	0	0	0	10	2020-03-12	0	0	0	0
256	0	Center_02	109	1	2020-03-07	0	6	1	blank	M	1	71	6	6	6	1	0	1	0	0	blank	4.Critical/Fatal	5	1	1	1	NO	Severe symptoms COVID-19	censored	1	0	1	0	0	1	0	0	0	0	0	0	0	0	6		2020-03-13	1	1	1
257	0	Center_02	110	1	2020-02-26	0	21	1	blank	M	1	57	9	9	10	0	0	1	0	0	blank	3.Severe	3	0	0	1	NO	typical symptoms COVID-19	censored	1	0	1	0	0	0	0	0	0	0	0	0	0	0	9	2020-03-18	0	0	0	0
258	0	Center_02	110	0	2020-02-26	1	21	1	blank	M	1	57	10	10	10	0	0	1	0	0	blank	3.Severe	3	0	0	1	NO	typical symptoms COVID-19		0	0	0	0	0	0	0	0	0	0	0	0	0	0	9	2020-03-18	0	0	0	0
259	0	Center_02	110	0	2020-02-26	2	21	1	blank	M	1	57	11	11	12	0	0	1	0	0	blank	3.Severe	3	0	0	1	NO	typical symptoms COVID-19	censored	1	0	1	0	0	0	0	0	0	0	0	0	0	0	9	2020-03-18	0	0	0	0
260	0	Center_02	110	0	2020-02-26	3	21	1	blank	M	1	57	12	12	12	0	0	1	0	0	blank	3.Severe	3	0	0	1	NO	typical symptoms COVID-19	censored	1	0	1	0	0	0	0	0	0	0	0	0	0	0	9	2020-03-18	0	0	0	0
261	0	Center_02	110	0	2020-02-26	4	21	1	blank	M	1	57	13	13	14	0	0	1	0	0	blank	3.Severe	3	0	0	1	NO	typical symptoms COVID-19	censored	1	0	1	0	0	0	0	0	0	0	0	0	0	0	9	2020-03-18	0	0	0	0
262	0	Center_02	110	0	2020-02-26	5	21	1	blank	M	1	57	14	14	14	0	0	1	0	0	blank	3.Severe	3	0	0	1	NO	typical symptoms COVID-19	censored	1	0	1	0	0	0	0	0	0	0	0	0	0	0	9	2020-03-18	0	0	0	0
263	0	Center_02	110	0	2020-02-26	6	21	1	blank	M	1	57	15	16	16	0	0	1	0	0	blank	3.Severe	3	0	0	1	NO	typical symptoms COVID-19	censored	1	0	1	0	0	0	0	0	0	0	0	0	0	0	9	2020-03-18	0	0	0	0
264	0	Center_02	110	0	2020-02-26	7	21	1	blank	M	1	57	16	16	16	0	0	1	0	0	blank	3.Severe	3	0	0	1	NO	typical symptoms COVID-19	censored	1	0	1	0	0	0	0	0	0	0	0	0	0	0	9	2020-03-18	0	0	0	0
265	0	Center_02	110	0	2020-02-26	7	21	1	blank	M	1	57	16	16	16	0	0	1	0	0	blank	3.Severe	3	0	0	1	NO	typical symptoms COVID-19	censored	1	0	1	0	0	0	0	0	0	0	0	0	0	0	9	2020-03-18	0	0	0	0
266	0	Center_02	110	0	2020-02-26	8	21	0	blank	M	1	57	17	18	18	0	0	1	0	0	blank	3.Severe	3	0	0	1	NO	typical symptoms COVID-19	censored	1	0	1	0	0	0	0	0	0	0	0	0	0	0	9	2020-03-18	0	0	0	0
267	0	Center_02	110	0	2020-02-26	9	21	0	blank	M	1	57	18	18	18	0	0	1	0	0	blank	3.Severe	3	0	0	1	NO	typical symptoms COVID-19	censored	1	0	1	0	0	0	0	0	0	0	0	0	0	0	9	2020-03-18	0	0	0	0
268	0	Center_02	110	0	2020-02-26	10	21	0	blank	M	1	57	19	20	20	0	0	1	0	0	blank	3.Severe	3	0	0	1	NO	typical symptoms COVID-19	censored	1	0	1	0	0	0	0	0	0	0	0	0	0	0	9	2020-03-18	0	0	0	0
269	0	Center_02	110	0	2020-02-26	11	21	0	blank	M	1	57	20	20	20	0	0	1	0	0	blank	3.Severe	3	0	0	1	NO	typical symptoms COVID-19		0	0	0	0	0	0	0	0	0	0	0	0	0	0	9	2020-03-18	0	0	0	0
270	0	Center_02	110	0	2020-02-26	12	21	0	blank	M	1	57	21	22	22	0	0	1	0	0	blank	3.Severe	3	0	0	1	NO	typical symptoms COVID-19	censored	1	0	1	0	0	0	0	0	0	0	0	0	0	0	9	2020-03-18	0	0	0	0
271	0	Center_02	110	0	2020-02-26	13	21	0	blank	M	1	57	22	22	22	0	0	1	0	0	blank	3.Severe	3	0	0	1	NO	typical symptoms COVID-19		0	0	0	0	0	0	0	0	0	0	0	0	0	0	9	2020-03-18	0	0	0	0
272	0	Center_02	110	0	2020-02-26	16	21	0	blank	M	1	57	25	26	26	0	0	1	0	0	blank	3.Severe	3	0	0	1	NO	typical symptoms COVID-19	censored	1	0	1	0	0	0	0	0	0	0	0	0	0	0	9	2020-03-18	0	0	0	0
273	0	Center_02	110	0	2020-02-26	17	21	0	blank	M	1	57	26	26	26	0	0	1	0	0	blank	3.Severe	3	0	0	1	NO	typical symptoms COVID-19	censored	1	0	1	0	0	0	0	0	0	0	0	0	0	0	9	2020-03-18	0	0	0	0
274	0	Center_02	110	0	2020-02-26	20	21	0	blank	M	1	57	28	28	28	0	0	1	0	0	blank	3.Severe	3	0	0	1	NO	typical symptoms COVID-19	censored	1	0	1	0	0	0	0	0	0	0	0	0	0	0	9	2020-03-18	0	0	0	0
275	0	Center_02	111	1	2020-03-07	0	20	1	blank	F	0	75	7	7	8	1	0	1	0	0	blank	3.Severe	3	0	0	1	NO	typical symptoms COVID-19	censored	1	1	0	0	0	1	0	0	0	0	0	0	0	0	7	2020-03-27	0	0	0	0
276	0	Center_02	112	1	2020-03-07	0		1	blank	M	1	52	9	9	10	0	0	1	0	0	blank	3.Severe	3	0	0	1	NO	Severe symptoms COVID-19	censored	1	0	1	0	0	0	0	0	0	0	0	0	0	0	NA	2020-05-20	0	0	0	0
277	0	Center_02	113	1	2020-03-07	0	24	1	blank	M	1	56	1	1	2	1	0	1	0	0	blank	3.Severe	3	0	0	1	NO	typical symptoms COVID-19	censored	1	0	1	0	0	0	0	0	0	1	0	0	0	0	0	2020-03-31	0	0	0	0
278	0	Center_02	114	1	2020-03-08	0	6	1	blank	M	1	73	5	5	6	1	0	1	0	0	blank	4.Critical/Fatal	5	1	1	1	NO	typical symptoms COVID-19	censored	1	0	1	1	0	0	0	0	1	0	0	0	0	0	NA		2020-03-14	1	1	1
279	0	Center_02	115	1	2020-03-08	0	5	1	blank	M	1	57	10	10	10	0	0	1	0	0	blank	4.Critical/Fatal	5	1	1	1	NO	typical symptoms COVID-19	censored	1	1	0	0	0	0	0	0	0	0	0	0	0	0	10		2020-03-13	1	1	1
280	0	Center_02	116	1	2020-03-08	0	1	1	blank	M	1	84	7	7	8	1	0	1	0	0	blank	4.Critical/Fatal	5	1	1	1	NO	typical symptoms COVID-19	censored	1	1	0	0	0	0	0	0	0	0	0	0	0	0	7		2020-03-09	1	1	1
281	0	Center_02	117	1	2020-03-08	0	0	1	blank	M	1	57	2	2	2	1	1	0	0	1	blank	1.Mild	1	0	0	0	NO	Mild symptoms COVID-19		0	0	0	0	0	0	0	0	0	0	0	0	0	0	X	2020-03-08	0	0	0	0
282	0	Center_02	118	1	2020-03-08	0	2	1	blank	M	1	89	7	7	8	1	0	1	0	0	blank	4.Critical/Fatal	5	1	1	1	NO	typical symptoms COVID-19	censored	1	0	1	0	0	1	0	0	0	0	0	0	0	0	7		2020-03-10	1	1	1
283	0	Center_02	119	1	2020-03-08	0	8	1	blank	M	1	86	3	3	4	1	0	1	0	0	DIED	4.Critical/Fatal	5	1	1	1	NO	typical symptoms COVID-19	censored	1	0	0	0	1	0	0	0	0	0	0	0	0	0	3		2020-03-16	1	1	1
284	0	Center_02	120	1	2020-03-08	0		1	blank	F	0	68	7	7	8	1	0	0	1	1	blank	4.Critical/Fatal	5	1	1	1	NO	typical symptoms COVID-19	censored	1	0	0	0	0	0	0	0	0	0	0	0	1	0	7		2020-03-28	1	1	1
285	0	Center_02	121	1	2020-02-27	0	8	1	blank	M	1	69	4	4	4	1	0	0	1	1	blank	4.Critical/Fatal	4	1	1	1	NO	NO SYMPTOMS	censored	1	0	1	1	0	0	0	1	0	0	0	0	0	0	0	2020-03-06	0	0	1	1
286	0	Center_02	122	1	2020-03-08	0	10	1	blank	M	1	49	8	8	8	0	0	1	0	0	blank	3.Severe	3	0	0	1	NO	typical symptoms COVID-19		0	0	0	0	0	0	0	0	0	0	0	0	0	0	NA	2020-03-18	0	0	0	0
287	0	Center_02	122	0	2020-03-08	4	10	1	blank	M	1	49	12	12	12	0	0	1	0	0	blank	3.Severe	3	0	0	1	NO	typical symptoms COVID-19		0	0	0	0	0	0	0	0	0	0	0	0	0	0	NA	2020-03-18	0	0	0	0
288	0	Center_02	122	0	2020-03-08	7	10	1	blank	M	1	49	15	16	16	0	0	1	0	0	blank	3.Severe	3	0	0	1	NO	typical symptoms COVID-19		0	0	0	0	0	0	0	0	0	0	0	0	0	0	NA	2020-03-18	0	0	0	0
289	0	Center_02	122	0	2020-03-08	9	10	0	blank	M	1	49	17	18	18	0	0	1	0	0	blank	3.Severe	3	0	0	1	NO	typical symptoms COVID-19		0	0	0	0	0	0	0	0	0	0	0	0	0	0	NA	2020-03-18	0	0	0	0
290	0	Center_02	123	1	2020-03-08	0	2	1	blank	M	1	82	5	5	6	1	0	1	0	0	DIED	4.Critical/Fatal	5	1	1	1	NO	typical symptoms COVID-19		0	0	0	0	0	0	0	0	0	0	0	0	0	0	NA		2020-03-10	1	1	1
291	0	Center_02	124	1	2020-03-08	0	8	1	blank	M	1	68	7	7	8	1	0	1	0	0	blank	3.Severe	3	0	0	1	NO	typical symptoms COVID-19	censored	1	0	1	0	1	1	0	0	0	0	0	0	0	0	7	2020-03-16	0	0	0	0
292	0	Center_02	125	1	2020-03-08	0	8	1	blank	M	1	63	3	3	4	1	0	1	0	0	blank	3.Severe	3	0	0	1	NO	Mild symptoms COVID-19	censored	1	0	0	0	0	0	0	0	0	0	0	0	1	0	0	2020-03-16	0	0	0	0
293	0	Center_02	126	1	2020-03-08	0	3	1	blank	M	1	81	10	10	10	0	0	1	0	0	DIED	4.Critical/Fatal	5	1	1	1	NO	typical symptoms COVID-19	censored	1	1	1	1	0	0	0	0	1	1	0	0	0	0	NA		2020-03-11	1	1	1
294	0	Center_02	126	0	2020-03-08	2	3	1	blank	M	1	81	12	12	12	0	0	1	0	0	DIED	4.Critical/Fatal	5	1	1	1	NO	typical symptoms COVID-19	censored	1	1	1	1	0	0	0	0	1	1	0	0	0	0	NA		2020-03-11	1	1	1
295	0	Center_02	127	1	2020-03-08	0	5	1	blank	M	1	52	7	7	8	1	0	1	0	0	blank	2.Moderate	2	0	0	0	NO	typical symptoms COVID-19	0	0	0	0	0	0	0	0	0	0	0	0	0	0	0	7	2020-03-13	0	0	0	0
296	0	Center_02	127	0	2020-03-08	4	5	1	blank	M	1	52	11	11	12	0	0	1	0	0	blank	2.Moderate	2	0	0	0	NO	typical symptoms COVID-19	0	0	0	0	0	0	0	0	0	0	0	0	0	0	0	7	2020-03-13	0	0	0	0
297	0	Center_02	128	1	2020-03-08	0	5	1	blank	M	1	78	5	5	6	1	0	1	0	0	DIED	4.Critical/Fatal	5	1	1	1	NO	typical symptoms COVID-19	censored	1	1	1	1	0	0	0	1	0	0	0	0	0	0	NA		2020-03-13	1	1	1
298	0	Center_02	129	1	2020-03-08	0	0	1	blank	M	1	84	3	3	4	1	1	0	0	1	blank	1.Mild	1	0	0	0	NO	Mild symptoms COVID-19		0	0	0	0	0	0	0	0	0	0	0	0	0	0	NA	2020-03-08	0	0	0	0
299	0	Center_02	130	1	2020-03-08	0	7	1	blank	M	1	73	7	7	8	1	0	1	0	0	DIED	4.Critical/Fatal	5	1	1	1	NO	typical symptoms COVID-19	censored	1	0	1	1	0	0	0	0	0	0	0	0	0	0	7		2020-03-15	1	1	1
300	0	Center_02	131	1	2020-03-08	0	6	1	blank	M	1	90	3	3	4	1	0	1	0	0	blank	4.Critical/Fatal	5	1	1	1	NO	typical symptoms COVID-19	censored	1	1	0	0	0	1	0	0	0	0	1	0	1	0	3		2020-03-14	1	1	1
301	0	Center_02	132	1	2020-02-22	0	3	1	blank	M	1	84	7	7	8	1	0	1	0	0	DIED	4.Critical/Fatal	5	1	1	1	NO	typical symptoms COVID-19	censored	1	0	0	0	0	1	0	0	0	0	0	0	0	0	7		2020-02-25	1	1	1
302	0	Center_02	133	1	2020-02-27	0	9	1	blank	M	1	62	3	3	4	1	0	1	0	0	DIED	4.Critical/Fatal	5	1	1	1	NO	typical symptoms COVID-19	censored	1	1	1	0	0	0	1	0	0	0	0	0	0	0	3		2020-03-07	1	1	1
303	0	Center_02	134	1	2020-03-08	0	3	1	blank	M	1	80	15	16	16	0	0	1	0	0	DIED	4.Critical/Fatal	5	1	1	1	NO	typical symptoms COVID-19	censored	1	1	0	0	0	0	0	0	0	0	0	0	0	0	0		2020-03-11	1	1	1
304	0	Center_02	134	0	2020-03-08	2	3	1	blank	M	1	80	2	2	2	1	0	1	0	0	DIED	4.Critical/Fatal	5	1	1	1	NO	typical symptoms COVID-19	censored	1	1	0	0	0	0	0	0	0	0	0	0	0	0	0		2020-03-11	1	1	1
305	0	Center_02	134	0	2020-03-08	3	3	1	blank	M	1	80	3	3	4	1	0	1	0	0	DIED	4.Critical/Fatal	5	1	1	1	NO	typical symptoms COVID-19	censored	1	1	0	0	0	0	0	0	0	0	0	0	0	0	0		2020-03-11	1	1	1
306	0	Center_02	135	1	2020-03-08	0	9	1	blank	M	1	66	7	7	8	1	0	1	0	0	blank	3.Severe	3	0	0	1	NO	Typical symptoms COVID-19	censored	1	0	1	0	0	0	0	0	0	0	0	0	1	0	7	2020-03-17	0	0	0	0
307	0	Center_02	136	1	2020-03-08	0	14	1	blank	M	1	61	5	5	6	1	0	1	0	0	blank	3.Severe	3	0	0	1	NO	Typical symptoms COVID-19	0	0	0	0	0	0	0	0	0	0	0	0	0	0	0	5	2020-03-22	0	0	0	0
308	0	Center_02	136	0	2020-03-08	5	14	1	blank	M	1	61	10	10	10	0	0	1	0	0	blank	3.Severe	3	0	0	1	NO	Typical symptoms COVID-19	0	0	0	0	0	0	0	0	0	0	0	0	0	0	0	5	2020-03-22	0	0	0	0
309	0	Center_02	136	0	2020-03-08	7	14	1	blank	M	1	61	12	12	12	0	0	1	0	0	blank	3.Severe	3	0	0	1	NO	Typical symptoms COVID-19	0	0	0	0	0	0	0	0	0	0	0	0	0	0	0	5	2020-03-22	0	0	0	0
310	0	Center_02	136	0	2020-03-08	8	14	0	blank	M	1	61	13	13	14	0	0	1	0	0	blank	3.Severe	3	0	0	1	NO	Typical symptoms COVID-19	0	0	0	0	0	0	0	0	0	0	0	0	0	0	0	5	2020-03-22	0	0	0	0
311	0	Center_02	136	0	2020-03-08	9	14	0	blank	M	1	61	14	14	14	0	0	1	0	0	blank	3.Severe	3	0	0	1	NO	Typical symptoms COVID-19	0	0	0	0	0	0	0	0	0	0	0	0	0	0	0	5	2020-03-22	0	0	0	0
312	0	Center_02	136	0	2020-03-08	10	14	0	blank	M	1	61	15	16	16	0	0	1	0	0	blank	3.Severe	3	0	0	1	NO	Typical symptoms COVID-19	0	0	0	0	0	0	0	0	0	0	0	0	0	0	0	5	2020-03-22	0	0	0	0
313	0	Center_02	136	0	2020-03-08	11	14	0	blank	M	1	61	16	16	16	0	0	1	0	0	blank	3.Severe	3	0	0	1	NO	Typical symptoms COVID-19	0	0	0	0	0	0	0	0	0	0	0	0	0	0	0	5	2020-03-22	0	0	0	0
314	0	Center_02	136	0	2020-03-08	12	14	0	blank	M	1	61	17	18	18	0	0	1	0	0	blank	3.Severe	3	0	0	1	NO	Typical symptoms COVID-19	0	0	0	0	0	0	0	0	0	0	0	0	0	0	0	5	2020-03-22	0	0	0	0
315	0	Center_02	136	0	2020-03-08	13	14	0	blank	M	1	61	18	18	18	0	0	1	0	0	blank	3.Severe	3	0	0	1	NO	Typical symptoms COVID-19	0	0	0	0	0	0	0	0	0	0	0	0	0	0	0	5	2020-03-22	0	0	0	0
316	0	Center_02	136	0	2020-03-08	14	14	0	blank	M	1	61	19	20	20	0	0	1	0	0	blank	3.Severe	3	0	0	1	NO	Typical symptoms COVID-19	0	0	0	0	0	0	0	0	0	0	0	0	0	0	0	5	2020-03-22	0	0	0	0
317	0	Center_02	137	1	2020-03-08	0	5	1	blank	M	1	82	7	7	8	1	0	1	0	0	DIED	4.Critical/Fatal	5	1	1	1	NO	Typical symptoms COVID-19	censored	1	0	1	0	0	0	0	0	0	0	0	0	0	0	7		2020-03-13	1	1	1
318	0	Center_02	137	0	2020-03-08	1	5	1	blank	M	1	82	8	8	8	0	0	1	0	0	DIED	4.Critical/Fatal	5	1	1	1	NO	Typical symptoms COVID-19	censored	1	0	1	0	0	0	0	0	0	0	0	0	0	0	7		2020-03-13	1	1	1
319	0	Center_02	137	0	2020-03-08	2	5	1	blank	M	1	82	9	9	10	0	0	1	0	0	DIED	4.Critical/Fatal	5	1	1	1	NO	Typical symptoms COVID-19	censored	1	0	1	0	0	0	0	0	0	0	0	0	0	0	7		2020-03-13	1	1	1
320	0	Center_02	137	0	2020-03-08	4	5	1	blank	M	1	82	11	11	12	0	0	1	0	0	DIED	4.Critical/Fatal	5	1	1	1	NO	Typical symptoms COVID-19	censored	1	0	1	0	0	0	0	0	0	0	0	0	0	0	7		2020-03-13	1	1	1
321	0	Center_02	138	1	2020-03-08	0	6	1	blank	M	1	67	7	7	8	1	0	1	0	0	blank	3.Severe	3	0	0	1	NO	Typical symptoms COVID-19	censored	1	1	0	0	0	0	0	0	0	0	0	0	0	0	7	2020-03-14	0	0	0	0
322	0	Center_02	139	1	2020-03-08	0		1	blank	F	0	69	3	3	4	1	0	1	0	0	blank	3.Severe	3	0	0	1	NO	typical symptoms COVID-19		0	0	0	0	0	0	0	0	0	0	0	0	0	0	3	2020-05-01	0	0	0	0
323	0	Center_02	140	1	2020-03-08	0	8	1	blank	M	1	47	4	4	4	1	0	1	0	0	blank	3.Severe	3	0	0	1	NO	typical symptoms COVID-19		0	0	0	0	0	0	0	0	0	0	0	0	0	0	4	2020-03-16	0	0	0	0
324	0	Center_02	140	0	2020-03-08	2	8	1	blank	M	1	47	6	6	6	1	0	1	0	0	blank	3.Severe	3	0	0	1	NO	typical symptoms COVID-19		0	0	0	0	0	0	0	0	0	0	0	0	0	0	4	2020-03-16	0	0	0	0
325	0	Center_02	140	0	2020-03-08	6	8	1	blank	M	1	47	10	10	10	0	0	1	0	0	blank	3.Severe	3	0	0	1	NO	typical symptoms COVID-19		0	0	0	0	0	0	0	0	0	0	0	0	0	0	4	2020-03-16	0	0	0	0
326	0	Center_02	141	1	2020-03-09	0	0	1	blank	F	0	47	3	3	4	1	1	0	0	1	blank	1.Mild	1	0	0	0	NO	Mild symptoms COVID-19		0	0	0	0	0	0	0	0	0	0	0	0	0	0	NA	2020-03-09	0	0	0	0
327	0	Center_02	142	1	2020-03-09	0		1	blank	M	1	71	8	8	8	0	0	0	1	1	blank	4.Critical/Fatal	4	1	1	1	NO	typical symptoms COVID-19	0	0	0	0	0	0	0	0	0	0	0	0	0	0	0	8	2020-03-13	0	0	1	1
328	0	Center_02	143	1	2020-03-09	0	2	1	blank	M	1	74	6	6	6	1	0	0	1	1	DIED	4.Critical/Fatal	5	1	1	1	NO	severe symptoms COVID-19	censored	1	0	0	0	0	1	0	0	0	0	0	0	0	0	6		2020-03-11	1	1	1
329	0	Center_02	144	1	2020-02-27	0		1	blank	M	1	36	7	7	8	1	0	1	0	0	blank	3.Severe	3	0	0	1	NO	typical symptoms COVID-19	censored	1	0	1	0	0	0	0	0	0	0	0	0	0	0	7	2020-05-05	0	0	0	0
330	0	Center_02	145	1	2020-03-09	0	2	1	blank	M	1	49	10	10	10	0	0	1	0	0	blank	2.Moderate	2	0	0	0	NO	typical symptoms COVID-19	censored	1	0	0	0	0	0	0	0	0	0	0	0	1	0	10	2020-03-11	0	0	0	0
331	0	Center_02	146	1	2020-03-09	0	9	1	blank	M	1	54	8	8	8	0	0	1	0	0	blank	3.Severe	3	0	0	1	NO	typical symptoms COVID-19	0	0	0	0	0	0	0	0	0	0	0	0	0	0	0	8	2020-03-18	0	0	0	0
332	0	Center_02	147	1	2020-03-09	0	21	1	blank	F	0	89	10	10	10	0	0	1	0	0	blank	4.Critical/Fatal	5	1	1	1	NO	typical symptoms COVID-19	censored	1	0	1	0	0	0	0	0	0	0	0	0	0	0	10		2020-03-30	1	1	1
333	0	Center_02	148	1	2020-03-09	0	0	1	blank	M	1	77	7	7	8	1	0	1	0	0	DIED	4.Critical/Fatal	5	1	1	1	NO	typical symptoms COVID-19	censored	1	0	1	0	0	0	0	0	0	1	1	0	0	0	7		2020-03-09	1	1	1
334	0	Center_02	149	1	2020-03-09	0	22	1	blank	M	1	76	6	6	6	1	0	1	0	0	blank	3.Severe	3	0	0	1	NO	typical symptoms COVID-19	0	0	0	0	0	0	0	0	0	0	0	0	0	0	0	6	2020-03-31	0	0	0	0
335	0	Center_02	150	1	2020-03-10	0		1	blank	M	1	56	6	6	6	1	0	0	1	1	blank	4.Critical/Fatal	4	1	1	1	NO	severe symptoms COVID-19		0	0	0	0	0	0	0	0	0	0	0	0	0	0	NA	2020-03-18	0	0	1	1
336	0	Center_02	151	1	2020-03-10	0	15	1	blank	M	1	64	5	5	6	1	0	0	1	1	blank	4.Critical/Fatal	4	1	1	1	NO	typical symptoms COVID-19	censored	1	1	1	0	0	0	0	0	0	0	0	0	0	0	5	2020-03-25	0	0	1	1
337	0	Center_02	152	1	2020-02-27	0	0	1	blank	M	1	66	2	1	2	1	1	0	0	1	blank	1.Mild	1	0	0	0	NO	Mild symptoms COVID-19	0	0	0	0	0	0	0	0	0	0	0	0	0	0	0	0	2020-02-27	0	0	0	0
338	0	Center_02	153	1	2020-02-27	0	0	1	blank	M	1	96	1	1	2	1	1	0	0	1	blank	1.Mild	1	0	0	0	NO	NO SYMPTOMS	censored	1	0	0	0	0	0	0	1	0	0	0	0	0	0	0	2020-02-27	0	0	0	0
339	0	Center_02	154	1	2020-02-27	0		1	blank	M	1	60	7	7	8	1	0	1	0	0	blank	3.Severe	3	0	0	1	NO	typical symptoms COVID-19	censored	1	0	1	0	0	0	0	0	0	0	0	0	0	0	7	2020-04-05	0	0	0	0
340	0	Center_02	155	1	2020-02-27	0	14	1	blank	F	0	84	1	1	2	1	0	1	0	0	blank	3.Severe	3	0	0	1	NO	typical symptoms COVID-19	censored	1	0	1	0	0	0	0	0	1	0	0	0	1	0	NA	2020-03-12	0	0	0	0
341	0	Center_02	156	1	2020-02-27	0	6	1	blank	F	0	72	8	8	8	0	0	1	0	0	blank	3.Severe	3	0	0	1	NO	typical symptoms COVID-19	0	0	0	0	0	0	0	0	0	0	0	0	0	0	0	8	2020-03-04	0	0	0	0
342	0	Center_02	157	1	2020-02-28	0	5	1	blank	M	1	81	1	1	2	1	0	0	1	1	DIED	4.Critical/Fatal	5	1	1	1	NO	severe symptoms COVID-19	censored	1	1	1	1	1	1	0	0	0	0	0	0	0	0	NA		2020-03-04	1	1	1
343	0	Center_02	158	1	2020-02-28	0	0	1	blank	M	1	54	2	2	2	1	1	0	0	1	blank	1.Mild	1	0	0	0	NO	Mild symptoms COVID-19		0	0	0	0	0	0	0	0	0	0	0	0	0	0	NA	2020-02-28	0	0	0	0
344	0	Center_02	159	1	2020-02-28	0	6	1	blank	M	1	71	8	8	8	0	0	1	0	0	blank	3.Severe	3	0	0	1	NO	typical symptoms COVID-19		0	0	0	0	0	0	0	0	0	0	0	0	0	0	NA	2020-03-05	0	0	0	0
345	0	Center_02	160	1	2020-02-23	0	1	1	blank	M	1	37	7	7	8	1	0	1	0	0	blank	2.Moderate	2	0	0	0	NO	NO SYMPTOMS	0	0	0	0	0	0	0	0	0	0	0	0	0	0	0	0	2020-02-23	0	0	0	0
346	0	Center_02	161	1	2020-02-28	0	19	1	blank	F	0	81	4	4	4	1	0	1	0	0	blank	4.Critical/Fatal	5	1	1	1	NO	typical symptoms COVID-19	censored	1	0	1	0	0	0	0	0	0	0	0	0	0	0	4		2020-03-18	1	1	1
347	0	Center_02	162	1	2020-02-28	0	4	1	blank	F	0	90	6	6	6	1	0	1	0	0	DIED	4.Critical/Fatal	5	1	1	1	NO	typical symptoms COVID-19		0	0	0	0	0	0	0	0	0	0	0	0	0	0	NA		2020-03-03	1	1	1
348	0	Center_02	163	1	2020-02-28	0	6	1	blank	F	0	50	6	6	6	1	0	1	0	0	blank	3.Severe	3	0	0	1	NO	typical symptoms COVID-19	censored	1	1	0	0	0	0	0	0	0	0	0	0	0	0	6	2020-03-05	0	0	0	0
349	0	Center_02	164	1	2020-02-28	0	28	1	blank	M	1	68	6	6	6	1	0	0	1	1	blank	4.Critical/Fatal	5	1	1	1	NO	NA		0	0	0	0	0	0	0	0	0	0	0	0	0	0	NA		2020-03-27	1	1	1
350	0	Center_02	165	1	2020-02-28	0		1	blank	F	0	56	3	3	4	1	0	0	1	1	blank	4.Critical/Fatal	4	1	1	1	NO	NA		0	0	0	0	0	0	0	0	0	0	0	0	0	0	NA	2020-04-07	0	0	1	1
351	0	Center_02	166	1	2020-02-28	0	7	1	blank	M	1	74	3	3	4	1	0	1	0	0	DIED	4.Critical/Fatal	5	1	1	1	NO	typical symptoms COVID-19		0	0	0	0	0	0	0	0	0	0	0	0	0	0	3		2020-03-06	1	1	1
352	0	Center_02	167	1	2020-02-28	0	0	1	blank	M	1	55	7	7	8	1	1	0	0	1	blank	1.Mild	1	0	0	0	NO	Mild symptoms COVID-19	censored	1	1	0	0	0	0	0	0	0	0	0	0	0	0	7	2020-02-28	0	0	0	0
353	0	Center_02	168	1	2020-02-28	0	0	1	blank	M	1	59	3	3	4	1	1	0	0	1	blank	1.Mild	1	0	0	0	NO	Mild symptoms COVID-19		0	0	0	0	0	0	0	0	0	0	0	0	0	0	NA	2020-02-28	0	0	0	0
354	CMML	Center_02	169	1	2020-02-29	0	6	1	blank	M	1	76	4	4	4	1	0	1	0	0	blank	3.Severe	3	0	0	1	NO	typical symptoms COVID-19	censored	1	0	1	0	1	0	1	0	0	0	1	0	1	0	4	2020-03-06	0	0	0	0
355	0	Center_02	170	1	2020-02-29	0	1	1	blank	M	1	81	3	3	4	1	0	1	0	0	DIED	2.Moderate	2	0	0	0	NO	typical symptoms COVID-19	censored	1	0	1	1	0	0	0	0	0	1	0	0	0	0	3	2020-02-29	0	0	0	0
356	0	Center_02	171	1	2020-02-24	0	10	1	blank	M	1	73	10	10	10	0	0	1	0	0	sepsis bac?	3.Severe	3	0	0	1	NO	Mild symptoms COVID-19	censored	1	0	0	1	0	1	0	0	0	0	0	0	0	0	NA	2020-03-05	0	0	0	0
357	0	Center_02	172	1	2020-02-29	0	1	1	blank	M	1	87	7	7	8	1	0	1	0	0	blank	2.Moderate	2	0	0	0	NO	typical symptoms COVID-19	censored	1	1	1	0	0	0	1	0	0	0	1	0	0	0	7	2020-02-29	0	0	0	0
358	0	Center_02	173	1	2020-02-29	0	5	1	blank	M	1	57	10	10	10	0	0	1	0	0	DIED	4.Critical/Fatal	5	1	1	1	NO	typical symptoms COVID-19		0	0	0	0	0	0	0	0	0	0	0	0	0	0	NA		2020-03-05	1	1	1
359	0	Center_02	174	1	2020-02-29	0	1	1	blank	M	1	65	3	3	4	1	0	1	0	0	blank	2.Moderate	2	0	0	0	NO	typical symptoms COVID-19	censored	1	0	1	1	0	0	0	0	0	0	0	0	0	0	3	2020-02-29	0	0	0	0
360	0	Center_02	175	1	2020-02-29	0	5	1	blank	F	0	91	1	1	2	1	0	1	0	0	DIED	4.Critical/Fatal	5	1	1	1	NO	typical symptoms COVID-19	censored	1	0	0	1	0	0	0	0	0	0	0	0	0	0	NA		2020-03-05	1	1	1
361	0	Center_02	176	1	2020-02-29	0	1	1	blank	F	0	67	9	9	10	0	0	1	0	0	blank	2.Moderate	2	0	0	0	NO	typical symptoms COVID-19	censored	1	1	0	0	0	1	0	0	0	0	0	0	0	0	9	2020-02-29	0	0	0	0
362	0	Center_02	177	1	2020-02-29	0	18	1	blank	F	0	64	4	4	4	1	0	1	0	0	blank	3.Severe	3	0	0	1	NO	typical symptoms COVID-19	censored	1	0	0	1	0	0	0	0	0	0	0	0	1	0	NA	2020-03-18	0	0	0	0
363	0	Center_02	178	1	2020-02-29	0	3	1	blank	M	1	67	0	1	2	1	0	1	0	0	DIED	4.Critical/Fatal	5	1	1	1	NO	typical symptoms COVID-19	censored	1	0	0	1	0	0	1	0	0	0	0	0	0	0	0		2020-03-03	1	1	1
364	0	Center_02	179	1	2020-02-29	0	16	1	blank	M	1	75	10	10	10	0	0	1	0	0	blank	3.Severe	3	0	0	1	NO	typical symptoms COVID-19	censored	1	1	1	0	0	0	0	0	0	0	0	0	0	0	10	2020-03-16	0	0	0	0
365	0	Center_02	179	0	2020-02-29	2	16	1	blank	M	1	75	12	12	12	0	0	1	0	0	blank	3.Severe	3	0	0	1	NO	typical symptoms COVID-19	censored	1	1	1	0	0	0	0	0	0	0	0	0	0	0	10	2020-03-16	0	0	0	0
366	0	Center_02	179	0	2020-02-29	3	16	1	blank	M	1	75	13	13	14	0	0	1	0	0	blank	3.Severe	3	0	0	1	NO	typical symptoms COVID-19	censored	1	1	1	0	0	0	0	0	0	0	0	0	0	0	10	2020-03-16	0	0	0	0
367	0	Center_02	179	0	2020-02-29	5	16	1	blank	M	1	75	15	16	16	0	0	1	0	0	blank	3.Severe	3	0	0	1	NO	typical symptoms COVID-19	censored	1	1	1	0	0	0	0	0	0	0	0	0	0	0	10	2020-03-16	0	0	0	0
368	0	Center_02	179	0	2020-02-29	6	16	1	blank	M	1	75	16	16	16	0	0	1	0	0	blank	3.Severe	3	0	0	1	NO	typical symptoms COVID-19	censored	1	1	1	0	0	0	0	0	0	0	0	0	0	0	10	2020-03-16	0	0	0	0
369	0	Center_02	179	0	2020-02-29	6	16	1	blank	M	1	75	16	16	16	0	0	1	0	0	blank	3.Severe	3	0	0	1	NO	typical symptoms COVID-19	censored	1	1	1	0	0	0	0	0	0	0	0	0	0	0	10	2020-03-16	0	0	0	0
370	0	Center_02	179	0	2020-02-29	7	16	1	blank	M	1	75	17	18	18	0	0	1	0	0	blank	3.Severe	3	0	0	1	NO	typical symptoms COVID-19	censored	1	1	1	0	0	0	0	0	0	0	0	0	0	0	10	2020-03-16	0	0	0	0
371	0	Center_02	179	0	2020-02-29	8	16	0	blank	M	1	75	18	18	18	0	0	1	0	0	blank	3.Severe	3	0	0	1	NO	typical symptoms COVID-19	censored	1	1	1	0	0	0	0	0	0	0	0	0	0	0	10	2020-03-16	0	0	0	0
372	0	Center_02	179	0	2020-02-29	9	16	0	blank	M	1	75	19	20	20	0	0	1	0	0	blank	3.Severe	3	0	0	1	NO	typical symptoms COVID-19	censored	1	1	1	0	0	0	0	0	0	0	0	0	0	0	10	2020-03-16	0	0	0	0
373	0	Center_02	179	0	2020-02-29	10	16	0	blank	M	1	75	20	20	20	0	0	1	0	0	blank	3.Severe	3	0	0	1	NO	typical symptoms COVID-19	censored	1	1	1	0	0	0	0	0	0	0	0	0	0	0	10	2020-03-16	0	0	0	0
374	0	Center_02	179	0	2020-02-29	11	16	0	blank	M	1	75	21	22	22	0	0	1	0	0	blank	3.Severe	3	0	0	1	NO	typical symptoms COVID-19	censored	1	1	1	0	0	0	0	0	0	0	0	0	0	0	10	2020-03-16	0	0	0	0
375	0	Center_02	179	0	2020-02-29	12	16	0	blank	M	1	75	22	22	22	0	0	1	0	0	blank	3.Severe	3	0	0	1	NO	typical symptoms COVID-19		0	0	0	0	0	0	0	0	0	0	0	0	0	0	10	2020-03-16	0	0	0	0
376	0	Center_02	179	0	2020-02-29	13	16	0	blank	M	1	75	23	24	24	0	0	1	0	0	blank	3.Severe	3	0	0	1	NO	typical symptoms COVID-19	censored	1	1	1	0	0	0	0	0	0	0	0	0	0	0	10	2020-03-16	0	0	0	0
377	0	Center_02	179	0	2020-02-29	14	16	0	blank	M	1	75	24	24	24	0	0	1	0	0	blank	3.Severe	3	0	0	1	NO	typical symptoms COVID-19	censored	1	1	1	0	0	0	0	0	0	0	0	0	0	0	10	2020-03-16	0	0	0	0
378	0	Center_02	179	0	2020-02-29	15	16	0	blank	M	1	75	25	26	26	0	0	1	0	0	blank	3.Severe	3	0	0	1	NO	typical symptoms COVID-19	censored	1	1	1	0	0	0	0	0	0	0	0	0	0	0	10	2020-03-16	0	0	0	0
379	0	Center_02	179	0	2020-02-29	16	16	0	blank	M	1	75	26	26	26	0	0	1	0	0	blank	3.Severe	3	0	0	1	NO	typical symptoms COVID-19	censored	1	1	1	0	0	0	0	0	0	0	0	0	0	0	10	2020-03-16	0	0	0	0
380	0	Center_02	180	1	2020-03-01	0	24	1	blank	M	1	67	7	7	8	1	0	0	1	1	blank	4.Critical/Fatal	5	1	1	1	NO	severe symptoms COVID-19	censored	1	0	1	0	0	0	0	0	0	0	0	0	0	0	7		2020-03-25	1	1	1
381	0	Center_02	181	1	2020-03-01	0	12	1	blank	M	1	36	4	4	4	1	0	1	0	0	blank	3.Severe	3	0	0	1	NO	typical symptoms COVID-19	censored	1	0	0	0	0	0	0	0	0	1	0	0	1	0	4	2020-03-13	0	0	0	0
382	0	Center_02	182	1	2020-02-24	0	16	1	blank	M	1	67	7	7	8	1	0	1	0	0	blank	3.Severe	3	0	0	1	NO	typical symptoms COVID-19	censored	1	1	0	1	0	0	1	0	0	0	0	0	0	0	7	2020-03-11	0	0	0	0
383	0	Center_02	183	1	2020-03-01	0	15	1	blank	M	1	53	10	10	10	0	0	1	0	0	blank	3.Severe	3	0	0	1	NO	typical symptoms COVID-19	censored	1	0	1	0	0	0	0	0	0	0	0	0	0	0	10	2020-03-16	0	0	0	0
384	0	Center_02	184	1	2020-03-01	0	10	1	blank	F	0	74	7	7	8	1	0	1	0	0	blank	3.Severe	3	0	0	1	NO	typical symptoms COVID-19	censored	1	0	0	1	0	0	0	0	0	0	0	0	0	0	7	2020-03-11	0	0	0	0
385	0	Center_02	185	1	2020-03-01	0	17	1	blank	M	1	70	2	2	2	1	0	1	0	0	blank	3.Severe	3	0	0	1	NO	typical symptoms COVID-19	censored	1	0	1	1	0	0	0	1	0	0	0	0	0	0	2	2020-03-18	0	0	0	0
386	0	Center_02	186	1	2020-03-01	0	4	1	blank	F	0	76	6	6	6	1	0	1	0	0	DIED	4.Critical/Fatal	5	1	1	1	NO	typical symptoms COVID-19	censored	1	1	0	0	0	0	0	0	0	0	0	0	0	0	6		2020-03-05	1	1	1
387	0	Center_02	187	1	2020-03-01	0	14	1	blank	M	1	78	7	7	8	1	0	1	0	0	blank	3.Severe	3	0	0	1	NO	typical symptoms COVID-19	censored	1	0	1	0	0	0	0	0	0	0	0	0	0	0	7	2020-03-15	0	0	0	0
388	0	Center_02	188	1	2020-03-01	0	10	1	blank	M	1	70	5	5	6	1	0	0	1	1	DIED	4.Critical/Fatal	5	1	1	1	NO	typical symptoms COVID-19	censored	1	1	1	1	0	0	0	0	0	1	0	0	0	0	NA		2020-03-11	1	1	1
389	0	Center_02	189	1	2020-03-01	0	6	1	blank	M	1	93	7	7	8	1	0	1	0	0	DIED	4.Critical/Fatal	5	1	1	1	NO	typical symptoms COVID-19	censored	1	1	0	0	0	0	0	0	0	0	0	0	0	0	NA		2020-03-07	1	1	1
390	0	Center_02	189	0	2020-03-01	2	6	1	blank	M	1	93	9	9	10	0	0	1	0	0		4.Critical/Fatal	5	1	1	1	NO	typical symptoms COVID-19	censored	1	1	0	0	0	0	0	0	0	0	0	0	0	0	NA		2020-03-07	1	1	1
391	0	Center_02	189	0	2020-03-01	4	6	1	blank	M	1	93	11	11	12	0	0	1	0	0		4.Critical/Fatal	5	1	1	1	NO	typical symptoms COVID-19	censored	1	1	0	0	0	0	0	0	0	0	0	0	0	0	NA		2020-03-07	1	1	1
392	0	Center_02	190	1	2020-03-01	0	23	1	blank	F	0	50	4	4	4	1	0	1	0	0	blank	3.Severe	3	0	0	1	NO	typical symptoms COVID-19	censored	1	0	0	0	0	0	0	1	0	0	0	0	0	0	4	2020-03-24	0	0	0	0
393	0	Center_02	191	1	2020-03-01	0	11	1	blank	M	1	85	3	3	4	1	0	1	0	0	blank	3.Severe	3	0	0	1	NO	severe symptoms COVID-19	censored	1	0	0	1	0	0	0	0	0	0	0	0	0	0	3	2020-03-12	0	0	0	0
394	0	Center_02	192	1	2020-03-01	0	12	1	blank	F	0	74	14	14	14	0	0	1	0	0	blank	3.Severe	3	0	0	1	NO	typical symptoms COVID-19	censored	1	1	0	0	0	1	0	0	0	0	0	0	0	0	NA	2020-03-13	0	0	0	0
395	0	Center_02	193	1	2020-02-24	0	1	1	blank	M	1	53	5	5	6	1	0	1	0	0	blank	2.Moderate	2	0	0	0	NO	typical symptoms COVID-19		0	0	0	0	0	0	0	0	0	0	0	0	0	0	5	2020-02-24	0	0	0	0
396	0	Center_02	194	1	2020-03-01	0	4	1	blank	M	1	84	5	5	6	1	0	1	0	0	DIED	4.Critical/Fatal	5	1	1	1	NO	typical symptoms COVID-19	censored	1	1	0	1	0	0	0	0	0	0	0	0	1	0	5		2020-03-05	1	1	1
397	0	Center_02	195	1	2020-03-01	0		1	blank	M	1	58	3	3	4	1	0	1	0	0	blank	3.Severe	3	0	0	1	NO	typical symptoms COVID-19	0	0	0	0	0	0	0	0	0	0	0	0	0	0	0	3	2020-05-15	0	0	0	0
398	0	Center_02	196	1	2020-03-01	0	3	1	blank	M	1	91	5	5	6	1	0	1	0	0	DIED	4.Critical/Fatal	5	1	1	1	NO	typical symptoms COVID-19	censored	1	0	0	0	0	0	1	0	0	0	0	0	0	0	NA		2020-03-04	1	1	1
399	0	Center_02	197	1	2020-03-01	0		1	blank	M	1	54	2	2	2	1	0	1	0	0	blank	3.Severe	3	0	0	1	NO	typical symptoms COVID-19	censored	1	0	0	0	0	0	0	1	0	0	0	0	0	0	2	2020-05-02	0	0	0	0
400	0	Center_02	198	1	2020-03-02	0	17	1	blank	M	1	58	1	1	2	1	0	1	0	0	blank	3.Severe	3	0	0	1	NO	typical symptoms COVID-19	censored	1	0	0	0	0	0	0	0	0	0	0	0	1	0	1	2020-03-19	0	0	0	0
401	0	Center_02	199	1	2020-03-02	0		1	blank	M	1	77	5	5	6	1	0	0	1	1	blank	4.Critical/Fatal	4	1	1	1	NO	severe symptoms COVID-19	censored	1	1	1	0	0	0	0	0	0	0	0	0	0	0	NA	2020-05-08	0	0	1	1
402	0	Center_02	200	1	2020-03-02	0	6	1	blank	M	1	72	10	10	10	0	0	1	0	0	DIED	4.Critical/Fatal	5	1	1	1	NO	typical symptoms COVID-19	0	0	0	0	0	0	0	0	0	0	0	0	0	0	0	10		2020-03-08	1	1	1
403	0	Center_02	201	1	2020-03-02	0		1	blank	M	1	61	0	1	2	1	0	0	1	1	blank	4.Critical/Fatal	4	1	1	1	NO	severe symptoms COVID-19	censored	1	1	1	0	0	0	0	0	0	0	0	0	0	0	NA	yes	0	0	1	1
404	0	Center_02	202	1	2020-03-02	0	7	1	blank	M	1	76	2	2	2	1	0	0	1	1	DIED	4.Critical/Fatal	5	1	1	1	NO	typical symptoms COVID-19 and bacterial infection	censored	1	1	0	0	0	0	0	0	0	0	0	0	0	1	NA		2020-03-09	1	1	1
405	0	Center_02	203	1	2020-03-02	0		1	blank	M	1	43	6	6	6	1	0	0	1	1	blank	4.Critical/Fatal	4	1	1	1	NO	severe symptoms COVID-19		0	0	0	0	0	0	0	0	0	0	0	0	0	0	NA	2020-04-28	0	0	1	1
406	0	Center_02	204	1	2020-02-24	0	3	1	blank	F	0	69	15	16	16	0	0	1	0	0	blank	2.Moderate	2	0	0	0	NO	Mild symptoms COVID-19	censored	1	0	1	0	0	0	0	0	0	0	0	0	0	0	NA	2020-02-27	0	0	0	0
407	0	Center_02	205	1	2020-03-02	0		1	blank	M	1	57	8	8	8	0	0	1	0	0	blank	3.Severe	3	0	0	1	NO	typical symptoms COVID-19	censored	1	0	1	1	0	0	0	0	0	0	0	0	0	0	NA	2020-05-08	0	0	0	0
408	0	Center_02	206	1	2020-03-02	0	2	1	blank	M	1	48	7	7	8	1	0	1	0	0	blank	2.Moderate	2	0	0	0	NO	Mild symptoms COVID-19	censored	1	0	0	0	0	0	0	1	0	0	0	0	0	0	NA	2020-03-04	0	0	0	0
409	0	Center_02	207	1	2020-03-02	0	16	1	blank	M	1	62	10	10	10	0	0	1	0	0	blank	3.Severe	3	0	0	1	NO	typical symptoms COVID-19	censored	1	1	0	0	0	0	0	0	0	0	0	0	0	0	10	2020-03-18	0	0	0	0
410	0	Center_02	208	1	2020-03-02	0	12	1	blank	F	0	95	3	3	4	1	0	0	1	1	DIED	4.Critical/Fatal	5	1	1	1	NO	typical symptoms COVID-19	censored	1	1	0	0	0	0	0	0	0	0	0	0	0	0	NA		2020-03-14	1	1	1
411	0	Center_02	209	1	2020-03-02	0	19	1	blank	M	1	45	5	5	6	1	0	1	0	0	blank	3.Severe	3	0	0	1	NO	typical symptoms COVID-19		0	0	0	0	0	0	0	0	0	0	0	0	0	0	5	2020-03-21	0	0	0	0
412	0	Center_02	210	1	2020-03-02	0	15	1	blank	M	1	66	7	7	8	1	0	1	0	0	DIED	4.Critical/Fatal	5	1	1	1	NO	typical symptoms COVID-19	censored	1	1	0	0	0	0	1	0	0	0	0	0	0	0	NA		2020-03-17	1	1	1
413	0	Center_02	211	1	2020-03-02	0	36	1	blank	M	1	77	7	7	8	1	0	1	0	0	blank	3.Severe	3	0	0	1	NO	severe symptoms COVID-19	censored	1	1	1	0	0	1	0	0	1	0	0	0	0	0	7	2020-04-07	0	0	0	0
414	0	Center_02	212	1	2020-03-02	0	10	1	blank	M	1	67	2	2	2	1	0	0	1	1	blank	4.Critical/Fatal	4	1	1	1	NO	typical symptoms COVID-19	censored	1	0	0	0	0	0	0	0	0	0	0	0	0	0	NA	2020-03-12	0	0	1	1
415	0	Center_02	213	1	2020-03-02	0		1	blank	M	1	72	20	20	20	0	0	0	1	1	blank	4.Critical/Fatal	5	1	1	1	NO	typical symptoms COVID-19	censored	1	0	0	1	0	0	0	0	0	0	0	0	1	0	20		2020-03-11	1	1	1
416	0	Center_02	214	1	2020-03-02	0	7	1	blank	M	1	81	5	5	6	1	0	1	0	0	DIED	4.Critical/Fatal	5	1	1	1	NO	typical symptoms COVID-19	censored	1	1	0	0	0	1	0	0	0	1	1	0	0	0	NA		2020-03-09	1	1	1
417	0	Center_02	215	1	2020-02-25	0	17	1	blank	M	1	76	4	4	4	1	0	1	0	0	DIED	4.Critical/Fatal	5	1	1	1	NO	NO SYMPTOMS	censored	1	0	0	0	0	0	0	0	1	0	0	0	0	0	0		2020-03-13	1	1	1
418	0	Center_02	216	1	2020-03-02	0	9	1	blank	F	0	64	7	7	8	1	0	1	0	0	blank	3.Severe	3	0	0	1	NO	typical symptoms COVID-19	0	0	0	0	0	0	0	0	0	0	0	0	0	0	0	7	2020-03-11	0	0	0	0
419	0	Center_02	216	0	2020-03-02	2	9	1	blank	F	0	64	9	9	10	0	0	1	0	0	blank	3.Severe	3	0	0	1	NO	typical symptoms COVID-19	0	0	0	0	0	0	0	0	0	0	0	0	0	0	0	7	2020-03-11	0	0	0	0
420	0	Center_02	216	0	2020-03-02	3	9	1	blank	F	0	64	10	10	10	0	0	1	0	0	blank	3.Severe	3	0	0	1	NO	typical symptoms COVID-19	0	0	0	0	0	0	0	0	0	0	0	0	0	0	0	7	2020-03-11	0	0	0	0
421	0	Center_02	216	0	2020-03-02	4	9	1	blank	F	0	64	11	11	12	0	0	1	0	0	blank	3.Severe	3	0	0	1	NO	typical symptoms COVID-19	0	0	0	0	0	0	0	0	0	0	0	0	0	0	0	7	2020-03-11	0	0	0	0
422	0	Center_02	216	0	2020-03-02	6	9	1	blank	F	0	64	13	13	14	0	0	1	0	0	blank	3.Severe	3	0	0	1	NO	typical symptoms COVID-19	0	0	0	0	0	0	0	0	0	0	0	0	0	0	0	7	2020-03-11	0	0	0	0
423	0	Center_02	216	0	2020-03-02	7	9	1	blank	F	0	64	14	14	14	0	0	1	0	0	blank	3.Severe	3	0	0	1	NO	typical symptoms COVID-19	0	0	0	0	0	0	0	0	0	0	0	0	0	0	0	7	2020-03-11	0	0	0	0
424	0	Center_02	216	0	2020-03-02	9	9	0	blank	F	0	64	16	16	16	0	0	1	0	0	blank	3.Severe	3	0	0	1	NO	typical symptoms COVID-19	0	0	0	0	0	0	0	0	0	0	0	0	0	0	0	7	2020-03-11	0	0	0	0
425	0	Center_02	217	1	2020-03-02	0	9	1	blank	M	1	91	6	6	6	1	0	1	0	0	DIED	4.Critical/Fatal	5	1	1	1	NO	typical symptoms COVID-19	censored	1	0	1	1	0	0	0	0	0	0	0	0	0	0	6		2020-03-11	1	1	1
426	0	Center_02	217	0	2020-03-02	3	9	1	blank	M	1	91	9	9	10	0	0	1	0	0	DIED	4.Critical/Fatal	5	1	1	1	NO	typical symptoms COVID-19	censored	1	0	1	1	0	0	0	0	0	0	0	0	0	0	6		2020-03-11	1	1	1
427	0	Center_02	217	0	2020-03-02	5	9	1	blank	M	1	91	11	11	12	0	0	1	0	0	DIED	4.Critical/Fatal	5	1	1	1	NO	typical symptoms COVID-19	censored	1	0	1	1	0	0	0	0	0	0	0	0	0	0	6		2020-03-11	1	1	1
428	0	Center_02	217	0	2020-03-02	7	9	1	blank	M	1	91	13	13	14	0	0	1	0	0	DIED	4.Critical/Fatal	5	1	1	1	NO	typical symptoms COVID-19	censored	1	0	1	1	0	0	0	0	0	0	0	0	0	0	6		2020-03-11	1	1	1
429	0	Center_02	218	1	2020-03-02	0	14	1	blank	M	1	83	7	7	8	1	0	1	0	0	blank	3.Severe	3	0	0	1	NO	typical symptoms COVID-19	0	0	0	0	0	0	0	0	0	0	0	0	0	0	0	NA	2020-03-16	0	0	0	0
430	0	Center_02	219	1	2020-03-03	0	5	1	blank	M	1	64	6	6	6	1	0	1	0	0	blank	2.Moderate	2	0	0	0	NO	typical symptoms COVID-19	censored	1	0	0	1	0	0	0	0	0	1	1	0	1	0	NA	2020-03-08	0	0	0	0
431	0	Center_02	220	1	2020-03-03	0	14	1	blank	M	1	68	3	3	4	1	0	1	0	0	DIED	4.Critical/Fatal	5	1	1	1	NO	severe symptoms COVID-19	censored	1	1	1	1	0	0	0	0	0	1	0	0	0	0	NA		2020-03-17	1	1	1
432	0	Center_02	221	1	2020-03-03	0	9	1	blank	M	1	76	7	7	8	1	0	1	0	0	blank	3.Severe	3	0	0	1	NO	typical symptoms COVID-19	censored	1	0	0	0	0	0	0	0	0	0	0	0	1	0	7	2020-03-12	0	0	0	0
433	0	Center_02	222	1	2020-03-03	0		1	blank	M	1	83	3	3	4	1	0	1	0	0	blank	3.Severe	3	0	0	1	NO	typical symptoms COVID-19	censored	1	1	0	0	0	0	0	0	0	0	0	0	0	0	NA	2020-04-27	0	0	0	0
434	0	Center_02	223	1	2020-03-03	0	7	1	blank	M	1	86	7	7	8	1	0	1	0	0	blank	4.Critical/Fatal	5	1	1	1	NO	typical symptoms COVID-19	0	0	0	0	0	0	0	0	0	0	0	0	0	0	0	NA		2020-03-10	1	1	1
435	0	Center_02	224	1	2020-03-03	0	6	1	blank	M	1	77	7	7	8	1	0	1	0	0	DIED	4.Critical/Fatal	5	1	1	1	NO	typical symptoms COVID-19	censored	1	0	0	0	0	0	0	0	1	0	0	0	0	0	7		2020-03-09	1	1	1
436	0	Center_02	225	1	2020-03-03	0		1	blank	M	1	58	7	7	8	1	0	0	1	1	blank	4.Critical/Fatal	4	1	1	1	NO	typical symptoms COVID-19	censored	1	0	0	0	0	0	0	0	0	0	0	0	1	0	NA	2020-04-27	0	0	1	1
437	0	Center_02	226	1	2020-02-25	0	0	1	blank	F	0	67	7	7	8	1	1	0	0	1	blank	1.Mild	1	0	0	0	NO	Mild symptoms COVID-19		0	0	0	0	0	0	0	0	0	0	0	0	0	0	NA	2020-02-25	0	0	0	0
438	0	Center_02	227	1	2020-03-03	0	9	1	blank	F	0	74	10	10	10	0	0	1	0	0	blank	3.Severe	3	0	0	1	NO	typical symptoms COVID-19	censored	1	0	1	0	0	0	0	0	0	1	0	0	0	0	10	2020-03-12	0	0	0	0
439	0	Center_02	228	1	2020-03-03	0	4	1	blank	F	0	35	10	10	10	0	0	1	0	0	blank	2.Moderate	2	0	0	0	NO	NA	censored	1	0	0	0	0	0	0	0	0	0	0	1	0	0	NA	2020-03-07	0	0	0	0
440	0	Center_02	229	1	2020-03-03	0	0	1	blank	M	1	48	2	2	2	1	1	0	0	1	blank	1.Mild	1	0	0	0	NO	Mild symptoms COVID-19		0	0	0	0	0	0	0	0	0	0	0	0	0	0	NA	2020-03-03	0	0	0	0
441	0	Center_02	230	1	2020-03-03	0	0	1	blank	M	1	44	3	3	4	1	1	0	0	1	blank	1.Mild	1	0	0	0	NO	Mild symptoms COVID-19		0	0	0	0	0	0	0	0	0	0	0	0	0	0	X	2020-03-03	0	0	0	0
442	0	Center_02	231	1	2020-03-03	0	4	1	blank	M	1	83	6	6	6	1	0	1	0	0	blank	4.Critical/Fatal	5	1	1	1	NO	typical symptoms COVID-19	censored	1	0	0	0	0	0	0	1	0	0	0	0	0	0	6		2020-03-07	1	1	1
443	0	Center_02	232	1	2020-03-03	0	10	1	blank	M	1	66	10	10	10	0	0	1	0	0	blank	3.Severe	3	0	0	1	NO	typical symptoms COVID-19	censored	1	1	0	0	0	0	0	0	0	0	0	0	0	0	10	2020-03-13	0	0	0	0
444	0	Center_02	233	1	2020-03-04	0		1	blank	M	1	53	7	7	8	1	0	1	0	0	blank	3.Severe	3	0	0	1	NO	typical symptoms COVID-19	0	0	0	0	0	0	0	0	0	0	0	0	0	0	0	7	2020-03-12	0	0	0	0
445	0	Center_02	234	1	2020-03-04	0	8	1	blank	M	1	76	7	7	8	1	0	1	0	0	blank	3.Severe	3	0	0	1	NO	typical symptoms COVID-19	censored	1	0	1	0	0	0	0	0	0	0	0	0	0	0	7	2020-03-12	0	0	0	0
446	0	Center_02	235	1	2020-03-04	0	9	1	blank	F	0	76	10	10	10	0	0	1	0	0	blank	3.Severe	3	0	0	1	NO	Mild symptoms COVID-19	censored	1	0	1	0	0	0	0	0	0	0	0	0	0	0	10	2020-03-13	0	0	0	0
447	0	Center_02	236	1	2020-03-04	0	0	1	blank	M	1	57	2	2	2	1	1	0	0	1	blank	1.Mild	1	0	0	0	NO	Mild symptoms COVID-19		0	0	0	0	0	0	0	0	0	0	0	0	0	0	NA	2020-03-04	0	0	0	0
448	0	Center_03	237	1	2020-03-19	1	5	1	2020-03-20	F	0	79	2	2	2	1	0	0	1	1	Nee ICU	4.Critical/Fatal	5	1	1	1	blank	blank	censored	1	1	0	0	0	1	0	0	0	0	0	0	0	0	blank	0	2020-03-24	1	1	1
449	0	Center_03	237	0	2020-03-19	1	5	1	2020-03-20	F	0	79								1		4.Critical/Fatal	5	1	1	1	blank	blank	censored	1	1	0	0	0	1	0	0	0	0	0	0	0	0	blank	0	2020-03-24	1	1	1
450	0	Center_03	237	0	2020-03-19	1	5	1	2020-03-20	F	0	79	2	2	2	1	0	0	1	1	Nee ICU	4.Critical/Fatal	5	1	1	1	blank	blank	censored	1	1	0	0	0	1	0	0	0	0	0	0	0	0	blank	0	2020-03-24	1	1	1
451	0	Center_03	237	0	2020-03-19	2	5	1	2020-03-20	F	0	79	3	3	4	1	0	0	1	1	Nee ICU	4.Critical/Fatal	5	1	1	1	blank	blank	censored	1	1	0	0	0	1	0	0	0	0	0	0	0	0	blank	0	2020-03-24	1	1	1
452	0	Center_03	237	0	2020-03-19	3	5	1	2020-03-20	F	0	79	4	4	4	1	0	0	1	1	Nee ICU	4.Critical/Fatal	5	1	1	1	blank	blank	censored	1	1	0	0	0	1	0	0	0	0	0	0	0	0	blank	0	2020-03-24	1	1	1
453	0	Center_03	237	0	2020-03-19	4	5	1	2020-03-20	F	0	79	5	5	6	1	0	0	1	1	Nee ICU	4.Critical/Fatal	5	1	1	1	blank	blank	censored	1	1	0	0	0	1	0	0	0	0	0	0	0	0	blank	0	2020-03-24	1	1	1
454	0	Center_03	237	0	2020-03-19	5	5	1	2020-03-20	F	0	79	6	6	6	1	0	0	1	1	Nee ICU	4.Critical/Fatal	5	1	1	1	blank	blank	censored	1	1	0	0	0	1	0	0	0	0	0	0	0	0	blank	0	2020-03-24	1	1	1
455	0	Center_03	238	1	2020-03-06	11	25	0	2020-03-08	M	1	45	17	18	18	0	0	0	1	1	Ja ICU	4.Critical/Fatal	4	1	1	1	blank	blank	0	0	0	0	0	0	0	0	0	0	0	0	0	0	0	blank	2020-03-31	0	0	1	1
456	0	Center_03	238	0	2020-03-06	12	25	0	2020-03-08	M	1	45	18	18	18	0	0	0	1	1	Ja ICU	4.Critical/Fatal	4	1	1	1	blank	blank	0	0	0	0	0	0	0	0	0	0	0	0	0	0	0	blank	2020-03-31	0	0	1	1
457	0	Center_03	238	0	2020-03-06	13	25	0	2020-03-08	M	1	45	19	20	20	0	0	0	1	1	Ja ICU	4.Critical/Fatal	4	1	1	1	blank	blank	0	0	0	0	0	0	0	0	0	0	0	0	0	0	0	blank	2020-03-31	0	0	1	1
458	0	Center_03	238	0	2020-03-06	14	25	0	2020-03-08	M	1	45	20	20	20	0	0	0	1	1	Ja ICU	4.Critical/Fatal	4	1	1	1	blank	blank	0	0	0	0	0	0	0	0	0	0	0	0	0	0	0	blank	2020-03-31	0	0	1	1
459	0	Center_03	238	0	2020-03-06	15	25	0	2020-03-08	M	1	45	21	22	22	0	0	0	1	1	Ja ICU	4.Critical/Fatal	4	1	1	1	blank	blank	0	0	0	0	0	0	0	0	0	0	0	0	0	0	0	blank	2020-03-31	0	0	1	1
460	0	Center_03	238	0	2020-03-06	16	25	0	2020-03-08	M	1	45	22	22	22	0	0	0	1	1	Ja ICU	4.Critical/Fatal	4	1	1	1	blank	blank	0	0	0	0	0	0	0	0	0	0	0	0	0	0	0	blank	2020-03-31	0	0	1	1
461	0	Center_03	239	1	2020-03-13	0	3	1	2020-03-14	F	0	53	9	9	10	0	0	1	0	0	Nee ICU	2.Moderate	2	0	0	0	blank	blank	0	0	0	0	0	0	0	0	0	0	0	0	0	0	0	blank	2020-03-16	0	0	0	0
462	0	Center_03	240	1	2020-03-20	1	shift	1	2020-03-20	M	1	62	11	11	12	0	0	1	0	0	Nee ICU	3.Severe	3	0	0	1	blank	blank	0	0	0	0	0	0	0	0	0	0	0	0	0	0	0	blank	0	0	0	0	0
463	0	Center_03	240	0	2020-03-20	3	shift	1	2020-03-20	M	1	62	13	13	14	0	0	1	0	0	Nee ICU	3.Severe	3	0	0	1	blank	blank	0	0	0	0	0	0	0	0	0	0	0	0	0	0	0	blank	0	0	0	0	0
464	0	Center_03	240	0	2020-03-20	4	shift	1	2020-03-20	M	1	62	14	14	14	0	0	1	0	0	Nee ICU	3.Severe	3	0	0	1	blank	blank	0	0	0	0	0	0	0	0	0	0	0	0	0	0	0	blank	0	0	0	0	0
465	0	Center_03	241	1	2020-03-19	0	shift	1	2020-03-20	F	0	68	18	18	18	0	0	0	1	1	Ja ICU	4.Critical/Fatal	4	1	1	1	blank	blank	censored	1	0	0	0	1	0	0	0	0	0	1	0	0	0	blank	0	0	0	1	1
466	0	Center_03	241	0	2020-03-19	0	shift	1	2020-03-20	F	0	68	18	18	18	0	0	0	1	1	Ja ICU	4.Critical/Fatal	4	1	1	1	blank	blank	censored	1	0	0	0	1	0	0	0	0	0	1	0	0	0	blank	0	0	0	1	1
467	0	Center_03	241	0	2020-03-19	1	shift	1	2020-03-20	F	0	68	19	20	20	0	0	0	1	1	Ja ICU	4.Critical/Fatal	4	1	1	1	blank	blank	censored	1	0	0	0	1	0	0	0	0	0	1	0	0	0	blank	0	0	0	1	1
468	0	Center_03	241	0	2020-03-19	2	shift	1	2020-03-20	F	0	68	20	20	20	0	0	0	1	1	Ja ICU	4.Critical/Fatal	4	1	1	1	blank	blank	censored	1	0	0	0	1	0	0	0	0	0	1	0	0	0	blank	0	0	0	1	1
469	0	Center_03	241	0	2020-03-19	2	shift	1	2020-03-20	F	0	68	20	20	20	0	0	0	1	1	Ja ICU	4.Critical/Fatal	4	1	1	1	blank	blank	censored	1	0	0	0	1	0	0	0	0	0	1	0	0	0	blank	0	0	0	1	1
470	0	Center_03	241	0	2020-03-19	3	shift	1	2020-03-20	F	0	68	21	22	22	0	0	0	1	1	Ja ICU	4.Critical/Fatal	4	1	1	1	blank	blank	censored	1	0	0	0	1	0	0	0	0	0	1	0	0	0	blank	0	0	0	1	1
471	0	Center_03	241	0	2020-03-19	4	shift	1	2020-03-20	F	0	68	22	22	22	0	0	0	1	1	Ja ICU	4.Critical/Fatal	4	1	1	1	blank	blank	censored	1	0	0	0	1	0	0	0	0	0	1	0	0	0	blank	0	0	0	1	1
472	0	Center_03	241	0	2020-03-19	5	shift	1	2020-03-20	F	0	68	23	24	24	0	0	0	1	1	Ja ICU	4.Critical/Fatal	4	1	1	1	blank	blank	censored	1	0	0	0	1	0	0	0	0	0	1	0	0	0	blank	0	0	0	1	1
473	0	Center_03	241	0	2020-03-19	5	shift	1	2020-03-20	F	0	68	23	24	24	0	0	0	1	1	Ja ICU	4.Critical/Fatal	4	1	1	1	blank	blank	censored	1	0	0	0	1	0	0	0	0	0	1	0	0	0	blank	0	0	0	1	1
474	0	Center_03	241	0	2020-03-19	6	shift	1	2020-03-20	F	0	68	24	24	24	0	0	0	1	1	Ja ICU	4.Critical/Fatal	4	1	1	1	blank	blank	censored	1	0	0	0	1	0	0	0	0	0	1	0	0	0	blank	0	0	0	1	1
475	0	Center_03	242	1	2020-03-19	0	shift	1	2020-03-20	M	1	75	7	7	8	1	0	0	1	1	Ja ICU	4.Critical/Fatal	4	1	1	1	blank	blank	censored	1	0	0	0	1	0	0	0	0	0	0	0	0	0	blank	0	0	0	1	1
476	0	Center_03	242	0	2020-03-19	1	shift	1	2020-03-20	M	1	75	8	8	8	0	0	0	1	1	Ja ICU	4.Critical/Fatal	4	1	1	1	blank	blank	censored	1	0	0	0	1	0	0	0	0	0	0	0	0	0	blank	0	0	0	1	1
477	0	Center_03	242	0	2020-03-19	1	shift	1	2020-03-20	M	1	75	8	8	8	0	0	0	1	1	Ja ICU	4.Critical/Fatal	4	1	1	1	blank	blank	censored	1	0	0	0	1	0	0	0	0	0	0	0	0	0	blank	0	0	0	1	1
478	0	Center_03	242	0	2020-03-19	1	shift	1	2020-03-20	M	1	75	8	8	8	0	0	0	1	1	Ja ICU	4.Critical/Fatal	4	1	1	1	blank	blank	censored	1	0	0	0	1	0	0	0	0	0	0	0	0	0	blank	0	0	0	1	1
479	0	Center_03	242	0	2020-03-19	2	shift	1	2020-03-20	M	1	75	9	9	10	0	0	0	1	1	Ja ICU	4.Critical/Fatal	4	1	1	1	blank	blank	censored	1	0	0	0	1	0	0	0	0	0	0	0	0	0	blank	0	0	0	1	1
480	0	Center_03	242	0	2020-03-19	2	shift	1	2020-03-20	M	1	75	9	9	10	0	0	0	1	1	Ja ICU	4.Critical/Fatal	4	1	1	1	blank	blank	censored	1	0	0	0	1	0	0	0	0	0	0	0	0	0	blank	0	0	0	1	1
481	0	Center_03	243	1	2020-03-09	8	shift	0	2020-03-10	M	1	61	15	16	16	0	0	1	0	1	Ja ICU	4.Critical/Fatal	4	1	1	1	blank	blank	0	0	0	0	0	0	0	0	0	0	0	0	0	0	0	blank	0	0	0	1	1
482	0	Center_03	243	0	2020-03-09	9	shift	0	2020-03-10	M	1	61	16	16	16	0	0	0	1	1	Ja ICU	4.Critical/Fatal	4	1	1	1	blank	blank	0	0	0	0	0	0	0	0	0	0	0	0	0	0	0	blank	0	0	0	1	1
483	0	Center_03	243	0	2020-03-09	9	shift	0	2020-03-10	M	1	61	16	16	16	0	0	0	1	1	Ja ICU	4.Critical/Fatal	4	1	1	1	blank	blank	0	0	0	0	0	0	0	0	0	0	0	0	0	0	0	blank	0	0	0	1	1
484	0	Center_03	243	0	2020-03-09	10	shift	0	2020-03-10	M	1	61	17	18	18	0	0	0	1	1	Ja ICU	4.Critical/Fatal	4	1	1	1	blank	blank	0	0	0	0	0	0	0	0	0	0	0	0	0	0	0	blank	0	0	0	1	1
485	0	Center_03	243	0	2020-03-09	11	shift	0	2020-03-10	M	1	61	18	18	18	0	0	0	1	1	Ja ICU	4.Critical/Fatal	4	1	1	1	blank	blank	0	0	0	0	0	0	0	0	0	0	0	0	0	0	0	blank	0	0	0	1	1
486	0	Center_03	244	1	2020-03-16	2	7	1	2020-03-19	M	1	60	14	14	14	0	0	1	0	0	Nee ICU	3.Severe	3	0	0	1	blank	blank	0	0	0	0	0	0	0	0	0	0	0	0	0	0	0	blank	2020-03-23	0	0	0	0
487	0	Center_03	244	0	2020-03-16	6	7	1	2020-03-19	M	1	60	18	18	18	0	0	1	0	0	Nee ICU	3.Severe	3	0	0	1	blank	blank	0	0	0	0	0	0	0	0	0	0	0	0	0	0	0	blank	2020-03-23	0	0	0	0
488	0	Center_03	245	1	2020-03-18	2	shift	1	2020-03-20	M	1	58	16	16	16	0	0	0	1	1	Ja ICU	4.Critical/Fatal	4	1	1	1	blank	blank	0	0	0	0	0	0	0	0	0	0	0	0	0	0	0	blank	0	0	0	1	1
489	0	Center_03	246	1	2020-03-21	0	4	1	2020-03-20	M	1	67	11	11	12	0	0	1	0	0	Nee ICU	2.Moderate	2	0	0	0	blank	blank	0	0	0	0	0	0	0	0	0	0	0	0	0	0	0	blank	2020-03-25	0	0	0	0
490	0	Center_03	246	0	2020-03-21	2	4	1	2020-03-20	M	1	67	13	13	14	0	0	1	0	0	Nee ICU	2.Moderate	2	0	0	0	blank	blank	0	0	0	0	0	0	0	0	0	0	0	0	0	0	0	blank	2020-03-25	0	0	0	0
491	0	Center_03	247	1	2020-03-19	2	7	1	2020-03-20	M	1	76	12	12	12	0	0	1	0	0	Nee ICU	3.Severe	3	0	0	1	blank	blank	0	0	0	0	0	0	0	0	0	0	0	0	0	0	0	blank	2020-03-26	0	0	0	0
492	0	Center_03	247	0	2020-03-19	4	7	1	2020-03-20	M	1	76	14	14	14	0	0	1	0	0	Nee ICU	3.Severe	3	0	0	1	blank	blank	0	0	0	0	0	0	0	0	0	0	0	0	0	0	0	blank	2020-03-26	0	0	0	0
493	0	Center_03	247	0	2020-03-19	5	7	1	2020-03-20	M	1	76	15	16	16	0	0	1	0	0	Nee ICU	3.Severe	3	0	0	1	blank	blank	0	0	0	0	0	0	0	0	0	0	0	0	0	0	0	blank	2020-03-26	0	0	0	0
494	0	Center_03	247	0	2020-03-19	6	7	1	2020-03-20	M	1	76	16	16	16	0	0	1	0	0	Nee ICU	3.Severe	3	0	0	1	blank	blank	0	0	0	0	0	0	0	0	0	0	0	0	0	0	0	blank	2020-03-26	0	0	0	0
495	0	Center_03	248	1	2020-03-17	1	10	1	2020-03-16	M	1	53	8	8	8	0	0	1	0	0	Nee ICU	3.Severe	3	0	0	1	blank	blank	0	0	0	0	0	0	0	0	0	0	0	0	0	0	0	blank	2020-03-27	0	0	0	0
496	0	Center_03	248	0	2020-03-17	2	10	1	2020-03-16	M	1	53	9	9	10	0	0	1	0	0	Nee ICU	3.Severe	3	0	0	1	blank	blank	0	0	0	0	0	0	0	0	0	0	0	0	0	0	0	blank	2020-03-27	0	0	0	0
497	0	Center_03	248	0	2020-03-17	3	10	1	2020-03-16	M	1	53	10	10	10	0	0	1	0	0	Nee ICU	3.Severe	3	0	0	1	blank	blank	0	0	0	0	0	0	0	0	0	0	0	0	0	0	0	blank	2020-03-27	0	0	0	0
498	0	Center_03	248	0	2020-03-17	4	10	1	2020-03-16	M	1	53	11	11	12	0	0	1	0	0	Nee ICU	3.Severe	3	0	0	1	blank	blank	0	0	0	0	0	0	0	0	0	0	0	0	0	0	0	blank	2020-03-27	0	0	0	0
499	0	Center_03	249	1	2020-03-15	2	31	1	2020-03-16	M	1	56	9	9	10	0	0	0	1	1	Ja ICU	4.Critical/Fatal	4	1	1	1	blank	blank	censored	1	0	0	1	0	0	0	0	0	0	0	0	0	0	blank	2020-04-17	0	0	1	1
500	0	Center_03	249	0	2020-03-15	3	31	1	2020-03-16	M	1	56	10	10	10	0	0	0	1	1	Ja ICU	4.Critical/Fatal	4	1	1	1	blank	blank	censored	1	0	0	1	0	0	0	0	0	0	0	0	0	0	blank	2020-04-17	0	0	1	1
501	0	Center_03	249	0	2020-03-15	3	31	1	2020-03-16	M	1	56	10	10	10	0	0	0	1	1	Ja ICU	4.Critical/Fatal	4	1	1	1	blank	blank	censored	1	0	0	1	0	0	0	0	0	0	0	0	0	0	blank	2020-04-17	0	0	1	1
502	0	Center_03	249	0	2020-03-15	4	31	1	2020-03-16	M	1	56	11	11	12	0	0	0	1	1	Ja ICU	4.Critical/Fatal	4	1	1	1	blank	blank	censored	1	0	0	1	0	0	0	0	0	0	0	0	0	0	blank	2020-04-17	0	0	1	1
503	0	Center_03	249	0	2020-03-15	4	31	1	2020-03-16	M	1	56	11	11	12	0	0	0	1	1	Ja ICU	4.Critical/Fatal	4	1	1	1	blank	blank	censored	1	0	0	1	0	0	0	0	0	0	0	0	0	0	blank	2020-04-17	0	0	1	1
504	0	Center_03	249	0	2020-03-15	4	31	1	2020-03-16	M	1	56	11	11	12	0	0	0	1	1	Ja ICU	4.Critical/Fatal	4	1	1	1	blank	blank	censored	1	0	0	1	0	0	0	0	0	0	0	0	0	0	blank	2020-04-17	0	0	1	1
505	0	Center_03	249	0	2020-03-15	5	31	1	2020-03-16	M	1	56	12	12	12	0	0	0	1	1	Ja ICU	4.Critical/Fatal	4	1	1	1	blank	blank	censored	1	0	0	1	0	0	0	0	0	0	0	0	0	0	blank	2020-04-17	0	0	1	1
506	0	Center_03	249	0	2020-03-15	6	31	1	2020-03-16	M	1	56	13	13	14	0	0	0	1	1	Ja ICU	4.Critical/Fatal	4	1	1	1	blank	blank	censored	1	0	0	1	0	0	0	0	0	0	0	0	0	0	blank	2020-04-17	0	0	1	1
507	0	Center_03	249	0	2020-03-15	7	31	1	2020-03-16	M	1	56	14	14	14	0	0	0	1	1	Ja ICU	4.Critical/Fatal	4	1	1	1	blank	blank	censored	1	0	0	1	0	0	0	0	0	0	0	0	0	0	blank	2020-04-17	0	0	1	1
508	0	Center_03	250	1	2020-03-19	2	shift	1	2020-03-20	F	0	71	9	9	10	0	0	1	0	0	Nee ICU	3.Severe	3	0	0	1	blank	blank	censored	1	0	0	0	0	1	0	0	0	0	0	0	0	0	blank	0	0	0	0	0
509	0	Center_03	250	0	2020-03-19	5	shift	1	2020-03-20	F	0	71	12	12	12	0	0	1	0	0	Nee ICU	3.Severe	3	0	0	1	blank	blank	censored	1	0	0	0	0	1	0	0	0	0	0	0	0	0	blank	0	0	0	0	0
510	0	Center_03	250	0	2020-03-19	6	shift	1	2020-03-20	F	0	71	13	13	14	0	0	1	0	0	Nee ICU	3.Severe	3	0	0	1	blank	blank	censored	1	0	0	0	0	1	0	0	0	0	0	0	0	0	blank	0	0	0	0	0
511	0	Center_03	251	1	2020-03-18	2	5	1	2020-03-19	M	1	66	9	9	10	0	0	1	0	0	Nee ICU	2.Moderate	2	0	0	0	blank	blank	censored	1	0	1	0	0	0	0	0	0	0	0	0	1	0	blank	2020-03-23	0	0	0	0
512	0	Center_03	251	0	2020-03-18	3	5	1	2020-03-19	M	1	66	10	10	10	0	0	1	0	0	Nee ICU	2.Moderate	2	0	0	0	blank	blank	censored	1	0	1	0	0	0	0	0	0	0	0	0	1	0	blank	2020-03-23	0	0	0	0
513	0	Center_03	251	0	2020-03-18	5	5	1	2020-03-19	M	1	66	12	12	12	0	0	1	0	0	Nee ICU	2.Moderate	2	0	0	0	blank	blank	censored	1	0	1	0	0	0	0	0	0	0	0	0	1	0	blank	2020-03-23	0	0	0	0
514	0	Center_03	252	1	2020-03-10	7	14	1	2020-03-10	M	1	48	18	18	18	0	0	0	1	1	Ja ICU	4.Critical/Fatal	5	1	1	1	blank	blank	#N/A	0	0	0	0	0	0	0	0	0	0	0	0	0	0	blank	0	2020-03-24	1	1	1
515	0	Center_03	252	0	2020-03-10	8	14	0	2020-03-10	M	1	48	19	20	20	0	0	0	1	1	Ja ICU	4.Critical/Fatal	5	1	1	1	blank	blank	#N/A	0	0	0	0	0	0	0	0	0	0	0	0	0	0	blank	0	2020-03-24	1	1	1
516	0	Center_03	252	0	2020-03-10	9	14	0	2020-03-10	M	1	48	20	20	20	0	0	0	1	1	Ja ICU	4.Critical/Fatal	5	1	1	1	blank	blank	#N/A	0	0	0	0	0	0	0	0	0	0	0	0	0	0	blank	0	2020-03-24	1	1	1
517	0	Center_03	252	0	2020-03-10	10	14	0	2020-03-10	M	1	48	21	22	22	0	0	0	1	1	Ja ICU	4.Critical/Fatal	5	1	1	1	blank	blank	#N/A	0	0	0	0	0	0	0	0	0	0	0	0	0	0	blank	0	2020-03-24	1	1	1
518	0	Center_03	252	0	2020-03-10	11	14	0	2020-03-10	M	1	48	22	22	22	0	0	0	1	1	Ja ICU	4.Critical/Fatal	5	1	1	1	blank	blank	#N/A	0	0	0	0	0	0	0	0	0	0	0	0	0	0	blank	0	2020-03-24	1	1	1
519	0	Center_03	252	0	2020-03-10	12	14	0	2020-03-10	M	1	48	23	24	24	0	0	0	1	1	Ja ICU	4.Critical/Fatal	5	1	1	1	blank	blank	#N/A	0	0	0	0	0	0	0	0	0	0	0	0	0	0	blank	0	2020-03-24	1	1	1
520	0	Center_03	253	1	2020-03-11	6	20	1	2020-03-11	M	1	71	7	7	8	1	0	0	1	1	Ja ICU	4.Critical/Fatal	5	1	1	1	blank	blank	0	0	0	0	0	0	0	0	0	0	0	0	0	0	0	blank	0	2020-03-31	1	1	1
521	0	Center_03	253	0	2020-03-11	7	20	1	2020-03-11	M	1	71	8	8	8	0	0	0	1	1	Ja ICU	4.Critical/Fatal	5	1	1	1	blank	blank	0	0	0	0	0	0	0	0	0	0	0	0	0	0	0	blank	0	2020-03-31	1	1	1
522	0	Center_03	253	0	2020-03-11	7	20	1	2020-03-11	M	1	71	8	8	8	0	0	0	1	1	Ja ICU	4.Critical/Fatal	5	1	1	1	blank	blank	0	0	0	0	0	0	0	0	0	0	0	0	0	0	0	blank	0	2020-03-31	1	1	1
523	0	Center_03	253	0	2020-03-11	7	20	1	2020-03-11	M	1	71	8	8	8	0	0	0	1	1	Ja ICU	4.Critical/Fatal	5	1	1	1	blank	blank	0	0	0	0	0	0	0	0	0	0	0	0	0	0	0	blank	0	2020-03-31	1	1	1
524	0	Center_03	253	0	2020-03-11	7	20	1	2020-03-11	M	1	71	8	8	8	0	0	0	1	1	Ja ICU	4.Critical/Fatal	5	1	1	1	blank	blank	0	0	0	0	0	0	0	0	0	0	0	0	0	0	0	blank	0	2020-03-31	1	1	1
525	0	Center_03	253	0	2020-03-11	8	20	0	2020-03-11	M	1	71	10	10	10	0	0	0	1	1	Ja ICU	4.Critical/Fatal	5	1	1	1	blank	blank	0	0	0	0	0	0	0	0	0	0	0	0	0	0	0	blank	0	2020-03-31	1	1	1
526	0	Center_03	253	0	2020-03-11	9	20	0	2020-03-11	M	1	71	11	11	12	0	0	0	1	1	Ja ICU	4.Critical/Fatal	5	1	1	1	blank	blank	0	0	0	0	0	0	0	0	0	0	0	0	0	0	0	blank	0	2020-03-31	1	1	1
527	0	Center_03	254	1	2020-03-10	6	6	1	2020-03-11	F	0	73	9	9	10	0	0	0	1	1	Ja ICU	4.Critical/Fatal	5	1	1	1	blank	blank	censored	1	0	0	0	1	1	0	0	0	0	0	0	0	0	blank	0	2020-03-16	1	1	1
528	0	Center_03	255	1	2020-03-11	6	16	1	2020-03-11	F	0	67	15	16	16	0	0	1	0	0	Ja ICU	3.Severe	3	0	0	1	blank	blank	0	0	0	0	0	0	0	0	0	0	0	0	0	0	0	blank	2020-03-27	0	0	0	0
529	0	Center_03	255	0	2020-03-11	7	16	1	2020-03-11	F	0	67	16	16	16	0	0	1	0	0	Ja ICU	3.Severe	3	0	0	1	blank	blank	0	0	0	0	0	0	0	0	0	0	0	0	0	0	0	blank	2020-03-27	0	0	0	0
530	0	Center_03	255	0	2020-03-11	8	16	0	2020-03-11	F	0	67	17	18	18	0	0	1	0	0	Ja ICU	3.Severe	3	0	0	1	blank	blank	0	0	0	0	0	0	0	0	0	0	0	0	0	0	0	blank	2020-03-27	0	0	0	0
531	0	Center_03	255	0	2020-03-11	9	16	0	2020-03-11	F	0	67	18	18	18	0	0	1	0	0	Ja ICU	3.Severe	3	0	0	1	blank	blank	0	0	0	0	0	0	0	0	0	0	0	0	0	0	0	blank	2020-03-27	0	0	0	0
532	0	Center_03	255	0	2020-03-11	10	16	0	2020-03-11	F	0	67	19	20	20	0	0	1	0	0	Ja ICU	3.Severe	3	0	0	1	blank	blank	0	0	0	0	0	0	0	0	0	0	0	0	0	0	0	blank	2020-03-27	0	0	0	0
533	0	Center_03	256	1	2020-03-18	1	shift	1	2020-03-20	M	1	68	5	5	6	1	0	1	0	0	Ja ICU	3.Severe	3	0	0	1	blank	blank	censored	1	0	0	1	1	0	0	0	0	0	0	0	1	0	blank	0	0	0	0	0
534	0	Center_03	256	0	2020-03-18	2	shift	1	2020-03-20	M	1	68	6	6	6	1	0	1	0	0	Ja ICU	3.Severe	3	0	0	1	blank	blank	censored	1	0	0	1	1	0	0	0	0	0	0	0	1	0	blank	0	0	0	0	0
535	0	Center_03	257	1	2020-03-20	1	6	1	2020-03-20	F	0	78	6	6	6	1	0	1	0	0	Nee ICU	4.Critical/Fatal	5	1	1	1	blank	blank	censored	1	1	0	1	0	0	0	0	0	0	0	0	0	0	blank	0	2020-03-26	1	1	1
536	0	Center_03	257	0	2020-03-20	3	6	1	2020-03-20	F	0	78	8	8	8	0	0	1	0	0	Nee ICU	4.Critical/Fatal	5	1	1	1	blank	blank	censored	1	1	0	1	0	0	0	0	0	0	0	0	0	0	blank	0	2020-03-26	1	1	1
537	0	Center_03	257	0	2020-03-20	4	6	1	2020-03-20	F	0	78	9	9	10	0	0	1	0	0	Nee ICU	4.Critical/Fatal	5	1	1	1	blank	blank	censored	1	1	0	1	0	0	0	0	0	0	0	0	0	0	blank	0	2020-03-26	1	1	1
538	0	Center_03	257	0	2020-03-20	5	6	1	2020-03-20	F	0	78	10	10	10	0	0	1	0	0	Nee ICU	4.Critical/Fatal	5	1	1	1	blank	blank	censored	1	1	0	1	0	0	0	0	0	0	0	0	0	0	blank	0	2020-03-26	1	1	1
539	0	Center_03	258	1	2020-03-17	2	3	1	2020-03-18	M	1	52	5	5	6	1	0	1	0	0	Nee ICU	2.Moderate	2	0	0	0	blank	blank	0	0	0	0	0	0	0	0	0	0	0	0	0	0	0	blank	2020-03-20	0	0	0	0
540	0	Center_03	258	0	2020-03-17	3	3	1	2020-03-18	M	1	52	6	6	6	1	0	1	0	0	Nee ICU	2.Moderate	2	0	0	0	blank	blank	0	0	0	0	0	0	0	0	0	0	0	0	0	0	0	blank	2020-03-20	0	0	0	0
541	0	Center_03	259	1	2020-03-12	7	15	1	2020-03-10	M	1	74	13	13	14	0	0	1	0	0	Nee ICU	3.Severe	3	0	0	1	blank	blank	censored	1	0	1	1	1	0	0	0	0	0	0	0	0	0	blank	2020-03-27	0	0	0	0
542	0	Center_03	259	0	2020-03-12	8	15	0	2020-03-10	M	1	74	14	14	14	0	0	1	0	0	Nee ICU	3.Severe	3	0	0	1	blank	blank	censored	1	0	1	1	1	0	0	0	0	0	0	0	0	0	blank	2020-03-27	0	0	0	0
543	0	Center_03	260	1	2020-03-18	0	9	1	2020-03-19	F	0	79	3	3	4	1	0	1	0	0	Nee ICU	4.Critical/Fatal	5	1	1	1	blank	blank	censored	1	0	0	1	0	0	1	0	0	0	0	0	0	0	blank	0	2020-03-27	1	1	1
544	0	Center_03	260	0	2020-03-18	2	9	1	2020-03-19	F	0	79	5	5	6	1	0	1	0	0	Nee ICU	4.Critical/Fatal	5	1	1	1	blank	blank	censored	1	0	0	1	0	0	1	0	0	0	0	0	0	0	blank	0	2020-03-27	1	1	1
545	0	Center_03	260	0	2020-03-18	4	9	1	2020-03-19	F	0	79	7	7	8	1	0	1	0	0	Nee ICU	4.Critical/Fatal	5	1	1	1	blank	blank	censored	1	0	0	1	0	0	1	0	0	0	0	0	0	0	blank	0	2020-03-27	1	1	1
546	0	Center_03	260	0	2020-03-18	5	9	1	2020-03-19	F	0	79	8	8	8	0	0	1	0	0	Nee ICU	4.Critical/Fatal	5	1	1	1	blank	blank	censored	1	0	0	1	0	0	1	0	0	0	0	0	0	0	blank	0	2020-03-27	1	1	1
547	0	Center_03	260	0	2020-03-18	6	9	1	2020-03-19	F	0	79	9	9	10	0	0	1	0	0	Nee ICU	4.Critical/Fatal	5	1	1	1	blank	blank	censored	1	0	0	1	0	0	1	0	0	0	0	0	0	0	blank	0	2020-03-27	1	1	1
548	0	Center_03	261	1	2020-03-10	6	27	1	2020-03-11	M	1	43	13	13	14	0	0	0	1	1	Ja ICU	4.Critical/Fatal	4	1	1	1	blank	blank	0	0	0	0	0	0	0	0	0	0	0	0	0	0	0	blank	2020-04-06	0	0	1	1
549	0	Center_03	261	0	2020-03-10	7	27	1	2020-03-11	M	1	43	14	14	14	0	0	0	1	1	Ja ICU	4.Critical/Fatal	4	1	1	1	blank	blank	0	0	0	0	0	0	0	0	0	0	0	0	0	0	0	blank	2020-04-06	0	0	1	1
550	0	Center_03	261	0	2020-03-10	8	27	0	2020-03-11	M	1	43	15	16	16	0	0	0	1	1	Ja ICU	4.Critical/Fatal	4	1	1	1	blank	blank	0	0	0	0	0	0	0	0	0	0	0	0	0	0	0	blank	2020-04-06	0	0	1	1
551	0	Center_03	261	0	2020-03-10	9	27	0	2020-03-11	M	1	43	16	16	16	0	0	0	1	1	Ja ICU	4.Critical/Fatal	4	1	1	1	blank	blank	0	0	0	0	0	0	0	0	0	0	0	0	0	0	0	blank	2020-04-06	0	0	1	1
552	0	Center_03	261	0	2020-03-10	11	27	0	2020-03-11	M	1	43	18	18	18	0	0	0	1	1	Ja ICU	4.Critical/Fatal	4	1	1	1	blank	blank	0	0	0	0	0	0	0	0	0	0	0	0	0	0	0	blank	2020-04-06	0	0	1	1
553	0	Center_03	261	0	2020-03-10	12	27	0	2020-03-11	M	1	43	19	20	20	0	0	0	1	1	Ja ICU	4.Critical/Fatal	4	1	1	1	blank	blank	0	0	0	0	0	0	0	0	0	0	0	0	0	0	0	blank	2020-04-06	0	0	1	1
554	0	Center_03	261	0	2020-03-10	12	27	0	2020-03-11	M	1	43	19	20	20	0	0	0	1	1	Ja ICU	4.Critical/Fatal	4	1	1	1	blank	blank	0	0	0	0	0	0	0	0	0	0	0	0	0	0	0	blank	2020-04-06	0	0	1	1
555	0	Center_03	262	1	2020-03-18	2	10	1	2020-03-16	M	1	74	5	5	6	1	0	1	0	0	Nee ICU	3.Severe	3	0	0	1	blank	blank	0	0	0	0	0	0	0	0	0	0	0	0	0	0	0	blank	2020-03-28	0	0	0	0
556	0	Center_03	262	0	2020-03-18	4	10	1	2020-03-16	M	1	74	7	7	8	1	0	1	0	0	Nee ICU	3.Severe	3	0	0	1	blank	blank	0	0	0	0	0	0	0	0	0	0	0	0	0	0	0	blank	2020-03-28	0	0	0	0
557	0	Center_03	262	0	2020-03-18	5	10	1	2020-03-16	M	1	74	8	8	8	0	0	1	0	0	Nee ICU	3.Severe	3	0	0	1	blank	blank	0	0	0	0	0	0	0	0	0	0	0	0	0	0	0	blank	2020-03-28	0	0	0	0
558	0	Center_03	262	0	2020-03-18	6	10	1	2020-03-16	M	1	74	9	9	10	0	0	1	0	0	Nee ICU	3.Severe	3	0	0	1	blank	blank	0	0	0	0	0	0	0	0	0	0	0	0	0	0	0	blank	2020-03-28	0	0	0	0
559	0	Center_03	262	0	2020-03-18	7	10	1	2020-03-16	M	1	74	10	10	10	0	0	1	0	0	Nee ICU	3.Severe	3	0	0	1	blank	blank	0	0	0	0	0	0	0	0	0	0	0	0	0	0	0	blank	2020-03-28	0	0	0	0
560	0	Center_03	263	1	2020-03-13	7	12	1	2020-03-17	F	0	77	4	4	4	1	0	1	0	0	Nee ICU	3.Severe	3	0	0	1	blank	blank	0	0	0	0	0	0	0	0	0	0	0	0	0	0	0	blank	2020-03-25	0	0	0	0
561	0	Center_03	263	0	2020-03-13	11	12	0	2020-03-17	F	0	77	8	8	8	0	0	1	0	0	Nee ICU	3.Severe	3	0	0	1	blank	blank	0	0	0	0	0	0	0	0	0	0	0	0	0	0	0	blank	2020-03-25	0	0	0	0
562	0	Center_03	263	0	2020-03-13	12	12	0	2020-03-17	F	0	77	9	9	10	0	0	1	0	0	Nee ICU	3.Severe	3	0	0	1	blank	blank	0	0	0	0	0	0	0	0	0	0	0	0	0	0	0	blank	2020-03-25	0	0	0	0
563	0	Center_03	264	1	2020-03-17	3	shift	1	2020-03-16	F	0	69	8	8	8	0	0	1	0	0	Nee ICU	3.Severe	3	0	0	1	blank	blank	censored	1	0	0	0	0	0	0	0	0	0	0	0	0	0	blank	0	0	0	0	0
564	0	Center_03	264	0	2020-03-17	4	shift	1	2020-03-16	F	0	69	9	9	10	0	0	1	0	0	Nee ICU	3.Severe	3	0	0	1	blank	blank	censored	1	0	0	0	0	0	0	0	0	0	0	0	0	0	blank	0	0	0	0	0
565	0	Center_03	264	0	2020-03-17	5	shift	1	2020-03-16	F	0	69	10	10	10	0	0	1	0	0	Nee ICU	3.Severe	3	0	0	1	blank	blank	censored	1	0	0	0	0	0	0	0	0	0	0	0	0	0	blank	0	0	0	0	0
566	0	Center_03	264	0	2020-03-17	7	shift	1	2020-03-16	F	0	69	12	12	12	0	0	1	0	0	Nee ICU	3.Severe	3	0	0	1	blank	blank	censored	1	0	0	0	0	0	0	0	0	0	0	0	0	0	blank	0	0	0	0	0
567	0	Center_03	265	1	2020-03-18	0	shift	1	2020-03-19	M	1	55	5	5	6	1	0	0	1	1	Ja ICU	4.Critical/Fatal	4	1	1	1	blank	blank	0	0	0	0	0	0	0	0	0	0	0	0	0	0	0	blank	0	0	0	1	1
568	0	Center_03	265	0	2020-03-18	1	shift	1	2020-03-19	M	1	55	6	6	6	1	0	0	1	1	Ja ICU	4.Critical/Fatal	4	1	1	1	blank	blank	0	0	0	0	0	0	0	0	0	0	0	0	0	0	0	blank	0	0	0	1	1
569	0	Center_03	265	0	2020-03-18	2	shift	1	2020-03-19	M	1	55	7	7	8	1	0	0	1	1	Ja ICU	4.Critical/Fatal	4	1	1	1	blank	blank	0	0	0	0	0	0	0	0	0	0	0	0	0	0	0	blank	0	0	0	1	1
570	0	Center_03	266	1	2020-03-13	0	shift	1	2020-03-20	M	1	57	7	7	8	1	0	0	1	1	Ja ICU	4.Critical/Fatal	4	1	1	1	blank	blank	censored	1	0	0	0	0	1	0	0	0	0	0	0	0	0	blank	0	0	0	1	1
571	0	Center_03	266	0	2020-03-13	4	shift	1	2020-03-20	M	1	57	11	11	12	0	0	1	0	1	Ja ICU	4.Critical/Fatal	4	1	1	1	blank	blank	censored	1	0	0	0	0	1	0	0	0	0	0	0	0	0	blank	0	0	0	1	1
572	0	Center_03	266	0	2020-03-13	5	shift	1	2020-03-20	M	1	57	12	12	12	0	0	0	1	1	Ja ICU	4.Critical/Fatal	4	1	1	1	blank	blank	censored	1	0	0	0	0	1	0	0	0	0	0	0	0	0	blank	0	0	0	1	1
573	0	Center_03	266	0	2020-03-13	6	shift	1	2020-03-20	M	1	57	13	13	14	0	0	0	1	1	Ja ICU	4.Critical/Fatal	4	1	1	1	blank	blank	censored	1	0	0	0	0	1	0	0	0	0	0	0	0	0	blank	0	0	0	1	1
574	0	Center_03	266	0	2020-03-13	7	shift	1	2020-03-20	M	1	57	14	14	14	0	0	0	1	1	Ja ICU	4.Critical/Fatal	4	1	1	1	blank	blank	censored	1	0	0	0	0	1	0	0	0	0	0	0	0	0	blank	0	0	0	1	1
575	0	Center_03	267	1	2020-03-19	0	2	1	2020-03-20	M	1	66	14	14	14	0	0	1	0	0	Nee ICU	2.Moderate	2	0	0	0	blank	blank	censored	1	0	0	1	0	0	0	0	0	0	0	0	0	0	blank	2020-03-21	0	0	0	0
576	0	Center_03	267	0	2020-03-19	2	2	1	2020-03-20	M	1	66	16	16	16	0	0	1	0	0	Nee ICU	2.Moderate	2	0	0	0	blank	blank	censored	1	0	0	1	0	0	0	0	0	0	0	0	0	0	blank	2020-03-21	0	0	0	0
577	0	Center_03	268	1	2020-03-16	2	shift	1	2020-03-19	F	0	54	9	9	10	0	0	0	1	1	Ja ICU	4.Critical/Fatal	4	1	1	1	blank	blank	0	0	0	0	0	0	0	0	0	0	0	0	0	0	0	blank	0	0	0	1	1
578	0	Center_03	268	0	2020-03-16	2	shift	1	2020-03-19	F	0	54	9	9	10	0	0	0	1	1	Ja ICU	4.Critical/Fatal	4	1	1	1	blank	blank	0	0	0	0	0	0	0	0	0	0	0	0	0	0	0	blank	0	0	0	1	1
579	0	Center_03	268	0	2020-03-16	3	shift	1	2020-03-19	F	0	54	10	10	10	0	0	0	1	1	Ja ICU	4.Critical/Fatal	4	1	1	1	blank	blank	0	0	0	0	0	0	0	0	0	0	0	0	0	0	0	blank	0	0	0	1	1
580	0	Center_03	268	0	2020-03-16	3	shift	1	2020-03-19	F	0	54	10	10	10	0	0	0	1	1	Ja ICU	4.Critical/Fatal	4	1	1	1	blank	blank	0	0	0	0	0	0	0	0	0	0	0	0	0	0	0	blank	0	0	0	1	1
581	0	Center_03	269	1	2020-03-16	4	7	1	2020-03-16	M	1	51	10	10	10	0	0	1	0	0	Nee ICU	3.Severe	3	0	0	1	blank	blank	censored	1	0	0	0	0	0	0	0	0	0	0	0	1	0	blank	2020-03-23	0	0	0	0
582	0	Center_03	270	1	2020-03-14	3	6	1	2020-03-16	M	1	79	13	13	14	0	0	1	0	0	Ja ICU	4.Critical/Fatal	5	1	1	1	blank	blank	censored	1	0	0	0	1	0	1	0	0	0	0	0	0	0	blank	0	2020-03-20	1	1	1
583	0	Center_03	270	0	2020-03-14	4	6	1	2020-03-16	M	1	79	14	14	14	0	0	1	0	0	Ja ICU	4.Critical/Fatal	5	1	1	1	blank	blank	censored	1	0	0	0	1	0	1	0	0	0	0	0	0	0	blank	0	2020-03-20	1	1	1
584	0	Center_03	270	0	2020-03-14	5	6	1	2020-03-16	M	1	79	15	16	16	0	0	1	0	0	Ja ICU	4.Critical/Fatal	5	1	1	1	blank	blank	censored	1	0	0	0	1	0	1	0	0	0	0	0	0	0	blank	0	2020-03-20	1	1	1
585	0	Center_03	271	1	2020-03-08	7	9	1	2020-03-09	M	1	75	10	10	10	0	0	1	0	0	Ja ICU	4.Critical/Fatal	5	1	1	1	blank	blank	0	0	0	0	0	0	0	0	0	0	0	0	0	0	0	blank	0	2020-03-17	1	1	1
586	0	Center_03	271	0	2020-03-08	8	9	0	2020-03-09	M	1	75	11	11	12	0	0	1	0	0	Ja ICU	4.Critical/Fatal	5	1	1	1	blank	blank	0	0	0	0	0	0	0	0	0	0	0	0	0	0	0	blank	0	2020-03-17	1	1	1
587	0	Center_03	271	0	2020-03-08	9	9	0	2020-03-09	M	1	75	12	12	12	0	0	1	0	0	Ja ICU	4.Critical/Fatal	5	1	1	1	blank	blank	0	0	0	0	0	0	0	0	0	0	0	0	0	0	0	blank	0	2020-03-17	1	1	1
588	0	Center_03	271	0	2020-03-08	9	9	0	2020-03-09	M	1	75	12	12	12	0	0	1	0	0	Ja ICU	4.Critical/Fatal	5	1	1	1	blank	blank	0	0	0	0	0	0	0	0	0	0	0	0	0	0	0	blank	0	2020-03-17	1	1	1
589	0	Center_03	272	1	2020-03-19	0	8	1	2020-03-20	M	1	70					0	1	0	0	Nee ICU	3.Severe	3	0	0	1	blank	blank	censored	1	0	1	0	0	1	0	0	0	0	0	0	0	0	blank	2020-03-27	0	0	0	0
590	0	Center_03	272	0	2020-03-19	2	8	1	2020-03-20	M	1	70					0	1	0	0	Nee ICU	3.Severe	3	0	0	1	blank	blank	censored	1	0	1	0	0	1	0	0	0	0	0	0	0	0	blank	2020-03-27	0	0	0	0
591	0	Center_03	272	0	2020-03-19	5	8	1	2020-03-20	M	1	70					0	1	0	0	Nee ICU	3.Severe	3	0	0	1	blank	blank	censored	1	0	1	0	0	1	0	0	0	0	0	0	0	0	blank	2020-03-27	0	0	0	0
592	0	Center_03	273	1	2020-03-12	0	4	1	2020-03-13	M	1	83	14	14	14	0	0	1	0	0	Nee ICU	2.Moderate	2	0	0	0	blank	blank	censored	1	1	0	0	0	1	1	0	0	0	0	0	0	0	blank	2020-03-16	0	0	0	0
593	0	Center_03	274	1	2020-03-19	1	shift	1	2020-03-20	M	1	54	7	7	8	1	0	1	0	0	Ja ICU	3.Severe	3	0	0	1	blank	blank	0	0	0	0	0	0	0	0	0	0	0	0	0	0	0	blank	0	0	0	0	0
594	0	Center_03	274	0	2020-03-19	3	shift	1	2020-03-20	M	1	54	9	9	10	0	0	1	0	0	Ja ICU	3.Severe	3	0	0	1	blank	blank	0	0	0	0	0	0	0	0	0	0	0	0	0	0	0	blank	0	0	0	0	0
595	0	Center_03	274	0	2020-03-19	4	shift	1	2020-03-20	M	1	54	10	10	10	0	0	1	0	0	Ja ICU	3.Severe	3	0	0	1	blank	blank	0	0	0	0	0	0	0	0	0	0	0	0	0	0	0	blank	0	0	0	0	0
596	0	Center_03	275	1	2020-03-17	2	14	1	2020-03-18	M	1	86	7	7	8	1	0	1	0	0	Nee ICU	4.Critical/Fatal	5	1	1	1	blank	blank	censored	1	0	0	0	0	1	0	0	0	0	0	0	0	0	blank	0	2020-03-31	1	1	1
597	0	Center_03	275	0	2020-03-17	3	14	1	2020-03-18	M	1	86	8	8	8	0	0	1	0	0	Nee ICU	4.Critical/Fatal	5	1	1	1	blank	blank	censored	1	0	0	0	0	1	0	0	0	0	0	0	0	0	blank	0	2020-03-31	1	1	1
598	0	Center_03	275	0	2020-03-17	4	14	1	2020-03-18	M	1	86	9	9	10	0	0	1	0	0	Nee ICU	4.Critical/Fatal	5	1	1	1	blank	blank	censored	1	0	0	0	0	1	0	0	0	0	0	0	0	0	blank	0	2020-03-31	1	1	1
599	0	Center_03	275	0	2020-03-17	5	14	1	2020-03-18	M	1	86	10	10	10	0	0	1	0	0	Nee ICU	4.Critical/Fatal	5	1	1	1	blank	blank	censored	1	0	0	0	0	1	0	0	0	0	0	0	0	0	blank	0	2020-03-31	1	1	1
600	0	Center_03	275	0	2020-03-17	6	14	1	2020-03-18	M	1	86	11	11	12	0	0	1	0	0	Nee ICU	4.Critical/Fatal	5	1	1	1	blank	blank	censored	1	0	0	0	0	1	0	0	0	0	0	0	0	0	blank	0	2020-03-31	1	1	1
601	0	Center_03	275	0	2020-03-17	7	14	1	2020-03-18	M	1	86	12	12	12	0	0	1	0	0	Nee ICU	4.Critical/Fatal	5	1	1	1	blank	blank	censored	1	0	0	0	0	1	0	0	0	0	0	0	0	0	blank	0	2020-03-31	1	1	1
602	0	Center_03	276	1	2020-03-11	6	19	1	2020-03-11	F	0	53	10	10	10	0	0	1	0	0	Nee ICU	3.Severe	3	0	0	1	blank	blank	0	0	0	0	0	0	0	0	0	0	0	0	0	0	0	blank	2020-03-30	0	0	0	0
603	0	Center_03	276	0	2020-03-11	8	19	0	2020-03-11	F	0	53	12	12	12	0	0	1	0	0	Nee ICU	3.Severe	3	0	0	1	blank	blank	0	0	0	0	0	0	0	0	0	0	0	0	0	0	0	blank	2020-03-30	0	0	0	0
604	0	Center_03	276	0	2020-03-11	9	19	0	2020-03-11	F	0	53	13	13	14	0	0	1	0	0	Nee ICU	3.Severe	3	0	0	1	blank	blank	0	0	0	0	0	0	0	0	0	0	0	0	0	0	0	blank	2020-03-30	0	0	0	0
605	0	Center_03	277	1	2020-03-18	2	8	1	2020-03-12	F	0	62	16	16	16	0	0	1	0	0	Nee ICU	3.Severe	3	0	0	1	blank	blank	0	0	0	0	0	0	0	0	0	0	0	0	0	0	0	blank	2020-03-26	0	0	0	0
606	0	Center_03	277	0	2020-03-18	4	8	1	2020-03-12	F	0	62	18	18	18	0	0	1	0	0	Nee ICU	3.Severe	3	0	0	1	blank	blank	0	0	0	0	0	0	0	0	0	0	0	0	0	0	0	blank	2020-03-26	0	0	0	0
607	0	Center_03	277	0	2020-03-18	6	8	1	2020-03-12	F	0	62	20	20	20	0	0	1	0	0	Nee ICU	3.Severe	3	0	0	1	blank	blank	0	0	0	0	0	0	0	0	0	0	0	0	0	0	0	blank	2020-03-26	0	0	0	0
608	0	Center_03	277	0	2020-03-18	7	8	1	2020-03-12	F	0	62	21	22	22	0	0	1	0	0	Nee ICU	3.Severe	3	0	0	1	blank	blank	0	0	0	0	0	0	0	0	0	0	0	0	0	0	0	blank	2020-03-26	0	0	0	0
609	0	Center_03	278	1	2020-03-16	2	5	1	2020-03-18	F	0	69	9	9	10	0	0	1	0	0	Nee ICU	2.Moderate	2	0	0	0	blank	blank	censored	1	0	0	0	1	1	0	0	0	0	0	0	0	0	blank	2020-03-21	0	0	0	0
610	0	Center_03	278	0	2020-03-16	3	5	1	2020-03-18	F	0	69	10	10	10	0	0	1	0	0	Nee ICU	2.Moderate	2	0	0	0	blank	blank	censored	1	0	0	0	1	1	0	0	0	0	0	0	0	0	blank	2020-03-21	0	0	0	0
611	0	Center_03	278	0	2020-03-16	4	5	1	2020-03-18	F	0	69	11	11	12	0	0	1	0	0	Nee ICU	2.Moderate	2	0	0	0	blank	blank	censored	1	0	0	0	1	1	0	0	0	0	0	0	0	0	blank	2020-03-21	0	0	0	0
612	0	Center_03	279	1	2020-03-11	0	16	1	2020-03-12	M	1	77	1	1	2	1	0	1	0	0	Nee ICU	3.Severe	3	0	0	1	blank	blank	censored	1	0	0	0	0	0	1	0	0	0	0	0	1	0	blank	2020-03-27	0	0	0	0
613	0	Center_03	279	0	2020-03-11	2	16	1	2020-03-12	M	1	77	3	3	4	1	0	1	0	0	Nee ICU	3.Severe	3	0	0	1	blank	blank	censored	1	0	0	0	0	0	1	0	0	0	0	0	1	0	blank	2020-03-27	0	0	0	0
614	0	Center_03	279	0	2020-03-11	6	16	1	2020-03-12	M	1	77	7	7	8	1	0	1	0	0	Nee ICU	3.Severe	3	0	0	1	blank	blank	censored	1	0	0	0	0	0	1	0	0	0	0	0	1	0	blank	2020-03-27	0	0	0	0
615	0	Center_03	279	0	2020-03-11	9	16	0	2020-03-12	M	1	77	10	10	10	0	0	1	0	0	Nee ICU	3.Severe	3	0	0	1	blank	blank	censored	1	0	0	0	0	0	1	0	0	0	0	0	1	0	blank	2020-03-27	0	0	0	0
616	0	Center_03	280	1	2020-03-13	0	3	1	2020-03-12	M	1	72	10	10	10	0	0	1	0	0	Nee ICU	2.Moderate	2	0	0	0	blank	blank	0	0	0	0	0	0	0	0	0	0	0	0	0	0	0	blank	2020-03-16	0	0	0	0
617	0	Center_03	281	1	2020-03-01	16	shift	0	2020-03-02	F	0	77					0	0	1	1	Ja ICU	4.Critical/Fatal	4	1	1	1	blank	blank	0	0	0	0	0	0	0	0	0	0	0	0	0	0	0	blank	0	0	0	1	1
618	0	Center_03	282	1	2020-03-19	5		1	2020-03-19	M	1	87	10	10	10	0	0	1	0	0	#N/A	3.Severe	3	0	0	1	blank	blank	#N/A	0	0	0	0	0	0	0	0	0	0	0	0	0	0	blank	#N/A	#N/A	0	0	0
619	0	Center_03	283	1	2020-03-19	1	shift	1	2020-03-19	M	1	66	19	20	20	0	0	0	1	1	Nee ICU	4.Critical/Fatal	4	1	1	1	blank	blank	censored	1	0	0	0	1	0	0	0	0	0	0	0	0	0	blank	0	0	0	1	1
620	0	Center_03	284	1	2020-03-15	4	shift	1	2020-03-16	F	0	82	11	11	12	0	0	1	0	0	Nee ICU	3.Severe	3	0	0	1	blank	blank	censored	1	0	0	0	0	1	0	0	0	0	0	0	0	0	blank	0	0	0	0	0
621	0	Center_03	284	0	2020-03-15	5	shift	1	2020-03-16	F	0	82	12	12	12	0	0	1	0	0	Nee ICU	3.Severe	3	0	0	1	blank	blank	censored	1	0	0	0	0	1	0	0	0	0	0	0	0	0	blank	0	0	0	0	0
622	0	Center_03	284	0	2020-03-15	6	shift	1	2020-03-16	F	0	82	13	13	14	0	0	1	0	0	Nee ICU	3.Severe	3	0	0	1	blank	blank	censored	1	0	0	0	0	1	0	0	0	0	0	0	0	0	blank	0	0	0	0	0
623	0	Center_03	284	0	2020-03-15	7	shift	1	2020-03-16	F	0	82	14	14	14	0	0	1	0	0	Nee ICU	3.Severe	3	0	0	1	blank	blank	censored	1	0	0	0	0	1	0	0	0	0	0	0	0	0	blank	0	0	0	0	0
624	0	Center_03	285	1	2020-03-20	1	5	1	2020-03-20	M	1	78	11	11	12	0	0	1	0	0	Nee ICU	2.Moderate	2	0	0	0	blank	blank	censored	1	1	0	1	0	0	0	0	0	0	0	0	0	0	blank	2020-03-25	0	0	0	0
625	0	Center_03	285	0	2020-03-20	3	5	1	2020-03-20	M	1	78	13	13	14	0	0	1	0	0	Nee ICU	2.Moderate	2	0	0	0	blank	blank	censored	1	1	0	1	0	0	0	0	0	0	0	0	0	0	blank	2020-03-25	0	0	0	0
626	0	Center_03	285	0	2020-03-20	4	5	1	2020-03-20	M	1	78	14	14	14	0	0	1	0	0	Nee ICU	2.Moderate	2	0	0	0	blank	blank	censored	1	1	0	1	0	0	0	0	0	0	0	0	0	0	blank	2020-03-25	0	0	0	0
627	0	Center_03	286	1	2020-03-19	0	5	1	2020-03-20	F	0	69	10	10	10	0	0	1	0	0	Nee ICU	2.Moderate	2	0	0	0	blank	blank	censored	1	0	0	1	0	0	0	0	0	0	0	0	0	0	blank	2020-03-24	0	0	0	0
628	0	Center_03	286	0	2020-03-19	2	5	1	2020-03-20	F	0	69	12	12	12	0	0	1	0	0	Nee ICU	2.Moderate	2	0	0	0	blank	blank	censored	1	0	0	1	0	0	0	0	0	0	0	0	0	0	blank	2020-03-24	0	0	0	0
629	0	Center_03	286	0	2020-03-19	3	5	1	2020-03-20	F	0	69	13	13	14	0	0	1	0	0	Nee ICU	2.Moderate	2	0	0	0	blank	blank	censored	1	0	0	1	0	0	0	0	0	0	0	0	0	0	blank	2020-03-24	0	0	0	0
630	0	Center_03	286	0	2020-03-19	5	5	1	2020-03-20	F	0	69	15	16	16	0	0	1	0	0	Nee ICU	2.Moderate	2	0	0	0	blank	blank	censored	1	0	0	1	0	0	0	0	0	0	0	0	0	0	blank	2020-03-24	0	0	0	0
631	0	Center_03	287	1	2020-03-14	4	shift	1	2020-03-15	M	1	77	8	8	8	0	0	1	0	0	Nee ICU	3.Severe	3	0	0	1	blank	blank	censored	1	0	0	1	1	0	0	0	0	0	0	0	0	0	blank	0	0	0	0	0
632	0	Center_03	287	0	2020-03-14	6	shift	1	2020-03-15	M	1	77	10	10	10	0	0	1	0	0	Nee ICU	3.Severe	3	0	0	1	blank	blank	censored	1	0	0	1	1	0	0	0	0	0	0	0	0	0	blank	0	0	0	0	0
633	0	Center_03	288	1	2020-03-09	7	31	1	2020-03-15	M	1	66	15	16	16	0	0	0	1	1	Ja ICU	4.Critical/Fatal	4	1	1	1	blank	blank	censored	1	0	0	1	1	0	1	0	0	0	0	0	0	0	blank	2020-04-17	0	0	1	1
634	0	Center_03	288	0	2020-03-09	8	31	0	2020-03-15	M	1	66	16	16	16	0	0	0	1	1	Ja ICU	4.Critical/Fatal	4	1	1	1	blank	blank	censored	1	0	0	1	1	0	1	0	0	0	0	0	0	0	blank	2020-04-17	0	0	1	1
635	0	Center_03	288	0	2020-03-09	8	31	0	2020-03-15	M	1	66	16	16	16	0	0	0	1	1	Ja ICU	4.Critical/Fatal	4	1	1	1	blank	blank	censored	1	0	0	1	1	0	1	0	0	0	0	0	0	0	blank	2020-04-17	0	0	1	1
636	0	Center_03	288	0	2020-03-09	9	31	0	2020-03-15	M	1	66	17	18	18	0	0	1	0	1	Ja ICU	4.Critical/Fatal	4	1	1	1	blank	blank	censored	1	0	0	1	1	0	1	0	0	0	0	0	0	0	blank	2020-04-17	0	0	1	1
637	0	Center_03	288	0	2020-03-09	9	31	0	2020-03-15	M	1	66	17	18	18	0	0	1	0	1	Ja ICU	4.Critical/Fatal	4	1	1	1	blank	blank	censored	1	0	0	1	1	0	1	0	0	0	0	0	0	0	blank	2020-04-17	0	0	1	1
638	0	Center_03	288	0	2020-03-09	9	31	0	2020-03-15	M	1	66	17	18	18	0	0	1	0	1	Ja ICU	4.Critical/Fatal	4	1	1	1	blank	blank	censored	1	0	0	1	1	0	1	0	0	0	0	0	0	0	blank	2020-04-17	0	0	1	1
639	0	Center_03	288	0	2020-03-09	9	31	0	2020-03-15	M	1	66	17	18	18	0	0	0	1	1	Ja ICU	4.Critical/Fatal	4	1	1	1	blank	blank	censored	1	0	0	1	1	0	1	0	0	0	0	0	0	0	blank	2020-04-17	0	0	1	1
640	0	Center_03	288	0	2020-03-09	10	31	0	2020-03-15	M	1	66	18	18	18	0	0	1	0	1	Ja ICU	4.Critical/Fatal	4	1	1	1	blank	blank	censored	1	0	0	1	1	0	1	0	0	0	0	0	0	0	blank	2020-04-17	0	0	1	1
641	0	Center_03	288	0	2020-03-09	11	31	0	2020-03-15	M	1	66	19	20	20	0	0	0	1	1	Ja ICU	4.Critical/Fatal	4	1	1	1	blank	blank	censored	1	0	0	1	1	0	1	0	0	0	0	0	0	0	blank	2020-04-17	0	0	1	1
642	0	Center_03	288	0	2020-03-09	11	31	0	2020-03-15	M	1	66	19	20	20	0	0	0	1	1	Ja ICU	4.Critical/Fatal	4	1	1	1	blank	blank	censored	1	0	0	1	1	0	1	0	0	0	0	0	0	0	blank	2020-04-17	0	0	1	1
643	0	Center_03	288	0	2020-03-09	11	31	0	2020-03-09	M	1	66	19	20	20	0	0	0	1	1	Ja ICU	4.Critical/Fatal	4	1	1	1	blank	blank	censored	1	0	0	1	1	0	1	0	0	0	0	0	0	0	blank	2020-04-17	0	0	1	1
644	0	Center_03	289	1	2020-03-18	2	3	1	2020-03-19	M	1	75	5	5	6	1	0	1	0	0	Nee ICU	2.Moderate	2	0	0	0	blank	blank	censored	1	0	1	0	0	0	0	0	0	0	0	0	0	0	blank	2020-03-21	0	0	0	0
645	0	Center_03	290	1	2020-03-18	2	shift	1	2020-03-18	F	0	84	9	9	10	0	0	1	0	0	Nee ICU	3.Severe	3	0	0	1	blank	blank	censored	1	0	1	0	0	1	0	0	0	0	0	0	0	0	blank	0	0	0	0	0
646	0	Center_03	290	0	2020-03-18	4	shift	1	2020-03-18	F	0	84	11	11	12	0	0	1	0	0	Nee ICU	3.Severe	3	0	0	1	blank	blank	censored	1	0	1	0	0	1	0	0	0	0	0	0	0	0	blank	0	0	0	0	0
647	0	Center_03	290	0	2020-03-18	6	shift	1	2020-03-18	F	0	84	13	13	14	0	0	1	0	0	Nee ICU	3.Severe	3	0	0	1	blank	blank	censored	1	0	1	0	0	1	0	0	0	0	0	0	0	0	blank	0	0	0	0	0
648	0	Center_03	291	1	2020-03-16	2	7	1	2020-03-17	M	1	87	14	14	14	0	0	1	0	0	Nee ICU	3.Severe	3	0	0	1	blank	blank	censored	1	0	1	0	0	1	0	0	0	0	0	0	0	0	blank	2020-03-23	0	0	0	0
649	0	Center_03	291	0	2020-03-16	4	7	1	2020-03-17	M	1	87	16	16	16	0	0	1	0	0	Nee ICU	3.Severe	3	0	0	1	blank	blank	censored	1	0	1	0	0	1	0	0	0	0	0	0	0	0	blank	2020-03-23	0	0	0	0
650	0	Center_03	291	0	2020-03-16	6	7	1	2020-03-17	M	1	87	18	18	18	0	0	1	0	0	Nee ICU	3.Severe	3	0	0	1	blank	blank	censored	1	0	1	0	0	1	0	0	0	0	0	0	0	0	blank	2020-03-23	0	0	0	0
651	0	Center_03	292	1	2020-03-14	3	shift	1	2020-03-15	M	1	59	13	13	14	0	0	0	1	1	Ja ICU	4.Critical/Fatal	4	1	1	1	blank	blank	0	0	0	0	0	0	0	0	0	0	0	0	0	0	0	blank	0	0	0	1	1
652	0	Center_03	292	0	2020-03-14	4	shift	1	2020-03-15	M	1	59	14	14	14	0	0	0	1	1	Ja ICU	4.Critical/Fatal	4	1	1	1	blank	blank	0	0	0	0	0	0	0	0	0	0	0	0	0	0	0	blank	0	0	0	1	1
653	0	Center_03	292	0	2020-03-14	5	shift	1	2020-03-15	M	1	59	15	16	16	0	0	0	1	1	Ja ICU	4.Critical/Fatal	4	1	1	1	blank	blank	0	0	0	0	0	0	0	0	0	0	0	0	0	0	0	blank	0	0	0	1	1
654	0	Center_03	293	1	2020-03-02	15	27	0	2020-03-14	M	1	69					0	1	0	0	Nee ICU	3.Severe	3	0	0	1	blank	blank	censored	1	0	0	1	0	0	0	0	0	0	0	0	0	0	blank	2020-03-29	0	0	0	0
655	0	Center_03	293	0	2020-03-02	17	27	0	2020-03-14	M	1	69					0	1	0	0	Nee ICU	3.Severe	3	0	0	1	blank	blank	censored	1	0	0	1	0	0	0	0	0	0	0	0	0	0	blank	2020-03-29	0	0	0	0
656	0	Center_03	294	1	2020-03-13	4	9	1	2020-03-14	F	0	69	14	14	14	0	0	1	0	0	Nee ICU	3.Severe	3	0	0	1	blank	blank	censored	1	0	0	1	1	0	0	0	0	0	0	0	0	0	blank	2020-03-22	0	0	0	0
657	0	Center_03	294	0	2020-03-13	6	9	1	2020-03-14	F	0	69	16	16	16	0	0	1	0	0	Nee ICU	3.Severe	3	0	0	1	blank	blank	censored	1	0	0	1	1	0	0	0	0	0	0	0	0	0	blank	2020-03-22	0	0	0	0
658	0	Center_03	294	0	2020-03-13	7	9	1	2020-03-14	F	0	69	17	18	18	0	0	1	0	0	Nee ICU	3.Severe	3	0	0	1	blank	blank	censored	1	0	0	1	1	0	0	0	0	0	0	0	0	0	blank	2020-03-22	0	0	0	0
659	0	Center_03	295	1	2020-02-24	25	27	0	2020-03-14	F	0	82	19	20	20	0	0	0	1	1	Nee ICU	4.Critical/Fatal	5	1	1	1	blank	blank	censored	1	0	0	0	1	0	0	0	0	0	0	0	0	0	blank	0	2020-03-22	1	1	1
660	0	Center_03	296	1	2020-03-20	3	8	1	2020-03-20	M	1	74	10	10	10	0	0	1	0	0	Nee ICU	3.Severe	3	0	0	1	blank	blank	censored	1	0	0	0	0	1	0	0	0	0	0	0	0	0	blank	2020-03-28	0	0	0	0
661	0	Center_03	296	0	2020-03-20	4	8	1	2020-03-20	M	1	74	11	11	12	0	0	1	0	0	Nee ICU	3.Severe	3	0	0	1	blank	blank	censored	1	0	0	0	0	1	0	0	0	0	0	0	0	0	blank	2020-03-28	0	0	0	0
662	0	Center_03	297	1	2020-03-16	2	5	1	2020-03-19	F	0	55	12	12	12	0	0	1	0	0	Nee ICU	2.Moderate	2	0	0	0	blank	blank	0	0	0	0	0	0	0	0	0	0	0	0	0	0	0	blank	2020-03-21	0	0	0	0
663	0	Center_03	297	0	2020-03-16	4	5	1	2020-03-19	F	0	55	14	14	14	0	0	1	0	0	Nee ICU	2.Moderate	2	0	0	0	blank	blank	0	0	0	0	0	0	0	0	0	0	0	0	0	0	0	blank	2020-03-21	0	0	0	0
664	0	Center_03	298	1	2020-03-19	0	7	1	2020-03-20	M	1	30	3	3	4	1	0	1	0	0	Ja ICU	3.Severe	3	0	0	1	blank	blank	0	0	0	0	0	0	0	0	0	0	0	0	0	0	0	blank	2020-03-26	0	0	0	0
665	0	Center_03	298	0	2020-03-19	2	7	1	2020-03-20	M	1	30	5	5	6	1	0	1	0	0	Ja ICU	3.Severe	3	0	0	1	blank	blank	0	0	0	0	0	0	0	0	0	0	0	0	0	0	0	blank	2020-03-26	0	0	0	0
666	0	Center_03	298	0	2020-03-19	3	7	1	2020-03-20	M	1	30	6	6	6	1	0	1	0	0	Ja ICU	3.Severe	3	0	0	1	blank	blank	0	0	0	0	0	0	0	0	0	0	0	0	0	0	0	blank	2020-03-26	0	0	0	0
667	0	Center_03	298	0	2020-03-19	4	7	1	2020-03-20	M	1	30	7	7	8	1	0	1	0	0	Ja ICU	3.Severe	3	0	0	1	blank	blank	0	0	0	0	0	0	0	0	0	0	0	0	0	0	0	blank	2020-03-26	0	0	0	0
668	0	Center_03	298	0	2020-03-19	5	7	1	2020-03-20	M	1	30	8	8	8	0	0	1	0	0	Ja ICU	3.Severe	3	0	0	1	blank	blank	0	0	0	0	0	0	0	0	0	0	0	0	0	0	0	blank	2020-03-26	0	0	0	0
669	0	Center_03	299	1	2020-03-17	3	10	1	2020-03-11	M	1	58	10	10	10	0	0	1	0	0	Nee ICU	3.Severe	3	0	0	1	blank	blank	censored	1	0	0	0	1	0	1	0	0	0	0	0	0	0	blank	2020-03-27	0	0	0	0
670	0	Center_03	299	0	2020-03-17	5	10	1	2020-03-11	M	1	58	12	12	12	0	0	1	0	0	Nee ICU	3.Severe	3	0	0	1	blank	blank	censored	1	0	0	0	1	0	1	0	0	0	0	0	0	0	blank	2020-03-27	0	0	0	0
671	0	Center_03	299	0	2020-03-17	7	10	1	2020-03-11	M	1	58	14	14	14	0	0	1	0	0	Nee ICU	3.Severe	3	0	0	1	blank	blank	censored	1	0	0	0	1	0	1	0	0	0	0	0	0	0	blank	2020-03-27	0	0	0	0
672	0	Center_03	300	1	2020-03-16	2	10	1	2020-03-17	M	1	55	10	10	10	0	0	1	0	0	Nee ICU	3.Severe	3	0	0	1	blank	blank	censored	1	0	0	1	0	0	0	0	1	0	0	0	0	0	blank	2020-03-26	0	0	0	0
673	0	Center_03	300	0	2020-03-16	3	10	1	2020-03-17	M	1	55	11	11	12	0	0	1	0	0	Nee ICU	3.Severe	3	0	0	1	blank	blank	censored	1	0	0	1	0	0	0	0	1	0	0	0	0	0	blank	2020-03-26	0	0	0	0
674	0	Center_03	300	0	2020-03-16	4	10	1	2020-03-17	M	1	55	12	12	12	0	0	1	0	0	Nee ICU	3.Severe	3	0	0	1	blank	blank	censored	1	0	0	1	0	0	0	0	1	0	0	0	0	0	blank	2020-03-26	0	0	0	0
675	0	Center_03	300	0	2020-03-16	6	10	1	2020-03-17	M	1	55	14	14	14	0	0	1	0	0	Nee ICU	3.Severe	3	0	0	1	blank	blank	censored	1	0	0	1	0	0	0	0	1	0	0	0	0	0	blank	2020-03-26	0	0	0	0
676	0	Center_03	301	1	2020-03-08	0	16	1	2020-03-09	M	1	86	1	1	2	1	0	1	0	0	Nee ICU	3.Severe	3	0	0	1	blank	blank	0	0	0	0	0	0	0	0	0	0	0	0	0	0	0	blank	2020-03-24	0	0	0	0
677	0	Center_03	301	0	2020-03-08	9	16	0	2020-03-09	M	1	86	10	10	10	0	0	1	0	0	Nee ICU	3.Severe	3	0	0	1	blank	blank	0	0	0	0	0	0	0	0	0	0	0	0	0	0	0	blank	2020-03-24	0	0	0	0
678	0	Center_03	301	0	2020-03-08	12	16	0	2020-03-09	M	1	86	13	13	14	0	0	1	0	0	Nee ICU	3.Severe	3	0	0	1	blank	blank	0	0	0	0	0	0	0	0	0	0	0	0	0	0	0	blank	2020-03-24	0	0	0	0
679	0	Center_03	302	1	2020-03-21	2	shift	1	2020-03-22	F	0	93	4	4	4	##	0	1	0	0	Nee ICU	3.Severe	3	0	0	1	blank	blank	0	0	0	0	0	0	0	0	0	0	0	0	0	0	0	blank	0	0	0	0	0
680	0	Center_03	302	0	2020-03-21	3	shift	1	2020-03-22	F	0	93	5	5	6	1	0	1	0	0	Nee ICU	3.Severe	3	0	0	1	blank	blank	0	0	0	0	0	0	0	0	0	0	0	0	0	0	0	blank	0	0	0	0	0
681	0	Center_03	302	0	2020-03-21	4	shift	1	2020-03-22	F	0	93	6	6	6	1	0	1	0	0	Nee ICU	3.Severe	3	0	0	1	blank	blank	0	0	0	0	0	0	0	0	0	0	0	0	0	0	0	blank	0	0	0	0	0
682	0	Center_03	303	1	2020-03-23	2	2	1	2020-03-24	F	0	74	10	10	10	0	0	1	0	0	Nee ICU	2.Moderate	2	0	0	0	blank	blank	censored	1	1	0	0	1	1	0	0	0	0	0	0	0	0	blank	2020-03-25	0	0	0	0
683	0	Center_03	304	1	2020-03-23	2	shift	1	2020-03-24	F	0	73	14	14	14	0	0	1	0	0	Nee ICU	3.Severe	3	0	0	1	blank	blank	0	0	0	0	0	0	0	0	0	0	0	0	0	0	0	blank	0	0	0	0	0
684	0	Center_03	305	1	2020-03-20	3	4	1	2020-03-21	M	1	73	3	3	4	1	0	1	0	0	Nee ICU	2.Moderate	2	0	0	0	blank	blank	censored	1	0	0	0	1	0	0	0	0	0	0	0	0	0	blank	2020-03-24	0	0	0	0
685	0	Center_03	305	0	2020-03-20	4	4	1	2020-03-21	M	1	73	4	4	4	1	0	1	0	0	Nee ICU	2.Moderate	2	0	0	0	blank	blank	censored	1	0	0	0	1	0	0	0	0	0	0	0	0	0	blank	2020-03-24	0	0	0	0
686	0	Center_03	306	1	2020-03-20	1	shift	1	2020-03-21	M	1	57	21	22	22	0	0	1	0	0	Ja ICU	3.Severe	3	0	0	1	blank	blank	0	0	0	0	0	0	0	0	0	0	0	0	0	0	0	blank	0	0	0	0	0
687	0	Center_03	307	1	2020-03-21	1	9	1	2020-03-21	M	1	84	7	7	8	1	0	1	0	0	Nee ICU	4.Critical/Fatal	5	1	1	1	blank	blank	0	0	0	0	0	0	0	0	0	0	0	0	0	0	0	blank	0	2020-03-30	1	1	1
688	0	Center_03	307	0	2020-03-21	3	9	1	2020-03-21	M	1	84	9	9	10	0	0	1	0	0	Nee ICU	4.Critical/Fatal	5	1	1	1	blank	blank	0	0	0	0	0	0	0	0	0	0	0	0	0	0	0	blank	0	2020-03-30	1	1	1
689	0	Center_03	307	0	2020-03-21	4	9	1	2020-03-21	M	1	84	10	10	10	0	0	1	0	0	Nee ICU	4.Critical/Fatal	5	1	1	1	blank	blank	0	0	0	0	0	0	0	0	0	0	0	0	0	0	0	blank	0	2020-03-30	1	1	1
690	0	Center_03	308	1	2020-03-23	1	5	1	2020-03-24	M	1	81	5	5	6	1	0	0	1	1	Nee ICU	4.Critical/Fatal	5	1	1	1	blank	blank	censored	1	0	1	0	0	0	0	0	0	0	0	0	0	0	blank	0	2020-03-28	1	1	1
691	0	Center_03	308	0	2020-03-23	2	5	1	2020-03-24	M	1	81	6	6	6	1	0	0	1	1	Nee ICU	4.Critical/Fatal	5	1	1	1	blank	blank	censored	1	0	1	0	0	0	0	0	0	0	0	0	0	0	blank	0	2020-03-28	1	1	1
692	0	Center_03	309	1	2020-03-21	1	7	1	2020-03-21	M	1	87	4	4	4	1	0	1	0	0	Nee ICU	4.Critical/Fatal	5	1	1	1	blank	blank	censored	1	0	1	0	1	0	1	0	0	0	0	0	0	0	blank	0	2020-03-28	1	1	1
693	0	Center_03	309	0	2020-03-21	2	7	1	2020-03-21	M	1	87	5	5	6	1	0	1	0	0	Nee ICU	4.Critical/Fatal	5	1	1	1	blank	blank	censored	1	0	1	0	1	0	1	0	0	0	0	0	0	0	blank	0	2020-03-28	1	1	1
694	0	Center_03	309	0	2020-03-21	3	7	1	2020-03-21	M	1	87	6	6	6	1	0	1	0	0	Nee ICU	4.Critical/Fatal	5	1	1	1	blank	blank	censored	1	0	1	0	1	0	1	0	0	0	0	0	0	0	blank	0	2020-03-28	1	1	1
695	0	Center_03	309	0	2020-03-21	3	7	1	2020-03-21	M	1	87	6	6	6	1	0	1	0	0	Nee ICU	4.Critical/Fatal	5	1	1	1	blank	blank	censored	1	0	1	0	1	0	1	0	0	0	0	0	0	0	blank	0	2020-03-28	1	1	1
696	0	Center_03	309	0	2020-03-21	4	7	1	2020-03-21	M	1	87	7	7	8	1	0	1	0	0	Nee ICU	4.Critical/Fatal	5	1	1	1	blank	blank	censored	1	0	1	0	1	0	1	0	0	0	0	0	0	0	blank	0	2020-03-28	1	1	1
697	0	Center_03	310	1	2020-03-21	1	7	1	2020-03-21	M	1	57	10	10	10	0	0	1	0	0	Nee ICU	3.Severe	3	0	0	1	blank	blank	0	0	0	0	0	0	0	0	0	0	0	0	0	0	0	blank	2020-03-28	0	0	0	0
698	0	Center_03	310	0	2020-03-21	3	7	1	2020-03-21	M	1	57	12	12	12	0	0	1	0	0	Nee ICU	3.Severe	3	0	0	1	blank	blank	0	0	0	0	0	0	0	0	0	0	0	0	0	0	0	blank	2020-03-28	0	0	0	0
699	0	Center_03	310	0	2020-03-21	4	7	1	2020-03-21	M	1	57	13	13	14	0	0	1	0	0	Nee ICU	3.Severe	3	0	0	1	blank	blank	0	0	0	0	0	0	0	0	0	0	0	0	0	0	0	blank	2020-03-28	0	0	0	0
700	0	Center_03	311	1	2020-03-21	2	shift	1	2020-03-22	F	0	86	8	8	8	0	0	1	0	0	Nee ICU	3.Severe	3	0	0	1	blank	blank	censored	1	1	0	0	0	0	0	0	0	0	0	0	0	0	blank	0	0	0	0	0
701	0	Center_03	311	0	2020-03-21	3	shift	1	2020-03-22	F	0	86	9	9	10	0	0	1	0	0	Nee ICU	3.Severe	3	0	0	1	blank	blank	censored	1	1	0	0	0	0	0	0	0	0	0	0	0	0	blank	0	0	0	0	0
702	0	Center_03	311	0	2020-03-21	4	shift	1	2020-03-22	F	0	86	10	10	10	0	0	1	0	0	Nee ICU	3.Severe	3	0	0	1	blank	blank	censored	1	1	0	0	0	0	0	0	0	0	0	0	0	0	blank	0	0	0	0	0
703	0	Center_03	312	1	2020-03-22	2	3	1	2020-03-24	F	0	76	14	14	14	0	0	1	0	0	Nee ICU	2.Moderate	2	0	0	0	blank	blank	censored	1	0	1	1	1	0	0	0	0	0	0	0	0	0	blank	2020-03-25	0	0	0	0
704	0	Center_03	312	0	2020-03-22	3	3	1	2020-03-24	F	0	76	15	16	16	0	0	1	0	0	Nee ICU	2.Moderate	2	0	0	0	blank	blank	censored	1	0	1	1	1	0	0	0	0	0	0	0	0	0	blank	2020-03-25	0	0	0	0
705	0	Center_03	313	1	2020-03-21	2	9	1	2020-03-22	F	0	41	8	8	8	0	0	1	0	0	Nee ICU	3.Severe	3	0	0	1	blank	blank	censored	1	0	0	0	0	1	0	0	0	0	0	0	0	0	blank	2020-03-30	0	0	0	0
706	0	Center_03	313	0	2020-03-21	3	9	1	2020-03-22	F	0	41	9	9	10	0	0	1	0	0	Nee ICU	3.Severe	3	0	0	1	blank	blank	censored	1	0	0	0	0	1	0	0	0	0	0	0	0	0	blank	2020-03-30	0	0	0	0
707	0	Center_03	313	0	2020-03-21	4	9	1	2020-03-22	F	0	41	10	10	10	0	0	1	0	0	Nee ICU	3.Severe	3	0	0	1	blank	blank	censored	1	0	0	0	0	1	0	0	0	0	0	0	0	0	blank	2020-03-30	0	0	0	0
708	0	Center_03	314	1	2020-03-21	2	shift	1	2020-03-22	F	0	52	14	14	14	0	0	1	0	0	Nee ICU	3.Severe	3	0	0	1	blank	blank	0	0	0	0	0	0	0	0	0	0	0	0	0	0	0	blank	0	0	0	0	0
709	0	Center_03	314	0	2020-03-21	3	shift	1	2020-03-22	F	0	52	15	16	16	0	0	1	0	0	Nee ICU	3.Severe	3	0	0	1	blank	blank	0	0	0	0	0	0	0	0	0	0	0	0	0	0	0	blank	0	0	0	0	0
710	0	Center_03	314	0	2020-03-21	4	shift	1	2020-03-22	F	0	52	16	16	16	0	0	1	0	0	Nee ICU	3.Severe	3	0	0	1	blank	blank	0	0	0	0	0	0	0	0	0	0	0	0	0	0	0	blank	0	0	0	0	0
711	0	Center_03	315	1	2020-03-21	2	shift	1	2020-03-23	M	1	65	9	9	10	0	0	0	1	1	Ja ICU	4.Critical/Fatal	4	1	1	1	blank	blank	censored	1	0	1	1	0	0	0	0	0	0	0	0	0	0	blank	0	0	0	1	1
712	0	Center_03	316	1	2020-03-23	2	2	1	2020-03-24	F	0	70	2	2	2	1	0	1	0	0	Nee ICU	2.Moderate	2	0	0	0	blank	blank	censored	1	0	0	0	0	1	0	0	0	0	0	0	0	0	blank	2020-03-25	0	0	0	0
713	No covid	Center_03	317	1	2020-03-23	2	6	1	not specified	F	0	74					0	0	1	1	Nee ICU	4.Critical/Fatal	5	1	1	1	blank	blank	censored	1	0	1	0	0	0	0	0	1	0	0	0	0	0	blank	0	2020-03-29	1	1	1
714	No covid	Center_03	317	0	2020-03-23	2	6	1	not specified	F	0	74					0	0	1	1	Nee ICU	4.Critical/Fatal	5	1	1	1	blank	blank	censored	1	0	1	0	0	0	0	0	1	0	0	0	0	0	blank	0	2020-03-29	1	1	1
715	0	Center_04	318	1	2020-03-23	1	15	1	2020-03-23	M	1	72	3	3	4	1	0	1	0	0	blank	3.Severe	3	0	0	1	blank	blank	0															blank	2020-04-07	0	0	0	0
716	0	Center_04	318	0	2020-03-23	2	15	1	2020-03-23	M	1	72	4	4	4	1	0	1	0	0	blank	3.Severe	3	0	0	1	blank	blank	0															blank	2020-04-07	0	0	0	0
717	0	Center_04	318	0	2020-03-23	4	15	1	2020-03-23	M	1	72	6	6	6	1	0	1	0	0	blank	3.Severe	3	0	0	1	blank	blank	0															blank	2020-04-07	0	0	0	0
718	0	Center_04	318	0	2020-03-23	7	15	1	2020-03-23	M	1	72	9	9	10	0	0	1	0	0	blank	3.Severe	3	0	0	1	blank	blank	0															blank	2020-04-07	0	0	0	0
719	0	Center_04	318	0	2020-03-23	9	15	0	2020-03-23	M	1	72	11	11	12	0	0	1	0	0	blank	3.Severe	3	0	0	1	blank	blank	0															blank	2020-04-07	0	0	0	0
720	0	Center_04	319	1	2020-03-21	2	shift	1	2020-03-21	M	1	65	7	7	8	1	0	0	1	1	blank	4.Critical/Fatal	4	1	1	1	blank	blank	0															blank	?	0	0	1	1
721	0	Center_04	319	0	2020-03-21	3	shift	1	2020-03-21	M	1	65	8	8	8	0	0	0	1	1	blank	4.Critical/Fatal	4	1	1	1	blank	blank	0															blank	?	0	0	1	1
722	0	Center_04	319	0	2020-03-21	4	shift	1	2020-03-21	M	1	65	9	9	10	0	0	0	1	1	blank	4.Critical/Fatal	4	1	1	1	blank	blank	0															blank	?	0	0	1	1
723	0	Center_04	319	0	2020-03-21	5	shift	1	2020-03-21	M	1	65	10	10	10	0	0	0	1	1	blank	4.Critical/Fatal	4	1	1	1	blank	blank	0															blank	?	0	0	1	1
724	0	Center_04	319	0	2020-03-21	6	shift	1	2020-03-21	M	1	65	11	11	12	0	0	0	1	1	blank	4.Critical/Fatal	4	1	1	1	blank	blank	0															blank	?	0	0	1	1
725	0	Center_04	319	0	2020-03-21	9	shift	0	2020-03-21	M	1	65	14	14	14	0	0	0	1	1	blank	4.Critical/Fatal	4	1	1	1	blank	blank	0															blank	?	0	0	1	1
726	0	Center_04	319	0	2020-03-21	10	shift	0	2020-03-21	M	1	65	15	16	16	0	0	0	1	1	blank	4.Critical/Fatal	4	1	1	1	blank	blank	0															blank	?	0	0	1	1
727	0	Center_04	319	0	2020-03-21	11	shift	0	2020-03-21	M	1	65	16	16	16	0	0	0	1	1	blank	4.Critical/Fatal	4	1	1	1	blank	blank	0															blank	?	0	0	1	1
728	0	Center_04	319	0	2020-03-21	12	shift	0	2020-03-21	M	1	65	17	18	18	0	0	0	1	1	blank	4.Critical/Fatal	4	1	1	1	blank	blank	0															blank	?	0	0	1	1
729	0	Center_04	319	0	2020-03-21	13	shift	0	2020-03-21	M	1	65	18	18	18	0	0	0	1	1	blank	4.Critical/Fatal	4	1	1	1	blank	blank	0															blank	?	0	0	1	1
730	0	Center_04	320	1	2020-03-30	0	20	1	2020-03-30	M	1	63	10	10	10	0	0	0	1	1	blank	4.Critical/Fatal	4	1	1	1	blank	blank	0															blank	2020-05-01	0	0	1	1
731	0	Center_04	321	1	2020-03-27	0	3	1	2020-03-27	F	0	48	14	14	14	0	0	1	0	0	blank	2.Moderate	2	0	0	0	blank	blank	0															blank	2020-03-30	0	0	0	0
732	0	Center_04	321	0	2020-03-27	3	3	1	2020-03-27	F	0	48	17	18	18	0	0	1	0	0	blank	2.Moderate	2	0	0	0	blank	blank	0															blank	2020-03-30	0	0	0	0
733	0	Center_04	322	1	2020-03-24	0	6	1	2020-03-24	M	1	76	14	14	14	0	0	1	0	0	blank	3.Severe	3	0	0	1	blank	blank	0															blank	2020-03-30	0	0	0	0
734	0	Center_04	322	0	2020-03-24	1	6	1	2020-03-24	M	1	76	15	16	16	0	0	1	0	0	blank	3.Severe	3	0	0	1	blank	blank	0															blank	2020-03-30	0	0	0	0
735	0	Center_04	323	1	2020-03-30	0	10	1	2020-03-30	M	1	48	6	6	6	1	0	1	0	0	blank	3.Severe	3	0	0	1	blank	blank	0															blank	2020-04-09	0	0	0	0
736	0	Center_04	323	0	2020-03-30	4	10	1	2020-03-30	M	1	48	10	10	10	0	0	1	0	0	blank	3.Severe	3	0	0	1	blank	blank	0															blank	2020-04-09	0	0	0	0
737	0	Center_04	324	1	2020-03-27	3	13	1	2020-03-27	F	0	68	4	4	4	1	0	1	0	0	blank	3.Severe	3	0	0	1	blank	blank	0															blank	2020-04-09	0	0	0	0
738	0	Center_04	325	1	2020-03-28	2	4	1	2020-03-28	F	0	51	9	9	10	0	0	1	0	0	blank	2.Moderate	2	0	0	0	blank	blank	0															blank	2020-04-01	0	0	0	0
739	0	Center_04	326	1	2020-03-30	0	31	1	2020-03-30	M	1	73	9	9	10	0	0	0	1	1	blank	4.Critical/Fatal	5	1	1	1	blank	blank	0															blank		1	1	1	1
740	0	Center_04	326	0	2020-03-30	1	31	1	2020-03-30	M	1	73	10	10	10	0	0	0	1	1	blank	4.Critical/Fatal	5	1	1	1	blank	blank	0															blank		1	1	1	1
741	0	Center_04	326	0	2020-03-30	2	31	1	2020-03-30	M	1	73	11	11	12	0	0	0	1	1	blank	4.Critical/Fatal	5	1	1	1	blank	blank	0															blank		1	1	1	1
742	0	Center_04	326	0	2020-03-30	3	31	1	2020-03-30	M	1	73	12	12	12	0	0	0	1	1	blank	4.Critical/Fatal	5	1	1	1	blank	blank	0															blank		1	1	1	1
743	0	Center_04	326	0	2020-03-30	4	31	1	2020-03-30	M	1	73	13	13	14	0	0	0	1	1	blank	4.Critical/Fatal	5	1	1	1	blank	blank	0															blank		1	1	1	1
744	0	Center_04	327	1	2020-03-30	1	8	1	2020-03-30	M	1	78	4	4	4	1	0	1	0	0	blank	3.Severe	3	0	0	1	blank	blank	0															blank	2020-04-07	0	0	0	0
745	0	Center_04	328	1	2020-03-30	2	5	1	2020-03-30	M	1	75	9	9	10	0	0	1	0	0	blank	4.Critical/Fatal	5	1	1	1	blank	blank	0															blank		2020-04-04	1	1	1
746	0	Center_04	328	0	2020-03-30	3	5	1	2020-03-30	M	1	75	10	10	10	0	0	1	0	0	blank	4.Critical/Fatal	5	1	1	1	blank	blank	0															blank		2020-04-04	1	1	1
747	0	Center_04	329	1	2020-03-31	0	7	1	2020-03-31	F	0	55	12	12	12	0	0	1	0	0	blank	3.Severe	3	0	0	1	blank	blank	0															blank	2020-04-07	0	0	0	0
748	0	Center_04	329	0	2020-03-31	1	7	1	2020-03-31	F	0	55	13	13	14	0	0	1	0	0	blank	3.Severe	3	0	0	1	blank	blank	0															blank	2020-04-07	0	0	0	0
749	0	Center_04	329	0	2020-03-31	2	7	1	2020-03-31	F	0	55	14	14	14	0	0	1	0	0	blank	3.Severe	3	0	0	1	blank	blank	0															blank	2020-04-07	0	0	0	0
750	0	Center_04	329	0	2020-03-31	3	7	1	2020-03-31	F	0	55	15	16	16	0	0	1	0	0	blank	3.Severe	3	0	0	1	blank	blank	0															blank	2020-04-07	0	0	0	0
751	0	Center_04	330	1	2020-03-31	0	4	1	2020-03-31	M	1	48	2	2	2	1	0	1	0	0	blank	2.Moderate	2	0	0	0	blank	blank	0															blank	2020-04-04	0	0	0	0
752	0	Center_04	331	1	2020-03-16	8	31	0	2020-03-16	M	1	78	2	2	2	1	0	0	1	1	blank	4.Critical/Fatal	5	1	1	1	blank	blank	0															blank		1	1	1	1
753	0	Center_04	331	0	2020-03-16	9	31	0	2020-03-16	M	1	78	3	3	4	1	0	0	1	1	blank	4.Critical/Fatal	5	1	1	1	blank	blank	0															blank		1	1	1	1
754	0	Center_04	331	0	2020-03-16	10	31	0	2020-03-16	M	1	78	4	4	4	1	0	0	1	1	blank	4.Critical/Fatal	5	1	1	1	blank	blank	0															blank		1	1	1	1
755	0	Center_04	331	0	2020-03-16	11	31	0	2020-03-16	M	1	78	5	5	6	1	0	0	1	1	blank	4.Critical/Fatal	5	1	1	1	blank	blank	0															blank		1	1	1	1
756	0	Center_04	331	0	2020-03-16	14	31	0	2020-03-16	M	1	78	8	8	8	0	0	0	1	1	blank	4.Critical/Fatal	5	1	1	1	blank	blank	0															blank		1	1	1	1
757	0	Center_04	331	0	2020-03-16	15	31	0	2020-03-16	M	1	78	9	9	10	0	0	0	1	1	blank	4.Critical/Fatal	5	1	1	1	blank	blank	0															blank		1	1	1	1
758	0	Center_04	331	0	2020-03-16	16	31	0	2020-03-16	M	1	78	10	10	10	0	0	0	1	1	blank	4.Critical/Fatal	5	1	1	1	blank	blank	0															blank		1	1	1	1
759	0	Center_04	331	0	2020-03-16	17	31	0	2020-03-16	M	1	78	11	11	12	0	0	0	1	1	blank	4.Critical/Fatal	5	1	1	1	blank	blank	0															blank		1	1	1	1
760	0	Center_04	331	0	2020-03-16	18	31	0	2020-03-16	M	1	78	12	12	12	0	0	0	1	1	blank	4.Critical/Fatal	5	1	1	1	blank	blank	0															blank		1	1	1	1
761	0	Center_04	332	1	2020-03-31	0	0	1	2020-03-31	M	1	61	1	1	2	1	0	1	0	0	blank	4.Critical/Fatal	5	1	1	1	blank	blank	0															blank		2020-03-31	1	1	1
762	0	Center_04	332	0	2020-03-31	0	0	1	2020-03-31	M	1	61	1	1	2	1	0	1	0	0	blank	4.Critical/Fatal	5	1	1	1	blank	blank	0															blank		2020-03-31	1	1	1
763	0	Center_04	333	1	2020-03-27	5	12	1	2020-03-27	F	0	28	5	5	6	1	0	0	1	1	blank	4.Critical/Fatal	4	1	1	1	blank	blank	0															blank	2020-04-08	0	0	1	1
764	0	Center_04	333	0	2020-03-27	6	12	1	2020-03-27	F	0	28	6	6	6	1	0	0	1	1	blank	4.Critical/Fatal	4	1	1	1	blank	blank	0															blank	2020-04-08	0	0	1	1
765	0	Center_04	333	0	2020-03-27	7	12	1	2020-03-27	F	0	28	7	7	8	1	0	0	1	1	blank	4.Critical/Fatal	4	1	1	1	blank	blank	0															blank	2020-04-08	0	0	1	1
766	0	Center_04	334	1	2020-03-29	2	11	1	2020-03-29	M	1	64	14	14	14	0	0	1	0	0	blank	3.Severe	3	0	0	1	blank	blank	0															blank	2020-04-09	0	0	0	0
767	0	Center_04	334	0	2020-03-29	3	11	1	2020-03-29	M	1	64	15	16	16	0	0	1	0	0	blank	3.Severe	3	0	0	1	blank	blank	0															blank	2020-04-09	0	0	0	0
768	0	Center_04	335	1	2020-03-13	10	32	0	2020-03-13	F	0	69	3	3	4	1	0	0	1	1	blank	4.Critical/Fatal	4	1	1	1	blank	blank	0															blank	2020-04-14	0	0	1	1
769	0	Center_04	335	0	2020-03-13	11	32	0	2020-03-13	F	0	69	4	4	4	1	0	0	1	1	blank	4.Critical/Fatal	4	1	1	1	blank	blank	0															blank	2020-04-14	0	0	1	1
770	0	Center_04	335	0	2020-03-13	12	32	0	2020-03-13	F	0	69	5	5	6	1	0	0	1	1	blank	4.Critical/Fatal	4	1	1	1	blank	blank	0															blank	2020-04-14	0	0	1	1
771	0	Center_04	335	0	2020-03-13	13	32	0	2020-03-13	F	0	69	6	6	6	1	0	0	1	1	blank	4.Critical/Fatal	4	1	1	1	blank	blank	0															blank	2020-04-14	0	0	1	1
772	0	Center_04	335	0	2020-03-13	14	32	0	2020-03-13	F	0	69	7	7	8	1	0	0	1	1	blank	4.Critical/Fatal	4	1	1	1	blank	blank	0															blank	2020-04-14	0	0	1	1
773	0	Center_04	335	0	2020-03-13	19	32	0	2020-03-13	F	0	69	12	12	12	0	0	0	1	1	blank	4.Critical/Fatal	4	1	1	1	blank	blank	0															blank	2020-04-14	0	0	1	1
774	0	Center_04	335	0	2020-03-13	20	32	0	2020-03-13	F	0	69	13	13	14	0	0	0	1	1	blank	4.Critical/Fatal	4	1	1	1	blank	blank	0															blank	2020-04-14	0	0	1	1
775	0	Center_04	335	0	2020-03-13	21	32	0	2020-03-13	F	0	69	14	14	14	0	0	0	1	1	blank	4.Critical/Fatal	4	1	1	1	blank	blank	0															blank	2020-04-14	0	0	1	1
776	0	Center_04	336	1	2020-04-01	1	5	1	2020-04-01	M	1	89	2	2	2	1	0	1	0	0	blank	4.Critical/Fatal	5	1	1	1	blank	blank	0															blank		2020-04-06	1	1	1
777	0	Center_04	337	1	2020-04-02	0	13	1	2020-04-02	M	1	81	7	7	8	1	0	1	0	0	blank	3.Severe	3	0	0	1	blank	blank	0															blank	2020-04-15	0	0	0	0
778	0	Center_04	338	1	2020-03-17	3	3	1	2020-03-17	M	1	79	1	1	2	1	0	1	0	0	blank	2.Moderate	2	0	0	0	blank	blank	0															blank	2020-03-20	0	0	0	0
779	0	Center_04	339	1	2020-04-02	0	0	1	?	F	0	48	1	1	2	1	1	0	0	1	blank	1.Mild	1	0	0	0	blank	blank	0															blank	2020-04-02	0	0	0	0
780	0	Center_04	340	1	2020-04-02	0	0	1	?	M	1	35	1	1	2	1	1	0	0	1	blank	1.Mild	1	0	0	0	blank	Influenza	0															blank	2020-04-02	0	0	0	0
781	0	Center_04	341	1	2020-03-11	9	31	0	2020-03-11	F	0	74	6	6	6	1	0	0	1	1	blank	4.Critical/Fatal	5	1	1	1	blank	blank	0															blank		2020-04-11	1	1	1
782	0	Center_04	341	0	2020-03-11	12	31	0	2020-03-11	F	0	74	9	9	10	0	0	0	1	1	blank	4.Critical/Fatal	5	1	1	1	blank	blank	0															blank		2020-04-11	1	1	1
783	0	Center_04	341	0	2020-03-11	13	31	0	2020-03-11	F	0	74	10	10	10	0	0	0	1	1	blank	4.Critical/Fatal	5	1	1	1	blank	blank	0															blank		2020-04-11	1	1	1
784	0	Center_04	341	0	2020-03-11	14	31	0	2020-03-11	F	0	74	11	11	12	0	0	0	1	1	blank	4.Critical/Fatal	5	1	1	1	blank	blank	0															blank		2020-04-11	1	1	1
785	0	Center_04	341	0	2020-03-11	15	31	0	2020-03-11	F	0	74	12	12	12	0	0	0	1	1	blank	4.Critical/Fatal	5	1	1	1	blank	blank	0															blank		2020-04-11	1	1	1
786	0	Center_04	341	0	2020-03-11	16	31	0	2020-03-11	F	0	74	13	13	14	0	0	0	1	1	blank	4.Critical/Fatal	5	1	1	1	blank	blank	0															blank		2020-04-11	1	1	1
787	0	Center_04	341	0	2020-03-11	21	31	0	2020-03-11	F	0	74	18	18	18	0	0	0	1	1	blank	4.Critical/Fatal	5	1	1	1	blank	blank	0															blank		2020-04-11	1	1	1
788	0	Center_04	341	0	2020-03-11	22	31	0	2020-03-11	F	0	74	19	20	20	0	0	0	1	1	blank	4.Critical/Fatal	5	1	1	1	blank	blank	0															blank		2020-04-11	1	1	1
789	0	Center_04	341	0	2020-03-11	23	31	0	2020-03-11	F	0	74	20	20	20	0	0	0	1	1	blank	4.Critical/Fatal	5	1	1	1	blank	blank	0															blank		2020-04-11	1	1	1
790	0	Center_04	342	1	2020-04-03	0	0	1	?	M	1	76	1	1	2	1	1	0	0	1	blank	1.Mild	1	0	0	0	blank	blank	0															blank	2020-04-03	0	0	0	0
791	0	Center_04	343	1	2020-03-31	3	5	1	2020-03-31	M	1	68	11	11	12	0	0	1	0	0	blank	2.Moderate	2	0	0	0	blank	blank	0															blank	2020-04-05	0	0	0	0
792	0	Center_04	344	1	2020-04-03	0	5	1	verd op basis ct	F	0	68	1	1	2	1	0	1	0	0	blank	2.Moderate	2	0	0	0	blank	blank	0															blank	2020-04-08	0	0	0	0
793	0	Center_04	345	1	2020-04-01	2	2	1	2020-04-01	F	0	79	4	4	4	1	0	1	0	0	blank	4.Critical/Fatal	5	1	1	1	blank	blank	0															blank		2020-04-03	1	1	1
794	0	Center_04	346	1	2020-03-24	0		1	2020-03-24	F	0	72	3	3	4	1	0	1	0	0	blank	3.Severe	3	0	0	1	blank	blank	0															blank	2020-03-30	0	0	0	0
795	0	Center_04	346	0	2020-03-24	3		1	2020-03-24	F	0	72	6	6	6	1	0	1	0	0	blank	3.Severe	3	0	0	1	blank	blank	0															blank	?	0	0	0	0
796	0	Center_04	347	1	2020-03-14	10	13	0	2020-03-14	M	1	74	1	1	2	1	0	1	0	0	blank	3.Severe	3	0	0	1	blank	blank	0															blank	2020-03-27	0	0	0	0
797	0	Center_04	347	0	2020-03-14	11	13	0	2020-03-14	M	1	74	2	2	2	1	0	1	0	0	blank	3.Severe	3	0	0	1	blank	blank	0															blank	2020-03-27	0	0	0	0
798	0	Center_04	348	1	2020-03-17	3	6	1	2020-03-17	M	1	78	14	14	14	0	0	1	0	0	blank	4.Critical/Fatal	5	1	1	1	blank	blank	0															blank		2020-03-23	1	1	1
799	0	Center_04	348	0	2020-03-17	6	6	1	2020-03-17	M	1	78	17	18	18	0	0	1	0	0	blank	4.Critical/Fatal	5	1	1	1	blank	blank	0															blank		2020-03-23	1	1	1
800	0	Center_04	349	1	2020-03-19	4	28	1	2020-03-19	M	1	49	6	6	6	1	0	0	1	1	blank	4.Critical/Fatal	4	1	1	1	blank	blank	0															blank	2020-04-16	0	0	1	1
801	0	Center_04	349	0	2020-03-19	4	28	1	2020-03-19	M	1	49	6	6	6	1	0	0	1	1	blank	4.Critical/Fatal	4	1	1	1	blank	blank	0															blank	2020-04-16	0	0	1	1
802	0	Center_04	349	0	2020-03-19	5	28	1	2020-03-19	M	1	49	7	7	8	1	0	0	1	1	blank	4.Critical/Fatal	4	1	1	1	blank	blank	0															blank	2020-04-16	0	0	1	1
803	0	Center_04	349	0	2020-03-19	6	28	1	2020-03-19	M	1	49	8	8	8	0	0	0	1	1	blank	4.Critical/Fatal	4	1	1	1	blank	blank	0															blank	2020-04-16	0	0	1	1
804	0	Center_04	349	0	2020-03-19	7	28	1	2020-03-19	M	1	49	9	9	10	0	0	0	1	1	blank	4.Critical/Fatal	4	1	1	1	blank	blank	0															blank	2020-04-16	0	0	1	1
805	0	Center_04	349	0	2020-03-19	12	28	0	2020-03-19	M	1	49	14	14	14	0	0	0	1	1	blank	4.Critical/Fatal	4	1	1	1	blank	blank	0															blank	2020-04-16	0	0	1	1
806	0	Center_04	349	0	2020-03-19	13	28	0	2020-03-19	M	1	49	15	16	16	0	0	0	1	1	blank	4.Critical/Fatal	4	1	1	1	blank	blank	0															blank	2020-04-16	0	0	1	1
807	0	Center_04	349	0	2020-03-19	14	28	0	2020-03-19	M	1	49	16	16	16	0	0	0	1	1	blank	4.Critical/Fatal	4	1	1	1	blank	blank	0															blank	2020-04-16	0	0	1	1
808	0	Center_04	349	0	2020-03-19	15	28	0	2020-03-19	M	1	49	17	18	18	0	0	0	1	1	blank	4.Critical/Fatal	4	1	1	1	blank	blank	0															blank	2020-04-16	0	0	1	1
809	0	Center_04	350	1	2020-03-15	5	31	1	2020-03-15	M	1	56	7	7	8	1	0	0	1	1	blank	4.Critical/Fatal	4	1	1	1	blank	blank	0															blank	2020-04-15	0	0	1	1
810	0	Center_04	350	0	2020-03-15	8	31	0	2020-03-15	M	1	56	10	10	10	0	0	0	1	1	blank	4.Critical/Fatal	4	1	1	1	blank	blank	0															blank	2020-04-15	0	0	1	1
811	0	Center_04	350	0	2020-03-15	9	31	0	2020-03-15	M	1	56	11	11	12	0	0	0	1	1	blank	4.Critical/Fatal	4	1	1	1	blank	blank	0															blank	2020-04-15	0	0	1	1
812	0	Center_04	350	0	2020-03-15	10	31	0	2020-03-15	M	1	56	12	12	12	0	0	0	1	1	blank	4.Critical/Fatal	4	1	1	1	blank	blank	0															blank	2020-04-15	0	0	1	1
813	0	Center_04	350	0	2020-03-15	11	31	0	2020-03-15	M	1	56	13	13	14	0	0	0	1	1	blank	4.Critical/Fatal	4	1	1	1	blank	blank	0															blank	2020-04-15	0	0	1	1
814	0	Center_04	350	0	2020-03-15	12	31	0	2020-03-15	M	1	56	14	14	14	0	0	0	1	1	blank	4.Critical/Fatal	4	1	1	1	blank	blank	0															blank	2020-04-15	0	0	1	1
815	0	Center_04	350	0	2020-03-15	17	31	0	2020-03-15	M	1	56	19	20	20	0	0	0	1	1	blank	4.Critical/Fatal	4	1	1	1	blank	blank	0															blank	2020-04-15	0	0	1	1
816	0	Center_04	350	0	2020-03-15	18	31	0	2020-03-15	M	1	56	20	20	20	0	0	0	1	1	blank	4.Critical/Fatal	4	1	1	1	blank	blank	0															blank	2020-04-15	0	0	1	1
817	0	Center_04	350	0	2020-03-15	19	31	0	2020-03-15	M	1	56	21	22	22	0	0	0	1	1	blank	4.Critical/Fatal	4	1	1	1	blank	blank	0															blank	2020-04-15	0	0	1	1
818	0	Center_04	351	1	2020-03-19	5	5	1	2020-03-19	M	1	45	9	9	10	0	0	1	0	0	blank	2.Moderate	2	0	0	0	blank	blank	0															blank	2020-03-24	0	0	0	0
819	0	Center_04	352	1	2020-03-23	0	3	1	2020-03-23	F	0	71	5	5	6	1	0	1	0	0	blank	2.Moderate	2	0	0	0	blank	blank	0															blank	2020-03-26	0	0	0	0
820	0	Center_04	352	0	2020-03-23	2	3	1	2020-03-23	F	0	71	7	7	8	1	0	1	0	0	blank	2.Moderate	2	0	0	0	blank	blank	0															blank	2020-03-26	0	0	0	0
821	0	Center_04	353	1	2020-03-21	2	4	1	2020-03-21	M	1	52	7	7	8	1	0	0	1	1	blank	4.Critical/Fatal	4	1	1	1	blank	blank	0															blank	2020-03-25	0	0	1	1
822	0	Center_04	353	0	2020-03-21	3	4	1	2020-03-21	M	1	52	8	8	8	0	0	0	1	1	blank	4.Critical/Fatal	4	1	1	1	blank	blank	0															blank	2020-03-25	0	0	1	1
823	0	Center_04	353	0	2020-03-21	4	4	1	2020-03-21	M	1	52	9	9	10	0	0	0	1	1	blank	4.Critical/Fatal	4	1	1	1	blank	blank	0															blank	2020-03-25	0	0	1	1
824	0	Center_04	354	1	2020-03-20	3	4	1	2020-03-20	M	1	72	9	9	10	0	0	1	0	0	blank	2.Moderate	2	0	0	0	blank	blank	0															blank	2020-03-24	0	0	0	0
825	0	Center_04	355	1	2020-03-19	1	29	1	2020-03-19	M	1	51	14	14	14	0	0	0	1	1	blank	4.Critical/Fatal	4	1	1	1	blank	blank	0															blank	2020-04-17	0	0	1	1
826	0	Center_04	355	0	2020-03-19	5	29	1	2020-03-19	M	1	51	18	18	18	0	0	0	1	1	blank	4.Critical/Fatal	4	1	1	1	blank	blank	0															blank	2020-04-17	0	0	1	1
827	0	Center_04	355	0	2020-03-19	6	29	1	2020-03-19	M	1	51	19	20	20	0	0	0	1	1	blank	4.Critical/Fatal	4	1	1	1	blank	blank	0															blank	2020-04-17	0	0	1	1
828	0	Center_04	355	0	2020-03-19	7	29	1	2020-03-19	M	1	51	20	20	20	0	0	0	1	1	blank	4.Critical/Fatal	4	1	1	1	blank	blank	0															blank	2020-04-17	0	0	1	1
829	0	Center_04	355	0	2020-03-19	8	29	0	2020-03-19	M	1	51	21	22	22	0	0	0	1	1	blank	4.Critical/Fatal	4	1	1	1	blank	blank	0															blank	2020-04-17	0	0	1	1
830	0	Center_04	355	0	2020-03-19	11	29	0	2020-03-19	M	1	51	24	24	24	0	0	0	1	1	blank	4.Critical/Fatal	4	1	1	1	blank	blank	0															blank	2020-04-17	0	0	1	1
831	0	Center_04	355	0	2020-03-19	12	29	0	2020-03-19	M	1	51	25	26	26	0	0	0	1	1	blank	4.Critical/Fatal	4	1	1	1	blank	blank	0															blank	2020-04-17	0	0	1	1
832	0	Center_04	355	0	2020-03-19	13	29	0	2020-03-19	M	1	51	26	26	26	0	0	0	1	1	blank	4.Critical/Fatal	4	1	1	1	blank	blank	0															blank	2020-04-17	0	0	1	1
833	0	Center_04	355	0	2020-03-19	14	29	0	2020-03-19	M	1	51	27	28	28	0	0	0	1	1	blank	4.Critical/Fatal	4	1	1	1	blank	blank	0															blank	2020-04-17	0	0	1	1
834	0	Center_04	355	0	2020-03-19	15	29	0	2020-03-19	M	1	51	28	28	28	0	0	0	1	1	blank	4.Critical/Fatal	4	1	1	1	blank	blank	0															blank	2020-04-17	0	0	1	1
835	0	Center_04	356	1	2020-03-18	2	38	1	2020-03-18	M	1	55	5	5	6	1	0	0	1	1	blank	4.Critical/Fatal	4	1	1	1	blank	blank	0															blank	2020-05-01	0	0	1	1
836	0	Center_04	356	0	2020-03-18	5	38	1	2020-03-18	M	1	55	8	8	8	0	0	0	1	1	blank	4.Critical/Fatal	4	1	1	1	blank	blank	0															blank	2020-05-01	0	0	1	1
837	0	Center_04	356	0	2020-03-18	6	38	1	2020-03-18	M	1	55	9	9	10	0	0	0	1	1	blank	4.Critical/Fatal	4	1	1	1	blank	blank	0															blank	2020-05-01	0	0	1	1
838	0	Center_04	356	0	2020-03-18	7	38	1	2020-03-18	M	1	55	10	10	10	0	0	0	1	1	blank	4.Critical/Fatal	4	1	1	1	blank	blank	0															blank	2020-05-01	0	0	1	1
839	0	Center_04	356	0	2020-03-18	8	38	0	2020-03-18	M	1	55	11	11	12	0	0	0	1	1	blank	4.Critical/Fatal	4	1	1	1	blank	blank	0															blank	2020-05-01	0	0	1	1
840	0	Center_04	356	0	2020-03-18	9	38	0	2020-03-18	M	1	55	12	12	12	0	0	0	1	1	blank	4.Critical/Fatal	4	1	1	1	blank	blank	0															blank	2020-05-01	0	0	1	1
841	0	Center_04	356	0	2020-03-18	12	38	0	2020-03-18	M	1	55	15	16	16	0	0	0	1	1	blank	4.Critical/Fatal	4	1	1	1	blank	blank	0															blank	2020-05-01	0	0	1	1
842	0	Center_04	356	0	2020-03-18	13	38	0	2020-03-18	M	1	55	16	16	16	0	0	0	1	1	blank	4.Critical/Fatal	4	1	1	1	blank	blank	0															blank	2020-05-01	0	0	1	1
843	0	Center_04	356	0	2020-03-18	14	38	0	2020-03-18	M	1	55	17	18	18	0	0	0	1	1	blank	4.Critical/Fatal	4	1	1	1	blank	blank	0															blank	2020-05-01	0	0	1	1
844	0	Center_04	356	0	2020-03-18	15	38	0	2020-03-18	M	1	55	18	18	18	0	0	0	1	1	blank	4.Critical/Fatal	4	1	1	1	blank	blank	0															blank	2020-05-01	0	0	1	1
845	0	Center_04	356	0	2020-03-18	16	38	0	2020-03-18	M	1	55	19	20	20	0	0	0	1	1	blank	4.Critical/Fatal	4	1	1	1	blank	blank	0															blank	2020-05-01	0	0	1	1
846	0	Center_04	357	1	2020-03-23	0	1	1	2020-03-23	M	1	64	10	10	10	0	0	1	0	0	blank	2.Moderate	2	0	0	0	blank	blank	0															blank	2020-03-24	0	0	0	0
847	0	Center_04	358	1	2020-03-23	0	0	1	2020-03-23	F	0	31	5	5	6	1	1	0	0	1	0	1.Mild	1	0	0	0	blank	blank	0															blank	2020-03-23	0	0	0	0
848	0	Center_04	359	1	2020-03-22	1	12	1	2020-03-22	F	0	85	7	7	8	1	0	1	0	0	blank	3.Severe	3	0	0	1	blank	blank	0															blank	2020-04-03	0	0	0	0
849	0	Center_04	359	0	2020-03-22	3	12	1	2020-03-22	F	0	85	9	9	10	0	0	1	0	0	blank	3.Severe	3	0	0	1	blank	blank	0															blank	2020-04-03	0	0	0	0
850	0	Center_04	359	0	2020-03-22	9	12	0	2020-03-22	F	0	85	15	16	16	0	0	1	0	0	blank	3.Severe	3	0	0	1	blank	blank	0															blank	2020-04-03	0	0	0	0
851	0	Center_04	360	1	2020-03-23	1	27	1	2020-03-23	F	0	64	7	7	8	1	0	0	1	1	blank	4.Critical/Fatal	4	1	1	1	blank	blank	0															blank	2020-04-19	0	0	1	1
852	0	Center_04	360	0	2020-03-23	2	27	1	2020-03-23	F	0	64	8	8	8	0	0	0	1	1	blank	4.Critical/Fatal	4	1	1	1	blank	blank	0															blank	2020-04-19	0	0	1	1
853	0	Center_04	360	0	2020-03-23	3	27	1	2020-03-23	F	0	64	9	9	10	0	0	0	1	1	blank	4.Critical/Fatal	4	1	1	1	blank	blank	0															blank	2020-04-19	0	0	1	1
854	0	Center_04	360	0	2020-03-23	4	27	1	2020-03-23	F	0	64	10	10	10	0	0	0	1	1	blank	4.Critical/Fatal	4	1	1	1	blank	blank	0															blank	2020-04-19	0	0	1	1
855	0	Center_04	360	0	2020-03-23	7	27	1	2020-03-23	F	0	64	13	13	14	0	0	0	1	1	blank	4.Critical/Fatal	4	1	1	1	blank	blank	0															blank	2020-04-19	0	0	1	1
856	0	Center_04	360	0	2020-03-23	8	27	0	2020-03-23	F	0	64	14	14	14	0	0	0	1	1	blank	4.Critical/Fatal	4	1	1	1	blank	blank	0															blank	2020-04-19	0	0	1	1
857	0	Center_04	360	0	2020-03-23	9	27	0	2020-03-23	F	0	64	15	16	16	0	0	0	1	1	blank	4.Critical/Fatal	4	1	1	1	blank	blank	0															blank	2020-04-19	0	0	1	1
858	0	Center_04	360	0	2020-03-23	10	27	0	2020-03-23	F	0	64	16	16	16	0	0	0	1	1	blank	4.Critical/Fatal	4	1	1	1	blank	blank	0															blank	2020-04-19	0	0	1	1
859	0	Center_04	360	0	2020-03-23	10	27	0	2020-03-23	F	0	64	17	18	18	0	0	0	1	1	blank	4.Critical/Fatal	4	1	1	1	blank	blank	0															blank	2020-04-19	0	0	1	1
860	0	Center_04	360	0	2020-03-23	11	27	0	2020-03-23	F	0	64	18	18	18	0	0	0	1	1	blank	4.Critical/Fatal	4	1	1	1	blank	blank	0															blank	2020-04-19	0	0	1	1
861	0	Center_04	361	1	2020-03-23	1	30	1	2020-03-23	M	1	52	10	10	10	0	0	0	1	1	blank	4.Critical/Fatal	4	1	1	1	blank	blank	0															blank	2020-05-01	0	0	1	1
862	0	Center_04	361	0	2020-03-23	2	30	1	2020-03-23	M	1	52	11	11	12	0	0	0	1	1	blank	4.Critical/Fatal	4	1	1	1	blank	blank	0															blank	2020-05-01	0	0	1	1
863	0	Center_04	361	0	2020-03-23	9	30	0	2020-03-23	M	1	52	18	18	18	0	0	0	1	1	blank	4.Critical/Fatal	4	1	1	1	blank	blank	0															blank	2020-05-01	0	0	1	1
864	0	Center_04	361	0	2020-03-23	10	30	0	2020-03-23	M	1	52	19	20	20	0	0	0	1	1	blank	4.Critical/Fatal	4	1	1	1	blank	blank	0															blank	2020-05-01	0	0	1	1
865	0	Center_04	361	0	2020-03-23	11	30	0	2020-03-23	M	1	52	20	20	20	0	0	0	1	1	blank	4.Critical/Fatal	4	1	1	1	blank	blank	0															blank	2020-05-01	0	0	1	1
866	0	Center_04	362	1	2020-03-25	0	0	1	?	M	1	43	10	10	10	0	1	0	0	1	0	1.Mild	1	0	0	0	blank	blank	0															blank	2020-03-25	0	0	0	0
867	0	Center_04	363	1	2020-03-24	2	3	1	2020-03-24	M	1	75	12	12	12	0	0	1	0	0	blank	2.Moderate	2	0	0	0	blank	blank	0															blank	2020-03-27	0	0	0	0
868	0	Center_04	364	1	2020-03-21	4	11	1	2020-03-21	F	0	57	7	7	8	1	0	1	0	0	blank	3.Severe	3	0	0	1	blank	blank	0															blank	2020-04-01	0	0	0	0
869	0	Center_04	364	0	2020-03-21	6	11	1	2020-03-21	F	0	57	9	9	10	0	0	1	0	0	blank	3.Severe	3	0	0	1	blank	blank	0															blank	2020-04-01	0	0	0	0
870	0	Center_04	365	1	2020-03-25	0	17	1	2020-03-25	M	1	53	11	11	12	0	0	1	0	0	blank	3.Severe	3	0	0	1	blank	blank	0															blank	2020-04-11	0	0	0	0
871	0	Center_04	365	0	2020-03-25	5	17	1	2020-03-25	M	1	53	16	16	16	0	0	1	0	0	blank	3.Severe	3	0	0	1	blank	blank	0															blank	2020-04-11	0	0	0	0
872	0	Center_04	365	0	2020-03-25	6	17	1	2020-03-25	M	1	53	17	18	18	0	0	1	0	0	blank	3.Severe	3	0	0	1	blank	blank	0															blank	2020-04-11	0	0	0	0
873	0	Center_04	365	0	2020-03-25	7	17	1	2020-03-25	M	1	53	18	18	18	0	0	1	0	0	blank	3.Severe	3	0	0	1	blank	blank	0															blank	2020-04-11	0	0	0	0
874	0	Center_04	365	0	2020-03-25	8	17	0	2020-03-25	M	1	53	19	20	20	0	0	1	0	0	blank	3.Severe	3	0	0	1	blank	blank	0															blank	2020-04-11	0	0	0	0
875	0	Center_04	365	0	2020-03-25	9	17	0	2020-03-25	M	1	53	20	20	20	0	0	1	0	0	blank	3.Severe	3	0	0	1	blank	blank	0															blank	2020-04-11	0	0	0	0
876	0	Center_04	366	1	2020-03-22	3	4	1	2020-03-22	M	1	51	8	8	8	0	0	1	0	0	blank	2.Moderate	2	0	0	0	blank	blank	0															blank	2020-03-26	0	0	0	0
877	0	Center_04	367	1	2020-03-25	0	7	1	2020-03-25	M	1	55	15	16	16	0	0	1	0	0	blank	3.Severe	3	0	0	1	blank	blank	0															blank	2020-04-01	0	0	0	0
878	0	Center_04	367	0	2020-03-25	2	7	1	2020-03-25	M	1	55	17	18	18	0	0	1	0	0	blank	3.Severe	3	0	0	1	blank	blank	0															blank	2020-04-01	0	0	0	0
879	0	Center_04	368	1	2020-03-24	10	11	0	2020-03-24	F	0	53	12	12	12	0	0	0	1	1	blank	4.Critical/Fatal	4	1	1	1	blank	blank	0															blank	2020-04-04	0	0	1	1
880	0	Center_04	369	1	2020-03-22	3	8	1	2020-03-22	M	1	58	10	10	10	0	0	1	0	0	blank	3.Severe	3	0	0	1	blank	blank	0															blank	2020-03-30	0	0	0	0
881	0	Center_04	369	0	2020-03-22	5	8	1	2020-03-22	M	1	58	12	12	12	0	0	1	0	0	blank	3.Severe	3	0	0	1	blank	blank	0															blank	2020-03-30	0	0	0	0
882	0	Center_04	369	0	2020-03-22	8	8	0	2020-03-22	M	1	58	15	16	16	0	0	1	0	0	blank	3.Severe	3	0	0	1	blank	blank	0															blank	2020-03-30	0	0	0	0
883	0	Center_04	370	1	2020-03-25	0	0	1	?	M	1	65	6	6	6	1	1	0	0	1	0	1.Mild	1	0	0	0	blank	blank	0															blank	2020-03-25	0	0	0	0
884	0	Center_04	371	1	2020-03-26	0	0	1	?	F	0	56	9	9	10	0	1	0	0	1	0	1.Mild	1	0	0	0	blank	blank	0															blank	2020-03-26	0	0	0	0
885	0	Center_04	372	1	2020-03-20	5	10	1	2020-03-20	F	0	73	3	3	4	1	0	1	0	0	blank	3.Severe	3	0	0	1	blank	blank	0															blank	2020-03-30	0	0	0	0
886	0	Center_04	373	1	2020-03-25	0	2	1	2020-03-25	M	1	73	4	4	4	1	0	1	0	0	blank	2.Moderate	2	0	0	0	blank	blank	0															blank	2020-03-27	0	0	0	0
887	0	Center_04	374	1	2020-03-24	0	2	1	2020-03-24	M	1	40	1	1	2	1	0	1	0	0	blank	2.Moderate	2	0	0	0	blank	blank	0															blank	2020-03-26	0	0	0	0
888	0	Center_04	375	1	2020-03-24	0	9	1	2020-03-24	M	1	73	10	10	10	0	0	1	0	0	blank	3.Severe	3	0	0	1	blank	blank	0															blank	2020-04-02	0	0	0	0
889	0	Center_04	375	0	2020-03-24	2	9	1	2020-03-24	M	1	73	12	12	12	0	0	1	0	0	blank	3.Severe	3	0	0	1	blank	blank	0															blank	2020-04-02	0	0	0	0
890	0	Center_04	375	0	2020-03-24	6	9	1	2020-03-24	M	1	73	16	16	16	0	0	1	0	0	blank	3.Severe	3	0	0	1	blank	blank	0															blank	2020-04-02	0	0	0	0
891	0	Center_04	376	1	2020-03-25	0	2	1	?	M	1	54	7	7	8	1	0	1	0	0	blank	2.Moderate	2	0	0	0	blank	blank	0															blank	2020-03-27	0	0	0	0
892	0	Center_04	376	0	2020-03-27	0	1	1	?	M	1	54	12	12	12	0	0	1	0	0	blank	2.Moderate	2	0	0	0	blank	blank	0															blank	2020-03-27	0	0	0	0
893	0	Center_04	377	1	2020-03-25	0	27	1	2020-03-25	M	1	50	4	4	4	1	0	0	1	1	blank	4.Critical/Fatal	4	1	1	1	blank	blank	0															blank	2020-04-21	0	0	1	1
894	0	Center_04	377	0	2020-03-25	1	27	1	2020-03-25	M	1	50	5	5	6	1	0	0	1	1	blank	4.Critical/Fatal	4	1	1	1	blank	blank	0															blank	2020-04-21	0	0	1	1
895	0	Center_04	377	0	2020-03-25	2	27	1	2020-03-25	M	1	50	6	6	6	1	0	0	1	1	blank	4.Critical/Fatal	4	1	1	1	blank	blank	0															blank	2020-04-21	0	0	1	1
896	0	Center_04	377	0	2020-03-25	5	27	1	2020-03-25	M	1	50	9	9	10	0	0	0	1	1	blank	4.Critical/Fatal	4	1	1	1	blank	blank	0															blank	2020-04-21	0	0	1	1
897	0	Center_04	377	0	2020-03-25	6	27	1	2020-03-25	M	1	50	10	10	10	0	0	0	1	1	blank	4.Critical/Fatal	4	1	1	1	blank	blank	0															blank	2020-04-21	0	0	1	1
898	0	Center_04	377	0	2020-03-25	7	27	1	2020-03-25	M	1	50	11	11	12	0	0	0	1	1	blank	4.Critical/Fatal	4	1	1	1	blank	blank	0															blank	2020-04-21	0	0	1	1
899	0	Center_04	377	0	2020-03-25	8	27	0	2020-03-25	M	1	50	12	12	12	0	0	0	1	1	blank	4.Critical/Fatal	4	1	1	1	blank	blank	0															blank	2020-04-21	0	0	1	1
900	0	Center_04	377	0	2020-03-25	9	27	0	2020-03-25	M	1	50	13	13	14	0	0	0	1	1	blank	4.Critical/Fatal	4	1	1	1	blank	blank	0															blank	2020-04-21	0	0	1	1
901	0	Center_04	378	1	2020-03-24	0	30	1	2020-03-24	F	0	60	7	7	8	1	0	0	1	1	blank	4.Critical/Fatal	4	1	1	1	blank	blank	0															blank	2020-05-01	0	0	1	1
902	0	Center_04	378	0	2020-03-24	2	30	1	2020-03-24	F	0	60	9	9	10	0	0	0	1	1	blank	4.Critical/Fatal	4	1	1	1	blank	blank	0															blank	2020-05-01	0	0	1	1
903	0	Center_04	378	0	2020-03-24	3	30	1	2020-03-24	F	0	60	10	10	10	0	0	0	1	1	blank	4.Critical/Fatal	4	1	1	1	blank	blank	0															blank	2020-05-01	0	0	1	1
904	0	Center_04	378	0	2020-03-24	6	30	1	2020-03-24	F	0	60	13	13	14	0	0	0	1	1	blank	4.Critical/Fatal	4	1	1	1	blank	blank	0															blank	2020-05-01	0	0	1	1
905	0	Center_04	378	0	2020-03-24	7	30	1	2020-03-24	F	0	60	14	14	14	0	0	0	1	1	blank	4.Critical/Fatal	4	1	1	1	blank	blank	0															blank	2020-05-01	0	0	1	1
906	0	Center_04	378	0	2020-03-24	8	30	0	2020-03-24	F	0	60	15	16	16	0	0	0	1	1	blank	4.Critical/Fatal	4	1	1	1	blank	blank	0															blank	2020-05-01	0	0	1	1
907	0	Center_04	378	0	2020-03-24	9	30	0	2020-03-24	F	0	60	16	16	16	0	0	0	1	1	blank	4.Critical/Fatal	4	1	1	1	blank	blank	0															blank	2020-05-01	0	0	1	1
908	0	Center_04	378	0	2020-03-24	10	30	0	2020-03-24	F	0	60	17	18	18	0	0	0	1	1	blank	4.Critical/Fatal	4	1	1	1	blank	blank	0															blank	2020-05-01	0	0	1	1
909	0	Center_04	379	1	2020-03-25	0	0	1	?	M	1	49	5	5	6	1	1	0	0	1	0	1.Mild	1	0	0	0	blank	blank	0															blank	2020-03-25	0	0	0	0
910	0	Center_04	380	1	2020-03-24	0	0	1	?	M	1	51	9	9	10	0	1	0	0	1	0	1.Mild	1	0	0	0	blank	blank	0															blank	2020-03-24	0	0	0	0
911	0	Center_04	381	1	2020-03-23	2	2	1	2020-03-23	M	1	55	7	7	8	1	0	1	0	0	blank	2.Moderate	2	0	0	0	blank	blank	0															blank	2020-03-25	0	0	0	0
912	0	Center_04	382	1	2020-03-23	2	6	1	2020-03-23	F	0	74	4	4	4	1	0	1	0	0	blank	4.Critical/Fatal	5	1	1	1	blank	blank	0															blank		2020-03-29	1	1	1
913	0	Center_04	383	1	2020-03-21	4	7	1	2020-03-21	F	0	70	4	4	4	1	0	1	0	0	blank	3.Severe	3	0	0	1	blank	blank	0															blank	2020-03-28	0	0	0	0
914	0	Center_04	384	1	2020-03-25	1	30	1	2020-03-25	F	0	64	4	4	4	1	0	0	1	1	blank	4.Critical/Fatal	4	1	1	1	blank	blank	0															blank	2020-05-01	0	0	1	1
915	0	Center_04	384	0	2020-03-25	2	30	1	2020-03-25	F	0	64	5	5	6	1	0	0	1	1	blank	4.Critical/Fatal	4	1	1	1	blank	blank	0															blank	2020-05-01	0	0	1	1
916	0	Center_04	384	0	2020-03-25	5	30	1	2020-03-25	F	0	64	8	8	8	0	0	0	1	1	blank	4.Critical/Fatal	4	1	1	1	blank	blank	0															blank	2020-05-01	0	0	1	1
917	0	Center_04	384	0	2020-03-25	6	30	1	2020-03-25	F	0	64	9	9	10	0	0	0	1	1	blank	4.Critical/Fatal	4	1	1	1	blank	blank	0															blank	2020-05-01	0	0	1	1
918	0	Center_04	384	0	2020-03-25	7	30	1	2020-03-25	F	0	64	10	10	10	0	0	0	1	1	blank	4.Critical/Fatal	4	1	1	1	blank	blank	0															blank	2020-05-01	0	0	1	1
919	0	Center_04	384	0	2020-03-25	8	30	0	2020-03-25	F	0	64	11	11	12	0	0	0	1	1	blank	4.Critical/Fatal	4	1	1	1	blank	blank	0															blank	2020-05-01	0	0	1	1
920	0	Center_04	384	0	2020-03-25	8	30	0	2020-03-25	F	0	64	12	12	12	0	0	0	1	1	blank	4.Critical/Fatal	4	1	1	1	blank	blank	0															blank	2020-05-01	0	0	1	1
921	0	Center_04	385	1	2020-03-25	1	3	1	2020-03-25	M	1	64	7	7	8	1	0	1	0	0	blank	4.Critical/Fatal	5	1	1	1	blank	blank	0															blank		2020-03-28	1	1	1
922	0	Center_04	386	1	2020-03-26	0	7	1	2020-03-26	F	0	71	2	2	2	1	0	1	0	0	blank	3.Severe	3	0	0	1	blank	blank	0															blank	2020-04-02	0	0	0	0
923	0	Center_04	386	0	2020-03-26	1	7	1	2020-03-26	F	0	71	3	3	4	1	0	1	0	0	blank	3.Severe	3	0	0	1	blank	blank	0															blank	2020-04-02	0	0	0	0
924	0	Center_04	387	1	2020-03-22	4	5	1	2020-03-22	M	1	77	4	4	4	1	0	1	0	0	blank	2.Moderate	2	0	0	0	blank	blank	0															blank	2020-03-27	0	0	0	0
925	0	Center_04	388	1	2020-03-25	1	1	1	2020-03-25	F	0	69	2	2	2	1	0	1	0	0	blank	2.Moderate	2	0	0	0	blank	blank	0															blank	2020-03-26	0	0	0	0
926	0	Center_04	389	1	2020-03-24	2	8	1	2020-03-24	M	1	76	7	7	8	1	0	1	0	0	blank	3.Severe	3	0	0	1	blank	blank	0															blank	2020-04-01	0	0	0	0
927	0	Center_04	389	0	2020-03-24	6	8	1	2020-03-24	M	1	76	11	11	12	0	0	1	0	0	blank	3.Severe	3	0	0	1	blank	blank	0															blank	2020-04-01	0	0	0	0
928	0	Center_04	390	1	2020-03-24	2	13	1	2020-03-24	F	0	80	6	6	6	1	0	1	0	0	blank	3.Severe	3	0	0	1	blank	blank	0															blank	2020-04-06	0	0	0	0
929	0	Center_04	390	0	2020-03-24	6	13	1	2020-03-24	F	0	80	10	10	10	0	0	1	0	0	blank	3.Severe	3	0	0	1	blank	blank	0															blank	2020-04-06	0	0	0	0
930	0	Center_04	390	0	2020-03-24	10	13	0	2020-03-24	F	0	80	14	14	14	0	0	1	0	0	blank	3.Severe	3	0	0	1	blank	blank	0															blank	2020-04-06	0	0	0	0
931	0	Center_04	391	1	2020-03-26	0	3	1	2020-03-26	M	1	84	6	6	6	1	0	1	0	0	blank	4.Critical/Fatal	5	1	1	1	blank	blank	0															blank		2020-03-29	1	1	1
932	0	Center_04	392	1	2020-03-25	2	8	1	2020-03-25	F	0	85	14	14	14	0	0	1	0	0	blank	4.Critical/Fatal	5	1	1	1	blank	blank	0															blank		2020-04-02	1	1	1
933	0	Center_04	392	0	2020-03-25	5	8	1	2020-03-25	F	0	85	17	18	18	0	0	1	0	0	blank	4.Critical/Fatal	5	1	1	1	blank	blank	0															blank		2020-04-02	1	1	1
934	0	Center_04	393	1	2020-03-22	5	9	1	2020-03-22	M	1	83	10	10	10	0	0	1	0	0	blank	3.Severe	3	0	0	1	blank	blank	0															blank	2020-03-31	0	0	0	0
935	0	Center_04	394	1	2020-03-18	2	3	1	2020-03-18	M	1	51	1	1	2	1	0	1	0	0	blank	2.Moderate	2	0	0	0	blank	blank	0															blank	2020-03-21	0	0	0	0
936	0	Center_04	395	1	2020-03-25	2	2	1	2020-03-25	F	0	67	10	10	10	0	0	1	0	0	blank	2.Moderate	2	0	0	0	blank	blank	0															blank	2020-03-27	0	0	0	0
937	0	Center_04	396	1	2020-03-25	2	5	1	2020-03-25	M	1	70	10	10	10	0	0	1	0	0	blank	2.Moderate	2	0	0	0	blank	blank	0															blank	2020-03-30	0	0	0	0
938	0	Center_04	397	1	2020-03-25	2	5	1	2020-03-25	M	1	79	8	8	8	0	0	1	0	0	blank	2.Moderate	2	0	0	0	blank	blank	0															blank	2020-03-30	0	0	0	0
939	0	Center_04	397	0	2020-03-25	5	5	1	2020-03-25	M	1	79	11	11	12	0	0	1	0	0	blank	2.Moderate	2	0	0	0	blank	blank	0															blank	2020-03-30	0	0	0	0
940	0	Center_04	398	1	2020-03-21	6	10	1	2020-03-21	M	1	63	7	7	8	1	0	1	0	0	blank	3.Severe	3	0	0	1	blank	blank	0															blank	2020-03-31	0	0	0	0
941	0	Center_04	399	1	2020-03-28	2	5	1	2020-03-28	M	1	72	12	12	12	0	0	1	0	0	blank	2.Moderate	2	0	0	0	blank	blank	0															blank	2020-04-02	0	0	0	0
942	0	Center_04	400	1	2020-03-30	0	15	1	2020-03-30	F	0	87	2	2	2	1	0	1	0	0	blank	3.Severe	3	0	0	1	blank	blank	0															blank	2020-04-14	0	0	0	0
943	0	Center_04	400	0	2020-03-30	1	15	1	2020-03-30	F	0	87	3	3	4	1	0	1	0	0	blank	3.Severe	3	0	0	1	blank	blank	0															blank	2020-04-14	0	0	0	0
944	0	Center_04	400	0	2020-03-30	4	15	1	2020-03-30	F	0	87	6	6	6	1	0	1	0	0	blank	3.Severe	3	0	0	1	blank	blank	0															blank	2020-04-14	0	0	0	0
945	0	Center_04	401	1	2020-03-26	4	27	1	2020-03-26	M	1	53	9	9	10	0	0	0	1	1	blank	4.Critical/Fatal	4	1	1	1	blank	blank	0															blank	2020-04-22	0	0	1	1
946	0	Center_04	401	0	2020-03-26	5	27	1	2020-03-26	M	1	53	10	10	10	0	0	0	1	1	blank	4.Critical/Fatal	4	1	1	1	blank	blank	0															blank	2020-04-22	0	0	1	1
947	0	Center_04	401	0	2020-03-26	6	27	1	2020-03-26	M	1	53	11	11	12	0	0	0	1	1	blank	4.Critical/Fatal	4	1	1	1	blank	blank	0															blank	2020-04-22	0	0	1	1
948	0	Center_04	401	0	2020-03-26	7	27	1	2020-03-26	M	1	53	12	12	12	0	0	0	1	1	blank	4.Critical/Fatal	4	1	1	1	blank	blank	0															blank	2020-04-22	0	0	1	1
949	0	Center_04	401	0	2020-03-26	8	27	0	2020-03-26	M	1	53	13	13	14	0	0	0	1	1	blank	4.Critical/Fatal	4	1	1	1	blank	blank	0															blank	2020-04-22	0	0	1	1
950	0	Center_04	402	1	2020-03-27	3	12	1	2020-03-27	M	1	85	5	5	6	1	0	1	0	0	blank	3.Severe	3	0	0	1	blank	blank	0															blank	2020-04-08	0	0	0	0
951	0	Center_04	403	1	2020-03-28	2	18	1	2020-03-28	M	1	77	7	7	8	1	0	1	0	0	blank	3.Severe	3	0	0	1	blank	blank	0															blank	2020-04-15	0	0	0	0
952	0	Center_04	404	1	2020-03-28	2	11	1	2020-03-28	M	1	71	5	5	6	1	0	1	0	0	blank	3.Severe	3	0	0	1	blank	blank	0															blank	2020-04-08	0	0	0	0
953	0	Center_04	405	1	2020-03-28	2	30	1	2020-03-28	F	0	55	5	5	6	1	0	0	1	1	blank	4.Critical/Fatal	4	1	1	1	blank	blank	0															blank	2020-05-01	0	0	1	1
954	0	Center_04	405	0	2020-03-28	5	30	1	2020-03-28	F	0	55	8	8	8	0	0	0	1	1	blank	4.Critical/Fatal	4	1	1	1	blank	blank	0															blank	2020-05-01	0	0	1	1
955	0	Center_04	405	0	2020-03-28	5	30	1	2020-03-28	F	0	55	8	8	8	0	0	0	1	1	blank	4.Critical/Fatal	4	1	1	1	blank	blank	0															blank	2020-05-01	0	0	1	1
956	0	Center_04	405	0	2020-03-28	6	30	1	2020-03-28	F	0	55	9	9	10	0	0	0	1	1	blank	4.Critical/Fatal	4	1	1	1	blank	blank	0															blank	2020-05-01	0	0	1	1
957	0	Center_04	406	1	2020-03-30	0	30	1	2020-03-30	F	0	71	14	14	14	0	0	0	1	1	blank	4.Critical/Fatal	5	1	1	1	blank	blank	0															blank		1	1	1	1
958	0	Center_04	406	0	2020-03-30	2	30	1	2020-03-30	F	0	71	15	16	16	0	0	0	1	1	blank	4.Critical/Fatal	5	1	1	1	blank	blank	0															blank		1	1	1	1
959	0	Center_04	406	0	2020-03-30	3	30	1	2020-03-30	F	0	71	16	16	16	0	0	0	1	1	blank	4.Critical/Fatal	5	1	1	1	blank	blank	0															blank		1	1	1	1
960	0	Center_04	406	0	2020-03-30	4	30	1	2020-03-30	F	0	71	17	18	18	0	0	0	1	1	blank	4.Critical/Fatal	5	1	1	1	blank	blank	0															blank		1	1	1	1
961	0	Center_04	407	1	2020-03-18	2	21	1	2020-03-18	M	1	75	4	4	4	1	0	1	0	0	blank	3.Severe	3	0	0	1	blank	blank	0															blank	2020-04-08	0	0	0	0
962	0	Center_04	407	0	2020-03-18	6	21	1	2020-03-18	M	1	75	8	8	8	0	0	1	0	0	blank	3.Severe	3	0	0	1	blank	blank	0															blank	2020-04-08	0	0	0	0
963	0	Center_04	407	0	2020-03-18	7	21	1	2020-03-18	M	1	75	9	9	10	0	0	1	0	0	blank	3.Severe	3	0	0	1	blank	blank	0															blank	2020-04-08	0	0	0	0
964	0	Center_04	407	0	2020-03-18	9	21	0	2020-03-18	M	1	75	11	11	12	0	0	1	0	0	blank	3.Severe	3	0	0	1	blank	blank	0															blank	2020-04-08	0	0	0	0
965	0	Center_04	407	0	2020-03-18	13	21	0	2020-03-18	M	1	75	15	16	16	0	0	1	0	0	blank	3.Severe	3	0	0	1	blank	blank	0															blank	2020-04-08	0	0	0	0
966	0	Center_04	408	1	2020-03-27	0	6	1	2020-03-27	M	1	73	10	10	10	0	0	1	0	0	blank	3.Severe	3	0	0	1	blank	blank	0															blank	2020-04-02	0	0	0	0
967	0	Center_04	408	0	2020-03-27	3	6	1	2020-03-27	M	1	73	13	13	14	0	0	1	0	0	blank	3.Severe	3	0	0	1	blank	blank	0															blank	2020-04-02	0	0	0	0
968	0	Center_04	409	1	2020-03-28	2	6	1	2020-03-28	M	1	75	7	7	8	1	0	1	0	0	blank	3.Severe	3	0	0	1	blank	blank	0															blank	2020-04-03	0	0	0	0
969	0	Center_04	409	0	2020-03-28	5	6	1	2020-03-28	M	1	75	16	16	16	0	0	1	0	0	blank	3.Severe	3	0	0	1	blank	blank	0															blank	2020-04-02	0	0	0	0
970	0	Center_04	410	1	2020-03-30	0	4	1	2020-03-30	M	1	74	6	6	6	1	0	1	0	0	blank	2.Moderate	2	0	0	0	blank	blank	0															blank	2020-04-06	0	0	0	0
971	0	Center_04	410	0	2020-03-30	2	4	1	2020-03-30	M	1	74	9	9	10	0	0	1	0	0	blank	2.Moderate	2	0	0	0	blank	blank	0															blank	2020-04-03	0	0	0	0
972	0	Center_04	411	1	2020-03-30	0	6	1	2020-03-30	F	0	62	4	4	4	1	0	1	0	0	blank	3.Severe	3	0	0	1	blank	blank	0															blank	2020-04-05	0	0	0	0
973	0	Center_04	412	1	2020-03-28	2	30	1	2020-03-28	F	0	63	7	7	8	1	0	0	1	1	blank	4.Critical/Fatal	4	1	1	1	blank	blank	0															blank	2020-05-01	0	0	1	1
974	0	Center_04	412	0	2020-03-28	5	30	1	2020-03-28	F	0	63	10	10	10	0	0	0	1	1	blank	4.Critical/Fatal	4	1	1	1	blank	blank	0															blank	2020-05-01	0	0	1	1
975	0	Center_04	412	0	2020-03-28	6	30	1	2020-03-28	F	0	63	11	11	12	0	0	0	1	1	blank	4.Critical/Fatal	4	1	1	1	blank	blank	0															blank	2020-05-01	0	0	1	1
976	0	Center_04	413	1	2020-03-27	0	30	1	2020-03-27	M	1	68	8	8	8	0	0	0	1	1	blank	4.Critical/Fatal	4	1	1	1	blank	blank	0															blank	2020-05-01	0	0	1	1
977	0	Center_04	413	0	2020-03-27	3	30	1	2020-03-27	M	1	68	11	11	12	0	0	0	1	1	blank	4.Critical/Fatal	4	1	1	1	blank	blank	0															blank	2020-05-01	0	0	1	1
978	0	Center_04	413	0	2020-03-27	4	30	1	2020-03-27	M	1	68	12	12	12	0	0	0	1	1	blank	4.Critical/Fatal	4	1	1	1	blank	blank	0															blank	2020-05-01	0	0	1	1
979	0	Center_04	413	0	2020-03-27	5	30	1	2020-03-27	M	1	68	13	13	14	0	0	0	1	1	blank	4.Critical/Fatal	4	1	1	1	blank	blank	0															blank	2020-05-01	0	0	1	1
980	0	Center_04	413	0	2020-03-27	6	30	1	2020-03-27	M	1	68	14	14	14	0	0	0	1	1	blank	4.Critical/Fatal	4	1	1	1	blank	blank	0															blank	2020-05-01	0	0	1	1
981	0	Center_04	413	0	2020-03-27	7	30	1	2020-03-27	M	1	68	15	16	16	0	0	0	1	1	blank	4.Critical/Fatal	4	1	1	1	blank	blank	0															blank	2020-05-01	0	0	1	1
982	0	Center_05	414	1	2020-04-05	1	7	1		F	0	78	5	5	6	1	0	1	0	0		3.Severe	3	0	0	1			censored	1	1	0	0	0	0	0	0	0	0	0	0	0	0		2020-04-12	0	0	0	0
983	0	Center_05	415	1	2020-04-05	1	15	1		F	0	72	4	4	4	1	0	1	0	0		3.Severe	3	0	0	1			censored	1	0	0	1	0	0	1	0	0	0	0	0	0	0		2020-04-20	0	0	0	0
984	0	Center_05	416	1	2020-03-24	0	9	1		F	0	72	4	4	4	1	0	1	0	0		3.Severe	3	0	0	1			censored	1	1	0	1	0	0	0	0	0	0	0	0	0	0		2020-04-02	0	0	0	0
985	0	Center_05	416	0	2020-03-24	1	9	1		F	0	72	5	5	6	1	0	1	0	0		3.Severe	3	0	0	1			censored	1	1	0	1	0	0	0	0	0	0	0	0	0	0		2020-04-02	0	0	0	0
986	0	Center_05	417	1	2020-03-28	0	17	1		F	0	66	17	18	18	0	0	1	0	0		3.Severe	3	0	0	1			censored	1	1	0	1	0	0	0	0	0	0	0	0	0	0		2020-04-14	0	0	0	0
987	0	Center_05	417	0	2020-03-28	1	17	1		F	0	66	18	18	18	0	0	1	0	0		3.Severe	3	0	0	1			censored	1	1	0	1	0	0	0	0	0	0	0	0	0	0		2020-04-14	0	0	0	0
988	0	Center_05	417	0	2020-03-28	2	17	1		F	0	66	19	20	20	0	0	1	0	0		3.Severe	3	0	0	1			censored	1	1	0	1	0	0	0	0	0	0	0	0	0	0		2020-04-14	0	0	0	0
989	0	Center_05	417	0	2020-03-28	4	17	1		F	0	66	20	20	20	0	0	1	0	0		3.Severe	3	0	0	1			censored	1	1	0	1	0	0	0	0	0	0	0	0	0	0		2020-04-14	0	0	0	0
990	0	Center_05	417	0	2020-03-28	7	17	1		F	0	66	23	24	24	0	0	1	0	0		3.Severe	3	0	0	1			censored	1	1	0	1	0	0	0	0	0	0	0	0	0	0		2020-04-14	0	0	0	0
991	0	Center_05	417	0	2020-03-28	9	17	0		F	0	66	25	26	26	0	0	1	0	0		3.Severe	3	0	0	1			censored	1	1	0	1	0	0	0	0	0	0	0	0	0	0		2020-04-14	0	0	0	0
992	0	Center_05	418	1	2020-03-06	13	28	0		F	0	75	1	1	2	1	0	1	0	0		3.Severe	3	0	0	1			censored	1	0	0	0	0	1	0	0	0	0	0	0	0	0		2020-04-03	0	0	0	0
993	0	Center_05	418	0	2020-03-06	14	28	0		F	0	75	3	3	4	1	0	1	0	0		3.Severe	3	0	0	1			censored	1	0	0	0	0	1	0	0	0	0	0	0	0	0		2020-04-03	0	0	0	0
994	0	Center_05	418	0	2020-03-06	17	28	0		F	0	75	4	4	4	1	0	1	0	0		3.Severe	3	0	0	1			censored	1	0	0	0	0	1	0	0	0	0	0	0	0	0		2020-04-03	0	0	0	0
995	0	Center_05	418	0	2020-03-06	18	28	0		F	0	75	5	5	6	1	0	1	0	0		3.Severe	3	0	0	1			censored	1	0	0	0	0	1	0	0	0	0	0	0	0	0		2020-04-03	0	0	0	0
996	0	Center_05	418	0	2020-03-06	19	28	0		F	0	75	6	6	6	1	0	1	0	0		3.Severe	3	0	0	1			censored	1	0	0	0	0	1	0	0	0	0	0	0	0	0		2020-04-03	0	0	0	0
997	0	Center_05	418	0	2020-03-06	21	28	0		F	0	75	8	8	8	0	0	1	0	0		3.Severe	3	0	0	1			censored	1	0	0	0	0	1	0	0	0	0	0	0	0	0		2020-04-03	0	0	0	0
998	0	Center_05	418	0	2020-03-06	24	28	0		F	0	75	11	11	12	0	0	1	0	0		3.Severe	3	0	0	1			censored	1	0	0	0	0	1	0	0	0	0	0	0	0	0		2020-04-03	0	0	0	0
999	0	Center_05	418	0	2020-03-06	26	28	0		F	0	75	12	12	12	0	0	1	0	0		3.Severe	3	0	0	1			censored	1	0	0	0	0	1	0	0	0	0	0	0	0	0		2020-04-03	0	0	0	0
1000	0	Center_05	419	1	2020-04-03	0	5	1		M	1	76	14	14	14	0	0	1	0	0		2.Moderate	2	0	0	0			censored	1	1	0	1	0	0	0	0	0	0	0	0	0	0		2020-04-08	0	0	0	0
1001	0	Center_05	419	0	2020-04-03	2	5	1		M	1	76	16	16	16	0	0	1	0	0		2.Moderate	2	0	0	0			censored	1	1	0	1	0	0	0	0	0	0	0	0	0	0		2020-04-08	0	0	0	0
1002	0	Center_05	419	0	2020-04-03	3	5	1		M	1	76	17	18	18	0	0	1	0	0		2.Moderate	2	0	0	0			censored	1	1	0	1	0	0	0	0	0	0	0	0	0	0		2020-04-08	0	0	0	0
1003	0	Center_05	420	1	2020-04-02	0	30	1		F	0	71	11	11	12	0	0	0	1	1		4.Critical/Fatal	5	1	1	1				0	0	0	0	0	0	0	0	0	0	0	0	0	0			1	1	1	1
1004	0	Center_05	420	0	2020-04-02	1	30	1		F	0	71	11	11	12	0	0	0	1	1		4.Critical/Fatal	5	1	1	1				0	0	0	0	0	0	0	0	0	0	0	0	0	0			1	1	1	1
1005	0	Center_05	421	1	2020-03-18	0	30	1		M	1	85	14	14	14	0	0	0	1	1		4.Critical/Fatal	5	1	1	1				0	0	0	0	0	0	0	0	0	0	0	0	0	0			1	1	1	1
1006	0	Center_05	421	0	2020-03-18	0	30	1		M	1	85	14	14	14	0	0	0	1	1		4.Critical/Fatal	5	1	1	1				0	0	0	0	0	0	0	0	0	0	0	0	0	0			1	1	1	1
1007	0	Center_05	422	1	2020-04-04	0	4	1		M	1	87	5	5	6	1	0	1	0	0		4.Critical/Fatal	5	1	1	1				0	0	0	0	0	0	0	0	0	0	0	0	0	0			2020-04-08	1	1	1
1008	0	Center_05	422	0	2020-04-04	1	4	1		M	1	87	6	6	6	1	0	1	0	0		4.Critical/Fatal	5	1	1	1				0	0	0	0	0	0	0	0	0	0	0	0	0	0			2020-04-08	1	1	1
1009	0	Center_05	422	0	2020-04-04	2	4	1		M	1	87	7	7	8	1	0	1	0	0		4.Critical/Fatal	5	1	1	1				0	0	0	0	0	0	0	0	0	0	0	0	0	0			2020-04-08	1	1	1
1010	0	Center_05	423	1	2020-03-20	0	11	1		M	1	79	7	7	8	1	0	0	1	1		4.Critical/Fatal	5	1	1	1			censored	1	0	0	0	1	0	0	0	0	0	0	0	0	0			2020-03-31	1	1	1
1011	0	Center_05	423	0	2020-03-20	2	11	1		M	1	79	9	9	10	0	0	0	1	1		4.Critical/Fatal	5	1	1	1			censored	1	0	0	0	1	0	0	0	0	0	0	0	0	0			2020-03-31	1	1	1
1012	0	Center_05	423	0	2020-03-20	4	11	1		M	1	79	11	11	12	0	0	0	1	1		4.Critical/Fatal	5	1	1	1			censored	1	0	0	0	1	0	0	0	0	0	0	0	0	0			2020-03-31	1	1	1
1013	0	Center_05	424	1	2020-03-25	0	14	1		M	1	75	12	12	12	0	0	1	0	0		3.Severe	3	0	0	1			censored	1	1	0	0	0	0	0	0	0	0	0	0	0	0		2020-04-08	0	0	0	0
1014	0	Center_05	424	0	2020-03-25	1	14	1		M	1	75	13	13	14	0	0	1	0	0		3.Severe	3	0	0	1			censored	1	1	0	0	0	0	0	0	0	0	0	0	0	0		2020-04-08	0	0	0	0
1015	0	Center_05	424	0	2020-03-25	5	14	1		M	1	75	17	18	18	0	0	1	0	0		3.Severe	3	0	0	1			censored	1	1	0	0	0	0	0	0	0	0	0	0	0	0		2020-04-08	0	0	0	0
1016	0	Center_05	424	0	2020-03-25	7	14	1		M	1	75	19	20	20	0	0	1	0	0		3.Severe	3	0	0	1			censored	1	1	0	0	0	0	0	0	0	0	0	0	0	0		2020-04-08	0	0	0	0
1017	0	Center_05	425	1	2020-03-23	12	13	0		M	1	67	12	12	12	0	0	0	1	1		4.Critical/Fatal	5	1	1	1			censored	1	1	0	0	0	0	0	0	0	0	0	0	1	0			2020-04-05	1	1	1
1018	0	Center_05	426	1	2020-03-16	0	11	1		M	1	84	5	5	6	1	0	1	0	0		4.Critical/Fatal	5	1	1	1				0	0	0	0	0	0	0	0	0	0	0	0	0	0			2020-03-27	1	1	1
1019	0	Center_05	427	1	2020-03-31	0	30	1		M	1	53	13	13	14	0	0	0	1	1		4.Critical/Fatal	4	1	1	1			censored	1	0	0	0	1	0	0	0	0	0	0	0	0	0		2020-05-01	0	0	1	1
1020	0	Center_05	427	0	2020-03-31	1	30	1		M	1	53	14	14	14	0	0	0	1	1		4.Critical/Fatal	4	1	1	1			censored	1	0	0	0	1	0	0	0	0	0	0	0	0	0		2020-05-01	0	0	1	1
1021	0	Center_05	428	1	2020-04-01	0	9	1		M	1	48	6	6	6	1	0	1	0	0		3.Severe	3	0	0	1			censored	1	1	0	0	0	0	0	0	0	0	0	0	0	0		2020-04-10	0	0	0	0
1022	0	Center_05	428	0	2020-04-01	3	9	1		M	1	48	9	9	10	0	0	1	0	0		3.Severe	3	0	0	1			censored	1	1	0	0	0	0	0	0	0	0	0	0	0	0		2020-04-10	0	0	0	0
1023	0	Center_05	428	0	2020-04-01	4	9	1		M	1	48	10	10	10	0	0	1	0	0		3.Severe	3	0	0	1			censored	1	1	0	0	0	0	0	0	0	0	0	0	0	0		2020-04-10	0	0	0	0
1024	0	Center_05	428	0	2020-04-01	6	9	1		M	1	48	12	12	12	0	0	1	0	0		3.Severe	3	0	0	1			censored	1	1	0	0	0	0	0	0	0	0	0	0	0	0		2020-04-10	0	0	0	0
1025	0	Center_05	429	1	2020-03-26	0	13	1		F	0	77	11	11	12	0	0	1	0	0		4.Critical/Fatal	5	1	1	1			censored	1	1	0	0	0	1	0	0	0	0	0	0	0	0			2020-04-08	1	1	1
1026	0	Center_05	429	0	2020-03-26	1	13	1		F	0	77	12	12	12	0	0	1	0	0		4.Critical/Fatal	5	1	1	1			censored	1	1	0	0	0	1	0	0	0	0	0	0	0	0			2020-04-08	1	1	1
1027	0	Center_05	429	0	2020-03-26	2	13	1		F	0	77	13	13	14	0	0	1	0	0		4.Critical/Fatal	5	1	1	1			censored	1	1	0	0	0	1	0	0	0	0	0	0	0	0			2020-04-08	1	1	1
1028	0	Center_05	429	0	2020-03-26	5	13	1		F	0	77	16	16	16	0	0	1	0	0		4.Critical/Fatal	5	1	1	1			censored	1	1	0	0	0	1	0	0	0	0	0	0	0	0			2020-04-08	1	1	1
1029	0	Center_05	429	0	2020-03-26	8	13	0		F	0	77	19	20	20	0	0	1	0	0		4.Critical/Fatal	5	1	1	1			censored	1	1	0	0	0	1	0	0	0	0	0	0	0	0			2020-04-08	1	1	1
1030	0	Center_05	429	0	2020-03-26	11	13	0		F	0	77	22	22	22	0	0	1	0	0		4.Critical/Fatal	5	1	1	1			censored	1	1	0	0	0	1	0	0	0	0	0	0	0	0			2020-04-08	1	1	1
1031	0	Center_05	430	1	2020-03-19	1	4	1		M	1	73	6	6	6	1	0	1	0	0		4.Critical/Fatal	5	1	1	1			censored	1	1	0	1	0	0	0	0	0	0	0	0	0	0			2020-03-23	1	1	1
1032	0	Center_05	431	1	2020-03-30	0	18	1		M	1	58	10	10	10	0	0	1	0	0		3.Severe	3	0	0	1			censored	1	0	0	0	0	0	0	0	0	0	0	0	1	0		2020-04-17	0	0	0	0
1033	0	Center_05	432	1	2020-03-24	0	4	1		M	1	71	4	4	4	1	0	1	0	0		2.Moderate	2	0	0	0				0	0	0	0	0	0	0	0	0	0	0	0	0	0		2020-03-28	0	0	0	0
1034	0	Center_05	432	0	2020-03-24	1	4	1		M	1	71	5	5	6	1	0	1	0	0		2.Moderate	2	0	0	0				0	0	0	0	0	0	0	0	0	0	0	0	0	0		2020-03-28	0	0	0	0
1035	0	Center_05	432	0	2020-03-24	3	4	1		M	1	71	7	7	8	1	0	1	0	0		2.Moderate	2	0	0	0				0	0	0	0	0	0	0	0	0	0	0	0	0	0		2020-03-28	0	0	0	0
1036	0	Center_05	433	1	2020-03-19	0	3	1		M	1	54	11	11	12	0	0	1	0	0		2.Moderate	2	0	0	0			censored	0	0	0	0	0	0	0	0	0	0	0	0	0	0		2020-03-22	0	0	0	0
1037	0	Center_05	433	0	2020-03-19	1	3	1		M	1	54	12	12	12	0	0	1	0	0		2.Moderate	2	0	0	0			censored	0	0	0	0	0	0	0	0	0	0	0	0	0	0		2020-03-22	0	0	0	0
1038	0	Center_05	433	0	2020-03-19	2	3	1		M	1	54	13	13	14	0	0	1	0	0		2.Moderate	2	0	0	0			censored	0	0	0	0	0	0	0	0	0	0	0	0	0	0		2020-03-22	0	0	0	0
1039	0	Center_05	434	1	2020-03-27	0	9	1		M	1	71	11	11	12	0	0	1	0	0		3.Severe	3	0	0	1			censored	1	1	0	1	0	0	0	0	0	0	0	0	0	0		2020-04-05	0	0	0	0
1040	0	Center_05	434	0	2020-03-27	1	9	1		M	1	71	12	12	12	0	0	1	0	0		3.Severe	3	0	0	1			censored	1	1	0	1	0	0	0	0	0	0	0	0	0	0		2020-04-05	0	0	0	0
1041	0	Center_05	434	0	2020-03-27	3	9	1		M	1	71	14	14	14	0	0	1	0	0		3.Severe	3	0	0	1			censored	1	1	0	1	0	0	0	0	0	0	0	0	0	0		2020-04-05	0	0	0	0
1042	0	Center_05	434	0	2020-03-27	5	9	1		M	1	71	16	16	16	0	0	1	0	0		3.Severe	3	0	0	1			censored	1	1	0	1	0	0	0	0	0	0	0	0	0	0		2020-04-05	0	0	0	0
1043	0	Center_05	434	0	2020-03-27	7	9	1		M	1	71	18	18	18	0	0	1	0	0		3.Severe	3	0	0	1			censored	1	1	0	1	0	0	0	0	0	0	0	0	0	0		2020-04-05	0	0	0	0
1044	0	Center_05	435	1	2020-03-12	8	12	0		M	1	74	11	11	12	0	0	1	0	0		3.Severe	3	0	0	1			censored	1	1	0	0	0	1	0	0	0	0	0	0	0	0		2020-03-24	0	0	0	0
1045	0	Center_05	435	0	2020-03-12	11	12	0		M	1	74	14	14	14	0	0	1	0	0		3.Severe	3	0	0	1			censored	1	1	0	0	0	1	0	0	0	0	0	0	0	0		2020-03-24	0	0	0	0
1046	0	Center_05	436	1	2020-04-01	0	12	1		M	1	57	7	7	8	1	0	0	1	1		4.Critical/Fatal	5	1	1	1			censored	0	0	0	0	0	0	0	0	0	0	0	0	0	0			2020-04-13	1	1	1
1047	0	Center_05	437	1	2020-04-01	0	17	1		M	1	64	10	10	10	0	0	0	1	1		4.Critical/Fatal	4	1	1	1			censored	1	0	0	0	0	1	0	0	0	0	0	0	0	0		2020-04-18	0	0	1	1
1048	0	Center_05	437	0	2020-04-01	2	17	1		M	1	64	12	12	12	0	0	0	1	1		4.Critical/Fatal	4	1	1	1			censored	1	0	0	0	0	1	0	0	0	0	0	0	0	0		2020-04-18	0	0	1	1
1049	0	Center_05	438	1	2020-04-02	0	4	1		F	0	74	12	12	12	0	0	1	0	0		2.Moderate	2	0	0	0			censored	1	1	0	0	0	0	0	0	0	0	0	0	0	0		2020-04-06	0	0	0	0
1050	0	Center_05	438	0	2020-04-02	2	4	1		F	0	74	14	14	14	0	0	1	0	0		2.Moderate	2	0	0	0			censored	1	1	0	0	0	0	0	0	0	0	0	0	0	0		2020-04-06	0	0	0	0
1051	0	Center_05	438	0	2020-04-02	4	4	1		F	0	74	16	16	16	0	0	1	0	0		2.Moderate	2	0	0	0			censored	1	1	0	0	0	0	0	0	0	0	0	0	0	0		2020-04-06	0	0	0	0
1052	0	Center_05	439	1	2020-04-01	0	3	1		F	0	82	7	7	8	1	0	1	0	0		4.Critical/Fatal	5	1	1	1				0	0	0	0	0	0	0	0	0	0	0	0	0	0			2020-04-04	1	1	1
1053	0	Center_05	439	0	2020-04-01	2	3	1		F	0	82	9	9	10	0	0	1	0	0		4.Critical/Fatal	5	1	1	1				0	0	0	0	0	0	0	0	0	0	0	0	0	0			2020-04-04	1	1	1
1054	0	Center_05	440	1	2020-04-02	2	8	1		F	0	74	4	4	4	1	0	1	0	0		3.Severe	3	0	0	1				0	0	0	0	0	0	0	0	0	0	0	0	0	0		2020-04-10	0	0	0	0
1055	0	Center_05	441	1	2020-04-03	0	9	1		F	0	89	12	12	12	0	0	1	0	0		3.Severe	3	0	0	1			censored	1	1	0	0	0	0	0	0	0	0	0	0	0	0		2020-04-12	0	0	0	0
1056	0	Center_05	441	0	2020-04-03	1	9	1		F	0	89	13	13	14	0	0	1	0	0		3.Severe	3	0	0	1			censored	1	1	0	0	0	0	0	0	0	0	0	0	0	0		2020-04-12	0	0	0	0
1057	0	Center_05	441	0	2020-04-03	3	9	1		F	0	89	15	16	16	0	0	1	0	0		3.Severe	3	0	0	1			censored	1	1	0	0	0	0	0	0	0	0	0	0	0	0		2020-04-12	0	0	0	0
1058	0	Center_05	442	1	2020-03-17	0	7	1		F	0	74	7	7	8	1	0	1	0	0		4.Critical/Fatal	5	1	1	1				0	0	0	0	0	0	0	0	0	0	0	0	0	0			2020-03-24	1	1	1
1059	0	Center_05	442	0	2020-03-17	1	7	1		F	0	74	8	8	8	0	0	1	0	0		4.Critical/Fatal	5	1	1	1				0	0	0	0	0	0	0	0	0	0	0	0	0	0			2020-03-24	1	1	1
1060	0	Center_05	442	0	2020-03-17	2	7	1		F	0	74	9	9	10	0	0	1	0	0		4.Critical/Fatal	5	1	1	1				0	0	0	0	0	0	0	0	0	0	0	0	0	0			2020-03-24	1	1	1
1061	0	Center_05	442	0	2020-03-17	3	7	1		F	0	74	10	10	10	0	0	1	0	0		4.Critical/Fatal	5	1	1	1				0	0	0	0	0	0	0	0	0	0	0	0	0	0			2020-03-24	1	1	1
1062	0	Center_05	442	0	2020-03-17	6	7	1		F	0	74	13	13	14	0	0	1	0	0		4.Critical/Fatal	5	1	1	1				0	0	0	0	0	0	0	0	0	0	0	0	0	0			2020-03-24	1	1	1
1063	0	Center_05	443	1	2020-03-21	0	31	1		M	1	57	6	6	6	1	0	0	1	1		4.Critical/Fatal	4	1	1	1				0	0	0	0	0	0	0	0	0	0	0	0	0	0		2020-04-21	0	0	1	1
1064	0	Center_05	443	0	2020-03-21	2	31	1		M	1	57	8	8	8	0	0	0	1	1		4.Critical/Fatal	4	1	1	1				0	0	0	0	0	0	0	0	0	0	0	0	0	0		2020-04-21	0	0	1	1
1065	0	Center_05	443	0	2020-03-21	4	31	1		M	1	57	10	10	10	0	0	0	1	1		4.Critical/Fatal	4	1	1	1				0	0	0	0	0	0	0	0	0	0	0	0	0	0		2020-04-21	0	0	1	1
1066	0	Center_05	443	0	2020-03-21	5	31	1		M	1	57	11	11	12	0	0	0	1	1		4.Critical/Fatal	4	1	1	1				0	0	0	0	0	0	0	0	0	0	0	0	0	0		2020-04-21	0	0	1	1
1067	0	Center_05	444	1	2020-03-20	0	shift	1		F	0	54	10	10	10	0	0	0	1	1		4.Critical/Fatal	4	1	1	1			censored	1	0	0	0	0	1	0	0	0	0	0	0	0	0		2020-03-21	0	0	1	1
1068	0	Center_05	444	0	2020-03-20	1	shift	1		F	0	54	11	11	12	0	0	0	1	1		4.Critical/Fatal	4	1	1	1			censored	1	0	0	0	0	1	0	0	0	0	0	0	0	0		2020-03-21	0	0	1	1
1069	0	Center_05	445	1	2020-03-24	0	14	1		M	1	81	4	4	4	1	0	1	0	0		3.Severe	3	0	0	1			censored	1	1	0	0	0	0	0	0	0	0	0	0	0	0		2020-04-07	0	0	0	0
1070	0	Center_05	445	0	2020-03-24	1	14	1		M	1	81	5	5	6	1	0	1	0	0		3.Severe	3	0	0	1			censored	1	1	0	0	0	0	0	0	0	0	0	0	0	0		2020-04-07	0	0	0	0
1071	0	Center_05	445	0	2020-03-24	6	14	1		M	1	81	10	10	10	0	0	1	0	0		3.Severe	3	0	0	1			censored	1	1	0	0	0	0	0	0	0	0	0	0	0	0		2020-04-07	0	0	0	0
1072	0	Center_05	445	0	2020-03-24	8	14	0		M	1	81	12	12	12	0	0	1	0	0		3.Severe	3	0	0	1			censored	1	1	0	0	0	0	0	0	0	0	0	0	0	0		2020-04-07	0	0	0	0
1073	0	Center_05	445	0	2020-03-24	10	14	0		M	1	81	14	14	14	0	0	1	0	0		3.Severe	3	0	0	1			censored	1	1	0	0	0	0	0	0	0	0	0	0	0	0		2020-04-07	0	0	0	0
1074	0	Center_05	445	0	2020-03-24	13	14	0		M	1	81	17	18	18	0	0	1	0	0		3.Severe	3	0	0	1			censored	1	1	0	0	0	0	0	0	0	0	0	0	0	0		2020-04-07	0	0	0	0
1075	0	Center_05	446	1	2020-03-12	2	22	1		M	1	81	12	12	12	0	0	1	0	0		4.Critical/Fatal	5	1	1	1				0	0	0	0	0	0	0	0	0	0	0	0	0	0			2020-04-03	1	1	1
1076	0	Center_05	446	0	2020-03-12	6	22	1		M	1	81	16	16	16	0	0	1	0	0		4.Critical/Fatal	5	1	1	1				0	0	0	0	0	0	0	0	0	0	0	0	0	0			2020-04-03	1	1	1
1077	0	Center_05	446	0	2020-03-12	8	22	0		M	1	81	18	18	18	0	0	1	0	0		4.Critical/Fatal	5	1	1	1				0	0	0	0	0	0	0	0	0	0	0	0	0	0			2020-04-03	1	1	1
1078	0	Center_05	446	0	2020-03-12	11	22	0		M	1	81	21	22	22	0	0	1	0	0		4.Critical/Fatal	5	1	1	1				0	0	0	0	0	0	0	0	0	0	0	0	0	0			2020-04-03	1	1	1
1079	0	Center_05	446	0	2020-03-12	18	22	0		M	1	81	28	28	28	0	0	1	0	0		4.Critical/Fatal	5	1	1	1				0	0	0	0	0	0	0	0	0	0	0	0	0	0			2020-04-03	1	1	1
1080	0	Center_05	446	0	2020-03-12	20	22	0		M	1	81	30	29-46	29-46		0	1	0	0		4.Critical/Fatal	5	1	1	1				0	0	0	0	0	0	0	0	0	0	0	0	0	0			2020-04-03	1	1	1
1081	0	Center_05	447	1	2020-03-17	1	14	1		F	0	86	5	5	6	1	0	1	0	0		3.Severe	3	0	0	1			censored	1	0	0	0	1	0	0	0	0	0	0	0	0	0		2020-03-31	0	0	0	0
1082	0	Center_05	447	0	2020-03-17	3	14	1		F	0	86	7	7	8	1	0	1	0	0		3.Severe	3	0	0	1			censored	1	0	0	0	1	0	0	0	0	0	0	0	0	0		2020-03-31	0	0	0	0
1083	0	Center_05	447	0	2020-03-17	6	14	1		F	0	86	10	10	10	0	0	1	0	0		3.Severe	3	0	0	1			censored	1	0	0	0	1	0	0	0	0	0	0	0	0	0		2020-03-31	0	0	0	0
1084	0	Center_05	447	0	2020-03-17	8	14	0		F	0	86	12	12	12	0	0	1	0	0		3.Severe	3	0	0	1			censored	1	0	0	0	1	0	0	0	0	0	0	0	0	0		2020-03-31	0	0	0	0
1085	0	Center_05	447	0	2020-03-17	10	14	0		F	0	86	14	14	14	0	0	1	0	0		3.Severe	3	0	0	1			censored	1	0	0	0	1	0	0	0	0	0	0	0	0	0		2020-03-31	0	0	0	0
1086	0	Center_05	447	0	2020-03-17	13	14	0		F	0	86	17	18	18	0	0	1	0	0		3.Severe	3	0	0	1			censored	1	0	0	0	1	0	0	0	0	0	0	0	0	0		2020-03-31	0	0	0	0
1087	0	Center_05	448	1	2020-04-02	0	3	1		M	1	55	9	9	10	0	0	1	0	0		2.Moderate	2	0	0	0			censored	0	0	0	0	0	0	0	0	0	0	0	0	0	0		2020-04-05	0	0	0	0
1088	0	Center_05	448	0	2020-04-02	2	3	1		M	1	55	11	11	12	0	0	1	0	0		2.Moderate	2	0	0	0			censored	0	0	0	0	0	0	0	0	0	0	0	0	0	0		2020-04-05	0	0	0	0
1089	0	Center_05	449	1	2020-03-26	0	8	1		M	1	52	9	9	10	0	0	1	0	0		3.Severe	3	0	0	1			censored	0	0	0	0	0	0	0	0	0	0	0	0	0	0		2020-04-03	0	0	0	0
1090	0	Center_05	449	0	2020-03-26	1	8	1		M	1	52	10	10	10	0	0	1	0	0		3.Severe	3	0	0	1			censored	0	0	0	0	0	0	0	0	0	0	0	0	0	0		2020-04-03	0	0	0	0
1091	0	Center_05	449	0	2020-03-26	4	8	1		M	1	52	13	13	14	0	0	1	0	0		3.Severe	3	0	0	1			censored	0	0	0	0	0	0	0	0	0	0	0	0	0	0		2020-04-03	0	0	0	0
1092	0	Center_05	449	0	2020-03-26	6	8	1		M	1	52	15	16	16	0	0	1	0	0		3.Severe	3	0	0	1			censored	0	0	0	0	0	0	0	0	0	0	0	0	0	0		2020-04-03	0	0	0	0
1093	0	Center_05	449	0	2020-03-26	8	8	0		M	1	52	17	18	18	0	0	1	0	0		3.Severe	3	0	0	1			censored	0	0	0	0	0	0	0	0	0	0	0	0	0	0		2020-04-03	0	0	0	0
1094	0	Center_05	450	1	2020-04-01	0	14	1		F	0	83	5	5	6	1	0	1	0	0		3.Severe	3	0	0	1			censored	1	0	0	0	0	0	0	1	0	0	0	0	0	0		2020-04-15	0	0	0	0
1095	0	Center_05	450	0	2020-04-01	2	14	1		F	0	83	7	7	8	1	0	1	0	0		3.Severe	3	0	0	1			censored	1	0	0	0	0	0	0	1	0	0	0	0	0	0		2020-04-15	0	0	0	0
1096	0	Center_05	450	0	2020-04-01	3	14	1		F	0	83	8	8	8	0	0	1	0	0		3.Severe	3	0	0	1			censored	1	0	0	0	0	0	0	1	0	0	0	0	0	0		2020-04-15	0	0	0	0
1097	0	Center_05	450	0	2020-04-01	5	14	1		F	0	83	10	10	10	0	0	1	0	0		3.Severe	3	0	0	1			censored	1	0	0	0	0	0	0	1	0	0	0	0	0	0		2020-04-15	0	0	0	0
1098	0	Center_05	451	1	2020-03-22	0	2	1		F	0	75	13	13	14	0	0	1	0	0		2.Moderate	2	0	0	0				0	0	0	0	0	0	0	0	0	0	0	0	0	0		2020-03-24	0	0	0	0
1099	0	Center_05	452	1	2020-03-16	0	16	1		M	1	43	7	7	8	1	0	0	1	1		4.Critical/Fatal	5	1	1	1			censored	0	0	0	0	0	0	0	0	0	0	0	0	0	0			2020-04-01	1	1	1
1100	0	Center_05	453	1	2020-03-19	0	9	1		M	1	78	12	12	12	0	0	1	0	0		4.Critical/Fatal	5	1	1	1			censored	1	1	0	0	0	0	0	0	0	0	0	0	0	0			2020-03-28	1	1	1
1101	0	Center_05	453	0	2020-03-19	4	9	1		M	1	78	16	16	16	0	0	1	0	0		4.Critical/Fatal	5	1	1	1			censored	1	1	0	0	0	0	0	0	0	0	0	0	0	0			2020-03-28	1	1	1
1102	0	Center_05	453	0	2020-03-19	6	9	1		M	1	78	18	18	18	0	0	1	0	0		4.Critical/Fatal	5	1	1	1			censored	1	1	0	0	0	0	0	0	0	0	0	0	0	0			2020-03-28	1	1	1
1103	0	Center_05	453	0	2020-03-19	8	9	0		M	1	78	20	20	20	0	0	1	0	0		4.Critical/Fatal	5	1	1	1			censored	1	1	0	0	0	0	0	0	0	0	0	0	0	0			2020-03-28	1	1	1
1104	0	Center_05	454	1	2020-03-27	7	30	1		M	1	63	14	14	14	0	0	1	0	0		3.Severe	3	0	0	1				0	0	0	0	0	0	0	0	0	0	0	0	0	0		2020-05-01	0	0	0	0
1105	0	Center_05	454	0	2020-03-27	10	30	0		M	1	63	17	18	18	0	0	1	0	0		3.Severe	3	0	0	1				0	0	0	0	0	0	0	0	0	0	0	0	0	0		2020-05-01	0	0	0	0
1106	0	Center_05	455	1	2020-03-23	0	6	1		F	0	56	7	7	8	1	0	1	0	0		4.Critical/Fatal	5	1	1	1			censored	1	0	0	0	0	0	0	1	0	0	0	0	0	0			2020-03-29	1	1	1
1107	0	Center_05	455	0	2020-03-23	2	6	1		F	0	56	9	9	10	0	0	1	0	0		4.Critical/Fatal	5	1	1	1			censored	1	0	0	0	0	0	0	1	0	0	0	0	0	0			2020-03-29	1	1	1
1108	0	Center_05	455	0	2020-03-23	4	6	1		F	0	56	11	11	12	0	0	1	0	0		4.Critical/Fatal	5	1	1	1			censored	1	0	0	0	0	0	0	1	0	0	0	0	0	0			2020-03-29	1	1	1
1109	0	Center_05	456	1	2020-03-16	0	6	1		M	1	85	3	3	4	1	0	1	0	0		3.Severe	3	0	0	1			censored	1	0	0	0	1	0	0	0	0	0	0	0	0	0		2020-03-22	0	0	0	0
1110	0	Center_05	456	0	2020-03-16	4	6	1		M	1	85	7	7	8	1	0	1	0	0		3.Severe	3	0	0	1			censored	1	0	0	0	1	0	0	0	0	0	0	0	0	0		2020-03-22	0	0	0	0
1111	0	Center_05	457	1	2020-03-15	1	13	1		M	1	64	14	14	14	0	0	1	0	0		3.Severe	3	0	0	1			censored	1	1	0	0	0	0	0	0	0	0	0	0	0	0		2020-03-28	0	0	0	0
1112	0	Center_05	457	0	2020-03-15	3	13	1		M	1	64	16	16	16	0	0	1	0	0		3.Severe	3	0	0	1			censored	1	1	0	0	0	0	0	0	0	0	0	0	0	0		2020-03-28	0	0	0	0
1113	0	Center_05	457	0	2020-03-15	5	13	1		M	1	64	18	18	18	0	0	1	0	0		3.Severe	3	0	0	1			censored	1	1	0	0	0	0	0	0	0	0	0	0	0	0		2020-03-28	0	0	0	0
1114	0	Center_05	457	0	2020-03-15	8	13	0		M	1	64	21	22	22	0	0	1	0	0		3.Severe	3	0	0	1			censored	1	1	0	0	0	0	0	0	0	0	0	0	0	0		2020-03-28	0	0	0	0
1115	0	Center_05	457	0	2020-03-15	10	13	0		M	1	64	23	24	24	0	0	1	0	0		3.Severe	3	0	0	1			censored	1	1	0	0	0	0	0	0	0	0	0	0	0	0		2020-03-28	0	0	0	0
1116	0	Center_05	457	0	2020-03-15	12	13	0		M	1	64	25	26	26	0	0	1	0	0		3.Severe	3	0	0	1			censored	1	1	0	0	0	0	0	0	0	0	0	0	0	0		2020-03-28	0	0	0	0
1117	0	Center_05	458	1	2020-03-23	0	2	1		F	0	78	7	7	8	1	0	1	0	0		2.Moderate	2	0	0	0			censored	1	0	0	1	0	0	0	0	0	0	0	0	0	0		2020-03-25	0	0	0	0
1118	0	Center_05	458	0	2020-03-23	1	2	1		F	0	78	8	8	8	0	0	1	0	0		2.Moderate	2	0	0	0			censored	1	0	0	1	0	0	0	0	0	0	0	0	0	0		2020-03-25	0	0	0	0
1119	0	Center_05	459	1	2020-03-19	0	4	1		M	1	75	11	11	12	0	0	0	1	1		4.Critical/Fatal	5	1	1	1				0	0	0	0	0	0	0	0	0	0	0	0	0	0			2020-03-23	1	1	1
1120	0	Center_05	460	1	2020-03-18	0	3	1		M	1	73	5	5	6	1	0	0	1	1		4.Critical/Fatal	5	1	1	1			censored	1	1	0	0	0	0	0	0	0	0	0	0	0	0			2020-03-21	1	1	1
1121	0	Center_05	460	0	2020-03-18	2	3	1		M	1	73	7	7	8	1	0	0	1	1		4.Critical/Fatal	5	1	1	1			censored	1	1	0	0	0	0	0	0	0	0	0	0	0	0			2020-03-21	1	1	1
1122	0	Center_05	461	1	2020-04-03	0	7	1		M	1	70	4	4	4	1	0	1	0	0		3.Severe	3	0	0	1			censored	1	0	0	0	0	1	0	0	0	0	0	0	0	0		2020-04-10	0	0	0	0
1123	0	Center_05	461	0	2020-04-03	3	7	1		M	1	70	7	7	8	1	0	1	0	0		3.Severe	3	0	0	1			censored	1	0	0	0	0	1	0	0	0	0	0	0	0	0		2020-04-10	0	0	0	0
1124	0	Center_05	462	1	2020-03-19	1	1	1		M	1	71	16	16	16	0	0	1	0	0		2.Moderate	2	0	0	0			censored	1	1	0	1	0	0	0	0	0	0	0	0	0	0		2020-03-20	0	0	0	0
1125	0	Center_05	463	1	2020-03-19	0	13	1		M	1	76	12	12	12	0	0	0	1	1		4.Critical/Fatal	5	1	1	1			censored	1	1	0	1	1	0	0	0	0	0	0	0	0	0			2020-04-01	1	1	1
1126	0	Center_05	464	1	2020-03-31	0	30	1		F	0	48	10	10	10	0	0	1	0	0		3.Severe	3	0	0	1			censored	1	0	0	0	0	1	0	0	0	0	0	0	0	0		2020-05-01	0	0	0	0
1127	0	Center_05	464	0	2020-03-31	1	30	1		F	0	48	11	11	12	0	0	1	0	0		3.Severe	3	0	0	1			censored	1	0	0	0	0	1	0	0	0	0	0	0	0	0		2020-05-01	0	0	0	0
1128	0	Center_05	464	0	2020-03-31	3	30	1		F	0	48	13	13	14	0	0	1	0	0		3.Severe	3	0	0	1			censored	1	0	0	0	0	1	0	0	0	0	0	0	0	0		2020-05-01	0	0	0	0
1129	0	Center_05	465	1	2020-04-03	0	3	1		F	0	78	18	18	18	0	0	1	0	0		2.Moderate	2	0	0	0			censored	1	0	0	1	0	0	0	0	0	0	0	0	0	0		2020-04-06	0	0	0	0
1130	0	Center_05	465	0	2020-04-03	3	3	1		F	0	78	21	22	22	0	0	1	0	0		2.Moderate	2	0	0	0			censored	1	0	0	1	0	0	0	0	0	0	0	0	0	0		2020-04-06	0	0	0	0
1131	0	Center_05	466	1	2020-03-21	0	2	1		M	1	77	11	11	12	0	0	1	0	0		2.Moderate	2	0	0	0			censored	1	0	0	0	1	0	0	0	0	0	0	0	0	0		2020-03-23	0	0	0	0
1132	0	Center_05	467	1	2020-03-30	0	1	1		F	0	64	9	9	10	0	0	1	0	0		2.Moderate	2	0	0	0				0	0	0	0	0	0	0	0	0	0	0	0	0	0		2020-03-30	0	0	0	0
1133	0	Center_05	468	1	2020-03-20	0	2	1		M	1	74	9	9	10	0	0	0	1	1		4.Critical/Fatal	4	1	1	1			censored	1	0	0	0	0	1	0	0	0	0	0	0	0	0		2020-03-22	0	0	1	1
1134	0	Center_05	468	0	2020-03-20	1	2	1		M	1	74	10	10	10	0	0	0	1	1		4.Critical/Fatal	4	1	1	1			censored	1	0	0	0	0	1	0	0	0	0	0	0	0	0		2020-03-22	0	0	1	1
1135	0	Center_05	469	1	2020-03-21	0	1	1		M	1	69	7	7	8	1	0	1	0	0		2.Moderate	2	0	0	0			censored	0	0	0	0	0	0	0	0	0	0	0	0	0	0		2020-03-22	0	0	0	0
1136	0	Center_05	469	0	2020-03-21	1	1	1		M	1	69	8	8	8	0	0	1	0	0		2.Moderate	2	0	0	0			censored	0	0	0	0	0	0	0	0	0	0	0	0	0	0		2020-03-22	0	0	0	0
1137	0	Center_05	470	1	2020-03-17	0	0	1		M	1	79	2	2	2	1	1	0	0	1		1.Mild	1	0	0	0				0	0	0	0	0	0	0	0	0	0	0	0	0	0		1	0	0	0	0
1138	0	Center_05	471	1	2020-04-02	0	8	1		M	1	78	7	7	8	1	0	1	0	0		3.Severe	3	0	0	1			censored	0	0	0	0	0	0	0	0	0	0	0	0	0	0		2020-04-10	0	0	0	0
1139	0	Center_05	471	0	2020-04-02	1	8	1		M	1	78	8	8	8	0	0	1	0	0		3.Severe	3	0	0	1			censored	0	0	0	0	0	0	0	0	0	0	0	0	0	0		2020-04-10	0	0	0	0
1140	0	Center_05	471	0	2020-04-02	4	8	1		M	1	78	11	11	12	0	0	1	0	0		3.Severe	3	0	0	1			censored	0	0	0	0	0	0	0	0	0	0	0	0	0	0		2020-04-10	0	0	0	0
1141	0	Center_05	472	1	2020-03-21	0	14	1		M	1	73	14	14	14	0	0	0	1	1		4.Critical/Fatal	5	1	1	1			censored	1	0	0	0	0	1	0	0	0	0	0	0	0	0			2020-04-04	1	1	1
1142	CBC is zero	Center_05	472	0	2020-03-21	6	14	1		M	1	73	20	20	20	0	0	0	1	1		4.Critical/Fatal	5	1	1	1			censored	1	0	0	0	0	1	0	0	0	0	0	0	0	0			2020-04-04	1	1	1
1143	0	Center_05	472	0	2020-03-21	11	14	0		M	1	73	24	24	24	0	0	0	1	1		4.Critical/Fatal	5	1	1	1			censored	1	0	0	0	0	1	0	0	0	0	0	0	0	0			2020-04-04	1	1	1
1144	0	Center_05	472	0	2020-03-21	13	14	0		M	1	73	26	26	26	0	0	0	1	1		4.Critical/Fatal	5	1	1	1			censored	1	0	0	0	0	1	0	0	0	0	0	0	0	0			2020-04-04	1	1	1
1145	0	Center_05	473	1	2020-03-31	0	17	1		M	1	84	12	12	12	0	0	0	1	1		4.Critical/Fatal	5	1	1	1				0	0	0	0	0	0	0	0	0	0	0	0	0	0			2020-04-17	1	1	1
1146	0	Center_05	473	0	2020-03-31	1	17	1		M	1	84	13	13	14	0	0	0	1	1		4.Critical/Fatal	5	1	1	1				0	0	0	0	0	0	0	0	0	0	0	0	0	0			2020-04-17	1	1	1
1147	0	Center_05	473	0	2020-03-31	3	17	1		M	1	84	15	16	16	0	0	0	1	1		4.Critical/Fatal	5	1	1	1				0	0	0	0	0	0	0	0	0	0	0	0	0	0			2020-04-17	1	1	1
1148	0	Center_05	474	1	2020-03-27	3	6	1		M	1	61	12	12	12	0	0	1	0	0		3.Severe	3	0	0	1			censored	1	1	0	0	0	0	0	0	0	0	0	0	0	0		2020-04-02	0	0	0	0
1149	0	Center_05	474	0	2020-03-27	5	6	1		M	1	61	14	14	14	0	0	1	0	0		3.Severe	3	0	0	1			censored	1	1	0	0	0	0	0	0	0	0	0	0	0	0		2020-04-02	0	0	0	0
1150	0	Center_05	475	1	2020-03-24	0	1	1		F	0	84	4	4	4	1	0	1	0	0		4.Critical/Fatal	5	1	1	1			censored	1	1	0	0	0	0	0	0	0	0	0	0	0	0			2020-03-25	1	1	1
1151	0	Center_05	476	1	2020-03-23	0	2	1		F	0	75	7	7	8	1	0	1	0	0		2.Moderate	2	0	0	0			censored	1	1	0	0	0	0	1	0	0	0	0	0	0	0		2020-03-25	0	0	0	0
1152	0	Center_05	476	0	2020-03-23	1	2	1		F	0	75	8	8	8	0	0	1	0	0		2.Moderate	2	0	0	0			censored	1	1	0	0	0	0	1	0	0	0	0	0	0	0		2020-03-25	0	0	0	0
1153	0	Center_05	477	1	2020-03-24	0	13	1		M	1	75	21	22	22	0	0	1	0	0		4.Critical/Fatal	5	1	1	1			censored	1	1	0	0	0	0	0	0	0	0	0	0	0	0			2020-04-06	1	1	1
1154	0	Center_05	477	0	2020-03-24	4	13	1		M	1	75	25	26	26	0	0	1	0	0		4.Critical/Fatal	5	1	1	1			censored	1	1	0	0	0	0	0	0	0	0	0	0	0	0			2020-04-06	1	1	1
1155	0	Center_05	477	0	2020-03-24	6	13	1		M	1	75	27	28	28	0	0	1	0	0		4.Critical/Fatal	5	1	1	1			censored	1	1	0	0	0	0	0	0	0	0	0	0	0	0			2020-04-06	1	1	1
1156	0	Center_05	477	0	2020-03-24	8	13	0		M	1	75	29	29-46	29-46		0	1	0	0		4.Critical/Fatal	5	1	1	1			censored	1	1	0	0	0	0	0	0	0	0	0	0	0	0			2020-04-06	1	1	1
1157	0	Center_05	477	0	2020-03-24	10	13	0		M	1	75	31	29-46	29-46		0	1	0	0		4.Critical/Fatal	5	1	1	1			censored	1	1	0	0	0	0	0	0	0	0	0	0	0	0			2020-04-06	1	1	1
1158	0	Center_05	478	1	2020-04-02	0	5	1		M	1	73	14	14	14	0	0	1	0	0		2.Moderate	2	0	0	0			censored	1	1	0	0	0	0	0	0	0	0	0	0	0	0		2020-04-07	0	0	0	0
1159	0	Center_05	478	0	2020-04-02	1	5	1		M	1	73	15	16	16	0	0	1	0	0		2.Moderate	2	0	0	0			censored	1	1	0	0	0	0	0	0	0	0	0	0	0	0		2020-04-07	0	0	0	0
1160	0	Center_05	478	0	2020-04-02	4	5	1		M	1	73	18	18	18	0	0	1	0	0		2.Moderate	2	0	0	0			censored	1	1	0	0	0	0	0	0	0	0	0	0	0	0		2020-04-07	0	0	0	0
1161	0	Center_05	479	1	2020-03-30	0	8	1		F	0	52	11	11	12	0	0	1	0	0		3.Severe	3	0	0	1			censored	0	0	0	0	0	0	0	0	0	0	0	0	0	0		2020-04-07	0	0	0	0
1162	0	Center_05	479	0	2020-03-30	2	8	1		F	0	52	13	13	14	0	0	1	0	0		3.Severe	3	0	0	1			censored	0	0	0	0	0	0	0	0	0	0	0	0	0	0		2020-04-07	0	0	0	0
1163	0	Center_05	479	0	2020-03-30	4	8	1		F	0	52	15	16	16	0	0	1	0	0		3.Severe	3	0	0	1			censored	0	0	0	0	0	0	0	0	0	0	0	0	0	0		2020-04-07	0	0	0	0
1164	0	Center_05	479	0	2020-03-30	7	8	1		F	0	52	18	18	18	0	0	1	0	0		3.Severe	3	0	0	1			censored	0	0	0	0	0	0	0	0	0	0	0	0	0	0		2020-04-07	0	0	0	0
1165	0	Center_05	480	1	2020-03-19	0	6	1		M	1	76	5	5	6	1	0	1	0	0		3.Severe	3	0	0	1			censored	1	1	0	0	0	0	1	0	0	0	0	0	1	0		2020-03-25	0	0	0	0
1166	0	Center_05	480	0	2020-03-19	1	6	1		M	1	76	6	6	6	1	0	1	0	0		3.Severe	3	0	0	1			censored	1	1	0	0	0	0	1	0	0	0	0	0	1	0		2020-03-25	0	0	0	0
1167	0	Center_05	480	0	2020-03-19	4	6	1		M	1	76	9	9	10	0	0	1	0	0		3.Severe	3	0	0	1			censored	1	1	0	0	0	0	1	0	0	0	0	0	1	0		2020-03-25	0	0	0	0
1168	0	Center_05	480	0	2020-03-19	6	6	1		M	1	76	11	11	12	0	0	1	0	0		3.Severe	3	0	0	1			censored	1	1	0	0	0	0	1	0	0	0	0	0	1	0		2020-03-25	0	0	0	0
1169	0	Center_05	481	1	2020-03-21	0	1	1		M	1	55	7	7	8	1	0	1	0	0		2.Moderate	2	0	0	0				0	0	0	0	0	0	0	0	0	0	0	0	0	0		2020-03-22	0	0	0	0
1170	0	Center_05	482	1	2020-03-25	0	1	1		F	0	66	6	6	6	1	0	1	0	0		2.Moderate	2	0	0	0				0	0	0	0	0	0	0	0	0	0	0	0	0	0		2020-03-26	0	0	0	0
1171	0	Center_05	483	1	2020-03-28	2	3	1		M	1	58	5	5	6	1	0	1	0	0		4.Critical/Fatal	5	1	1	1				0	0	0	0	0	0	0	0	0	0	0	0	0	0			2020-03-31	1	1	1
1172	0	Center_05	484	1	2020-03-24	0	2	1		M	1	72	2	2	2	1	0	1	0	0		2.Moderate	2	0	0	0			censored	0	0	0	0	0	0	0	0	0	0	0	0	0	0		2020-03-26	0	0	0	0
1173	0	Center_05	484	0	2020-03-24	1	2	1		M	1	72	3	3	4	1	0	1	0	0		2.Moderate	2	0	0	0			censored	0	0	0	0	0	0	0	0	0	0	0	0	0	0		2020-03-26	0	0	0	0
1174	0	Center_05	485	1	2020-03-25	0	10	1		F	0	80	11	11	12	0	0	1	0	0		3.Severe	3	0	0	1			censored	1	0	0	0	0	1	0	0	0	0	0	0	1	0		2020-04-04	0	0	0	0
1175	0	Center_05	485	0	2020-03-25	2	10	1		F	0	80	13	13	14	0	0	1	0	0		3.Severe	3	0	0	1			censored	1	0	0	0	0	1	0	0	0	0	0	0	1	0		2020-04-04	0	0	0	0
1176	0	Center_05	485	0	2020-03-25	5	10	1		F	0	80	16	16	16	0	0	1	0	0		3.Severe	3	0	0	1			censored	1	0	0	0	0	1	0	0	0	0	0	0	1	0		2020-04-04	0	0	0	0
1177	0	Center_05	485	0	2020-03-25	7	10	1		F	0	80	18	18	18	0	0	1	0	0		3.Severe	3	0	0	1			censored	1	0	0	0	0	1	0	0	0	0	0	0	1	0		2020-04-04	0	0	0	0
1178	0	Center_05	485	0	2020-03-25	9	10	0		F	0	80	20	20	20	0	0	1	0	0		3.Severe	3	0	0	1			censored	1	0	0	0	0	1	0	0	0	0	0	0	1	0		2020-04-04	0	0	0	0
1179	0	Center_05	486	1	2020-03-27	0	11	1		F	0	52	6	6	6	1	0	1	0	0		3.Severe	3	0	0	1			censored	0	0	0	0	0	0	0	0	0	0	0	0	0	0		2020-04-07	0	0	0	0
1180	0	Center_05	486	0	2020-03-27	3	11	1		F	0	52	9	9	10	0	0	1	0	0		3.Severe	3	0	0	1			censored	0	0	0	0	0	0	0	0	0	0	0	0	0	0		2020-04-07	0	0	0	0
1181	0	Center_05	487	1	2020-03-22	0	7	1		F	0	84	4	4	4	1	0	1	0	0		4.Critical/Fatal	5	1	1	1			censored	1	0	0	1	0	0	0	0	0	0	0	0	0	0			2020-03-29	1	1	1
1182	0	Center_05	487	0	2020-03-22	1	7	1		F	0	84	5	5	6	1	0	1	0	0		4.Critical/Fatal	5	1	1	1			censored	1	0	0	1	0	0	0	0	0	0	0	0	0	0			2020-03-29	1	1	1
1183	0	Center_05	487	0	2020-03-22	3	7	1		F	0	84	7	7	8	1	0	1	0	0		4.Critical/Fatal	5	1	1	1			censored	1	0	0	1	0	0	0	0	0	0	0	0	0	0			2020-03-29	1	1	1
1184	0	Center_05	487	0	2020-03-22	5	7	1		F	0	84	9	9	10	0	0	1	0	0		4.Critical/Fatal	5	1	1	1			censored	1	0	0	1	0	0	0	0	0	0	0	0	0	0			2020-03-29	1	1	1
1185	0	Center_05	488	1	2020-03-16	0	8	1		M	1	87	15	16	16	0	0	1	0	0		4.Critical/Fatal	5	1	1	1			censored	1	0	0	1	0	1	0	0	0	0	0	0	0	0			2020-03-24	1	1	1
1186	0	Center_05	488	0	2020-03-16	2	8	1		M	1	87	17	18	18	0	0	1	0	0		4.Critical/Fatal	5	1	1	1			censored	1	0	0	1	0	1	0	0	0	0	0	0	0	0			2020-03-24	1	1	1
1187	0	Center_05	488	0	2020-03-16	4	8	1		M	1	87	19	20	20	0	0	1	0	0		4.Critical/Fatal	5	1	1	1			censored	1	0	0	1	0	1	0	0	0	0	0	0	0	0			2020-03-24	1	1	1
1188	0	Center_05	488	0	2020-03-16	7	8	1		M	1	87	22	22	22	0	0	1	0	0		4.Critical/Fatal	5	1	1	1			censored	1	0	0	1	0	1	0	0	0	0	0	0	0	0			2020-03-24	1	1	1
1189	0	Center_05	489	1	2020-03-26	0	4	1		M	1	63	12	12	12	0	0	1	0	0		2.Moderate	2	0	0	0			censored	1	0	0	0	1	0	0	0	0	0	0	0	0	0		2020-03-30	0	0	0	0
1190	0	Center_05	489	0	2020-03-26	4	4	1		M	1	63	16	16	16	0	0	1	0	0		2.Moderate	2	0	0	0			censored	1	0	0	0	1	0	0	0	0	0	0	0	0	0		2020-03-30	0	0	0	0
1191	0	Center_05	490	1	2020-03-30	4	7	1		F	0	56	12	12	12	0	0	1	0	0		3.Severe	3	0	0	1				0	0	0	0	0	0	0	0	0	0	0	0	0	0		2020-04-06	0	0	0	0
1192	0	Center_05	490	0	2020-03-30	7	7	1		F	0	56	15	16	16	0	0	1	0	0		3.Severe	3	0	0	1				0	0	0	0	0	0	0	0	0	0	0	0	0	0		2020-04-06	0	0	0	0
1193	0	Center_05	491	1	2020-03-17	1	11	1		M	1	68	9	9	10	0	0	0	1	1		4.Critical/Fatal	4	1	1	1				0	0	0	0	0	0	0	0	0	0	0	0	0	0		2020-03-28	0	0	1	1
1194	0	Center_05	491	0	2020-03-17	2	11	1		M	1	68	10	10	10	0	0	0	1	1		4.Critical/Fatal	4	1	1	1				0	0	0	0	0	0	0	0	0	0	0	0	0	0		2020-03-28	0	0	1	1
1195	0	Center_05	491	0	2020-03-17	3	11	1		M	1	68	11	11	12	0	0	0	1	1		4.Critical/Fatal	4	1	1	1				0	0	0	0	0	0	0	0	0	0	0	0	0	0		2020-03-28	0	0	1	1
1196	0	Center_05	491	0	2020-03-17	6	11	1		M	1	68	14	14	14	0	0	0	1	1		4.Critical/Fatal	4	1	1	1				0	0	0	0	0	0	0	0	0	0	0	0	0	0		2020-03-28	0	0	1	1
1197	0	Center_05	491	0	2020-03-17	8	11	0		M	1	68	16	16	16	0	0	0	1	1		4.Critical/Fatal	4	1	1	1				0	0	0	0	0	0	0	0	0	0	0	0	0	0		2020-03-28	0	0	1	1
1198	0	Center_05	491	0	2020-03-17	10	11	0		M	1	68	18	18	18	0	0	0	1	1		4.Critical/Fatal	4	1	1	1				0	0	0	0	0	0	0	0	0	0	0	0	0	0		2020-03-28	0	0	1	1
1199	0	Center_05	492	1	2020-03-24	0	1	1		M	1	59	10	10	10	0	0	1	0	0		2.Moderate	2	0	0	0				0	0	0	0	0	0	0	0	0	0	0	0	0	0		2020-03-25	0	0	0	0
1200	0	Center_05	492	0	2020-03-24	1	1	1		M	1	59	11	11	12	0	0	1	0	0		2.Moderate	2	0	0	0				0	0	0	0	0	0	0	0	0	0	0	0	0	0		2020-03-25	0	0	0	0
1201	0	Center_05	493	1	2020-03-22	0	7	1		M	1	42	10	10	10	0	0	1	0	0		3.Severe	3	0	0	1			censored	0	0	0	0	0	0	0	0	0	0	0	0	0	0		2020-03-29	0	0	0	0
1202	0	Center_05	493	0	2020-03-22	1	7	1		M	1	42	11	11	12	0	0	1	0	0		3.Severe	3	0	0	1			censored	0	0	0	0	0	0	0	0	0	0	0	0	0	0		2020-03-29	0	0	0	0
1203	0	Center_05	494	1	2020-03-24	0	4	1		M	1	65	7	7	8	1	0	1	0	0		2.Moderate	2	0	0	0				0	0	0	0	0	0	0	0	0	0	0	0	0	0		2020-03-28	0	0	0	0
1204	0	Center_05	494	0	2020-03-24	2	4	1		M	1	65	9	9	10	0	0	1	0	0		2.Moderate	2	0	0	0				0	0	0	0	0	0	0	0	0	0	0	0	0	0		2020-03-28	0	0	0	0
1205	0	Center_05	494	0	2020-03-24	3	4	1		M	1	65	10	10	10	0	0	1	0	0		2.Moderate	2	0	0	0				0	0	0	0	0	0	0	0	0	0	0	0	0	0		2020-03-28	0	0	0	0
1206	0	Center_05	495	1	2020-03-30	0	22	1		M	1	67	10	10	10	0	0	0	1	1		4.Critical/Fatal	4	1	1	1				0	0	0	0	0	0	0	0	0	0	0	0	0	0		2020-04-21	0	0	1	1
1207	0	Center_05	495	0	2020-03-30	2	22	1		M	1	67	12	12	12	0	0	0	1	1		4.Critical/Fatal	4	1	1	1				0	0	0	0	0	0	0	0	0	0	0	0	0	0		2020-04-21	0	0	1	1
1208	0	Center_05	495	0	2020-03-30	4	22	1		M	1	67	14	14	14	0	0	0	1	1		4.Critical/Fatal	4	1	1	1				0	0	0	0	0	0	0	0	0	0	0	0	0	0		2020-04-21	0	0	1	1
1209	0	Center_05	495	0	2020-03-30	6	22	1		M	1	67	16	16	16	0	0	0	1	1		4.Critical/Fatal	4	1	1	1				0	0	0	0	0	0	0	0	0	0	0	0	0	0		2020-04-21	0	0	1	1
1210	0	Center_05	495	0	2020-03-30	6	22	1		M	1	67	16	16	16	0	0	0	1	1		4.Critical/Fatal	4	1	1	1				0	0	0	0	0	0	0	0	0	0	0	0	0	0		2020-04-21	0	0	1	1
1211	0	Center_05	495	0	2020-03-30	7	22	1		M	1	67	17	18	18	0	0	0	1	1		4.Critical/Fatal	4	1	1	1				0	0	0	0	0	0	0	0	0	0	0	0	0	0		2020-04-21	0	0	1	1
1212	0	Center_05	496	1	2020-03-22	0	2	1		M	1	86	5	5	6	1	0	1	0	0		4.Critical/Fatal	5	1	1	1			censored	1	1	0	0	0	0	0	0	0	0	0	0	0	0			2020-03-24	1	1	1
1213	0	Center_05	496	0	2020-03-22	1	2	1		M	1	86	6	6	6	1	0	1	0	0		4.Critical/Fatal	5	1	1	1			censored	1	1	0	0	0	0	0	0	0	0	0	0	0	0			2020-03-24	1	1	1
1214	0	Center_05	497	1	2020-03-25	9	26	0		M	1	49	17	18	18	0	0	0	1	1		4.Critical/Fatal	4	1	1	1			censored	1	1	0	0	0	0	0	0	0	0	0	0	0	0		2020-04-20	0	0	1	1
1215	0	Center_05	497	0	2020-03-25	12	26	0		M	1	49	20	20	20	0	0	0	1	1		4.Critical/Fatal	4	1	1	1			censored	1	1	0	0	0	0	0	0	0	0	0	0	0	0		2020-04-20	0	0	1	1
1216	0	Center_05	498	1	2020-03-22	0	5	1		F	0	22	7	7	8	1	0	1	0	0		2.Moderate	2	0	0	0			censored	0	0	0	0	0	0	0	0	0	0	0	0	0	0		2020-03-27	0	0	0	0
1217	0	Center_05	498	0	2020-03-22	1	5	1		F	0	22	8	8	8	0	0	1	0	0		2.Moderate	2	0	0	0			censored	0	0	0	0	0	0	0	0	0	0	0	0	0	0		2020-03-27	0	0	0	0
1218	0	Center_05	498	0	2020-03-22	3	5	1		F	0	22	10	10	10	0	0	1	0	0		2.Moderate	2	0	0	0			censored	0	0	0	0	0	0	0	0	0	0	0	0	0	0		2020-03-27	0	0	0	0
1219	0	Center_05	498	0	2020-03-22	5	5	1		F	0	22	12	12	12	0	0	1	0	0		2.Moderate	2	0	0	0			censored	0	0	0	0	0	0	0	0	0	0	0	0	0	0		2020-03-27	0	0	0	0
1220	0	Center_05	499	1		0	0	1		F	0	87	21	22	22	0	1	0	0	1		1.Mild	1	0	0	0				0	0	0	0	0	0	0	0	0	0	0	0	0	0		2020-03-30	0	0	0	0
1221	0	Center_05	500	1	2020-03-23	0	14	1		M	1	84	14	14	14	0	0	1	0	0		4.Critical/Fatal	5	1	1	1			censored	1	1	0	0	0	0	0	0	0	0	0	0	0	0			2020-04-06	1	1	1
1222	0	Center_05	500	0	2020-03-23	1	14	1		M	1	84	15	16	16	0	0	1	0	0		4.Critical/Fatal	5	1	1	1			censored	1	1	0	0	0	0	0	0	0	0	0	0	0	0			2020-04-06	1	1	1
1223	0	Center_05	500	0	2020-03-23	2	14	1		M	1	84	16	16	16	0	0	1	0	0		4.Critical/Fatal	5	1	1	1			censored	1	1	0	0	0	0	0	0	0	0	0	0	0	0			2020-04-06	1	1	1
1224	0	Center_05	500	0	2020-03-23	4	14	1		M	1	84	18	18	18	0	0	1	0	0		4.Critical/Fatal	5	1	1	1			censored	1	1	0	0	0	0	0	0	0	0	0	0	0	0			2020-04-06	1	1	1
1225	0	Center_05	500	0	2020-03-23	7	14	1		M	1	84	21	22	22	0	0	1	0	0		4.Critical/Fatal	5	1	1	1			censored	1	1	0	0	0	0	0	0	0	0	0	0	0	0			2020-04-06	1	1	1
1226	0	Center_05	500	0	2020-03-23	9	14	0		M	1	84	23	24	24	0	0	1	0	0		4.Critical/Fatal	5	1	1	1			censored	1	1	0	0	0	0	0	0	0	0	0	0	0	0			2020-04-06	1	1	1
1227	0	Center_05	501	1	2020-03-19	0	18	1		M	1	85	9	9	10	0	0	1	0	0		3.Severe	3	0	0	1			censored	1	0	0	0	1	0	0	0	0	0	0	0	0	0		2020-04-06	0	0	0	0
1228	0	Center_05	501	0	2020-03-19	4	18	1		M	1	85	13	13	14	0	0	1	0	0		3.Severe	3	0	0	1			censored	1	0	0	0	1	0	0	0	0	0	0	0	0	0		2020-04-06	0	0	0	0
1229	0	Center_05	501	0	2020-03-19	6	18	1		M	1	85	15	16	16	0	0	1	0	0		3.Severe	3	0	0	1			censored	1	0	0	0	1	0	0	0	0	0	0	0	0	0		2020-04-06	0	0	0	0
1230	0	Center_05	501	0	2020-03-19	8	18	0		M	1	85	17	18	18	0	0	1	0	0		3.Severe	3	0	0	1			censored	1	0	0	0	1	0	0	0	0	0	0	0	0	0		2020-04-06	0	0	0	0
1231	0	Center_05	501	0	2020-03-19	11	18	0		M	1	85	20	20	20	0	0	1	0	0		3.Severe	3	0	0	1			censored	1	0	0	0	1	0	0	0	0	0	0	0	0	0		2020-04-06	0	0	0	0
1232	0	Center_05	502	1	2020-03-28	0	1	1		F	0	57	11	11	12	0	0	1	0	0		2.Moderate	2	0	0	0			censored	0	0	0	0	0	0	0	0	0	0	0	0	0	0		2020-03-29	0	0	0	0
1233	0	Center_05	503	1	2020-03-15	0	9	1		M	1	76	4	4	4	1	0	0	1	1		4.Critical/Fatal	5	1	1	1			censored	1	0	0	0	1	0	0	0	0	0	0	0	0	0			2020-03-24	1	1	1
1234	0	Center_05	503	0	2020-03-15	1	9	1		M	1	76	5	5	6	1	0	0	1	1		4.Critical/Fatal	5	1	1	1			censored	1	0	0	0	1	0	0	0	0	0	0	0	0	0			2020-03-24	1	1	1
1235	0	Center_05	504	1	2020-03-19	0	27	1		M	1	76	5	5	6	1	0	1	0	0		3.Severe	3	0	0	1			censored	1	1	0	0	0	1	0	0	0	0	0	0	0	0		2020-04-15	0	0	0	0
1236	0	Center_05	504	0	2020-03-19	13	27	0		M	1	76	18	18	18	0	0	1	0	0		3.Severe	3	0	0	1			censored	1	1	0	0	0	1	0	0	0	0	0	0	0	0		2020-04-15	0	0	0	0
1237	0	Center_05	504	0	2020-03-19	15	27	0		M	1	76	20	20	20	0	0	1	0	0		3.Severe	3	0	0	1			censored	1	1	0	0	0	1	0	0	0	0	0	0	0	0		2020-04-15	0	0	0	0
1238	0	Center_05	504	0	2020-03-19	18	27	0		M	1	76	23	24	24	0	0	1	0	0		3.Severe	3	0	0	1			censored	1	1	0	0	0	1	0	0	0	0	0	0	0	0		2020-04-15	0	0	0	0
1239	0	Center_05	505	1	2020-03-19	0	2	1		M	1	43	18	18	18	0	0	1	0	0		2.Moderate	2	0	0	0			censored	0	0	0	0	0	0	0	0	0	0	0	0	0	0		2020-03-21	0	0	0	0
1240	0	Center_05	506	1	2020-04-04	0	14	1		M	1	60	10	10	10	0	0	0	1	1		4.Critical/Fatal	5	1	1	1			censored	0	0	0	0	0	0	0	0	0	0	0	0	0	0			2020-04-18	1	1	1
1241	0	Center_05	506	0	2020-04-04	2	14	1		M	1	60	12	12	12	0	0	0	1	1		4.Critical/Fatal	5	1	1	1			censored	0	0	0	0	0	0	0	0	0	0	0	0	0	0			2020-04-18	1	1	1
1242	0	Center_05	507	1	2020-03-25	0	8	1		M	1	63	7	7	8	1	0	1	0	0		3.Severe	3	0	0	1			censored	1	0	0	1	0	0	1	0	0	0	0	0	0	0		2020-04-02	0	0	0	0
1243	0	Center_05	507	0	2020-03-25	7	8	1		M	1	63	14	14	14	0	0	1	0	0		3.Severe	3	0	0	1			censored	1	0	0	1	0	0	1	0	0	0	0	0	0	0		2020-04-02	0	0	0	0
1244	0	Center_05	508	1	2020-03-23	0	1	1		M	1	73	20	20	20	0	0	1	0	0		2.Moderate	2	0	0	0				0	0	0	0	0	0	0	0	0	0	0	0	0	0		2020-03-24	0	0	0	0
1245	0	Center_05	509	1	2020-04-06	0	6	1		F	0	56	2	2	2	1	0	1	0	0		3.Severe	3	0	0	1				0	0	0	0	0	0	0	0	0	0	0	0	0	0		2020-04-12	0	0	0	0
1246	0	Center_05	510	1	2020-03-30	0	11	1		M	1	87	8	8	8	0	0	1	0	0		3.Severe	3	0	0	1			censored	1	1	0	0	0	0	0	0	0	0	0	0	0	0		2020-04-10	0	0	0	0
1247	0	Center_05	510	0	2020-03-30	2	11	1		M	1	87	10	10	10	0	0	1	0	0		3.Severe	3	0	0	1			censored	1	1	0	0	0	0	0	0	0	0	0	0	0	0		2020-04-10	0	0	0	0
1248	0	Center_05	510	0	2020-03-30	4	11	1		M	1	87	12	12	12	0	0	1	0	0		3.Severe	3	0	0	1			censored	1	1	0	0	0	0	0	0	0	0	0	0	0	0		2020-04-10	0	0	0	0
1249	0	Center_05	510	0	2020-03-30	7	11	1		M	1	87	15	16	16	0	0	1	0	0		3.Severe	3	0	0	1			censored	1	1	0	0	0	0	0	0	0	0	0	0	0	0		2020-04-10	0	0	0	0
1250	0	Center_05	511	1	2020-03-23	0	shift	1		M	1	77	7	7	8	1	0	0	1	1		4.Critical/Fatal	4	1	1	1			censored	1	1	0	0	0	0	0	0	0	0	0	0	0	0			0	0	1	1
1251	0	Center_05	511	0	2020-03-23	1	shift	1		M	1	77	8	8	8	0	0	0	1	1		4.Critical/Fatal	4	1	1	1			censored	1	1	0	0	0	0	0	0	0	0	0	0	0	0			0	0	1	1
1252	0	Center_05	512	1	2020-03-22	0	17	1		F	0	77	7	7	8	1	0	1	0	0		3.Severe	3	0	0	1			censored	1	1	0	0	0	0	0	0	0	0	0	0	0	0		2020-04-08	0	0	0	0
1253	0	Center_05	512	0	2020-03-22	1	17	1		F	0	77	8	8	8	0	0	1	0	0		3.Severe	3	0	0	1			censored	1	1	0	0	0	0	0	0	0	0	0	0	0	0		2020-04-08	0	0	0	0
1254	0	Center_05	512	0	2020-03-22	3	17	1		F	0	77	10	10	10	0	0	1	0	0		3.Severe	3	0	0	1			censored	1	1	0	0	0	0	0	0	0	0	0	0	0	0		2020-04-08	0	0	0	0
1255	0	Center_05	512	0	2020-03-22	5	17	1		F	0	77	12	12	12	0	0	1	0	0		3.Severe	3	0	0	1			censored	1	1	0	0	0	0	0	0	0	0	0	0	0	0		2020-04-08	0	0	0	0
1256	0	Center_05	512	0	2020-03-22	8	17	0		F	0	77	15	16	16	0	0	1	0	0		3.Severe	3	0	0	1			censored	1	1	0	0	0	0	0	0	0	0	0	0	0	0		2020-04-08	0	0	0	0
1257	0	Center_05	512	0	2020-03-22	12	17	0		F	0	77	19	20	20	0	0	1	0	0		3.Severe	3	0	0	1			censored	1	1	0	0	0	0	0	0	0	0	0	0	0	0		2020-04-08	0	0	0	0
1258	0	Center_05	513	1	2020-03-17	0	7	1		M	1	82	4	4	4	1	0	1	0	0		4.Critical/Fatal	5	1	1	1			censored	1	1	0	0	1	0	0	0	0	0	0	0	0	0			2020-03-24	1	1	1
1259	0	Center_05	513	0	2020-03-17	1	7	1		M	1	82	5	5	6	1	0	1	0	0		4.Critical/Fatal	5	1	1	1			censored	1	1	0	0	1	0	0	0	0	0	0	0	0	0			2020-03-24	1	1	1
1260	0	Center_05	513	0	2020-03-17	3	7	1		M	1	82	7	7	8	1	0	1	0	0		4.Critical/Fatal	5	1	1	1			censored	1	1	0	0	1	0	0	0	0	0	0	0	0	0			2020-03-24	1	1	1
1261	0	Center_05	514	1	2020-03-16	0	19	1		F	0	79	5	5	6	1	0	0	1	1		4.Critical/Fatal	5	1	1	1			censored	1	1	0	0	0	0	0	0	0	0	0	0	0	0			2020-04-04	1	1	1
1262	0	Center_05	514	0	2020-03-16	1	19	1		F	0	79	6	6	6	1	0	0	1	1		4.Critical/Fatal	5	1	1	1			censored	1	1	0	0	0	0	0	0	0	0	0	0	0	0			2020-04-04	1	1	1
1263	0	Center_05	514	0	2020-03-16	3	19	1		F	0	79	8	8	8	0	0	0	1	1		4.Critical/Fatal	5	1	1	1			censored	1	1	0	0	0	0	0	0	0	0	0	0	0	0			2020-04-04	1	1	1
1264	0	Center_05	514	0	2020-03-16	7	19	1		F	0	79	13	13	14	0	0	0	1	1		4.Critical/Fatal	5	1	1	1			censored	1	1	0	0	0	0	0	0	0	0	0	0	0	0			2020-04-04	1	1	1
1265	0	Center_05	514	0	2020-03-16	10	19	0		F	0	79	16	16	16	0	0	0	1	1		4.Critical/Fatal	5	1	1	1			censored	1	1	0	0	0	0	0	0	0	0	0	0	0	0			2020-04-04	1	1	1
1266	0	Center_05	514	0	2020-03-16	11	19	0		F	0	79	17	18	18	0	0	0	1	1		4.Critical/Fatal	5	1	1	1			censored	1	1	0	0	0	0	0	0	0	0	0	0	0	0			2020-04-04	1	1	1
1267	0	Center_05	514	0	2020-03-16	14	19	0		F	0	79	20	20	20	0	0	0	1	1		4.Critical/Fatal	5	1	1	1			censored	1	1	0	0	0	0	0	0	0	0	0	0	0	0			2020-04-04	1	1	1
1268	0	Center_05	514	0	2020-03-16	16	19	0		F	0	79	22	22	22	0	0	0	1	1		4.Critical/Fatal	5	1	1	1			censored	1	1	0	0	0	0	0	0	0	0	0	0	0	0			2020-04-04	1	1	1
1269	0	Center_05	515	1	2020-03-19	1	4	1		M	1	70	10	10	10	0	0	1	0	0		2.Moderate	2	0	0	0			censored	1	0	0	0	0	0	0	0	0	0	0	0	1	0		2020-03-23	0	0	0	0
1270	0	Center_05	515	0	2020-03-19	4	4	1		M	1	70	13	13	14	0	0	1	0	0		2.Moderate	2	0	0	0			censored	1	0	0	0	0	0	0	0	0	0	0	0	1	0		2020-03-23	0	0	0	0
1271	0	Center_05	516	1	2020-03-23	0	10	1		F	0	79	4	4	4	1	0	1	0	0		3.Severe	3	0	0	1			censored	1	1	0	0	0	0	0	0	0	0	0	0	0	0		2020-04-02	0	0	0	0
1272	0	Center_05	516	0	2020-03-23	1	10	1		F	0	79	5	5	6	1	0	1	0	0		3.Severe	3	0	0	1			censored	1	1	0	0	0	0	0	0	0	0	0	0	0	0		2020-04-02	0	0	0	0
1273	0	Center_05	516	0	2020-03-23	2	10	1		F	0	79	6	6	6	1	0	1	0	0		3.Severe	3	0	0	1			censored	1	1	0	0	0	0	0	0	0	0	0	0	0	0		2020-04-02	0	0	0	0
1274	0	Center_05	516	0	2020-03-23	4	10	1		F	0	79	8	8	8	0	0	1	0	0		3.Severe	3	0	0	1			censored	1	1	0	0	0	0	0	0	0	0	0	0	0	0		2020-04-02	0	0	0	0
1275	0	Center_05	516	0	2020-03-23	7	10	1		F	0	79	11	11	12	0	0	1	0	0		3.Severe	3	0	0	1			censored	1	1	0	0	0	0	0	0	0	0	0	0	0	0		2020-04-02	0	0	0	0
1276	0	Center_05	517	1	2020-03-28	0	19	1		F	0	58	7	7	8	1	0	1	0	0		3.Severe	3	0	0	1			censored	0	0	0	0	0	0	0	0	0	0	0	0	0	0		2020-04-16	0	0	0	0
1277	0	Center_05	517	0	2020-03-28	1	19	1		F	0	58	8	8	8	0	0	1	0	0		3.Severe	3	0	0	1			censored	0	0	0	0	0	0	0	0	0	0	0	0	0	0		2020-04-16	0	0	0	0
1278	0	Center_05	517	0	2020-03-28	3	19	1		F	0	58	10	10	10	0	0	1	0	0		3.Severe	3	0	0	1			censored	0	0	0	0	0	0	0	0	0	0	0	0	0	0		2020-04-16	0	0	0	0
1279	0	Center_05	517	0	2020-03-28	5	19	1		F	0	58	12	12	12	0	0	1	0	0		3.Severe	3	0	0	1			censored	0	0	0	0	0	0	0	0	0	0	0	0	0	0		2020-04-16	0	0	0	0
1280	0	Center_05	517	0	2020-03-28	9	19	0		F	0	58	16	16	16	0	0	1	0	0		3.Severe	3	0	0	1			censored	0	0	0	0	0	0	0	0	0	0	0	0	0	0		2020-04-16	0	0	0	0
1281	0	Center_05	517	0	2020-03-28	10	19	0		F	0	58	17	18	18	0	0	1	0	0		3.Severe	3	0	0	1			censored	0	0	0	0	0	0	0	0	0	0	0	0	0	0		2020-04-16	0	0	0	0
1282	0	Center_05	518	1	2020-04-03	0	2	1		M	1	86	14	14	14	0	0	1	0	0		4.Critical/Fatal	5	1	1	1			censored	1	1	0	0	0	0	0	0	0	0	0	0	0	0			2020-04-05	1	1	1
1283	0	Center_05	519	1	2020-03-26	0	9	1		M	1	57	13	13	14	0	0	1	0	0		3.Severe	3	0	0	1				0	0	0	0	0	0	0	0	0	0	0	0	0	0		2020-04-04	0	0	0	0
1284	0	Center_05	519	0	2020-03-26	4	9	1		M	1	57	17	18	18	0	0	1	0	0		3.Severe	3	0	0	1				0	0	0	0	0	0	0	0	0	0	0	0	0	0		2020-04-04	0	0	0	0
1285	0	Center_05	519	0	2020-03-26	6	9	1		M	1	57	19	20	20	0	0	1	0	0		3.Severe	3	0	0	1				0	0	0	0	0	0	0	0	0	0	0	0	0	0		2020-04-04	0	0	0	0
1286	0	Center_05	519	0	2020-03-26	8	9	0		M	1	57	21	22	22	0	0	1	0	0		3.Severe	3	0	0	1				0	0	0	0	0	0	0	0	0	0	0	0	0	0		2020-04-04	0	0	0	0
1287	0	Center_05	520	1	2020-03-29	0	9	1		F	0	82	8	8	8	0	0	1	0	0		3.Severe	3	0	0	1				0	0	0	0	0	0	0	0	0	0	0	0	0	0		2020-04-07	0	0	0	0
1288	0	Center_05	520	0	2020-03-29	3	9	1		F	0	82	11	11	12	0	0	1	0	0		3.Severe	3	0	0	1				0	0	0	0	0	0	0	0	0	0	0	0	0	0		2020-04-07	0	0	0	0
1289	0	Center_05	520	0	2020-03-29	5	9	1		F	0	82	13	13	14	0	0	1	0	0		3.Severe	3	0	0	1				0	0	0	0	0	0	0	0	0	0	0	0	0	0		2020-04-07	0	0	0	0
1290	0	Center_05	520	0	2020-03-29	8	9	0		F	0	82	16	16	16	0	0	1	0	0		3.Severe	3	0	0	1				0	0	0	0	0	0	0	0	0	0	0	0	0	0		2020-04-07	0	0	0	0
1291	0	Center_05	521	1	2020-03-19	0	0	1		F	0	66	2	2	2	1	1	0	0	1		1.Mild	1	0	0	0			censored	1	1	0	0	0	0	0	0	0	0	0	0	0	0		2020-03-20	0	0	0	0
1292	0	Center_05	522	1	2020-04-03	0	7	1		F	0	82	3	3	4	1	0	1	0	0		3.Severe	3	0	0	1			censored	0	0	0	0	0	0	0	0	0	0	0	0	0	0		2020-04-10	0	0	0	0
1293	0	Center_05	522	0	2020-04-03	3	7	1		F	0	82	6	6	6	1	0	1	0	0		3.Severe	3	0	0	1			censored	0	0	0	0	0	0	0	0	0	0	0	0	0	0		2020-04-10	0	0	0	0
1294	0	Center_05	523	1	2020-04-04	0	3	1		F	0	52	7	7	8	1	0	1	0	0		2.Moderate	2	0	0	0			0	0	0	0	0	0	0	0	0	0	0	0	0	0	0		2020-04-07	0	0	0	0
1295	0	Center_05	523	0	2020-04-04	1	3	1		F	0	52	8	8	8	0	0	1	0	0		2.Moderate	2	0	0	0			0	0	0	0	0	0	0	0	0	0	0	0	0	0	0		2020-04-07	0	0	0	0
1296	0	Center_05	524	1	2020-03-17	0	3	1		F	0	85	5	5	6	1	0	1	0	0		4.Critical/Fatal	5	1	1	1				0	0	0	0	0	0	0	0	0	0	0	0	0	0			2020-03-20	1	1	1
1297	0	Center_05	525	1	2020-04-03	0	18	1		M	1	69	11	11	12	0	0	0	1	1		4.Critical/Fatal	4	1	1	1				0	0	0	0	0	0	0	0	0	0	0	0	0	0		2020-04-21	0	0	1	1
1298	0	Center_05	525	0	2020-04-03	1	18	1		M	1	69	12	12	12	0	0	0	1	1		4.Critical/Fatal	4	1	1	1				0	0	0	0	0	0	0	0	0	0	0	0	0	0		2020-04-21	0	0	1	1
1299	0	Center_05	525	0	2020-04-03	3	18	1		M	1	69	14	14	14	0	0	0	1	1		4.Critical/Fatal	4	1	1	1				0	0	0	0	0	0	0	0	0	0	0	0	0	0		2020-04-21	0	0	1	1
1300	0	Center_05	526	1	2020-03-23	0	shift	1		M	1	88	14	14	14	0	0	1	0	0		3.Severe	3	0	0	1			censored	1	1	0	0	0	0	0	0	0	0	0	0	0	0			0	0	0	0
1301	0	Center_05	526	0	2020-03-23	1	shift	1		M	1	88	15	16	16	0	0	1	0	0		3.Severe	3	0	0	1			censored	1	1	0	0	0	0	0	0	0	0	0	0	0	0			0	0	0	0
1302	0	Center_05	527	1	2020-03-26	0	18	1		M	1	87	12	12	12	0	0	1	0	0		3.Severe	3	0	0	1			censored	1	1	0	0	0	1	0	0	0	0	0	0	0	0		2020-04-13	0	0	0	0
1303	0	Center_05	527	0	2020-03-26	3	18	1		M	1	87	15	16	16	0	0	1	0	0		3.Severe	3	0	0	1			censored	1	1	0	0	0	1	0	0	0	0	0	0	0	0		2020-04-13	0	0	0	0
1304	0	Center_05	527	0	2020-03-26	4	18	1		M	1	87	16	16	16	0	0	1	0	0		3.Severe	3	0	0	1			censored	1	1	0	0	0	1	0	0	0	0	0	0	0	0		2020-04-13	0	0	0	0
1305	0	Center_05	527	0	2020-03-26	6	18	1		M	1	87	18	18	18	0	0	1	0	0		3.Severe	3	0	0	1			censored	1	1	0	0	0	1	0	0	0	0	0	0	0	0		2020-04-13	0	0	0	0
1306	0	Center_05	527	0	2020-03-26	8	18	0		M	1	87	20	20	20	0	0	1	0	0		3.Severe	3	0	0	1			censored	1	1	0	0	0	1	0	0	0	0	0	0	0	0		2020-04-13	0	0	0	0
1307	0	Center_05	527	0	2020-03-26	11	18	0		M	1	87	23	24	24	0	0	1	0	0		3.Severe	3	0	0	1			censored	1	1	0	0	0	1	0	0	0	0	0	0	0	0		2020-04-13	0	0	0	0
1308	0	Center_05	528	1	2020-03-23	0	3	1		M	1	83	10	10	10	0	0	1	0	0		4.Critical/Fatal	5	1	1	1				0	0	0	0	0	0	0	0	0	0	0	0	0	0			2020-03-26	1	1	1
1309	0	Center_05	528	0	2020-03-23	2	3	1		M	1	83	12	12	12	0	0	1	0	0		4.Critical/Fatal	5	1	1	1				0	0	0	0	0	0	0	0	0	0	0	0	0	0			2020-03-26	1	1	1
1310	0	Center_05	529	1	2020-03-17	0	14	1		M	1	89	7	7	8	1	0	1	0	0		3.Severe	3	0	0	1				0	0	0	0	0	0	0	0	0	0	0	0	0	0		2020-03-31	0	0	0	0
1311	0	Center_05	529	0	2020-03-17	3	14	1		M	1	89	10	10	10	0	0	1	0	0		3.Severe	3	0	0	1				0	0	0	0	0	0	0	0	0	0	0	0	0	0		2020-03-31	0	0	0	0
1312	0	Center_05	529	0	2020-03-17	6	14	1		M	1	89	13	13	14	0	0	1	0	0		3.Severe	3	0	0	1				0	0	0	0	0	0	0	0	0	0	0	0	0	0		2020-03-31	0	0	0	0
1313	0	Center_05	529	0	2020-03-17	8	14	0		M	1	89	15	16	16	0	0	1	0	0		3.Severe	3	0	0	1				0	0	0	0	0	0	0	0	0	0	0	0	0	0		2020-03-31	0	0	0	0
1314	0	Center_05	529	0	2020-03-17	13	14	0		M	1	89	20	20	20	0	0	1	0	0		3.Severe	3	0	0	1				0	0	0	0	0	0	0	0	0	0	0	0	0	0		2020-03-31	0	0	0	0
1315	0	Center_05	530	1	2020-03-23	0	30	1		M	1	72	12	12	12	0	0	0	1	1		4.Critical/Fatal	4	1	1	1				0	0	0	0	0	0	0	0	0	0	0	0	0	0		2020-05-01	0	0	1	1
1316	0	Center_05	530	0	2020-03-23	2	30	1		M	1	72	14	14	14	0	0	0	1	1		4.Critical/Fatal	4	1	1	1				0	0	0	0	0	0	0	0	0	0	0	0	0	0		2020-05-01	0	0	1	1
1317	0	Center_05	530	0	2020-03-23	8	30	0		M	1	72	20	20	20	0	0	0	1	1		4.Critical/Fatal	4	1	1	1				0	0	0	0	0	0	0	0	0	0	0	0	0	0		2020-05-01	0	0	1	1
1318	0	Center_05	531	1	2020-03-23	0	1	1		M	1	61	7	7	8	1	0	1	0	0		2.Moderate	2	0	0	0				0	0	0	0	0	0	0	0	0	0	0	0	0	0		2020-03-24	0	0	0	0
1319	0	Center_05	532	1		0	0	1		M	1	35	11	11	12	0	1	0	0	1		1.Mild	1	0	0	0				0	0	0	0	0	0	0	0	0	0	0	0	0	0		2020-03-23	0	0	0	0
1320	0	Center_05	533	1	2020-03-19	0	6	1		F	0	75	14	14	14	0	0	1	0	0		3.Severe	3	0	0	1			censored	0	0	0	0	0	0	0	0	0	0	0	0	0	0		2020-03-25	0	0	0	0
1321	0	Center_05	533	0	2020-03-19	1	6	1		F	0	75	15	16	16	0	0	1	0	0		3.Severe	3	0	0	1			censored	0	0	0	0	0	0	0	0	0	0	0	0	0	0		2020-03-25	0	0	0	0
1322	0	Center_05	533	0	2020-03-19	4	6	1		F	0	75	18	18	18	0	0	1	0	0		3.Severe	3	0	0	1			censored	0	0	0	0	0	0	0	0	0	0	0	0	0	0		2020-03-25	0	0	0	0
1323	0	Center_05	533	0	2020-03-19	6	6	1		F	0	75	20	20	20	0	0	1	0	0		3.Severe	3	0	0	1			censored	0	0	0	0	0	0	0	0	0	0	0	0	0	0		2020-03-25	0	0	0	0
1324	0	Center_05	534	1	2020-03-30	0	17	1		M	1	89	5	5	6	1	0	1	0	0		4.Critical/Fatal	5	1	1	1				0	0	0	0	0	0	0	0	0	0	0	0	0	0			2020-04-16	1	1	1
1325	0	Center_05	534	0	2020-03-30	2	17	1		M	1	89	7	7	8	1	0	1	0	0		4.Critical/Fatal	5	1	1	1				0	0	0	0	0	0	0	0	0	0	0	0	0	0			2020-04-16	1	1	1
1326	0	Center_05	534	0	2020-03-30	4	17	1		M	1	89	9	9	10	0	0	1	0	0		4.Critical/Fatal	5	1	1	1				0	0	0	0	0	0	0	0	0	0	0	0	0	0			2020-04-16	1	1	1
1327	0	Center_05	534	0	2020-03-30	5	17	1		M	1	89	10	10	10	0	0	1	0	0		4.Critical/Fatal	5	1	1	1				0	0	0	0	0	0	0	0	0	0	0	0	0	0			2020-04-16	1	1	1
1328	0	Center_05	534	0	2020-03-30	7	17	1		M	1	89	12	12	12	0	0	1	0	0		4.Critical/Fatal	5	1	1	1				0	0	0	0	0	0	0	0	0	0	0	0	0	0			2020-04-16	1	1	1
1329	0	Center_05	535	1	2020-03-19	0	22	1		M	1	69	10	10	10	0	0	0	1	1		4.Critical/Fatal	5	1	1	1			censored	0	0	0	0	0	0	0	0	0	0	0	0	0	0			2020-04-10	1	1	1
1330	0	Center_05	536	1	2020-04-04	0	6	1		M	1	67	4	4	4	1	0	1	0	0		3.Severe	3	0	0	1			censored	0	0	0	0	0	0	0	0	0	0	0	0	0	0		2020-04-10	0	0	0	0
1331	0	Center_05	536	0	2020-04-04	2	6	1		M	1	67	6	6	6	1	0	1	0	0		3.Severe	3	0	0	1			censored	0	0	0	0	0	0	0	0	0	0	0	0	0	0		2020-04-10	0	0	0	0
1332	0	Center_05	537	1	2020-03-30	0	7	1		M	1	77	4	4	4	1	0	1	0	0		3.Severe	3	0	0	1			censored	1	1	0	0	0	0	0	0	0	0	0	0	0	0		2020-04-06	0	0	0	0
1333	0	Center_05	537	0	2020-03-30	2	7	1		M	1	77	6	6	6	1	0	1	0	0		3.Severe	3	0	0	1			censored	1	1	0	0	0	0	0	0	0	0	0	0	0	0		2020-04-06	0	0	0	0
1334	0	Center_05	537	0	2020-03-30	4	7	1		M	1	77	8	8	8	0	0	1	0	0		3.Severe	3	0	0	1			censored	1	1	0	0	0	0	0	0	0	0	0	0	0	0		2020-04-06	0	0	0	0
1335	0	Center_05	537	0	2020-03-30	7	7	1		M	1	77	11	11	12	0	0	1	0	0		3.Severe	3	0	0	1			censored	1	1	0	0	0	0	0	0	0	0	0	0	0	0		2020-04-06	0	0	0	0
1336	0	Center_05	538	1	2020-03-23	0	0	1		F	0	63	7	7	8	1	1	0	0	1		1.Mild	1	0	0	0				0	0	0	0	0	0	0	0	0	0	0	0	0	0		2020-03-23	0	0	0	0
1337	0	Center_05	539	1	2020-03-27	0	5	1		M	1	70	11	11	12	0	0	1	0	0		2.Moderate	2	0	0	0			censored	1	1	0	0	0	0	0	0	0	0	0	0	0	0		2020-04-01	0	0	0	0
1338	0	Center_05	539	0	2020-03-27	1	5	1		M	1	70	12	12	12	0	0	1	0	0		2.Moderate	2	0	0	0			censored	1	1	0	0	0	0	0	0	0	0	0	0	0	0		2020-04-01	0	0	0	0
1339	0	Center_05	539	0	2020-03-27	3	5	1		M	1	70	14	14	14	0	0	1	0	0		2.Moderate	2	0	0	0			censored	1	1	0	0	0	0	0	0	0	0	0	0	0	0		2020-04-01	0	0	0	0
1340	0	Center_05	539	0	2020-03-27	5	5	1		M	1	70	16	16	16	0	0	1	0	0		2.Moderate	2	0	0	0			censored	1	1	0	0	0	0	0	0	0	0	0	0	0	0		2020-04-01	0	0	0	0
1341	0	Center_05	540	1	2020-04-01	0	8	1		M	1	48	9	9	10	0	0	1	0	0		3.Severe	3	0	0	1			censored	1	0	0	0	0	1	0	0	0	0	0	0	0	0		2020-04-09	0	0	0	0
1342	0	Center_05	540	0	2020-04-01	2	8	1		M	1	48	11	11	12	0	0	1	0	0		3.Severe	3	0	0	1			censored	1	0	0	0	0	1	0	0	0	0	0	0	0	0		2020-04-09	0	0	0	0
1343	0	Center_05	540	0	2020-04-01	4	8	1		M	1	48	12	12	12	0	0	1	0	0		3.Severe	3	0	0	1			censored	1	0	0	0	0	1	0	0	0	0	0	0	0	0		2020-04-09	0	0	0	0
1344	0	Center_05	540	0	2020-04-01	5	8	1		M	1	48	13	13	14	0	0	1	0	0		3.Severe	3	0	0	1			censored	1	0	0	0	0	1	0	0	0	0	0	0	0	0		2020-04-09	0	0	0	0
1345	0	Center_05	541	1	2020-03-20	0	4	1		M	1	65	5	5	6	1	0	0	1	1		4.Critical/Fatal	5	1	1	1				0	0	0	0	0	0	0	0	0	0	0	0	0	0			2020-03-24	1	1	1
1346	0	Center_05	541	0	2020-03-20	1	4	1		M	1	65	6	6	6	1	0	0	1	1		4.Critical/Fatal	5	1	1	1				0	0	0	0	0	0	0	0	0	0	0	0	0	0			2020-03-24	1	1	1
1347	0	Center_05	542	1	2020-03-26	0	7	1		F	0	34	7	7	8	1	0	1	0	0		3.Severe	3	0	0	1				0	0	0	0	0	0	0	0	0	0	0	0	0	0		2020-04-02	0	0	0	0
1348	0	Center_05	542	0	2020-03-26	4	7	1		F	0	34	11	11	12	0	0	1	0	0		3.Severe	3	0	0	1				0	0	0	0	0	0	0	0	0	0	0	0	0	0		2020-04-02	0	0	0	0
1349	0	Center_05	543	1	2020-03-30	0	shift	1		F	0	71	9	9	10	0	0	1	0	0		3.Severe	3	0	0	1			censored	1	0	0	0	0	1	0	0	0	0	0	0	0	0		2020-03-30	0	0	0	0
1350	0	Center_05	544	1	2020-03-17	0	7	1		M	1	39	5	5	6	1	0	1	0	0		3.Severe	3	0	0	1				0	0	0	0	0	0	0	0	0	0	0	0	0	0		2020-03-24	0	0	0	0
1351	0	Center_05	544	0	2020-03-17	1	7	1		M	1	39	6	6	6	1	0	1	0	0		3.Severe	3	0	0	1				0	0	0	0	0	0	0	0	0	0	0	0	0	0		2020-03-24	0	0	0	0
1352	0	Center_05	544	0	2020-03-17	3	7	1		M	1	39	8	8	8	0	0	1	0	0		3.Severe	3	0	0	1				0	0	0	0	0	0	0	0	0	0	0	0	0	0		2020-03-24	0	0	0	0
1353	0	Center_05	544	0	2020-03-17	4	7	1		M	1	39	9	9	10	0	0	1	0	0		3.Severe	3	0	0	1				0	0	0	0	0	0	0	0	0	0	0	0	0	0		2020-03-24	0	0	0	0
1354	0	Center_05	544	0	2020-03-17	6	7	1		M	1	39	11	11	12	0	0	1	0	0		3.Severe	3	0	0	1				0	0	0	0	0	0	0	0	0	0	0	0	0	0		2020-03-24	0	0	0	0
1355	0	Center_05	545	1	2020-03-18	0	4	1		M	1	57	14	14	14	0	0	1	0	0		2.Moderate	2	0	0	0			censored	1	1	0	0	0	0	0	0	0	0	0	0	0	0		2020-03-22	0	0	0	0
1356	0	Center_05	545	0	2020-03-18	2	4	1		M	1	57	16	16	16	0	0	1	0	0		2.Moderate	2	0	0	0			censored	1	1	0	0	0	0	0	0	0	0	0	0	0	0		2020-03-22	0	0	0	0
1357	0	Center_05	546	1	2020-03-23	0	shift	1		M	1	63	5	5	6	1	0	1	0	0		3.Severe	3	0	0	1			censored	1	0	0	0	0	1	0	0	0	0	0	0	0	0			0	0	0	0
1358	0	Center_06	547	1	2020-03-18	0	29	1	2020-03-18	F	0	51	7	7	8	1	0	0	1	1	blank	4.Critical/Fatal	4	1	1	1	blank	blank	censored	1	0	0	1	0	0	0	0	0	0	0	0	0	0	blank	2020-04-16	0	0	1	1
1359	0	Center_06	547	0	2020-03-18	7	29	1	2020-03-18	F	0	51	14	14	14	0	0	0	1	1	blank	4.Critical/Fatal	4	1	1	1	blank	blank	censored	1	0	0	1	0	0	0	0	0	0	0	0	0	0	blank	2020-04-16	0	0	1	1
1360	0	Center_06	547	0	2020-03-18	7	29	1	2020-03-18	F	0	51	14	14	14	0	0	0	1	1	blank	4.Critical/Fatal	4	1	1	1	blank	blank	censored	1	0	0	1	0	0	0	0	0	0	0	0	0	0	blank	2020-04-16	0	0	1	1
1361	0	Center_06	547	0	2020-03-18	8	29	0	2020-03-18	F	0	51	15	16	16	0	0	0	1	1	blank	4.Critical/Fatal	4	1	1	1	blank	blank	censored	1	0	0	1	0	0	0	0	0	0	0	0	0	0	blank	2020-04-16	0	0	1	1
1362	0	Center_06	547	0	2020-03-18	9	29	0	2020-03-18	F	0	51	16	16	16	0	0	0	1	1	blank	4.Critical/Fatal	4	1	1	1	blank	blank	censored	1	0	0	1	0	0	0	0	0	0	0	0	0	0	blank	2020-04-16	0	0	1	1
1363	0	Center_06	547	0	2020-03-18	10	29	0	2020-03-18	F	0	51	17	18	18	0	0	0	1	1	blank	4.Critical/Fatal	4	1	1	1	blank	blank	censored	1	0	0	1	0	0	0	0	0	0	0	0	0	0	blank	2020-04-16	0	0	1	1
1364	0	Center_06	547	0	2020-03-18	11	29	0	2020-03-18	F	0	51	18	18	18	0	0	0	1	1	blank	4.Critical/Fatal	4	1	1	1	blank	blank	censored	1	0	0	1	0	0	0	0	0	0	0	0	0	0	blank	2020-04-16	0	0	1	1
1365	0	Center_06	547	0	2020-03-18	12	29	0	2020-03-18	F	0	51	19	20	20	0	0	0	1	1	blank	4.Critical/Fatal	4	1	1	1	blank	blank	censored	1	0	0	1	0	0	0	0	0	0	0	0	0	0	blank	2020-04-16	0	0	1	1
1366	0	Center_06	547	0	2020-03-18	13	29	0	2020-03-18	F	0	51	20	20	20	0	0	0	1	1	blank	4.Critical/Fatal	4	1	1	1	blank	blank	censored	1	0	0	1	0	0	0	0	0	0	0	0	0	0	blank	2020-04-16	0	0	1	1
1367	0	Center_06	547	0	2020-03-18	14	29	0	2020-03-18	F	0	51	21	22	22	0	0	0	1	1	blank	4.Critical/Fatal	4	1	1	1	blank	blank	censored	1	0	0	1	0	0	0	0	0	0	0	0	0	0	blank	2020-04-16	0	0	1	1
1368	0	Center_06	547	0	2020-03-18	15	29	0	2020-03-18	F	0	51	22	22	22	0	0	0	1	1	blank	4.Critical/Fatal	4	1	1	1	blank	blank	censored	1	0	0	1	0	0	0	0	0	0	0	0	0	0	blank	2020-04-16	0	0	1	1
1369	0	Center_06	547	0	2020-03-18	16	29	0	2020-03-18	F	0	51	23	24	24	0	0	0	1	1	blank	4.Critical/Fatal	4	1	1	1	blank	blank	censored	1	0	0	1	0	0	0	0	0	0	0	0	0	0	blank	2020-04-16	0	0	1	1
1370	0	Center_06	548	1	2020-03-21	0	3	1	2020-03-10	M	1	35	20	20	20	0	0	0	1	1	blank	4.Critical/Fatal	4	1	1	1	blank	blank	censored	1	0	0	0	0	0	1	0	0	0	0	0	0	0	blank	2020-03-24	0	0	1	1
1371	0	Center_06	548	0	2020-03-21	2	3	1	2020-03-10	M	1	35	22	22	22	0	0	1	0	1	blank	3.Severe	3	0	0	1	blank	blank	censored	1	0	0	0	0	0	1	0	0	0	0	0	0	0	blank	2020-03-24	0	0	0	0
1372	0	Center_06	549	1	2020-03-11	0	27	1	2020-03-16	M	1	66	0	1	2	1	0	1	0	0	blank	3.Severe	3	0	0	1	blank	blank	censored	1	0	0	0	0	0	1	0	0	0	0	0	0	0	blank	2020-04-07	0	0	0	0
1373	0	Center_06	549	0	2020-03-11	5	27	1	2020-03-16	M	1	66	5	5	6	1	0	1	0	0	blank	3.Severe	3	0	0	1	blank	blank	censored	1	0	0	0	0	0	1	0	0	0	0	0	0	0	blank	2020-04-07	0	0	0	0
1374	0	Center_06	549	0	2020-03-11	9	27	0	2020-03-16	M	1	66	9	9	10	0	0	1	0	0	blank	3.Severe	3	0	0	1	blank	blank	censored	1	0	0	0	0	0	1	0	0	0	0	0	0	0	blank	2020-04-07	0	0	0	0
1375	0	Center_06	549	0	2020-03-11	13	27	0	2020-03-16	M	1	66	13	13	14	0	0	1	0	0	blank	3.Severe	3	0	0	1	blank	blank	censored	1	0	0	0	0	0	1	0	0	0	0	0	0	0	blank	2020-04-07	0	0	0	0
1376	0	Center_06	549	0	2020-03-11	15	27	0	2020-03-16	M	1	66	15	16	16	0	0	1	0	0	blank	3.Severe	3	0	0	1	blank	blank	censored	1	0	0	0	0	0	1	0	0	0	0	0	0	0	blank	2020-04-07	0	0	0	0
1377	0	Center_06	549	0	2020-03-11	16	27	0	2020-03-16	M	1	66	16	16	16	0	0	1	0	0	blank	3.Severe	3	0	0	1	blank	blank	censored	1	0	0	0	0	0	1	0	0	0	0	0	0	0	blank	2020-04-07	0	0	0	0
1378	0	Center_06	549	0	2020-03-11	19	27	0	2020-03-16	M	1	66	19	20	20	0	0	1	0	0	blank	3.Severe	3	0	0	1	blank	blank	censored	1	0	0	0	0	0	1	0	0	0	0	0	0	0	blank	2020-04-07	0	0	0	0
1379	0	Center_06	550	1	2020-03-14	0	2	1	2020-03-09	M	1	47	4	4	4	1	0	1	0	0	blank	2.Moderate	2	0	0	0	blank	blank	0	0	0	0	0	0	0	0	0	0	0	0	0	0	0	blank	2020-03-16	0	0	0	0
1380	0	Center_06	551	1	2020-03-17	0	13	1	2020-03-10	M	1	76	12	12	12	0	0	1	0	0	blank	3.Severe	3	0	0	1	blank	blank	censored	1	0	0	0	1	0	0	0	0	0	0	0	0	0	blank	2020-03-30	0	0	0	0
1381	0	Center_06	551	0	2020-03-17	2	13	1	2020-03-10	M	1	76	14	14	14	0	0	1	0	0	blank	3.Severe	3	0	0	1	blank	blank	censored	1	0	0	0	1	0	0	0	0	0	0	0	0	0	blank	2020-03-30	0	0	0	0
1382	0	Center_06	551	0	2020-03-17	6	13	1	2020-03-10	M	1	76	18	18	18	0	0	1	0	0	blank	3.Severe	3	0	0	1	blank	blank	censored	1	0	0	0	1	0	0	0	0	0	0	0	0	0	blank	2020-03-30	0	0	0	0
1383	0	Center_06	551	0	2020-03-17	9	13	0	2020-03-10	M	1	76	21	22	22	0	0	1	0	0	blank	3.Severe	3	0	0	1	blank	blank	censored	1	0	0	0	1	0	0	0	0	0	0	0	0	0	blank	2020-03-30	0	0	0	0
1384	0	Center_06	552	1	2020-03-07	0	12	1	2020-03-12	M	1	50	2	2	2	1	0	1	0	0	blank	3.Severe	3	0	0	1	blank	blank	censored	1	0	0	0	0	0	0	0	0	0	0	0	1	0	blank	2020-03-19	0	0	0	0
1385	0	Center_06	552	0	2020-03-07	5	12	1	2020-03-12	M	1	50	7	7	8	1	0	1	0	0	blank	3.Severe	3	0	0	1	blank	blank	censored	1	0	0	0	0	0	0	0	0	0	0	0	1	0	blank	2020-03-19	0	0	0	0
1386	0	Center_06	552	0	2020-03-07	7	12	1	2020-03-12	M	1	50	9	9	10	0	0	1	0	0	blank	3.Severe	3	0	0	1	blank	blank	censored	1	0	0	0	0	0	0	0	0	0	0	0	1	0	blank	2020-03-19	0	0	0	0
1387	0	Center_06	552	0	2020-03-07	8	12	0	2020-03-12	M	1	50	10	10	10	0	0	1	0	0	blank	3.Severe	3	0	0	1	blank	blank	censored	1	0	0	0	0	0	0	0	0	0	0	0	1	0	blank	2020-03-19	0	0	0	0
1388	0	Center_06	553	1	2020-03-11	0	6	1	2020-03-11	M	1	26	8	8	8	0	0	1	0	0	blank	3.Severe	3	0	0	1	blank	blank	0	0	0	0	0	0	0	0	0	0	0	0	0	0	0	blank	2020-03-17	0	0	0	0
1389	0	Center_06	553	0	2020-03-11	2	6	1	2020-03-11	M	1	26	10	10	10	0	0	1	0	0	blank	3.Severe	3	0	0	1	blank	blank	0	0	0	0	0	0	0	0	0	0	0	0	0	0	0	blank	2020-03-17	0	0	0	0
1390	0	Center_06	554	1	2020-03-21	0	11	1	2020-03-21	M	1	70	9	9	10	0	0	0	1	1	blank	4.Critical/Fatal	4	1	1	1	blank	blank	censored	1	0	0	0	0	0	0	1	0	0	0	0	0	0	blank	2020-04-01	0	0	1	1
1391	0	Center_06	554	0	2020-03-21	4	11	1	2020-03-21	M	1	70	13	13	14	0	0	0	1	1	blank	4.Critical/Fatal	4	1	1	1	blank	blank	censored	1	0	0	0	0	0	0	1	0	0	0	0	0	0	blank	2020-04-01	0	0	1	1
1392	0	Center_06	554	0	2020-03-21	5	11	1	2020-03-21	M	1	70	14	14	14	0	0	0	1	1	blank	4.Critical/Fatal	4	1	1	1	blank	blank	censored	1	0	0	0	0	0	0	1	0	0	0	0	0	0	blank	2020-04-01	0	0	1	1
1393	0	Center_06	554	0	2020-03-21	6	11	1	2020-03-21	M	1	70	15	16	16	0	0	0	1	1	blank	4.Critical/Fatal	4	1	1	1	blank	blank	censored	1	0	0	0	0	0	0	1	0	0	0	0	0	0	blank	2020-04-01	0	0	1	1
1394	0	Center_06	554	0	2020-03-21	7	11	1	2020-03-21	M	1	70	16	16	16	0	0	0	1	1	blank	4.Critical/Fatal	4	1	1	1	blank	blank	censored	1	0	0	0	0	0	0	1	0	0	0	0	0	0	blank	2020-04-01	0	0	1	1
1395	0	Center_06	554	0	2020-03-21	8	11	0	2020-03-21	M	1	70	17	18	18	0	0	0	1	1	blank	4.Critical/Fatal	4	1	1	1	blank	blank	censored	1	0	0	0	0	0	0	1	0	0	0	0	0	0	blank	2020-04-01	0	0	1	1
1396	0	Center_06	554	0	2020-03-21	9	11	0	2020-03-21	M	1	70	18	18	18	0	0	0	1	1	blank	4.Critical/Fatal	4	1	1	1	blank	blank	censored	1	0	0	0	0	0	0	1	0	0	0	0	0	0	blank	2020-04-01	0	0	1	1
1397	0	Center_06	554	0	2020-03-21	10	11	0	2020-03-21	M	1	70	19	20	20	0	0	0	1	1	blank	4.Critical/Fatal	4	1	1	1	blank	blank	censored	1	0	0	0	0	0	0	1	0	0	0	0	0	0	blank	2020-04-01	0	0	1	1
1398	0	Center_06	554	0	2020-03-21	11	11	0	2020-03-21	M	1	70	20	20	20	0	0	0	1	1	blank	4.Critical/Fatal	4	1	1	1	blank	blank	censored	1	0	0	0	0	0	0	1	0	0	0	0	0	0	blank	2020-04-01	0	0	1	1
1399	0	Center_06	555	1	2020-03-22	0	shift	1	2020-03-20	F	0	38	8	8	8	0	0	0	1	1	blank	4.Critical/Fatal	4	1	1	1	blank	blank	censored	1	0	0	0	0	0	0	0	0	0	0	0	1	0	blank	0	0	0	1	1
1400	0	Center_06	555	0	2020-03-22	3	shift	1	2020-03-20	F	0	38	11	11	12	0	0	0	1	1	blank	4.Critical/Fatal	4	1	1	1	blank	blank	censored	1	0	0	0	0	0	0	0	0	0	0	0	1	0	blank	0	0	0	1	1
1401	0	Center_06	555	0	2020-03-22	4	shift	1	2020-03-20	F	0	38	12	12	12	0	0	0	1	1	blank	4.Critical/Fatal	4	1	1	1	blank	blank	censored	1	0	0	0	0	0	0	0	0	0	0	0	1	0	blank	0	0	0	1	1
1402	0	Center_06	555	0	2020-03-22	5	shift	1	2020-03-20	F	0	38	13	13	14	0	0	0	1	1	blank	4.Critical/Fatal	4	1	1	1	blank	blank	censored	1	0	0	0	0	0	0	0	0	0	0	0	1	0	blank	0	0	0	1	1
1403	0	Center_06	555	0	2020-03-22	6	shift	1	2020-03-20	F	0	38	14	14	14	0	0	0	1	1	blank	4.Critical/Fatal	4	1	1	1	blank	blank	censored	1	0	0	0	0	0	0	0	0	0	0	0	1	0	blank	0	0	0	1	1
1404	0	Center_06	555	0	2020-03-22	7	shift	1	2020-03-20	F	0	38	15	16	16	0	0	0	1	1	blank	4.Critical/Fatal	4	1	1	1	blank	blank	censored	1	0	0	0	0	0	0	0	0	0	0	0	1	0	blank	0	0	0	1	1
1405	0	Center_06	555	0	2020-03-22	8	shift	0	2020-03-20	F	0	38	16	16	16	0	0	0	1	1	blank	4.Critical/Fatal	4	1	1	1	blank	blank	censored	1	0	0	0	0	0	0	0	0	0	0	0	1	0	blank	0	0	0	1	1
1406	0	Center_06	555	0	2020-03-22	9	shift	0	2020-03-20	F	0	38	17	18	18	0	0	0	1	1	blank	4.Critical/Fatal	4	1	1	1	blank	blank	censored	1	0	0	0	0	0	0	0	0	0	0	0	1	0	blank	0	0	0	1	1
1407	0	Center_06	555	0	2020-03-22	10	shift	0	2020-03-20	F	0	38	18	18	18	0	0	0	1	1	blank	4.Critical/Fatal	4	1	1	1	blank	blank	censored	1	0	0	0	0	0	0	0	0	0	0	0	1	0	blank	0	0	0	1	1
1408	0	Center_06	555	0	2020-03-22	11	shift	0	2020-03-20	F	0	38	19	20	20	0	0	0	1	1	blank	4.Critical/Fatal	4	1	1	1	blank	blank	censored	1	0	0	0	0	0	0	0	0	0	0	0	1	0	blank	0	0	0	1	1
1409	0	Center_06	555	0	2020-03-22	12	shift	0	2020-03-20	F	0	38	20	20	20	0	0	0	1	1	blank	4.Critical/Fatal	4	1	1	1	blank	blank	censored	1	0	0	0	0	0	0	0	0	0	0	0	1	0	blank	0	0	0	1	1
1410	0	Center_06	556	1	2020-03-21	0	shift	1	2020-03-21	F	0	71	10	10	10	0	0	0	1	1	blank	4.Critical/Fatal	4	1	1	1	blank	blank	censored	1	0	0	1	0	0	0	0	0	0	0	0	0	0	blank	0	0	0	1	1
1411	0	Center_06	556	0	2020-03-21	4	shift	1	2020-03-21	F	0	71	14	14	14	0	0	0	1	1	blank	4.Critical/Fatal	4	1	1	1	blank	blank	censored	1	0	0	1	0	0	0	0	0	0	0	0	0	0	blank	0	0	0	1	1
1412	0	Center_06	556	0	2020-03-21	5	shift	1	2020-03-21	F	0	71	15	16	16	0	0	0	1	1	blank	4.Critical/Fatal	4	1	1	1	blank	blank	censored	1	0	0	1	0	0	0	0	0	0	0	0	0	0	blank	0	0	0	1	1
1413	0	Center_06	556	0	2020-03-21	6	shift	1	2020-03-21	F	0	71	16	16	16	0	0	0	1	1	blank	4.Critical/Fatal	4	1	1	1	blank	blank	censored	1	0	0	1	0	0	0	0	0	0	0	0	0	0	blank	0	0	0	1	1
1414	0	Center_06	556	0	2020-03-21	7	shift	1	2020-03-21	F	0	71	17	18	18	0	0	0	1	1	blank	4.Critical/Fatal	4	1	1	1	blank	blank	censored	1	0	0	1	0	0	0	0	0	0	0	0	0	0	blank	0	0	0	1	1
1415	0	Center_06	556	0	2020-03-21	8	shift	0	2020-03-21	F	0	71	18	18	18	0	0	0	1	1	blank	4.Critical/Fatal	4	1	1	1	blank	blank	censored	1	0	0	1	0	0	0	0	0	0	0	0	0	0	blank	0	0	0	1	1
1416	0	Center_06	556	0	2020-03-21	9	shift	0	2020-03-21	F	0	71	19	20	20	0	0	0	1	1	blank	4.Critical/Fatal	4	1	1	1	blank	blank	censored	1	0	0	1	0	0	0	0	0	0	0	0	0	0	blank	0	0	0	1	1
1417	0	Center_06	556	0	2020-03-21	10	shift	0	2020-03-21	F	0	71	20	20	20	0	0	0	1	1	blank	4.Critical/Fatal	4	1	1	1	blank	blank	censored	1	0	0	1	0	0	0	0	0	0	0	0	0	0	blank	0	0	0	1	1
1418	0	Center_06	556	0	2020-03-21	11	shift	0	2020-03-21	F	0	71	21	22	22	0	0	0	1	1	blank	4.Critical/Fatal	4	1	1	1	blank	blank	censored	1	0	0	1	0	0	0	0	0	0	0	0	0	0	blank	0	0	0	1	1
1419	0	Center_06	556	0	2020-03-21	12	shift	0	2020-03-21	F	0	71	22	22	22	0	0	0	1	1	blank	4.Critical/Fatal	4	1	1	1	blank	blank	censored	1	0	0	1	0	0	0	0	0	0	0	0	0	0	blank	0	0	0	1	1
1420	0	Center_06	556	0	2020-03-21	13	shift	0	2020-03-21	F	0	71	23	24	24	0	0	0	1	1	blank	4.Critical/Fatal	4	1	1	1	blank	blank	censored	1	0	0	1	0	0	0	0	0	0	0	0	0	0	blank	0	0	0	1	1
1421	0	Center_06	557	1	2020-03-25	0	7	1	2020-03-25	M	1	81	6	6	6	1	0	1	0	0	blank	4.Critical/Fatal	5	1	1	1	blank	blank	censored	1	0	0	0	0	0	0	0	1	0	0	0	0	0	blank	0	2020-04-01	1	1	1
1422	0	Center_06	557	0	2020-03-25	2	7	1	2020-03-25	M	1	81	8	8	8	0	0	1	0	0	blank	4.Critical/Fatal	5	1	1	1	blank	blank	censored	1	0	0	0	0	0	0	0	1	0	0	0	0	0	blank	0	2020-04-01	1	1	1
1423	0	Center_06	558	1	2020-03-26	0	14	1	2020-03-26	F	0	40	6	6	6	1	0	0	1	1	blank	4.Critical/Fatal	4	1	1	1	blank	blank	censored	1	0	0	0	0	1	0	0	0	0	0	0	0	0	blank	2020-04-09	0	0	1	1
1424	0	Center_06	558	0	2020-03-26	0	14	1	2020-03-26	F	0	40	6	6	6	1	0	0	1	1	blank	4.Critical/Fatal	4	1	1	1	blank	blank	censored	1	0	0	0	0	1	0	0	0	0	0	0	0	0	blank	2020-04-09	0	0	1	1
1425	0	Center_06	558	0	2020-03-26	1	14	1	2020-03-26	F	0	40	7	7	8	1	0	0	1	1	blank	4.Critical/Fatal	4	1	1	1	blank	blank	censored	1	0	0	0	0	1	0	0	0	0	0	0	0	0	blank	2020-04-09	0	0	1	1
1426	0	Center_06	558	0	2020-03-26	2	14	1	2020-03-26	F	0	40	8	8	8	0	0	0	1	1	blank	4.Critical/Fatal	4	1	1	1	blank	blank	censored	1	0	0	0	0	1	0	0	0	0	0	0	0	0	blank	2020-04-09	0	0	1	1
1427	0	Center_06	558	0	2020-03-26	3	14	1	2020-03-26	F	0	40	9	9	10	0	0	0	1	1	blank	4.Critical/Fatal	4	1	1	1	blank	blank	censored	1	0	0	0	0	1	0	0	0	0	0	0	0	0	blank	2020-04-09	0	0	1	1
1428	0	Center_06	558	0	2020-03-26	4	14	1	2020-03-26	F	0	40	10	10	10	0	0	0	1	1	blank	4.Critical/Fatal	4	1	1	1	blank	blank	censored	1	0	0	0	0	1	0	0	0	0	0	0	0	0	blank	2020-04-09	0	0	1	1
1429	0	Center_06	558	0	2020-03-26	4	14	1	2020-03-26	F	0	40	10	10	10	0	0	0	1	1	blank	4.Critical/Fatal	4	1	1	1	blank	blank	censored	1	0	0	0	0	1	0	0	0	0	0	0	0	0	blank	2020-04-09	0	0	1	1
1430	0	Center_06	558	0	2020-03-26	5	14	1	2020-03-26	F	0	40	11	11	12	0	0	0	1	1	blank	4.Critical/Fatal	4	1	1	1	blank	blank	censored	1	0	0	0	0	1	0	0	0	0	0	0	0	0	blank	2020-04-09	0	0	1	1
1431	0	Center_06	558	0	2020-03-26	6	14	1	2020-03-26	F	0	40	12	12	12	0	0	0	1	1	blank	4.Critical/Fatal	4	1	1	1	blank	blank	censored	1	0	0	0	0	1	0	0	0	0	0	0	0	0	blank	2020-04-09	0	0	1	1
1432	0	Center_06	558	0	2020-03-26	7	14	1	2020-03-26	F	0	40	13	13	14	0	0	0	1	1	blank	4.Critical/Fatal	4	1	1	1	blank	blank	censored	1	0	0	0	0	1	0	0	0	0	0	0	0	0	blank	2020-04-09	0	0	1	1
1433	0	Center_06	558	0	2020-03-26	8	14	0	2020-03-26	F	0	40	14	14	14	0	0	0	1	1	blank	4.Critical/Fatal	4	1	1	1	blank	blank	censored	1	0	0	0	0	1	0	0	0	0	0	0	0	0	blank	2020-04-09	0	0	1	1
1434	0	Center_06	559	1	2020-03-25	0	16	1	2020-03-25	M	1	80	4	4	4	1	0	1	0	1	blank	4.Critical/Fatal	5	1	1	1	blank	blank	0	0	0	0	0	0	0	0	0	0	0	0	0	0	0	blank	0	2020-04-10	1	1	1
1435	0	Center_06	559	0	2020-03-25	0	16	1	2020-03-25	M	1	80	4	4	4	1	0	1	0	1	blank	4.Critical/Fatal	5	1	1	1	blank	blank	0	0	0	0	0	0	0	0	0	0	0	0	0	0	0	blank	0	2020-04-10	1	1	1
1436	0	Center_06	559	0	2020-03-25	2	16	1	2020-03-25	M	1	80	6	6	6	1	0	1	0	1	blank	4.Critical/Fatal	5	1	1	1	blank	blank	0	0	0	0	0	0	0	0	0	0	0	0	0	0	0	blank	0	2020-04-10	1	1	1
1437	0	Center_06	559	0	2020-03-25	2	16	1	2020-03-25	M	1	80	6	6	6	1	0	0	1	1	blank	4.Critical/Fatal	5	1	1	1	blank	blank	0	0	0	0	0	0	0	0	0	0	0	0	0	0	0	blank	0	2020-04-10	1	1	1
1438	0	Center_06	559	0	2020-03-25	3	16	1	2020-03-25	M	1	80	7	7	8	1	0	0	1	1	blank	4.Critical/Fatal	5	1	1	1	blank	blank	0	0	0	0	0	0	0	0	0	0	0	0	0	0	0	blank	0	2020-04-10	1	1	1
1439	0	Center_06	559	0	2020-03-25	4	16	1	2020-03-25	M	1	80	8	8	8	0	0	0	1	1	blank	4.Critical/Fatal	5	1	1	1	blank	blank	0	0	0	0	0	0	0	0	0	0	0	0	0	0	0	blank	0	2020-04-10	1	1	1
1440	0	Center_06	559	0	2020-03-25	5	16	1	2020-03-25	M	1	80	9	9	10	0	0	0	1	1	blank	4.Critical/Fatal	5	1	1	1	blank	blank	0	0	0	0	0	0	0	0	0	0	0	0	0	0	0	blank	0	2020-04-10	1	1	1
1441	0	Center_06	559	0	2020-03-25	6	16	1	2020-03-25	M	1	80	10	10	10	0	0	0	1	1	blank	4.Critical/Fatal	5	1	1	1	blank	blank	0	0	0	0	0	0	0	0	0	0	0	0	0	0	0	blank	0	2020-04-10	1	1	1
1442	0	Center_06	559	0	2020-03-25	7	16	1	2020-03-25	M	1	80	11	11	12	0	0	0	1	1	blank	4.Critical/Fatal	5	1	1	1	blank	blank	0	0	0	0	0	0	0	0	0	0	0	0	0	0	0	blank	0	2020-04-10	1	1	1
1443	0	Center_06	559	0	2020-03-25	8	16	0	2020-03-25	M	1	80	12	12	12	0	0	0	1	1	blank	4.Critical/Fatal	5	1	1	1	blank	blank	0	0	0	0	0	0	0	0	0	0	0	0	0	0	0	blank	0	2020-04-10	1	1	1
1444	0	Center_06	559	0	2020-03-25	9	16	0	2020-03-25	M	1	80	13	13	14	0	0	0	1	1	blank	4.Critical/Fatal	5	1	1	1	blank	blank	0	0	0	0	0	0	0	0	0	0	0	0	0	0	0	blank	0	2020-04-10	1	1	1
1445	0	Center_06	560	1	2020-03-24	0	44	1	2020-03-24	M	1	75	7	7	8	1	0	0	1	1	blank	4.Critical/Fatal	5	1	1	1	blank	blank	censored	1	0	0	0	0	0	0	0	0	0	0	0	1	0	blank	0	1	1	1	1
1446	0	Center_06	560	0	2020-03-24	1	44	1	2020-03-24	M	1	75	8	8	8	0	0	0	1	1	blank	4.Critical/Fatal	5	1	1	1	blank	blank	censored	1	0	0	0	0	0	0	0	0	0	0	0	1	0	blank	0	1	1	1	1
1447	0	Center_06	560	0	2020-03-24	2	44	1	2020-03-24	M	1	75	9	9	10	0	0	0	1	1	blank	4.Critical/Fatal	5	1	1	1	blank	blank	censored	1	0	0	0	0	0	0	0	0	0	0	0	1	0	blank	0	1	1	1	1
1448	0	Center_06	560	0	2020-03-24	3	44	1	2020-03-24	M	1	75	10	10	10	0	0	0	1	1	blank	4.Critical/Fatal	5	1	1	1	blank	blank	censored	1	0	0	0	0	0	0	0	0	0	0	0	1	0	blank	0	1	1	1	1
1449	0	Center_06	560	0	2020-03-24	4	44	1	2020-03-24	M	1	75	11	11	12	0	0	0	1	1	blank	4.Critical/Fatal	5	1	1	1	blank	blank	censored	1	0	0	0	0	0	0	0	0	0	0	0	1	0	blank	0	1	1	1	1
1450	0	Center_06	560	0	2020-03-24	5	44	1	2020-03-24	M	1	75	12	12	12	0	0	0	1	1	blank	4.Critical/Fatal	5	1	1	1	blank	blank	censored	1	0	0	0	0	0	0	0	0	0	0	0	1	0	blank	0	1	1	1	1
1451	0	Center_06	560	0	2020-03-24	6	44	1	2020-03-24	M	1	75	13	13	14	0	0	0	1	1	blank	4.Critical/Fatal	5	1	1	1	blank	blank	censored	1	0	0	0	0	0	0	0	0	0	0	0	1	0	blank	0	1	1	1	1
1452	0	Center_06	560	0	2020-03-24	7	44	1	2020-03-24	M	1	75	14	14	14	0	0	0	1	1	blank	4.Critical/Fatal	5	1	1	1	blank	blank	censored	1	0	0	0	0	0	0	0	0	0	0	0	1	0	blank	0	1	1	1	1
1453	0	Center_06	560	0	2020-03-24	8	44	0	2020-03-24	M	1	75	15	16	16	0	0	0	1	1	blank	4.Critical/Fatal	5	1	1	1	blank	blank	censored	1	0	0	0	0	0	0	0	0	0	0	0	1	0	blank	0	1	1	1	1
1454	0	Center_06	560	0	2020-03-24	9	44	0	2020-03-24	M	1	75	16	16	16	0	0	0	1	1	blank	4.Critical/Fatal	5	1	1	1	blank	blank	censored	1	0	0	0	0	0	0	0	0	0	0	0	1	0	blank	0	1	1	1	1
1455	0	Center_06	560	0	2020-03-24	10	44	0	2020-03-24	M	1	75	17	18	18	0	0	0	1	1	blank	4.Critical/Fatal	5	1	1	1	blank	blank	censored	1	0	0	0	0	0	0	0	0	0	0	0	1	0	blank	0	1	1	1	1
1456	0	Center_06	561	1	2020-03-25	0	8	1	2020-03-25	M	1	73	5	5	6	1	0	1	0	0	blank	3.Severe	3	0	0	1	blank	blank	censored	1	0	0	0	0	0	0	0	0	0	0	0	1	0	blank	2020-04-02	0	0	0	0
1457	0	Center_06	561	0	2020-03-25	1	8	1	2020-03-25	M	1	73	6	6	6	1	0	1	0	0	blank	3.Severe	3	0	0	1	blank	blank	censored	1	0	0	0	0	0	0	0	0	0	0	0	1	0	blank	2020-04-02	0	0	0	0
1458	0	Center_06	561	0	2020-03-25	2	8	1	2020-03-25	M	1	73	7	7	8	1	0	1	0	0	blank	3.Severe	3	0	0	1	blank	blank	censored	1	0	0	0	0	0	0	0	0	0	0	0	1	0	blank	2020-04-02	0	0	0	0
1459	0	Center_06	561	0	2020-03-25	7	8	1	2020-03-25	M	1	73	12	12	12	0	0	1	0	0	blank	3.Severe	3	0	0	1	blank	blank	censored	1	0	0	0	0	0	0	0	0	0	0	0	1	0	blank	2020-04-02	0	0	0	0
1460	0	Center_06	562	1	2020-03-24	0	10	1	2020-03-24	M	1	73	4	4	4	1	0	1	0	0	blank	3.Severe	3	0	0	1	blank	blank	censored	1	0	1	1	0	0	0	0	0	0	0	0	0	0	blank	2020-04-03	0	0	0	0
1461	0	Center_06	562	0	2020-03-24	3	10	1	2020-03-24	M	1	73	7	7	8	1	0	1	0	0	blank	3.Severe	3	0	0	1	blank	blank	censored	1	0	1	1	0	0	0	0	0	0	0	0	0	0	blank	2020-04-03	0	0	0	0
1462	0	Center_06	563	1	2020-03-25	0	9	1	2020-03-25	M	1	59	2	2	2	1	0	1	0	0	blank	3.Severe	3	0	0	1	blank	blank	0	0	0	0	0	0	0	0	0	0	0	0	0	0	0	blank	2020-04-03	0	0	0	0
1463	0	Center_06	563	0	2020-03-25	1	9	1	2020-03-25	M	1	59	3	3	4	1	0	1	0	0	blank	3.Severe	3	0	0	1	blank	blank	0	0	0	0	0	0	0	0	0	0	0	0	0	0	0	blank	2020-04-03	0	0	0	0
1464	0	Center_06	563	0	2020-03-25	2	9	1	2020-03-25	M	1	59	4	4	4	1	0	1	0	0	blank	3.Severe	3	0	0	1	blank	blank	0	0	0	0	0	0	0	0	0	0	0	0	0	0	0	blank	2020-04-03	0	0	0	0
1465	0	Center_06	564	1	2020-03-18	0	7	1	2020-03-23	M	1	26	7	7	8	1	0	1	0	0	blank	3.Severe	3	0	0	1	blank	blank	0	0	0	0	0	0	0	0	0	0	0	0	0	0	0	blank	2020-03-25	0	0	0	0
1466	0	Center_06	564	0	2020-03-18	5	7	1	2020-03-23	M	1	26	12	12	12	0	0	1	0	0	blank	3.Severe	3	0	0	1	blank	blank	0	0	0	0	0	0	0	0	0	0	0	0	0	0	0	blank	2020-03-25	0	0	0	0
1467	0	Center_06	564	0	2020-03-18	7	7	1	2020-03-23	M	1	26	14	14	14	0	0	1	0	0	blank	3.Severe	3	0	0	1	blank	blank	0	0	0	0	0	0	0	0	0	0	0	0	0	0	0	blank	2020-03-25	0	0	0	0
1468	0	Center_06	565	1	2020-03-23	0	7	1	2020-03-23	F	0	63	22	22	22	0	0	1	0	0	blank	3.Severe	3	0	0	1	blank	blank	censored	1	0	0	0	1	0	0	0	0	0	0	0	0	0	blank	2020-03-30	0	0	0	0
1469	0	Center_06	565	0	2020-03-23	2	7	1	2020-03-23	F	0	63	24	24	24	0	0	1	0	0	blank	3.Severe	3	0	0	1	blank	blank	censored	1	0	0	0	1	0	0	0	0	0	0	0	0	0	blank	2020-03-30	0	0	0	0
1470	0	Center_06	565	0	2020-03-23	4	7	1	2020-03-23	F	0	63	26	26	26	0	0	1	0	0	blank	3.Severe	3	0	0	1	blank	blank	censored	1	0	0	0	1	0	0	0	0	0	0	0	0	0	blank	2020-03-30	0	0	0	0
1471	0	Center_06	565	0	2020-03-23	7	7	1	2020-03-23	F	0	63	29	29-46	29-46		0	1	0	0	blank	3.Severe	3	0	0	1	blank	blank	censored	1	0	0	0	1	0	0	0	0	0	0	0	0	0	blank	2020-03-30	0	0	0	0
1472	0	Center_06	566	1	2020-03-23	0	11	1	2020-03-23	F	0	56	5	5	6	1	0	1	0	1	blank	4.Critical/Fatal	5	1	1	1	blank	blank	censored	1	0	0	0	0	1	0	0	1	0	0	0	0	0	blank	0	2020-04-03	1	1	1
1473	0	Center_06	566	0	2020-03-23	2	11	1	2020-03-23	F	0	56	7	7	8	1	0	1	0	1	blank	4.Critical/Fatal	5	1	1	1	blank	blank	censored	1	0	0	0	0	1	0	0	1	0	0	0	0	0	blank	0	2020-04-03	1	1	1
1474	0	Center_06	566	0	2020-03-23	4	11	1	2020-03-23	F	0	56	9	9	10	0	0	0	1	1	blank	4.Critical/Fatal	5	1	1	1	blank	blank	censored	1	0	0	0	0	1	0	0	1	0	0	0	0	0	blank	0	2020-04-03	1	1	1
1475	0	Center_06	566	0	2020-03-23	5	11	1	2020-03-23	F	0	56	10	10	10	0	0	0	1	1	blank	4.Critical/Fatal	5	1	1	1	blank	blank	censored	1	0	0	0	0	1	0	0	1	0	0	0	0	0	blank	0	2020-04-03	1	1	1
1476	0	Center_06	566	0	2020-03-23	5	11	1	2020-03-23	F	0	56	10	10	10	0	0	0	1	1	blank	4.Critical/Fatal	5	1	1	1	blank	blank	censored	1	0	0	0	0	1	0	0	1	0	0	0	0	0	blank	0	2020-04-03	1	1	1
1477	0	Center_06	566	0	2020-03-23	5	11	1	2020-03-23	F	0	56	10	10	10	0	0	0	1	1	blank	4.Critical/Fatal	5	1	1	1	blank	blank	censored	1	0	0	0	0	1	0	0	1	0	0	0	0	0	blank	0	2020-04-03	1	1	1
1478	0	Center_06	566	0	2020-03-23	6	11	1	2020-03-23	F	0	56	11	11	12	0	0	0	1	1	blank	4.Critical/Fatal	5	1	1	1	blank	blank	censored	1	0	0	0	0	1	0	0	1	0	0	0	0	0	blank	0	2020-04-03	1	1	1
1479	0	Center_06	566	0	2020-03-23	7	11	1	2020-03-23	F	0	56	12	12	12	0	0	0	1	1	blank	4.Critical/Fatal	5	1	1	1	blank	blank	censored	1	0	0	0	0	1	0	0	1	0	0	0	0	0	blank	0	2020-04-03	1	1	1
1480	0	Center_06	566	0	2020-03-23	10	11	0	2020-03-23	F	0	56	15	16	16	0	0	0	1	1	blank	4.Critical/Fatal	5	1	1	1	blank	blank	censored	1	0	0	0	0	1	0	0	1	0	0	0	0	0	blank	0	2020-04-03	1	1	1
1481	0	Center_06	566	0	2020-03-23	11	11	0	2020-03-23	F	0	56	16	16	16	0	0	0	1	1	blank	4.Critical/Fatal	5	1	1	1	blank	blank	censored	1	0	0	0	0	1	0	0	1	0	0	0	0	0	blank	0	2020-04-03	1	1	1
1482	0	Center_06	567	1	2020-03-21	0	shift	1	2020-03-22	M	1	63	6	6	6	1	0	0	1	1	blank	4.Critical/Fatal	4	1	1	1	blank	blank	0	0	0	0	0	0	0	0	0	0	0	0	0	0	0	blank	0	0	0	1	1
1483	0	Center_06	567	0	2020-03-21	4	shift	1	2020-03-22	M	1	63	10	10	10	0	0	0	1	1	blank	4.Critical/Fatal	4	1	1	1	blank	blank	0	0	0	0	0	0	0	0	0	0	0	0	0	0	0	blank	0	0	0	1	1
1484	0	Center_06	567	0	2020-03-21	5	shift	1	2020-03-22	M	1	63	11	11	12	0	0	0	1	1	blank	4.Critical/Fatal	4	1	1	1	blank	blank	0	0	0	0	0	0	0	0	0	0	0	0	0	0	0	blank	0	0	0	1	1
1485	0	Center_06	567	0	2020-03-21	6	shift	1	2020-03-22	M	1	63	12	12	12	0	0	0	1	1	blank	4.Critical/Fatal	4	1	1	1	blank	blank	0	0	0	0	0	0	0	0	0	0	0	0	0	0	0	blank	0	0	0	1	1
1486	0	Center_06	567	0	2020-03-21	7	shift	1	2020-03-22	M	1	63	13	13	14	0	0	0	1	1	blank	4.Critical/Fatal	4	1	1	1	blank	blank	0	0	0	0	0	0	0	0	0	0	0	0	0	0	0	blank	0	0	0	1	1
1487	0	Center_06	567	0	2020-03-21	8	shift	0	2020-03-22	M	1	63	14	14	14	0	0	0	1	1	blank	4.Critical/Fatal	4	1	1	1	blank	blank	0	0	0	0	0	0	0	0	0	0	0	0	0	0	0	blank	0	0	0	1	1
1488	0	Center_06	567	0	2020-03-21	9	shift	0	2020-03-22	M	1	63	15	16	16	0	0	0	1	1	blank	4.Critical/Fatal	4	1	1	1	blank	blank	0	0	0	0	0	0	0	0	0	0	0	0	0	0	0	blank	0	0	0	1	1
1489	0	Center_06	567	0	2020-03-21	10	shift	0	2020-03-22	M	1	63	16	16	16	0	0	0	1	1	blank	4.Critical/Fatal	4	1	1	1	blank	blank	0	0	0	0	0	0	0	0	0	0	0	0	0	0	0	blank	0	0	0	1	1
1490	0	Center_06	567	0	2020-03-21	11	shift	0	2020-03-22	M	1	63	17	18	18	0	0	0	1	1	blank	4.Critical/Fatal	4	1	1	1	blank	blank	0	0	0	0	0	0	0	0	0	0	0	0	0	0	0	blank	0	0	0	1	1
1491	0	Center_06	567	0	2020-03-21	12	shift	0	2020-03-22	M	1	63	18	18	18	0	0	0	1	1	blank	4.Critical/Fatal	4	1	1	1	blank	blank	0	0	0	0	0	0	0	0	0	0	0	0	0	0	0	blank	0	0	0	1	1
1492	0	Center_06	567	0	2020-03-21	13	shift	0	2020-03-22	M	1	63	19	20	20	0	0	0	1	1	blank	4.Critical/Fatal	4	1	1	1	blank	blank	0	0	0	0	0	0	0	0	0	0	0	0	0	0	0	blank	0	0	0	1	1
1493	0	Center_06	568	1	2020-04-02	0	15	1	2020-04-02	M	1	62	6	6	6	1	0	1	0	0	blank	3.Severe	3	0	0	1	blank	blank	censored	1	0	0	0	0	0	0	0	0	0	0	0	1	0	blank	2020-04-16	0	0	0	0
1494	0	Center_06	568	0	2020-04-02	1	15	1	2020-04-02	M	1	62	7	7	8	1	0	1	0	0	blank	3.Severe	3	0	0	1	blank	blank	censored	1	0	0	0	0	0	0	0	0	0	0	0	1	0	blank	2020-04-16	0	0	0	0
1495	0	Center_06	569	1	2020-04-02	0	8	1	2020-04-02	M	1	75	7	7	8	1	0	1	0	0	blank	3.Severe	3	0	0	1	blank	blank	censored	1	0	1	0	0	0	0	0	0	0	0	0	0	0	blank	2020-04-10	0	0	0	0
1496	0	Center_06	569	0	2020-04-02	1	8	1	2020-04-02	M	1	75	8	8	8	0	0	1	0	0	blank	3.Severe	3	0	0	1	blank	blank	censored	1	0	1	0	0	0	0	0	0	0	0	0	0	0	blank	2020-04-10	0	0	0	0
1497	0	Center_06	569	0	2020-04-02	1	8	1	2020-04-02	M	1	75	8	8	8	0	0	1	0	0	blank	3.Severe	3	0	0	1	blank	blank	censored	1	0	1	0	0	0	0	0	0	0	0	0	0	0	blank	2020-04-10	0	0	0	0
1498	0	Center_06	570	1	2020-03-31	0	3	1	2020-03-31	M	1	48	14	14	14	0	0	1	0	0	blank	2.Moderate	2	0	0	0	blank	blank	0	0	0	0	0	0	0	0	0	0	0	0	0	0	0	blank	2020-04-03	0	0	0	0
1499	0	Center_06	570	0	2020-03-31	1	3	1	2020-03-31	M	1	48	15	16	16	0	0	1	0	0	blank	2.Moderate	2	0	0	0	blank	blank	0	0	0	0	0	0	0	0	0	0	0	0	0	0	0	blank	2020-04-03	0	0	0	0
1500	0	Center_06	570	0	2020-03-31	3	3	1	2020-03-31	M	1	48	17	18	18	0	0	1	0	0	blank	2.Moderate	2	0	0	0	blank	blank	0	0	0	0	0	0	0	0	0	0	0	0	0	0	0	blank	2020-04-03	0	0	0	0
1501	0	Center_06	571	1	2020-03-31	0	9	1	2020-03-31	F	0	56	9	9	10	0	0	1	0	0	blank	3.Severe	3	0	0	1	blank	blank	censored	1	0	1	0	0	0	0	0	0	1	0	0	0	0	blank	2020-04-09	0	0	0	0
1502	0	Center_06	571	0	2020-03-31	1	9	1	2020-03-31	F	0	56	10	10	10	0	0	1	0	0	blank	3.Severe	3	0	0	1	blank	blank	censored	1	0	1	0	0	0	0	0	0	1	0	0	0	0	blank	2020-04-09	0	0	0	0
1503	0	Center_06	571	0	2020-03-31	2	9	1	2020-03-31	F	0	56	11	11	12	0	0	1	0	0	blank	3.Severe	3	0	0	1	blank	blank	censored	1	0	1	0	0	0	0	0	0	1	0	0	0	0	blank	2020-04-09	0	0	0	0
1504	0	Center_06	571	0	2020-03-31	3	9	1	2020-03-31	F	0	56	12	12	12	0	0	1	0	0	blank	3.Severe	3	0	0	1	blank	blank	censored	1	0	1	0	0	0	0	0	0	1	0	0	0	0	blank	2020-04-09	0	0	0	0
1505	0	Center_06	572	1	2020-03-31	0	9	1	2020-03-31	M	1	69	8	8	8	0	0	1	0	0	blank	4.Critical/Fatal	5	1	1	1	blank	blank	censored	1	0	0	0	0	0	0	0	0	0	0	0	1	0	blank	0	2020-04-09	1	1	1
1506	0	Center_06	572	0	2020-03-31	1	9	1	2020-03-31	M	1	69	9	9	10	0	0	1	0	0	blank	4.Critical/Fatal	5	1	1	1	blank	blank	censored	1	0	0	0	0	0	0	0	0	0	0	0	1	0	blank	0	2020-04-09	1	1	1
1507	0	Center_07	573	1	2020-03-14	4	5	1	2020-03-12	M	1	71	13	13	14	0	0	0	1	1	Wel IC	4.Critical/Fatal	5	1	1	1	blank	blank	0															blank		2020-03-19	1	1	1
1508	0	Center_07	574	1	2020-03-12	2	6	1	2020-03-12	M	1	65	16	16	16	0	0	1	0	0	Geen IC	3.Severe	3	0	0	1	blank	blank	0															blank	2020-03-18	0	0	0	0
1509	0	Center_07	574	0	2020-03-12	4	6	1	2020-03-12	M	1	65	18	18	18	0	0	1	0	0	Geen IC	3.Severe	3	0	0	1	blank	blank	0															blank	2020-03-18	0	0	0	0
1510	0	Center_07	574	0	2020-03-12	6	6	1	2020-03-12	M	1	65	20	20	20	0	0	1	0	0	Geen IC	3.Severe	3	0	0	1	blank	blank	0															blank	2020-03-18	0	0	0	0
1511	0	Center_07	574	0	2020-03-12	11	6	0	2020-03-12	M	1	65	25	26	26	0	0	1	0	0	Geen IC	3.Severe	3	0	0	1	blank	blank	0															blank	2020-03-18	0	0	0	0
1512	0	Center_07	574	0	2020-03-12	13	6	0	2020-03-12	M	1	65	27	28	28	0	0	1	0	0	Geen IC	3.Severe	3	0	0	1	blank	blank	0															blank	2020-03-18	0	0	0	0
1513	0	Center_07	574	0	2020-03-12	15	6	0	2020-03-12	M	1	65	29	29-46	29-46		0	1	0	0	Geen IC	3.Severe	3	0	0	1	blank	blank	0															blank	2020-03-18	0	0	0	0
1514	0	Center_07	574	0	2020-03-12	17	6	0	2020-03-12	M	1	65	31	29-46	29-46		0	1	0	0	Geen IC	3.Severe	3	0	0	1	blank	blank	0															blank	2020-03-18	0	0	0	0
1515	0	Center_07	575	1	2020-03-12	4	4	1	2020-03-12	F	0	65	11	11	12	0	0	1	0	0	Geen IC	2.Moderate	2	0	0	0	blank	blank	0															blank	2020-03-16	0	0	0	0
1516	0	Center_07	576	1	2020-03-06	13	13	0	2020-03-13	M	1	64	8	8	8	0	0	1	0	0	Geen IC	3.Severe	3	0	0	1	blank	blank	0															blank	2020-03-19	0	0	0	0
1517	0	Center_07	577	1	2020-03-13	5	10	1	2020-03-13	M	1	77	9	9	10	0	0	0	1	1	Wel IC	4.Critical/Fatal	5	1	1	1	blank	blank	0															blank		2020-03-23	1	1	1
1518	0	Center_07	577	0	2020-03-13	7	10	1	2020-03-13	M	1	77	11	11	12	0	0	0	1	1	Wel IC	4.Critical/Fatal	5	1	1	1	blank	blank	0															blank		2020-03-23	1	1	1
1519	0	Center_07	577	0	2020-03-13	10	10	0	2020-03-13	M	1	77	14	14	14	0	0	0	1	1	Wel IC	4.Critical/Fatal	5	1	1	1	blank	blank	0															blank		2020-03-23	1	1	1
1520	0	Center_07	578	1	2020-03-14	4	4	1	00/01/1900	F	0	42	12	12	12	0	0	1	0	0	Geen IC	2.Moderate	2	0	0	0	blank	blank	0															blank	2020-03-18	0	0	0	0
1521	0	Center_07	579	1	2020-03-14	5	16	1	00/01/1900	M	1	56	6	6	6	1	0	1	0	0	Geen IC	3.Severe	3	0	0	1	blank	blank	0															blank	2020-03-30	0	0	0	0
1522	0	Center_07	579	0	2020-03-14	9	16	0	00/01/1900	M	1	56	10	10	10	0	0	1	0	0	Geen IC	3.Severe	3	0	0	1	blank	blank	0															blank	2020-03-30	0	0	0	0
1523	0	Center_07	579	0	2020-03-14	11	16	0	00/01/1900	M	1	56	12	12	12	0	0	1	0	0	Geen IC	3.Severe	3	0	0	1	blank	blank	0															blank	2020-03-30	0	0	0	0
1524	0	Center_07	579	0	2020-03-14	13	16	0	00/01/1900	M	1	56	14	14	14	0	0	1	0	0	Geen IC	3.Severe	3	0	0	1	blank	blank	0															blank	2020-03-30	0	0	0	0
1525	0	Center_07	579	0	2020-03-14	16	16	0	00/01/1900	M	1	56	17	18	18	0	0	1	0	0	Geen IC	3.Severe	3	0	0	1	blank	blank	0															blank	2020-03-30	0	0	0	0
1526	0	Center_07	580	1	2020-03-15	0	5	1	2020-03-15	M	1	86	7	7	8	1	0	1	0	0	Geen IC	4.Critical/Fatal	5	1	1	1	blank	blank	0															blank		2020-03-20	1	1	1
1527	0	Center_07	580	0	2020-03-15	5	5	1	2020-03-15	M	1	86	12	12	12	0	0	1	0	0	Geen IC	4.Critical/Fatal	5	1	1	1	blank	blank	0															blank		2020-03-20	1	1	1
1528	0	Center_07	581	1	2020-03-16	2	14	1	2020-03-16	M	1	78	9	9	10	0	0	0	1	1	Wel IC	4.Critical/Fatal	5	1	1	1	blank	blank	0															blank		2020-03-30	1	1	1
1529	0	Center_07	581	0	2020-03-16	4	14	1	2020-03-16	M	1	78	11	11	12	0	0	0	1	1	Wel IC	4.Critical/Fatal	5	1	1	1	blank	blank	0															blank		2020-03-30	1	1	1
1530	0	Center_07	581	0	2020-03-16	7	14	1	2020-03-16	M	1	78	14	14	14	0	0	0	1	1	Wel IC	4.Critical/Fatal	5	1	1	1	blank	blank	0															blank		2020-03-30	1	1	1
1531	0	Center_07	581	0	2020-03-16	9	14	0	2020-03-16	M	1	78	16	16	16	0	0	0	1	1	Wel IC	4.Critical/Fatal	5	1	1	1	blank	blank	0															blank		2020-03-30	1	1	1
1532	0	Center_07	581	0	2020-03-16	11	14	0	2020-03-16	M	1	78	18	18	18	0	0	0	1	1	Wel IC	4.Critical/Fatal	5	1	1	1	blank	blank	0															blank		2020-03-30	1	1	1
1533	0	Center_07	581	0	2020-03-16	14	14	0	2020-03-16	M	1	78	21	22	22	0	0	0	1	1	Wel IC	4.Critical/Fatal	5	1	1	1	blank	blank	0															blank		2020-03-30	1	1	1
1534	0	Center_07	582	1	2020-03-13	1	8	1	2020-03-17	F	0	77	14	14	14	0	0	1	0	0	Wel IC	4.Critical/Fatal	5	1	1	1	blank	blank	0															blank		2020-03-21	1	1	1
1535	0	Center_07	582	0	2020-03-13	3	8	1	2020-03-17	F	0	77	16	16	16	0	0	1	0	0	Wel IC	4.Critical/Fatal	5	1	1	1	blank	blank	0															blank		2020-03-21	1	1	1
1536	0	Center_07	582	0	2020-03-13	4	8	1	2020-03-17	F	0	77	17	18	18	0	0	1	0	0	Wel IC	4.Critical/Fatal	5	1	1	1	blank	blank	0															blank		2020-03-21	1	1	1
1537	0	Center_07	582	0	2020-03-13	6	8	1	2020-03-17	F	0	77	19	20	20	0	0	1	0	0	Wel IC	4.Critical/Fatal	5	1	1	1	blank	blank	0															blank		2020-03-21	1	1	1
1538	0	Center_07	582	0	2020-03-13	8	8	0	2020-03-17	F	0	77	21	22	22	0	0	1	0	0	Wel IC	4.Critical/Fatal	5	1	1	1	blank	blank	0															blank		2020-03-21	1	1	1
1539	0	Center_07	583	1	2020-03-15	1	15	1	00/01/1900	F	0	66	3	3	4	1	0	0	1	1	Wel IC	4.Critical/Fatal	5	1	1	1	blank	blank	0															blank		2020-03-30	1	1	1
1540	0	Center_07	583	0	2020-03-15	2	15	1	00/01/1900	F	0	66	4	4	4	1	0	0	1	1	Wel IC	4.Critical/Fatal	5	1	1	1	blank	blank	0															blank		2020-03-30	1	1	1
1541	0	Center_07	583	0	2020-03-15	3	15	1	00/01/1900	F	0	66	5	5	6	1	0	0	1	1	Wel IC	4.Critical/Fatal	5	1	1	1	blank	blank	0															blank		2020-03-30	1	1	1
1542	0	Center_07	583	0	2020-03-15	5	15	1	00/01/1900	F	0	66	7	7	8	1	0	0	1	1	Wel IC	4.Critical/Fatal	5	1	1	1	blank	blank	0															blank		2020-03-30	1	1	1
1543	0	Center_07	583	0	2020-03-15	8	15	0	00/01/1900	F	0	66	10	10	10	0	0	0	1	1	Wel IC	4.Critical/Fatal	5	1	1	1	blank	blank	0															blank		2020-03-30	1	1	1
1544	0	Center_07	583	0	2020-03-15	10	15	0	00/01/1900	F	0	66	12	12	12	0	0	0	1	1	Wel IC	4.Critical/Fatal	5	1	1	1	blank	blank	0															blank		2020-03-30	1	1	1
1545	0	Center_07	583	0	2020-03-15	10	15	0	00/01/1900	F	0	66	12	12	12	0	0	0	1	1	Wel IC	4.Critical/Fatal	5	1	1	1	blank	blank	0															blank		2020-03-30	1	1	1
1546	0	Center_07	583	0	2020-03-15	12	15	0	00/01/1900	F	0	66	14	14	14	0	0	0	1	1	Wel IC	4.Critical/Fatal	5	1	1	1	blank	blank	0															blank		2020-03-30	1	1	1
1547	0	Center_07	583	0	2020-03-15	15	15	0	00/01/1900	F	0	66	17	18	18	0	0	0	1	1	Wel IC	4.Critical/Fatal	5	1	1	1	blank	blank	0															blank		2020-03-30	1	1	1
1548	0	Center_07	584	1	2020-03-17	1	13	1	2020-03-17	F	0	46	7	7	8	1	0	1	0	0	Wel IC	3.Severe	3	0	0	1	blank	blank	0															blank	2020-03-30	0	0	0	0
1549	0	Center_07	584	0	2020-03-17	6	13	1	2020-03-17	F	0	46	12	12	12	0	0	1	0	0	Wel IC	3.Severe	3	0	0	1	blank	blank	0															blank	2020-03-30	0	0	0	0
1550	0	Center_07	584	0	2020-03-17	9	13	0	2020-03-17	F	0	46	15	16	16	0	0	1	0	0	Wel IC	3.Severe	3	0	0	1	blank	blank	0															blank	2020-03-30	0	0	0	0
1551	0	Center_07	584	0	2020-03-17	13	13	0	2020-03-17	F	0	46	19	20	20	0	0	1	0	0	Wel IC	3.Severe	3	0	0	1	blank	blank	0															blank	2020-03-30	0	0	0	0
1552	0	Center_07	585	1	2020-03-17	1	5	1	00/01/1900	M	1	90	7	7	8	1	0	1	0	0	Geen IC	2.Moderate	2	0	0	0	blank	blank	0															blank	2020-03-22	0	0	0	0
1553	0	Center_07	585	0	2020-03-17	3	5	1	00/01/1900	M	1	90	9	9	10	0	0	1	0	0	Geen IC	2.Moderate	2	0	0	0	blank	blank	0															blank	2020-03-22	0	0	0	0
1554	0	Center_07	585	0	2020-03-17	5	5	1	00/01/1900	M	1	90	11	11	12	0	0	1	0	0	Geen IC	2.Moderate	2	0	0	0	blank	blank	0															blank	2020-03-22	0	0	0	0
1555	0	Center_07	586	1	2020-03-18	0	2	1	2020-03-18	F	0	82	2	2	2	1	0	1	0	0	Geen IC	2.Moderate	2	0	0	0	blank	blank	0															blank	2020-03-20	0	0	0	0
1556	0	Center_07	586	0	2020-03-18	2	2	1	2020-03-18	F	0	82	4	4	4	1	0	1	0	0	Geen IC	2.Moderate	2	0	0	0	blank	blank	0															blank	2020-03-20	0	0	0	0
1557	0	Center_07	587	1	2020-03-18	0	30	1	2020-03-26	F	0	67	10	10	10	0	0	0	1	1	Wel IC	4.Critical/Fatal	4	1	1	1	blank	blank	0															blank	not yet	0	0	1	1
1558	0	Center_07	587	0	2020-03-18	2	30	1	2020-03-26	F	0	67	12	12	12	0	0	0	1	1	Wel IC	4.Critical/Fatal	4	1	1	1	blank	blank	0															blank	not yet	0	0	1	1
1559	0	Center_07	587	0	2020-03-18	4	30	1	2020-03-26	F	0	67	14	14	14	0	0	0	1	1	Wel IC	4.Critical/Fatal	4	1	1	1	blank	blank	0															blank	not yet	0	0	1	1
1560	0	Center_07	587	0	2020-03-18	5	30	1	2020-03-26	F	0	67	15	16	16	0	0	0	1	1	Wel IC	4.Critical/Fatal	4	1	1	1	blank	blank	0															blank	not yet	0	0	1	1
1561	0	Center_07	587	0	2020-03-18	7	30	1	2020-03-26	F	0	67	17	18	18	0	0	0	1	1	Wel IC	4.Critical/Fatal	4	1	1	1	blank	blank	0															blank	not yet	0	0	1	1
1562	0	Center_07	587	0	2020-03-18	9	30	0	2020-03-26	F	0	67	19	20	20	0	0	0	1	1	Wel IC	4.Critical/Fatal	4	1	1	1	blank	blank	0															blank	not yet	0	0	1	1
1563	0	Center_07	587	0	2020-03-18	12	30	0	2020-03-26	F	0	67	22	22	22	0	0	0	1	1	Wel IC	4.Critical/Fatal	4	1	1	1	blank	blank	0															blank	not yet	0	0	1	1
1564	0	Center_07	588	1	2020-03-18	1	3	1	2020-03-18	F	0	81	11	11	12	0	0	1	0	0	Geen IC	2.Moderate	2	0	0	0	blank	blank	0															blank	2020-03-21	0	0	0	0
1565	0	Center_07	588	0	2020-03-18	3	3	1	2020-03-18	F	0	81	13	13	14	0	0	1	0	0	Geen IC	2.Moderate	2	0	0	0	blank	blank	0															blank	2020-03-21	0	0	0	0
1566	0	Center_07	589	1	2020-03-17	1	3	1	00/01/1900	F	0	74	9	9	10	0	0	1	0	0	Geen IC	2.Moderate	2	0	0	0	blank	blank	0															blank	2020-03-20	0	0	0	0
1567	0	Center_07	589	0	2020-03-17	3	3	1	00/01/1900	F	0	74	11	11	12	0	0	1	0	0	Geen IC	2.Moderate	2	0	0	0	blank	blank	0															blank	2020-03-20	0	0	0	0
1568	0	Center_07	590	1	2020-03-13	1	7	1	2020-03-13	F	0	76	4	4	4	1	0	1	0	0	Geen IC	3.Severe	3	0	0	1	blank	blank	0															blank	2020-03-20	0	0	0	0
1569	0	Center_07	590	0	2020-03-13	2	7	1	2020-03-13	F	0	76	5	5	6	1	0	1	0	0	Geen IC	3.Severe	3	0	0	1	blank	blank	0															blank	2020-03-20	0	0	0	0
1570	0	Center_07	590	0	2020-03-13	5	7	1	2020-03-13	F	0	76	8	8	8	0	0	1	0	0	Geen IC	3.Severe	3	0	0	1	blank	blank	0															blank	2020-03-20	0	0	0	0
1571	0	Center_07	590	0	2020-03-13	7	7	1	2020-03-13	F	0	76	10	10	10	0	0	1	0	0	Geen IC	3.Severe	3	0	0	1	blank	blank	0															blank	2020-03-20	0	0	0	0
1572	0	Center_07	591	1	2020-03-18	0	4	1	2020-03-18	M	1	53	9	9	10	0	0	1	0	0	Geen IC	2.Moderate	2	0	0	0	blank	blank	0															blank	2020-03-22	0	0	0	0
1573	0	Center_07	591	0	2020-03-18	1	4	1	2020-03-18	M	1	53	10	10	10	0	0	1	0	0	Geen IC	2.Moderate	2	0	0	0	blank	blank	0															blank	2020-03-22	0	0	0	0
1574	0	Center_07	591	0	2020-03-18	2	4	1	2020-03-18	M	1	53	11	11	12	0	0	1	0	0	Geen IC	2.Moderate	2	0	0	0	blank	blank	0															blank	2020-03-22	0	0	0	0
1575	0	Center_07	591	0	2020-03-18	4	4	1	2020-03-18	M	1	53	13	13	14	0	0	1	0	0	Geen IC	2.Moderate	2	0	0	0	blank	blank	0															blank	2020-03-22	0	0	0	0
1576	0	Center_07	592	1	2020-03-18	0	11	1	00/01/1900	M	1	68	6	6	6	1	0	1	0	0	Geen IC	3.Severe	3	0	0	1	blank	blank	0															blank	2020-03-29	0	0	0	0
1577	0	Center_07	592	0	2020-03-18	5	11	1	00/01/1900	M	1	68	11	11	12	0	0	1	0	0	Geen IC	3.Severe	3	0	0	1	blank	blank	0															blank	2020-03-29	0	0	0	0
1578	0	Center_07	592	0	2020-03-18	7	11	1	00/01/1900	M	1	68	13	13	14	0	0	1	0	0	Geen IC	3.Severe	3	0	0	1	blank	blank	0															blank	2020-03-29	0	0	0	0
1579	0	Center_07	592	0	2020-03-18	9	11	0	00/01/1900	M	1	68	15	16	16	0	0	1	0	0	Geen IC	3.Severe	3	0	0	1	blank	blank	0															blank	2020-03-29	0	0	0	0
1580	0	Center_07	592	0	2020-03-18	11	11	0	00/01/1900	M	1	68	17	18	18	0	0	1	0	0	Geen IC	3.Severe	3	0	0	1	blank	blank	0															blank	2020-03-29	0	0	0	0
1581	0	Center_07	593	1	2020-03-17	0	3	1	2020-03-17	M	1	77	1	1	2	1	0	1	0	0	0	2.Moderate	2	0	0	0	blank	blank	0															blank	2020-03-20	0	0	0	0
1582	0	Center_07	593	0	2020-03-17	3	3	1	2020-03-17	M	1	77	4	4	4	1	0	1	0	0	Geen IC	2.Moderate	2	0	0	0	blank	blank	0															blank	2020-03-20	0	0	0	0
1583	0	Center_07	594	1	2020-03-18	1	23	1	2020-03-18	M	1	74	1	1	2	1	0	0	1	1	Wel IC	4.Critical/Fatal	5	1	1	1	blank	blank	0															blank		2020-04-10	1	1	1
1584	0	Center_07	594	0	2020-03-18	2	23	1	2020-03-18	M	1	74	2	2	2	1	0	0	1	1	Wel IC	4.Critical/Fatal	5	1	1	1	blank	blank	0															blank		2020-04-10	1	1	1
1585	0	Center_07	594	0	2020-03-18	5	23	1	2020-03-18	M	1	74	5	5	6	1	0	0	1	1	Wel IC	4.Critical/Fatal	5	1	1	1	blank	blank	0															blank		2020-04-10	1	1	1
1586	0	Center_07	594	0	2020-03-18	5	23	1	2020-03-18	M	1	74	5	5	6	1	0	0	1	1	Wel IC	4.Critical/Fatal	5	1	1	1	blank	blank	0															blank		2020-04-10	1	1	1
1587	0	Center_07	594	0	2020-03-18	7	23	1	2020-03-18	M	1	74	7	7	8	1	0	0	1	1	Wel IC	4.Critical/Fatal	5	1	1	1	blank	blank	0															blank		2020-04-10	1	1	1
1588	0	Center_07	594	0	2020-03-18	9	23	0	2020-03-18	M	1	74	9	9	10	0	0	0	1	1	Wel IC	4.Critical/Fatal	5	1	1	1	blank	blank	0															blank		2020-04-10	1	1	1
1589	0	Center_07	594	0	2020-03-18	12	23	0	2020-03-18	M	1	74	12	12	12	0	0	0	1	1	Wel IC	4.Critical/Fatal	5	1	1	1	blank	blank	0															blank		2020-04-10	1	1	1
1590	0	Center_07	595	1	2020-03-18	0	2	1	2020-03-18	M	1	81	6	6	6	1	0	1	0	0	Geen IC	2.Moderate	2	0	0	0	blank	blank	0															blank	2020-03-20	0	0	0	0
1591	0	Center_07	595	0	2020-03-18	2	2	1	2020-03-18	M	1	81	8	8	8	0	0	1	0	0	Geen IC	2.Moderate	2	0	0	0	blank	blank	0															blank	2020-03-20	0	0	0	0
1592	0	Center_07	596	1	2020-03-11	0	9	1	2020-03-18	M	1	79	1	1	2	1	0	1	0	0	Geen IC	3.Severe	3	0	0	1	blank	blank	0															blank	2020-03-20	0	0	0	0
1593	0	Center_07	596	0	2020-03-11	8	9	0	2020-03-18	M	1	79	9	9	10	0	0	1	0	0	Geen IC	3.Severe	3	0	0	1	blank	blank	0															blank	2020-03-20	0	0	0	0
1594	0	Center_07	596	0	2020-03-11	9	9	0	2020-03-18	M	1	79	10	10	10	0	0	1	0	0	Geen IC	3.Severe	3	0	0	1	blank	blank	0															blank	2020-03-20	0	0	0	0
1595	0	Center_07	597	1	2020-03-18	0	2	1	2020-03-18	F	0	85	10	10	10	0	0	1	0	0	Geen IC	4.Critical/Fatal	5	1	1	1	blank	blank	0															blank		2020-03-20	1	1	1
1596	0	Center_07	597	0	2020-03-18	2	2	1	2020-03-18	F	0	85	12	12	12	0	0	1	0	0	Geen IC	4.Critical/Fatal	5	1	1	1	blank	blank	0															blank		2020-03-20	1	1	1
1597	0	Center_07	598	1	2020-03-18	0	2	1	2020-03-18	F	0	83	7	7	8	1	0	1	0	0	Geen IC	2.Moderate	2	0	0	0	blank	blank	0															blank	2020-03-20	0	0	0	0
1598	0	Center_07	598	0	2020-03-18	2	2	1	2020-03-18	F	0	83	9	9	10	0	0	1	0	0	Geen IC	2.Moderate	2	0	0	0	blank	blank	0															blank	2020-03-20	0	0	0	0
1599	0	Center_07	599	1	2020-03-18	0	11	1	2020-03-18	F	0	69	11	11	12	0	0	1	0	0	Geen IC	3.Severe	3	0	0	1	blank	blank	0															blank	2020-03-29	0	0	0	0
1600	0	Center_07	599	0	2020-03-18	1	11	1	2020-03-18	F	0	69	12	12	12	0	0	1	0	0	Geen IC	3.Severe	3	0	0	1	blank	blank	0															blank	2020-03-29	0	0	0	0
1601	0	Center_07	599	0	2020-03-18	2	11	1	2020-03-18	F	0	69	13	13	14	0	0	1	0	0	Geen IC	3.Severe	3	0	0	1	blank	blank	0															blank	2020-03-29	0	0	0	0
1602	0	Center_07	599	0	2020-03-18	4	11	1	2020-03-18	F	0	69	15	16	16	0	0	1	0	0	Geen IC	3.Severe	3	0	0	1	blank	blank	0															blank	2020-03-29	0	0	0	0
1603	0	Center_07	599	0	2020-03-18	6	11	1	2020-03-18	F	0	69	17	18	18	0	0	1	0	0	Geen IC	3.Severe	3	0	0	1	blank	blank	0															blank	2020-03-29	0	0	0	0
1604	0	Center_07	599	0	2020-03-18	8	11	0	2020-03-18	F	0	69	19	20	20	0	0	1	0	0	Geen IC	3.Severe	3	0	0	1	blank	blank	0															blank	2020-03-29	0	0	0	0
1605	0	Center_07	599	0	2020-03-18	9	11	0	2020-03-18	F	0	69	20	20	20	0	0	1	0	0	Geen IC	3.Severe	3	0	0	1	blank	blank	0															blank	2020-03-29	0	0	0	0
1606	0	Center_07	599	0	2020-03-18	11	11	0	2020-03-18	F	0	69	22	22	22	0	0	1	0	0	Geen IC	3.Severe	3	0	0	1	blank	blank	0															blank	2020-03-29	0	0	0	0
1607	0	Center_07	600	1	2020-03-18	0	3	1	2020-03-18	F	0	68	14	14	14	0	0	1	0	0	Geen IC	2.Moderate	2	0	0	0	blank	blank	0															blank	2020-03-21	0	0	0	0
1608	0	Center_07	600	0	2020-03-18	1	3	1	2020-03-18	F	0	68	15	16	16	0	0	1	0	0	Geen IC	2.Moderate	2	0	0	0	blank	blank	0															blank	2020-03-21	0	0	0	0
1609	0	Center_07	600	0	2020-03-18	3	3	1	2020-03-18	F	0	68	17	18	18	0	0	1	0	0	Geen IC	2.Moderate	2	0	0	0	blank	blank	0															blank	2020-03-21	0	0	0	0
1610	0	Center_07	601	1	2020-03-18	0	4	1	00/01/1900	F	0	42	14	14	14	0	0	1	0	0	Geen IC	2.Moderate	2	0	0	0	blank	blank	0															blank	2020-03-22	0	0	0	0
1611	0	Center_07	601	0	2020-03-18	2	4	1	00/01/1900	F	0	42	16	16	16	0	0	1	0	0	Geen IC	2.Moderate	2	0	0	0	blank	blank	0															blank	2020-03-22	0	0	0	0
1612	0	Center_07	601	0	2020-03-18	4	4	1	00/01/1900	F	0	42	18	18	18	0	0	1	0	0	Geen IC	2.Moderate	2	0	0	0	blank	blank	0															blank	2020-03-22	0	0	0	0
1613	0	Center_07	602	1	2020-03-19	1	10	1	2020-03-16	M	1	69	29	29-46	29-46		0	1	0	0	Geen IC	3.Severe	3	0	0	1	blank	blank	0															blank	2020-03-29	0	0	0	0
1614	0	Center_07	602	0	2020-03-19	3	10	1	2020-03-16	M	1	69	31	29-46	29-46		0	1	0	0	Geen IC	3.Severe	3	0	0	1	blank	blank	0															blank	2020-03-29	0	0	0	0
1615	0	Center_07	602	0	2020-03-19	4	10	1	2020-03-16	M	1	69	32	29-46	29-46		0	1	0	0	Geen IC	3.Severe	3	0	0	1	blank	blank	0															blank	2020-03-29	0	0	0	0
1616	0	Center_07	602	0	2020-03-19	6	10	1	2020-03-16	M	1	69	34	29-46	29-46		0	1	0	0	Geen IC	3.Severe	3	0	0	1	blank	blank	0															blank	2020-03-29	0	0	0	0
1617	0	Center_07	602	0	2020-03-19	8	10	0	2020-03-16	M	1	69	36	29-46	29-46		0	1	0	0	Geen IC	3.Severe	3	0	0	1	blank	blank	0															blank	2020-03-29	0	0	0	0
1618	0	Center_07	602	0	2020-03-19	10	10	0	2020-03-16	M	1	69	38	29-46	29-46		0	1	0	0	Geen IC	3.Severe	3	0	0	1	blank	blank	0															blank	2020-03-29	0	0	0	0
1619	0	Center_07	603	1	2020-03-19	2	30	1	2020-03-19	M	1	47	8	8	8	0	0	0	1	1	Wel IC	4.Critical/Fatal	4	1	1	1	blank	blank	0															blank	not yet	0	0	1	1
1620	0	Center_07	603	0	2020-03-19	4	30	1	2020-03-19	M	1	47	10	10	10	0	0	0	1	1	Wel IC	4.Critical/Fatal	4	1	1	1	blank	blank	0															blank	not yet	0	0	1	1
1621	0	Center_07	603	0	2020-03-19	6	30	1	2020-03-19	M	1	47	12	12	12	0	0	0	1	1	Wel IC	4.Critical/Fatal	4	1	1	1	blank	blank	0															blank	not yet	0	0	1	1
1622	0	Center_07	603	0	2020-03-19	7	30	1	2020-03-19	M	1	47	13	13	14	0	0	0	1	1	Wel IC	4.Critical/Fatal	4	1	1	1	blank	blank	0															blank	not yet	0	0	1	1
1623	0	Center_07	603	0	2020-03-19	8	30	0	2020-03-19	M	1	47	14	14	14	0	0	0	1	1	Wel IC	4.Critical/Fatal	4	1	1	1	blank	blank	0															blank	not yet	0	0	1	1
1624	0	Center_07	603	0	2020-03-19	9	30	0	2020-03-19	M	1	47	15	16	16	0	0	0	1	1	Wel IC	4.Critical/Fatal	4	1	1	1	blank	blank	0															blank	not yet	0	0	1	1
1625	0	Center_07	603	0	2020-03-19	10	30	0	2020-03-19	M	1	47	16	16	16	0	0	0	1	1	Wel IC	4.Critical/Fatal	4	1	1	1	blank	blank	0															blank	not yet	0	0	1	1
1626	0	Center_07	603	0	2020-03-19	11	30	0	2020-03-19	M	1	47	17	18	18	0	0	0	1	1	Wel IC	4.Critical/Fatal	4	1	1	1	blank	blank	0															blank	not yet	0	0	1	1
1627	0	Center_07	604	1	2020-03-20	0	19	1	2020-03-20	M	1	65	7	7	8	1	0	0	1	1	Wel IC	4.Critical/Fatal	4	1	1	1	blank	blank	0															blank	2020-04-08	0	0	1	1
1628	0	Center_07	604	0	2020-03-20	3	19	1	2020-03-20	M	1	65	10	10	10	0	0	0	1	1	Wel IC	4.Critical/Fatal	4	1	1	1	blank	blank	0															blank	2020-04-08	0	0	1	1
1629	0	Center_07	604	0	2020-03-20	5	19	1	2020-03-20	M	1	65	12	12	12	0	0	0	1	1	Wel IC	4.Critical/Fatal	4	1	1	1	blank	blank	0															blank	2020-04-08	0	0	1	1
1630	0	Center_07	604	0	2020-03-20	7	19	1	2020-03-20	M	1	65	14	14	14	0	0	0	1	1	Wel IC	4.Critical/Fatal	4	1	1	1	blank	blank	0															blank	2020-04-08	0	0	1	1
1631	0	Center_07	605	1	2020-03-19	1	9	1	2020-03-19	M	1	76	6	6	6	1	0	1	0	0	Geen IC	4.Critical/Fatal	5	1	1	1	blank	blank	0															blank		2020-03-28	1	1	1
1632	0	Center_07	605	0	2020-03-19	4	9	1	2020-03-19	M	1	76	9	9	10	0	0	1	0	0	Geen IC	4.Critical/Fatal	5	1	1	1	blank	blank	0															blank		2020-03-28	1	1	1
1633	0	Center_07	605	0	2020-03-19	7	9	1	2020-03-19	M	1	76	12	12	12	0	0	1	0	0	Geen IC	4.Critical/Fatal	5	1	1	1	blank	blank	0															blank		2020-03-28	1	1	1
1634	0	Center_07	605	0	2020-03-19	9	9	0	2020-03-19	M	1	76	14	14	14	0	0	1	0	0	Geen IC	4.Critical/Fatal	5	1	1	1	blank	blank	0															blank		2020-03-28	1	1	1
1635	0	Center_07	606	1	2020-03-20	1	2	1	2020-03-20	F	0	78	8	8	8	0	0	1	0	0	Geen IC	2.Moderate	2	0	0	0	blank	blank	0															blank	2020-03-22	0	0	0	0
1636	0	Center_07	606	0	2020-03-20	2	2	1	2020-03-20	F	0	78	9	9	10	0	0	1	0	0	Geen IC	2.Moderate	2	0	0	0	blank	blank	0															blank	2020-03-22	0	0	0	0
1637	0	Center_07	607	1	2020-03-20	0	10	1	2020-03-20	M	1	70	4	4	4	1	0	1	0	0	Geen IC	3.Severe	3	0	0	1	blank	blank	0															blank	2020-03-30	0	0	0	0
1638	0	Center_07	607	0	2020-03-20	1	10	1	2020-03-20	M	1	70	5	5	6	1	0	1	0	0	Geen IC	3.Severe	3	0	0	1	blank	blank	0															blank	2020-03-30	0	0	0	0
1639	0	Center_07	607	0	2020-03-20	2	10	1	2020-03-20	M	1	70	6	6	6	1	0	1	0	0	Geen IC	3.Severe	3	0	0	1	blank	blank	0															blank	2020-03-30	0	0	0	0
1640	0	Center_07	607	0	2020-03-20	4	10	1	2020-03-20	M	1	70	8	8	8	0	0	1	0	0	Geen IC	3.Severe	3	0	0	1	blank	blank	0															blank	2020-03-30	0	0	0	0
1641	0	Center_07	607	0	2020-03-20	6	10	1	2020-03-20	M	1	70	10	10	10	0	0	1	0	0	Geen IC	3.Severe	3	0	0	1	blank	blank	0															blank	2020-03-30	0	0	0	0
1642	0	Center_07	607	0	2020-03-20	8	10	0	2020-03-20	M	1	70	12	12	12	0	0	1	0	0	Geen IC	3.Severe	3	0	0	1	blank	blank	0															blank	2020-03-30	0	0	0	0
1643	0	Center_07	608	1	2020-03-21	0	4	1	2020-03-21	M	1	73	5	5	6	1	0	1	0	0	Geen IC	4.Critical/Fatal	5	1	1	1	blank	blank	0															blank		2020-03-25	1	1	1
1644	0	Center_07	608	0	2020-03-21	2	4	1	2020-03-21	M	1	73	7	7	8	1	0	1	0	0	Geen IC	4.Critical/Fatal	5	1	1	1	blank	blank	0															blank		2020-03-25	1	1	1
1645	0	Center_07	608	0	2020-03-21	4	4	1	2020-03-21	M	1	73	9	9	10	0	0	1	0	0	Geen IC	4.Critical/Fatal	5	1	1	1	blank	blank	0															blank		2020-03-25	1	1	1
1646	0	Center_07	609	1	2020-03-20	0	5	1	2020-03-20	F	0	70	14	14	14	0	0	0	1	1	Wel IC	4.Critical/Fatal	4	1	1	1	blank	blank	0															blank	2020-03-25	0	0	1	1
1647	0	Center_07	609	0	2020-03-20	1	5	1	2020-03-20	F	0	70	15	16	16	0	0	0	1	1	Wel IC	4.Critical/Fatal	4	1	1	1	blank	blank	0															blank	2020-03-25	0	0	1	1
1648	0	Center_07	609	0	2020-03-20	3	5	1	2020-03-20	F	0	70	17	18	18	0	0	0	1	1	Wel IC	4.Critical/Fatal	4	1	1	1	blank	blank	0															blank	2020-03-25	0	0	1	1
1649	0	Center_07	609	0	2020-03-20	5	5	1	2020-03-20	F	0	70	19	20	20	0	0	0	1	1	Wel IC	4.Critical/Fatal	4	1	1	1	blank	blank	0															blank	2020-03-25	0	0	1	1
1650	0	Center_07	609	0	2020-03-20	5	5	1	2020-03-20	F	0	70	19	20	20	0	0	0	1	1	Wel IC	4.Critical/Fatal	4	1	1	1	blank	blank	0															blank	2020-03-25	0	0	1	1
1651	0	Center_07	610	1	2020-03-20	0	15	1	2020-03-20	F	0	69	7	7	8	1	0	0	1	1	Wel IC	4.Critical/Fatal	4	1	1	1	blank	blank	0															blank	2020-04-04	0	0	1	1
1652	0	Center_07	610	0	2020-03-20	2	15	1	2020-03-20	F	0	69	9	9	10	0	0	0	1	1	Wel IC	4.Critical/Fatal	4	1	1	1	blank	blank	0															blank	2020-04-04	0	0	1	1
1653	0	Center_07	610	0	2020-03-20	4	15	1	2020-03-20	F	0	69	11	11	12	0	0	0	1	1	Wel IC	4.Critical/Fatal	4	1	1	1	blank	blank	0															blank	2020-04-04	0	0	1	1
1654	0	Center_07	610	0	2020-03-20	5	15	1	2020-03-20	F	0	69	12	12	12	0	0	0	1	1	Wel IC	4.Critical/Fatal	4	1	1	1	blank	blank	0															blank	2020-04-04	0	0	1	1
1655	0	Center_07	610	0	2020-03-20	7	15	1	2020-03-20	F	0	69	14	14	14	0	0	0	1	1	Wel IC	4.Critical/Fatal	4	1	1	1	blank	blank	0															blank	2020-04-04	0	0	1	1
1656	0	Center_07	610	0	2020-03-20	10	15	0	2020-03-20	F	0	69	17	18	18	0	0	0	1	1	Wel IC	4.Critical/Fatal	4	1	1	1	blank	blank	0															blank	2020-04-04	0	0	1	1
1657	0	Center_07	611	1	2020-03-21	0	2	1	2020-03-21	F	0	82	14	14	14	0	0	1	0	0	Geen IC	2.Moderate	2	0	0	0	blank	blank	0															blank	2020-03-23	0	0	0	0
1658	0	Center_07	611	0	2020-03-21	2	2	1	2020-03-21	F	0	82	16	16	16	0	0	1	0	0	Geen IC	2.Moderate	2	0	0	0	blank	blank	0															blank	2020-03-23	0	0	0	0
1659	0	Center_07	612	1	2020-03-19	0	4	1	2029-03-15	F	0	64	9	9	10	0	0	1	0	0	Geen IC	2.Moderate	2	0	0	0	blank	blank	0															blank	2020-03-23	0	0	0	0
1660	0	Center_07	612	0	2020-03-19	2	4	1	2029-03-15	F	0	64	11	11	12	0	0	1	0	0	Geen IC	2.Moderate	2	0	0	0	blank	blank	0															blank	2020-03-23	0	0	0	0
1661	0	Center_07	612	0	2020-03-19	4	4	1	2029-03-15	F	0	64	13	13	14	0	0	1	0	0	Geen IC	2.Moderate	2	0	0	0	blank	blank	0															blank	2020-03-23	0	0	0	0
1662	0	Center_07	613	1	2020-03-21	0	Still	1	2020-03-21	M	1	69	14	14	14	0	0	0	1	1	Wel IC	4.Critical/Fatal	4	1	1	1	blank	blank	0															blank		0	0	1	1
1663	0	Center_07	613	0	2020-03-21	1	Still	1	2020-03-21	M	1	69	15	16	16	0	0	0	1	1	Wel IC	4.Critical/Fatal	4	1	1	1	blank	blank	0															blank	not yet	0	0	1	1
1664	0	Center_07	613	0	2020-03-21	6	Still	1	2020-03-21	M	1	69	20	20	20	0	0	0	1	1	Wel IC	4.Critical/Fatal	4	1	1	1	blank	blank	0															blank	not yet	0	0	1	1
1665	0	Center_07	613	0	2020-03-21	9	Still	0	2020-03-21	M	1	69	23	24	24	0	0	0	1	1	Wel IC	4.Critical/Fatal	4	1	1	1	blank	blank	0															blank	not yet	0	0	1	1
1666	0	Center_07	614	1	2020-03-12	0	27	1	2020-03-20	F	0	62	5	5	6	1	0	1	0	0	Geen IC	3.Severe	3	0	0	1	blank	blank	0															blank	2020-04-08	0	0	0	0
1667	0	Center_07	614	0	2020-03-12	8	27	0	2020-03-20	F	0	62	13	13	14	0	0	1	0	0	Geen IC	3.Severe	3	0	0	1	blank	blank	0															blank	2020-04-08	0	0	0	0
1668	0	Center_07	614	0	2020-03-12	10	27	0	2020-03-20	F	0	62	15	16	16	0	0	1	0	0	Geen IC	3.Severe	3	0	0	1	blank	blank	0															blank	2020-04-08	0	0	0	0
1669	0	Center_07	614	0	2020-03-12	12	27	0	2020-03-20	F	0	62	17	18	18	0	0	1	0	0	Geen IC	3.Severe	3	0	0	1	blank	blank	0															blank	2020-04-08	0	0	0	0
1670	0	Center_07	614	0	2020-03-12	14	27	0	2020-03-20	F	0	62	19	20	20	0	0	1	0	0	Geen IC	3.Severe	3	0	0	1	blank	blank	0															blank	2020-04-08	0	0	0	0
1671	0	Center_07	614	0	2020-03-12	16	27	0	2020-03-20	F	0	62	21	22	22	0	0	1	0	0	Geen IC	3.Severe	3	0	0	1	blank	blank	0															blank	2020-04-08	0	0	0	0
1672	0	Center_07	614	0	2020-03-12	18	27	0	2020-03-20	F	0	62	23	24	24	0	0	1	0	0	Geen IC	3.Severe	3	0	0	1	blank	blank	0															blank	2020-04-08	0	0	0	0
1673	0	Center_07	615	1	2020-03-20	1	4	1	00/01/1900	M	1	52	7	7	8	1	0	1	0	0	Geen IC	2.Moderate	2	0	0	0	blank	blank	0															blank	2020-03-24	0	0	0	0
1674	0	Center_07	615	0	2020-03-20	2	4	1	00/01/1900	M	1	52	8	8	8	0	0	1	0	0	Geen IC	2.Moderate	2	0	0	0	blank	blank	0															blank	2020-03-24	0	0	0	0
1675	0	Center_07	615	0	2020-03-20	4	4	1	00/01/1900	M	1	52	10	10	10	0	0	1	0	0	Geen IC	2.Moderate	2	0	0	0	blank	blank	0															blank	2020-03-24	0	0	0	0
1676	0	Center_07	616	1	2020-03-20	1	10	1	2020-03-20	F	0	81	6	6	6	1	0	1	0	0	Geen IC	4.Critical/Fatal	5	1	1	1	blank	blank	0															blank		2020-03-30	1	1	1
1677	0	Center_07	616	0	2020-03-20	3	10	1	2020-03-20	F	0	81	8	8	8	0	0	1	0	0	Geen IC	4.Critical/Fatal	5	1	1	1	blank	blank	0															blank		2020-03-30	1	1	1
1678	0	Center_07	616	0	2020-03-20	4	10	1	2020-03-20	F	0	81	9	9	10	0	0	1	0	0	Geen IC	4.Critical/Fatal	5	1	1	1	blank	blank	0															blank		2020-03-30	1	1	1
1679	0	Center_07	616	0	2020-03-20	6	10	1	2020-03-20	F	0	81	11	11	12	0	0	1	0	0	Geen IC	4.Critical/Fatal	5	1	1	1	blank	blank	0															blank		2020-03-30	1	1	1
1680	0	Center_07	617	1	2020-03-19	0	5	1	2020-03-19	F	0	83	1	1	2	1	0	1	0	0	Geen IC	4.Critical/Fatal	5	1	1	1	blank	blank	0															blank		2020-03-24	1	1	1
1681	0	Center_07	617	0	2020-03-19	1	5	1	2020-03-19	F	0	83	2	1	2	1	0	1	0	0	Geen IC	4.Critical/Fatal	5	1	1	1	blank	blank	0															blank		2020-03-24	1	1	1
1682	0	Center_07	617	0	2020-03-19	3	5	1	2020-03-19	F	0	83	4	4	4	1	0	1	0	0	Geen IC	4.Critical/Fatal	5	1	1	1	blank	blank	0															blank		2020-03-24	1	1	1
1683	0	Center_07	617	0	2020-03-19	5	5	1	2020-03-19	F	0	83	6	6	6	1	0	1	0	0	Geen IC	4.Critical/Fatal	5	1	1	1	blank	blank	0															blank		2020-03-24	1	1	1
1684	0	Center_07	618	1	2020-03-18	2	8	1	00/01/1900	F	0	76	9	9	10	0	0	1	0	0	Geen IC	3.Severe	3	0	0	1	blank	blank	0															blank	2020-03-26	0	0	0	0
1685	0	Center_07	618	0	2020-03-18	4	8	1	00/01/1900	F	0	76	11	11	12	0	0	1	0	0	Geen IC	3.Severe	3	0	0	1	blank	blank	0															blank	2020-03-26	0	0	0	0
1686	0	Center_07	618	0	2020-03-18	6	8	1	00/01/1900	F	0	76	13	13	14	0	0	1	0	0	Geen IC	3.Severe	3	0	0	1	blank	blank	0															blank	2020-03-26	0	0	0	0
1687	0	Center_07	618	0	2020-03-18	8	8	0	00/01/1900	F	0	76	15	16	16	0	0	1	0	0	Geen IC	3.Severe	3	0	0	1	blank	blank	0															blank	2020-03-26	0	0	0	0
1688	0	Center_07	619	1	2020-03-19	2	4	1	2020-03-19	M	1	54	10	10	10	0	0	1	0	0	Geen IC	2.Moderate	2	0	0	0	blank	blank	0															blank	2020-03-23	0	0	0	0
1689	0	Center_07	619	0	2020-03-19	4	4	1	2020-03-19	M	1	54	12	12	12	0	0	1	0	0	Geen IC	2.Moderate	2	0	0	0	blank	blank	0															blank	2020-03-23	0	0	0	0
1690	0	Center_07	620	1	2020-03-22	3	12	1	2020-03-22	M	1	60	12	12	12	0	0	0	1	1	Wel IC	4.Critical/Fatal	4	1	1	1	blank	blank	0															blank	2020-04-03	0	0	1	1
1691	0	Center_07	620	0	2020-03-22	3	12	1	2020-03-22	M	1	60	12	12	12	0	0	0	1	1	Wel IC	4.Critical/Fatal	4	1	1	1	blank	blank	0															blank	2020-04-03	0	0	1	1
1692	0	Center_07	620	0	2020-03-22	5	12	1	2020-03-22	M	1	60	14	14	14	0	0	0	1	1	Wel IC	4.Critical/Fatal	4	1	1	1	blank	blank	0															blank	2020-04-03	0	0	1	1
1693	0	Center_07	620	0	2020-03-22	8	12	0	2020-03-22	M	1	60	17	18	18	0	0	0	1	1	Wel IC	4.Critical/Fatal	4	1	1	1	blank	blank	0															blank	2020-04-03	0	0	1	1
1694	0	Center_07	621	1	2020-03-19	2	2	1	2020-03-19	M	1	78	23	24	24	0	0	1	0	0	Geen IC	4.Critical/Fatal	5	1	1	1	blank	blank	0															blank		2020-03-21	1	1	1
1695	0	Center_07	622	1	2020-03-19	0	5	1	2020-03-19	M	1	54	7	7	8	1	0	1	0	0	Wel IC	2.Moderate	2	0	0	0	blank	blank	0															blank	2020-03-24	0	0	0	0
1696	0	Center_07	622	0	2020-03-19	5	5	1	2020-03-19	M	1	54	12	12	12	0	0	1	0	0	Wel IC	2.Moderate	2	0	0	0	blank	blank	0															blank	2020-03-24	0	0	0	0
1697	0	Center_07	623	1	2020-03-20	0	6	1	2020-03-20	F	0	65	2	2	2	1	0	1	0	0	Geen IC	3.Severe	3	0	0	1	blank	blank	0															blank	2020-03-26	0	0	0	0
1698	0	Center_07	623	0	2020-03-20	2	6	1	2020-03-20	F	0	65	4	4	4	1	0	1	0	0	Geen IC	3.Severe	3	0	0	1	blank	blank	0															blank	2020-03-26	0	0	0	0
1699	0	Center_07	623	0	2020-03-20	4	6	1	2020-03-20	F	0	65	6	6	6	1	0	1	0	0	Geen IC	3.Severe	3	0	0	1	blank	blank	0															blank	2020-03-26	0	0	0	0
1700	0	Center_07	623	0	2020-03-20	6	6	1	2020-03-20	F	0	65	8	8	8	0	0	1	0	0	Geen IC	3.Severe	3	0	0	1	blank	blank	0															blank	2020-03-26	0	0	0	0
1701	0	Center_07	624	1	2020-03-21	0	3	1	2020-03-21	M	1	80	1	1	2	1	0	1	0	0	Geen IC	4.Critical/Fatal	5	1	1	1	blank	blank	0															blank		2020-03-24	1	1	1
1702	0	Center_07	624	0	2020-03-21	1	3	1	2020-03-21	M	1	80	2	2	2	1	0	1	0	0	Geen IC	4.Critical/Fatal	5	1	1	1	blank	blank	0															blank		2020-03-24	1	1	1
1703	0	Center_07	624	0	2020-03-21	3	3	1	2020-03-21	M	1	80	4	4	4	1	0	1	0	0	Geen IC	4.Critical/Fatal	5	1	1	1	blank	blank	0															blank		2020-03-24	1	1	1
1704	0	Center_07	625	1	2020-03-23	0	30	1	2020-03-23	M	1	74	7	7	8	1	0	0	1	1	Wel IC	4.Critical/Fatal	4	1	1	1	blank	blank	0															blank	2020-05-01	0	0	1	1
1705	0	Center_07	625	0	2020-03-23	2	30	1	2020-03-23	M	1	74	9	9	10	0	0	0	1	1	Wel IC	4.Critical/Fatal	4	1	1	1	blank	blank	0															blank	2020-05-01	0	0	1	1
1706	0	Center_07	625	0	2020-03-23	3	30	1	2020-03-23	M	1	74	10	10	10	0	0	0	1	1	Wel IC	4.Critical/Fatal	4	1	1	1	blank	blank	0															blank	2020-05-01	0	0	1	1
1707	0	Center_07	625	0	2020-03-23	4	30	1	2020-03-23	M	1	74	11	11	12	0	0	0	1	1	Wel IC	4.Critical/Fatal	4	1	1	1	blank	blank	0															blank	2020-05-01	0	0	1	1
1708	0	Center_07	625	0	2020-03-23	7	30	1	2020-03-23	M	1	74	14	14	14	0	0	0	1	1	Wel IC	4.Critical/Fatal	4	1	1	1	blank	blank	0															blank	2020-05-01	0	0	1	1
1709	Geen corona	Center_07	626	1	2020-03-14	9	9	0	00/01/1900	F	0	67	38	29-46	29-46		0	1	0	0	Geen IC	3.Severe	3	0	0	1	blank	blank	0															blank	2020-03-23	0	0	0	0
1710	0	Center_07	627	1	2020-03-22	0	5	1	2020-03-22	F	0	63	8	8	8	0	0	1	0	0	Geen IC	2.Moderate	2	0	0	0	blank	blank	0															blank	2020-03-27	0	0	0	0
1711	0	Center_07	627	0	2020-03-22	1	5	1	2020-03-22	F	0	63	9	9	10	0	0	1	0	0	Geen IC	2.Moderate	2	0	0	0	blank	blank	0															blank	2020-03-27	0	0	0	0
1712	0	Center_07	627	0	2020-03-22	3	5	1	2020-03-22	F	0	63	11	11	12	0	0	1	0	0	Geen IC	2.Moderate	2	0	0	0	blank	blank	0															blank	2020-03-27	0	0	0	0
1713	0	Center_07	627	0	2020-03-22	5	5	1	2020-03-22	F	0	63	13	13	14	0	0	1	0	0	Geen IC	2.Moderate	2	0	0	0	blank	blank	0															blank	2020-03-27	0	0	0	0
1714	0	Center_07	628	1	2020-03-23	0	3	1	00/01/1900	M	1	71	7	7	8	1	0	1	0	0	Geen IC	2.Moderate	2	0	0	0	blank	blank	0															blank	2020-03-26	0	0	0	0
1715	0	Center_07	628	0	2020-03-23	1	3	1	00/01/1900	M	1	71	8	8	8	0	0	1	0	0	Geen IC	2.Moderate	2	0	0	0	blank	blank	0															blank	2020-03-26	0	0	0	0
1716	0	Center_07	628	0	2020-03-23	3	3	1	00/01/1900	M	1	71	10	10	10	0	0	1	0	0	Geen IC	2.Moderate	2	0	0	0	blank	blank	0															blank	2020-03-26	0	0	0	0
1717	0	Center_07	629	1	2020-03-23	0	5	1	2020-03-23	M	1	68	10	10	10	0	0	1	0	0	Geen IC	2.Moderate	2	0	0	0	blank	blank	0															blank	2020-03-28	0	0	0	0
1718	0	Center_07	629	0	2020-03-23	1	5	1	2020-03-23	M	1	68	11	11	12	0	0	1	0	0	Geen IC	2.Moderate	2	0	0	0	blank	blank	0															blank	2020-03-28	0	0	0	0
1719	0	Center_07	629	0	2020-03-23	5	5	1	2020-03-23	M	1	68	15	16	16	0	0	1	0	0	Geen IC	2.Moderate	2	0	0	0	blank	blank	0															blank	2020-03-28	0	0	0	0
1720	0	Center_07	630	1	2020-03-23	0	3	1	2020-03-23	M	1	65	14	14	14	0	0	1	0	0	Geen IC	2.Moderate	2	0	0	0	blank	blank	0															blank	2020-03-26	0	0	0	0
1721	0	Center_07	630	0	2020-03-23	1	3	1	2020-03-23	M	1	65	15	16	16	0	0	1	0	0	Geen IC	2.Moderate	2	0	0	0	blank	blank	0															blank	2020-03-26	0	0	0	0
1722	0	Center_07	630	0	2020-03-23	3	3	1	2020-03-23	M	1	65	17	18	18	0	0	1	0	0	Geen IC	2.Moderate	2	0	0	0	blank	blank	0															blank	2020-03-26	0	0	0	0
1723	0	Center_07	631	1	2020-03-23	0	6	1	2020-03-23	M	1	31	8	8	8	0	0	1	0	0	Geen IC	3.Severe	3	0	0	1	blank	blank	0															blank	2020-03-29	0	0	0	0
1724	0	Center_07	631	0	2020-03-23	2	6	1	2020-03-23	M	1	31	10	10	10	0	0	1	0	0	Geen IC	3.Severe	3	0	0	1	blank	blank	0															blank	2020-03-29	0	0	0	0
1725	0	Center_07	631	0	2020-03-23	4	6	1	2020-03-23	M	1	31	12	12	12	0	0	1	0	0	Geen IC	3.Severe	3	0	0	1	blank	blank	0															blank	2020-03-29	0	0	0	0
1726	0	Center_07	631	0	2020-03-23	6	6	1	2020-03-23	M	1	31	14	14	14	0	0	1	0	0	Geen IC	3.Severe	3	0	0	1	blank	blank	0															blank	2020-03-29	0	0	0	0
1727	0	Center_07	632	1	2020-03-22	0	6	1	2020-03-22	M	1	57	7	7	8	1	0	1	0	0	Geen IC	3.Severe	3	0	0	1	blank	blank	0															blank	2020-03-28	0	0	0	0
1728	0	Center_07	632	0	2020-03-22	2	6	1	2020-03-22	M	1	57	9	9	10	0	0	1	0	0	Geen IC	3.Severe	3	0	0	1	blank	blank	0															blank	2020-03-28	0	0	0	0
1729	0	Center_07	632	0	2020-03-22	4	6	1	2020-03-22	M	1	57	11	11	12	0	0	1	0	0	Geen IC	3.Severe	3	0	0	1	blank	blank	0															blank	2020-03-28	0	0	0	0
1730	0	Center_07	632	0	2020-03-22	6	6	1	2020-03-22	M	1	57	13	13	14	0	0	1	0	0	Geen IC	3.Severe	3	0	0	1	blank	blank	0															blank	2020-03-28	0	0	0	0
1731	0	Center_07	633	1	2020-03-19	0	7	1	00/01/1900	M	1	61	7	7	8	1	0	1	0	0	Geen IC	3.Severe	3	0	0	1	blank	blank	0															blank	2020-03-26	0	0	0	0
1732	0	Center_07	633	0	2020-03-19	3	7	1	00/01/1900	M	1	61	10	10	10	0	0	1	0	0	Geen IC	3.Severe	3	0	0	1	blank	blank	0															blank	2020-03-26	0	0	0	0
1733	0	Center_07	633	0	2020-03-19	5	7	1	00/01/1900	M	1	61	12	12	12	0	0	1	0	0	Geen IC	3.Severe	3	0	0	1	blank	blank	0															blank	2020-03-26	0	0	0	0
1734	0	Center_07	633	0	2020-03-19	7	7	1	00/01/1900	M	1	61	14	14	14	0	0	1	0	0	Geen IC	3.Severe	3	0	0	1	blank	blank	0															blank	2020-03-26	0	0	0	0
1735	0	Center_07	634	1	2020-03-22	0	12	1	2020-03-26	M	1	70	6	6	6	1	0	0	1	1	Wel IC	4.Critical/Fatal	4	1	1	1	blank	blank	0															blank	2020-04-03	0	0	1	1
1736	0	Center_07	634	0	2020-03-22	2	12	1	2020-03-26	M	1	70	8	8	8	0	0	0	1	1	Wel IC	4.Critical/Fatal	4	1	1	1	blank	blank	0															blank	2020-04-03	0	0	1	1
1737	0	Center_07	634	0	2020-03-22	5	12	1	2020-03-26	M	1	70	11	11	12	0	0	0	1	1	Wel IC	4.Critical/Fatal	4	1	1	1	blank	blank	0															blank	2020-04-03	0	0	1	1
1738	0	Center_07	634	0	2020-03-22	8	12	0	2020-03-26	M	1	70	14	14	14	0	0	0	1	1	Wel IC	4.Critical/Fatal	4	1	1	1	blank	blank	0															blank	2020-04-03	0	0	1	1
1739	0	Center_07	635	1	2020-03-19	0	6	1	2020-03-19	M	1	49	8	8	8	0	0	1	0	0	Geen IC	3.Severe	3	0	0	1	blank	blank	0															blank	2020-03-25	0	0	0	0
1740	0	Center_07	635	0	2020-03-19	5	6	1	2020-03-19	M	1	49	13	13	14	0	0	1	0	0	Geen IC	3.Severe	3	0	0	1	blank	blank	0															blank	2020-03-25	0	0	0	0
1741	0	Center_07	635	0	2020-03-19	6	6	1	2020-03-19	M	1	49	14	14	14	0	0	1	0	0	Geen IC	3.Severe	3	0	0	1	blank	blank	0															blank	2020-03-25	0	0	0	0
1742	0	Center_07	636	1	2020-03-24	0	5	1	2020-03-24	M	1	73	5	5	6	1	0	1	0	0	Geen IC	2.Moderate	2	0	0	0	blank	blank	0															blank	2020-03-29	0	0	0	0
1743	0	Center_07	636	0	2020-03-24	1	5	1	2020-03-24	M	1	73	6	6	6	1	0	1	0	0	Geen IC	2.Moderate	2	0	0	0	blank	blank	0															blank	2020-03-29	0	0	0	0
1744	0	Center_07	636	0	2020-03-24	3	5	1	2020-03-24	M	1	73	8	8	8	0	0	1	0	0	Geen IC	2.Moderate	2	0	0	0	blank	blank	0															blank	2020-03-29	0	0	0	0
1745	0	Center_07	636	0	2020-03-24	5	5	1	2020-03-24	M	1	73	10	10	10	0	0	1	0	0	Geen IC	2.Moderate	2	0	0	0	blank	blank	0															blank	2020-03-29	0	0	0	0
1746	0	Center_07	637	1	2020-03-24	0	4	1	2020-03-24	M	1	49	10	10	10	0	0	1	0	0	Geen IC	2.Moderate	2	0	0	0	blank	blank	0															blank	2020-03-28	0	0	0	0
1747	0	Center_07	637	0	2020-03-24	2	4	1	2020-03-24	M	1	49	12	12	12	0	0	1	0	0	Geen IC	2.Moderate	2	0	0	0	blank	blank	0															blank	2020-03-28	0	0	0	0
1748	0	Center_07	637	0	2020-03-24	4	4	1	2020-03-24	M	1	49	14	14	14	0	0	1	0	0	Geen IC	2.Moderate	2	0	0	0	blank	blank	0															blank	2020-03-28	0	0	0	0
1749	0	Center_07	638	1	2020-03-23	0	2	1	2020-03-23	M	1	74	10	10	10	0	0	1	0	0	Geen IC	2.Moderate	2	0	0	0	blank	blank	0															blank	2020-03-25	0	0	0	0
1750	0	Center_07	638	0	2020-03-23	2	2	1	2020-03-23	M	1	74	12	12	12	0	0	1	0	0	Geen IC	2.Moderate	2	0	0	0	blank	blank	0															blank	2020-03-25	0	0	0	0
1751	0	Center_07	639	1	2020-03-23	0	3	1	2020-03-23	M	1	75	7	7	8	1	0	1	0	0	Geen IC	2.Moderate	2	0	0	0	blank	blank	0															blank	2020-03-26	0	0	0	0
1752	0	Center_07	639	0	2020-03-23	1	3	1	2020-03-23	M	1	75	8	8	8	0	0	1	0	0	Geen IC	2.Moderate	2	0	0	0	blank	blank	0															blank	2020-03-26	0	0	0	0
1753	0	Center_07	639	0	2020-03-23	3	3	1	2020-03-23	M	1	75	10	10	10	0	0	1	0	0	Geen IC	2.Moderate	2	0	0	0	blank	blank	0															blank	2020-03-26	0	0	0	0
1754	0	Center_07	640	1	2020-03-22	0	24	1	2020-03-22	M	1	72	7	7	8	1	0	0	1	1	Wel IC	4.Critical/Fatal	4	1	1	1	blank	blank	0															blank	2020-04-15	0	0	1	1
1755	0	Center_07	640	0	2020-03-22	2	24	1	2020-03-22	M	1	72	9	9	10	0	0	0	1	1	Wel IC	4.Critical/Fatal	4	1	1	1	blank	blank	0															blank	2020-04-15	0	0	1	1
1756	0	Center_07	640	0	2020-03-22	6	24	1	2020-03-22	M	1	72	13	13	14	0	0	0	1	1	Wel IC	4.Critical/Fatal	4	1	1	1	blank	blank	0															blank	2020-04-15	0	0	1	1
1757	0	Center_07	640	0	2020-03-22	8	24	0	2020-03-22	M	1	72	15	16	16	0	0	0	1	1	Wel IC	4.Critical/Fatal	4	1	1	1	blank	blank	0															blank	2020-04-15	0	0	1	1
1758	0	Center_07	641	1	2020-03-24	0	1	1	2020-03-24	M	1	84	4	4	4	1	0	1	0	0	Geen IC	4.Critical/Fatal	5	1	1	1	blank	blank	0															blank		2020-03-25	1	1	1
1759	0	Center_07	641	0	2020-03-24	1	1	1	2020-03-24	M	1	84	5	5	6	1	0	1	0	0	Geen IC	4.Critical/Fatal	5	1	1	1	blank	blank	0															blank		2020-03-25	1	1	1
1760	0	Center_07	642	1	2020-03-20	0	7	1	2020-03-20	F	0	47	5	5	6	1	0	1	0	0	Geen IC	3.Severe	3	0	0	1	blank	blank	0															blank	2020-03-27	0	0	0	0
1761	0	Center_07	642	0	2020-03-20	5	7	1	2020-03-20	F	0	47	10	10	10	0	0	1	0	0	Geen IC	3.Severe	3	0	0	1	blank	blank	0															blank	2020-03-27	0	0	0	0
1762	0	Center_07	642	0	2020-03-20	7	7	1	2020-03-20	F	0	47	12	12	12	0	0	1	0	0	Geen IC	3.Severe	3	0	0	1	blank	blank	0															blank	2020-03-27	0	0	0	0
1763	0	Center_07	643	1	2020-03-22	0	19	1	2020-03-22	F	0	75	6	6	6	1	0	1	0	0	Geen IC	3.Severe	3	0	0	1	blank	blank	0															blank	2020-04-10	0	0	0	0
1764	0	Center_07	643	0	2020-03-22	1	19	1	2020-03-22	F	0	75	7	7	8	1	0	1	0	0	Geen IC	3.Severe	3	0	0	1	blank	blank	0															blank	2020-04-10	0	0	0	0
1765	0	Center_07	643	0	2020-03-22	3	19	1	2020-03-22	F	0	75	8	8	8	0	0	1	0	0	Geen IC	3.Severe	3	0	0	1	blank	blank	0															blank	2020-04-10	0	0	0	0
1766	0	Center_07	643	0	2020-03-22	5	19	1	2020-03-22	F	0	75	10	10	10	0	0	1	0	0	Geen IC	3.Severe	3	0	0	1	blank	blank	0															blank	2020-04-10	0	0	0	0
1767	0	Center_07	643	0	2020-03-22	7	19	1	2020-03-22	F	0	75	12	12	12	0	0	1	0	0	Geen IC	3.Severe	3	0	0	1	blank	blank	0															blank	2020-04-10	0	0	0	0
1768	0	Center_07	644	1	2020-03-22	0	1	1	00/01/1900	F	0	61	4	4	4	1	0	1	0	0	Geen IC	2.Moderate	2	0	0	0	blank	blank	0															blank	2020-03-23	0	0	0	0
1769	0	Center_07	644	0	2020-03-22	1	1	1	00/01/1900	F	0	61	5	5	6	1	0	1	0	0	Geen IC	2.Moderate	2	0	0	0	blank	blank	0															blank	2020-03-23	0	0	0	0
1770	0	Center_07	645	1	2020-03-16	0	13	1	2020-03-16	F	0	64	4	4	4	1	0	1	0	0	0	3.Severe	3	0	0	1	blank	blank	0															blank	2020-03-29	0	0	0	0
1771	0	Center_07	645	0	2020-03-16	9	13	0	2020-03-16	F	0	64	13	13	14	0	0	1	0	0	0	3.Severe	3	0	0	1	blank	blank	0															blank	2020-03-29	0	0	0	0
1772	0	Center_07	645	0	2020-03-16	13	13	0	2020-03-16	F	0	64	17	18	18	0	0	1	0	0	0	3.Severe	3	0	0	1	blank	blank	0															blank	2020-03-29	0	0	0	0
1773	0	Center_07	646	1	2020-03-23	0	6	1	2020-03-23	M	1	84	4	4	4	1	0	1	0	0	Geen IC	4.Critical/Fatal	5	1	1	1	blank	blank	0															blank		2020-03-29	1	1	1
1774	0	Center_07	646	0	2020-03-23	2	6	1	2020-03-23	M	1	84	6	6	6	1	0	1	0	0	Geen IC	4.Critical/Fatal	5	1	1	1	blank	blank	0															blank		2020-03-29	1	1	1
1775	0	Center_07	646	0	2020-03-23	6	6	1	2020-03-23	M	1	84	10	10	10	0	0	1	0	0	Geen IC	4.Critical/Fatal	5	1	1	1	blank	blank	0															blank		2020-03-29	1	1	1
1776	0	Center_07	647	1	2020-03-23	0	2	1	2020-03-23	M	1	82	14	14	14	0	0	1	0	0	Geen IC	4.Critical/Fatal	5	1	1	1	blank	blank	0															blank		2020-03-25	1	1	1
1777	0	Center_07	647	0	2020-03-23	2	2	1	2020-03-23	M	1	82	16	16	16	0	0	1	0	0	Geen IC	4.Critical/Fatal	5	1	1	1	blank	blank	0															blank		2020-03-25	1	1	1
1778	0	Center_07	648	1	2020-03-23	0	shift	1	2020-03-23	M	1	75	5	5	6	1	0	1	0	0	Geen IC	3.Severe	3	0	0	1	blank	blank	0															blank	2020-03-23	0	0	0	0
1779	0	Center_07	649	1	2020-03-23	0	6	1	2020-03-23	M	1	57	7	7	8	1	0	1	0	0	Geen IC	3.Severe	3	0	0	1	blank	blank	0															blank	2020-03-29	0	0	0	0
1780	0	Center_07	649	0	2020-03-23	1	6	1	2020-03-23	M	1	57	8	8	8	0	0	1	0	0	Geen IC	3.Severe	3	0	0	1	blank	blank	0															blank	2020-03-29	0	0	0	0
1781	0	Center_07	649	0	2020-03-23	3	6	1	2020-03-23	M	1	57	10	10	10	0	0	1	0	0	Geen IC	3.Severe	3	0	0	1	blank	blank	0															blank	2020-03-29	0	0	0	0
1782	0	Center_07	649	0	2020-03-23	6	6	1	2020-03-23	M	1	57	13	13	14	0	0	1	0	0	Geen IC	3.Severe	3	0	0	1	blank	blank	0															blank	2020-03-29	0	0	0	0
1783	0	Center_07	650	1	2020-03-23	2	2	1	2020-03-23	M	1	73	5	5	6	1	0	1	0	0	Geen IC	4.Critical/Fatal	5	1	1	1	blank	blank	0															blank		2020-03-25	1	1	1
1784	0	Center_07	651	1	2020-03-14	10	16	0	2020-03-22	F	0	40	1	1	2	1	0	1	0	0	Geen IC	3.Severe	3	0	0	1	blank	blank	0															blank	2020-03-30	0	0	0	0
1785	0	Center_07	651	0	2020-03-14	13	16	0	2020-03-22	F	0	40	4	4	4	1	0	1	0	0	Geen IC	3.Severe	3	0	0	1	blank	blank	0															blank	2020-03-30	0	0	0	0
1786	0	Center_07	651	0	2020-03-14	16	16	0	2020-03-22	F	0	40	7	7	8	1	0	1	0	0	Geen IC	3.Severe	3	0	0	1	blank	blank	0															blank	2020-03-30	0	0	0	0
1787	0	Center_07	652	1	2020-03-24	0	14	1	2020-03-19	F	0	57	7	7	8	1	0	1	0	0	Geen IC	3.Severe	3	0	0	1	blank	blank	0															blank	2020-04-07	0	0	0	0
1788	0	Center_07	652	0	2020-03-24	2	14	1	2020-03-19	F	0	57	9	9	10	0	0	1	0	0	Geen IC	3.Severe	3	0	0	1	blank	blank	0															blank	2020-04-07	0	0	0	0
1789	0	Center_07	652	0	2020-03-24	3	14	1	2020-03-19	F	0	57	10	10	10	0	0	1	0	0	Geen IC	3.Severe	3	0	0	1	blank	blank	0															blank	2020-04-07	0	0	0	0
1790	0	Center_07	652	0	2020-03-24	5	14	1	2020-03-19	F	0	57	12	12	12	0	0	1	0	0	Geen IC	3.Severe	3	0	0	1	blank	blank	0															blank	2020-04-07	0	0	0	0
1791	0	Center_07	653	1	2020-03-25	0	5	1	2020-03-25	M	1	77	7	7	8	1	0	1	0	0	Geen IC	4.Critical/Fatal	5	1	1	1	blank	blank	0															blank		2020-03-30	1	1	1
1792	0	Center_07	653	0	2020-03-25	2	5	1	2020-03-25	M	1	77	9	9	10	0	0	1	0	0	Geen IC	4.Critical/Fatal	5	1	1	1	blank	blank	0															blank		2020-03-30	1	1	1
1793	0	Center_07	653	0	2020-03-25	5	5	1	2020-03-25	M	1	77	12	12	12	0	0	1	0	0	Geen IC	4.Critical/Fatal	5	1	1	1	blank	blank	0															blank		2020-03-30	1	1	1
1794	0	Center_07	654	1	2020-03-25	0	2	1	00/01/1900	F	0	62	11	11	12	0	0	1	0	0	Geen IC	2.Moderate	2	0	0	0	blank	blank	0															blank	2020-03-27	0	0	0	0
1795	0	Center_07	654	0	2020-03-25	2	2	1	00/01/1900	F	0	62	13	13	14	0	0	1	0	0	Geen IC	2.Moderate	2	0	0	0	blank	blank	0															blank	2020-03-27	0	0	0	0
1796	0	Center_07	655	1	2020-03-25	0	2	1	2020-03-25	M	1	74	35	29-46	29-46		0	1	0	0	Geen IC	2.Moderate	2	0	0	0	blank	blank	0															blank	2020-03-27	0	0	0	0
1797	0	Center_07	655	0	2020-03-25	2	2	1	2020-03-25	M	1	74	37	29-46	29-46		0	1	0	0	Geen IC	2.Moderate	2	0	0	0	blank	blank	0															blank	2020-03-27	0	0	0	0
1798	0	Center_07	656	1	2020-03-24	0	3	1	2020-03-25	F	0	75	1	1	2	1	0	1	0	0	Geen IC	2.Moderate	2	0	0	0	blank	blank	0															blank	2020-03-27	0	0	0	0
1799	0	Center_07	656	0	2020-03-24	2	3	1	2020-03-25	F	0	75	3	3	4	1	0	1	0	0	Geen IC	2.Moderate	2	0	0	0	blank	blank	0															blank	2020-03-27	0	0	0	0
1800	0	Center_07	656	0	2020-03-24	3	3	1	2020-03-25	F	0	75	4	4	4	1	0	1	0	0	Geen IC	2.Moderate	2	0	0	0	blank	blank	0															blank	2020-03-27	0	0	0	0
1801	0	Center_07	657	1	2020-03-25	0	2	1	2020-03-25	F	0	73	7	7	8	1	0	1	0	0	Geen IC	2.Moderate	2	0	0	0	blank	blank	0															blank	2020-03-27	0	0	0	0
1802	0	Center_07	657	0	2020-03-25	2	2	1	2020-03-25	F	0	73	9	9	10	0	0	1	0	0	Geen IC	2.Moderate	2	0	0	0	blank	blank	0															blank	2020-03-27	0	0	0	0
1803	0	Center_07	658	1	2020-03-24	0	20	1	2020-03-24	M	1	63	7	7	8	1	0	1	0	0	Geen IC	3.Severe	3	0	0	1	blank	blank	0															blank		0	0	0	0
1804	0	Center_07	658	0	2020-03-24	1	20	1	2020-03-24	M	1	63	8	8	8	0	0	1	0	0	Geen IC	3.Severe	3	0	0	1	blank	blank	0															blank		0	0	0	0
1805	0	Center_07	658	0	2020-03-24	3	20	1	2020-03-24	M	1	63	10	10	10	0	0	1	0	0	Geen IC	3.Severe	3	0	0	1	blank	blank	0															blank		0	0	0	0
1806	0	Center_07	658	0	2020-03-24	5	20	1	2020-03-24	M	1	63	12	12	12	0	0	1	0	0	Geen IC	3.Severe	3	0	0	1	blank	blank	0															blank		0	0	0	0
1807	0	Center_07	659	1	2020-03-26	0	6	1	00/01/1900	F	0	90	7	7	8	1	0	1	0	0	Geen IC	4.Critical/Fatal	5	1	1	1	blank	blank	0															blank		2020-04-01	1	1	1
1808	0	Center_07	659	0	2020-03-26	4	6	1	00/01/1900	F	0	90	11	11	12	0	0	1	0	0	Geen IC	4.Critical/Fatal	5	1	1	1	blank	blank	0															blank		2020-04-01	1	1	1
1809	0	Center_07	660	1	2020-03-25	0	2	1	2020-03-25	M	1	57	7	7	8	1	0	1	0	0	Geen IC	2.Moderate	2	0	0	0	blank	blank	0															blank	2020-03-27	0	0	0	0
1810	0	Center_07	660	0	2020-03-25	2	2	1	2020-03-25	M	1	57	9	9	10	0	0	1	0	0	Geen IC	2.Moderate	2	0	0	0	blank	blank	0															blank	2020-03-27	0	0	0	0
1811	0	Center_07	661	1	2020-03-25	0	2	1	2020-03-25	M	1	58	8	8	8	0	0	1	0	0	Geen IC	2.Moderate	2	0	0	0	blank	blank	0															blank	2020-03-27	0	0	0	0
1812	0	Center_07	661	0	2020-03-25	2	2	1	2020-03-25	M	1	58	10	10	10	0	0	1	0	0	Geen IC	2.Moderate	2	0	0	0	blank	blank	0															blank	2020-03-27	0	0	0	0
1813	0	Center_07	662	1	2020-03-24	0	3	1	2020-03-25	F	0	63	10	10	10	0	0	1	0	0	Geen IC	2.Moderate	2	0	0	0	blank	blank	0															blank	2020-03-27	0	0	0	0
1814	0	Center_07	662	0	2020-03-24	1	3	1	2020-03-25	F	0	63	11	11	12	0	0	1	0	0	Geen IC	2.Moderate	2	0	0	0	blank	blank	0															blank	2020-03-27	0	0	0	0
1815	0	Center_07	662	0	2020-03-24	3	3	1	2020-03-25	F	0	63	13	13	14	0	0	1	0	0	Geen IC	2.Moderate	2	0	0	0	blank	blank	0															blank	2020-03-27	0	0	0	0
1816	0	Center_07	663	1	2020-03-25	0	6	1	2020-03-25	M	1	86	3	3	4	1	0	1	0	0	Geen IC	4.Critical/Fatal	5	1	1	1	blank	blank	0															blank		1	1	1	0
1817	0	Center_07	663	0	2020-03-25	2	6	1	2020-03-25	M	1	86	5	5	6	1	0	1	0	0	Geen IC	4.Critical/Fatal	5	1	1	1	blank	blank	0															blank		1	1	1	0
1818	0	Center_07	663	0	2020-03-25	4	6	1	2020-03-25	M	1	86	7	7	8	1	0	1	0	0	Geen IC	4.Critical/Fatal	5	1	1	1	blank	blank	0															blank		1	1	1	0
1819	0	Center_07	664	1	2020-03-24	0	2	1	2020-03-24	M	1	52	14	14	14	0	0	1	0	0	Geen IC	2.Moderate	2	0	0	0	blank	blank	0															blank	2020-03-26	0	0	0	0
1820	0	Center_07	664	0	2020-03-24	2	2	1	2020-03-24	M	1	52	16	16	16	0	0	1	0	0	Geen IC	2.Moderate	2	0	0	0	blank	blank	0															blank	2020-03-26	0	0	0	0
1821	0	Center_07	665	1	2020-03-25	0	5	1	2020-03-25	M	1	73	4	4	4	1	0	1	0	0	Geen IC	2.Moderate	2	0	0	0	blank	blank	0															blank	2020-03-30	0	0	0	0
1822	0	Center_07	665	0	2020-03-25	1	5	1	2020-03-25	M	1	73	5	5	6	1	0	1	0	0	Geen IC	2.Moderate	2	0	0	0	blank	blank	0															blank	2020-03-30	0	0	0	0
1823	0	Center_07	665	0	2020-03-25	2	5	1	2020-03-25	M	1	73	6	6	6	1	0	1	0	0	Geen IC	2.Moderate	2	0	0	0	blank	blank	0															blank	2020-03-30	0	0	0	0
1824	0	Center_07	665	0	2020-03-25	4	5	1	2020-03-25	M	1	73	8	8	8	0	0	1	0	0	Geen IC	2.Moderate	2	0	0	0	blank	blank	0															blank	2020-03-30	0	0	0	0
1825	0	Center_07	665	0	2020-03-25	5	5	1	2020-03-25	M	1	73	9	9	10	0	0	1	0	0	Geen IC	2.Moderate	2	0	0	0	blank	blank	0															blank	2020-03-30	0	0	0	0
1826	0	Center_07	666	1	2020-03-24	0	8	1	2020-03-24	M	1	68	3	3	4	1	0	0	1	1	Wel IC	4.Critical/Fatal	4	1	1	1	blank	blank	0															blank	2020-04-01	0	0	1	1
1827	0	Center_07	666	0	2020-03-24	2	8	1	2020-03-24	M	1	68	5	5	6	1	0	0	1	1	Wel IC	4.Critical/Fatal	4	1	1	1	blank	blank	0															blank	2020-04-01	0	0	1	1
1828	0	Center_07	666	0	2020-03-24	4	8	1	2020-03-24	M	1	68	7	7	8	1	0	0	1	1	Wel IC	4.Critical/Fatal	4	1	1	1	blank	blank	0															blank	2020-04-01	0	0	1	1
1829	0	Center_07	666	0	2020-03-24	6	8	1	2020-03-24	M	1	68	9	9	10	0	0	0	1	1	Wel IC	4.Critical/Fatal	4	1	1	1	blank	blank	0															blank	2020-04-01	0	0	1	1
1830	0	Center_07	667	1	2020-03-28	0	1	1	2020-03-28	M	1	68	14	14	14	0	0	0	1	1	Wel IC	4.Critical/Fatal	4	1	1	1	blank	blank	0															blank		0	0	0	0
1831	0	Center_07	668	1	2020-03-25	5	16	1	00/01/1900	M	1	78	4	4	4	1	0	0	1	1	Wel IC	4.Critical/Fatal	5	1	1	1	blank	blank	0															blank		2020-04-10	1	1	1
1832	0	Center_07	669	1	2020-03-26	4	7	1	2020-03-26	M	1	49	14	14	14	0	0	1	0	0	Geen IC	3.Severe	3	0	0	1	blank	blank	0															blank	2020-04-02	0	0	0	0
1833	0	Center_07	670	1	2020-03-27	0	3	1	2020-03-27	F	0	53	14	14	14	0	0	1	0	0	Geen IC	2.Moderate	2	0	0	0	blank	blank	0															blank	2020-03-30	0	0	0	0
1834	0	Center_07	670	0	2020-03-27	3	3	1	2020-03-27	F	0	53	17	18	18	0	0	1	0	0	Geen IC	2.Moderate	2	0	0	0	blank	blank	0															blank	2020-03-30	0	0	0	0
1835	0	Center_07	671	1	2020-03-27	0	shift	1	2020-03-27	M	1	76	4	4	4	1	0	1	0	0	Geen IC	3.Severe	3	0	0	1	blank	blank	0															blank	2020-03-27	0	0	0	0
1836	0	Center_07	672	1	2020-03-26	0	7	1	00/01/1900	M	1	75	15	16	16	0	0	1	0	0	Geen IC	4.Critical/Fatal	5	1	1	1	blank	blank	0															blank		2020-04-02	1	1	1
1837	0	Center_07	672	0	2020-03-26	1	7	1	00/01/1900	M	1	75	16	16	16	0	0	1	0	0	Geen IC	4.Critical/Fatal	5	1	1	1	blank	blank	0															blank		2020-04-02	1	1	1
1838	0	Center_07	672	0	2020-03-26	3	7	1	00/01/1900	M	1	75	18	18	18	0	0	1	0	0	Geen IC	4.Critical/Fatal	5	1	1	1	blank	blank	0															blank		2020-04-02	1	1	1
1839	0	Center_07	673	1	2020-03-27	0	3	1	00/01/1900	F	0	58	5	5	6	1	0	1	0	0	Geen IC	2.Moderate	2	0	0	0	blank	blank	0															blank	2020-03-30	0	0	0	0
1840	0	Center_07	673	0	2020-03-27	3	3	1	00/01/1900	F	0	58	8	8	8	0	0	1	0	0	Geen IC	2.Moderate	2	0	0	0	blank	blank	0															blank	2020-03-30	0	0	0	0
1841	0	Center_07	674	1	2020-03-27	0	3	1	2020-03-27	M	1	67	7	7	8	1	0	0	1	1	Wel IC	4.Critical/Fatal	5	1	1	1	blank	blank	0															blank		2020-03-30	1	1	1
1842	0	Center_07	674	0	2020-03-27	3	3	1	2020-03-27	M	1	67	10	10	10	0	0	0	1	1	Wel IC	4.Critical/Fatal	5	1	1	1	blank	blank	0															blank		2020-03-30	1	1	1
1843	0	Center_07	675	1	2020-03-29	0	8	1	2020-03-30	M	1	83	7	7	8	1	0	1	0	0	Geen IC	3.Severe	3	0	0	1	blank	blank	0															blank	2020-04-06	0	0	0	0
1844	0	Center_07	676	1	2020-03-27	0	7	1	2020-03-27	M	1	77	7	7	8	1	0	1	0	0	Geen IC	4.Critical/Fatal	5	1	1	1	blank	blank	0															blank		2020-04-03	1	1	1
1845	0	Center_07	676	0	2020-03-27	1	7	1	2020-03-27	M	1	77	8	8	8	0	0	1	0	0	Geen IC	4.Critical/Fatal	5	1	1	1	blank	blank	0															blank		2020-04-03	1	1	1
1846	0	Center_07	676	0	2020-03-27	3	7	1	2020-03-27	M	1	77	10	10	10	0	0	1	0	0	Geen IC	4.Critical/Fatal	5	1	1	1	blank	blank	0															blank		2020-04-03	1	1	1
1847	0	Center_07	677	1	2020-03-26	0	23	1	2020-03-26	M	1	82	14	14	14	0	0	1	0	0	Geen IC	4.Critical/Fatal	5	1	1	1	blank	blank	0															blank		2020-04-18	1	1	1
1848	0	Center_07	677	0	2020-03-26	2	23	1	2020-03-26	M	1	82	16	16	16	0	0	1	0	0	Geen IC	4.Critical/Fatal	5	1	1	1	blank	blank	0															blank		2020-04-18	1	1	1
1849	0	Center_07	677	0	2020-03-26	4	23	1	2020-03-26	M	1	82	18	18	18	0	0	1	0	0	Geen IC	4.Critical/Fatal	5	1	1	1	blank	blank	0															blank		2020-04-18	1	1	1
1850	0	Center_07	678	1	2020-03-27	0	7	1	2020-03-27	M	1	88	7	7	8	1	0	1	0	0	Geen IC	4.Critical/Fatal	5	1	1	1	blank	blank	0															blank		2020-04-03	1	1	1
1851	0	Center_07	678	0	2020-03-27	1	7	1	2020-03-27	M	1	88	8	8	8	0	0	1	0	0	Geen IC	4.Critical/Fatal	5	1	1	1	blank	blank	0															blank		2020-04-03	1	1	1
1852	0	Center_07	678	0	2020-03-27	3	7	1	2020-03-27	M	1	88	10	10	10	0	0	1	0	0	Geen IC	4.Critical/Fatal	5	1	1	1	blank	blank	0															blank		2020-04-03	1	1	1
1853	0	Center_07	679	1	2020-03-28	0	2	1	2020-03-28	F	0	62	10	10	10	0	0	1	0	0	Geen IC	2.Moderate	2	0	0	0	blank	blank	0															blank	2020-03-30	0	0	0	0
1854	0	Center_07	679	0	2020-03-28	2	2	1	2020-03-28	F	0	62	12	12	12	0	0	1	0	0	Geen IC	2.Moderate	2	0	0	0	blank	blank	0															blank	2020-03-30	0	0	0	0
1855	0	Center_07	680	1	2020-03-28	0	2	1	2020-03-28	M	1	72	5	5	6	1	0	1	0	0	Geen IC	2.Moderate	2	0	0	0	blank	blank	0															blank	2020-03-30	0	0	0	0
1856	0	Center_07	680	0	2020-03-28	2	2	1	2020-03-28	M	1	72	7	7	8	1	0	1	0	0	Geen IC	2.Moderate	2	0	0	0	blank	blank	0															blank	2020-03-30	0	0	0	0
1857	0	Center_07	681	1	2020-03-27	0	2	1	2020-03-27	M	1	68	9	9	10	0	0	1	0	0	Geen IC	2.Moderate	2	0	0	0	blank	blank	0															blank	2020-03-29	0	0	0	0
1858	0	Center_07	681	0	2020-03-27	2	2	1	2020-03-27	M	1	68	11	11	12	0	0	1	0	0	Geen IC	2.Moderate	2	0	0	0	blank	blank	0															blank	2020-03-29	0	0	0	0
1859	0	Center_07	682	1	2020-03-27	0	3	1	2020-03-27	F	0	63	7	7	8	1	0	1	0	0	Geen IC	2.Moderate	2	0	0	0	blank	blank	0															blank	2020-03-30	0	0	0	0
1860	0	Center_07	682	0	2020-03-27	1	3	1	2020-03-27	F	0	63	8	8	8	0	0	1	0	0	Geen IC	2.Moderate	2	0	0	0	blank	blank	0															blank	2020-03-30	0	0	0	0
1861	0	Center_07	682	0	2020-03-27	3	3	1	2020-03-27	F	0	63	10	10	10	0	0	1	0	0	Geen IC	2.Moderate	2	0	0	0	blank	blank	0															blank	2020-03-30	0	0	0	0
1862	0	Center_07	683	1	2020-03-22	0	10	1	2020-03-23	F	0	44	6	6	6	1	0	1	0	0	Geen IC	3.Severe	3	0	0	1	blank	blank	0															blank	2020-04-01	0	0	0	0
1863	0	Center_07	683	0	2020-03-22	5	10	1	2020-03-23	F	0	44	11	11	12	0	0	1	0	0	Geen IC	3.Severe	3	0	0	1	blank	blank	0															blank	2020-04-01	0	0	0	0
1864	0	Center_07	683	0	2020-03-22	6	10	1	2020-03-23	F	0	44	12	12	12	0	0	1	0	0	Geen IC	3.Severe	3	0	0	1	blank	blank	0															blank	2020-04-01	0	0	0	0
1865	0	Center_07	683	0	2020-03-22	7	10	1	2020-03-23	F	0	44	13	13	14	0	0	1	0	0	Geen IC	3.Severe	3	0	0	1	blank	blank	0															blank	2020-04-01	0	0	0	0
1866	0	Center_07	684	1	2020-03-27	0	3	1	2020-03-27	F	0	69	2	2	2	1	0	1	0	0	Geen IC	2.Moderate	2	0	0	0	blank	blank	0															blank	2020-03-30	0	0	0	0
1867	0	Center_07	684	0	2020-03-27	3	3	1	2020-03-27	F	0	69	5	5	6	1	0	1	0	0	Geen IC	2.Moderate	2	0	0	0	blank	blank	0															blank	2020-03-30	0	0	0	0
1868	0	Center_07	685	1	2020-03-26	0	3	1	2020-03-28	M	1	75	10	10	10	0	0	1	0	0	Geen IC	4.Critical/Fatal	5	1	1	1	blank	blank	0															blank		2020-03-29	1	1	1
1869	0	Center_07	685	0	2020-03-26	1	3	1	2020-03-28	M	1	75	11	11	12	0	0	1	0	0	Geen IC	4.Critical/Fatal	5	1	1	1	blank	blank	0															blank		2020-03-29	1	1	1
1870	0	Center_07	685	0	2020-03-26	3	3	1	2020-03-28	M	1	75	13	13	14	0	0	1	0	0	Geen IC	4.Critical/Fatal	5	1	1	1	blank	blank	0															blank		2020-03-29	1	1	1
1871	0	Center_07	686	1	2020-03-26	0	4	1	2020-03-27	M	1	79	14	14	14	0	0	1	0	0	Geen IC	4.Critical/Fatal	5	1	1	1	blank	blank	0															blank		2020-03-30	1	1	1
1872	0	Center_07	686	0	2020-03-26	1	4	1	2020-03-27	M	1	79	15	16	16	0	0	1	0	0	Geen IC	4.Critical/Fatal	5	1	1	1	blank	blank	0															blank		2020-03-30	1	1	1
1873	0	Center_07	686	0	2020-03-26	2	4	1	2020-03-27	M	1	79	16	16	16	0	0	1	0	0	Geen IC	4.Critical/Fatal	5	1	1	1	blank	blank	0															blank		2020-03-30	1	1	1
1874	0	Center_07	686	0	2020-03-26	4	4	1	2020-03-27	M	1	79	18	18	18	0	0	1	0	0	Geen IC	4.Critical/Fatal	5	1	1	1	blank	blank	0															blank		2020-03-30	1	1	1
1875	0	Center_07	687	1	2020-03-27	0	3	1	2020-03-27	M	1	77	20	20	20	0	0	1	0	0	Geen IC	4.Critical/Fatal	5	1	1	1	blank	blank	0															blank		2020-03-30	1	1	1
1876	0	Center_07	687	0	2020-03-27	3	3	1	2020-03-27	M	1	77	23	24	24	0	0	1	0	0	Geen IC	4.Critical/Fatal	5	1	1	1	blank	blank	0															blank		2020-03-30	1	1	1
1877	0	Center_07	688	1	2020-03-29	0	1	1	2020-03-29	M	1	67	14	14	14	0	0	1	0	0	Geen IC	2.Moderate	2	0	0	0	blank	blank	0															blank	2020-03-30	0	0	0	0
1878	0	Center_07	688	0	2020-03-29	1	1	1	2020-03-29	M	1	67	15	16	16	0	0	1	0	0	Geen IC	2.Moderate	2	0	0	0	blank	blank	0															blank	2020-03-30	0	0	0	0
1879	0	Center_07	689	1	2020-03-27	1	11	1	2020-03-27	M	1	87	3	3	4	1	0	1	0	0	Geen IC	3.Severe	3	0	0	1	blank	blank	0															blank	2020-04-07	0	0	0	0
1880	0	Center_07	689	0	2020-03-27	3	11	1	2020-03-27	M	1	87	5	5	6	1	0	1	0	0	Geen IC	3.Severe	3	0	0	1	blank	blank	0															blank	2020-04-07	0	0	0	0
1881	0	Center_07	690	1	2020-03-28	0	7	1	2020-03-28	F	0	85	2	2	2	1	0	1	0	0	Geen IC	4.Critical/Fatal	5	1	1	1	blank	blank	0															blank		2020-04-04	1	1	1
1882	0	Center_07	690	0	2020-03-28	2	7	1	2020-03-28	F	0	85	4	4	4	1	0	1	0	0	Geen IC	4.Critical/Fatal	5	1	1	1	blank	blank	0															blank		2020-04-04	1	1	1
1883	0	Center_07	691	1	2020-03-28	1	2	1	2020-03-29	M	1	64	11	11	12	0	0	1	0	0	Geen IC	2.Moderate	2	0	0	0	blank	blank	0															blank	2020-03-30	0	0	0	0
1884	0	Center_07	691	0	2020-03-28	2	2	1	2020-03-29	M	1	64	12	12	12	0	0	1	0	0	Geen IC	2.Moderate	2	0	0	0	blank	blank	0															blank	2020-03-30	0	0	0	0
1885	0	Center_07	692	1	2020-03-28	0	2	1	2020-03-28	F	0	67	7	7	8	1	0	1	0	0	Geen IC	2.Moderate	2	0	0	0	blank	blank	0															blank	2020-03-30	0	0	0	0
1886	0	Center_07	692	0	2020-03-28	2	2	1	2020-03-28	F	0	67	9	9	10	0	0	1	0	0	Geen IC	2.Moderate	2	0	0	0	blank	blank	0															blank	2020-03-30	0	0	0	0
1887	0	Center_07	693	1	2020-03-27	0	5	1	2020-03-27	F	0	58	10	10	10	0	0	0	1	1	Wel IC	4.Critical/Fatal	4	1	1	1	blank	blank	0															blank	2020-04-01	0	0	1	1
1888	0	Center_07	693	0	2020-03-27	3	5	1	2020-03-27	F	0	58	13	13	14	0	0	0	1	1	Wel IC	4.Critical/Fatal	4	1	1	1	blank	blank	0															blank	2020-04-01	0	0	1	1
1889	0	Center_07	694	1	2020-03-26	0	3	1	2020-03-26	F	0	56	8	8	8	0	0	1	0	0	Geen IC	2.Moderate	2	0	0	0	blank	blank	0															blank	2020-03-29	0	0	0	0
1890	0	Center_07	694	0	2020-03-26	1	3	1	2020-03-26	F	0	56	9	9	10	0	0	1	0	0	Geen IC	2.Moderate	2	0	0	0	blank	blank	0															blank	2020-03-29	0	0	0	0
1891	0	Center_07	694	0	2020-03-26	3	3	1	2020-03-26	F	0	56	11	11	12	0	0	1	0	0	Geen IC	2.Moderate	2	0	0	0	blank	blank	0															blank	2020-03-29	0	0	0	0
1892	0	Center_08	695	1	2020-03-18	3	11	1	2020-03-18	M	1	66	8	8	8	0	0	0	1	1	blank	4.Critical/Fatal	5	1	1	1	blank	blank	censored	1	1	0	0	0	1	0	0	0	0	0	0	0	0	blank		2020-03-29	1	1	1
1893	0	Center_08	695	0	2020-03-18	4	11	1	2020-03-18	M	1	66	9	9	10	0	0	0	1	1	blank	4.Critical/Fatal	5	1	1	1	blank	blank	censored	1	1	0	0	0	1	0	0	0	0	0	0	0	0	blank		2020-03-29	1	1	1
1894	0	Center_08	695	0	2020-03-18	5	11	1	2020-03-18	M	1	66	10	10	10	0	0	0	1	1	blank	4.Critical/Fatal	5	1	1	1	blank	blank	censored	1	1	0	0	0	1	0	0	0	0	0	0	0	0	blank		2020-03-29	1	1	1
1895	0	Center_08	695	0	2020-03-18	6	11	1	2020-03-18	M	1	66	11	11	12	0	0	0	1	1	blank	4.Critical/Fatal	5	1	1	1	blank	blank	censored	1	1	0	0	0	1	0	0	0	0	0	0	0	0	blank		2020-03-29	1	1	1
1896	0	Center_08	695	0	2020-03-18	7	11	1	2020-03-18	M	1	66	12	12	12	0	0	0	1	1	blank	4.Critical/Fatal	5	1	1	1	blank	blank	censored	1	1	0	0	0	1	0	0	0	0	0	0	0	0	blank		2020-03-29	1	1	1
1897	0	Center_08	696	1	2020-02-28	3	26	1	2020-02-28	F	0	49	14	14	14	0	0	0	1	1	blank	4.Critical/Fatal	4	1	1	1	blank	blank	censored	1	0	1	1	0	0	1	0	0	0	0	0	0	0	blank	2020-03-25	0	0	1	1
1898	0	Center_08	696	0	2020-02-28	3	26	1	2020-02-28	F	0	49	16	16	16	0	0	0	1	1	blank	4.Critical/Fatal	4	1	1	1	blank	blank	censored	1	0	1	1	0	0	1	0	0	0	0	0	0	0	blank	2020-03-25	0	0	1	1
1899	0	Center_08	696	0	2020-02-28	3	26	1	2020-02-28	F	0	49	16	16	16	0	0	0	1	1	blank	4.Critical/Fatal	4	1	1	1	blank	blank	censored	1	0	1	1	0	0	1	0	0	0	0	0	0	0	blank	2020-03-25	0	0	1	1
1900	0	Center_08	696	0	2020-02-28	3	26	1	2020-02-28	F	0	49	18	18	18	0	0	0	1	1	blank	4.Critical/Fatal	4	1	1	1	blank	blank	censored	1	0	1	1	0	0	1	0	0	0	0	0	0	0	blank	2020-03-25	0	0	1	1
1901	0	Center_08	696	0	2020-02-28	20	26	0	2020-02-28	F	0	49	34	29-46	29-46		0	1	0	1	blank	4.Critical/Fatal	4	1	1	1	blank	blank	censored	1	0	1	1	0	0	1	0	0	0	0	0	0	0	blank	2020-03-25	0	0	1	1
1902	0	Center_08	696	0	2020-02-28	21	26	0	2020-02-28	F	0	49	35	29-46	29-46		0	1	0	1	blank	4.Critical/Fatal	4	1	1	1	blank	blank	censored	1	0	1	1	0	0	1	0	0	0	0	0	0	0	blank	2020-03-25	0	0	1	1
1903	0	Center_08	696	0	2020-02-28	22	26	0	2020-02-28	F	0	49	36	29-46	29-46		0	1	0	1	blank	4.Critical/Fatal	4	1	1	1	blank	blank	censored	1	0	1	1	0	0	1	0	0	0	0	0	0	0	blank	2020-03-25	0	0	1	1
1904	0	Center_08	696	0	2020-02-28	23	26	0	2020-02-28	F	0	49	37	29-46	29-46		0	1	0	1	blank	4.Critical/Fatal	4	1	1	1	blank	blank	censored	1	0	1	1	0	0	1	0	0	0	0	0	0	0	blank	2020-03-25	0	0	1	1
1905	0	Center_08	696	0	2020-02-28	24	26	0	2020-02-28	F	0	49	38	29-46	29-46		0	1	0	1	blank	4.Critical/Fatal	4	1	1	1	blank	blank	censored	1	0	1	1	0	0	1	0	0	0	0	0	0	0	blank	2020-03-25	0	0	1	1
1906	0	Center_08	697	1	2020-03-22	2	8	1	2020-03-25	M	1	61	4	4	4	1	0	1	0	0	blank	3.Severe	3	0	0	1	blank	blank	censored	1	1	0	0	0	0	0	0	0	0	0	0	0	0	blank	2020-03-30	0	0	0	0
1907	0	Center_08	697	0	2020-03-22	3	8	1	2020-03-25	M	1	61	5	5	6	1	0	1	0	0	blank	3.Severe	3	0	0	1	blank	blank	censored	1	1	0	0	0	0	0	0	0	0	0	0	0	0	blank	2020-03-30	0	0	0	0
1908	0	Center_08	698	1	2020-02-28	20	38	0	2020-02-22	M	1	56	28	28	28	0	0	0	1	1	blank	4.Critical/Fatal	4	1	1	1	blank	blank	censored	1	0	1	1	0	0	0	0	0	0	0	0	1	0	blank	2020-04-06	0	0	1	1
1909	0	Center_08	698	0	2020-02-28	21	38	0	2020-02-22	M	1	56	29	29-46	29-46		0	0	1	1	blank	4.Critical/Fatal	4	1	1	1	blank	blank	censored	1	0	1	1	0	0	0	0	0	0	0	0	1	0	blank	2020-04-06	0	0	1	1
1910	0	Center_08	698	0	2020-02-28	22	38	0	2020-02-22	M	1	56	30	29-46	29-46		0	0	1	1	blank	4.Critical/Fatal	4	1	1	1	blank	blank	censored	1	0	1	1	0	0	0	0	0	0	0	0	1	0	blank	2020-04-06	0	0	1	1
1911	0	Center_08	698	0	2020-02-28	23	38	0	2020-02-22	M	1	56	31	29-46	29-46		0	0	1	1	blank	4.Critical/Fatal	4	1	1	1	blank	blank	censored	1	0	1	1	0	0	0	0	0	0	0	0	1	0	blank	2020-04-06	0	0	1	1
1912	0	Center_08	698	0	2020-02-28	24	38	0	2020-02-22	M	1	56	32	29-46	29-46		0	0	1	1	blank	4.Critical/Fatal	4	1	1	1	blank	blank	censored	1	0	1	1	0	0	0	0	0	0	0	0	1	0	blank	2020-04-06	0	0	1	1
1913	0	Center_08	698	0	2020-02-28	25	38	0	2020-02-22	M	1	56	33	29-46	29-46		0	0	1	1	blank	4.Critical/Fatal	4	1	1	1	blank	blank	censored	1	0	1	1	0	0	0	0	0	0	0	0	1	0	blank	2020-04-06	0	0	1	1
1914	0	Center_08	698	0	2020-02-28	26	38	0	2020-02-22	M	1	56	34	29-46	29-46		0	0	1	1	blank	4.Critical/Fatal	4	1	1	1	blank	blank	censored	1	0	1	1	0	0	0	0	0	0	0	0	1	0	blank	2020-04-06	0	0	1	1
1915	No Covid	Center_08	699	1	2020-02-23	29	32	0	2020-03-22	M	1	85	11	11	12	0	0	1	0	0	blank	4.Critical/Fatal	5	1	1	1	blank	blank	0	0	0	0	0	0	0	0	0	0	0	0	0	0	0	blank		2020-03-26	1	1	1
1916	0	Center_08	700	1	2020-03-24	0	14	1	2020-03-24	M	1	62	2	2	2	1	0	1	0	0	blank	3.Severe	3	0	0	1	blank	blank	censored	1	0	1	1	1	0	1	0	0	0	0	0	0	0	blank	2020-04-07	0	0	0	0
1917	Due to comorbidity	Center_08	701	1	2020-03-09	10	17	0	2020-03-09	M	1	65	25	26	26	0	0	0	1	1	exclude comor	4.Critical/Fatal	5	1	1	1	blank	blank	censored	1	1	0	0	0	0	1	0	0	0	0	0	0	0	blank		2020-03-26	1	1	1
1918	Due to comorbidity	Center_08	701	0	2020-03-09	11	17	0	2020-03-09	M	1	65	26	26	26	0	0	0	1	1	exclude comor	4.Critical/Fatal	5	1	1	1	blank	blank	censored	1	1	0	0	0	0	1	0	0	0	0	0	0	0	blank		2020-03-26	1	1	1
1919	Due to comorbidity	Center_08	701	0	2020-03-09	12	17	0	2020-03-09	M	1	65	27	28	28	0	0	0	1	1	exclude comor	4.Critical/Fatal	5	1	1	1	blank	blank	censored	1	1	0	0	0	0	1	0	0	0	0	0	0	0	blank		2020-03-26	1	1	1
1920	Due to comorbidity	Center_08	701	0	2020-03-09	13	17	0	2020-03-09	M	1	65	28	28	28	0	0	0	1	1	exclude comor	4.Critical/Fatal	5	1	1	1	blank	blank	censored	1	1	0	0	0	0	1	0	0	0	0	0	0	0	blank		2020-03-26	1	1	1
1921	Due to comorbidity	Center_08	701	0	2020-03-09	14	17	0	2020-03-09	M	1	65	29	29-46	29-46		0	0	1	1	exclude comor	4.Critical/Fatal	5	1	1	1	blank	blank	censored	1	1	0	0	0	0	1	0	0	0	0	0	0	0	blank		2020-03-26	1	1	1
1922	Due to comorbidity	Center_08	701	0	2020-03-09	15	17	0	2020-03-09	M	1	65	30	29-46	29-46		0	0	1	1	exclude comor	4.Critical/Fatal	5	1	1	1	blank	blank	censored	1	1	0	0	0	0	1	0	0	0	0	0	0	0	blank		2020-03-26	1	1	1
1923	Due to comorbidity	Center_08	701	0	2020-03-09	16	17	0	2020-03-09	M	1	65	31	29-46	29-46		0	0	1	1	exclude comor	4.Critical/Fatal	5	1	1	1	blank	blank	censored	1	1	0	0	0	0	1	0	0	0	0	0	0	0	blank		2020-03-26	1	1	1
1924	age	Center_08	702	1	2020-03-12	7	15	1	2020-03-09	M	1	16	10	10	10	0	0	0	1	1	blank	4.Critical/Fatal	4	1	1	1	blank	blank	0	0	0	0	0	0	0	0	0	0	0	0	0	0	0	blank	2020-03-27	0	0	1	1
1925	age	Center_08	702	0	2020-03-12	8	15	0	2020-03-09	M	1	16	11	11	12	0	0	0	1	1	blank	4.Critical/Fatal	4	1	1	1	blank	blank	0	0	0	0	0	0	0	0	0	0	0	0	0	0	0	blank	2020-03-27	0	0	1	1
1926	age	Center_08	702	0	2020-03-12	9	15	0	2020-03-09	M	1	16	12	12	12	0	0	0	1	1	blank	4.Critical/Fatal	4	1	1	1	blank	blank	0	0	0	0	0	0	0	0	0	0	0	0	0	0	0	blank	2020-03-27	0	0	1	1
1927	age	Center_08	702	0	2020-03-12	11	15	0	2020-03-09	M	1	16	14	14	14	0	0	1	0	1	blank	4.Critical/Fatal	4	1	1	1	blank	blank	0	0	0	0	0	0	0	0	0	0	0	0	0	0	0	blank	2020-03-27	0	0	1	1
1928	0	Center_08	703	1	2020-03-17	2	17	1	2020-03-13	F	0	59	9	9	10	0	0	0	1	1	blank	4.Critical/Fatal	4	1	1	1	blank	blank	censored	1	0	1	0	0	0	0	0	0	0	0	0	0	0	blank	2020-04-03	0	0	1	1
1929	0	Center_08	703	0	2020-03-17	3	17	1	2020-03-13	F	0	59	10	10	10	0	0	0	1	1	blank	4.Critical/Fatal	4	1	1	1	blank	blank	censored	1	0	1	0	0	0	0	0	0	0	0	0	0	0	blank	2020-04-03	0	0	1	1
1930	0	Center_08	703	0	2020-03-17	4	17	1	2020-03-13	F	0	59	11	11	12	0	0	0	1	1	blank	4.Critical/Fatal	4	1	1	1	blank	blank	censored	1	0	1	0	0	0	0	0	0	0	0	0	0	0	blank	2020-04-03	0	0	1	1
1931	0	Center_08	703	0	2020-03-17	5	17	1	2020-03-13	F	0	59	12	12	12	0	0	0	1	1	blank	4.Critical/Fatal	4	1	1	1	blank	blank	censored	1	0	1	0	0	0	0	0	0	0	0	0	0	0	blank	2020-04-03	0	0	1	1
1932	0	Center_08	703	0	2020-03-17	6	17	1	2020-03-13	F	0	59	13	13	14	0	0	0	1	1	blank	4.Critical/Fatal	4	1	1	1	blank	blank	censored	1	0	1	0	0	0	0	0	0	0	0	0	0	0	blank	2020-04-03	0	0	1	1
1933	0	Center_08	703	0	2020-03-17	7	17	1	2020-03-13	F	0	59	14	14	14	0	0	0	1	1	blank	4.Critical/Fatal	4	1	1	1	blank	blank	censored	1	0	1	0	0	0	0	0	0	0	0	0	0	0	blank	2020-04-03	0	0	1	1
1934	0	Center_08	703	0	2020-03-17	8	17	0	2020-03-13	F	0	59	15	16	16	0	0	0	1	1	blank	4.Critical/Fatal	4	1	1	1	blank	blank	censored	1	0	1	0	0	0	0	0	0	0	0	0	0	0	blank	2020-04-03	0	0	1	1
1935	0	Center_08	704	1	2020-03-17	2	59	1	2020-03-13	M	1	72	12	12	12	0	0	0	1	1	blank	4.Critical/Fatal	4	1	1	1	blank	blank	censored	1	0	0	1	0	0	0	0	0	0	0	0	1	0	blank	2020-05-15	0	0	1	1
1936	0	Center_08	704	0	2020-03-17	3	59	1	2020-03-13	M	1	72	13	13	14	0	0	0	1	1	blank	4.Critical/Fatal	4	1	1	1	blank	blank	censored	1	0	0	1	0	0	0	0	0	0	0	0	1	0	blank	not yet	0	0	1	1
1937	0	Center_08	704	0	2020-03-17	4	59	1	2020-03-13	M	1	72	14	14	14	0	0	0	1	1	blank	4.Critical/Fatal	4	1	1	1	blank	blank	censored	1	0	0	1	0	0	0	0	0	0	0	0	1	0	blank	not yet	0	0	1	1
1938	0	Center_08	704	0	2020-03-17	5	59	1	2020-03-13	M	1	72	15	16	16	0	0	0	1	1	blank	4.Critical/Fatal	4	1	1	1	blank	blank	censored	1	0	0	1	0	0	0	0	0	0	0	0	1	0	blank	not yet	0	0	1	1
1939	0	Center_08	704	0	2020-03-17	6	59	1	2020-03-13	M	1	72	16	16	16	0	0	0	1	1	blank	4.Critical/Fatal	4	1	1	1	blank	blank	censored	1	0	0	1	0	0	0	0	0	0	0	0	1	0	blank	not yet	0	0	1	1
1940	0	Center_08	704	0	2020-03-17	7	59	1	2020-03-13	M	1	72	17	18	18	0	0	0	1	1	blank	4.Critical/Fatal	4	1	1	1	blank	blank	censored	1	0	0	1	0	0	0	0	0	0	0	0	1	0	blank	not yet	0	0	1	1
1941	0	Center_08	704	0	2020-03-17	8	59	0	2020-03-13	M	1	72	18	18	18	0	0	0	1	1	blank	4.Critical/Fatal	4	1	1	1	blank	blank	censored	1	0	0	1	0	0	0	0	0	0	0	0	1	0	blank	not yet	0	0	1	1
1942	0	Center_08	705	1	2020-03-19	1	25	1	2020-03-16	F	0	54	8	8	8	0	0	0	1	1	blank	4.Critical/Fatal	4	1	1	1	blank	blank	0	0	0	0	0	0	0	0	0	0	0	0	0	0	0	blank	2020-04-13	0	0	1	1
1943	0	Center_08	705	0	2020-03-19	3	25	1	2020-03-16	F	0	54	10	10	10	0	0	0	1	1	blank	4.Critical/Fatal	4	1	1	1	blank	blank	0	0	0	0	0	0	0	0	0	0	0	0	0	0	0	blank	2020-04-13	0	0	1	1
1944	0	Center_08	705	0	2020-03-19	4	25	1	2020-03-16	F	0	54	11	11	12	0	0	0	1	1	blank	4.Critical/Fatal	4	1	1	1	blank	blank	0	0	0	0	0	0	0	0	0	0	0	0	0	0	0	blank	2020-04-13	0	0	1	1
1945	0	Center_08	705	0	2020-03-19	5	25	1	2020-03-16	F	0	54	12	12	12	0	0	0	1	1	blank	4.Critical/Fatal	4	1	1	1	blank	blank	0	0	0	0	0	0	0	0	0	0	0	0	0	0	0	blank	2020-04-13	0	0	1	1
1946	0	Center_08	705	0	2020-03-19	6	25	1	2020-03-16	F	0	54	13	13	14	0	0	0	1	1	blank	4.Critical/Fatal	4	1	1	1	blank	blank	0	0	0	0	0	0	0	0	0	0	0	0	0	0	0	blank	2020-04-13	0	0	1	1
1947	0	Center_08	706	1	2020-03-19	5	9	1	2020-03-19	M	1	68	14	14	14	0	0	1	0	0	blank	3.Severe	3	0	0	1	blank	blank	0	0	0	0	0	0	0	0	0	0	0	0	0	0	0	blank	2020-03-28	0	0	0	0
1948	0	Center_08	707	1	2020-03-19	3	20	1	2020-03-19	M	1	42	8	8	8	0	0	1	0	0	blank	3.Severe	3	0	0	1	blank	blank	0	0	0	0	0	0	0	0	0	0	0	0	0	0	0	blank	2020-04-08	0	0	0	0
1949	0	Center_08	707	0	2020-03-19	5	20	1	2020-03-19	M	1	42	10	10	10	0	0	1	0	0	blank	3.Severe	3	0	0	1	blank	blank	0	0	0	0	0	0	0	0	0	0	0	0	0	0	0	blank	2020-04-08	0	0	0	0
1950	0	Center_08	708	1	2020-03-20	0	0	1	2020-03-20	M	1	58	8	8	8	0	1	0	0	1	Please check severity	1.Mild	1	0	0	0	blank	blank	0	0	0	0	0	0	0	0	0	0	0	0	0	0	0	blank		0	0	0	0
1951	0	Center_08	709	1	2020-03-21	0	16	1	2020-03-23	M	1	74	11	11	12	0	0	1	0	1	blank	4.Critical/Fatal	4	1	1	1	blank	blank	censored	1	1	0	1	0	1	0	0	1	0	0	0	1	0	blank	2020-04-06	0	0	1	1
1952	0	Center_08	709	0	2020-03-21	1	16	1	2020-03-23	M	1	74	12	12	12	0	0	0	1	1	blank	4.Critical/Fatal	4	1	1	1	blank	blank	censored	1	1	0	1	0	1	0	0	1	0	0	0	1	0	blank	2020-04-06	0	0	1	1
1953	0	Center_08	709	0	2020-03-21	2	16	1	2020-03-23	M	1	74	13	13	14	0	0	0	1	1	blank	4.Critical/Fatal	4	1	1	1	blank	blank	censored	1	1	0	1	0	1	0	0	1	0	0	0	1	0	blank	2020-04-06	0	0	1	1
1954	0	Center_08	709	0	2020-03-21	3	16	1	2020-03-23	M	1	74	14	14	14	0	0	0	1	1	blank	4.Critical/Fatal	4	1	1	1	blank	blank	censored	1	1	0	1	0	1	0	0	1	0	0	0	1	0	blank	2020-04-06	0	0	1	1
1955	0	Center_08	709	0	2020-03-21	4	16	1	2020-03-23	M	1	74	15	16	16	0	0	0	1	1	blank	4.Critical/Fatal	4	1	1	1	blank	blank	censored	1	1	0	1	0	1	0	0	1	0	0	0	1	0	blank	2020-04-06	0	0	1	1
1956	0	Center_08	710	1	2020-03-21	1	10	1	2020-03-21	M	1	68	6	6	6	1	0	0	1	1	blank	4.Critical/Fatal	5	1	1	1	blank	blank	censored	1	1	0	0	0	0	0	0	0	0	0	0	0	0	blank		2020-03-31	1	1	1
1957	0	Center_08	710	0	2020-03-21	1	10	1	2020-03-21	M	1	68	6	6	6	1	0	0	1	1	blank	4.Critical/Fatal	5	1	1	1	blank	blank	censored	1	1	0	0	0	0	0	0	0	0	0	0	0	0	blank		2020-03-31	1	1	1
1958	0	Center_08	710	0	2020-03-21	2	10	1	2020-03-21	M	1	68	7	7	8	1	0	0	1	1	blank	4.Critical/Fatal	5	1	1	1	blank	blank	censored	1	1	0	0	0	0	0	0	0	0	0	0	0	0	blank		2020-03-31	1	1	1
1959	0	Center_08	710	0	2020-03-21	4	10	1	2020-03-21	M	1	68	9	9	10	0	0	0	1	1	blank	4.Critical/Fatal	5	1	1	1	blank	blank	censored	1	1	0	0	0	0	0	0	0	0	0	0	0	0	blank		2020-03-31	1	1	1
1960	0	Center_08	711	1	2020-03-21	3	26	1	2020-03-21	F	0	73	9	9	10	0	0	0	1	1	blank	4.Critical/Fatal	4	1	1	1	blank	blank	censored	1	1	0	0	0	0	0	0	0	0	0	0	1	0	blank	2020-04-16	0	0	1	1
1961	0	Center_08	711	0	2020-03-21	3	26	1	2020-03-21	F	0	73	9	9	10	0	0	0	1	1	blank	4.Critical/Fatal	4	1	1	1	blank	blank	censored	1	1	0	0	0	0	0	0	0	0	0	0	1	0	blank	2020-04-16	0	0	1	1
1962	0	Center_08	711	0	2020-03-21	4	26	1	2020-03-21	F	0	73	10	10	10	0	0	0	1	1	blank	4.Critical/Fatal	4	1	1	1	blank	blank	censored	1	1	0	0	0	0	0	0	0	0	0	0	1	0	blank	2020-04-16	0	0	1	1
1963	0	Center_08	712	1	2020-03-21	0	25	1	2020-03-16	F	0	62	10	10	10	0	0	0	1	1	blank	4.Critical/Fatal	4	1	1	1	blank	blank	censored	1	0	0	0	1	1	0	0	0	0	0	0	0	0	blank	2020-04-15	0	0	1	1
1964	0	Center_08	712	0	2020-03-21	1	25	1	2020-03-16	F	0	62	11	11	12	0	0	0	1	1	blank	4.Critical/Fatal	4	1	1	1	blank	blank	censored	1	0	0	0	1	1	0	0	0	0	0	0	0	0	blank	2020-04-15	0	0	1	1
1965	0	Center_08	712	0	2020-03-21	2	25	1	2020-03-16	F	0	62	12	12	12	0	0	0	1	1	blank	4.Critical/Fatal	4	1	1	1	blank	blank	censored	1	0	0	0	1	1	0	0	0	0	0	0	0	0	blank	2020-04-15	0	0	1	1
1966	0	Center_08	712	0	2020-03-21	3	25	1	2020-03-16	F	0	62	13	13	14	0	0	0	1	1	blank	4.Critical/Fatal	4	1	1	1	blank	blank	censored	1	0	0	0	1	1	0	0	0	0	0	0	0	0	blank	2020-04-15	0	0	1	1
1967	0	Center_08	712	0	2020-03-21	4	25	1	2020-03-16	F	0	62	14	14	14	0	0	0	1	1	blank	4.Critical/Fatal	4	1	1	1	blank	blank	censored	1	0	0	0	1	1	0	0	0	0	0	0	0	0	blank	2020-04-15	0	0	1	1
1968	0	Center_08	713	1	2020-03-23	0	0	1	2020-03-23	F	0	18	4	4	4	1	1	0	0	1	blank	1.Mild	1	0	0	0	blank	blank	0	0	0	0	0	0	0	0	0	0	0	0	0	0	0	blank		0	0	0	0
1969	0	Center_08	714	1	2020-03-20	3	19	1	2020-03-20	M	1	83	6	6	6	1	0	1	0	0	blank	3.Severe	3	0	0	1	blank	blank	0	0	0	0	0	0	0	0	0	0	0	0	0	0	0	blank	2020-04-08	0	0	0	0
1970	0	Center_08	715	1	2020-03-22	1	16	1	2020-03-20	M	1	74	12	12	12	0	0	1	0	0	blank	3.Severe	3	0	0	1	blank	blank	censored	1	0	0	0	0	1	0	0	0	0	0	0	0	0	blank	2020-04-07	0	0	0	0
1971	0	Center_08	716	1	2020-03-22	3	2	1	2020-03-21	M	1	77	11	11	12	0	0	1	0	0	blank	2.Moderate	2	0	0	0	blank	blank	censored	1	0	0	0	1	0	0	0	0	0	0	0	0	0	blank	2020-03-24	0	0	0	0
1972	0	Center_08	717	1	2020-03-23	0	22	1	2020-03-23	M	1	61	7	7	8	1	0	0	1	1	blank	4.Critical/Fatal	4	1	1	1	blank	blank	censored	1	0	0	0	0	0	0	0	0	0	0	0	0	0	blank	2020-04-18	0	0	1	1
1973	0	Center_08	717	0	2020-03-23	0	22	1	2020-03-23	M	1	61	7	7	8	1	0	0	1	1	blank	4.Critical/Fatal	4	1	1	1	blank	blank	censored	1	0	0	0	0	0	0	0	0	0	0	0	0	0	blank	not yet	0	0	1	1
1974	0	Center_08	717	0	2020-03-23	1	22	1	2020-03-23	M	1	61	8	8	8	0	0	0	1	1	blank	4.Critical/Fatal	4	1	1	1	blank	blank	censored	1	0	0	0	0	0	0	0	0	0	0	0	0	0	blank	not yet	0	0	1	1
1975	0	Center_08	717	0	2020-03-23	2	22	1	2020-03-23	M	1	61	9	9	10	0	0	0	1	1	blank	4.Critical/Fatal	4	1	1	1	blank	blank	censored	1	0	0	0	0	0	0	0	0	0	0	0	0	0	blank	not yet	0	0	1	1
1976	0	Center_08	718	1	2020-03-23	0	46	1	2020-03-22	M	1	61	5	5	6	1	0	0	1	1	blank	4.Critical/Fatal	4	1	1	1	blank	blank	censored	1	0	1	1	0	0	0	0	0	0	0	0	1	0	blank	2020-05-08	0	0	1	1
1977	0	Center_08	718	0	2020-03-23	1	46	1	2020-03-22	M	1	61	6	6	6	1	0	0	1	1	blank	4.Critical/Fatal	4	1	1	1	blank	blank	censored	1	0	1	1	0	0	0	0	0	0	0	0	1	0	blank	not yet	0	0	1	1
1978	0	Center_08	718	0	2020-03-23	2	46	1	2020-03-22	M	1	61	7	7	8	1	0	0	1	1	blank	4.Critical/Fatal	4	1	1	1	blank	blank	censored	1	0	1	1	0	0	0	0	0	0	0	0	1	0	blank	not yet	0	0	1	1
1979	0	Center_08	719	1	2020-03-24	0	15	1	2020-03-23	F	0	69	16	16	16	0	0	1	0	0	blank	3.Severe	3	0	0	1	blank	blank	censored	1	0	1	1	0	0	0	0	0	0	0	0	0	0	blank	2020-04-08	0	0	0	0
1980	0	Center_08	720	1	2020-03-24	0	7	1	2020-03-24	M	1	74	7	7	8	1	0	1	0	0	blank	3.Severe	3	0	0	1	blank	blank	censored	1	0	0	0	0	0	0	1	0	0	0	0	0	0	blank	2020-03-31	0	0	0	0
1981	0	Center_08	721	1	2020-03-24	0	36	1	2020-03-19	F	0	76	13	13	14	0	0	0	1	1	blank	4.Critical/Fatal	4	1	1	1	blank	blank	censored	1	1	1	0	0	0	0	0	0	0	0	0	1	0	blank	2020-04-29	0	0	1	1
1982	0	Center_08	721	0	2020-03-24	1	36	1	2020-03-19	F	0	76	14	14	14	0	0	0	1	1	blank	4.Critical/Fatal	4	1	1	1	blank	blank	censored	1	1	1	0	0	0	0	0	0	0	0	0	1	0	blank	not yet	0	0	1	1
1983	0	Center_08	722	1	2020-03-24	0	14	1	2020-03-24	M	1	61	8	8	8	0	0	1	0	0	blank	3.Severe	3	0	0	1	blank	blank	0	0	0	0	0	0	0	0	0	0	0	0	0	0	0	blank	2020-04-07	0	0	0	0
1984	0	Center_08	723	1	2020-03-24	0	22	1	2020-03-19	M	1	70	9	9	10	0	0	0	1	1	blank	4.Critical/Fatal	4	1	1	1	blank	blank	censored	1	1	0	1	0	1	0	0	0	0	0	0	0	0	blank	2020-04-15	0	0	1	1
1985	0	Center_08	723	0	2020-03-24	1	22	1	2020-03-19	M	1	70	10	10	10	0	0	0	1	1	blank	4.Critical/Fatal	4	1	1	1	blank	blank	censored	1	1	0	1	0	1	0	0	0	0	0	0	0	0	blank	2020-04-15	0	0	1	1
1986	0	Center_08	724	1	2020-03-24	1	26	1	2020-03-21	M	1	77	7	7	8	1	0	0	1	1	blank	4.Critical/Fatal	4	1	1	1	blank	blank	censored	1	1	1	1	0	0	0	0	0	0	0	0	0	0	blank	2020-04-20	0	0	1	1
1987	0	Center_08	724	0	2020-03-24	1	26	1	2020-03-21	M	1	77	7	7	8	1	0	0	1	1	blank	4.Critical/Fatal	4	1	1	1	blank	blank	censored	1	1	1	1	0	0	0	0	0	0	0	0	0	0	blank	not yet	0	0	1	1
1988	0	Center_08	725	1	2020-03-25	0	14	1	2020-03-23	M	1	69	9	9	10	0	0	0	1	1	blank	4.Critical/Fatal	4	1	1	1	blank	blank	censored	1	0	0	0	1	0	0	0	0	0	0	0	0	0	blank	2020-04-08	0	0	1	1
1989	0	Center_08	726	1	2020-03-25	0	15	1	2020-03-23	M	1	54	6	6	6	1	0	0	1	1	blank	4.Critical/Fatal	4	1	1	1	blank	blank	censored	1	0	1	1	0	0	0	0	0	0	0	0	0	0	blank	2020-04-09	0	0	1	1
1990	ET	Center_08	727	1	2020-03-21	4	12	1	2020-03-21	F	0	76	5	5	6	1	0	1	0	0	blank	3.Severe	3	0	0	1	blank	blank	censored	1	0	0	0	0	0	0	0	0	0	1	0	0	0	blank	2020-04-02	0	0	0	0
1991	0	Center_08	728	1	2020-03-22	0	0	1	2020-03-22	F	0	67	11	11	12	0	1	0	0	1	blank	1.Mild	1	0	0	0	blank	blank	0	0	0	0	0	0	0	0	0	0	0	0	0	0	0	blank		0	0	0	0
1992	0	Center_08	729	1	2020-03-25	0	17	1	2020-03-23	F	0	74	11	11	12	0	0	0	1	1	blank	4.Critical/Fatal	4	1	1	1	blank	blank	censored	1	0	1	0	0	1	0	0	0	1	0	0	1	0	blank	2020-04-11	0	0	1	1
1993	0	Center_08	729	0	2020-03-25	0	17	1	2020-03-23	F	0	74	11	11	12	0	0	0	1	1	blank	4.Critical/Fatal	4	1	1	1	blank	blank	censored	1	0	1	0	0	1	0	0	0	1	0	0	1	0	blank	2020-04-11	0	0	1	1
1994	0	Center_08	730	1	2020-03-21	0	78	1	2020-03-18	M	1	53	4	4	4	1	0	0	1	1	blank	4.Critical/Fatal	4	1	1	1	blank	blank	censored	1	0	1	0	0	0	0	0	1	0	0	0	0	0	blank	2020-06-07	0	0	1	1
1995	0	Center_08	730	0	2020-03-21	1	78	1	2020-03-18	M	1	53	5	5	6	1	0	0	1	1	blank	4.Critical/Fatal	4	1	1	1	blank	blank	censored	1	0	1	0	0	0	0	0	1	0	0	0	0	0	blank	2020-06-07	0	0	1	1
1996	0	Center_08	730	0	2020-03-21	2	78	1	2020-03-18	M	1	53	6	6	6	1	0	0	1	1	blank	4.Critical/Fatal	4	1	1	1	blank	blank	censored	1	0	1	0	0	0	0	0	1	0	0	0	0	0	blank	2020-06-07	0	0	1	1
1997	0	Center_08	730	0	2020-03-21	3	78	1	2020-03-18	M	1	53	7	7	8	1	0	0	1	1	blank	4.Critical/Fatal	4	1	1	1	blank	blank	censored	1	0	1	0	0	0	0	0	1	0	0	0	0	0	blank	2020-06-07	0	0	1	1
1998	0	Center_08	730	0	2020-03-21	4	78	1	2020-03-18	M	1	53	8	8	8	0	0	0	1	1	blank	4.Critical/Fatal	4	1	1	1	blank	blank	censored	1	0	1	0	0	0	0	0	1	0	0	0	0	0	blank	2020-06-07	0	0	1	1
1999	0	Center_08	731	1	2020-03-18	1	1	1	2020-03-17	M	1	56	4	4	4	1	0	1	0	0	blank	2.Moderate	2	0	0	0	blank	blank	censored	1	1	0	0	0	0	0	0	0	0	0	0	0	0	blank	2020-03-19	0	0	0	0
[truncated: 632 more rows]
[truncated: 207 more columns]

## Sheet: Fig2Ametadata
Filename	exclusion	length_of_hospitalisation	Critical_or_Fatal	Riskscore complete
1	0	0	1	1
2	0	2	1	0
3	0	2	1	2
4	0	3	1	4
5	0	4	1	4
6	0	15	1	0
7	0	0	0	1
8	0	1	0	0
9	0	2	0	1
10	0	3	0	1
11	0	4	0	1
12	0	6	0	1
13	0	0	1	3
14	0	1	1	2
15	0	1	1	7
16	0	2	1	9
17	0	3	1	6
18	0	4	1	8
19	0	4	1	7
20	0	5	1	4
21	0	6	1	6
22	0	7	1	8
23	0	8	1	4
24	0	9	1	6
25	0	10	1	4
26	0	11	1	3
27	0	12	1	2
28	0	13	1	1
29	0	0	1	3
30	0	1	1	8
31	0	1	1	8
32	0	2	1	2
33	0	3	1	5
34	0	4	1	9
35	0	5	1	12
36	0	6	1	12
37	0	7	1	10
38	0	8	1	20
39	0	9	1	17
40	0	10	1	14
41	0	10	1	15
42	0	11	1	12
43	0	12	1	6
44	0	13	1	5
45	0	14	1	5
46	0	0	0	2
47	0	1	0	1
48	0	0	0	0
49	0	2	0	3
50	0	3	0	0
51	0	5	0	3
52	0	0	0	0
53	0	2	0	3
54	0	3	0	3
55	0	4	0	0
56	0	5	0	0
57	0	6	0	0
58	0	1	0
59	0	0	0	1
