# Supplementary material for: A novel haemocytometric COVID-19 prognostic score developed and validated in an observational multicentre European hospital-based study
Source: eLife journal article supplement (doi:10.7554/elife.63195), 2020-11-26
Supplement: supp [file elife-63195-supp-v1.zip › elife_poa_e63195_Table_1_source_data_1.csv]

Table 1- Source data file 1. Source data for basic demographic characteristics of COVID-19 PCR confirmed patients enrolled for prognostic score development
Filename	exclusion	Pat_ID	Baseline	total length_of_hospitalisation	Sex	age	severity index	comorbidity_exists	Cardiovascular problems	Hypertension	Diabetes	Malignancy	Lung disorders	Kidney disease	CNS/cognitive disorders	Auto immune disease	OBESITY	Haematological Disorder/Malignancy	Pregnancy	other
1	0	1	1	16	M	58	4.Critical/Fatal	1	0	1	0	0	0	0	0	0	0	0	0	0
7	0	2	1	6	M	51	3.Severe	0	0	0	0	0	0	0	0	0	0	0	0	0
13	0	3	1	30	M	51	4.Critical/Fatal	1	0	0	0	0	0	0	0	1	0	0	0	1
29	0	4	1	21	F	74	4.Critical/Fatal	1	0	1	0	0	0	1	0	0	0	0	0	0
46	0	5	1	13	F	66	3.Severe	1	1	0	0	0	1	0	0	0	0	0	0	1
48	0	6	1	8	F	55	3.Severe	0	0	0	0	0	0	0	0	0	0	0	0	0
52	0	7	1	9	F	58	3.Severe	0	0	0	0	0	0	0	0	0	0	0	0	0
58	0	8	1	1	F	39	2.Moderate	0	0	0	0	0	0	0	0	0	0	0	0	0
59	0	9	1	7	M	74	3.Severe	1	0	1	0	0	0	1	0	0	0	0	0	0
65	0	10	1	58	M	73	4.Critical/Fatal	1	0	0	0	0	0	0	0	0	0	1	0	1
69	0	11	1	4	F	64	2.Moderate	1	0	1	0	0	0	1	0	0	0	0	0	0
72	0	12	1	9	M	62	4.Critical/Fatal	1	0	0	0	1	1	0	0	0	0	0	0	0
74	0	13	1	27	M	42	4.Critical/Fatal	1	0	0	0	0	0	0	0	0	0	0	0	1
84	0	14	1	1	M	34	2.Moderate	1	0	0	0	0	0	1	0	0	0	0	0	0
85	0	15	1	40	M	63	4.Critical/Fatal	1	0	0	1	0	0	1	0	0	1	0	0	0
93	0	16	1	58	M	80	4.Critical/Fatal	1	1	0	0	1	0	0	0	0	0	0	0	0
102	0	17	1	5	F	68	2.Moderate	1	0	0	0	0	0	0	0	0	1	0	0	1
105	0	18	1	31	M	78	4.Critical/Fatal	0	0	0	0	0	0	0	0	0	0	0	0	0
110	0	19	1	55	M	88	4.Critical/Fatal	1	1	1	0	0	0	1	0	0	0	0	0	0
113	0	20	1	45	M	58	3.Severe	1	0	1	1	0	1	0	0	0	0	0	0	0
116	0	21	1	4	M	67	4.Critical/Fatal	1	0	1	0	0	0	1	0	0	0	0	0	0
117	0	22	1	0	F	63	1.Mild	0	0	0	0	0	0	0	0	0	0	0	0	0
118	0	23	1	0	M	69	1.Mild	0	0	0	0	0	0	0	0	0	0	0	0	0
119	0	24	1	1	F	62	2.Moderate	1	0	1	0	0	0	0	0	1	0	0	0	0
120	0	25	1	5	M	81	4.Critical/Fatal	1	0	1	0	1	0	1	0	0	0	0	0	0
121	0	26	1	14	M	60	3.Severe	1	0	1	0	0	0	0	0	0	0	0	0	0
122	0	27	1	16	F	70	3.Severe	1	0	0	1	0	0	0	1	0	0	0	0	0
123	0	28	1	8	M	58	3.Severe	0	0	0	0	0	0	0	0	0	0	0	0	0
124	0	29	1	9	F	49	3.Severe	0	0	0	0	0	0	0	0	0	0	0	0	0
125	0	30	1	5	M	67	4.Critical/Fatal	1	0	0	0	1	1	0	0	0	0	0	0	0
127	0	31	1	7	M	62	3.Severe	1	0	0	1	0	0	0	0	0	0	0	0	1
128	0	32	1	7	M	80	4.Critical/Fatal	0	0	0	0	0	0	0	0	0	0	0	0	0
129	0	33	1	13	M	78	4.Critical/Fatal	1	0	0	1	0	1	0	0	0	0	0	0	0
130	0	34	1	12	M	71	4.Critical/Fatal	1	1	0	0	0	1	0	0	0	0	0	0	0
131	0	35	1	0	F	47	1.Mild	0	0	0	0	0	0	0	0	0	0	0	0	0
132	0	36	1		M	52	4.Critical/Fatal	0	0	0	0	0	0	0	0	0	0	0	0	0
133	0	37	1	9	M	73	3.Severe	1	0	1	0	0	0	0	0	0	0	0	0	0
134	0	38	1	2	F	74	4.Critical/Fatal	1	0	1	0	0	0	0	0	0	0	0	0	0
135	0	39	1	4	M	58	2.Moderate	0	0	0	0	0	0	0	0	0	0	0	0	0
136	0	40	1	0	M	74	1.Mild	1	1	0	1	0	0	0	0	1	0	0	0	1
137	0	41	1	0	M	72	1.Mild	0	0	0	0	0	0	0	0	0	0	0	0	0
138	0	42	1	0	M	35	1.Mild	0	0	0	0	0	0	0	0	0	0	0	0	0
139	0	43	1	7	M	75	3.Severe	1	1	1	1	0	0	0	0	0	0	0	0	0
140	0	44	1	3	M	91	2.Moderate	1	1	0	1	0	0	0	0	0	0	0	0	0
141	0	45	1	27	M	68	4.Critical/Fatal	0	0	0	0	0	0	0	0	0	0	0	0	0
168	0	46	1	7	F	75	3.Severe	1	0	0	0	0	0	0	0	1	0	0	0	0
169	0	47	1	8	M	73	3.Severe	1	1	0	0	0	0	0	0	0	0	0	0	0
170	0	48	1	3	F	74	4.Critical/Fatal	1	1	1	1	1	0	0	0	0	0	0	0	0
171	0	49	1	3	M	82	4.Critical/Fatal	0	0	0	0	0	0	0	0	0	0	0	0	0
172	0	50	1	25	M	75	3.Severe	1	0	0	0	0	0	0	1	0	0	0	0	0
173	0	51	1		M	63	3.Severe	0	0	0	0	0	0	0	0	0	0	0	0	0
174	0	52	1	10	F	74	4.Critical/Fatal	1	0	0	0	0	0	1	0	0	0	0	0	0
175	0	53	1		M	64	4.Critical/Fatal	0	0	0	0	0	0	0	0	0	0	0	0	0
176	0	54	1	14	F	83	4.Critical/Fatal	1	1	1	0	0	0	0	0	0	0	0	0	1
180	0	55	1	4	M	70	2.Moderate	1	0	1	1	0	1	0	0	0	0	0	0	1
181	0	56	1		M	67	4.Critical/Fatal	1	0	1	0	0	0	0	0	0	0	0	0	0
182	0	57	1	46	F	71	3.Severe	1	0	0	0	1	0	0	0	0	1	0	0	1
183	0	58	1	22	M	81	3.Severe	1	0	1	1	0	0	0	0	0	0	0	0	0
184	0	59	1	0	F	66	1.Mild	1	0	1	0	0	1	0	0	0	0	0	0	1
185	0	60	1	18	F	82	3.Severe	1	1	0	0	0	0	1	0	0	0	0	0	0
186	0	61	1	0	M	87	1.Mild	0	0	0	0	0	0	0	0	0	0	0	0	0
187	0	62	1	3	M	83	4.Critical/Fatal	1	0	1	1	0	0	0	1	0	0	0	0	0
188	0	63	1	7	M	68	3.Severe	1	1	0	0	0	0	0	0	0	0	0	0	1
189	0	64	1	6	F	25	3.Severe	1	0	0	0	0	0	0	0	0	1	0	0	1
190	0	65	1	7	M	65	3.Severe	0	0	0	0	0	0	0	0	0	0	0	0	0
191	0	66	1	9	M	73	4.Critical/Fatal	1	0	1	1	0	0	0	0	0	0	0	0	0
192	0	67	1	12	M	58	3.Severe	0	0	0	0	0	0	0	0	0	0	0	0	0
193	0	68	1	7	M	73	3.Severe	1	0	0	0	0	1	1	0	0	0	0	0	1
194	0	69	1	0	F	69	1.Mild	0	0	0	0	0	0	0	0	0	0	0	0	0
195	0	70	1	6	M	57	3.Severe	1	0	0	0	0	0	0	0	0	0	0	0	1
196	0	71	1	6	M	77	3.Severe	1	1	1	0	0	0	0	0	0	0	0	0	0
197	0	72	1	0	M	60	1.Mild	1	1	0	0	0	0	0	0	1	0	0	0	0
198	0	73	1	5	M	36	2.Moderate	0	0	0	0	0	0	0	0	0	0	0	0	0
199	0	74	1		F	72	3.Severe	1	0	1	0	0	0	0	0	1	0	0	0	0
200	0	75	1	13	M	58	3.Severe	1	0	0	0	0	0	0	0	0	0	0	0	1
201	0	76	1	0	M	42	1.Mild	0	0	0	0	0	0	0	0	0	0	0	0	0
202	0	77	1	15	F	90	3.Severe	1	0	0	0	0	0	0	1	0	0	0	0	0
203	0	78	1	41	F	77	4.Critical/Fatal	0	0	0	0	0	0	0	0	0	0	0	0	0
204	0	79	1	14	M	52	3.Severe	1	1	0	0	0	0	1	0	0	1	1	0	1
215	0	80	1	2	M	59	2.Moderate	0	0	0	0	0	0	0	0	0	0	0	0	0
216	0	81	1	5	M	73	4.Critical/Fatal	1	1	0	0	0	0	0	0	0	0	0	0	0
217	0	82	1	7	M	57	3.Severe	1	0	1	0	0	0	0	0	0	0	0	0	0
218	0	83	1	0	M	37	1.Mild	0	0	0	0	0	0	0	0	0	0	0	0	0
220	0	85	1	10	M	32	4.Critical/Fatal	0	0	0	0	0	0	0	0	0	0	0	0	0
221	0	86	1	2	F	86	4.Critical/Fatal	1	0	1	0	1	0	0	0	0	0	0	0	0
222	0	87	1	0	M	55	1.Mild	0	0	0	0	0	0	0	0	0	0	0	0	0
223	0	88	1	29	M	62	3.Severe	0	0	0	0	0	0	0	0	0	0	0	0	0
225	0	90	1	0	F	92	1.Mild	0	0	0	0	0	0	0	0	0	0	0	0	0
226	0	91	1	1	F	54	2.Moderate	0	0	0	0	0	0	0	0	0	0	0	0	0
227	0	92	1	21	M	68	3.Severe	0	0	0	0	0	0	0	0	0	0	0	0	0
228	0	93	1	2	M	71	4.Critical/Fatal	1	1	1	0	0	0	0	0	0	0	0	0	0
231	0	94	1	6	F	66	3.Severe	1	0	1	1	0	0	0	0	0	0	0	0	0
232	0	95	1	13	M	82	3.Severe	0	0	0	0	0	0	0	0	0	0	0	0	0
233	0	96	1	0	M	89	4.Critical/Fatal	1	1	1	0	0	0	0	0	0	0	0	0	0
234	0	97	1	7	M	62	3.Severe	1	0	1	0	0	0	0	0	0	0	0	0	0
235	0	98	1	14	F	78	3.Severe	1	1	1	1	0	0	0	0	0	1	0	0	0
240	0	99	1	5	M	83	4.Critical/Fatal	1	1	0	0	0	1	0	0	0	0	0	0	0
246	0	100	1	3	M	80	4.Critical/Fatal	1	1	1	1	0	0	0	0	0	1	0	0	0
247	0	101	1	2	M	87	4.Critical/Fatal	0	0	0	0	0	0	0	0	0	0	0	0	0
248	0	102	1	11	M	58	3.Severe	0	0	0	0	0	0	0	0	0	0	0	0	0
249	0	103	1	3	M	67	4.Critical/Fatal	1	0	0	0	0	1	0	0	0	0	0	0	0
251	0	104	1	Transferred to another facility	M	72	4.Critical/Fatal	1	1	0	0	0	0	0	0	0	0	0	0	0
252	0	105	1	14	F	39	3.Severe	0	0	0	0	0	0	0	0	0	0	0	0	0
253	0	106	1	6	M	85	4.Critical/Fatal	1	1	0	0	0	0	0	0	0	0	0	0	0
254	0	107	1	0	F	40	1.Mild	0	0	0	0	0	0	0	0	0	0	0	0	0
255	0	108	1	5	M	69	2.Moderate	1	0	0	0	0	0	0	0	1	0	0	0	0
256	0	109	1	6	M	71	4.Critical/Fatal	1	0	1	0	0	1	0	0	0	0	0	0	0
257	0	110	1	21	M	57	3.Severe	1	0	1	0	0	0	0	0	0	0	0	0	0
275	0	111	1	20	F	75	3.Severe	1	1	0	0	0	1	0	0	0	0	0	0	0
276	0	112	1		M	52	3.Severe	1	0	1	0	0	0	0	0	0	0	0	0	0
277	0	113	1	24	M	56	3.Severe	1	0	1	0	0	0	0	0	0	1	0	0	0
278	0	114	1	6	M	73	4.Critical/Fatal	1	0	1	1	0	0	0	0	1	0	0	0	0
279	0	115	1	5	M	57	4.Critical/Fatal	1	1	0	0	0	0	0	0	0	0	0	0	0
280	0	116	1	1	M	84	4.Critical/Fatal	1	1	0	0	0	0	0	0	0	0	0	0	0
281	0	117	1	0	M	57	1.Mild	0	0	0	0	0	0	0	0	0	0	0	0	0
282	0	118	1	2	M	89	4.Critical/Fatal	1	0	1	0	0	1	0	0	0	0	0	0	0
283	0	119	1	8	M	86	4.Critical/Fatal	1	0	0	0	1	0	0	0	0	0	0	0	0
284	0	120	1		F	68	4.Critical/Fatal	1	0	0	0	0	0	0	0	0	0	0	0	1
285	0	121	1	8	M	69	4.Critical/Fatal	1	0	1	1	0	0	0	1	0	0	0	0	0
286	0	122	1	10	M	49	3.Severe	0	0	0	0	0	0	0	0	0	0	0	0	0
290	0	123	1	2	M	82	4.Critical/Fatal	0	0	0	0	0	0	0	0	0	0	0	0	0
291	0	124	1	8	M	68	3.Severe	1	0	1	0	1	1	0	0	0	0	0	0	0
292	0	125	1	8	M	63	3.Severe	1	0	0	0	0	0	0	0	0	0	0	0	1
293	0	126	1	3	M	81	4.Critical/Fatal	1	1	1	1	0	0	0	0	1	1	0	0	0
295	0	127	1	5	M	52	2.Moderate	0	0	0	0	0	0	0	0	0	0	0	0	0
297	0	128	1	5	M	78	4.Critical/Fatal	1	1	1	1	0	0	0	1	0	0	0	0	0
298	0	129	1	0	M	84	1.Mild	0	0	0	0	0	0	0	0	0	0	0	0	0
299	0	130	1	7	M	73	4.Critical/Fatal	1	0	1	1	0	0	0	0	0	0	0	0	0
300	0	131	1	6	M	90	4.Critical/Fatal	1	1	0	0	0	1	0	0	0	0	1	0	1
301	0	132	1	3	M	84	4.Critical/Fatal	1	0	0	0	0	1	0	0	0	0	0	0	0
302	0	133	1	9	M	62	4.Critical/Fatal	1	1	1	0	0	0	1	0	0	0	0	0	0
303	0	134	1	3	M	80	4.Critical/Fatal	1	1	0	0	0	0	0	0	0	0	0	0	0
306	0	135	1	9	M	66	3.Severe	1	0	1	0	0	0	0	0	0	0	0	0	1
307	0	136	1	14	M	61	3.Severe	0	0	0	0	0	0	0	0	0	0	0	0	0
317	0	137	1	5	M	82	4.Critical/Fatal	1	0	1	0	0	0	0	0	0	0	0	0	0
321	0	138	1	6	M	67	3.Severe	1	1	0	0	0	0	0	0	0	0	0	0	0
322	0	139	1		F	69	3.Severe	0	0	0	0	0	0	0	0	0	0	0	0	0
323	0	140	1	8	M	47	3.Severe	0	0	0	0	0	0	0	0	0	0	0	0	0
326	0	141	1	0	F	47	1.Mild	0	0	0	0	0	0	0	0	0	0	0	0	0
327	0	142	1		M	71	4.Critical/Fatal	0	0	0	0	0	0	0	0	0	0	0	0	0
328	0	143	1	2	M	74	4.Critical/Fatal	1	0	0	0	0	1	0	0	0	0	0	0	0
329	0	144	1		M	36	3.Severe	1	0	1	0	0	0	0	0	0	0	0	0	0
330	0	145	1	2	M	49	2.Moderate	1	0	0	0	0	0	0	0	0	0	0	0	1
331	0	146	1	9	M	54	3.Severe	0	0	0	0	0	0	0	0	0	0	0	0	0
332	0	147	1	21	F	89	4.Critical/Fatal	1	0	1	0	0	0	0	0	0	0	0	0	0
333	0	148	1	0	M	77	4.Critical/Fatal	1	0	1	0	0	0	0	0	0	1	1	0	0
334	0	149	1	22	M	76	3.Severe	0	0	0	0	0	0	0	0	0	0	0	0	0
335	0	150	1		M	56	4.Critical/Fatal	0	0	0	0	0	0	0	0	0	0	0	0	0
336	0	151	1	15	M	64	4.Critical/Fatal	1	1	1	0	0	0	0	0	0	0	0	0	0
337	0	152	1	0	M	66	1.Mild	0	0	0	0	0	0	0	0	0	0	0	0	0
338	0	153	1	0	M	96	1.Mild	1	0	0	0	0	0	0	1	0	0	0	0	0
339	0	154	1		M	60	3.Severe	1	0	1	0	0	0	0	0	0	0	0	0	0
340	0	155	1	14	F	84	3.Severe	1	0	1	0	0	0	0	0	1	0	0	0	1
341	0	156	1	6	F	72	3.Severe	0	0	0	0	0	0	0	0	0	0	0	0	0
342	0	157	1	5	M	81	4.Critical/Fatal	1	1	1	1	1	1	0	0	0	0	0	0	0
343	0	158	1	0	M	54	1.Mild	0	0	0	0	0	0	0	0	0	0	0	0	0
344	0	159	1	6	M	71	3.Severe	0	0	0	0	0	0	0	0	0	0	0	0	0
345	0	160	1	1	M	37	2.Moderate	0	0	0	0	0	0	0	0	0	0	0	0	0
346	0	161	1	19	F	81	4.Critical/Fatal	1	0	1	0	0	0	0	0	0	0	0	0	0
347	0	162	1	4	F	90	4.Critical/Fatal	0	0	0	0	0	0	0	0	0	0	0	0	0
348	0	163	1	6	F	50	3.Severe	1	1	0	0	0	0	0	0	0	0	0	0	0
349	0	164	1	28	M	68	4.Critical/Fatal	0	0	0	0	0	0	0	0	0	0	0	0	0
350	0	165	1		F	56	4.Critical/Fatal	0	0	0	0	0	0	0	0	0	0	0	0	0
351	0	166	1	7	M	74	4.Critical/Fatal	0	0	0	0	0	0	0	0	0	0	0	0	0
352	0	167	1	0	M	55	1.Mild	1	1	0	0	0	0	0	0	0	0	0	0	0
353	0	168	1	0	M	59	1.Mild	0	0	0	0	0	0	0	0	0	0	0	0	0
355	0	170	1	1	M	81	2.Moderate	1	0	1	1	0	0	0	0	0	1	0	0	0
356	0	171	1	10	M	73	3.Severe	1	0	0	1	0	1	0	0	0	0	0	0	0
357	0	172	1	1	M	87	2.Moderate	1	1	1	0	0	0	1	0	0	0	1	0	0
358	0	173	1	5	M	57	4.Critical/Fatal	0	0	0	0	0	0	0	0	0	0	0	0	0
359	0	174	1	1	M	65	2.Moderate	1	0	1	1	0	0	0	0	0	0	0	0	0
360	0	175	1	5	F	91	4.Critical/Fatal	1	0	0	1	0	0	0	0	0	0	0	0	0
361	0	176	1	1	F	67	2.Moderate	1	1	0	0	0	1	0	0	0	0	0	0	0
362	0	177	1	18	F	64	3.Severe	1	0	0	1	0	0	0	0	0	0	0	0	1
363	0	178	1	3	M	67	4.Critical/Fatal	1	0	0	1	0	0	1	0	0	0	0	0	0
364	0	179	1	16	M	75	3.Severe	1	1	1	0	0	0	0	0	0	0	0	0	0
380	0	180	1	24	M	67	4.Critical/Fatal	1	0	1	0	0	0	0	0	0	0	0	0	0
381	0	181	1	12	M	36	3.Severe	1	0	0	0	0	0	0	0	0	1	0	0	1
382	0	182	1	16	M	67	3.Severe	1	1	0	1	0	0	1	0	0	0	0	0	0
383	0	183	1	15	M	53	3.Severe	1	0	1	0	0	0	0	0	0	0	0	0	0
384	0	184	1	10	F	74	3.Severe	1	0	0	1	0	0	0	0	0	0	0	0	0
385	0	185	1	17	M	70	3.Severe	1	0	1	1	0	0	0	1	0	0	0	0	0
386	0	186	1	4	F	76	4.Critical/Fatal	1	1	0	0	0	0	0	0	0	0	0	0	0
387	0	187	1	14	M	78	3.Severe	1	0	1	0	0	0	0	0	0	0	0	0	0
388	0	188	1	10	M	70	4.Critical/Fatal	1	1	1	1	0	0	0	0	0	1	0	0	0
389	0	189	1	6	M	93	4.Critical/Fatal	1	1	0	0	0	0	0	0	0	0	0	0	0
392	0	190	1	23	F	50	3.Severe	1	0	0	0	0	0	0	1	0	0	0	0	0
393	0	191	1	11	M	85	3.Severe	1	0	0	1	0	0	0	0	0	0	0	0	0
394	0	192	1	12	F	74	3.Severe	1	1	0	0	0	1	0	0	0	0	0	0	0
395	0	193	1	1	M	53	2.Moderate	0	0	0	0	0	0	0	0	0	0	0	0	0
396	0	194	1	4	M	84	4.Critical/Fatal	1	1	0	1	0	0	0	0	0	0	0	0	1
397	0	195	1		M	58	3.Severe	0	0	0	0	0	0	0	0	0	0	0	0	0
398	0	196	1	3	M	91	4.Critical/Fatal	1	0	0	0	0	0	1	0	0	0	0	0	0
399	0	197	1		M	54	3.Severe	1	0	0	0	0	0	0	1	0	0	0	0	0
400	0	198	1	17	M	58	3.Severe	1	0	0	0	0	0	0	0	0	0	0	0	1
401	0	199	1		M	77	4.Critical/Fatal	1	1	1	0	0	0	0	0	0	0	0	0	0
402	0	200	1	6	M	72	4.Critical/Fatal	0	0	0	0	0	0	0	0	0	0	0	0	0
403	0	201	1		M	61	4.Critical/Fatal	1	1	1	0	0	0	0	0	0	0	0	0	0
404	0	202	1	7	M	76	4.Critical/Fatal	1	1	0	0	0	0	0	0	0	0	0	0	0
405	0	203	1		M	43	4.Critical/Fatal	0	0	0	0	0	0	0	0	0	0	0	0	0
406	0	204	1	3	F	69	2.Moderate	1	0	1	0	0	0	0	0	0	0	0	0	0
407	0	205	1		M	57	3.Severe	1	0	1	1	0	0	0	0	0	0	0	0	0
408	0	206	1	2	M	48	2.Moderate	1	0	0	0	0	0	0	1	0	0	0	0	0
409	0	207	1	16	M	62	3.Severe	1	1	0	0	0	0	0	0	0	0	0	0	0
410	0	208	1	12	F	95	4.Critical/Fatal	1	1	0	0	0	0	0	0	0	0	0	0	0
411	0	209	1	19	M	45	3.Severe	0	0	0	0	0	0	0	0	0	0	0	0	0
412	0	210	1	15	M	66	4.Critical/Fatal	1	1	0	0	0	0	1	0	0	0	0	0	0
413	0	211	1	36	M	77	3.Severe	1	1	1	0	0	1	0	0	1	0	0	0	0
414	0	212	1	10	M	67	4.Critical/Fatal	1	0	0	0	0	0	0	0	0	0	0	0	0
415	0	213	1		M	72	4.Critical/Fatal	1	0	0	1	0	0	0	0	0	0	0	0	1
416	0	214	1	7	M	81	4.Critical/Fatal	1	1	0	0	0	1	0	0	0	1	1	0	0
417	0	215	1	17	M	76	4.Critical/Fatal	1	0	0	0	0	0	0	0	1	0	0	0	0
418	0	216	1	9	F	64	3.Severe	0	0	0	0	0	0	0	0	0	0	0	0	0
425	0	217	1	9	M	91	4.Critical/Fatal	1	0	1	1	0	0	0	0	0	0	0	0	0
429	0	218	1	14	M	83	3.Severe	0	0	0	0	0	0	0	0	0	0	0	0	0
430	0	219	1	5	M	64	2.Moderate	1	0	0	1	0	0	0	0	0	1	1	0	1
431	0	220	1	14	M	68	4.Critical/Fatal	1	1	1	1	0	0	0	0	0	1	0	0	0
432	0	221	1	9	M	76	3.Severe	1	0	0	0	0	0	0	0	0	0	0	0	1
433	0	222	1		M	83	3.Severe	1	1	0	0	0	0	0	0	0	0	0	0	0
434	0	223	1	7	M	86	4.Critical/Fatal	0	0	0	0	0	0	0	0	0	0	0	0	0
435	0	224	1	6	M	77	4.Critical/Fatal	1	0	0	0	0	0	0	0	1	0	0	0	0
436	0	225	1		M	58	4.Critical/Fatal	1	0	0	0	0	0	0	0	0	0	0	0	1
437	0	226	1	0	F	67	1.Mild	0	0	0	0	0	0	0	0	0	0	0	0	0
438	0	227	1	9	F	74	3.Severe	1	0	1	0	0	0	0	0	0	1	0	0	0
439	0	228	1	4	F	35	2.Moderate	1	0	0	0	0	0	0	0	0	0	0	1	0
440	0	229	1	0	M	48	1.Mild	0	0	0	0	0	0	0	0	0	0	0	0	0
441	0	230	1	0	M	44	1.Mild	0	0	0	0	0	0	0	0	0	0	0	0	0
442	0	231	1	4	M	83	4.Critical/Fatal	1	0	0	0	0	0	0	1	0	0	0	0	0
443	0	232	1	10	M	66	3.Severe	1	1	0	0	0	0	0	0	0	0	0	0	0
444	0	233	1		M	53	3.Severe	0	0	0	0	0	0	0	0	0	0	0	0	0
445	0	234	1	8	M	76	3.Severe	1	0	1	0	0	0	0	0	0	0	0	0	0
446	0	235	1	9	F	76	3.Severe	1	0	1	0	0	0	0	0	0	0	0	0	0
447	0	236	1	0	M	57	1.Mild	0	0	0	0	0	0	0	0	0	0	0	0	0
448	0	237	1	5	F	79	4.Critical/Fatal	1	1	0	0	0	1	0	0	0	0	0	0	0
455	0	238	1	25	M	45	4.Critical/Fatal	0	0	0	0	0	0	0	0	0	0	0	0	0
461	0	239	1	3	F	53	2.Moderate	0	0	0	0	0	0	0	0	0	0	0	0	0
462	0	240	1	Transferred to another facility	M	62	3.Severe	0	0	0	0	0	0	0	0	0	0	0	0	0
465	0	241	1	Transferred to another facility	F	68	4.Critical/Fatal	1	0	0	0	1	0	0	0	0	0	1	0	0
475	0	242	1	Transferred to another facility	M	75	4.Critical/Fatal	1	0	0	0	1	0	0	0	0	0	0	0	0
481	0	243	1	Transferred to another facility	M	61	4.Critical/Fatal	0	0	0	0	0	0	0	0	0	0	0	0	0
486	0	244	1	7	M	60	3.Severe	0	0	0	0	0	0	0	0	0	0	0	0	0
488	0	245	1	Transferred to another facility	M	58	4.Critical/Fatal	0	0	0	0	0	0	0	0	0	0	0	0	0
489	0	246	1	4	M	67	2.Moderate	0	0	0	0	0	0	0	0	0	0	0	0	0
491	0	247	1	7	M	76	3.Severe	0	0	0	0	0	0	0	0	0	0	0	0	0
495	0	248	1	10	M	53	3.Severe	0	0	0	0	0	0	0	0	0	0	0	0	0
499	0	249	1	31	M	56	4.Critical/Fatal	1	0	0	1	0	0	0	0	0	0	0	0	0
508	0	250	1	Transferred to another facility	F	71	3.Severe	1	0	0	0	0	1	0	0	0	0	0	0	0
511	0	251	1	5	M	66	2.Moderate	1	0	1	0	0	0	0	0	0	0	0	0	1
514	0	252	1	14	M	48	4.Critical/Fatal	0	0	0	0	0	0	0	0	0	0	0	0	0
520	0	253	1	20	M	71	4.Critical/Fatal	0	0	0	0	0	0	0	0	0	0	0	0	0
527	0	254	1	6	F	73	4.Critical/Fatal	1	0	0	0	1	1	0	0	0	0	0	0	0
528	0	255	1	16	F	67	3.Severe	0	0	0	0	0	0	0	0	0	0	0	0	0
533	0	256	1	Transferred to another facility	M	68	3.Severe	1	0	0	1	1	0	0	0	0	0	0	0	1
535	0	257	1	6	F	78	4.Critical/Fatal	1	1	0	1	0	0	0	0	0	0	0	0	0
539	0	258	1	3	M	52	2.Moderate	0	0	0	0	0	0	0	0	0	0	0	0	0
541	0	259	1	15	M	74	3.Severe	1	0	1	1	1	0	0	0	0	0	0	0	0
543	0	260	1	9	F	79	4.Critical/Fatal	1	0	0	1	0	0	1	0	0	0	0	0	0
548	0	261	1	27	M	43	4.Critical/Fatal	0	0	0	0	0	0	0	0	0	0	0	0	0
555	0	262	1	10	M	74	3.Severe	0	0	0	0	0	0	0	0	0	0	0	0	0
560	0	263	1	12	F	77	3.Severe	0	0	0	0	0	0	0	0	0	0	0	0	0
563	0	264	1	Transferred to another facility	F	69	3.Severe	1	0	0	0	0	0	0	0	0	0	0	0	0
567	0	265	1	Transferred to another facility	M	55	4.Critical/Fatal	0	0	0	0	0	0	0	0	0	0	0	0	0
570	0	266	1	Transferred to another facility	M	57	4.Critical/Fatal	1	0	0	0	0	1	0	0	0	0	0	0	0
575	0	267	1	2	M	66	2.Moderate	1	0	0	1	0	0	0	0	0	0	0	0	0
577	0	268	1	Transferred to another facility	F	54	4.Critical/Fatal	0	0	0	0	0	0	0	0	0	0	0	0	0
581	0	269	1	7	M	51	3.Severe	1	0	0	0	0	0	0	0	0	0	0	0	1
582	0	270	1	6	M	79	4.Critical/Fatal	1	0	0	0	1	0	1	0	0	0	0	0	0
585	0	271	1	9	M	75	4.Critical/Fatal	0	0	0	0	0	0	0	0	0	0	0	0	0
589	0	272	1	8	M	70	3.Severe	1	0	1	0	0	1	0	0	0	0	0	0	0
592	0	273	1	4	M	83	2.Moderate	1	1	0	0	0	1	1	0	0	0	0	0	0
593	0	274	1	Transferred to another facility	M	54	3.Severe	0	0	0	0	0	0	0	0	0	0	0	0	0
596	0	275	1	14	M	86	4.Critical/Fatal	1	0	0	0	0	1	0	0	0	0	0	0	0
602	0	276	1	19	F	53	3.Severe	0	0	0	0	0	0	0	0	0	0	0	0	0
605	0	277	1	8	F	62	3.Severe	0	0	0	0	0	0	0	0	0	0	0	0	0
609	0	278	1	5	F	69	2.Moderate	1	0	0	0	1	1	0	0	0	0	0	0	0
612	0	279	1	16	M	77	3.Severe	1	0	0	0	0	0	1	0	0	0	0	0	1
616	0	280	1	3	M	72	2.Moderate	0	0	0	0	0	0	0	0	0	0	0	0	0
617	0	281	1	Transferred to another facility	F	77	4.Critical/Fatal	0	0	0	0	0	0	0	0	0	0	0	0	0
618	0	282	1		M	87	3.Severe	0	0	0	0	0	0	0	0	0	0	0	0	0
619	0	283	1	Transferred to another facility	M	66	4.Critical/Fatal	1	0	0	0	1	0	0	0	0	0	0	0	0
620	0	284	1	Transferred to another facility	F	82	3.Severe	1	0	0	0	0	1	0	0	0	0	0	0	0
624	0	285	1	5	M	78	2.Moderate	1	1	0	1	0	0	0	0	0	0	0	0	0
627	0	286	1	5	F	69	2.Moderate	1	0	0	1	0	0	0	0	0	0	0	0	0
631	0	287	1	Transferred to another facility	M	77	3.Severe	1	0	0	1	1	0	0	0	0	0	0	0	0
633	0	288	1	31	M	66	4.Critical/Fatal	1	0	0	1	1	0	1	0	0	0	0	0	0
644	0	289	1	3	M	75	2.Moderate	1	0	1	0	0	0	0	0	0	0	0	0	0
645	0	290	1	Transferred to another facility	F	84	3.Severe	1	0	1	0	0	1	0	0	0	0	0	0	0
648	0	291	1	7	M	87	3.Severe	1	0	1	0	0	1	0	0	0	0	0	0	0
651	0	292	1	Transferred to another facility	M	59	4.Critical/Fatal	0	0	0	0	0	0	0	0	0	0	0	0	0
654	0	293	1	27	M	69	3.Severe	1	0	0	1	0	0	0	0	0	0	0	0	0
656	0	294	1	9	F	69	3.Severe	1	0	0	1	1	0	0	0	0	0	0	0	0
659	0	295	1	27	F	82	4.Critical/Fatal	1	0	0	0	1	0	0	0	0	0	0	0	0
660	0	296	1	8	M	74	3.Severe	1	0	0	0	0	1	0	0	0	0	0	0	0
662	0	297	1	5	F	55	2.Moderate	0	0	0	0	0	0	0	0	0	0	0	0	0
664	0	298	1	7	M	30	3.Severe	0	0	0	0	0	0	0	0	0	0	0	0	0
669	0	299	1	10	M	58	3.Severe	1	0	0	0	1	0	1	0	0	0	0	0	0
672	0	300	1	10	M	55	3.Severe	1	0	0	1	0	0	0	0	1	0	0	0	0
676	0	301	1	16	M	86	3.Severe	0	0	0	0	0	0	0	0	0	0	0	0	0
679	0	302	1	Transferred to another facility	F	93	3.Severe	0	0	0	0	0	0	0	0	0	0	0	0	0
682	0	303	1	2	F	74	2.Moderate	1	1	0	0	1	1	0	0	0	0	0	0	0
683	0	304	1	Transferred to another facility	F	73	3.Severe	0	0	0	0	0	0	0	0	0	0	0	0	0
684	0	305	1	4	M	73	2.Moderate	1	0	0	0	1	0	0	0	0	0	0	0	0
686	0	306	1	Transferred to another facility	M	57	3.Severe	0	0	0	0	0	0	0	0	0	0	0	0	0
687	0	307	1	9	M	84	4.Critical/Fatal	0	0	0	0	0	0	0	0	0	0	0	0	0
690	0	308	1	5	M	81	4.Critical/Fatal	1	0	1	0	0	0	0	0	0	0	0	0	0
692	0	309	1	7	M	87	4.Critical/Fatal	1	0	1	0	1	0	1	0	0	0	0	0	0
697	0	310	1	7	M	57	3.Severe	0	0	0	0	0	0	0	0	0	0	0	0	0
700	0	311	1	Transferred to another facility	F	86	3.Severe	1	1	0	0	0	0	0	0	0	0	0	0	0
703	0	312	1	3	F	76	2.Moderate	1	0	1	1	1	0	0	0	0	0	0	0	0
705	0	313	1	9	F	41	3.Severe	1	0	0	0	0	1	0	0	0	0	0	0	0
708	0	314	1	Transferred to another facility	F	52	3.Severe	0	0	0	0	0	0	0	0	0	0	0	0	0
711	0	315	1	Transferred to another facility	M	65	4.Critical/Fatal	1	0	1	1	0	0	0	0	0	0	0	0	0
712	0	316	1	2	F	70	2.Moderate	1	0	0	0	0	1	0	0	0	0	0	0	0
715	0	318	1	15	M	72	3.Severe
720	0	319	1	Transferred to another facility	M	65	4.Critical/Fatal
730	0	320	1	20	M	63	4.Critical/Fatal
731	0	321	1	3	F	48	2.Moderate
733	0	322	1	6	M	76	3.Severe
735	0	323	1	10	M	48	3.Severe
737	0	324	1	13	F	68	3.Severe
738	0	325	1	4	F	51	2.Moderate
739	0	326	1	31	M	73	4.Critical/Fatal
744	0	327	1	8	M	78	3.Severe
745	0	328	1	5	M	75	4.Critical/Fatal
747	0	329	1	7	F	55	3.Severe
751	0	330	1	4	M	48	2.Moderate
752	0	331	1	31	M	78	4.Critical/Fatal
761	0	332	1	0	M	61	4.Critical/Fatal
763	0	333	1	12	F	28	4.Critical/Fatal
766	0	334	1	11	M	64	3.Severe
768	0	335	1	32	F	69	4.Critical/Fatal
776	0	336	1	5	M	89	4.Critical/Fatal
777	0	337	1	13	M	81	3.Severe
778	0	338	1	3	M	79	2.Moderate
779	0	339	1	0	F	48	1.Mild
780	0	340	1	0	M	35	1.Mild
781	0	341	1	31	F	74	4.Critical/Fatal
790	0	342	1	0	M	76	1.Mild
791	0	343	1	5	M	68	2.Moderate
792	0	344	1	5	F	68	2.Moderate
793	0	345	1	2	F	79	4.Critical/Fatal
794	0	346	1		F	72	3.Severe
796	0	347	1	13	M	74	3.Severe
798	0	348	1	6	M	78	4.Critical/Fatal
800	0	349	1	28	M	49	4.Critical/Fatal
809	0	350	1	31	M	56	4.Critical/Fatal
818	0	351	1	5	M	45	2.Moderate
819	0	352	1	3	F	71	2.Moderate
821	0	353	1	4	M	52	4.Critical/Fatal
824	0	354	1	4	M	72	2.Moderate
825	0	355	1	29	M	51	4.Critical/Fatal
835	0	356	1	38	M	55	4.Critical/Fatal
846	0	357	1	1	M	64	2.Moderate
847	0	358	1	0	F	31	1.Mild
848	0	359	1	12	F	85	3.Severe
851	0	360	1	27	F	64	4.Critical/Fatal
861	0	361	1	30	M	52	4.Critical/Fatal
866	0	362	1	0	M	43	1.Mild
867	0	363	1	3	M	75	2.Moderate
868	0	364	1	11	F	57	3.Severe
870	0	365	1	17	M	53	3.Severe
876	0	366	1	4	M	51	2.Moderate
877	0	367	1	7	M	55	3.Severe
879	0	368	1	11	F	53	4.Critical/Fatal
880	0	369	1	8	M	58	3.Severe
883	0	370	1	0	M	65	1.Mild
884	0	371	1	0	F	56	1.Mild
885	0	372	1	10	F	73	3.Severe
886	0	373	1	2	M	73	2.Moderate
887	0	374	1	2	M	40	2.Moderate
888	0	375	1	9	M	73	3.Severe
891	0	376	1	2	M	54	2.Moderate
893	0	377	1	27	M	50	4.Critical/Fatal
901	0	378	1	30	F	60	4.Critical/Fatal
909	0	379	1	0	M	49	1.Mild
910	0	380	1	0	M	51	1.Mild
911	0	381	1	2	M	55	2.Moderate
912	0	382	1	6	F	74	4.Critical/Fatal
913	0	383	1	7	F	70	3.Severe
914	0	384	1	30	F	64	4.Critical/Fatal
921	0	385	1	3	M	64	4.Critical/Fatal
922	0	386	1	7	F	71	3.Severe
924	0	387	1	5	M	77	2.Moderate
925	0	388	1	1	F	69	2.Moderate
926	0	389	1	8	M	76	3.Severe
928	0	390	1	13	F	80	3.Severe
931	0	391	1	3	M	84	4.Critical/Fatal
932	0	392	1	8	F	85	4.Critical/Fatal
934	0	393	1	9	M	83	3.Severe
935	0	394	1	3	M	51	2.Moderate
936	0	395	1	2	F	67	2.Moderate
937	0	396	1	5	M	70	2.Moderate
938	0	397	1	5	M	79	2.Moderate
940	0	398	1	10	M	63	3.Severe
941	0	399	1	5	M	72	2.Moderate
942	0	400	1	15	F	87	3.Severe
945	0	401	1	27	M	53	4.Critical/Fatal
950	0	402	1	12	M	85	3.Severe
951	0	403	1	18	M	77	3.Severe
952	0	404	1	11	M	71	3.Severe
953	0	405	1	30	F	55	4.Critical/Fatal
957	0	406	1	30	F	71	4.Critical/Fatal
961	0	407	1	21	M	75	3.Severe
966	0	408	1	6	M	73	3.Severe
968	0	409	1	6	M	75	3.Severe
970	0	410	1	4	M	74	2.Moderate
972	0	411	1	6	F	62	3.Severe
973	0	412	1	30	F	63	4.Critical/Fatal
976	0	413	1	30	M	68	4.Critical/Fatal
982	0	414	1	7	F	78	3.Severe	1	1	0	0	0	0	0	0	0	0	0	0	0
983	0	415	1	15	F	72	3.Severe	1	0	0	1	0	0	1	0	0	0	0	0	0
984	0	416	1	9	F	72	3.Severe	1	1	0	1	0	0	0	0	0	0	0	0	0
986	0	417	1	17	F	66	3.Severe	1	1	0	1	0	0	0	0	0	0	0	0	0
992	0	418	1	28	F	75	3.Severe	1	0	0	0	0	1	0	0	0	0	0	0	0
1000	0	419	1	5	M	76	2.Moderate	1	1	0	1	0	0	0	0	0	0	0	0	0
1003	0	420	1	30	F	71	4.Critical/Fatal	0	0	0	0	0	0	0	0	0	0	0	0	0
1005	0	421	1	30	M	85	4.Critical/Fatal	0	0	0	0	0	0	0	0	0	0	0	0	0
1007	0	422	1	4	M	87	4.Critical/Fatal	0	0	0	0	0	0	0	0	0	0	0	0	0
1010	0	423	1	11	M	79	4.Critical/Fatal	1	0	0	0	1	0	0	0	0	0	0	0	0
1013	0	424	1	14	M	75	3.Severe	1	1	0	0	0	0	0	0	0	0	0	0	0
1017	0	425	1	13	M	67	4.Critical/Fatal	1	1	0	0	0	0	0	0	0	0	0	0	1
1018	0	426	1	11	M	84	4.Critical/Fatal	0	0	0	0	0	0	0	0	0	0	0	0	0
1019	0	427	1	30	M	53	4.Critical/Fatal	1	0	0	0	1	0	0	0	0	0	0	0	0
1021	0	428	1	9	M	48	3.Severe	1	1	0	0	0	0	0	0	0	0	0	0	0
1025	0	429	1	13	F	77	4.Critical/Fatal	1	1	0	0	0	1	0	0	0	0	0	0	0
1031	0	430	1	4	M	73	4.Critical/Fatal	1	1	0	1	0	0	0	0	0	0	0	0	0
1032	0	431	1	18	M	58	3.Severe	1	0	0	0	0	0	0	0	0	0	0	0	1
1033	0	432	1	4	M	71	2.Moderate	0	0	0	0	0	0	0	0	0	0	0	0	0
1036	0	433	1	3	M	54	2.Moderate	0	0	0	0	0	0	0	0	0	0	0	0	0
1039	0	434	1	9	M	71	3.Severe	1	1	0	1	0	0	0	0	0	0	0	0	0
1044	0	435	1	12	M	74	3.Severe	1	1	0	0	0	1	0	0	0	0	0	0	0
1046	0	436	1	12	M	57	4.Critical/Fatal	0	0	0	0	0	0	0	0	0	0	0	0	0
1047	0	437	1	17	M	64	4.Critical/Fatal	1	0	0	0	0	1	0	0	0	0	0	0	0
1049	0	438	1	4	F	74	2.Moderate	1	1	0	0	0	0	0	0	0	0	0	0	0
1052	0	439	1	3	F	82	4.Critical/Fatal	0	0	0	0	0	0	0	0	0	0	0	0	0
1054	0	440	1	8	F	74	3.Severe	0	0	0	0	0	0	0	0	0	0	0	0	0
1055	0	441	1	9	F	89	3.Severe	1	1	0	0	0	0	0	0	0	0	0	0	0
1058	0	442	1	7	F	74	4.Critical/Fatal	0	0	0	0	0	0	0	0	0	0	0	0	0
1063	0	443	1	31	M	57	4.Critical/Fatal	0	0	0	0	0	0	0	0	0	0	0	0	0
1067	0	444	1	Transferred to another facility	F	54	4.Critical/Fatal	1	0	0	0	0	1	0	0	0	0	0	0	0
1069	0	445	1	14	M	81	3.Severe	1	1	0	0	0	0	0	0	0	0	0	0	0
1075	0	446	1	22	M	81	4.Critical/Fatal	0	0	0	0	0	0	0	0	0	0	0	0	0
1081	0	447	1	14	F	86	3.Severe	1	0	0	0	1	0	0	0	0	0	0	0	0
1087	0	448	1	3	M	55	2.Moderate	0	0	0	0	0	0	0	0	0	0	0	0	0
1089	0	449	1	8	M	52	3.Severe	0	0	0	0	0	0	0	0	0	0	0	0	0
1094	0	450	1	14	F	83	3.Severe	1	0	0	0	0	0	0	1	0	0	0	0	0
1098	0	451	1	2	F	75	2.Moderate	0	0	0	0	0	0	0	0	0	0	0	0	0
1099	0	452	1	16	M	43	4.Critical/Fatal	0	0	0	0	0	0	0	0	0	0	0	0	0
1100	0	453	1	9	M	78	4.Critical/Fatal	1	1	0	0	0	0	0	0	0	0	0	0	0
1104	0	454	1	30	M	63	3.Severe	0	0	0	0	0	0	0	0	0	0	0	0	0
1106	0	455	1	6	F	56	4.Critical/Fatal	1	0	0	0	0	0	0	1	0	0	0	0	0
1109	0	456	1	6	M	85	3.Severe	1	0	0	0	1	0	0	0	0	0	0	0	0
1111	0	457	1	13	M	64	3.Severe	1	1	0	0	0	0	0	0	0	0	0	0	0
1117	0	458	1	2	F	78	2.Moderate	1	0	0	1	0	0	0	0	0	0	0	0	0
1119	0	459	1	4	M	75	4.Critical/Fatal	0	0	0	0	0	0	0	0	0	0	0	0	0
1120	0	460	1	3	M	73	4.Critical/Fatal	1	1	0	0	0	0	0	0	0	0	0	0	0
1122	0	461	1	7	M	70	3.Severe	1	0	0	0	0	1	0	0	0	0	0	0	0
1124	0	462	1	1	M	71	2.Moderate	1	1	0	1	0	0	0	0	0	0	0	0	0
1125	0	463	1	13	M	76	4.Critical/Fatal	1	1	0	1	1	0	0	0	0	0	0	0	0
1126	0	464	1	30	F	48	3.Severe	1	0	0	0	0	1	0	0	0	0	0	0	0
1129	0	465	1	3	F	78	2.Moderate	1	0	0	1	0	0	0	0	0	0	0	0	0
1131	0	466	1	2	M	77	2.Moderate	1	0	0	0	1	0	0	0	0	0	0	0	0
1132	0	467	1	1	F	64	2.Moderate	0	0	0	0	0	0	0	0	0	0	0	0	0
1133	0	468	1	2	M	74	4.Critical/Fatal	1	0	0	0	0	1	0	0	0	0	0	0	0
1135	0	469	1	1	M	69	2.Moderate	0	0	0	0	0	0	0	0	0	0	0	0	0
1137	0	470	1	0	M	79	1.Mild	0	0	0	0	0	0	0	0	0	0	0	0	0
1138	0	471	1	8	M	78	3.Severe	0	0	0	0	0	0	0	0	0	0	0	0	0
1141	0	472	1	14	M	73	4.Critical/Fatal	1	0	0	0	0	1	0	0	0	0	0	0	0
1145	0	473	1	17	M	84	4.Critical/Fatal	0	0	0	0	0	0	0	0	0	0	0	0	0
1148	0	474	1	6	M	61	3.Severe	1	1	0	0	0	0	0	0	0	0	0	0	0
1150	0	475	1	1	F	84	4.Critical/Fatal	1	1	0	0	0	0	0	0	0	0	0	0	0
1151	0	476	1	2	F	75	2.Moderate	1	1	0	0	0	0	1	0	0	0	0	0	0
1153	0	477	1	13	M	75	4.Critical/Fatal	1	1	0	0	0	0	0	0	0	0	0	0	0
1158	0	478	1	5	M	73	2.Moderate	1	1	0	0	0	0	0	0	0	0	0	0	0
1161	0	479	1	8	F	52	3.Severe	0	0	0	0	0	0	0	0	0	0	0	0	0
1165	0	480	1	6	M	76	3.Severe	1	1	0	0	0	0	1	0	0	0	0	0	1
1169	0	481	1	1	M	55	2.Moderate	0	0	0	0	0	0	0	0	0	0	0	0	0
1170	0	482	1	1	F	66	2.Moderate	0	0	0	0	0	0	0	0	0	0	0	0	0
1171	0	483	1	3	M	58	4.Critical/Fatal	0	0	0	0	0	0	0	0	0	0	0	0	0
1172	0	484	1	2	M	72	2.Moderate	0	0	0	0	0	0	0	0	0	0	0	0	0
1174	0	485	1	10	F	80	3.Severe	1	0	0	0	0	1	0	0	0	0	0	0	1
1179	0	486	1	11	F	52	3.Severe	0	0	0	0	0	0	0	0	0	0	0	0	0
1181	0	487	1	7	F	84	4.Critical/Fatal	1	0	0	1	0	0	0	0	0	0	0	0	0
1185	0	488	1	8	M	87	4.Critical/Fatal	1	0	0	1	0	1	0	0	0	0	0	0	0
1189	0	489	1	4	M	63	2.Moderate	1	0	0	0	1	0	0	0	0	0	0	0	0
1191	0	490	1	7	F	56	3.Severe	0	0	0	0	0	0	0	0	0	0	0	0	0
1193	0	491	1	11	M	68	4.Critical/Fatal	0	0	0	0	0	0	0	0	0	0	0	0	0
1199	0	492	1	1	M	59	2.Moderate	0	0	0	0	0	0	0	0	0	0	0	0	0
1201	0	493	1	7	M	42	3.Severe	0	0	0	0	0	0	0	0	0	0	0	0	0
1203	0	494	1	4	M	65	2.Moderate	0	0	0	0	0	0	0	0	0	0	0	0	0
1206	0	495	1	22	M	67	4.Critical/Fatal	0	0	0	0	0	0	0	0	0	0	0	0	0
1212	0	496	1	2	M	86	4.Critical/Fatal	1	1	0	0	0	0	0	0	0	0	0	0	0
1214	0	497	1	26	M	49	4.Critical/Fatal	1	1	0	0	0	0	0	0	0	0	0	0	0
1216	0	498	1	5	F	22	2.Moderate	0	0	0	0	0	0	0	0	0	0	0	0	0
1220	0	499	1	0	F	87	1.Mild	0	0	0	0	0	0	0	0	0	0	0	0	0
1221	0	500	1	14	M	84	4.Critical/Fatal	1	1	0	0	0	0	0	0	0	0	0	0	0
1227	0	501	1	18	M	85	3.Severe	1	0	0	0	1	0	0	0	0	0	0	0	0
1232	0	502	1	1	F	57	2.Moderate	0	0	0	0	0	0	0	0	0	0	0	0	0
1233	0	503	1	9	M	76	4.Critical/Fatal	1	0	0	0	1	0	0	0	0	0	0	0	0
1235	0	504	1	27	M	76	3.Severe	1	1	0	0	0	1	0	0	0	0	0	0	0
1239	0	505	1	2	M	43	2.Moderate	0	0	0	0	0	0	0	0	0	0	0	0	0
1240	0	506	1	14	M	60	4.Critical/Fatal	0	0	0	0	0	0	0	0	0	0	0	0	0
1242	0	507	1	8	M	63	3.Severe	1	0	0	1	0	0	1	0	0	0	0	0	0
1244	0	508	1	1	M	73	2.Moderate	0	0	0	0	0	0	0	0	0	0	0	0	0
1245	0	509	1	6	F	56	3.Severe	0	0	0	0	0	0	0	0	0	0	0	0	0
1246	0	510	1	11	M	87	3.Severe	1	1	0	0	0	0	0	0	0	0	0	0	0
1250	0	511	1	Transferred to another facility	M	77	4.Critical/Fatal	1	1	0	0	0	0	0	0	0	0	0	0	0
1252	0	512	1	17	F	77	3.Severe	1	1	0	0	0	0	0	0	0	0	0	0	0
1258	0	513	1	7	M	82	4.Critical/Fatal	1	1	0	0	1	0	0	0	0	0	0	0	0
1261	0	514	1	19	F	79	4.Critical/Fatal	1	1	0	0	0	0	0	0	0	0	0	0	0
1269	0	515	1	4	M	70	2.Moderate	1	0	0	0	0	0	0	0	0	0	0	0	1
1271	0	516	1	10	F	79	3.Severe	1	1	0	0	0	0	0	0	0	0	0	0	0
1276	0	517	1	19	F	58	3.Severe	0	0	0	0	0	0	0	0	0	0	0	0	0
1282	0	518	1	2	M	86	4.Critical/Fatal	1	1	0	0	0	0	0	0	0	0	0	0	0
1283	0	519	1	9	M	57	3.Severe	0	0	0	0	0	0	0	0	0	0	0	0	0
1287	0	520	1	9	F	82	3.Severe	0	0	0	0	0	0	0	0	0	0	0	0	0
1291	0	521	1	0	F	66	1.Mild	1	1	0	0	0	0	0	0	0	0	0	0	0
1292	0	522	1	7	F	82	3.Severe	0	0	0	0	0	0	0	0	0	0	0	0	0
1294	0	523	1	3	F	52	2.Moderate	0	0	0	0	0	0	0	0	0	0	0	0	0
1296	0	524	1	3	F	85	4.Critical/Fatal	0	0	0	0	0	0	0	0	0	0	0	0	0
1297	0	525	1	18	M	69	4.Critical/Fatal	0	0	0	0	0	0	0	0	0	0	0	0	0
1300	0	526	1	Transferred to another facility	M	88	3.Severe	1	1	0	0	0	0	0	0	0	0	0	0	0
1302	0	527	1	18	M	87	3.Severe	1	1	0	0	0	1	0	0	0	0	0	0	0
1308	0	528	1	3	M	83	4.Critical/Fatal	0	0	0	0	0	0	0	0	0	0	0	0	0
1310	0	529	1	14	M	89	3.Severe	0	0	0	0	0	0	0	0	0	0	0	0	0
1315	0	530	1	30	M	72	4.Critical/Fatal	0	0	0	0	0	0	0	0	0	0	0	0	0
1318	0	531	1	1	M	61	2.Moderate	0	0	0	0	0	0	0	0	0	0	0	0	0
1319	0	532	1	0	M	35	1.Mild	0	0	0	0	0	0	0	0	0	0	0	0	0
1320	0	533	1	6	F	75	3.Severe	0	0	0	0	0	0	0	0	0	0	0	0	0
1324	0	534	1	17	M	89	4.Critical/Fatal	0	0	0	0	0	0	0	0	0	0	0	0	0
1329	0	535	1	22	M	69	4.Critical/Fatal	0	0	0	0	0	0	0	0	0	0	0	0	0
1330	0	536	1	6	M	67	3.Severe	0	0	0	0	0	0	0	0	0	0	0	0	0
1332	0	537	1	7	M	77	3.Severe	1	1	0	0	0	0	0	0	0	0	0	0	0
1336	0	538	1	0	F	63	1.Mild	0	0	0	0	0	0	0	0	0	0	0	0	0
1337	0	539	1	5	M	70	2.Moderate	1	1	0	0	0	0	0	0	0	0	0	0	0
1341	0	540	1	8	M	48	3.Severe	1	0	0	0	0	1	0	0	0	0	0	0	0
1345	0	541	1	4	M	65	4.Critical/Fatal	0	0	0	0	0	0	0	0	0	0	0	0	0
1347	0	542	1	7	F	34	3.Severe	0	0	0	0	0	0	0	0	0	0	0	0	0
1349	0	543	1	Transferred to another facility	F	71	3.Severe	1	0	0	0	0	1	0	0	0	0	0	0	0
1350	0	544	1	7	M	39	3.Severe	0	0	0	0	0	0	0	0	0	0	0	0	0
1355	0	545	1	4	M	57	2.Moderate	1	1	0	0	0	0	0	0	0	0	0	0	0
1357	0	546	1	Transferred to another facility	M	63	3.Severe	1	0	0	0	0	1	0	0	0	0	0	0	0
1358	0	547	1	29	F	51	4.Critical/Fatal	1	0	0	1	0	0	0	0	0	0	0	0	0
1370	0	548	1	3	M	35	4.Critical/Fatal	1	0	0	0	0	0	1	0	0	0	0	0	0
1372	0	549	1	27	M	66	3.Severe	1	0	0	0	0	0	1	0	0	0	0	0	0
1379	0	550	1	2	M	47	2.Moderate	0	0	0	0	0	0	0	0	0	0	0	0	0
1380	0	551	1	13	M	76	3.Severe	1	0	0	0	1	0	0	0	0	0	0	0	0
1384	0	552	1	12	M	50	3.Severe	1	0	0	0	0	0	0	0	0	0	0	0	1
1388	0	553	1	6	M	26	3.Severe	0	0	0	0	0	0	0	0	0	0	0	0	0
1390	0	554	1	11	M	70	4.Critical/Fatal	1	0	0	0	0	0	0	1	0	0	0	0	0
1399	0	555	1	Transferred to another facility	F	38	4.Critical/Fatal	1	0	0	0	0	0	0	0	0	0	0	0	1
1410	0	556	1	Transferred to another facility	F	71	4.Critical/Fatal	1	0	0	1	0	0	0	0	0	0	0	0	0
1421	0	557	1	7	M	81	4.Critical/Fatal	1	0	0	0	0	0	0	0	1	0	0	0	0
1423	0	558	1	14	F	40	4.Critical/Fatal	1	0	0	0	0	1	0	0	0	0	0	0	0
1434	0	559	1	16	M	80	4.Critical/Fatal	0	0	0	0	0	0	0	0	0	0	0	0	0
1445	0	560	1	44	M	75	4.Critical/Fatal	1	0	0	0	0	0	0	0	0	0	0	0	1
1456	0	561	1	8	M	73	3.Severe	1	0	0	0	0	0	0	0	0	0	0	0	1
1460	0	562	1	10	M	73	3.Severe	1	0	1	1	0	0	0	0	0	0	0	0	0
1462	0	563	1	9	M	59	3.Severe	0	0	0	0	0	0	0	0	0	0	0	0	0
1465	0	564	1	7	M	26	3.Severe	0	0	0	0	0	0	0	0	0	0	0	0	0
1468	0	565	1	7	F	63	3.Severe	1	0	0	0	1	0	0	0	0	0	0	0	0
1472	0	566	1	11	F	56	4.Critical/Fatal	1	0	0	0	0	1	0	0	1	0	0	0	0
1482	0	567	1	Transferred to another facility	M	63	4.Critical/Fatal	0	0	0	0	0	0	0	0	0	0	0	0	0
1493	0	568	1	15	M	62	3.Severe	1	0	0	0	0	0	0	0	0	0	0	0	1
1495	0	569	1	8	M	75	3.Severe	1	0	1	0	0	0	0	0	0	0	0	0	0
1498	0	570	1	3	M	48	2.Moderate	0	0	0	0	0	0	0	0	0	0	0	0	0
1501	0	571	1	9	F	56	3.Severe	1	0	1	0	0	0	0	0	0	1	0	0	0
1505	0	572	1	9	M	69	4.Critical/Fatal	1	0	0	0	0	0	0	0	0	0	0	0	1
1507	0	573	1	5	M	71	4.Critical/Fatal
1508	0	574	1	6	M	65	3.Severe
1515	0	575	1	4	F	65	2.Moderate
1516	0	576	1	13	M	64	3.Severe
1517	0	577	1	10	M	77	4.Critical/Fatal
1520	0	578	1	4	F	42	2.Moderate
1521	0	579	1	16	M	56	3.Severe
1526	0	580	1	5	M	86	4.Critical/Fatal
1528	0	581	1	14	M	78	4.Critical/Fatal
1534	0	582	1	8	F	77	4.Critical/Fatal
1539	0	583	1	15	F	66	4.Critical/Fatal
1548	0	584	1	13	F	46	3.Severe
1552	0	585	1	5	M	90	2.Moderate
1555	0	586	1	2	F	82	2.Moderate
1557	0	587	1	30	F	67	4.Critical/Fatal
1564	0	588	1	3	F	81	2.Moderate
1566	0	589	1	3	F	74	2.Moderate
1568	0	590	1	7	F	76	3.Severe
1572	0	591	1	4	M	53	2.Moderate
1576	0	592	1	11	M	68	3.Severe
1581	0	593	1	3	M	77	2.Moderate
1583	0	594	1	23	M	74	4.Critical/Fatal
1590	0	595	1	2	M	81	2.Moderate
1592	0	596	1	9	M	79	3.Severe
1595	0	597	1	2	F	85	4.Critical/Fatal
1597	0	598	1	2	F	83	2.Moderate
1599	0	599	1	11	F	69	3.Severe
1607	0	600	1	3	F	68	2.Moderate
1610	0	601	1	4	F	42	2.Moderate
1613	0	602	1	10	M	69	3.Severe
1619	0	603	1	30	M	47	4.Critical/Fatal
1627	0	604	1	19	M	65	4.Critical/Fatal
1631	0	605	1	9	M	76	4.Critical/Fatal
1635	0	606	1	2	F	78	2.Moderate
1637	0	607	1	10	M	70	3.Severe
1643	0	608	1	4	M	73	4.Critical/Fatal
1646	0	609	1	5	F	70	4.Critical/Fatal
1651	0	610	1	15	F	69	4.Critical/Fatal
1657	0	611	1	2	F	82	2.Moderate
1659	0	612	1	4	F	64	2.Moderate
1662	0	613	1	Still hospitalised	M	69	4.Critical/Fatal
1666	0	614	1	27	F	62	3.Severe
1673	0	615	1	4	M	52	2.Moderate
1676	0	616	1	10	F	81	4.Critical/Fatal
1680	0	617	1	5	F	83	4.Critical/Fatal
1684	0	618	1	8	F	76	3.Severe
1688	0	619	1	4	M	54	2.Moderate
1690	0	620	1	12	M	60	4.Critical/Fatal
1694	0	621	1	2	M	78	4.Critical/Fatal
1695	0	622	1	5	M	54	2.Moderate
1697	0	623	1	6	F	65	3.Severe
1701	0	624	1	3	M	80	4.Critical/Fatal
1704	0	625	1	30	M	74	4.Critical/Fatal
1710	0	627	1	5	F	63	2.Moderate
1714	0	628	1	3	M	71	2.Moderate
1717	0	629	1	5	M	68	2.Moderate
1720	0	630	1	3	M	65	2.Moderate
1723	0	631	1	6	M	31	3.Severe
1727	0	632	1	6	M	57	3.Severe
1731	0	633	1	7	M	61	3.Severe
1735	0	634	1	12	M	70	4.Critical/Fatal
1739	0	635	1	6	M	49	3.Severe
1742	0	636	1	5	M	73	2.Moderate
1746	0	637	1	4	M	49	2.Moderate
1749	0	638	1	2	M	74	2.Moderate
1751	0	639	1	3	M	75	2.Moderate
1754	0	640	1	24	M	72	4.Critical/Fatal
1758	0	641	1	1	M	84	4.Critical/Fatal
1760	0	642	1	7	F	47	3.Severe
1763	0	643	1	19	F	75	3.Severe
1768	0	644	1	1	F	61	2.Moderate
1770	0	645	1	13	F	64	3.Severe
1773	0	646	1	6	M	84	4.Critical/Fatal
1776	0	647	1	2	M	82	4.Critical/Fatal
1778	0	648	1	Transferred to another facility	M	75	3.Severe
1779	0	649	1	6	M	57	3.Severe
1783	0	650	1	2	M	73	4.Critical/Fatal
1784	0	651	1	16	F	40	3.Severe
1787	0	652	1	14	F	57	3.Severe
1791	0	653	1	5	M	77	4.Critical/Fatal
1794	0	654	1	2	F	62	2.Moderate
1796	0	655	1	2	M	74	2.Moderate
1798	0	656	1	3	F	75	2.Moderate
1801	0	657	1	2	F	73	2.Moderate
1803	0	658	1	20	M	63	3.Severe
1807	0	659	1	6	F	90	4.Critical/Fatal
1809	0	660	1	2	M	57	2.Moderate
1811	0	661	1	2	M	58	2.Moderate
1813	0	662	1	3	F	63	2.Moderate
1816	0	663	1	6	M	86	4.Critical/Fatal
1819	0	664	1	2	M	52	2.Moderate
1821	0	665	1	5	M	73	2.Moderate
1826	0	666	1	8	M	68	4.Critical/Fatal
1830	0	667	1	1	M	68	4.Critical/Fatal
1831	0	668	1	16	M	78	4.Critical/Fatal
1832	0	669	1	7	M	49	3.Severe
1833	0	670	1	3	F	53	2.Moderate
1835	0	671	1	Transferred to another facility	M	76	3.Severe
1836	0	672	1	7	M	75	4.Critical/Fatal
1839	0	673	1	3	F	58	2.Moderate
1841	0	674	1	3	M	67	4.Critical/Fatal
1843	0	675	1	8	M	83	3.Severe
1844	0	676	1	7	M	77	4.Critical/Fatal
1847	0	677	1	23	M	82	4.Critical/Fatal
1850	0	678	1	7	M	88	4.Critical/Fatal
1853	0	679	1	2	F	62	2.Moderate
1855	0	680	1	2	M	72	2.Moderate
1857	0	681	1	2	M	68	2.Moderate
1859	0	682	1	3	F	63	2.Moderate
1862	0	683	1	10	F	44	3.Severe
1866	0	684	1	3	F	69	2.Moderate
1868	0	685	1	3	M	75	4.Critical/Fatal
1871	0	686	1	4	M	79	4.Critical/Fatal
1875	0	687	1	3	M	77	4.Critical/Fatal
1877	0	688	1	1	M	67	2.Moderate
1879	0	689	1	11	M	87	3.Severe
1881	0	690	1	7	F	85	4.Critical/Fatal
1883	0	691	1	2	M	64	2.Moderate
1885	0	692	1	2	F	67	2.Moderate
1887	0	693	1	5	F	58	4.Critical/Fatal
1889	0	694	1	3	F	56	2.Moderate
1892	0	695	1	11	M	66	4.Critical/Fatal	1	1	0	0	0	1	0	0	0	0	0	0	0
1897	0	696	1	26	F	49	4.Critical/Fatal	1	0	1	1	0	0	1	0	0	0	0	0	0
1906	0	697	1	8	M	61	3.Severe	1	1	0	0	0	0	0	0	0	0	0	0	0
1908	0	698	1	38	M	56	4.Critical/Fatal	1	0	1	1	0	0	0	0	0	0	0	0	1
1916	0	700	1	14	M	62	3.Severe	1	0	1	1	1	0	1	0	0	0	0	0	0
1928	0	703	1	17	F	59	4.Critical/Fatal	1	0	1	0	0	0	0	0	0	0	0	0	0
1935	0	704	1	59	M	72	4.Critical/Fatal	1	0	0	1	0	0	0	0	0	0	0	0	1
1942	0	705	1	25	F	54	4.Critical/Fatal	0	0	0	0	0	0	0	0	0	0	0	0	0
1947	0	706	1	9	M	68	3.Severe	0	0	0	0	0	0	0	0	0	0	0	0	0
1948	0	707	1	20	M	42	3.Severe	0	0	0	0	0	0	0	0	0	0	0	0	0
1950	0	708	1	0	M	58	1.Mild	0	0	0	0	0	0	0	0	0	0	0	0	0
1951	0	709	1	16	M	74	4.Critical/Fatal	1	1	0	1	0	1	0	0	1	0	0	0	1
1956	0	710	1	10	M	68	4.Critical/Fatal	1	1	0	0	0	0	0	0	0	0	0	0	0
1960	0	711	1	26	F	73	4.Critical/Fatal	1	1	0	0	0	0	0	0	0	0	0	0	1
1963	0	712	1	25	F	62	4.Critical/Fatal	1	0	0	0	1	1	0	0	0	0	0	0	0
1968	0	713	1	0	F	18	1.Mild	0	0	0	0	0	0	0	0	0	0	0	0	0
1969	0	714	1	19	M	83	3.Severe	0	0	0	0	0	0	0	0	0	0	0	0	0
1970	0	715	1	16	M	74	3.Severe	1	0	0	0	0	1	0	0	0	0	0	0	0
1971	0	716	1	2	M	77	2.Moderate	1	0	0	0	1	0	0	0	0	0	0	0	0
1972	0	717	1	22	M	61	4.Critical/Fatal	1	0	0	0	0	0	0	0	0	0	0	0	0
1976	0	718	1	46	M	61	4.Critical/Fatal	1	0	1	1	0	0	0	0	0	0	0	0	1
1979	0	719	1	15	F	69	3.Severe	1	0	1	1	0	0	0	0	0	0	0	0	0
1980	0	720	1	7	M	74	3.Severe	1	0	0	0	0	0	0	1	0	0	0	0	0
1981	0	721	1	36	F	76	4.Critical/Fatal	1	1	1	0	0	0	0	0	0	0	0	0	1
1983	0	722	1	14	M	61	3.Severe	0	0	0	0	0	0	0	0	0	0	0	0	0
1984	0	723	1	22	M	70	4.Critical/Fatal	1	1	0	1	0	1	0	0	0	0	0	0	0
1986	0	724	1	26	M	77	4.Critical/Fatal	1	1	1	1	0	0	0	0	0	0	0	0	0
1988	0	725	1	14	M	69	4.Critical/Fatal	1	0	0	0	1	0	0	0	0	0	0	0	0
1989	0	726	1	15	M	54	4.Critical/Fatal	1	0	1	1	0	0	0	0	0	0	0	0	0
1991	0	728	1	0	F	67	1.Mild	0	0	0	0	0	0	0	0	0	0	0	0	0
1992	0	729	1	17	F	74	4.Critical/Fatal	1	0	1	0	0	1	0	0	0	1	0	0	1
1994	0	730	1	78	M	53	4.Critical/Fatal	1	0	1	0	0	0	0	0	1	0	0	0	0
1999	0	731	1	1	M	56	2.Moderate	1	1	0	0	0	0	0	0	0	0	0	0	0
2000	0	732	1	0	F	38	1.Mild	1	0	0	0	0	0	0	0	0	0	0	1	0
2001	0	733	1	Transferred to another facility	M	76	4.Critical/Fatal	1	0	1	1	0	0	0	0	0	0	0	0	0
2002	0	734	1	15	M	70	3.Severe	1	0	0	0	0	0	0	0	0	0	0	0	0
2003	0	735	1	21	F	73	4.Critical/Fatal	1	0	0	0	0	0	0	0	0	0	1	0	1
2010	0	736	1	1	F	33	2.Moderate	0	0	0	0	0	0	0	0	0	0	0	0	0
2011	0	737	1	51	M	57	4.Critical/Fatal	1	0	1	1	0	0	0	0	0	0	0	0	1
2014	0	738	1	12	F	62	3.Severe	0	0	0	0	0	0	0	0	0	0	0	0	0
2015	0	739	1	8	M	61	4.Critical/Fatal	1	0	0	0	0	1	0	0	1	0	0	0	0
2017	0	740	1	4	F	77	2.Moderate	1	1	0	1	0	0	0	0	0	0	0	0	0
2020	0	741	1	0	M	59	1.Mild	0	0	0	0	0	0	0	0	0	0	0	0	0
2021	0	742	1	Transferred to another facility	M	83	3.Severe	1	1	0	0	0	1	0	0	0	0	0	0	0
2023	0	743	1	8	M	78	4.Critical/Fatal	1	0	0	1	0	0	0	0	0	0	0	0	0
2026	0	744	1	12	M	71	3.Severe	0	0	0	0	0	0	0	0	0	0	0	0	0
2028	0	745	1	7	M	79	4.Critical/Fatal	1	1	0	0	0	0	0	0	0	0	0	0	0
2032	0	746	1	1	M	79	4.Critical/Fatal	1	1	0	0	0	0	0	0	0	0	0	0	0
2033	0	747	1	4	M	77	2.Moderate	0	0	0	0	0	0	0	0	0	0	0	0	0
2036	0	748	1	3	F	53	2.Moderate	0	0	0	0	0	0	0	0	0	0	0	0	0
2038	0	749	1	13	M	78	3.Severe	1	1	0	0	0	0	0	0	0	0	0	0	0
2042	0	750	1	Transferred to another facility	F	81	4.Critical/Fatal	1	1	0	0	0	0	0	0	0	0	0	0	0
2046	0	751	1	6	F	85	4.Critical/Fatal	1	1	0	0	0	0	0	0	0	0	0	0	0
2049	0	752	1	6	M	77	4.Critical/Fatal	1	0	0	1	0	0	0	0	0	0	0	0	0
2051	0	753	1	20	M	63	3.Severe	1	1	0	0	0	1	0	0	0	0	0	0	0
2056	0	754	1	2	F	86	4.Critical/Fatal	0	0	0	0	0	0	0	0	0	0	0	0	0
2057	0	755	1	0	F	71	1.Mild	1	0	0	1	0	0	0	0	0	0	0	0	0
2058	0	756	1	5	M	87	4.Critical/Fatal	1	0	0	1	0	0	0	0	0	0	0	0	0
2060	0	757	1	Transferred to another facility	M	54	3.Severe	0	0	0	0	0	0	0	0	0	0	0	0	0
2062	0	758	1	30	M	75	4.Critical/Fatal	1	1	0	0	0	0	0	0	0	0	0	0	0
2065	0	759	1	49	M	73	4.Critical/Fatal	0	0	0	0	0	0	0	0	0	0	0	0	0
2067	0	760	1	15	M	93	4.Critical/Fatal	1	1	0	0	0	1	0	0	0	0	0	0	0
2069	0	761	1	7	M	65	3.Severe	1	0	0	0	1	0	0	0	0	0	0	0	0
2072	0	762	1	1	M	65	4.Critical/Fatal	1	0	0	0	0	0	1	0	0	0	0	0	0
2074	0	763	1	9	M	84	4.Critical/Fatal	1	1	0	1	0	0	0	0	0	0	0	0	0
2078	0	764	1	2	M	81	4.Critical/Fatal	0	0	0	0	0	0	0	0	0	0	0	0	0
2080	0	765	1	8	M	82	4.Critical/Fatal	1	1	0	0	0	0	0	1	0	0	0	0	0
2082	0	766	1	0	F	59	1.Mild	0	0	0	0	0	0	0	0	0	0	0	0	0
2083	0	767	1	5	M	86	4.Critical/Fatal	0	0	0	0	0	0	0	0	0	0	0	0	0
2085	0	768	1	9	M	85	4.Critical/Fatal	1	0	0	0	1	0	0	0	0	0	0	0	0
2087	0	769	1	13	F	85	4.Critical/Fatal	0	0	0	0	0	0	0	0	0	0	0	0	0
2090	0	770	1	3	M	78	4.Critical/Fatal	1	0	0	1	0	0	0	0	0	0	0	0	0
2092	0	771	1	Transferred to another facility	F	60	3.Severe	0	0	0	0	0	0	0	0	0	0	0	0	0
2095	0	772	1	Transferred to another facility	M	72	3.Severe	0	0	0	0	0	0	0	0	0	0	0	0	0
2097	0	773	1	3	M	81	2.Moderate	1	1	0	0	0	1	0	0	0	0	0	0	0
2099	0	774	1	0	M	71	1.Mild	1	0	0	0	0	0	0	0	0	0	0	0	1
2100	0	775	1	6	F	49	3.Severe	0	0	0	0	0	0	0	0	0	0	0	0	0
2103	0	776	1	2	M	78	4.Critical/Fatal	1	1	0	1	0	0	0	0	0	0	0	0	0
2106	0	777	1	Transferred to another facility	M	74	3.Severe	1	1	0	0	0	0	0	0	0	0	0	0	0
2108	0	778	1	0	M	73	1.Mild	1	1	0	0	0	1	1	0	0	0	0	0	0
2109	0	779	1	5	F	88	4.Critical/Fatal	0	0	0	0	0	0	0	0	0	0	0	0	0
2111	0	780	1	1	M	85	4.Critical/Fatal	1	1	0	0	0	0	0	0	0	0	0	0	0
2113	0	781	1	3	F	86	2.Moderate	0	0	0	0	0	0	0	0	0	0	0	0	0
2116	0	782	1	Transferred to another facility	M	77	3.Severe	0	0	0	0	0	0	0	0	0	0	0	0	0
2117	0	783	1	10	M	84	3.Severe	1	1	0	0	0	0	0	1	0	0	0	0	1
2119	0	784	1	0	M	83	1.Mild	1	1	0	1	0	0	0	0	0	0	0	0	0
2120	0	785	1	Transferred to another facility	M	80	3.Severe	0	0	0	0	0	0	0	0	0	0	0	0	0
2122	0	786	1	Transferred to another facility	M	77	3.Severe	1	1	0	0	0	1	0	0	0	0	0	0	0
2123	0	787	1	4	M	77	2.Moderate	1	1	0	0	0	0	0	0	0	0	0	0	0
2125	0	788	1	Transferred to another facility	M	73	3.Severe	1	1	0	0	0	0	0	0	0	0	0	0	1
2127	0	789	1	24	F	70	4.Critical/Fatal	1	0	0	0	0	0	0	1	0	0	0	0	0
2129	0	790	1	0	M	87	1.Mild	0	0	0	0	0	0	0	0	0	0	0	0	0
2130	0	791	1	4	F	65	2.Moderate	0	0	0	0	0	0	0	0	0	0	0	0	0
2133	0	792	1	7	M	67	3.Severe	1	1	0	1	0	0	0	0	0	0	0	0	0
2137	0	793	1	Transferred to another facility	M	76	4.Critical/Fatal	0	0	0	0	0	0	0	0	0	0	0	0	0
2139	0	794	1	12	M	77	3.Severe	1	1	0	0	0	0	0	0	0	0	0	0	0
2144	0	795	1	2	M	30	2.Moderate	1	0	0	0	0	0	0	0	0	1	0	0	0
2146	0	796	1	2	F	37	2.Moderate	0	0	0	0	0	0	0	0	0	0	0	0	0
2147	0	797	1	Transferred to another facility	M	80	3.Severe	0	0	0	0	0	0	0	0	0	0	0	0	0
2149	0	798	1	Transferred to another facility	M	74	4.Critical/Fatal	1	1	0	0	0	1	0	0	0	0	0	0	0
2154	0	799	1	2	M	66	2.Moderate	1	0	0	1	1	0	0	0	0	0	0	0	0
2156	0	800	1	6	M	73	3.Severe	1	1	0	0	0	0	0	1	0	0	0	0	0
2159	0	801	1	5	M	36	2.Moderate	0	0	0	0	0	0	0	0	0	0	0	0	0
2162	0	802	1	1	F	75	2.Moderate	1	0	0	1	0	0	0	0	0	0	0	0	0
2163	0	803	1	5	M	82	4.Critical/Fatal	1	1	0	1	0	0	0	0	0	0	0	0	0
2164	0	804	1	2	M	92	4.Critical/Fatal	1	1	0	0	0	0	0	0	0	0	0	0	0
2166	0	805	1	Transferred to another facility	F	48	4.Critical/Fatal	1	0	0	0	0	1	0	0	0	0	0	0	0
2168	0	806	1	Transferred to another facility	F	73	4.Critical/Fatal	1	0	0	1	0	0	0	0	0	0	0	0	0
2172	0	807	1	5	M	77	2.Moderate	0	0	0	0	0	0	0	0	0	0	0	0	0
2174	0	808	1	2	F	80	4.Critical/Fatal	1	0	0	0	0	0	0	1	0	0	0	0	0
2175	0	809	1	0	M	56	1.Mild	1	1	0	0	0	0	0	0	0	0	0	0	0
2178	0	810	1	3	M	62	2.Moderate	1	0	0	0	0	1	0	0	0	0	0	0	0
2180	0	811	1	49	M	64	4.Critical/Fatal	0	0	0	0	0	0	0	0	0	0	0	0	0
2182	0	812	1	Transferred to another facility	F	53	3.Severe	0	0	0	0	0	0	0	0	0	0	0	0	0
2183	0	813	1	20	M	89	4.Critical/Fatal	1	1	0	0	0	0	0	0	0	0	0	0	0
2186	0	814	1	1	M	77	2.Moderate	1	0	0	0	1	0	0	0	0	0	0	0	0
2188	0	815	1	0	M	61	1.Mild	1	1	0	0	0	0	0	0	0	0	0	0	0
2189	0	816	1	14	M	75	3.Severe	1	1	0	0	0	0	0	0	0	0	0	0	0
2193	0	817	1	Transferred to another facility	M	89	3.Severe	1	1	0	0	0	0	0	0	0	0	0	0	0
2194	0	818	1	24	M	70	4.Critical/Fatal	0	0	0	0	0	0	0	0	0	0	0	0	0
2196	0	819	1	40	M	72	4.Critical/Fatal	1	1	0	0	0	0	0	0	0	0	0	0	0
2198	0	820	1	Transferred to another facility	M	60	4.Critical/Fatal	1	1	0	0	0	0	0	0	0	0	0	0	0
2200	0	821	1	4	M	84	2.Moderate	0	0	0	0	0	0	0	0	0	0	0	0	0
2202	0	822	1	5	M	74	4.Critical/Fatal	0	0	0	0	0	0	0	0	0	0	0	0	0
2204	0	823	1	45	M	73	4.Critical/Fatal	0	0	0	0	0	0	0	0	0	0	0	0	0
2206	0	824	1	5	F	62	2.Moderate	1	0	0	0	1	0	0	0	0	0	0	0	0
2209	0	826	1	7	M	79	4.Critical/Fatal	0	0	0	0	0	0	0	0	0	0	0	0	0
2212	0	827	1	2	M	80	4.Critical/Fatal	1	1	0	0	0	0	0	0	0	0	0	0	0
2214	0	828	1	2	M	65	2.Moderate	1	0	0	0	0	0	0	1	0	0	0	0	0
2216	0	829	1	Transferred to another facility	M	84	3.Severe	1	0	0	0	1	0	1	0	0	0	0	0	0
2220	0	830	1	Transferred to another facility	M	75	3.Severe	1	1	0	0	1	0	0	0	0	0	0	0	0
2225	0	831	1	2	M	88	4.Critical/Fatal	1	1	0	1	0	0	0	0	0	0	0	0	0
2227	0	832	1	4	M	82	4.Critical/Fatal	1	0	0	0	0	1	0	0	0	0	0	0	0
2230	0	833	1	Transferred to another facility	M	82	3.Severe	0	0	0	0	0	0	0	0	0	0	0	0	0
2233	0	834	1	4	M	78	4.Critical/Fatal	1	0	0	0	1	0	0	0	0	0	0	0	0
2234	0	835	1	35	M	66	4.Critical/Fatal	1	0	0	0	0	0	0	0	0	0	1	0	0
2236	0	836	1	0	F	75	1.Mild	0	0	0	0	0	0	0	0	0	0	0	0	0
2237	0	837	1	12	F	84	4.Critical/Fatal	1	0	0	0	1	1	0	0	0	0	0	0	0
2244	0	838	1	Transferred to another facility	F	72	4.Critical/Fatal	1	0	0	0	1	1	0	0	0	0	0	0	0
2245	0	839	1	44	M	70	4.Critical/Fatal	1	1	0	0	0	0	0	0	0	0	0	0	0
2249	0	840	1	27	M	78	4.Critical/Fatal	1	0	0	0	0	0	0	0	1	0	0	0	0
2252	0	841	1	Transferred to another facility	M	76	3.Severe	1	1	0	1	0	0	0	0	0	0	0	0	0
2254	0	842	1	10	M	77	3.Severe	0	0	0	0	0	0	0	0	0	0	0	0	0
2257	0	843	1	55	M	49	4.Critical/Fatal	1	0	0	0	0	0	0	0	1	0	0	0	0
2266	0	845	1	2	M	77	2.Moderate	1	1	0	0	0	0	0	0	0	0	0	0	0
2268	0	846	1	0	M	66	1.Mild	0	0	0	0	0	0	0	0	0	0	0	0	0
2269	0	847	1	Transferred to another facility	M	81	3.Severe	1	0	0	1	1	0	0	0	0	0	0	0	0
2273	0	848	1	8	F	66	3.Severe	1	1	0	0	0	0	0	0	0	0	0	0	0
2275	0	849	1	Transferred to another facility	F	71	3.Severe	1	1	0	0	0	0	0	0	0	0	0	0	0
2277	0	850	1	2	F	74	2.Moderate	0	0	0	0	0	0	0	0	0	0	0	0	0
2279	0	851	1	5	M	60	2.Moderate	0	0	0	0	0	0	0	0	0	0	0	0	0
2286	0	853	1	1	M	73	4.Critical/Fatal	1	1	0	1	1	0	0	0	0	0	0	0	0
2287	0	854	1	3	F	79	2.Moderate	0	0	0	0	0	0	0	0	0	0	0	0	0
2289	0	855	1	4	M	76	2.Moderate	1	1	0	0	0	0	0	0	0	0	0	0	0
2291	0	856	1	9	F	74	4.Critical/Fatal	1	0	0	1	0	0	0	0	0	0	0	0	0
2293	0	857	1	Transferred to another facility	M	75	3.Severe	1	1	0	1	0	0	0	0	0	0	0	0	0
2295	0	858	1	3	M	76	4.Critical/Fatal	1	1	0	0	0	0	0	0	0	0	0	0	0
2297	0	859	1	25	M	78	4.Critical/Fatal	1	1	0	0	0	0	0	0	0	0	0	0	0
2299	0	860	1	Transferred to another facility	F	79	3.Severe	1	1	0	0	0	0	0	0	0	0	0	0	0
2300	0	861	1	0	F	79	1.Mild	1	1	0	0	0	0	0	0	0	0	0	0	0
2301	0	862	1	0	F	69	1.Mild	1	0	0	0	0	1	0	0	0	0	0	0	0
2302	0	863	1	2	F	84	2.Moderate	1	1	0	0	0	0	0	0	0	0	0	0	0
2304	0	864	1	2	M	73	2.Moderate	1	1	0	0	0	0	0	0	0	0	0	0	0
2306	0	865	1	Transferred to another facility	M	71	4.Critical/Fatal	1	0	0	0	0	1	0	0	1	0	0	0	0
2309	0	866	1	5	M	73	2.Moderate	1	1	0	0	0	0	0	0	0	0	0	0	0
2311	0	867	1	6	M	81	4.Critical/Fatal	1	1	0	0	0	0	0	0	0	0	0	0	0
2314	0	868	1	4	M	57	2.Moderate	0	0	0	0	0	0	0	0	0	0	0	0	0
2315	0	869	1	2	F	76	4.Critical/Fatal	1	1	0	0	0	0	0	0	0	0	0	0	0
2316	0	870	1	Transferred to another facility	M	50	4.Critical/Fatal	1	0	0	1	0	0	0	0	0	0	0	0	0
2318	0	871	1	0	F	29	1.Mild	1	0	0	0	0	0	0	1	0	0	0	0	0
2319	0	872	1	4	M	76	2.Moderate	1	1	0	0	0	0	0	0	0	0	0	0	0
2322	0	873	1	Transferred to another facility	M	79	3.Severe	0	0	0	0	0	0	0	0	0	0	0	0	0
2323	0	874	1	9	M	74	4.Critical/Fatal	1	1	0	1	0	0	0	0	0	0	0	0	0
2329	0	875	1	31	F	44	3.Severe	1	0	0	0	1	0	0	0	0	0	1	0	0
2338	0	876	1	12	F	78	3.Severe	1	0	0	0	1	0	0	1	0	0	0	0	0
2340	0	877	1	16	M	75	4.Critical/Fatal	1	1	0	0	0	0	0	0	0	0	0	0	0
2346	0	879	1	4	M	55	2.Moderate	0	0	0	0	0	0	0	0	0	0	0	0	0
2349	0	880	1	3	F	85	2.Moderate	1	1	0	0	0	0	0	0	0	0	0	0	0
2352	0	881	1	33	F	68	4.Critical/Fatal	0	0	0	0	0	0	0	0	0	0	0	0	0
2355	0	882	1	2	M	69	2.Moderate	0	0	0	0	0	0	0	0	0	0	0	0	0
2357	0	883	1	5	M	73	4.Critical/Fatal	0	0	0	0	0	0	0	0	0	0	0	0	0
2359	0	884	1	12	M	84	4.Critical/Fatal	1	1	0	0	0	1	0	0	0	0	0	0	0
2361	0	885	1	68	M	73	4.Critical/Fatal	1	1	0	0	0	0	0	0	0	0	0	0	0
2364	0	886	1	3	M	67	2.Moderate	1	0	0	0	0	0	0	0	1	0	0	0	0
2366	0	887	1	8	M	89	4.Critical/Fatal	1	0	0	0	0	0	0	1	0	0	0	0	0
2368	0	888	1	6	M	61	4.Critical/Fatal	1	0	0	0	1	0	0	0	0	0	0	0	0
2373	0	890	1	Transferred to another facility	M	82	3.Severe	1	1	0	0	0	0	0	0	0	0	0	0	0
2375	0	891	1	2	F	56	2.Moderate	1	0	0	0	0	0	0	1	1	0	0	0	0
2377	0	892	1	7	M	68	4.Critical/Fatal	0	0	0	0	0	0	0	0	0	0	0	0	0
2381	0	893	1	5	M	85	4.Critical/Fatal	1	1	0	0	0	0	0	0	0	0	0	0	0
2383	0	894	1	2	M	82	2.Moderate	1	1	0	0	0	0	0	0	0	0	0	0	0
2386	0	895	1	0	F	72	2.Moderate	0	0	0	0	0	0	0	0	0	0	0	0	0
2390	0	896	1	2	M	87	2.Moderate	1	0	0	0	0	1	0	0	0	0	0	0	0
2393	0	897	1	7	F	66	4.Critical/Fatal	1	0	0	0	1	0	0	0	0	0	0	0	0
2395	0	898	1	7	M	63	3.Severe	1	1	0	1	0	0	0	0	0	0	0	0	0
2398	0	899	1	5	F	83	4.Critical/Fatal	1	1	0	0	0	0	0	0	0	0	0	0	0
2400	0	900	1	35	M	76	4.Critical/Fatal	0	0	0	0	0	0	0	0	0	0	0	0	0
2402	0	901	1	8	M	80	3.Severe	1	1	0	1	0	0	0	0	0	0	0	0	0
2407	0	902	1	3	F	76	4.Critical/Fatal	1	0	0	0	1	1	0	0	0	0	0	0	0
2409	0	903	1	13	M	86	4.Critical/Fatal	1	1	0	0	0	0	0	0	0	0	0	0	0
2411	0	904	1	36	M	77	4.Critical/Fatal	1	1	0	0	1	0	0	0	0	0	0	0	0
2414	0	905	1	0	F	39	1.Mild	0	0	0	0	0	0	0	0	0	0	0	0	0
2415	0	906	1	8	M	85	4.Critical/Fatal	1	0	0	0	0	1	0	0	0	0	0	0	0
2421	0	907	1	Transferred to another facility	M	80	4.Critical/Fatal	0	0	0	0	0	0	0	0	0	0	0	0	0
2423	0	908	1	5	M	74	4.Critical/Fatal	1	1	0	0	0	0	0	0	0	0	0	0	0
2425	0	909	1	Transferred to another facility	F	59	3.Severe	0	0	0	0	0	0	0	0	0	0	0	0	0
2426	0	910	1	2	M	82	4.Critical/Fatal	1	1	0	0	0	0	0	0	0	0	0	0	0
2427	0	911	1	13	F	72	3.Severe	1	1	0	1	0	1	0	0	0	0	0	0	0
2431	0	912	1	3	M	87	4.Critical/Fatal	1	1	0	0	0	0	0	0	0	0	0	0	0
2432	0	913	1	70	F	76	4.Critical/Fatal	1	0	0	0	1	0	0	0	0	0	0	0	0
2435	0	914	1	6	F	90	4.Critical/Fatal	1	1	0	0	0	0	0	0	0	0	0	0	0
2437	0	915	1	3	M	55	2.Moderate	1	0	0	0	0	1	0	0	0	0	0	0	0
2439	0	916	1	14	M	80	4.Critical/Fatal	1	1	0	0	0	0	0	0	0	0	0	0	0
2440	0	917	1	5	M	81	4.Critical/Fatal	1	1	0	0	0	0	0	0	0	0	0	0	0
2442	0	918	1	11	F	62	3.Severe	1	0	0	0	0	0	0	0	0	1	0	0	0
2447	0	919	1	13	M	89	4.Critical/Fatal	0	0	0	0	0	0	0	0	0	0	0	0	0
2448	0	920	1	17	F	73	4.Critical/Fatal	1	0	0	0	0	0	0	0	0	0	1	0	0
2450	0	921	1	Transferred to another facility	F	92	3.Severe	0	0	0	0	0	0	0	0	0	0	0	0	0
2451	0	922	1	2	F	85	4.Critical/Fatal	1	1	0	0	0	0	0	0	0	0	0	0	0
2453	0	923	1	3	M	41	2.Moderate	0	0	0	0	0	0	0	0	0	0	0	0	0
2455	0	924	1	2	F	78	4.Critical/Fatal	1	0	0	0	0	0	0	1	0	0	0	0	0
2456	0	925	1	1	M	62	2.Moderate	0	0	0	0	0	0	0	0	0	0	0	0	0
2458	0	926	1	0	F	62	1.Mild	0	0	0	0	0	0	0	0	0	0	0	0	0
2459	0	927	1	2	M	87	4.Critical/Fatal	1	0	0	1	0	0	0	0	0	0	0	0	0
2460	0	928	1	3	F	73	2.Moderate	1	0	0	0	1	0	0	0	0	0	0	0	0
2463	0	929	1	3	F	90	4.Critical/Fatal	1	1	0	1	0	0	0	0	0	0	0	0	0
2464	0	930	1	2	F	94	4.Critical/Fatal	1	1	0	0	0	0	0	0	0	0	0	0	0
2465	0	931	1	5	M	88	2.Moderate	1	0	0	1	0	0	0	0	0	0	0	0	0
2467	0	932	1	0	M	52	1.Mild	1	0	0	0	0	0	0	0	1	0	0	0	0
2468	0	933	1	Transferred to another facility	F	58	3.Severe	1	0	0	0	0	1	0	0	0	0	0	0	0
2470	0	934	1	Transferred to another facility	F	63	3.Severe	0	0	0	0	0	0	0	0	0	0	0	0	0
2471	0	935	1	Transferred to another facility	F	68	4.Critical/Fatal	1	0	0	1	0	0	0	0	0	0	0	0	0
2474	0	936	1	Transferred to another facility	M	69	3.Severe	1	1	0	1	0	0	0	0	0	0	0	0	0
2476	0	937	1	2	F	76	2.Moderate	1	0	0	0	0	1	0	0	0	0	0	0	0
2477	0	938	1	Transferred to another facility	M	59	4.Critical/Fatal	0	0	0	0	0	0	0	0	0	0	0	0	0
2480	0	939	1	3	M	56	2.Moderate	1	1	0	1	0	0	0	0	0	0	0	0	0
2482	0	940	1	4	M	83	4.Critical/Fatal	1	0	0	1	0	0	0	1	0	0	0	0	0
2484	0	941	1	10	M	72	4.Critical/Fatal	1	1	0	0	0	0	0	0	0	0	0	0	0
2485	0	942	1	Transferred to another facility	M	55	4.Critical/Fatal	1	0	0	0	0	0	0	0	1	0	0	0	0
2488	0	943	1	12	M	87	4.Critical/Fatal	1	0	0	0	0	0	0	1	0	0	0	0	0
2491	0	944	1	Transferred to another facility	F	64	4.Critical/Fatal	1	0	0	0	0	1	0	0	0	0	0	0	0
2494	0	945	1	10	F	77	3.Severe	1	1	0	1	1	1	0	0	0	0	1	0	0
2497	0	946	1	7	F	62	3.Severe	0	0	0	0	0	0	0	0	0	0	0	0	0
2502	0	947	1	42	F	64	4.Critical/Fatal	0	0	0	0	0	0	0	0	0	0	0	0	0
2504	0	948	1	7	M	91	4.Critical/Fatal	1	1	0	0	0	0	0	0	0	0	0	0	0
2508	0	949	1	5	F	88	4.Critical/Fatal	1	1	0	0	0	0	0	1	0	0	0	0	0
2510	0	950	1	2	M	86	2.Moderate	0	0	0	0	0	0	0	0	0	0	0	0	0
2512	0	951	1	6	F	86	4.Critical/Fatal	1	1	0	0	0	0	0	0	0	0	0	0	0
2514	0	952	1	6	M	88	4.Critical/Fatal	0	0	0	0	0	0	0	0	0	0	0	0	0
2517	0	953	1	2	F	33	2.Moderate	0	0	0	0	0	0	0	0	0	0	0	0	0
2519	0	954	1	7	F	63	4.Critical/Fatal	1	0	0	1	0	0	0	0	0	0	0	0	0
2520	0	955	1	39	M	75	4.Critical/Fatal	0	0	0	0	0	0	0	0	0	0	0	0	0
2523	0	956	1	Transferred to another facility	M	61	4.Critical/Fatal	1	0	0	1	0	0	0	0	0	0	0	0	0
2525	0	957	1	6	M	84	4.Critical/Fatal	1	1	0	1	0	0	0	0	0	0	0	0	0
2527	0	958	1	Transferred to another facility	F	58	3.Severe	0	0	0	0	0	0	0	0	0	0	0	0	0
2528	0	959	1	8	F	82	3.Severe	1	0	0	1	0	0	0	1	0	0	0	0	0
2531	0	960	1	7	M	82	3.Severe	1	0	0	0	1	0	0	0	0	0	0	0	0
2534	0	961	1	7	M	76	3.Severe	1	0	0	0	0	0	0	0	0	0	0	0	1
2536	0	962	1	6	M	82	4.Critical/Fatal	1	1	0	0	0	0	1	0	0	0	0	0	0
2538	0	963	1	10	M	78	3.Severe	0	0	0	0	0	0	0	0	0	0	0	0	0
2540	0	964	1	Transferred to another facility	M	56	3.Severe	0	0	0	0	0	0	0	0	0	0	0	0	0
2541	0	965	1	3	M	87	4.Critical/Fatal	1	1	0	0	0	1	0	0	0	0	0	0	0
2543	0	966	1	7	M	70	3.Severe	0	0	0	0	0	0	0	0	0	0	0	0	0
2548	0	967	1	11	M	68	4.Critical/Fatal	1	1	0	0	1	0	0	0	0	0	0	0	0
2550	0	968	1	4	M	78	2.Moderate	0	0	0	0	0	0	0	0	0	0	0	0	0
2554	0	970	1	0	F	38	1.Mild	0	0	0	0	0	0	0	0	0	0	0	0	0
2555	0	971	1	2	M	73	4.Critical/Fatal	1	1	0	0	0	1	0	0	0	0	0	0	0
2559	0	972	1	7	F	74	3.Severe	1	0	0	0	1	0	0	0	0	0	0	0	0
2561	0	973	1	6	M	62	3.Severe	1	1	0	0	0	0	0	0	0	0	0	0	0
2564	0	974	1	7	M	71	3.Severe	0	0	0	0	0	0	0	0	0	0	0	0	0
2566	0	975	1	11	M	69	3.Severe	1	1	0	0	0	0	0	0	0	0	0	0	0
2568	0	976	1	2	F	76	2.Moderate	1	0	0	0	1	0	0	0	0	0	0	0	0
2570	0	977	1	35	F	55	3.Severe	0	0	0	0	0	0	0	0	0	0	0	0	0
2573	0	978	1	7	F	76	3.Severe	0	0	0	0	0	0	0	0	0	0	0	0	0
2576	0	979	1	Transferred to another facility	M	73	4.Critical/Fatal	1	1	0	1	0	0	0	0	0	0	0	0	0
2578	0	980	1	4	M	56	2.Moderate	0	0	0	0	0	0	0	0	0	0	0	0	0
2580	0	981	1	15	M	87	4.Critical/Fatal	1	0	0	0	0	1	0	0	0	0	0	0	0
2582	0	982	1	4	M	81	4.Critical/Fatal	1	1	0	0	0	0	0	1	0	0	0	0	0
2583	0	983	1	7	M	77	4.Critical/Fatal	1	0	0	0	1	0	0	0	0	0	0	0	0
2586	0	984	1	3	M	81	2.Moderate	1	1	0	0	0	0	0	1	0	0	0	0	0
2588	0	985	1	6	M	66	3.Severe	1	0	0	0	0	1	0	0	0	0	0	0	0
2591	0	986	1	15	F	19	3.Severe	1	0	0	0	0	0	0	0	1	0	0	0	0
2593	0	987	1	4	M	50	2.Moderate	1	0	0	1	0	0	0	0	1	0	0	0	0
2596	0	988	1	3	F	58	2.Moderate	0	0	0	0	0	0	0	0	0	0	0	0	0
2605	0	990	1	1	M	79	2.Moderate	0	0	0	0	0	0	0	0	0	0	0	0	0
2607	0	991	1	8	F	78	3.Severe	1	1	0	0	0	0	0	0	0	0	0	0	0
2609	0	992	1	13	M	81	3.Severe	1	1	0	1	0	0	0	0	0	0	0	0	0
2614	0	993	1	5	M	90	4.Critical/Fatal	1	0	0	0	0	0	0	0	0	0	1	0	0
2617	0	994	1	0	F	30	1.Mild	0	0	0	0	0	0	0	0	0	0	0	0	0
2618	0	995	1	Transferred to another facility	M	65	4.Critical/Fatal	1	0	0	0	0	0	0	0	0	0	0	0	1
2621	0	996	1	4	M	83	4.Critical/Fatal	1	0	0	0	1	0	0	0	0	0	0	0	0
2624	0	997	1	17	M	60	4.Critical/Fatal	0	0	0	0	0	0	0	0	0	0	0	0	0
2631	0	999	1	Transferred to another facility	M	87	2.Moderate	0	0	0	0	0	0	0	0	0	0	0	0	0
