# Supplementary material for: A novel haemocytometric COVID-19 prognostic score developed and validated in an observational multicentre European hospital-based study
Source: eLife journal article supplement (doi:10.7554/elife.63195), 2020-11-26
Supplement: supp [file elife-63195-supp-v1.zip › elife_poa_e63195_Table_2_source_data_1.csv]

Table 2 - Source data file 1: Source data for demographic and first haemocytometric data available for patients at hospital presentation or within 3 days after admission
Filename	exclusion	Pat_ID	Baseline	length_of_hospitalisation	Sex	age	days_of_symptoms_before_measurement	Critical_or_Fatal	WBC(10^3/uL)	RBC(10^6/uL)	HGB(g/dL)	MCV(fL)	PLT(10^3/uL)	NRBC#(10^3/uL)	NEUT#(10^3/uL)	LYMPH#(10^3/uL)	MONO#(10^3/uL)	EO#(10^3/uL)	BASO#(10^3/uL)	IG#/L#	IG#(10^3/uL)	RET#(10^6/uL)	RET-He(pg)	IPF(%)	MicroR(%)	Delta-He(pg)	HYPO-He(%)	IPF#(10^3/uL)	NEUT-RI(FI)	NEUT-GI(SI)	RE-LYMP%L(%)	Re-Mono%M	AS-LYMP%L(%)	N/L ratio
1	0	1	1	0	M	58	7	1	5.9	5.57	17.2	83.8	137	0	2.77	2.44	0.56	0.1	0.03	1.2	0.03	0.0565	33.9	14.21938479	2.2	1.9	0.1	19.48	50.9	156.9	6.1	0.974658869	2.459016393	1.135245902
2	0	1	0	2	M	58	9	1	4.91	5.11	15.6	85.3	118	0	3.09	1.45	0.34	0	0.03	1.4	0.02	0.0496	34.1	5.4	1.9	2.3	0.05	6.40	50.8	156.3	7.6	1.954397394	3.448275862	2.131034483
3	0	1	0	2	M	58	9	1	5.49	4.74	14.9	84.8	111	0	3.99	1.16	0.31	0	0.03	5.2	0.06	0.0417	33	7.133058985	2.3	1.1	0.05	7.92	55.9	155.8	7.8	11.15107914	2.586206897	3.439655172
4	0	1	0	3	M	58	10	1	6.05	4.85	14.8	86.6	120	0.01	4.74	1	0.26	0.02	0.03	6.0	0.06	0.0412	33.2	11.42857143	2.2	1.4	0.05	13.71	54.5	156.7	10	20.70484581	3	4.74
5	0	1	0	4	M	58	11	1	4.28	4.63	14.4	88.3	164	0	2.72	1.16	0.26	0.12	0.02	3.4	0.04	0.0319	33.1	8.989334688	1.8	1.2	0.1	14.74	56.3	154.7	12.1	26.63755459	4.310344828	2.344827586
6	0	1	0	15	M	58	22	1	8.4	4.14	12.8	89.6	339	0	6.11	1.48	0.66	0.05	0.1	4.1	0.06	0.0422	34.2	2.633870266	1.3	2.8	0.1	24.75	52.7	155.9	11.5	0.844594595	2.702702703	4.128378378
7	0	2	1	0	M	51	10	0	8	5.76	16.5	83.2	231	0	6.22	0.97	0.78	0.01	0.02	9.3	0.09	0.0337	32.6	12.26912929	3.3	2.7	0.2	28.34	47.3	162.5	11.3	1.420454545	6.18556701	6.412371134
8	0	2	0	1	M	51	11	0	6.09	5.41	15.1	82.8	344	0	3.82	1.41	0.83	0.01	0.02	4.3	0.06	0.0309	32.8	7.104913679	3.1	3.1	0.1	24.44	45.3	164	10.6	1.98938992	4.964539007	2.709219858
9	0	2	0	2	M	51	12	0	6.57	5.29	15	83.9	423	0	4.13	1.28	1.1	0.04	0.02	5.5	0.07	0.0386	30.4	6.169135571	2.8	0.7	0.1	52.88	47.3	162.5	8.6	0.521920668	3.125	3.2265625
10	0	2	0	3	M	51	13	0	7.06	5.12	14.3	83.2	482	0	3.98	1.75	1.24	0.06	0.03	4.6	0.08	0.0379	29.6	5.573933179	3	-0.2	0.2	58.32	48	160.1	8	0.537153089	2.285714286	2.274285714
11	0	2	0	4	M	51	14	0	6.96	5.16	14.8	84.3	550	0	3.34	2.11	1.34	0.12	0.05	5.2	0.11	0.0423	30.2	4.145299145	2.9	0.6	0.1	43.45	48.4	161.2	7.6	0.661703888	1.421800948	1.582938389
12	0	2	0	6	M	51	16	0	7.52	5.4	14.9	83.5	648	0	3.9	2.11	1.27	0.17	0.07	5.2	0.11	0.0432	32.1	4.092339979	3	2.5	0.1	46.01	48.9	161.3	5.7	0.623885918	0.473933649	1.848341232
13	0	3	1	0	M	51	9	1	5.08	4.09	12.4	88	147	0	4.03	0.74	0.3	0	0.01	2.7	0.02	0.0173	28.2	11.12676056	3	-2.5	0.7	16.36	53.8	155.6	13.5	9.824561404	4.054054054	5.445945946
14	0	3	0	1	M	51	10	1	4.05	3.83	11.5	89	155	0.01	2.81	1.05	0.18	0	0.01	1.9	0.02	0.0193	28.8	7.631991636	3.1	-2	0.6	11.83	55.4	156	15.2	6.875	5.714285714	2.676190476
15	0	3	0	1	M	51	10	1	3.33	3.6	10.8	87.8	144	0	2.86	0.37	0.08	0.01	0.01	5.4	0.02	0.014	28.8	3.736377789	3.4	-2.1	0.9	5.38	54.5	153.1	10.8	41.42857143	2.702702703	7.72972973
16	0	3	0	2	M	51	11	1	6.71	3.95	11.8	88.9	192	0	5.84	0.75	0.1	0.01	0.01	14.7	0.11	0.0249	28	4.355989486	3	-2.8	1.4	8.36	56.4	150.5	14.7	21.73913043	5.333333333	7.786666667
17	0	3	0	3	M	51	12	1	6.52	4.39	12.9	88.8	214	0.01	5.26	1.04	0.06	0.14	0.02	6.7	0.07	0.0255	29.3	4.127198917	3.3	-1.4	0.7	29.75	58.7	150.4	18.3	40	7.692307692	5.057692308
18	0	3	0	4	M	51	13	1	4.35	4.19	12.4	90.2	222	0	3.32	0.67	0.1	0.23	0.03	6.0	0.04	0.0193	28.4	3.887762001	3	-1.7	2.4	7.99	64.1	149.9	25.4	60.63829787	10.44776119	4.955223881
19	0	3	0	4	M	51	13	1	4.03	3.89	11.6	90.2	216	0.01	3.08	0.62	0.13	0.18	0.02	6.5	0.04	0.0132	27.8	4.473039216	3.3	-2	2.8	4.75	62.6	150.2	27.4	42.98245614	9.677419355	4.967741935
20	0	3	0	5	M	51	14	1	4.8	4.02	11.8	90.8	227	0	3.71	0.72	0.18	0.17	0.02	5.6	0.04	0.0173	31.7	4.921259843	3.2	1.4	1	12.49	62.4	149.6	27.8	33.33333333	9.722222222	5.152777778
21	0	3	0	6	M	51	15	1	5.28	3.94	11.7	90.4	240	0	3.82	1.05	0.24	0.16	0.01	4.8	0.05	0.0126	29.8	5.737956428	3.3	-0.1	2.4	11.76	59.6	146.4	23.8	17.45283019	6.666666667	3.638095238
22	0	3	0	7	M	51	16	1	4.04	3.45	10.2	87.8	200	0	2.82	0.93	0.19	0.08	0.02	8.6	0.08	0.0155	27.6	8.435421771	3.8	-2.5	2.1	27.00	60.8	149.4	31.2	16.93121693	4.301075269	3.032258065
23	0	3	0	8	M	51	17	1	3.81	3.38	9.9	88.8	253	0.01	2.36	1.11	0.24	0.08	0.02	9.0	0.1	0.0149	26.9	7.638279192	3.8	-3	2.3	11.89	54.1	146.3	29.7	10.47619048	3.603603604	2.126126126
24	0	3	0	9	M	51	18	1	5.28	3.61	10.5	91.1	367	0	3.13	1.57	0.45	0.1	0.03	10.8	0.17	0.0274	26	8.026342869	3.1	-4.4	1.1	46.24	57.6	152.4	29.9	4.842615012	3.184713376	1.993630573
25	0	3	0	10	M	51	19	1	5.82	3.69	10.7	90	453	0.01	3.76	1.44	0.48	0.1	0.04	13.2	0.19	0.0273	26.6	6.025780401	3.3	-3.8	1.2	78.82	54	151.9	25	4.308390023	2.083333333	2.611111111
26	0	3	0	11	M	51	20	1	4.97	3.43	9.9	89.2	491	0	2.9	1.41	0.58	0.04	0.04	8.5	0.12	0.0521	27.2	5.670407561	3.7	-3.3	1.1	161.54	54.6	156.4	24.1	3.861003861	1.418439716	2.056737589
27	0	3	0	12	M	51	21	1	5.1	3.23	9.5	89.5	525	0.01	3.12	1.01	0.9	0.04	0.03	8.9	0.09	0.0672	28.8	4.198880299	3.3	-1.3	1.8	159.60	53.8	154	26.7	1.96801968	0.99009901	3.089108911
28	0	3	0	13	M	51	22	1	6.03	3.22	9.3	89.8	655	0	3.6	1.24	1.11	0.03	0.05	8.1	0.1	0.0873	29	2.994734533	3.8	-1	1.7	178.82	52	154.9	24.2	2.07253886	1.612903226	2.903225806
29	0	4	1	0	F	74	10	1	6.87	3.36	9.5	83.9	160	0.01	5.94	0.71	0.2	0.01	0.01	8.5	0.06	0.0186	30.8	6.265060241	5	1.3	0.9	10.02	55.5	154.3	1.4	8.670520231	0	8.366197183
30	0	4	0	1	F	74	11	1	11.45	3.42	9.8	83.6	166	0	10.99	0.21	0.22	0	0.03	76.2	0.16	0.0229	30.4	5.36036036	5.2	1	0.9	8.90	55.1	153.2	14.3	4.926108374	4.761904762	52.33333333
31	0	4	0	1	F	74	11	1	13.52	3.14	8.9	82.8	173	0	12.98	0.36	0.16	0	0.02	33.3	0.12	0.0182	29.2	6.180524678	5.8	-0.1	1.1	10.69	57	152.1	2.8	7.638888889	0	36.05555556
32	0	4	0	2	F	74	12	1	6.45	2.8	7.9	82.1	145	0.01	5.87	0.4	0.17	0	0.01	12.5	0.05	0.0171	29.4	7.168831169	6.1	0	1.1	10.39	54.1	151.3	2.5	1.948051948	0	14.675
33	0	4	0	3	F	74	13	1	8.46	2.83	7.9	83	175	0	8.21	0.15	0.1	0	0	46.7	0.07	0.0232	27.7	7.125545322	5.8	-1.2	1.7	12.47	56.1	147.6	6.7	3.191489362	0	54.73333333
34	0	4	0	4	F	74	14	1	10.87	2.96	8.2	84.5	172	0	10.43	0.16	0.27	0	0.01	75.0	0.12	0.0225	28.6	5.73012939	5	0	2	20.12	56.7	145.8	12.5	1.659751037	0	65.1875
35	0	4	0	5	F	74	15	1	13.65	2.92	8.1	86	156	0	13.25	0.1	0.27	0.01	0.02	300.0	0.3	0.0222	27.5	4.721030043	4.8	-0.2	3.5	30.58	55.9	143.6	20	2.448979592	10	132.5
36	0	4	0	6	F	74	16	1	6.85	2.24	6.5	86.2	87	0.02	6.13	0.29	0.16	0.26	0.01	148.3	0.43	0.0181	28.8	8.278145695	4.5	2.4	5.9	19.75	57.1	143.7	20.7	10.07194245	6.896551724	21.13793103
37	0	4	0	7	F	74	17	1	14.13	3.28	9.3	85.4	131	0.01	13.37	0.41	0.29	0.02	0.04	202.4	0.83	0.0308	27.9	8.861502347	4.7	0	2.2	21.48	53.8	145.9	22	1.968503937	7.317073171	32.6097561
38	0	4	0	8	F	74	18	1	9.16	2.73	7.5	84.2	96	0.05	8.39	0.41	0.29	0.04	0.03	104.9	0.43	0.0371	26.3	8.7	5.7	-1.9	2.1	8.40	61	148.6	48.8	14.06844106	29.26829268	20.46341463
39	0	4	0	9	F	74	19	1	12.89	2.88	8	84.4	117	0.05	11.59	0.72	0.51	0.02	0.05	119.4	0.86	0.0562	27	7.4	5.8	-1.4	1.6	8.70	59.2	149.2	61.1	6.157112527	36.11111111	16.09722222
40	0	4	0	10	F	74	20	1	14.25	2.5	7	83.2	109	0.06	12.58	0.97	0.65	0.02	0.03	87.6	0.85	0.0668	29.5	8.9	6.3	0.8	1.2	9.70	57	153.3	59.8	3.767123288	27.83505155	12.96907216
41	0	4	0	10	F	74	20	1	13.11	2.39	6.7	84.1	111	0.04	11.33	1.05	0.64	0.04	0.05	75.2	0.79	0.0614	30.2	9.8	5.6	1.4	1.2	10.90	60.9	151.9	60	4.475043029	26.66666667	10.79047619
42	0	4	0	11	F	74	21	1	19.34	3.23	9.1	83.3	125	0.03	16.65	1.5	1.1	0.02	0.07	44.0	0.66	0.1021	32.8	9.5	5.4	3.4	0.8	11.90	57.9	152.9	40	2.335025381	16	11.1
43	0	4	0	12	F	74	22	1	13.22	2.89	8.1	83.7	35	0	11.74	1.08	0.35	0.02	0.03	15.7	0.17	0.0803	33.1	12.48826291	5	4.2	1	5.81	55.2	154.5	33.3	1.880877743	6.481481481	10.87037037
44	0	4	0	13	F	74	23	1	13.75	3.09	8.8	84.5	56	0	12.23	0.9	0.59	0	0.03	22.2	0.2	0.0865	33.2	8.7	4.8	4.3	1.1	9.70	51.9	155.2	23.3	0.952380952	4.444444444	13.58888889
45	0	4	0	14	F	74	24	1	14.7	3.33	9.4	85	134	0.01	12.36	1.53	0.75	0.03	0.03	18.3	0.28	0.1062	33.7	8.4	4.6	5	1.3	11.30	53.8	153.2	22.2	1.1994003	5.22875817	8.078431373
46	0	5	1	0	F	66	14	0	9.6	4.73	13.7	83.9	192	0	8.1	0.58	0.9	0	0.02	13.8	0.08	0.0374	31.8	16.04572396	3.1	1.4	0.1	30.81	51.5	150	10.3	1.242236025	0	13.96551724
47	0	5	0	1	F	66	15	0	9.13	4.45	13	86.1	173	0	7.94	0.5	0.67	0	0.02	16.0	0.08	0.0314	30.5	7.516339869	2.4	0.2	0.2	13.00	52.2	150.7	24	0.527240773	0	15.88
48	0	6	1	0	F	55	8	0	4.68	4.57	13.7	85.3	280	0	3.54	0.71	0.38	0.03	0.02	2.8	0.02	0.0261	34.5	4.729904368	1.7	3.3	0.1	13.24	49.1	156.4	21.1	2.61627907	9.85915493	4.985915493
49	0	6	0	2	F	55	10	0	4.27	4.41	13.5	86.6	293	0	3.23	0.58	0.39	0.05	0.02	6.9	0.04	0.0238	33.1	4.415218412	1.6	1.9	0.2	12.94	49.5	152.9	20.7	2.18579235	10.34482759	5.568965517
50	0	6	0	3	F	55	11	0	4.23	4.06	12.2	87.9	322	0	2.95	0.7	0.46	0.1	0.02	10.0	0.07	0.0199	32.4	3.160726295	1.2	1.2	0.2	10.18	49.6	152	24.3	4.668304668	8.571428571	4.214285714
51	0	6	0	5	F	55	13	0	5.05	3.93	11.7	88.8	470	0	3.5	0.78	0.56	0.19	0.02	19.2	0.15	0.0232	30.3	2.200488998	1.1	-0.9	0.1	10.34	49.2	146.3	25.6	3.168316832	10.25641026	4.487179487
52	0	7	1	0	F	58	7	0	5.77	4.33	12.7	85.7	185	0	4.16	1.3	0.3	0	0.01	2.3	0.03	0.042	30.4	11.50021617	2.1	-0.6	0.1	21.28	54.9	150.8	20	3.358208955	6.923076923	3.2
53	0	7	0	2	F	58	9	0	4.35	3.91	11.6	84.9	206	0.01	2.1	1.89	0.34	0.01	0.01	2.1	0.04	0.0321	28.5	7.942657885	2.3	-2.5	0.1	16.36	51.9	148.4	12.2	5.647840532	4.232804233	1.111111111
54	0	7	0	3	F	58	10	0	3.62	3.88	11.5	85.6	252	0	1.49	1.84	0.27	0.01	0.01	1.1	0.02	0.0361	28.4	7.0625	2	-2.3	0.4	17.80	51.6	144	17.4	5.976095618	8.695652174	0.809782609
55	0	7	0	4	F	58	11	0	3.4	3.73	10.9	85.5	286	0	1.3	1.73	0.3	0.05	0.02	2.3	0.04	0.041	30.7	5.138236828	2.1	0	0.4	14.70	49.3	144.5	15.6	3.663003663	8.092485549	0.751445087
56	0	7	0	5	F	58	12	0	3.33	3.75	10.9	85.1	314	0	1.19	1.71	0.35	0.07	0.01	2.3	0.04	0.0596	33.2	5.042630938	2.1	2.6	0.4	15.83	50	142.1	14.6	3.416149068	4.093567251	0.695906433
57	0	7	0	6	F	58	13	0	3.81	3.55	10.5	85.4	320	0.01	1.64	1.68	0.41	0.07	0.01	2.4	0.04	0.0735	34.2	3.996171333	2.1	3.6	0.6	12.79	49.6	142.6	13.7	1.072386059	2.380952381	0.976190476
58	0	8	1	1	F	39	4	0	3.22	4.7	14.6	86.2	158	0	1.35	1.58	0.28	0.01	0	0.6	0.01				1.8				46.5	155.8	8.9	0.877192982	1.265822785	0.85443038
59	0	9	1	0	M	74	10	0	6.97	4.44	13.7	89.9	225	0	5.27	0.5	1.09	0.06	0.05	14.0	0.07	0.0377	33.3	4.968110104	2.7	1.7	0.2	11.18	50.9	155.9	18	1.25	2	10.54
60	0	9	0	2	M	74	12	0	6.06	3.82	11.9	88.7	221	0								0.0354	31.1	3.077480087	3	-0.5	0.2	6.80
61	0	9	0	3	M	74	13	0	5.14	3.89	11.9	90.7	259	0	3.55	0.58	0.87	0.08	0.06	10.3	0.06	0.0401	30.1	2.97029703	2.5	-1.3	0.4	7.69	53	153.9	24.1	0.528401585	3.448275862	6.120689655
62	0	9	0	4	M	74	14	0	4.85	4.02	12.2	90.5	247	0	3.29	0.52	0.89	0.11	0.04	13.5	0.07	0.0398	31.4	3.982808023	2.6	-0.1	0.5	9.84	51.8	152.4	17.3	0.84643289	3.846153846	6.326923077
63	0	9	0	5	M	74	15	0	4.96	3.94	12.1	91.6	278	0	3.38	0.63	0.79	0.11	0.05	15.9	0.1	0.0493	31.8	2.571902655	2.2	0.5	0.6	7.15	53	150.3	23.8	1.843971631	4.761904762	5.365079365
64	0	9	0	7	M	74	17	0	5.1	4.09	12.5	90.7	300	0.01	3.13	0.78	1.01	0.12	0.06	15.4	0.12	0.0675	34.3	2.921348315	2.5	2.9	0.5	8.76	50.8	150.3	19.2	0.442477876	3.846153846	4.012820513
65	0	10	1	0	M	73	14	1	3.75	4.72	14	85.4	165	0	3.1	0.36	0.29	0	0	2.8	0.01	0.0271	26.9	12.43697479	2.4	-3.2	0.6	20.52	48.7	156.2	11.1	0.37593985	5.555555556	8.611111111
66	0	10	0	1	M	73	15	1	3.51	4.42	12.8	85.1	151	0	2.88	0.33	0.3	0	0	6.1	0.02	0.0247	27.6	10.65759637	2.6	-2.4	0.7	16.09	52.3	158.2	15.2	1.153846154	3.03030303	8.727272727
67	0	10	0	3	M	73	17	1	4.94	4.42	12.8	83.5	175	0.01	4.33	0.28	0.33	0	0	14.3	0.04	0.0248	27.4	9.034543844	3.2	-2.9	0.6	15.81	51.8	152.7		12.93706294	0	15.46428571
68	0	10	0	4	M	73	18	1	6.54	4.16	12.1	83.2	183	0	6.17	0.18	0.18	0	0.01	33.3	0.06	0.0216	26.2	6.991799741	3.7	-4.1	0.5	12.79	51.8	152.4	16.7	7.975460123	11.11111111	34.27777778
69	0	11	1	0	F	64	7	0	6.52	5.36	16.1	86.8	96	0	5.22	0.68	0.59	0.01	0.02	5.9	0.04	0.0481	31.7	3.6	2.5	0.6	0.1	4.70	56.8	150.6	2.9	3.682170543	0	7.676470588
70	0	11	0	1	F	64	8	0	3.92	4.38	13.2	87	113	0	2.29	1.1	0.53	0	0	1.8	0.02	0.0315	31.4	4.948586118	2.2	0.1	0.1	5.59	57	153.9	4.5	6.512605042	0	2.081818182
71	0	11	0	3	F	64	10	0	3.29	4.36	12.9	86.7	127	0	1.81	0.99	0.49	0	0	3.0	0.03	0.0323	31.2	5.422023477	2.2	0.1	0.2	6.89	56	152.9	6.1	2.721088435	2.02020202	1.828282828
72	0	12	1	0	M	62	8	1	5.33	4.93	12.7	75.5	164	0	4.74	0.32	0.26	0	0.01	6.3	0.02	0.0295	24.5	6.481481481	9.2	-2.1	1	10.63	47.5	145.9	9.4	0.840336134	0	14.8125
73	0	12	0	2	M	62	10	1	7.77	4.5	11.5	76.7	221	0	6.64	0.68	0.43	0.01	0.01	4.4	0.03	0.0297	23.6	3.027980069	7.7	-3.3	0.9	6.69	48.1	145.2	5.9	2.756892231	1.470588235	9.764705882
74	0	13	1	5	M	42	13	1	8.62	3.27	8.7	78.9	344	0.04	6.18	1.66	0.52	0.21	0.05	75.9	1.26				10				54.6	155.2	26.5	0.85106383	3.012048193	3.722891566
75	0	13	0	6	M	42	14	1	12.18	3.52	9.5	80.4	277	0.14	9.63	1.66	0.54	0.3	0.05	106.6	1.77	0.0317	29.5	7.954269034	8.5	2.1	0.5	22.03	54.4	155.3	29.5	1.03950104	2.409638554	5.801204819
76	0	13	0	7	M	42	15	1	13.32	3.5	9.5	81.1	293	0.18	10.69	1.74	0.58	0.21	0.1	108.0	1.88	0.0623	30.6	9.133316965	8.7	3	0.4	26.76	53.5	155.9	26.4	1.181102362	2.298850575	6.143678161
77	0	13	0	8	M	42	16	1	19.71	3.31	9	81.9	293	0.05	17.59	1.26	0.76	0.03	0.07	127.8	1.61	0.1089	31.9	10.75900843	8.4	3.9	0.2	31.52	50.3	157.9	23	0.448430493	1.587301587	13.96031746
78	0	13	0	9	M	42	17	1	18.09	3.26	8.7	82.2	297	0.06	16.1	1.36	0.55	0.02	0.06	99.3	1.35	0.1167	32.4	10.80277502	8	4.4	0.3	32.08	49.4	157.8	16.9	1.606425703	1.470588235	11.83823529
79	0	13	0	9	M	42	17	1	16.13	3.2	8.5	82.2	291	0.12	13.83	1.43	0.8	0.01	0.06	75.5	1.08	0.1392	31.5	8.748753739	8.2	3.5	0.2	25.46	47.9	159.4	18.2	0.961538462	2.097902098	9.671328671
80	0	13	0	10	M	42	18	1	14.19	3.1	8.4	82.6	288	0.11	11.89	1.51	0.75	0.01	0.03	62.9	0.95	0.1535	31.5	9.696233293	7.7	3.5	0.2	27.93	49.1	158.3	19.9	0.596125186	1.986754967	7.874172185
81	0	13	0	11	M	42	19	1	15.8	3.02	8.3	84.1	290	0.24	12.88	1.76	1.09	0.02	0.05	59.7	1.05	0.1863	31.2	9.740102016	7.5	3.4	0.2	28.25	46.7	159.7	15.3	0.206825233	1.704545455	7.318181818
82	0	13	0	12	M	42	20	1	16.83	3.06	8.4	84	302	0.49	13.25	2.17	1.29	0.07	0.05	63.1	1.37	0.2099	32.5	10.47862454	7.3	4.6	0.2	31.65	48.7	157.5	19.8	0.255536627	1.382488479	6.105990783
83	0	13	0	13	M	42	21	1	15.56	2.91	8	85.6	276	0.71	11.91	2.32	1.2	0.1	0.03	60.3	1.4	0.2002	33.3	10.09925558	5.9	5.6	0.3	27.87	47.2	156.7	20.3	0.729261623	1.724137931	5.13362069
84	0	14	1	1	M	34	1	0	6.54	6.18	16	78	214	0	3.24	1.38	1.87	0.02	0.03	1.4	0.02				8				49.2	157.6	10.1	0.725952813	0.724637681	2.347826087
85	0	15	1	13	M	63	5	1	13.05	3.97	11.4	88.7	469	0	8.9	1.76	1.69	0.52	0.18	46.0	0.81				2.3				51.4	159.3	9.7	0.324464633	2.272727273	5.056818182
86	0	15	0	14	M	63	6	1	15.25	3.98	11.3	88.4	466	0	11.26	1.63	1.95	0.3	0.11	31.9	0.52	0.0808	31.8	3.303471445	2.3	2.2	0.2	15.39	52.3	161.6	12.9	0.620417372	2.45398773	6.90797546
87	0	15	0	15	M	63	7	1	14.1	3.86	11.1	88.3	525	0	9.68	2.1	1.71	0.48	0.13	20.5	0.43	0.0749	31.3	2.083602951	2	1.9	0.3	10.94	51.4	160.1	9	0.325309044	1.904761905	4.60952381
88	0	15	0	16	M	63	8	1	15.04	4.14	11.8	87.7	534	0	10.78	1.9	1.79	0.4	0.17	14.2	0.27	0.0716	31.5	1.880068813	2	1.9	0.2	10.04	49.5	160.4	8.4	0.319897633	2.631578947	5.673684211
89	0	15	0	17	M	63	9	1	14.49	4.09	11.5	88	564	0	9.77	2.26	1.62	0.67	0.17	18.6	0.42	0.0855	32.5	1.340909091	2	2.8	0.1	7.56	50.3	160.3	11.1	0.622406639	3.097345133	4.32300885
90	0	15	0	18	M	63	10	1	13.53	4.1	11.8	87.6	569	0	9.51	2.01	1.38	0.51	0.12	11.9	0.24	0.0816	32.3	0.990471414	2.1	2.6	0.1	5.64	47.3	159.5	9.5	0.397772474	2.985074627	4.731343284
91	0	15	0	19	M	63	11	1	13.58	4.24	12.2	88.9	558	0	8.72	2.51	1.38	0.83	0.14	11.2	0.28	0.0992	31.5	1.826709454	1.9	2	0.2	10.19	49.1	156.9	10	0.410846343	1.992031873	3.474103586
92	0	15	0	20	M	63	12	1	13.45	4.51	13.1	89.8	580	0	9.14	2.29	1.24	0.68	0.1	7.0	0.16	0.092	31.1	1.220838873	1.7	1.7	0.2	7.08	46.6	158.4	5.7	0.265721878	1.746724891	3.991266376
93	0	16	1	11	M	80	14	1	6.62	3.23	9.2	91.3	234	0	3.97	1.02	1.58	0.03	0.02	46.1	0.47				1.6				40.1	136	18.6	5.374823197	2.941176471	3.892156863
94	0	16	0	12	M	80	15	1	6.78	3.11	8.9	90.7	244	0.01	4.31	0.85	1.54	0.06	0.02	65.9	0.56	0.0759	23.5	6.998577525	1.9	-5.5	1.2	17.08	40.3	138.7	22.4	3.104693141	4.705882353	5.070588235
95	0	16	0	13	M	80	16	1	7.9	3.09	8.9	94.5	214	0	6.02	0.42	1.42	0.03	0.01	173.8	0.73	0.0834	24.3	5.303760849	1.3	-4	1.9	11.35	41.9	138.2	35.7	1.309707242	11.9047619	14.33333333
96	0	16	0	14	M	80	17	1	8.04	3.07	8.7	92.5	233	0.01	5.53	0.72	1.7	0.06	0.03	79.2	0.57	0.0872	28.2	5.332114564	1.8	-0.4	1.3	12.42	43.5	140.2	37.5	2.19123506	8.333333333	7.680555556
97	0	16	0	15	M	80	18	1	8.11	3.12	9.1	93.6	249	0	4.8	1.24	1.97	0.08	0.02	47.6	0.59	0.1098	29	4.921205419	1.7	0.5	1.6	12.25	40.9	141	27.4	1.07587769	7.258064516	3.870967742
98	0	16	0	16	M	80	19	1	9.4	3.16	9	92.7	248	0.02	5.82	1.56	1.92	0.07	0.03	51.3	0.8	0.1179	29	5.494830133	2	0.7	2.2	13.63	43.2	143.6	36.5	2.731929425	12.82051282	3.730769231
99	0	16	0	17	M	80	20	1	16.02	3.31	9.5	91.2	274	0.03	12.58	1.47	1.88	0.03	0.06	106.8	1.57	0.137	29.2	7.199576496	2.4	0.7	1.8	19.73	44.5	144.3	35.4	3.115638107	16.32653061	8.557823129
100	0	16	0	18	M	80	21	1	12.19	3.11	9.1	92.3	230	0.01	10.2	0.81	1.15	0	0.03	134.6	1.09	0.1353	28.5	6.172069825	2.2	-0.2	1.5	14.20	43	146.4	22.2	1.076320939	7.407407407	12.59259259
101	0	16	0	19	M	80	22	1	11.86	3.03	8.7	95	258	0.02	10.1	0.7	1.03	0	0.03	167.1	1.17	0.1373	29.3	6.262510723	1.6	0.6	1.5	16.16	42.9	144.6	22.9	0.961538462	5.714285714	14.42857143
102	0	17	1	1	F	68	10	0	3.34	5.37	13.8	78.4	192	0.01								0.0242	29.3	6.377858002	6.2	2.4	0.2	12.25
103	0	17	0	2	F	68	11	0	4.21	5.11	13	78.3	203	0	2.26	1.41	0.51	0.01	0.02	0.7	0.01	0.023	29.4	4.04112017	6.8	2.5	0.4	8.20	47.3	144.3	10.6	0.873362445	2.127659574	1.602836879
104	0	17	0	4	F	68	13	0	4.42	5.18	13.1	77.8	266	0	2.33	1.48	0.49	0.09	0.03	0.7	0.01	0.028	28	4.315937941	6.9	1	0.5	11.48	45.8	142.3	12.2	0.947867299	2.702702703	1.574324324
105	0	18	1	0	M	78	14	1	13.1	4.8	14.2	84	213	0	12.21	0.54	0.31	0	0.04	29.6	0.16	0.0196	30.8	6.522563519	2.6	-0.1	0.3	13.89	56.1	159.2	11.1	2.826855124	3.703703704	22.61111111
106	0	18	0	2	M	78	16	1	10.65	4.68	14	87.6	174	0	9.59	0.79	0.24	0	0.03	5.1	0.04	0.0211	31	3.1	1.9	0.1	0.3	5.40	55.2	154.9	5.1	10.17699115	1.265822785	12.13924051
107	0	18	0	2	M	78	16	1	9.41	4.44	13	85.1	205	0	8.56	0.58	0.12	0.12	0.03	17.2	0.1	0.0213	28.9	3.679175865	2.7	-1.8	1.1	7.54	61.7	156	6.9	23.80952381	3.448275862	14.75862069
108	0	18	0	3	M	78	17	1	9.61	4.54	13.4	84.8	216	0	8.59	0.57	0.26	0.13	0.06	14.0	0.08	0.0245	30.2	5.612572162	3.1	-0.5	0.7	12.12	63	152.9	22.8	17.79661017	10.52631579	15.07017544
109	0	18	0	4	M	78	18	1	9.92	4.35	12.6	85.7	231	0.01	8.74	0.67	0.25	0.2	0.06	19.4	0.13	0.0204	28.8	4.423963134	2.9	-1.8	1	10.22	60.1	151.6	19.4	19.2139738	7.462686567	13.04477612
110	0	19	1	0	M	88	7	1	6.94	4.2	12.5	87.9	117	0	5.06	1.44	0.43	0	0.01	4.2	0.06	0.0267	31.2	14.6	2.4	0.2	0.4	19.60	49.3	146.1	5.6	5.333333333	2.777777778	3.513888889
111	0	19	0	1	M	88	8	1	9.83	4.37	13.1	87	152	0	7.95	1.39	0.48	0	0.01	7.9	0.11	0.0192	32	13.10483871	2.8	0.9	0.3	19.92	50	148.6	5.8	3.240740741	2.877697842	5.71942446
112	0	19	0	3	M	88	10	1	12.75	3.71	11.1	88.1	197	0	10.41	1.57	0.73	0.02	0.02	8.3	0.13	0.0208	31	12.80788177	2.7	0	0.4	25.23	52.2	148.2	5.7	4.813664596	3.184713376	6.630573248
113	0	20	1	0	M	58	3	0	5.42	4.86	14.1	81.7	241	0	4.25	0.94	0.22	0	0.01	3.2	0.03	0.0432	29.4	5.003248863	3.7	-1	0.1	12.06	52.4	153.9	9.6	4.081632653	2.127659574	4.521276596
114	0	20	0	1	M	58	4	0	5.79	4.69	13.5	82.7	251	0	4.12	1.41	0.25	0	0.01	2.1	0.03	0.0385	29.1	4.349247874	3.5	-1.2	0.1	10.92	57.3	152.3	11.3	14.66666667	1.418439716	2.921985816
115	0	20	0	3	M	58	6	0	6.34	4.45	12.5	81.8	303	0	4.88	1.12	0.32	0.01	0.01	1.8	0.02	0.0312	29.5	3.380070105	3.5	-0.7	0.1	10.24	53.3	150.9	13.4	4.467353952	2.678571429	4.357142857
116	0	21	1	0	M	67	3	1	10.61	4.83	14.2	85.7	175	0	9.49	0.82	0.28	0.01	0.01	14.6	0.12				3.1				52.3	157		14.93775934	1.219512195	11.57317073
117	0	22	1	0	F	63	3	0	5.69	4.44	13.5	86.7	202	0	3.9	1.13	0.62	0.01	0.03	1.8	0.02				2				54.9	164.4	7.1	1.750972763	0.884955752	3.451327434
118	0	23	1	0	M	69	7	0	6.23	5.02	13.6	78.1	171	0	5.5	0.45	0.27	0	0.01	4.4	0.02				7.4				47.9	151.3	11.1	2.083333333	6.666666667	12.22222222
119	0	24	1	0	F	62	5	0	3.76	4.72	13.2	83.3	161	0	2.53	0.96	0.25	0.01	0.01	1.0	0.01				4.9				51.8	152	11.5	5.829596413	2.083333333	2.635416667
120	0	25	1	0	M	81	1	1	4.3	3.64	12.3	99.5	139	0.01	3.72	0.43	0.14	0	0.01	14.0	0.06				2.1				61.3	157.8		31.74603175	2.325581395	8.651162791
121	0	26	1	0	M	60	7	0	9.47	5	15	86.2	254	0	8.32	0.64	0.51	0	0	9.4	0.06				1.8				49.6	155.8	6.3	0.892857143	3.125	13
122	0	27	1	0	F	70	5	0	25.69	4.59	14.4	97.2	246	0.13	21.95	1.8	1.79	0.01	0.14	14.4	0.26				1.3				50.3	150.5	10	0.319693095	1.111111111	12.19444444
123	0	28	1	0	M	58	12	0	7.65	4.6	13.8	87.8	247	0	5.14	1.68	0.83	0	0	1.2	0.02				1.9				48.9	157.2	2.4	1.285714286	0.595238095	3.05952381
124	0	29	1	0	F	49	9	0	4.48	4.43	13.6	86.9	187	0.01	3.4	0.89	0.18	0	0.01	4.5	0.04				1.5				52.4	156.4	13.5	8.783783784	6.741573034	3.820224719
125	0	30	1	0	M	67	3	1	8.16	5.32	16	86.7	175	0											2.6
126	0	30	0	4	M	67	7	1	8.34	4.63	13.9	97.2	203	0	6.97	0.86	0.5	0	0.01	5.8	0.05				0.7				51.8	144.2	9.3	15.45253863	1.162790698	8.104651163
127	0	31	1	0	M	62	15	0	5.7	4.66	15	93.8	401	0	5	0.51	0.18	0	0.01	5.9	0.03				0.6				51.5	146.4		8.928571429	17.64705882	9.803921569
128	0	32	1	0	M	80	10	1	3.37	5.68	14	77.6	133	0	2.85	0.26	0.26	0	0	3.8	0.01				10.3				54.9	155	19.2	7.916666667	3.846153846	10.96153846
129	0	33	1	0	M	78	3	1	3.61	3.57	11.6	93.3	169	0	2.45	0.72	0.43	0	0.01	2.8	0.02				0.6				50.3	155.7	5.6	1.089918256	1.388888889	3.402777778
130	0	34	1	0	M	71	6	1	7.55	4.54	13.3	89.4	241	0											1.7
131	0	35	1	0	F	47	7	0	4.44	5.08	14.3	82.5	231	0.01	2.72	1.27	0.44	0.01	0	1.6	0.02				3.1				54.1	153.8	15	4.594594595	3.149606299	2.141732283
132	0	36	1	0	M	52	1	1	13.34	3.85	12.1	98.2	320	0.02	8.98	3.81	0.36	0.15	0.04	14.4	0.55	0.0628	32.8	1.4	0.5	1.1	0.1	4.50	54.9	153.2	10	0.943396226	0.787401575	2.356955381
133	0	37	1	0	M	73	7	0	7.01	5.39	15.6	88.1	175	0	5.8	0.44	0.68	0.07	0.02	4.5	0.02				1.7				46.4	154	9.1	0	2.272727273	13.18181818
134	0	38	1	0	F	74	10	1	5.28	4.74	13.5	86.5	170	0	4.36	0.69	0.23	0	0	2.9	0.02				1.5				53.3	157.3		28.84615385	4.347826087	6.31884058
135	0	39	1	0	M	58	11	0	7.36	5.21	15.5	86.4	274	0	5.66	0.92	0.76	0.01	0.01	8.7	0.08				2.5				54.1	152.7	16.3	4.668674699	8.695652174	6.152173913
136	0	40	1	0	M	74	3	0	7.96	5.72	17.7	87.8	152	0	5.41	1.78	0.75	0	0.02	1.7	0.03				2				43.1	156	3.9	1.166180758	1.123595506	3.039325843
137	0	41	1	0	M	72	3	0	3.96	3.94	11.9	86.3	199	0	1.72	1.28	0.92	0.01	0.03	3.1	0.04				2.5				46.4	154.7	12.5	0.833333333	2.34375	1.34375
138	0	42	1	0	M	35	2	0	6.63	5.33	14.8	79.2	163	0	4.1	2.04	0.47	0	0.02	2.5	0.05				5.2				55.3	156.5	5.4	2.985074627	1.960784314	2.009803922
139	0	43	1	0	M	75	7	0	7.74	4.58	13.7	86.9	204	0.01	5.52	1.62	0.54	0.04	0.02	4.3	0.07				2.4				54.8	159.1		13.63636364	4.938271605	3.407407407
140	0	44	1	0	M	91	3	0	5.65	3.8	11.6	86.6	104	0	4.65	0.4	0.59	0	0.01	10.0	0.04				2				47.3	161.1	5	1.744186047	0	11.625
141	0	45	1	0	M	68	7	1	20.69	4.51	12.7	81.4	384	0.02	19	0.83	0.77	0.02	0.07	33.7	0.28				5.2				49.8	146	31.3	3.757225434	22.89156627	22.89156627
142	0	45	0	1	M	68	8	1	23.5	4.73	13	82.5	353	0.01											4.7
143	0	45	0	1	M	68	8	1	23.18	4.57	12.6	84.7	373	0											3.7
144	0	45	0	2	M	68	9	1	19.72	4.15	11.4	86.5	355	0.02	18.69	0.52	0.26	0.21	0.04	67.3	0.35				2.5				48.6	144.6	21.2	3.636363636	9.615384615	35.94230769
145	0	45	0	3	M	68	10	1	19.88	4.08	11.3	86.3	239	0.01											2.7
146	0	45	0	4	M	68	11	1	30.48	3.99	11.2	88.2	220	0	28.42	0.86	0.64	0.33	0.23	179.1	1.54				2.9				53	149	20.9	8.409506399	6.976744186	33.04651163
147	0	45	0	5	M	68	12	1	25.41	2.84	8	85.9	283	0.01	22.64	1.25	0.82	0.58	0.12	131.2	1.64				3.5				50.3	149.6	16.8	2.106741573	4	18.112
148	0	45	0	5	M	68	12	1	22.71	2.73	7.7	86.1	332	0											3.8
149	0	45	0	6	M	68	13	1	19.43	2.84	8.1	86.3	314	0.01	16.81	1.14	0.84	0.54	0.1	163.2	1.86				3.5				48.8	149.3	13.2	0.777202073	3.50877193	14.74561404
150	0	45	0	6	M	68	13	1	17.23	3.09	8.6	84.8	326	0.01											4.2
151	0	45	0	7	M	68	14	1	16.59	3.05	8.7	85.2	366	0.01	14.46	0.83	0.83	0.35	0.12	186.7	1.55				4				51.9	149.6	21.7	2.141900937	3.614457831	17.42168675
152	0	45	0	7	M	68	14	1	18.4	3.18	9.1	85.8	447	0.01											3.8
153	0	45	0	8	M	68	15	1	18.76	3.16	9	87.3	483	0	16.71	0.74	1	0.25	0.06	143.2	1.06				2.8				52	149.6	23	1.44766147	5.405405405	22.58108108
154	0	45	0	9	M	68	16	1	22.12	3.42	9.8	87.4	594	0	19.89	0.76	1.07	0.3	0.1	85.5	0.65				3.4				50.5	151.8	25	1.397849462	6.578947368	26.17105263
155	0	45	0	10	M	68	17	1	21.6	3.35	9.5	89	630	0	19.24	0.82	1.1	0.36	0.08	37.8	0.31				2.8				50.9	151	24.4	1.042752868	7.317073171	23.46341463
156	0	45	0	11	M	68	18	1	20.71	3.25	9.1	89.8	588	0	18.21	0.98	1.01	0.46	0.05	24.5	0.24				2.8				50.5	149.9	20.4	1.352874859	7.142857143	18.58163265
157	0	45	0	12	M	68	19	1	17.21	2.94	8.4	89.8	464	0	14.84	1.08	0.85	0.4	0.04	16.7	0.18				2.9				50.2	150.6	20.4	1.449275362	7.407407407	13.74074074
158	0	45	0	13	M	68	20	1	13.69	3.17	9.3	87.4	406	0	10.79	1.5	0.74	0.6	0.06	14.0	0.21				4.2				53.6	152.3	27.3	3.250773994	8	7.193333333
159	0	45	0	14	M	68	21	1	16.18	3.44	9.8	85.2	442	0	13.53	1.47	0.83	0.32	0.03	19.7	0.29				4.7				55.7	153.5	32	3.547066849	8.843537415	9.204081633
160	0	45	0	15	M	68	22	1	15.79	3.13	9.1	86.3	344	0	12.82	1.51	0.75	0.66	0.05	10.6	0.16				4.2				52.9	150.8	19.9	1.53609831	5.298013245	8.490066225
161	0	45	0	16	M	68	23	1	12.91	3.12	9.2	86.9	333	0	9.91	1.44	0.67	0.85	0.04	10.4	0.15				4.2				50.1	151.3	16	1.215277778	5.555555556	6.881944444
162	0	45	0	17	M	68	24	1	11.27	3.2	9	85.9	303	0.01	8.2	1.33	0.72	0.98	0.04	14.3	0.19				4.4				48.9	152.3	16.5	1.444622793	6.015037594	6.165413534
163	0	45	0	18	M	68	25	1	10.89	3.08	8.5	87	290	0	7.8	1.52	0.71	0.83	0.03	11.2	0.17				3.4				52.3	152.5	17.8	0.621118012	3.947368421	5.131578947
164	0	45	0	19	M	68	26	1	12.13	3.08	8.7	83.8	284	0	9.07	1.41	0.78	0.83	0.04	11.3	0.16				5				51	155.1	17	1.5625	4.255319149	6.432624113
165	0	45	0	20	M	68	27	1	12.34	3.3	9.3	84.2	310	0.01	8.51	1.62	0.97	1.19	0.05	8.6	0.14				4.7				49.5	155.3	14.2	0.924855491	3.703703704	5.25308642
166	0	45	0	21	M	68	28	1	9.7	3.27	9.1	84.7	327	0	6.47	1.67	0.76	0.75	0.05	6.0	0.1				4.4				48.4	154.5	16.8	1.323529412	4.191616766	3.874251497
167	0	45	0	22	M	68	29	1	8.55	3.55	9.8	86.2	215	0	5.43	1.65	0.75	0.67	0.05	4.8	0.08				3.9				49.7	158.2	22.4	1.386748844	4.242424242	3.290909091
168	0	46	1	0	F	75	10	0	5.92	3.88	11.8	90.2	266	0	4.08	0.92	0.87	0.03	0.02	6.5	0.06				1.5				47.7	154	10.9	1.020408163	2.173913043	4.434782609
169	0	47	1	0	M	73	4	0	11.8	4.4	12.7	86.1	176	0	9.27	2.07	0.43	0	0.03	4.8	0.1				3.3				55	150.4	5.8	5.555555556	1.449275362	4.47826087
170	0	48	1	0	F	74	10	1	3.23	4.32	12.2	86.8	190	0	2.46	0.38	0.39	0	0	2.6	0.01				2				53.9	146.5	18.4	1.680672269	5.263157895	6.473684211
171	0	49	1	0	M	82	10	1	6.26	4.22	13.1	91.9	195	0											1
172	0	50	1	0	M	75	3	0	5.11	4.7	14	85.7	143	0	3.27	1.13	0.7	0	0.01	0.9	0.01				2.1				53	160.3	2.7	4.777070064	0	2.89380531
173	0	51	1	0	M	63	7	0	6.38	4.91	14.8	88	157	0	5.04	1	0.33	0	0.01	4.0	0.04				1.5				55.9	161.7	13	10.76388889	5	5.04
174	0	52	1	0	F	74	5	1	7.41	3.18	10.9	108.8	234	0.01	5.56	1.24	0.6	0	0.01	4.0	0.05				0.3				51.9	148.8		4.150943396	0	4.483870968
175	0	53	1	0	M	64	3	1	7.75	5.29	16	85.1	180	0	6.78	0.36	0.59	0	0.02	11.1	0.04				2.3				53.6	155.5		22.67657993	0	18.83333333
176	0	54	1	0	F	83	2	1	7.34	5.12	15.2	85.9	178	0	5.97	0.8	0.55	0	0.02	8.8	0.07				1.8				50.9	161.3	16.3	4.938271605	5	7.4625
177	0	54	0	4	F	83	6	1	7.22	4.66	14.2	85.8	199	0	6.05	0.69	0.43	0.02	0.03	11.6	0.08				1.6				47.6	151.4	14.5	2.925531915	8.695652174	8.768115942
178	0	54	0	10	F	83	12	1	10.66	3.92	11.6	86	322	0	9.44	0.58	0.52	0.07	0.05	39.7	0.23				2.2				49.8	148.6	24.1	1.290322581	12.06896552	16.27586207
179	0	54	0	11	F	83	13	1	17.14	4.47	13.3	89.7	425	0	15.55	0.61	0.82	0.07	0.09	70.5	0.43				1.4				51.1	148.2	23	1.069518717	6.557377049	25.49180328
180	0	55	1	0	M	70	5	0	5.5	5.58	17.9	89.2	134	0	2.57	2.06	0.79	0.04	0.04	2.4	0.05				1.2				47.4	156.3	9.7	0.574712644	1.941747573	1.247572816
181	0	56	1	0	M	67	3	1	7.45	5.23	16.1	84.5	153	0	6.14	0.86	0.43	0	0.02	11.6	0.1				3.1				51.8	156.2	14	7.772020725	10.46511628	7.139534884
182	0	57	1	0	F	71	7	0	8.25	4.57	13.6	88.4	265	0	6.52	1.18	0.53	0	0.02	4.2	0.05				1.7				53.1	159.7	5.9	6.823027719	0	5.525423729
183	0	58	1	0	M	81	3	0	4.34	4.2	13.1	87.4	58	0	3.54	0.5	0.3	0	0	4.0	0.02				2				52.8	156.4	8	0	2	7.08
184	0	59	1	0	F	66	7	0	4.26	4.7	13	80.9	179	0	2.67	1.27	0.3	0.01	0.01	1.6	0.02				5.7				52	160.8	5.5	2.298850575	1.57480315	2.102362205
185	0	60	1	0	F	82	10	0	7.02	4.81	13.5	79.4	278	0	6.07	0.62	0.29	0.02	0.02	14.5	0.09				5.5				46.1	150.6	11.3	1.612903226	4.838709677	9.790322581
186	0	61	1	0	M	87	6	0	7.37	4.1	13.9	94.1	172	0	5.55	1.39	0.4	0	0.03	3.6	0.05				1				52.8	155.2	10.1	10.52631579	7.194244604	3.992805755
187	0	62	1	0	M	83	3	1	6.29	5.6	16.5	85.9	399	0	5.02	0.77	0.46	0.01	0.03	6.5	0.05				3.4				51.3	147.5	13	3.341902314	3.896103896	6.519480519
188	0	63	1	0	M	68	10	0	6.59	5.72	11.6	60.8	189	0	5.15	1.12	0.32	0	0	2.7	0.03			7.9	60.2			14.90	49.7	154.4	8	5.633802817	4.464285714	4.598214286
189	0	64	1	0	F	25	4	0	4.49	4.54	13.1	85.9	202	0	2.28	1.82	0.37	0	0.02	0.0	0				1.9				49.8	158.8	7.7	0.628930818	1.098901099	1.252747253
190	0	65	1	0	M	65	5	0	3.75	4.94	14.3	86.4	84	0											2.6
191	0	66	1	0	M	73	7	1	12.91	5.05	13.9	81.6	205	0	11.03	0.64	1.19	0	0.05	7.8	0.05				4.3				48.8	152.1	20.3	0.568181818	1.5625	17.234375
192	0	67	1	0	M	58	8	0	8.39	4.42	13.6	85.5	354	0.01											2
193	0	68	1	0	M	73	7	0	5.7	4.56	9.7	71.3	100	0	5.17	0.33	0.18	0.01	0.01	12.1	0.04				30				52.4	152.9		17.94871795	6.060606061	15.66666667
194	0	69	1	0	F	69	3	0	4.55	3.91	12.1	87.7	176	0	2.27	1.82	0.42	0.02	0.02	1.1	0.02				1.2				48	152.7	11.5	1.966292135	3.846153846	1.247252747
195	0	70	1	0	M	57	5	0	1.03	3.44	12.2	98.8	94	0	0.5	0.4	0.12	0	0.01	2.5	0.01				0.6				50.7	142.7	15	9.523809524	2.5	1.25
196	0	71	1	0	M	77	7	0	4.53	4.75	15.3	90.9	183	0	3.08	0.88	0.56	0	0.01	4.5	0.04				1.2				50.1	157.4	6.8	1.446280992	2.272727273	3.5
197	0	72	1	0	M	60	3	0	7.99	5.02	15.6	88.6	178	0	6.24	1.2	0.54	0	0.01	1.7	0.02				1.2				57.4	157.3	5	2.226720648	1.666666667	5.2
198	0	73	1	0	M	36	10	0	7.48	5.32	14.9	85.9	218	0	5.81	1.24	0.42	0	0.01	2.4	0.03				1.8				53.2	155.9	13.7	3.260869565	3.225806452	4.685483871
199	0	74	1	0	F	72	10	0	3.54	4.43	13.1	86.5	222	0	2.01	0.94	0.56	0.01	0.02	5.3	0.05				2.3				54.6	152.1		1.581027668	3.191489362	2.138297872
200	0	75	1	0	M	58	5	0	5.9	4.57	14.1	88.6	191	0	4.1	1.6	0.19	0	0.01	0.6	0.01				1.4				49.8	154.8	6.3	1.840490798	2.5	2.5625
201	0	76	1	0	M	42	0	0	2.99	4.7	14.7	87.7	100	0											1.3
202	0	77	1	0	F	90	4	0	4.33	4.35	13.4	90.3	135	0	3.1	0.79	0.41	0.01	0.02	3.8	0.03				1.2				53	158.7	10.1	1.146131805	1.265822785	3.924050633
203	0	78	1	0	F	77	15	1	5.59	4.77	14.2	85.1	159	0	4.7	0.55	0.33	0	0.01	9.1	0.05				1.7				48	150.4	14.5	3.947368421	9.090909091	8.545454545
204	0	79	1	0	M	52	1	0	6.21	4.29	12.1	88.3	170	0	4.02	1.48	0.61	0.09	0.01	2.0	0.03				2.7				49.8	151.9	17.6	1.28440367	1.351351351	2.716216216
205	0	79	0	0	M	52	1	0	5.58	3.97	11.2	88.7	154	0											2.9
206	0	79	0	1	M	52	2	0	5.43	4.29	12.2	89.5	158	0											2.3
207	0	79	0	2	M	52	3	0	4.85	4.11	11.6	89.5	135	0											2.3
208	0	79	0	3	M	52	4	0	4.52	4.23	11.9	87.9	116	0	2.71	1.33	0.43	0.04	0.01	2.3	0.03				2.8				51.1	155	9.8	2.666666667	1.503759398	2.037593985
209	0	79	0	5	M	52	6	0	4.71	3.98	11.3	88.2	121	0	2.89	1.34	0.41	0.06	0.01	1.5	0.02				2.8				50.1	152.7		1.907356948	0.746268657	2.156716418
210	0	79	0	7	M	52	8	0	4.81	3.42	9.7	90.1	123	0											2.3
211	0	79	0	8	M	52	9	0	4.46	3.84	10.8	87.2	150	0	2.78	1.16	0.39	0.13	0	1.7	0.02				3				49.6	150.8	10.3	2.395209581	2.586206897	2.396551724
212	0	79	0	9	M	52	10	0	5.55	4.23	11.8	89.4	197	0											2.4
213	0	79	0	10	M	52	11	0	7.59	4.16	11.6	89.2	230	0	5.05	1.9	0.42	0.21	0.01	3.2	0.06				2.5				51.9	147.8	9.5	2.203856749	1.052631579	2.657894737
214	0	79	0	12	M	52	14	0	9.58	4.57	12.9	88.4	299	0	6.87	1.86	0.58	0.25	0.02	5.9	0.11				2.9				48.3	147.2	7.5	0.573613767	1.075268817	3.693548387
215	0	80	1	0	M	59	6	0	5.76	5.27	15.3	82.5	180	0	4.25	0.98	0.51	0	0.02	2.0	0.02				3.6				48.7	150.8	10.2	2.045454545	6.12244898	4.336734694
216	0	81	1	0	M	73	15	1	3.67	4.93	15.4	90.5	140	0	2.7	0.62	0.33	0	0.02	3.2	0.02				1.6				47.5	161.4	3.2	0.348432056	0	4.35483871
217	0	82	1	0	M	57	7	0	8.44	5.27	15.5	86.9	260	0	7.09	0.64	0.6	0.06	0.05	18.8	0.12				2.6				52	164.6	14.1	5.009276438	6.25	11.078125
218	0	83	1	0	M	37	2	0	6.01	5.23	14.6	81.1	199	0	4.51	0.9	0.48	0.08	0.04	3.3	0.03				4				52.7	159.8	13.3	0.469483568	1.111111111	5.011111111
220	0	85	1	0	M	32	1	1	3.62	3.69	12.8	97	79	0.01	3.27	0.1	0.19	0	0.06	10.0	0.01				0.5				53.1	158.4	10	1.863354037	0	32.7
221	0	86	1	0	F	86	15	1	6.09	4.23	13	92.4	279	0	5	0.79	0.29	0	0.01	16.5	0.13				1				52.9	154.6	12.7	9.454545455	5.063291139	6.329113924
222	0	87	1	0	M	55	3	0	4.19	5.01	14.4	82.6	158	0	2.62	1.16	0.39	0.01	0.01	1.7	0.02				3.2				53.5	153.5	7.8	1.807228916	1.724137931	2.25862069
223	0	88	1	0	M	62	7	0	5.81	4.34	13.8	91.7	166	0	3.54	1.85	0.4	0	0.02	2.7	0.05				0.8				52.6	161.9		6.741573034	1.621621622	1.913513514
225	0	90	1	0	F	92	3	0	10.74	5.32	16.3	85	177	0	9.54	0.95	0.24	0	0.01	5.3	0.05				3.1				52.7	162.3		19.71153846	0	10.04210526
226	0	91	1	0	F	54	3	0	4.91	5.02	15.7	85.3	106	0	3.73	0.59	0.57	0	0.02	5.1	0.03				1.6				50	155	18.6	4.911591356	15.25423729	6.322033898
227	0	92	1	0	M	68	7	0	4.26	5.12	15.3	85.7	150	0	3.2	0.66	0.39	0	0.01	3.0	0.02				2.1				52.2	163.1	12.1	1.775147929	3.03030303	4.848484848
228	0	93	1	0	M	71	9	1	9.33	4.19	13.4	88.5	159	0	8.57	0.46	0.29	0	0.01	13.0	0.06				1.2				51.1	152.8	10.9	2.766798419	6.52173913	18.63043478
229	0	93	0	1	M	71	0	1	5.37	3.83	11.7	89.6	157	0											1
230	0	93	0	2	M	71	0	1	9.41	4.34	13.6	93.3	233	0	8.29	0.68	0.43	0	0.01	16.2	0.11				0.8				54.3	148.7	20.6	4.787234043	13.23529412	12.19117647
231	0	94	1	0	F	66	4	0	5.92	4.16	12.6	86.5	212	0	4.17	1.25	0.49	0	0.01	2.4	0.03				1.9				48.8	163.6	7.2	0.928074246	3.2	3.336
232	0	95	1	0	M	82	10	0	7.74	5.56	17.4	87.6	111	0	5.32	1.92	0.49	0	0.01	3.1	0.06				1.7				54	157.3		13.54401806	5.729166667	2.770833333
233	0	96	1	0	M	89	7	1	5.01	3.73	9.7	78.8	168	0	4.21	0.37	0.43	0	0	8.1	0.03				6.2				52.8	145	5.4	2.290076336	2.702702703	11.37837838
234	0	97	1	0	M	62	10	0	8.52	4.54	12.6	78.2	168	0	7.63	0.6	0.28	0	0.01	8.3	0.05				7.1				53.8	153.2	6.7	2.834008097	3.333333333	12.71666667
235	0	98	1	0	F	78	10	0	5.06	4.55	13	86.4	157	0	3.88	0.89	0.28	0	0.01	5.6	0.05				2.5				52.3	160.9		10.62992126	3.370786517	4.359550562
236	0	98	0	2	F	78	12	0	6.01	4.65	13.8	85.8	178	0.01	4.66	1.07	0.24	0.01	0.03	4.7	0.05				2.9				51	155.6	12.1	8.695652174	5.607476636	4.355140187
237	0	98	0	4	F	78	14	0	4.98	4.37	12.6	83.8	207	0											3
238	0	98	0	5	F	78	15	0	5.55	4.25	12.2	87.1	245	0											2
239	0	98	0	13	F	78	23	0	5.44	4.45	13.2	89.4	281	0	3.16	1.57	0.54	0.12	0.05	1.9	0.03				1.7				48.8	159.6	14.6	1.489361702	1.910828025	2.012738854
240	0	99	1	0	M	83	4	1	10.15	4.48	15.3	97.1	186	0	8.24	1.3	0.59	0	0.02	3.8	0.05				0.6				48.2	158.3	9.2	2.264150943	3.846153846	6.338461538
241	0	99	0	1	M	83	5	1	9.63	4.04	14	98.8	166	0	7.55	1.51	0.53	0.01	0.03	4.6	0.07				0.5				50.5	157.5	7.9	2.608695652	1.986754967	5
242	0	99	0	2	M	83	6	1	9.48	3.78	12.8	99.5	147	0.01											0.3
243	0	99	0	3	M	83	7	1	12.63	3.81	12.9	99	149	0											0.5
244	0	99	0	4	M	83	8	1	17.84	3.53	12.5	103.1	142	0											0.5
245	0	99	0	5	M	83	9	1	20.1	3.63	12.6	100	133	0											0.5
246	0	100	1	0	M	80	4	1	5.41	3.95	11.9	88.9	254	0	4.14	0.73	0.54	0	0	11.0	0.08				1.6				55.2	147.6	12.3	6.557377049	2.739726027	5.671232877
247	0	101	1	0	M	87	0	1	4.82	4.48	13.4	89.5	226	0	3.67	0.8	0.35	0	0	2.5	0.02				1.2				52.6	162.6	13.8	5.538461538	5	4.5875
248	0	102	1	0	M	58	10	0	7.6	5.69	15.4	78.6	188	0	7.17	0.31	0.12	0	0	51.6	0.16				6.4				56	152.3	16.1	21.4953271	9.677419355	23.12903226
249	0	103	1	0	M	67	7	1	3.23	5.66	15	81.4	172	0.01	2.84	0.27	0.11	0	0.01	11.1	0.03				6.8				52.4	147.1	11.1	8.653846154	3.703703704	10.51851852
250	0	103	0	1	M	67	8	1	4.93	5.33	14.6	81.8	168	0.01	4.33	0.45	0.14	0	0.01	13.3	0.06				6.6				51.7	144	4.4	5.785123967	2.222222222	9.622222222
251	0	104	1	0	M	72	15	1	6.3	6.28	19.2	87.3	137	0	5.32	0.74	0.23	0	0.01	8.1	0.06				1.8				47.6	145.7	13.5	16.17647059	8.108108108	7.189189189
252	0	105	1	0	F	39	12	0	10.21	4.27	13	89.2	263	0	9.03	0.87	0.29	0	0.02	10.3	0.09				1.1				53.8	151.6		22.76422764	8.045977011	10.37931034
253	0	106	1	0	M	85	7	1	4.1	4.7	14.1	82.6	82	0	3.38	0.42	0.29	0	0.01	4.8	0.02			8.7	4.2			7.10	52.6	162		14.51612903	2.380952381	8.047619048
254	0	107	1	0	F	40	3	0	7.26	4.82	13.2	82	121	0	6	0.63	0.62	0	0.01	4.8	0.03				6.5				53.1	153.2	4.8	3.094777563	0	9.523809524
255	0	108	1	0	M	69	10	0	5.2	5.01	15.1	85.4	215	0	3.75	1.01	0.41	0.01	0.02	2.0	0.02				2.2				47.1	154	9.9	1.675977654	2.97029703	3.712871287
256	0	109	1	0	M	71	6	1	4.71	5.38	17.3	88.8	125	0	3.32	0.96	0.41	0	0.02	4.2	0.04				1.4				51.3	156.8	13.5	5.070422535	5.208333333	3.458333333
257	0	110	1	0	M	57	9	0	5.46	4.83	14.7	86.5	132	0	4.03	1.2	0.23	0	0	2.5	0.03				1.4				51.5	154.7	10	7.070707071	5	3.358333333
258	0	110	0	1	M	57	10	0	4.35	4.43	13.8	86.7	136	0.01											1.5
259	0	110	0	2	M	57	11	0	7.7	4.2	12.8	86.4	162	0											1.6
260	0	110	0	3	M	57	12	0	6.54	4.11	12.5	89.3	175	0											1.1
261	0	110	0	4	M	57	13	0	5.22	4.17	12.6	89.7	192	0											1.1
262	0	110	0	5	M	57	14	0	5.41	4.02	12.3	92	212	0											0.8
263	0	110	0	6	M	57	15	0	5.4	3.85	12.1	91.4	265	0											0.9
264	0	110	0	7	M	57	16	0	4.26	3.76	11.7	91.8	250	0											0.9
265	0	110	0	7	M	57	16	0	4.52	3.72	11.2	90.3	246	0											1
266	0	110	0	8	M	57	17	0	5.07	3.64	11.3	90.1	231	0.01	3.73	0.93	0.34	0.06	0.01	3.2	0.03				1				49	152	18.3	0.647249191	3.225806452	4.010752688
267	0	110	0	9	M	57	18	0	4.66	3.52	10.9	93.2	207	0	3.02	1.22	0.36	0.04	0.02	2.5	0.03				0.7				50.9	150.3	19.7	1.597444089	3.278688525	2.475409836
268	0	110	0	10	M	57	19	0	4.77	3.05	9.5	89.8	214	0	3.18	1.22	0.32	0.03	0.02	1.6	0.02				0.8				48	152.7	11.5	1.063829787	1.639344262	2.606557377
269	0	110	0	11	M	57	20	0	3.16	3.33	10.4	88.9	234	0	1.55	1.27	0.26	0.06	0.02	0.8	0.01				1				48.9	158.5	11	0.85106383	1.57480315	1.220472441
270	0	110	0	12	M	57	21	0	4.39	3.57	11	88.8	245	0	2.42	1.44	0.39	0.11	0.03	0.7	0.01				1				47.4	158.5	9.7	0.849858357	2.777777778	1.680555556
271	0	110	0	13	M	57	22	0	4.15	3.63	11.3	88.2	279	0	2.14	1.45	0.39	0.13	0.04	0.7	0.01				1.1				49.9	161	13.1	1.719197708	2.75862069	1.475862069
272	0	110	0	16	M	57	25	0	3.75	3.56	11	86.8	235	0	1.4	1.77	0.42	0.13	0.03	0.6	0.01				1.5				47.1	158.2	7.3	0.255754476	1.129943503	0.790960452
273	0	110	0	17	M	57	26	0	3.29	3.61	11.2	87	240	0	1.19	1.6	0.33	0.14	0.03	0.6	0.01				1.5				47.1	159.6	6.9	0.328947368	1.25	0.74375
274	0	110	0	20	M	57	28	0	3.86	3.95	12.3	88.9	238	0	1.27	2.06	0.34	0.16	0.03	0.5	0.01				1.3				46.2	159.4	4.9	0.647249191	0.970873786	0.616504854
275	0	111	1	0	F	75	7	0	5.7	4.65	14.6	91.2	177	0	4.59	0.96	0.13	0	0.02	4.2	0.04				0.8				52.9	155.2	12.5	12.38938053	6.25	4.78125
276	0	112	1	0	M	52	9	0	7.86	5.13	15.1	84.8	192	0	6.58	0.99	0.28	0	0.01	3.0	0.03				2.6				49.8	151	9.1	5.042016807	5.050505051	6.646464646
277	0	113	1	0	M	56	1	0	5.97	4.59	13.9	86.7	136	0	4.64	0.98	0.34	0	0.01	1.0	0.01				2.2				50.3	152.6	8.2	1.030927835	4.081632653	4.734693878
278	0	114	1	0	M	73	5	1	2.46	4.21	12.5	86.7	107	0	1.25	0.75	0.46	0	0	1.3	0.01				2.2				50.9	157.8	9.3	2.870813397	1.333333333	1.666666667
279	0	115	1	0	M	57	10	1	9.74	5.55	16.4	84.7	263	0	7.89	1.27	0.54	0	0.04	7.1	0.09				2.8				49	158.2	11	3.854389722	7.086614173	6.212598425
280	0	116	1	0	M	84	7	1	12.81	4.78	14.7	85.4	199	0	10.62	1.55	0.61	0	0.03	3.2	0.05				2.7				52.5	162.6	5.2	4.816955684	1.935483871	6.851612903
281	0	117	1	0	M	57	2	0	7.85	5.06	16.3	91.3	194	0	6.1	0.82	0.89	0.01	0.03	3.7	0.03				1				48.6	156.6	3.7	0.261437908	1.219512195	7.43902439
282	0	118	1	0	M	89	7	1	10.09	5.16	14.7	81.8	174	0	9.45	0.53	0.1	0	0.01	24.5	0.13				5				55	148.2		37.5	5.660377358	17.83018868
283	0	119	1	0	M	86	3	1	14.07	5.62	16	83.3	149	0.03	11.88	0.95	1.21	0	0.03	21.1	0.2				4.4				45	147.4	25.3	4.429783223	20	12.50526316
284	0	120	1	0	F	68	7	1	5.6	4.82	13.7	83.8	162	0	5.01	0.37	0.18	0.03	0.01	8.1	0.03				3.6				49.7	144.5		9.756097561	5.405405405	13.54054054
285	0	121	1	0	M	69	4	1	9.43	5.13	14.8	83	167	0	6.46	2.13	0.62	0.21	0.01	1.9	0.04				2.9				49.4	152.7	4.2	0.379506641	0	3.03286385
286	0	122	1	0	M	49	8	0	9.85	5.04	14.2	83.5	378	0	7.72	1.33	0.65	0.12	0.03	5.3	0.07				2.6				48.2	151.1	9	1.008403361	5.263157895	5.804511278
287	0	122	0	4	M	49	12	0	9.29	5.02	14.1	83.9	542	0											2.5
288	0	122	0	7	M	49	15	0	7.87	5.27	14.8	83.1	476	0											2.7
289	0	122	0	9	M	49	17	0	7.26	5.19	14.5	82.5	394	0											3
290	0	123	1	0	M	82	5	1	13.51	5.53	16.4	88.6	136	0	11.69	1.33	0.46	0.01	0.02	13.5	0.18				2.1				49.2	152.3	12.8	8.133971292	9.77443609	8.789473684
291	0	124	1	0	M	68	7	0	6.71	4.99	15.5	90.6	245	0	5.09	1.07	0.5	0.02	0.03	4.7	0.05				1				50.7	153.1	15	5.529953917	9.345794393	4.757009346
292	0	125	1	0	M	63	3	0	7.06	4.74	14.3	90.5	151	0.01	4.72	1.57	0.76	0	0.01	2.5	0.04				1				50.9	152.3	10.2	3.576751118	7.643312102	3.006369427
293	0	126	1	0	M	81	10	1	5.98	4.52	13.5	85.8	164	0	4.78	0.82	0.36	0.01	0.01	3.7	0.03				1.8				53.4	156.3		19.56521739	6.097560976	5.829268293
294	0	126	0	2	M	81	12	1	10.34	4.38	13.3	88.6	201	0	9.22	0.73	0.36	0	0.03	5.5	0.04				1.3				52.2	150.9	16.4	10.89108911	8.219178082	12.63013699
295	0	127	1	0	M	52	7	0	5.87	4.98	15.8	85.9	141	0	4.33	0.94	0.59	0	0.01	2.1	0.02				1.6				52.6	157.2	9.6	0.391389432	2.127659574	4.606382979
296	0	127	0	4	M	52	11	0	6.12	4.47	13.6	89	130	0	3.97	1.46	0.59	0.09	0.01	2.1	0.03				0.8				51.9	150.4	11.6	2.734375	6.164383562	2.719178082
297	0	128	1	0	M	78	5	1	4.35	4.87	15.9	92.4	91	0	3.15	0.77	0.43	0	0	2.6	0.02				1.9				54.7	161.8	9.1	7.672634271	2.597402597	4.090909091
298	0	129	1	0	M	84	3	0	3.33	4.52	12.8	80.8	174	0	1.94	0.93	0.46	0	0	1.1	0.01				6				50.2	161.3	4.3	2.173913043	1.075268817	2.086021505
299	0	130	1	0	M	73	7	1	6.65	4.91	14.3	84.5	186	0	5.35	0.92	0.37	0	0.01	4.3	0.04				2.8				55.4	159.6		2.167182663	1.086956522	5.815217391
300	0	131	1	0	M	90	3	1	2.92	2.59	7.3	88	89	0	2.19	0.5	0.23	0	0	4.0	0.02				3.3				55.7	163.3		14.14634146	2	4.38
301	0	132	1	0	M	84	7	1	8.25	6.34	20.2	88.8	131	0	6.27	0.75	0.82	0.37	0.04	6.7	0.05				2.8				47.4	155.2	10.7	4.149377593	4	8.36
302	0	133	1	0	M	62	3	1	5.74	4.14	11.7	87.2	168	0	4.29	0.86	0.57	0	0.02	3.5	0.03				2.6				53.8	151.9	17.4	0	2.325581395	4.988372093
303	0	134	1	0	M	80	15	1	5.93	4.03	12.8	97.5	146	0.01	5.25	0.4	0.26	0.01	0.01	7.5	0.03				1.8				51.6	155.1	17.5	10.38961039	0	13.125
304	0	134	0	2	M	80	2	1	5.47	3.39	10.9	100.9	104	0	4.95	0.25	0.25	0.01	0.01	8.0	0.02				1.3				53.4	151.2	20	17.20930233	0	19.8
305	0	134	0	3	M	80	3	1	5.76	4.04	13.3	105	133	0.06	5.3	0.23	0.23	0	0	21.7	0.05				0.9				56.8	151		29.35323383	8.695652174	23.04347826
306	0	135	1	0	M	66	7	0	5.36	4.68	13.9	85.3	179	0	4.3	0.78	0.28	0	0	6.4	0.05				2.2				53.1	153.1		7.2	1.282051282	5.512820513
307	0	136	1	0	M	61	5	0	5.13	4.85	15.3	87.4	117	0	4.45	0.5	0.17	0	0.01	4.0	0.02				1.3				54.6	163.5	14	8.974358974	6	8.9
308	0	136	0	5	M	61	10	0	8.21	4.27	13.8	89.2	196	0	7.62	0.35	0.21	0	0.03	22.9	0.08				1.2				57.5	152.9		23.42857143	8.571428571	21.77142857
309	0	136	0	7	M	61	12	0	3.54	4.55	14.1	90.5	301	0	2.6	0.55	0.24	0.13	0.02	5.5	0.03				1.1				54	146.3	27.3	3.846153846	14.54545455	4.727272727
310	0	136	0	8	M	61	13	0	3.6	4.29	13.6	89.7	327	0											1.1
311	0	136	0	9	M	61	14	0	3.96	4.55	14.1	89	353	0	2.9	0.51	0.34	0.2	0.01	7.8	0.04				1.2				57	150.7	23.5	4.276315789	9.803921569	5.68627451
312	0	136	0	10	M	61	15	0	4.54	4.45	14.2	90.3	344	0	3.25	0.57	0.46	0.22	0.04	10.5	0.06				1				53.2	148.2	21.1	1.488833747	7.01754386	5.701754386
313	0	136	0	11	M	61	16	0	5.12	4.55	14.2	90.5	395	0	3.65	0.78	0.53	0.13	0.03	9.0	0.07				0.8				52.2	148.5	19.2	1.084598698	7.692307692	4.679487179
314	0	136	0	12	M	61	17	0	4.85	4.72	14.8	90.9	369	0	3.29	0.89	0.54	0.1	0.03	9.0	0.08				1				52.8	151.6	18	1.639344262	4.494382022	3.696629213
315	0	136	0	13	M	61	18	0	5.27	4.4	13.6	90.7	425	0	3.32	1.11	0.74	0.07	0.03	6.3	0.07				0.9				52.4	154.5	13.5	0.583090379	2.702702703	2.990990991
316	0	136	0	14	M	61	19	0	5.47	4.31	13.8	90.7	412	0	3.53	1.13	0.72	0.04	0.05	4.4	0.05				1				51.6	156.5	14.2	0.980392157	4.424778761	3.123893805
317	0	137	1	0	M	82	7	1	9	4.93	14.6	85.2	298	0	8.09	0.55	0.36	0	0	18.2	0.1				2.6				50.5	149.8	20	14.24050633	12.72727273	14.70909091
318	0	137	0	1	M	82	8	1	8.7	4.65	14.2	86.7	271	0	7.72	0.69	0.27	0	0.02	17.4	0.12				2.3				50.5	148.7	11.6	13.08016878	5.797101449	11.1884058
319	0	137	0	2	M	82	9	1	9.47	4.3	12.9	86.5	337	0											2.4
320	0	137	0	4	M	82	11	1	8.2	4.48	13.2	85.7	283	0	7.7	0.28	0.21	0	0.01	50.0	0.14				2.9				53.9	148.3	17.9	10.10638298	10.71428571	27.5
321	0	138	1	0	M	67	7	0	4.57	5.04	15.2	86.7	110	0	3.38	0.81	0.38	0	0	2.5	0.02				2.1				56.2	163.1	12.3	4.504504505	2.469135802	4.172839506
322	0	139	1	0	F	69	3	0	4.52	4.45	12.6	84.9	197	0	3.06	1.32	0.13	0	0.01	2.3	0.03				3.5				51.9	150.5	6.1	6.603773585	1.515151515	2.318181818
323	0	140	1	0	M	47	4	0	4.68	4.69	14.4	85.7	199	0	2.9	1.37	0.39	0.01	0.01	1.5	0.02				1.8				50.5	157.3	16.1	1.432664756	2.919708029	2.116788321
324	0	140	0	2	M	47	6	0	4.17	4.46	13.2	87	170	0	2.71	1.2	0.25	0	0.01	0.8	0.01				1.6				50.2	150.5	10.8	1.680672269	2.5	2.258333333
325	0	140	0	6	M	47	10	0	5.66	4.61	13.4	85.2	235	0.01	3.49	1.6	0.54	0.01	0.02	2.5	0.04				2.2				52.5	148.1	20	3.696098563	5.625	2.18125
326	0	141	1	0	F	47	3	0	7.33	4.45	13.6	90.6	224	0	5.1	1.38	0.7	0.12	0.03	3.6	0.05				1.1				47.6	160	11.6	0.320512821	1.449275362	3.695652174
327	0	142	1	0	M	71	8	1	7.37	4.21	12.5	85.5	251	0.01	6.31	0.65	0.36	0.01	0.04	67.7	0.44				2.2				52.3	147.8	16.9	6.727828746	9.230769231	9.707692308
328	0	143	1	0	M	74	6	1	10.88	4.63	13	87.3	387	0.01	9.21	0.97	0.67	0.01	0.02	13.4	0.13				2.6				51.7	150.5	9.3	3.220338983	6.18556701	9.494845361
329	0	144	1	0	M	36	7	0	5.09	5.28	14.1	79.4	214	0	2.87	1.64	0.56	0	0.02	1.2	0.02				6.9				54.2	165.2	11	0.823045267	1.219512195	1.75
330	0	145	1	0	M	49	10	0	6.77	5	13.8	80	216	0	5.37	1.04	0.33	0.02	0.01	2.9	0.03				5.2				52.7	150.2	8.7	2.693602694	4.807692308	5.163461538
331	0	146	1	0	M	54	8	0	4.74	4.21	12.6	85.7	173	0	3.63	0.68	0.37	0.05	0.01	2.9	0.02				2.4				51.2	153.5	10.3	1.78041543	4.411764706	5.338235294
332	0	147	1	0	F	89	10	1	6.38	3.03	8.9	95.7	216	0	5.39	0.67	0.3	0.02	0	9.0	0.06			5.1	1.3			11.00	57.8	148.3		7.924528302	2.985074627	8.044776119
333	0	148	1	0	M	77	7	1	8.28	3	9.7	91.3	176	0	7.96	0.16	0.16	0	0	37.5	0.06				6.8				57.6	139.5		31.65467626	0	49.75
334	0	149	1	0	M	76	6	0	4.57	4.49	13.4	87.3	166	0	3.22	1.07	0.27	0	0.01	2.8	0.03				2.4				54.1	154.4	6.5	5.284552846	2.803738318	3.009345794
335	0	150	1	0	M	56	6	1	9.08	5.57	16.7	85.6	32	0.01	8.19	0.67	0.2	0	0.02	19.4	0.13				2.3				47.2	149.9	9	10.40462428	4.47761194	12.2238806
336	0	151	1	0	M	64	5	1	6.68	4.28	12.4	82.7	222	0.01	5.53	0.78	0.35	0.01	0.01	11.5	0.09				3.8				48.3	149.8	6.4	2.147239264	2.564102564	7.08974359
337	0	152	1	0	M	66	2	0	5.37	4.94	14.7	85	241	0	2.91	1.73	0.46	0.23	0.04	1.7	0.03				2				51	159	2.9	0.5	0	1.682080925
338	0	153	1	0	M	96	1	0	6.03	4.81	15.2	95	171	0	4.86	0.37	0.72	0.06	0.02	2.7	0.01				1.3				51.2	159.8	13.5	2.909647779	0	13.13513514
339	0	154	1	0	M	60	7	0	5.98	4.39	13.8	88.6	164	0	3.97	1.54	0.46	0	0.01	1.3	0.02				1.6				48.9	158	3.9	3.037974684	1.298701299	2.577922078
340	0	155	1	0	F	84	1	0	7.09	5.23	14.8	82.8	210	0	5.91	0.73	0.45	0	0	4.1	0.03				4.6				51.3	154.9	9.6	4.126213592	1.369863014	8.095890411
341	0	156	1	0	F	72	8	0	10.82	4.48	13.1	85.9	247	0	9.36	0.96	0.47	0	0.03	19.8	0.19				2.5				50.8	152.7	17.7	5.076142132	11.45833333	9.75
342	0	157	1	0	M	81	1	1	14.18	4.3	11.6	88.1	160	0.02	11.2	2.37	0.58	0.01	0.02	3.8	0.09				8.2				56.4	156.3	3.8	1.972386588	1.265822785	4.725738397
343	0	158	1	0	M	54	2	0	7.17	5.23	15.3	83.7	221	0	5.59	1.02	0.53	0.01	0.02	4.9	0.05				2.2				51.8	154.8	10.8	3.27510917	6.862745098	5.480392157
344	0	159	1	0	M	71	8	0	6.43	3.49	10.8	96	210	0	5.66	0.38	0.27	0.11	0.01	18.4	0.07				0.8				51.5	147.9		3.75	7.894736842	14.89473684
345	0	160	1	0	M	37	7	0	8.83	5.34	15.3	83.3	130	0	6.87	1.25	0.6	0.1	0.01	2.4	0.03				3.4				52.3	155.8	8.8	0.191570881	1.6	5.496
346	0	161	1	0	F	81	4	1	7.66	3.67	10.3	88.3	257	0	5.78	1.42	0.41	0.03	0.02	4.9	0.07				3.4				47	162.9	7.7	0.56022409	1.408450704	4.070422535
347	0	162	1	0	F	90	6	1	8.3	4.07	12.2	87.7	164	0	7.3	0.68	0.31	0	0.01	7.4	0.05				1.5				51.6	152	7.4	3.533568905	2.941176471	10.73529412
348	0	163	1	0	F	50	6	0	9.72	4.46	12.3	84.8	251	0	8.38	1.11	0.22	0	0.01	6.3	0.07				3.5				51.8	159.5	11.7	4.639175258	3.603603604	7.54954955
349	0	164	1	0	M	68	6	1	5.12	4.68	13.4	83.5	140	0	4.17	0.74	0.2	0	0.01	2.7	0.02				3.1				53.4	163.2	13.5	11.62790698	1.351351351	5.635135135
350	0	165	1	0	F	56	3	1	7.76	3.11	8.4	84.2	280	0	6.66	0.66	0.42	0.01	0.01	4.5	0.03				6.1				51.5	154.4	24.2	0.810810811	1.515151515	10.09090909
351	0	166	1	0	M	74	3	1	6.66	4.75	14.6	88.4	104	0	5.04	1.18	0.43	0	0.01	4.2	0.05				1.1				50.8	151.9	6.8	10.79691517	0.847457627	4.271186441
352	0	167	1	0	M	55	7	0	2.35	4.15	12.5	88.2	139	0.01	1.44	0.63	0.28	0	0	1.6	0.01				1.2				57.8	162.9	25.4	2.81124498	12.6984127	2.285714286
353	0	168	1	0	M	59	3	0	3.98	4.69	14	84.9	141	0	2.3	1.45	0.22	0	0.01	1.4	0.02				2.3				50.2	151.5		2.139037433	1.379310345	1.586206897
355	0	170	1	0	M	81	3	0	8.38	4.35	11.3	79.1	198	0	7.4	0.45	0.52	0	0.01	11.1	0.05				9.2				49.4	160.6	17.8	2.428256071	6.666666667	16.44444444
356	0	171	1	0	M	73	10	0	13.56	3.54	10.5	89.5	161	0	11.12	1.2	1.02	0.19	0.03	15.8	0.19				1.2				57.6	158.1	17.5	1.300108342	0.833333333	9.266666667
357	0	172	1	0	M	87	7	0	9.3	4.33	12.8	87.3	266	0	6.78	1.53	0.96	0.01	0.02	2.6	0.04				5.4				47.1	158.1	5.2	0.804597701	3.921568627	4.431372549
358	0	173	1	0	M	57	10	1	3.79	4.12	12.8	87.6	142	0	2.9	0.63	0.25	0	0.01	3.2	0.02				1.9				55.7	143.9	14.3	22.406639	6.349206349	4.603174603
359	0	174	1	0	M	65	3	0	12.96	4.8	14.8	90.4	167	0.03	10.64	1.41	0.88	0	0.03	14.9	0.21				2				49.9	153.7	22.7	4.798962387	9.929078014	7.546099291
360	0	175	1	0	F	91	1	1	6.99	4.26	12.8	83.3	171	0	5.9	0.78	0.3	0	0.01	5.1	0.04				3				48.9	151.5	9	3.703703704	2.564102564	7.564102564
361	0	176	1	0	F	67	9	0	4.77	4.87	15.6	91.6	155	0.01	2.76	1.57	0.42	0	0.02	1.3	0.02				0.7				51.4	160.1	5.7	1.38121547	2.547770701	1.757961783
362	0	177	1	0	F	64	4	0	11.83	2.64	8.2	89.8	413	0	10.99	0.68	0.15	0	0.01	8.8	0.06				2.7				51.3	159.5	11.8	2.34375	1.470588235	16.16176471
363	0	178	1	0	M	67	0	1	5.48	4.19	11.5	81.4	187	0	4	1	0.48	0	0	6.0	0.06				6.4				51	155.3	7	3.178484108	2	4
364	0	179	1	0	M	75	10	0	6.66	5.27	14.9	85	148	0	5.6	0.55	0.48	0.01	0.02	7.3	0.04				3.5				53.8	161.6	10.9	6.965174129	0	10.18181818
365	0	179	0	2	M	75	12	0	6.32	4.93	13.7	83.8	191	0											3.9
366	0	179	0	3	M	75	13	0	7.42	4.96	14.1	85.5	229	0.01											3.4
367	0	179	0	5	M	75	15	0	8.51	4.79	13.6	84.8	316	0.01	7.45	0.53	0.49	0.03	0.01	9.4	0.05				3.6				53.2	153.3	11.3	2.097902098	3.773584906	14.05660377
368	0	179	0	6	M	75	16	0	10.92	4.77	13.7	84.1	327	0											3.8
369	0	179	0	6	M	75	16	0	10.89	4.58	12.7	83	313	0											4.1
370	0	179	0	7	M	75	17	0	10.76	4.46	12.3	86.5	347	0											2.4
371	0	179	0	8	M	75	18	0	14.09	4.64	12.7	85.6	380	0											2.8
372	0	179	0	9	M	75	19	0	16.68	4.52	12.5	85	432	0	15.52	0.4	0.74	0	0.02	27.5	0.11				3.1				48.5	151.8	25	0.305810398	10	38.8
373	0	179	0	10	M	75	20	0	15.49	4.77	13.7	85.1	445	0.01	14.07	0.42	0.98	0	0.02	35.7	0.15				3.2				46	153.3	21.4	0.451977401	9.523809524	33.5
374	0	179	0	11	M	75	21	0	15.41	4.99	13.8	83.8	408	0											3.7
375	0	179	0	12	M	75	22	0	16.15	5.1	14.3	85.3	408	0	13.39	0.77	1.86	0.08	0.05	27.3	0.21				3.2				50.8	155.7	16.9	0.566037736	3.896103896	17.38961039
376	0	179	0	13	M	75	23	0	18.95	4.96	13.7	86.3	336	0											2.5
377	0	179	0	14	M	75	24	0	18.39	4.91	13.5	85.5	337	0	15.77	0.9	1.61	0.07	0.04	42.2	0.38				2.7				51.1	158.1	11.1	0.140252454	1.111111111	17.52222222
378	0	179	0	15	M	75	25	0	15.72	5.21	14.3	83.7	311	0											3.6
379	0	179	0	16	M	75	26	0	13.77	5.16	14.3	83.3	280	0	10.68	1.22	1.64	0.18	0.05	24.6	0.3				3.9				49.8	160.6	6.6	0.348675035	0.819672131	8.754098361
380	0	180	1	0	M	67	7	1	8.45	4.64	13.6	87.9	274	0	7.29	0.64	0.51	0	0.01	7.8	0.05				1.5				52.9	147	20.3	1.495726496	6.25	11.390625
381	0	181	1	0	M	36	4	0	10.22	5.28	15.8	83.3	176	0	8.25	1.3	0.56	0.07	0.04	5.4	0.07				2.5				52	161.8	11.5	2.801724138	5.384615385	6.346153846
382	0	182	1	0	M	67	7	0	6.53	4.4	12.9	87.7	154	0	3.9	1.48	1.05	0.07	0.03	1.4	0.02				1.6				51.6	152	4.1	0.753498385	0	2.635135135
383	0	183	1	0	M	53	10	0	7.86	5.48	15.6	81.8	170	0	6.15	1.09	0.58	0	0.04	4.6	0.05				3.4				49.5	156.3	15.6	5.555555556	6.422018349	5.642201835
384	0	184	1	0	F	74	7	0	6.24	4.48	13.9	87.1	233	0	3.6	2.1	0.38	0.12	0.04	1.4	0.03				1.6				54.3	168.2		8.722741433	8.095238095	1.714285714
385	0	185	1	0	M	70	2	0	3.46	4.25	13.3	92.5	144	0.01	1.32	1.78	0.34	0.01	0.01	1.1	0.02				0.9				53.3	160.2	7.9	8.064516129	1.123595506	0.741573034
386	0	186	1	0	F	76	6	1	3.77	3.35	10.4	94.6	122	0	2.38	1.13	0.25	0	0.01	0.9	0.01				0.6				56.1	159.3	15.9	3.056768559	4.424778761	2.10619469
387	0	187	1	0	M	78	7	0	5.23	4.91	14.4	85.1	141	0	4.45	0.48	0.3	0	0	2.1	0.01				2.2				55.3	150.6	10.4	0.732600733	4.166666667	9.270833333
388	0	188	1	0	M	70	5	1	3.58	4.76	13.8	84.2	152	0.01	2.61	0.74	0.23	0	0	1.4	0.01				2.3				53.3	162.4	8.1	5.472636816	1.351351351	3.527027027
389	0	189	1	0	M	93	7	1	5.8	3.99	11.2	86.2	174	0	4.73	0.87	0.18	0.01	0.01	3.4	0.03				5.1				50.7	159.5	13.8	17.61006289	0	5.436781609
390	0	189	0	2	M	93	9	1	6.33	4.64	13.3	87.5	204	0.01											4.4
391	0	189	0	4	M	93	11	1	8.48	4.45	12.9	88.5	212	0.08	7.33	0.88	0.25	0	0.02	9.1	0.08				4.6				53.1	149.3	22.7	12.32876712	10.22727273	8.329545455
392	0	190	1	0	F	50	4	0	5.8	4.99	14.6	90	120	0	3.19	1.87	0.73	0	0.01	1.1	0.02			3	1.2			3.60	55.5	165.3	5.9	0.470957614	1.069518717	1.705882353
393	0	191	1	0	M	85	3	0	5.55	5.45	16.5	88.6	105	0	4.17	0.86	0.51	0	0.01	5.8	0.05				1.4				53.6	162.5		11.36363636	4.651162791	4.848837209
394	0	192	1	0	F	74	14	0	17.43	4.64	13.3	85.1	278	0.01	16.22	0.82	0.34	0.02	0.03	15.9	0.13				2.7				52.8	150.7	17.1	5.555555556	9.756097561	19.7804878
395	0	193	1	0	M	53	5	0	7.67	5.15	15	85.6	184	0	5.11	1.93	0.56	0.05	0.02	2.1	0.04				2.5				48.4	161.6	8.8	2.074688797	2.590673575	2.647668394
396	0	194	1	0	M	84	5	1	4.65	4.46	13.9	87.9	162	0	3.61	0.69	0.35	0	0	2.9	0.02				1.3				46.8	149.5	8.7	6.031746032	5.797101449	5.231884058
397	0	195	1	0	M	58	3	0	11.69	5.93	17.5	85.3	153	0	8.86	2.01	0.8	0.01	0.01	2.5	0.05				2.7				48.7	165.5	1.5	2.567760342	0	4.407960199
398	0	196	1	0	M	91	5	1	9.58	3.55	11.5	94.6	157	0	7.79	0.86	0.9	0.01	0.02	8.1	0.07				0.5				49.4	154.9	5.8	1.552393273	0	9.058139535
399	0	197	1	0	M	54	2	0	6.91	5.08	14.6	83.3	139	0	5.33	1.17	0.41	0	0	2.6	0.03				3.4				57.2	155.9	12	14.67391304	1.709401709	4.555555556
400	0	198	1	0	M	58	1	0	9.96	5.51	16.4	86.6	226	0	6.92	1.27	1.68	0.05	0.04	3.9	0.05				1.8				56.9	160.8	13.4	0.345303867	3.149606299	5.448818898
401	0	199	1	0	M	77	5	1	9.86	4.37	13.3	87.6	178	0	8.78	0.73	0.34	0	0.01	13.7	0.1				2				47.8	137.3		8	4.109589041	12.02739726
402	0	200	1	0	M	72	10	1	5.5	6.11	13	65	118	0	4.26	0.9	0.33	0	0.01	3.3	0.03				42.5				49.2	153.9		1.748251748	4.444444444	4.733333333
403	0	201	1	0	M	61	0	1	7.89	4.79	14.4	88.9	292	0	5.62	0.85	1.09	0.29	0.04	2.4	0.02				1.7				55.8	156.2	17.6	0.408163265	1.176470588	6.611764706
404	0	202	1	0	M	76	2	1	8.3	2.9	9.1	96.2	128	0.01	7.04	0.54	0.71	0	0.01	9.3	0.05				1.5				53.2	151.9	24.1	1.587301587	5.555555556	13.03703704
405	0	203	1	0	M	43	6	1	5.97	5.68	16	84.9	206	0	4.98	0.51	0.47	0	0.01	9.8	0.05				3.8				57.7	162.8	7.8	6.718346253	1.960784314	9.764705882
406	0	204	1	0	F	69	15	0	6.36	4.31	12.8	88.6	456	0	4.23	1.61	0.51	0	0.01	1.9	0.03				1.3				51.1	150.2	9.9	4.964539007	5.590062112	2.627329193
407	0	205	1	0	M	57	8	0	5	5.43	12.1	70	174	0	3.69	0.82	0.47	0	0.02	3.7	0.03				27.8				58.7	154	18.3	4.849884527	3.658536585	4.5
408	0	206	1	0	M	48	7	0	2.49	4.13	13.6	92.3	136	0	1.38	0.81	0.28	0.01	0.01	0.0	0				0.5				50	156.9	3.7	0	1.234567901	1.703703704
409	0	207	1	0	M	62	10	0	6.52	4.27	11.9	83.1	197	0	5.27	0.97	0.28	0	0	9.3	0.09				4.9				61.1	157.5		14	13.40206186	5.432989691
410	0	208	1	0	F	95	3	1	2.61	2.15	9.6	121.4	55	0.01	1.78	0.66	0.17	0	0	6.1	0.04			5.8	2.3			3.20	62.5	169.5		33.33333333	1.515151515	2.696969697
411	0	209	1	0	M	45	5	0	7.75	6.19	14.9	72.5	119	0	6.38	0.97	0.39	0	0.01	4.1	0.04				22.5				50.8	154.4		5.83090379	4.12371134	6.577319588
412	0	210	1	0	M	66	7	1	6.75	3.01	9.7	93	262	0	6.27	0.19	0.15	0.14	0	26.3	0.05				1.8				48.5	149.1	26.3	6.474820144	15.78947368	33
413	0	211	1	0	M	77	7	0	7.72	4.36	13.3	93.8	115	0	5.93	1.3	0.47	0	0.02	10.0	0.13				2.1				58.2	154.5		16.22911695	4.615384615	4.561538462
414	0	212	1	0	M	67	2	1	7.39	4.42	15.5	105.4	200	0	3.99	1.46	1.67	0.25	0.02	6.2	0.09	0.0318	30.7	5.3	1.1	-2.5	0.8	10.60	50.5	164.8		0.276243094	2.054794521	2.732876712
415	0	213	1	0	M	72	20	1	6.56	5.58	16.7	87.6	154	0	4.84	1.25	0.45	0	0.02	1.6	0.02				1.4				53.8	162.5	9.6	2.01511335	2.4	3.872
416	0	214	1	0	M	81	5	1	3.98	4.5	14.6	89.3	109	0	3.06	0.39	0.51	0	0.02	12.8	0.05			3.4	2.8			3.70	57.4	159.1	12.8	1.096491228	7.692307692	7.846153846
417	0	215	1	0	M	76	4	1	4.78	4.03	14.2	95.8	116	0	3.17	0.92	0.66	0	0.03	6.5	0.06				1.3				58.7	161.7	5.4	1.535836177	1.086956522	3.445652174
418	0	216	1	0	F	64	7	0	3.21	4.46	13.9	88.8	143	0	1.77	1.23	0.2	0	0.01	0.8	0.01				1.2				50.8	157.7		4.90797546	1.62601626	1.43902439
419	0	216	0	2	F	64	9	0	3.97	4.22	13.1	88.6	156	0	2.48	1.23	0.24	0	0.02	0.8	0.01				1.4				52.5	154.1		8.780487805	2.43902439	2.016260163
420	0	216	0	3	F	64	10	0	5.13	4.37	13.5	87.2	215	0											1.7
421	0	216	0	4	F	64	11	0	5.17	4.19	12.8	86.4	231	0	3.4	1.43	0.34	0	0	2.8	0.04				1.6				56	148.8		9.446254072	2.797202797	2.377622378
422	0	216	0	6	F	64	13	0	5.12	4.43	13.7	86.7	392	0											1.9
423	0	216	0	7	F	64	14	0	3.19	3.84	11.8	85.2	364	0											2.1
424	0	216	0	9	F	64	16	0	4.35	3.9	11.9	84.1	424	0	1.75	1.95	0.51	0.11	0.03	1.0	0.02				2.6				47.2	141.9	10.3	1.138952164	2.564102564	0.897435897
425	0	217	1	0	M	91	6	1	5.84	3.73	10.8	88.7	123	0.01	3.72	1.51	0.6	0	0.01	1.3	0.02			11.5	1.5			14.10	55.2	158.1	6.6	4.887218045	1.324503311	2.463576159
426	0	217	0	3	M	91	9	1	13.27	3.91	11.3	87	168	0	11.77	1.19	0.28	0.01	0.02	16.0	0.19				2.2				55.5	154.8	11.8	22.22222222	4.201680672	9.890756303
427	0	217	0	5	M	91	11	1	7.77	3.63	10.4	86.8	212	0.01	6.65	0.78	0.29	0.04	0.01	12.8	0.1				2.5				55.8	155.9	15.4	16.12903226	6.41025641	8.525641026
428	0	217	0	7	M	91	13	1	10.45	2.69	9.5	90.7	250	0.01								0.0135	26.4	9.603399433	2.7	-2.5	0.5	33.00
429	0	218	1	0	M	83	7	0	9.8	4.89	14.2	84.3	187	0	7.39	1.79	0.47	0.13	0.02	1.7	0.03				2.7				52.4	161.7	5	2.481389578	0	4.12849162
430	0	219	1	0	M	64	6	0	4.95	5.35	15	83.2	195	0	3.49	1.19	0.27	0	0	2.5	0.03				3.6				52	147.8	10.1	5.306122449	2.521008403	2.932773109
431	0	220	1	0	M	68	3	1	9.81	4.26	12.6	86.6	356	0	8.1	1.15	0.53	0.02	0.01	6.1	0.07				1.7				51.3	145.5	8.7	3.711790393	6.086956522	7.043478261
432	0	221	1	0	M	76	7	0	9.45	4.75	14.4	84.2	115	0	8.79	0.45	0.19	0	0.02	262.2	1.18				2.3				69.7	154.6		33.14606742	2.222222222	19.53333333
433	0	222	1	0	M	83	3	0	7.69	3.35	10.1	86	265	0	6.48	0.77	0.37	0.04	0.03	11.7	0.09				4.3				54.1	162.3	13	8.950617284	3.896103896	8.415584416
434	0	223	1	0	M	86	7	1	5.48	4.14	13.1	90.3	131	0	3.32	1.32	0.7	0.12	0.02	3.8	0.05				1.3				50	155.6	7.6	3.205128205	0.757575758	2.515151515
435	0	224	1	0	M	77	7	1	6.17	4.49	13.6	89.1	183	0	4.88	0.76	0.5	0.01	0.02	10.5	0.08				2				50.2	153.4	7.9	1.327433628	2.631578947	6.421052632
436	0	225	1	0	M	58	7	1	4.7	3.72	14.6	108.1	65	0.01	3.65	0.59	0.45	0	0.01	8.5	0.05			16.9	0.2			11.00	57.6	158.3		12.80193237	13.55932203	6.186440678
437	0	226	1	0	F	67	7	0	4.73	4.75	14.5	92.8	165	0	3.25	0.86	0.59	0.01	0.02	2.3	0.02				0.8				54.1	153.7	7	1.325757576	1.162790698	3.779069767
438	0	227	1	0	F	74	10	0	5.69	4.43	12.7	85.3	160	0	4.18	0.77	0.73	0	0.01	2.6	0.02				2.9				49.8	149.8	15.6	2.56	10.38961039	5.428571429
439	0	228	1	0	F	35	10	0	4.42	3.81	11.6	86.6	198	0	3.08	0.99	0.3	0.03	0.02	6.1	0.06				2				49	157.5	14.1	1.556420233	3.03030303	3.111111111
440	0	229	1	0	M	48	2	0	3.34	5.22	16.8	92.9	227	0	2.05	0.79	0.47	0.01	0.02	1.3	0.01				0.5				53.1	160.5	16.5	0.76142132	5.063291139	2.594936709
441	0	230	1	0	M	44	3	0	4.6	5.22	16.7	88.9	104	0	2.69	1.55	0.35	0	0.01	1.3	0.02				1.1				54	162.1	11	2.649006623	2.580645161	1.735483871
442	0	231	1	0	M	83	6	1	3.4	4.03	13.5	93.3	145	0	2.71	0.49	0.2	0	0	2.0	0.01				0.7				51.1	158.3	4.1	18.75	0	5.530612245
443	0	232	1	0	M	66	10	0	7.08	4.66	12.6	79.6	362	0	5.6	0.79	0.61	0.06	0.02	6.3	0.05				8.4				49.8	157.4	6.3	1.234567901	2.53164557	7.088607595
444	0	233	1	0	M	53	7	0	10.25	4.93	16.1	89	195	0	8.29	1.36	0.57	0	0.03	5.1	0.07	0.0261	34.6	3.187390543	1	-0.9	0.1	6.22	49.5	150.7	8.8	2.263374486	2.205882353	6.095588235
445	0	234	1	0	M	76	7	0	6.63	3.81	11.4	88.5	184	0	4.81	1.26	0.54	0	0.02	3.2	0.04				2.5				46.9	154.8	5.6	2.620087336	2.380952381	3.817460317
446	0	235	1	0	F	76	10	0	6.92	3.49	10.7	85.7	262	0	5.25	1.26	0.4	0	0.01	4.8	0.06				2				49.1	157.1	11.1	7.669616519	4.761904762	4.166666667
447	0	236	1	0	M	57	2	0	3.88	4.14	13.3	90.1	140	0	2.79	0.78	0.28	0	0.03	3.8	0.03				0.7				55	158.1	12.8	4.219409283	2.564102564	3.576923077
448	0	237	1	1	F	79	2	1	13.73	3.26	8.2	76.7	73	0.08	12.67	0.3	0.3	0.11	0.35	356.7	1.07	0.0978	28.6	18.77966102	20.7	2.2	3.3	13.71	45.4	137.6	30	0.716845878	10	42.23333333
449	0	237	0	1	F	79		1	13.85	3.28	8.4	77.7	77	0.12	12.68	0.23	0.38	0.1	0.46	491.3	1.13	0.0676	28.7	17.66784452	19.2	1.7	2.7	13.60	45.4	137.6		0.576368876	13.04347826	55.13043478
450	0	237	0	1	F	79	2	1	13.89	3.29	8.5	77.8	73	0.07	13.2	0.27	0.3	0.02	0.1	411.1	1.11	0.0619	29.2	19.69365427	18.1	2.3	2.4	14.38	45.2	138.4	25.9	1.408450704	11.11111111	48.88888889
451	0	237	0	2	F	79	3	1	15.48	3.52	9	77.3	78	0.05	14.42	0.34	0.11	0.12	0.49	347.1	1.18	0.0753	28.5	14.34814275	18.7	1.6	2.5	11.19	44.8	138.5		6	8.823529412	42.41176471
452	0	237	0	3	F	79	4	1	10.96	3.33	8.5	76.9	50	0.03	10.5	0.28	0.09	0.02	0.07	346.4	0.97	0.0596	29.3	18.36327345	19.3	2.5	2.7	9.18	46.4	138.6	35.7	6.024096386	21.42857143	37.5
453	0	237	0	4	F	79	5	1	7.1	4.18	10.8	79.4	58	0.03	6.46	0.42	0.06	0.11	0.05	250.0	1.05	0.066	28.8	17.97040169	16.4	2.2	3.2	10.42	45.1	138.9		29.31034483	19.04761905	15.38095238
454	0	237	0	5	F	79	6	1	7.13	3.6	9.2	79.7	33	0.01	6.29	0.66	0.09	0.06	0.03	159.1	1.05	0.0508	29.7	25.18656716	16.3	3	2.9	8.31	47.7	139.1	57.6	48.10126582	46.96969697	9.53030303
455	0	238	1	11	M	45	17	1	14.25	3.96	11.6	89.6	192	0	12.2	1.25	0.75	0	0.05	17.6	0.22	0.0293	22.7	1.732060799	1.8	-5.3	2.2	3.33	57.1	157.3	21.6	9.197080292	2.4	9.76
456	0	238	0	12	M	45	18	1	6.88	3.45	10	93	124	0.01	4.95	1.41	0.48	0.01	0.03	9.2	0.13	0.02	21.8	4.014410705	1.3	-5.8	2.8	4.98	56.8	157.2		8.823529412	2.127659574	3.510638298
457	0	238	0	13	M	45	19	1	9.66	3.51	10.2	91.5	143	0.02	6.43	1.97	1.06	0.16	0.04	12.7	0.25	0.0165	22	3.218173213	1.7	-5.8	1.8	4.60	55.9	160	11.7	3.497942387	1.52284264	3.263959391
458	0	238	0	14	M	45	20	1	8.49	3.33	9.8	91.6	169	0.03	5.61	1.71	1.01	0.11	0.05	21.1	0.36	0.014	24.3	3.998447205	1.7	-3.5	1.8	6.76	56.8	160.2	12.9	2.262931034	3.50877193	3.280701754
459	0	238	0	15	M	45	21	1	9.96	3.25	9.5	92.9	205	0.06	6.67	2.03	0.93	0.28	0.05	35.0	0.71	0.0247	24.3	3.908895045	1.4	-3.3	2	8.01	52.2	157	11.3	1.297169811	3.448275862	3.285714286
460	0	238	0	16	M	45	22	1	11.74	3.52	10.1	91.5	260	0.03	8.16	1.91	1.06	0.53	0.08	47.1	0.9	0.0422	25.5	2.734474827	1.6	-2.6	1.4	7.11	49.7	155	9.9	0.630252101	3.141361257	4.272251309
461	0	239	1	0	F	53	9	0	7.27	4.86	13.5	87.4	247	0	6.04	0.73	0.35	0.14	0.01	8.2	0.06	0.0345	27.2	5.700457112	3.4	-1.5	0.2	14.08	49.8	147.5	13.7	1.26984127	5.479452055	8.273972603
462	0	240	1	1	M	62	11	0	4.44	4.34	13	88.2	165	0	3.28	0.9	0.25	0	0.01	6.7	0.06	0.0252	29.9	8.304195804	1.5	-1.3	0.2	13.70	49.2	150.6		5.555555556	3.333333333	3.644444444
463	0	240	0	3	M	62	13	0	5.47	4.09	12.3	89	236	0	4.68	0.52	0.26	0	0.01	21.2	0.11	0.0217	29.1	6.407594186	1.4	-2	0.6	15.12	48.5	150	19.2	4.661016949	15.38461538	9
464	0	240	0	4	M	62	14	0	5.18	4	12.2	89.3	247	0	4.25	0.58	0.33	0.01	0.01	17.2	0.1	0.0156	30	5.204351661	1.4	-1	0.8	12.85	48.6	149.6	20.7	2.302631579	15.51724138	7.327586207
465	0	241	1	0	F	68	18	1	11.9	3.88	11.7	89.9	288	0.01	10.72	0.81	0.35	0	0.02	38.3	0.31	0.0198	31.4	3.914044513	2	0.8	0.6	11.27	50.2	158.4	42	11.18012422	34.56790123	13.2345679
466	0	241	0	0	F	68	18	1	8.76	3.38	10.3	89.6	264	0	7.86	0.7	0.2	0	0	20.0	0.14				2.1				50	159.1		9.826589595	28.57142857	11.22857143
467	0	241	0	1	F	68	19	1	13.18	3.33	10	90.7	294	0	11.78	0.97	0.34	0.07	0.02	20.6	0.2				2.1				52.5	156.6		11.76470588	26.80412371	12.1443299
468	0	241	0	2	F	68	20	1	8.85	2.99	9	92.6	250	0.01	7.79	0.62	0.31	0.12	0.01	21.0	0.13	0.015	30	5.521811154	1.9	-0.1	1.4	13.80	55.2	155.4	30.6	7.473309609	22.58064516	12.56451613
469	0	241	0	2	F	68	20	1	9.61	3.08	9.3	93.2	260	0	8.35	0.71	0.37	0.17	0.01	14.1	0.1	0.0139	28.4	4.274646006	1.8	-1.7	1.6	11.11	54.7	155.6	31	9.309309309	23.94366197	11.76056338
470	0	241	0	3	F	68	21	1	9.09	2.98	8.9	92.3	289	0	7.98	0.54	0.37	0.18	0.02	24.1	0.13	0.0134	27.7	4.456496109	2	-1.9	1.9	12.88	52.5	155.7	29.6	7.530120482	18.51851852	14.77777778
471	0	241	0	4	F	68	22	1	8.15	3.05	9	91.1	344	0.01	7.13	0.4	0.43	0.17	0.02	52.5	0.21	0.0174	29	3.570712136	2.5	-0.8	1.9	12.28	54	154.6	25	4.438642298	12.5	17.825
472	0	241	0	5	F	68	23	1	6.99	3.05	9	92.1	392	0.01	5.69	0.61	0.5	0.17	0.02	52.5	0.32	0.0226	28.1	2.626013394	2.1	-1.6	1.5	10.29	52	155.4	24.6	1.54185022	9.836065574	9.327868852
473	0	241	0	5	F	68	23	1	6.59	3.99	12.4	94.5	299	0	5.34	0.73	0.42	0.08	0.02	13.7	0.1	0.0215	32	2.937279152	0.7	0.4	0.3	8.78	53.7	158		3.225806452	13.69863014	7.315068493
474	0	241	0	6	F	68	24	1	7.36	2.96	8.9	91.2	404	0	5.96	0.69	0.61	0.08	0.02	50.7	0.35	0.032	29.4	2.630713581	2.2	-0.7	0.9	10.63	52.5	157	27.5	1.967799642	8.695652174	8.637681159
475	0	242	1	0	M	75	7	1	13.2	4.08	12.2	86.5	269	0	12.41	0.48	0.28	0	0.03	18.8	0.09	0.0306	24.4	2.126004667	2	-6.5	0.2	5.72	52	154.3	8.3	1.960784314	4.166666667	25.85416667
476	0	242	0	1	M	75	8	1	11.38	3.66	10.9	88.3	242	0	10.65	0.44	0.27	0	0.02	34.1	0.15	0.0256	24.5	2.658867323	1.6	-6.3	0.3	6.43	52.1	152.4	11.4	5.349794239	2.272727273	24.20454545
477	0	242	0	1	M	75	8	1	10.85	3.52	10.5	88.4	296	0	9.98	0.36	0.5	0	0.01	33.3	0.12	0.0268	24.7	3.275785746	1.7	-6.1	0.2	9.70	52.4	153.4	11.1	3.111111111	5.555555556	27.72222222
478	0	242	0	1	M	75	8	1	7.38	3.42	10.1	88.9	262	0	6.45	0.54	0.38	0	0.01	16.7	0.09	0.0202	23.4	2.506666667	1.6	-7.2	0.3	6.57	52.6	153.4	11.1	3.779069767	3.703703704	11.94444444
479	0	242	0	2	M	75	9	1	4.67	2.93	8.6	89.4	191	0	3.86	0.56	0.23	0.01	0.01	16.1	0.09	0.017	23.6	2.847341338	1.7	-7	0.5	5.44	55.7	151.6	10.7	7.462686567	3.571428571	6.892857143
480	0	242	0	2	M	75	9	1	4.27	2.89	8.7	89.6	188	0	3.48	0.51	0.23	0.03	0.02	17.6	0.09	0.0162	23.3	2.990264256	1.7	-7	0.7	5.62	54.5	152		6.698564593	1.960784314	6.823529412
481	0	243	1	8	M	61	15	1	12.01	4.3	13	91.6	604	0	9.53	1.32	0.98	0.1	0.08	24.2	0.32	0.0443	26.5	2.222704109	1	-4.4	0.6	13.43	47	149.5	11.4	0.904977376	6.060606061	7.21969697
482	0	243	0	9	M	61	16	1	11.6	3.81	11.6	96.1	453	0	9.64	1.01	0.7	0.19	0.06	27.7	0.28	0.037	26	1.787143238	0.8	-4.5	1.4	8.10	52.3	152.5	12.9	3.59375	4.95049505	9.544554455
483	0	243	0	9	M	61	16	1	11.79	3.9	11.7	96.4	446	0	10.26	0.66	0.66	0.16	0.05	25.8	0.17	0.0296	24.8	2.273389682	0.8	-5	2.4	10.14	49.7	153.7	12.1	1.492537313	7.575757576	15.54545455
484	0	243	0	10	M	61	17	1	9.89	3.73	11.3	96.2	414	0	8.24	0.67	0.65	0.26	0.07	43.3	0.29	0.0336	24.1	2.071843792	0.8	-5.7	2.8	8.58	53.2	154.8	14.9	4.071661238	5.970149254	12.29850746
485	0	243	0	11	M	61	18	1	12.37	3.82	11.5	95	437	0	10.89	0.56	0.72	0.12	0.08	30.4	0.17	0.0351	25.3	1.829178345	1	-4.8	1.8	7.99	52.3	158.6	19.6	2.321981424	7.142857143	19.44642857
486	0	244	1	2	M	60	14	0	5.89	5.06	15.4	88.3	253	0	4.15	1.02	0.68	0.02	0.02	3.9	0.04	0.0385	29.7	7.345828295	1.5	-1.9	0.2	18.58	52.3	153.5	12.7	3.894080997	5.882352941	4.068627451
487	0	244	0	6	M	60	18	0	4.86	5.02	15.2	86.9	358	0	2.53	1.37	0.67	0.26	0.03	4.4	0.06	0.0668	31.9	5.182101977	1.7	0.6	0.2	18.55	53.1	149.4	9.5	0.661157025	2.189781022	1.846715328
488	0	245	1	2	M	58	16	1	20.48	4.18	12.7	92.1	226	0.02	18.61	0.92	0.76	0.15	0.04	71.7	0.66	0.0995	26.3	4.938271605	1	-4.5	0.8	11.16	51.9	144.4	10.9	3.768115942	4.347826087	20.22826087
489	0	246	1	0	M	67	11	0	6.76	4.43	13.7	91.9	219	0	5.7	0.66	0.38	0	0.02	7.6	0.05	0.0173	30.2	2.693498452	0.9	-1.1	0.4	5.90	51.8	161.6	13.6	4.093567251	7.575757576	8.636363636
490	0	246	0	2	M	67	13	0	6.25	3.9	12.1	94.9	254	0	5.05	0.75	0.37	0.06	0.02	5.3	0.04	0.0183	31.7	2.660874287	0.7	0.1	0.4	6.76	54.4	161.5	17.3	2.694610778	12	6.733333333
491	0	247	1	2	M	76	12	0	5.67	3.56	11	92.1	284	0	4.72	0.4	0.51	0.03	0.01	37.5	0.15	0.0157	30.6	2.752293578	1.2	-1.1	0.3	7.82	54.2	153.9	27.5	3.614457831	12.5	11.8
492	0	247	0	4	M	76	14	0	7.25	3.44	10.5	93.9	388	0.01	5.93	0.51	0.72	0.07	0.02	29.4	0.15	0.0182	30.9	1.650451703	1	-0.6	0.5	6.40	53	152.1	27.5	0.607902736	11.76470588	11.62745098
493	0	247	0	5	M	76	15	0	7.25	3.18	9.9	94.7	408	0.01	5.77	0.66	0.7	0.1	0.02	22.7	0.15	0.0219	32.5	2.498742244	1	0.9	0.4	10.19	50.9	151.5	27.3	1.215805471	12.12121212	8.742424242
494	0	247	0	6	M	76	16	0	7.49	3.23	9.9	94.4	428	0	5.93	0.7	0.77	0.07	0.02	25.7	0.18	0.0262	33.4	1.833872708	1	1.9	0.5	7.85	52.5	152.1	28.6	0.70323488	10	8.471428571
495	0	248	1	1	M	53	8	0	4.35	4.22	13.7	96.9	150	0.01	2.83	1.29	0.22	0	0.01	3.1	0.04	0.0367	33	1.977011494	0.6	-0.1	0.2	2.97	51.4	156.9	8.5	5.102040816	1.550387597	2.19379845
496	0	248	0	2	M	53	9	0	4.61	4.22	13.8	96	175	0	3.49	0.9	0.21	0	0.01	2.2	0.02	0.0295	32.1	1.884740848	0.6	-0.9	0.2	3.30	51.2	154.9		8.24742268	5.555555556	3.877777778
497	0	248	0	3	M	53	10	0	5.27	3.91	12.8	96.2	188	0	4.12	0.87	0.27	0	0.01	3.4	0.03	0.0231	31.4	2.450331126	0.6	-1.6	0.2	4.61	51.6	154.6		2.916666667	4.597701149	4.735632184
498	0	248	0	4	M	53	11	0	5.73	3.84	12.5	95.8	230	0.01	4.45	0.96	0.31	0	0.01	7.3	0.07	0.0227	31.3	2.793982192	0.6	-1.8	0.2	6.43	53.4	151.4		5.090909091	6.25	4.635416667
499	0	249	1	2	M	56	9	1	14.18	4.45	13.7	90.6	294	0	13.16	0.65	0.33	0.02	0.02	36.9	0.24	0.0303	28.6	4.887054735	0.9	-2.8	0.5	14.37	56.3	149.3		15.46052632	16.92307692	20.24615385
500	0	249	0	3	M	56	10	1	8.42	3.91	12	93.1	329	0	7.71	0.5	0.1	0.09	0.02	14.0	0.07	0.0242	27.8	5.183910518	0.7	-3.3	0.7	17.06	55.8	150.8	28	20.68965517	18	15.42
501	0	249	0	3	M	56	10	1	8.24	3.81	11.6	92.9	282	0	7.27	0.69	0.14	0.12	0.02	11.6	0.08	0.0191	26.9	5.301602262	0.7	-4.2	0.5	14.95	54.6	151.3	27.5	17.74193548	21.73913043	10.53623188
502	0	249	0	4	M	56	11	1	4.98	2.83	8.8	96.1	183	0.01	4.37	0.4	0.09	0.1	0.02	20.0	0.08	0.0127	25.7	6.514206514	0.5	-4.9	1.5	11.92	59	150.7		32.09876543	15	10.925
503	0	249	0	4	M	56	11	1	5.75	3.34	10.4	94.9	210	0	5.03	0.44	0.11	0.15	0.02	15.9	0.07	0.0167	26.4	6.232294618	0.5	-4.3	1.5	13.09	58.4	150.5		25	15.90909091	11.43181818
504	0	249	0	4	M	56	11	1	7.02	3.82	11.7	93.5	232	0	6.29	0.39	0.15	0.17	0.02	23.1	0.09	0.0176	26.5	6.289129197	0.6	-4.1	1.3	14.59	56.6	150.9	23.1	14.39393939	17.94871795	16.12820513
505	0	249	0	5	M	56	12	1	7.23	3.8	11.7	93.9	228	0	6.28	0.52	0.25	0.15	0.03	21.2	0.11	0.0209	23.4	7.812041116	0.6	-7.2	1.5	17.81	61.9	154		20.96069869	13.46153846	12.07692308
506	0	249	0	6	M	56	13	1	7.39	3.5	10.7	94.9	174	0.01	6.25	0.65	0.24	0.22	0.03	23.1	0.15	0.0161	23.5	9.534706331	0.7	-6.9	1.8	16.59	60.9	155.3		10.90909091	9.230769231	9.615384615
507	0	249	0	7	M	56	14	1	7.99	3.18	9.8	96.2	162	0.01	6.43	0.75	0.52	0.25	0.04	24.0	0.18	0.02	22.1	10.20408163	0.6	-8.5	1.2	16.53	57.3	157.3	25.3	6.25	10.66666667	8.573333333
508	0	250	1	2	F	71	9	0	7.02	5.1	14.1	86.7	209	0	5.15	1.14	0.71	0.01	0.01	7.0	0.08	0.0148	25.1	2.169390788	3	-2.5	1.6	4.53	56.1	153.3	7.9	1.76565008	3.50877193	4.51754386
509	0	250	0	5	F	71	12	0	11.31	5.16	14.2	87.4	357	0	9.02	1.41	0.75	0.08	0.05	21.3	0.3	0.0227	27.2	1.097631427	2.8	-0.8	1	3.92	56	149.6	17.7	1.041666667	7.80141844	6.397163121
510	0	250	0	6	F	71	13	0	11.63	4.8	13.2	88.3	397	0	8.72	1.76	0.98	0.12	0.05	21.6	0.38	0.0245	27.1	1.061608075	2.6	-0.1	2.2	4.21	57.3	149	19.9	1.021566402	7.386363636	4.954545455
511	0	251	1	2	M	66	9	0	5.39	4.49	13.2	90.9	451	0	3.13	1.14	1.09	0.01	0.02	1.8	0.02	0.0287	25.8	1.96485623	1.2	-3.8	1.6	8.86	50.6	156.9	7.9	0.099800399	2.631578947	2.745614035
512	0	251	0	3	M	66	10	0	4.34	4.72	13.6	91.1	458	0	1.44	1.83	0.99	0.04	0.04	1.1	0.02	0.0326	27.4	2.019159912	1.3	-2.4	1.3	9.25	50.8	154.3	8.2	1.202185792	2.18579235	0.786885246
513	0	251	0	5	M	66	12	0	2.79	4.82	14	89.8	460	0	0.55	1.44	0.74	0.03	0.03	0.7	0.01	0.0188	29.9	1.210616173	1.5	0.3	1.4	5.57	49.7	154	12.5	1.376146789	5.555555556	0.381944444
514	0	252	1	7	M	48	18	1	10.92	4.39	12.9	86.3	313	0	8.46	1.29	0.94	0.19	0.04	9.3	0.12	0.0479	32.5	3.847798204	2.9	2.9	0.9	12.04	51.5	154.9	14	1.038062284	3.100775194	6.558139535
515	0	252	0	8	M	48	19	1	10.05	4.45	13	87.9	326	0	7.89	1.08	0.87	0.17	0.04	10.2	0.11	0.0494	30.9	4.069896041	2.3	1	0.6	13.27	52	156.5	14.8	0.501253133	3.703703704	7.305555556
516	0	252	0	9	M	48	20	1	9.22	4.24	12.5	88	300	0	6.65	1.25	1.08	0.19	0.05	3.2	0.04	0.053	28.4	4.256871807	2.1	-1.3	0.6	12.77	50.6	157.3	13.6	0.630914826	4.8	5.32
517	0	252	0	10	M	48	21	1	9.3	4.14	12.1	87.4	294	0	6.59	1.42	1.04	0.2	0.05	7.0	0.1	0.0563	29.4	2.997155983	2.2	-0.2	0.6	8.81	51.6	156.4	14.8	0.841219769	4.929577465	4.64084507
518	0	252	0	11	M	48	22	1	11.63	4.47	13	87.9	298	0	8.35	1.59	1.44	0.19	0.06	8.2	0.13	0.0635	29.5	3.019410496	2.2	0.3	0.8	9.00	49.7	157	13.2	0.684931507	2.51572327	5.251572327
519	0	252	0	12	M	48	23	1	13.14	4.53	13.2	90.1	273	0	10.54	1.04	1.4	0.1	0.06	14.4	0.15	0.0625	29	4.687090861	1.7	-0.7	0.3	12.80	49.3	157.3	9.6	0.079051383	1.923076923	10.13461538
520	0	253	1	6	M	71	7	1	5.33	2.93	9.3	90.8	291	0	4.33	0.68	0.24	0.06	0.02	13.2	0.09	0.0167	25.2	5.093138411	2	-3.7	1.9	14.82	59.5	148.1	30.9	4.424778761	11.76470588	6.367647059
521	0	253	0	7	M	71	8	1	4.77	3	9	90.7	282	0	3.71	0.73	0.24	0.08	0.01	13.7	0.1	0.0174	23.6	4.136310223	1.8	-5.2	1.8	11.66	57.7	149.8	17.8	1.777777778	5.479452055	5.082191781
522	0	253	0	7	M	71	8	1	5.42	3.1	9	89.7	285	0	4.28	0.81	0.23	0.08	0.02	16.0	0.13	0.0183	22	4.220314735	1.7	-6.8	2.1	12.03	59.6	149.1	16	3.603603604	3.703703704	5.283950617
523	0	253	0	7	M	71	8	1	2.64	1.4	4.1	92.9	127	0	2.14	0.36	0.1	0.04	0	19.4	0.07	0.0073	21.7	6.708975521	1.1	-7	2.2	8.52	60.7	151.1	22.2	4.651162791	2.777777778	5.944444444
524	0	253	0	7	M	71	8	1	5.28	3.06	8.9	89.5	279	0.01	4.3	0.69	0.2	0.08	0.01	40.6	0.28	0.0211	22.6	4.188733751	1.4	-6.2	2	11.69	58.3	149.9	15.9	7.027027027	4.347826087	6.231884058
525	0	253	0	8	M	71	10	1	5.08	2.83	8.3	91.9	274	0.01	3.72	0.86	0.34	0.14	0.02	11.6	0.1	0.0175	20.7	4.545454545	1.5	-7.9	2.4	12.45	57.5	152.5	9.3	0.99009901	3.488372093	4.325581395
526	0	253	0	9	M	71	11	1	5.18	2.89	8.7	92	320	0.01	3.81	0.74	0.4	0.22	0.01	23.0	0.17	0.0176	22.4	3.790983607	1.9	-6.5	2.1	12.13	59.9	154.7	10.8	4.735376045	2.702702703	5.148648649
527	0	254	1	6	F	73	9	1	24.56	3.29	9.1	93.6	265	0.01	22.76	0.32	1.41	0.03	0.04	100.0	0.32	0.0339	19.9	6.990014265	3.7	-4.5	10.3	18.52	46.7	147.1	18.8	0.702576112	6.25	71.125
528	0	255	1	6	F	67	15	0	6.35	2.96	9.6	105.4	185	0	4.81	0.87	0.49	0.15	0.03	36.8	0.32	0.0429	25.2	4.500184434	0.6	-6.3	2.5	8.33	53.5	147.1	26.4	7.191011236	4.597701149	5.528735632
529	0	255	0	7	F	67	16	0	6.99	2.91	9.5	108.2	174	0	5.06	1.13	0.7	0.08	0.02	20.4	0.23	0.0445	25.9	4.433858556	0.4	-5.1	3	7.71	51.3	148.6	20.4	3.93081761	0.884955752	4.477876106
530	0	255	0	8	F	67	17	0	6.44	2.93	9.4	107.8	168	0	4.12	1.55	0.62	0.12	0.03	6.5	0.1	0.0401	27.7	5.844402277	0.6	-3.4	2.8	9.82	52.3	150.4	20	2.083333333	1.290322581	2.658064516
531	0	255	0	9	F	67	18	0	5.94	2.77	9	110.5	142	0	3.56	1.68	0.56	0.11	0.03	4.8	0.08	0.0457	29.1	6.055508831	0.3	-1.6	3.4	8.60	53.2	151.8		4.914933837	0	2.119047619
532	0	255	0	10	F	67	19	0	7.74	2.93	9.6	108.5	149	0	5.41	1.57	0.63	0.11	0.02	2.5	0.04	0.0492	31.2	5.057675244	0.6	0.5	3.3	7.54	51.5	154.5	19.7	2.18579235	0.636942675	3.445859873
533	0	256	1	1	M	68	5	0	3.87	3.78	12	95.5	100	0	3.33	0.39	0.15	0	0	2.6	0.01	0.0193	28.4	12.39376771	0.5	-3.4	0.1	12.39	51.6	154.1	7.7	19.14893617	5.128205128	8.538461538
534	0	256	0	2	M	68	6	0	3.68	3.9	12.1	95.4	96	0.01	2.97	0.56	0.15	0	0	1.8	0.01	0.0199	28.5	11.53578874	0.6	-3.4	0.1	11.07	52.7	154.8	7.1	18.24817518	1.785714286	5.303571429
535	0	257	1	1	F	78	6	1	12	4.67	12.9	83.5	190	0	10.66	0.8	0.53	0	0.01	20.0	0.16	0.0262	24.8	7.062910073	4.1	-3.7	0.6	13.42	52	162.5	18.8	4.158004158	7.5	13.325
536	0	257	0	3	F	78	8	1	11.09	4.8	13.2	83.3	273	0	9.6	0.72	0.75	0	0.02	20.8	0.15	0.0298	27.7	9.138230191	4.4	-1	0.4	24.95	52	157.9	11.1	4.789550073	5.555555556	13.33333333
537	0	257	0	4	F	78	9	1	11.53	4.84	13.4	83.9	293	0	10.34	0.47	0.71	0	0.01	38.3	0.18	0.0295	29.4	8.580262819	4.5	0.6	0.3	25.14	51.4	154	21.3	2.874432678	14.89361702	22
538	0	257	0	5	F	78	10	1	12.25	5	13.7	86.2	360	0.01	10.93	0.58	0.72	0	0.02	55.2	0.32	0.035	28.8	8.763206961	3.4	0.3	0.6	31.55	52	152.8	29.3	2.91858679	24.13793103	18.84482759
539	0	258	1	2	M	52	5	0	5.64	4.43	12.8	85.6	256	0	3.66	1.18	0.67	0.1	0.03	11.0	0.13	0.043	28.9	6.201991465	2.1	-1	0.1	15.88	50.5	155.5	12.7	0.838926174	6.779661017	3.101694915
540	0	258	0	3	M	52	6	0	7.28	4.66	13.4	86.9	328	0.01	5.18	1.24	0.73	0.11	0.02	7.3	0.09	0.0349	29.1	4.4814895	1.7	-0.3	0.4	14.70	50.1	158.3	8.1	0.936037441	4.838709677	4.177419355
541	0	259	1	7	M	74	13	0	7.47	3.82	10.9	88	345	0	5.66	1.23	0.46	0.09	0.03	7.3	0.09	0.0378	25.5	3.881807648	1.7	-3.6	1.2	13.39	56.3	160.5	15.4	4.439252336	7.317073171	4.601626016
542	0	259	0	8	M	74	14	0	7.34	3.77	10.8	87.3	367	0	5.53	1.31	0.42	0.05	0.03	6.1	0.08	0.0528	26.5	4.402040431	2	-2.4	1.7	16.16	57.3	160.5	16.8	6.824146982	7.633587786	4.221374046
543	0	260	1	0	F	79	3	1	6.79	4.8	12.1	78.5	298	0	5.36	0.67	0.75	0	0.01	6.0	0.04	0.0346	24	6.166495375	9.9	-2.4	0.5	18.38	47	152.2	17.9	0.73964497	2.985074627	8
544	0	260	0	2	F	79	5	1	10.55	4.68	11.8	78	330	0	8.98	0.68	0.85	0.02	0.02	23.5	0.16	0.037	24.6	5.692684012	11.1	-1.7	1	18.79	49.9	149.2	20.6	1.308900524	2.941176471	13.20588235
545	0	260	0	4	F	79	7	1	5.54	4.65	11.8	78.7	354	0	4.43	0.58	0.39	0.12	0.02	29.3	0.17	0.0511	23.3	4.210956664	9.9	-2.9	1.1	14.91	48.4	147.8	17.2	0.289017341	5.172413793	7.637931034
546	0	260	0	5	F	79	8	1	6.42	4.52	11.4	79	308	0	5.2	0.48	0.5	0.22	0.02	41.7	0.2	0.0615	25.1	3.979659518	9.8	-1.2	1.1	12.26	50.5	146.5	22.9	1.059322034	8.333333333	10.83333333
547	0	260	0	6	F	79	9	1	9.59	4.61	11.6	78.1	257	0.01	7.77	0.82	0.56	0.4	0.04	43.9	0.36	0.0756	27.5	3.192612137	10.6	1.2	0.9	8.21	49.2	147.4	17.1	0.387596899	6.097560976	9.475609756
548	0	261	1	6	M	43	13	1	6.77	4.23	10.4	75.4	275	0	5.53	0.78	0.38	0.07	0.01	34.6	0.27	0.022	22.1	6.625577812	13.9	-2	2.1	18.22	56.2	147		6.086956522	12.82051282	7.08974359
549	0	261	0	7	M	43	14	1	6.62	4.01	9.8	76.1	296	0	5.07	0.94	0.5	0.09	0.02	43.6	0.41	0.0144	21.2	7.156673114	12.7	-2.3	3.6	21.18	57.9	149		16.52360515	17.0212766	5.393617021
550	0	261	0	8	M	43	15	1	8.05	3.99	9.7	76.4	312	0	6.07	1.21	0.62	0.14	0.01	39.7	0.48	0.0124	21.1	6.939040208	12.3	-2.3	3.6	21.65	53.7	148.5		6.398537477	13.2231405	5.016528926
551	0	261	0	9	M	43	16	1	9.48	3.75	8.7	76.3	283	0	7.85	0.88	0.65	0.08	0.02	61.4	0.54	0.0135	20.1	7.809762203	12.1	-3.1	4.1	22.10	53.9	147.4	23.9	5.843071786	6.818181818	8.920454545
552	0	261	0	11	M	43	18	1	8.8	3.72	8.7	76.1	322	0.01	7.08	0.91	0.65	0.14	0.02	44.0	0.4	0.0134	21.5	7.942395811	12.4	-1.5	4.2	25.57	51.4	150.5	24.2	3.878583474	6.593406593	7.78021978
553	0	261	0	12	M	43	19	1	8.94	3.32	7.8	78.3	300	0	7.11	1.03	0.63	0.16	0.01	27.2	0.28	0.011	20.7	8.194829178	9.9	-2.1	4.6	24.58	53.1	152.1	21.4	2.397260274	5.825242718	6.902912621
554	0	261	0	12	M	43	19	1	8.82	3.29	7.6	78.1	297	0	7.27	0.85	0.51	0.17	0.02	40.0	0.34	0.0112	20.6	7.211651398	9.9	-2	5.2	21.42	52.4	151.5	27.1	4.149377593	7.058823529	8.552941176
555	0	262	1	2	M	74	5	0	2.71	4.08	12.3	89.2	144	0	1.99	0.52	0.2	0	0	3.8	0.02	0.0171	30.8	3.91164289	1.8	-0.1	0.2	5.63	54	156.2		19.33701657	3.846153846	3.826923077
556	0	262	0	4	M	74	7	0	3.74	4.13	12.5	88.9	199	0	3.02	0.39	0.32	0.01	0	10.3	0.04	0.0165	31.9	4.216444132	1.8	1	0.3	8.39	53.1	154		11.53846154	5.128205128	7.743589744
557	0	262	0	5	M	74	8	0	4.11	4.02	12.1	88.3	228	0	3.12	0.61	0.34	0.03	0.01	8.2	0.05	0.0177	31.1	4.365838113	1.9	0.2	0.3	9.95	52.2	151.4		13.1147541	8.196721311	5.114754098
558	0	262	0	6	M	74	9	0	5.16	4.05	12.3	88.1	265	0	4.08	0.59	0.42	0.06	0.01	13.6	0.08	0.0255	30.4	4.131130064	1.9	-0.7	0.2	10.95	50.5	150.5	16.9	6.25	8.474576271	6.915254237
559	0	262	0	7	M	74	10	0	6.54	4.35	12.9	88	354	0.01	5.08	0.82	0.46	0.16	0.02	25.6	0.21	0.0405	29	4.295328583	2	-1.9	0.2	15.21	49.2	149.5	28	4.358353511	17.07317073	6.195121951
560	0	263	1	7	F	77	4	0	5.12	3.93	10.7	84.2	293	0	3.42	0.97	0.37	0.32	0.04	5.2	0.05	0.0373	24.7	3.980099502	4.6	-2.9	0.7	11.66	56.1	156.5	15.5	3.790087464	2.06185567	3.525773196
561	0	263	0	11	F	77	8	0	4.36	3.88	10.4	84.8	474	0.01	3.06	0.78	0.27	0.2	0.05	6.4	0.05	0.0365	30.1	2.138958548	4.1	3.1	1.9	10.14	51.5	154.9	10.3	0.823045267	0	3.923076923
562	0	263	0	12	F	77	9	0	5.31	3.92	10.4	84.9	431	0.01	3.42	1.23	0.36	0.23	0.07	4.9	0.06	0.0423	32.3	5.217823422	4.2	5.2	1.6	22.49	50.4	152.9	9.8	2.140672783	0.81300813	2.780487805
563	0	264	1	3	F	69	8	0	3.68	4.53	12.9	83.9	148	0	2.35	1.06	0.25	0	0.02	2.8	0.03	0.0258	30.4	4.94276795	3.3	0.9	0.1	7.32	51.3	156.6	9.4	3.111111111	4.716981132	2.216981132
564	0	264	0	4	F	69	9	0	3.8	4.85	13.7	84.1	159	0	2.55	1	0.23	0.01	0.01	5.0	0.05	0.016	31.2	5.016564127	3.1	1.7	0.2	7.98	50.3	157	9	1	3	2.55
565	0	264	0	5	F	69	10	0	4.19	4.82	13.6	84.6	164	0	3.14	0.73	0.31	0.01	0	6.8	0.05	0.014	31.6	5.470459519	2.8	2.2	0.2	8.97	49.8	156.4	9.6	0.704225352	4.109589041	4.301369863
566	0	264	0	7	F	69	12	0	4.51	4.71	13.3	84.5	206	0	2.97	0.94	0.56	0.03	0.01	6.4	0.06	0.0165	31.4	5.316544246	2.8	2.1	0.2	10.95	49.7	158.6	7.4	1	3.191489362	3.159574468
567	0	265	1	0	M	55	5	1	4.35	5.44	15.8	84.7	129	0	3.77	0.46	0.11	0	0.01	2.2	0.01	0.0256	29.5	5.038335159	2.8	-0.8	0.1	6.50	45.9	155.4	6.5	0.99009901	2.173913043	8.195652174
568	0	265	0	1	M	55	6	1	4.17	4.87	14.1	85.4	112	0	3.55	0.51	0.1	0	0.01	3.9	0.02	0.0248	29.2	6.966707768	2.5	-1.1	0.1	7.80	47	154.7	3.9	7.058823529	0	6.960784314
569	0	265	0	2	M	55	7	1	5.3	4.98	14.9	86.1	113	0	4.37	0.81	0.1	0	0.02	4.9	0.04	0.0254	31.2	7.569230769	2.7	0.9	0.2	8.55	48.4	150.5		9.090909091	1.234567901	5.395061728
570	0	266	1	0	M	57	7	1	4.96	3.75	11.7	92	112	0	3.64	0.97	0.33	0	0.02	2.1	0.02				1.2				53.9	158.3	9.3	5.405405405	3.092783505	3.75257732
571	0	266	0	4	M	57	11	1	7.01	2.95	9.3	93.2	153	0	5.96	0.62	0.37	0.05	0.01	6.5	0.04	0.0174	24.2	5.136436597	1.4	-6.2	2.4	7.86	56.5	153.3		20.30769231	6.451612903	9.612903226
572	0	266	0	5	M	57	12	1	6.63	3.01	9.4	93.7	193	0.02	5.43	0.6	0.46	0.13	0.01	16.7	0.1	0.0169	24.4	6.926121372	1.5	-6	2.4	13.37	57.2	151.5	20	20.92457421	5	9.05
573	0	266	0	6	M	57	13	1	5.45	2.78	8.5	93.9	198	0.01	4.16	0.57	0.53	0.19	0	21.1	0.12	0.0156	24.6	5.369551485	1.2	-5.7	2.5	10.63	58.2	152.2		19.83471074	3.50877193	7.298245614
574	0	266	0	7	M	57	14	1	7.46	2.9	8.9	95.5	214	0	5.92	0.56	0.77	0.19	0.02	57.1	0.32	0.0165	23.6	6.298757585	1.4	-6.7	2.9	13.48	59.3	153.3	28.6	15.40740741	5.357142857	10.57142857
575	0	267	1	0	M	66	14	0	5.8	4.68	14.4	88.9	169	0	4.24	1.17	0.36	0.01	0.02	1.7	0.02	0.0257	32.3	5.344098424	1.5	1	0.2	9.03	51.9	159.2	6.8	2.476780186	3.418803419	3.623931624
576	0	267	0	2	M	66	16	0	5.34	4.88	14.8	89.3	215	0	3.41	1.39	0.43	0.09	0.02	2.9	0.04	0.0337	31.2	4.115755627	1.3	-0.1	0.2	8.85	53.5	157.1	9.4	1.542416452	5.035971223	2.45323741
577	0	268	1	2	F	54	9	1	19.47	4.08	12.1	87.5	731	0	17.85	0.9	0.56	0.12	0.04	17.8	0.16	0.053	28.4	2.548500882	1.9	-2.5	0.2	18.63	45	150.5	13.3	3.754940711	4.444444444	19.83333333
578	0	268	0	2	F	54	9	1	16.5	3.32	9.9	87.7	625	0.01	15.33	0.67	0.46	0.03	0.01	23.9	0.16	0.0415	28.2	2.558472554	1.7	-2.6	0.3	15.99	45.6	150.9	14.9	3.791469194	4.47761194	22.88059701
579	0	268	0	3	F	54	10	1	19.53	3.21	9.7	92.5	631	0.01	17.08	1.28	0.69	0.45	0.03	37.5	0.48	0.0533	27.8	3.047351149	1.1	-2.9	0.4	19.23	47.1	148.6	14.8	4.967948718	2.34375	13.34375
580	0	268	0	3	F	54	10	1	19.65	3.24	9.6	92.3	640	0.01	17.05	1.34	0.76	0.46	0.04	36.6	0.49	0.0499	28.1	2.709665108	1.2	-2.7	0.4	17.34	46.8	148.9	13.4	5.217391304	2.23880597	12.7238806
581	0	269	1	4	M	51	10	0	7.29	4.67	14.4	85.9	411	0	3.35	2.42	1.46	0.03	0.03	2.9	0.07	0.2092	30.3	5.653594771	4.2	0.4	0.1	23.24	50.8	157.9	6.2	0.223546945	0.41322314	1.384297521
582	0	270	1	3	M	79	13	1	13.31	3.87	11.8	91.5	250	0.01	11.83	0.42	0.88	0.16	0.02	42.9	0.18	0.0313	26.3	4.613297151	1.5	-4.6	0.8	11.53	50.2	147	42.9	4.292929293	19.04761905	28.16666667
583	0	270	0	4	M	79	14	1	7.37	3.77	11.3	92	227	0	6.17	0.32	0.69	0.18	0.01	28.1	0.09	0.0256	25	3.884604399	1.5	-5.7	1.3	8.82	50.1	146.4	25	3.68	9.375	19.28125
584	0	270	0	5	M	79	15	1	5.57	3.57	10.8	91.6	249	0.01	4.63	0.25	0.51	0.17	0.01	68.0	0.17	0.0221	24.9	4.98034076	1.6	-5.3	2.5	12.40	50.5	145	28	6.498951782	8	18.52
585	0	271	1	7	M	75	10	1	9.74	3.72	11.4	96	394	0	8.52	0.31	0.8	0.07	0.04	77.4	0.24	0.0234	26.4	4.686446392	1.1	-4.1	1.6	18.46	53.2	148.9	16.1	1.375515818	3.225806452	27.48387097
586	0	271	0	8	M	75	11	1	10.35	3.45	10.7	97.1	431	0	8.9	0.38	0.91	0.11	0.05	52.6	0.2	0.0169	25.2	4.39748715	1.2	-4.7	2.1	18.95	53.4	150.9	21.1	2.303030303	5.263157895	23.42105263
587	0	271	0	9	M	75	12	1	9.66	3.13	9.8	98.4	405	0.02	8.21	0.46	0.85	0.1	0.04	69.6	0.32	0.0175	25.2	5.778491172	1.2	-4.1	2.6	23.40	53.3	152.4	19.6	2.887139108	2.173913043	17.84782609
588	0	271	0	9	M	75	12	1	9.54	3.09	9.9	98.4	402	0.02	8.03	0.51	0.84	0.1	0.06	39.2	0.2	0.0207	25.6	5.744167337	1.3	-3.7	2.6	23.09	54.4	151.4	19.6	1.424870466	1.960784314	15.74509804
589	0	272	1	0	M	70		0	6.46	3.99	11.7	89.5	208	0	4.91	0.93	0.58	0.02	0.02	3.2	0.03	0.0207	26.1	6.001304631	2.1	-3.1	1.3	12.48	47.1	157.8	2.2	0.753295669	1.075268817	5.279569892
590	0	272	0	2	M	70		0	6.8	3.75	10.8	91.2	191	0	5.72	0.58	0.48	0	0.02	13.8	0.08	0.0203	25.1	4.828411812	1.4	-4.3	0.7	9.22	53.4	155.6	8.6	5.973451327	3.448275862	9.862068966
591	0	272	0	5	M	70		0	5.5	3.5	10.3	91.7	256	0	3.82	0.84	0.68	0.12	0.04	9.5	0.08	0.0175	26.8	5.456539622	1.4	-2.5	0.9	13.97	51.6	151.5	20.2	2.208201893	13.0952381	4.547619048
592	0	273	1	0	M	83	14	0	7.17	5.2	15.8	95	212	0	5.82	0.84	0.49	0	0.02	3.6	0.03				1.3				48.4	150.6		3.125	20.23809524	6.928571429
593	0	274	1	1	M	54	7	0	5.72	4.75	13.7	84.2	116	0	4.98	0.46	0.27	0	0.01	8.7	0.04	0.0157	31.8	9.726636999	2.3	1.9	0.2	11.28	51	160.1	4.3	3.305785124	2.173913043	10.82608696
594	0	274	0	3	M	54	9	0	6.7	4.66	13.3	84.8	170	0	6.2	0.31	0.18	0.01	0	12.9	0.04	0.0149	31.9	4.945717732	2.3	2.1	0.2	8.41	48.1	156.5	9.7	8.928571429	3.225806452	20
595	0	274	0	4	M	54	10	0	6.86	4.29	12.1	86	198	0	6.18	0.44	0.2	0.03	0.01	31.8	0.14	0.012	30.7	5.219605347	2	1.2	0.5	10.33	52	154.1	6.8	11.66666667	2.272727273	14.04545455
596	0	275	1	2	M	86	7	1	4.41	3.92	12.4	98	140	0	3.73	0.45	0.23	0	0	20.0	0.09	0.0165	29.8	5.905905906	0.7	-2.1	0.8	8.27	55.6	152.1		11.31221719	6.666666667	8.288888889
597	0	275	0	3	M	86	8	1	5.75	4.11	12.9	97.1	152	0.01	4.89	0.62	0.23	0.01	0	22.6	0.14	0.0201	31.2	7.078507079	0.8	-0.8	0.7	10.76	54.4	151.1		11.70731707	6.451612903	7.887096774
598	0	275	0	4	M	86	9	1	4.27	3.81	12	96.3	163	0.01	3.61	0.42	0.23	0	0.01	33.3	0.14	0.0187	31.8	7.070707071	0.8	-0.3	0.7	11.53	53.3	150.2	16.7	11.32075472	9.523809524	8.595238095
599	0	275	0	5	M	86	10	1	7.97	3.77	11.8	96.6	204	0.01	7.03	0.59	0.34	0	0.01	28.8	0.17	0.0196	31.2	6.046814044	1	-0.8	0.6	12.34	53.3	148.6	20.3	3.921568627	15.25423729	11.91525424
600	0	275	0	6	M	86	11	1	10.21	3.77	11.8	97.6	199	0.01	9.34	0.48	0.36	0.02	0.01	45.8	0.22	0.0226	31.9	5.648469549	0.8	0.2	1.3	11.24	53.4	147.9	29.2	1.529051988	20.83333333	19.45833333
601	0	275	0	7	M	86	12	1	13.29	3.89	12.3	98.2	209	0	12.23	0.49	0.54	0.01	0.02	36.7	0.18	0.0237	33.5	5.255209906	0.8	1.6	1	10.98	55.3	148.2	26.5	1.458333333	22.44897959	24.95918367
602	0	276	1	6	F	53	10	0	4.04	4.61	13.8	92.2	181	0	2.72	1.04	0.27	0	0.01	3.8	0.04	0.035	29.5	3.322658127	1.6	-1.4	0.1	6.01	51.3	158.4	8.7	1.19047619	2.884615385	2.615384615
603	0	276	0	8	F	53	12	0	4.28	3.32	9.9	95.8	105	0.01	3.2	0.89	0.18	0	0.01	4.5	0.04	0.0136	28.3	13.82716049	1.1	-2.2	0.2	14.52	52.6	155.5	7.9	3.184713376	3.370786517	3.595505618
604	0	276	0	9	F	53	13	0	3.98	3.86	11.4	94	213	0	2.91	0.77	0.28	0.01	0.01	3.9	0.03	0.0158	30.5	6.773560209	1.5	0	0.3	14.43	56.8	157.9	11.7	4.780876494	6.493506494	3.779220779
605	0	277	1	2	F	62	16	0	6.28	3.65	10.1	85.5	398	0.01	4.77	1.15	0.35	0	0.01	7.8	0.09	0.0237	26.3	2.661659046	3.1	-2.3	0.4	10.59	50.2	154.2	12.2	2.830188679	2.608695652	4.147826087
606	0	277	0	4	F	62	18	0	6.95	3.82	10.6	84.8	549	0	4.93	1.32	0.57	0.11	0.02	10.6	0.14	0.0233	27.2	1.736915239	3.4	-1.4	0.5	9.54	50.3	153.6	16.7	3.396226415	3.787878788	3.734848485
607	0	277	0	6	F	62	20	0	7.25	3.8	10.4	85.3	672	0	4.41	1.83	0.81	0.15	0.05	20.2	0.37	0.0315	28.4	1.291495265	3.3	0	0.6	8.68	49.2	152.9	16.9	1.075268817	2.732240437	2.409836066
608	0	277	0	7	F	62	21	0	7.61	3.82	10.4	87.4	727	0	4.38	2.11	0.87	0.2	0.05	18.5	0.39	0.0588	29.4	1.419824297	2.6	1.4	1.3	10.32	48.7	150.8	18	1.254705144	1.895734597	2.075829384
609	0	278	1	2	F	69	9	0	5.99	3.24	10	93.8	279	0.01	4	0.85	1.1	0.02	0.02	3.5	0.03	0.0149	29.2	2.829313544	0.7	-2.5	0.3	7.89	47	155.2		2.259332024	3.529411765	4.705882353
610	0	278	0	3	F	69	10	0	6.4	3.68	11.4	93.5	244	0.01	4.67	0.67	0.93	0.11	0.02	6.0	0.04	0.0195	28.3	6.960426607	0.8	-3.1	0.4	16.98	45.7	150	10.4	1.183431953	2.985074627	6.970149254
611	0	278	0	4	F	69	11	0	6.48	3.79	11.6	92.3	307	0	5.05	0.63	0.67	0.11	0.02	12.7	0.08	0.0231	29.8	2.927781392	0.8	-1.5	0.6	8.99	47.9	150.6	12.7	0.818330606	4.761904762	8.015873016
612	0	279	1	0	M	77	1	0	5.17	3.58	11.9	93.3	110	0	3.31	1.64	0.19	0.02	0.01	1.8	0.03				1.1				46.6	149.8		14.28571429	3.048780488	2.018292683
613	0	279	0	2	M	77	3	0	5.1	3.23	10.6	93.2	112	0	3.66	1.16	0.16	0.11	0.01	3.4	0.04				1.2				50.6	145.5		23.57142857	2.586206897	3.155172414
614	0	279	0	6	M	77	7	0	9.73	3.46	11.3	92.5	247	0.01	7.61	1.73	0.22	0.16	0.01	17.9	0.31	0.0208	29.4	4.193175246	1.6	-3.5	0.4	10.36	54.2	149.6	6.4	19.80676329	1.734104046	4.398843931
615	0	279	0	9	M	77	10	0	6.77	3.13	10.1	88.5	237	0.02	5.53	0.92	0.15	0.16	0.01	15.2	0.14	0.0466	27.1	2.67324163	2.2	-5.3	0.2	6.34	60.7	157.5	14.1	19.42446043	4.347826087	6.010869565
616	0	280	1	0	M	72	10	0	6.29	4.92	14.8	88.4	146	0	5.34	0.64	0.3	0	0.01	6.3	0.04	0.0212	28.9	5.658536585	1.7	-2	0.2	8.26	49.4	153.4	7.8	0.74906367	4.6875	8.34375
617	0	281	1	16	F	77		1	8.94	3.05	9	88.5	420	0.01	7.29	0.89	0.67	0	0.09	56.2	0.5	0.0296	22.3	5.674433349	2.9	-6.6	2.4	23.83	58.6	158.1	12.4	1.125401929	1.123595506	8.191011236
618	0	282	1	5	M	87	10	0	7.66	3.76	10.9	86.7	301	0	5.16	1.5	0.85	0.13	0.02	6.7	0.1	0.0564	28.2	4.654346338	2	-1.3	0.9	14.01	50	151.9	17.3	1.423027167	5.333333333	3.44
619	0	283	1	1	M	66	19	1	6.54	4.11	11.8	86.4	199	0	4.7	1.11	0.7	0.02	0.01	5.4	0.06	0.0279	26.8	6.140963015	2.4	-2.8	0.7	12.22	52.6	153.7	11.7	0.483870968	4.504504505	4.234234234
620	0	284	1	4	F	82	11	0	7.61	4.07	12.7	89.2	286	0.01	5.22	1.65	0.69	0.02	0.03	8.5	0.14	0.0338	29.5	3.743743744	1.2	-2.4	0.1	10.71	47.5	153.9	9.1	1.121794872	4.848484848	3.163636364
621	0	284	0	5	F	82	12	0	7.65	4.09	12.6	88.5	330	0	5.31	1.59	0.69	0.02	0.04	17.6	0.28	0.0446	30.8	3.317823184	1.2	-1.1	0.1	10.95	49.3	151.4	11.3	1.147540984	4.402515723	3.339622642
622	0	284	0	6	F	82	13	0	7.25	4.01	12.5	88.5	348	0	4.61	1.69	0.84	0.05	0.06	21.3	0.36	0.0445	31.9	3.471837488	1.2	0	0.1	12.08	47.4	150.8	8.9	1.19205298	3.550295858	2.727810651
623	0	284	0	7	F	82	14	0	10.25	4.16	12.9	89.4	434	0	7.09	1.87	1.1	0.1	0.09	27.8	0.52	0.0666	33.1	3.904045155	1.1	1.2	0.1	16.94	46.3	150.2	9.6	0.599400599	2.673796791	3.79144385
624	0	285	1	1	M	78	11	0	6.29	3.97	11.6	89.2	323	0	4.76	1.21	0.31	0	0.01	2.5	0.03	0.023	26.2	2.946954813	1.5	-3.9	0.6	9.52	50.1	151.5	9.1	5.514705882	3.305785124	3.933884298
625	0	285	0	3	M	78	13	0	4.63	3.79	11.1	88.1	340	0	2.56	1.41	0.57	0.07	0.02	2.8	0.04	0.0246	28.1	2.373142967	1.7	-2.2	0.4	8.07	56.2	152.6	13.5	2.504816956	4.964539007	1.815602837
626	0	285	0	4	M	78	14	0	4.88	3.87	11.3	87.3	398	0	2.76	1.44	0.6	0.06	0.02	4.9	0.07	0.0236	29.2	2.587276271	1.7	-1.1	0.5	10.30	53.3	151.2	13.9	1.672862454	4.861111111	1.916666667
627	0	286	1	0	F	69	10	0	5.02	5.01	14	85.8	200	0	2.95	1.42	0.62	0.01	0.02	6.3	0.09	0.0306	30	2.867256637	2.5	1.1	0.3	5.73	50.8	152	10.6	1.221640489	4.225352113	2.077464789
628	0	286	0	2	F	69	12	0	7.98	4.34	12	86.9	219	0.01	5.82	1.23	0.87	0.04	0.02	8.9	0.11	0.0252	28.6	2.423263328	2.3	-0.2	0.2	5.31	49.3	149.9	17.1	1.162790698	10.56910569	4.731707317
629	0	286	0	3	F	69	13	0	6.18	4.23	11.7	88.2	240	0	3.47	1.67	0.88	0.13	0.03	6.0	0.1	0.0283	29.5	3.716608595	2	0.7	0.2	8.92	49.6	146.1	12.6	1.684717208	7.185628743	2.077844311
630	0	286	0	5	F	69	15	0	6.05	4.25	11.8	84.7	319	0	3.87	1.3	0.8	0.05	0.03	9.2	0.12	0.031	30	1.625514403	2.6	1	0.2	5.19	51.3	145.5	14.6	1.089918256	4.615384615	2.976923077
631	0	287	1	4	M	77	8	0	5.74	5.25	15.3	85.9	137	0	4.68	0.71	0.34	0	0.01	7.0	0.05	0.0273	28	6.98510529	2.4	-2.3	0.1	9.57	48.4	159.8	4.2	1.602564103	1.408450704	6.591549296
632	0	287	0	6	M	77	10	0	4.3	5.28	15.3	82	170	0	2.99	0.82	0.48	0	0.01	9.8	0.08	0.0385	29.3	7.345360825	3.7	-1	0.1	12.49	49.8	156.4		1.33037694	2.43902439	3.646341463
633	0	288	1	7	M	66	15	1	8.95	2.73	8.2	90.1	273	0.31	7.01	1.12	0.56	0.24	0.02	68.8	0.77	0.0456	25.4	4.546467573	1.9	-3.9	2.1	12.41	55.5	154.8	6.3	1.192842942	0.892857143	6.258928571
634	0	288	0	8	M	66	16	1	10.88	2.67	7.9	90.3	298	0.53	8.93	1.06	0.61	0.23	0.05	119.8	1.27	0.0513	26	4.703270085	2.2	-3.3	2.1	14.02	58.3	154.4	11.3	2.568807339	1.886792453	8.424528302
635	0	288	0	8	M	66	16	1	10.88	2.65	7.9	90.2	296	0.52	9.05	1.04	0.51	0.23	0.05	123.1	1.28	0.0509	25.1	4.035412806	2.1	-4.3	2.2	11.94	59.3	153.9	13.5	2.78372591	2.884615385	8.701923077
636	0	288	0	9	M	66	17	1	16.83	2.98	8.8	90.3	312	0.68	14.45	1.21	0.88	0.23	0.06	220.7	2.67	0.0799	27.4	3.608562691	2.2	-2.1	1.5	11.26	57.3	157.5	12.4	0.508905852	2.479338843	11.94214876
637	0	288	0	9	M	66	17	1	16.6	2.99	8.7	90.6	320	0.67	14.09	1.25	0.98	0.21	0.07	194.4	2.43	0.0819	27.8	3.880883766	2.2	-1.8	1.4	12.42	58.3	156.5	11.2	1.573033708	0.8	11.272
638	0	288	0	9	M	66	17	1	16.5	2.97	8.8	90.6	305	0.68	14.12	1.24	0.86	0.21	0.07	196.8	2.44	0.0769	27.7	3.313365781	2.1	-2	1.3	10.11	58.4	156.6	12.9	1.01910828	1.612903226	11.38709677
639	0	288	0	9	M	66	17	1	16.52	3.02	8.9	91.1	319	0.82	13.46	1.73	1.01	0.24	0.08	120.2	2.08	0.0885	27.5	3.636006289	2.2	-2	1.7	11.60	56.6	157.8	6.9	0.651465798	1.156069364	7.780346821
640	0	288	0	10	M	66	18	1	16.9	2.99	8.8	91	293	0.9	13.52	1.91	1.18	0.23	0.06	89.5	1.71	0.0939	28.6	3.77318269	2.2	-0.9	1.4	11.06	59.1	160	3.7	3.163950144	0	7.078534031
641	0	288	0	11	M	66	19	1	17.94	2.84	8.4	91.5	321	1.07	14.79	1.84	0.95	0.29	0.07	60.9	1.12	0.1227	29.9	4.366062917	2.5	0.4	1.2	14.02	58.7	161.6		1.425178147	1.086956522	8.038043478
642	0	288	0	11	M	66	19	1	15.18	2.65	7.8	92.1	287	0.84	12.12	1.94	0.87	0.21	0.04	46.4	0.9	0.1296	29.7	4.341285192	2.3	0.2	1.1	12.46	58.6	162.8	7.7	1.016518424	1.546391753	6.24742268
643	0	288	0	11	M	66	19	1	13.05	2.75	8.2	92.4	253	0.6	10.72	1.27	0.8	0.21	0.05	56.7	0.72	0.1298	28.5	3.686635945	2.4	-1.2	1.4	9.33	58.8	163	6.3	1.253481894	1.57480315	8.440944882
644	0	289	1	2	M	75	5	0	6.05	2.48	8.7	114.1	102	0	3.63	0.91	1.45	0.03	0.03	58.2	0.53	0.0117	33.9	18.3713355	0.7	-0.2	0.8	18.74	43.2	133.5	26.4	1.515151515	14.28571429	3.989010989
645	0	290	1	2	F	84	9	0	8.4	3.13	9.4	92	259	0.02	7.02	0.39	0.85	0.12	0.02	66.7	0.26	0.041	25	3.378684807	2	-4.9	0.8	8.75	48.7	154.8	38.5	1.773533424	15.38461538	18
646	0	290	0	4	F	84	11	0	8.09	2.93	8.6	92.5	245	0.01	6.62	0.44	0.75	0.25	0.03	40.9	0.18	0.0472	24.9	2.809278351	2	-4.9	1.2	6.88	49.9	151.5	34.1	2.492668622	9.090909091	15.04545455
647	0	290	0	6	F	84	13	0	9.33	3.21	9.6	93.5	234	0.01	7.72	0.44	0.91	0.22	0.04	72.7	0.32	0.0536	26.6	2.83625731	1.7	-3	1.7	6.64	50.1	150.5	25	1.314217443	9.090909091	17.54545455
648	0	291	1	2	M	87	14	0	11.4	3.63	12.5	101.7	258	0	9.54	0.66	1.17	0.02	0.01	21.2	0.14	0.0392	35.2	4.652435687	0.3	0.2	0.2	12.00	44.5	151.7	15.2	0.473036897	4.545454545	14.45454545
649	0	291	0	4	M	87	16	0	10.84	3.51	12.1	101.1	284	0	8.72	0.99	1.1	0.02	0.01	21.2	0.21	0.0512	35.2	3.678440926	0.3	0.3	0.2	10.45	45.5	148.7	15.2	0.397614314	5.050505051	8.808080808
650	0	291	0	6	M	87	18	0	11.55	3.52	12.2	102.3	301	0	9.33	0.95	1.19	0.06	0.02	20.0	0.19	0.0612	37.5	1.592920354	0.3	2.5	0.2	4.79	45.6	149.4	14.7	0.190657769	5.263157895	9.821052632
651	0	292	1	3	M	59	13	1	6.14	4.52	13.7	90.3	185	0.01	4.87	0.86	0.4	0	0.01	7.0	0.06	0.0235	33.4	5.178365938	1.5	2.3	0.2	9.58	47.7	148.5	15.1	4.851752022	8.139534884	5.662790698
652	0	292	0	4	M	59	14	1	9.2	4.46	13.7	91	238	0	7.42	1.08	0.67	0.01	0.02	13.0	0.14	0.0241	33.1	6.347498655	1.3	2	0.2	15.11	45.2	142.8	12	6.393442623	7.407407407	6.87037037
653	0	292	0	5	M	59	15	1	8.22	4.26	12.9	91.3	281	0	6.59	0.98	0.58	0.06	0.01	8.2	0.08	0.0239	33.2	6.637276512	1.3	2.2	0.2	18.65	46.1	144.2	13.3	3.653846154	7.142857143	6.724489796
654	0	293	1	15	M	69		0	8.26	2.74	8.4	90.9	310	0	7.63	0.19	0.44	0	0	84.2	0.16	0.0175	23.8	2.692461109	1.6	-6.8	1.2	8.35	56.1	159.4	21.1	4.926108374	10.52631579	40.15789474
655	0	293	0	17	M	69		0	7.24	3.04	9.2	91.8	424	0	6.47	0.51	0.24	0.01	0.01	25.5	0.13	0.0264	25	3.195398626	1.6	-5.8	0.8	13.55	58.2	155.8	11.8	1.777777778	5.882352941	12.68627451
656	0	294	1	4	F	69	14	0	5.5	3.6	10.3	85.8	103	0	4.63	0.44	0.42	0	0.01	18.2	0.08	0.0342	26.2	10.26814912	4.1	-2.9	0.9	10.58	51.5	155.3	13.6	2.083333333	6.818181818	10.52272727
657	0	294	0	6	F	69	16	0	3.71	3.55	10	85.6	144	0.02	2.88	0.52	0.29	0.01	0.01	13.5	0.07	0.0394	26.5	7.003891051	4.1	-2.7	0.7	10.09	52.8	153.4	13.5	3.0651341	7.692307692	5.538461538
658	0	294	0	7	F	69	17	0	3.52	3.47	9.7	85.3	165	0.03	2.64	0.46	0.39	0.02	0.01	37.0	0.17	0.0434	26.2	7.008760951	4.3	-3	0.7	11.56	53.1	152	15.2	2.298850575	6.52173913	5.739130435
659	0	295	1	25	F	82	19	1	16.89	4	11.4	94.8	143	0.06	15.29	0.61	0.97	0	0.02	44.3	0.27	0.0852	27.9	10.56338028	3	-0.4	1.3	15.11	54.5	157.5	23	2.886836028	13.1147541	25.06557377
660	0	296	1	3	M	74	10	0	5.71	3.73	11.4	90.9	221	0	3.11	1.7	0.78	0.1	0.02	1.2	0.02	0.0108	29	2.1446863	1.4	-2.3	0.4	4.74	50.2	156.7	7.1	1.549295775	1.764705882	1.829411765
661	0	296	0	4	M	74	11	0	6.72	3.64	11.1	91.2	263	0	4.26	1.31	1	0.13	0.02	4.6	0.06	0.0106	30.2	2.180527383	1.5	-1.1	0.5	5.73	51.6	155.4	10.7	0.892857143	2.290076336	3.251908397
662	0	297	1	2	F	55	12	0	4.69	4.63	13.9	91.6	145	0	3.2	1.12	0.34	0.02	0.01	1.8	0.02	0.0245	28.2	3.044496487	0.8	-3.1	0.4	4.41	50.6	157.6	11.6	3.594771242	5.357142857	2.857142857
663	0	297	0	4	F	55	14	0	5.68	4.56	13.9	88.6	186	0	4	1.06	0.55	0.06	0.01	6.6	0.07	0.0333	34.2	4.427767355	1.2	3	0.4	8.24	51.8	155.1	12.3	0.814663951	3.773584906	3.773584906
664	0	298	1	0	M	30	3	0	6.11	5.24	15.9	90.1	148	0.01	3.96	1.61	0.53	0	0.01	1.2	0.02	0.0346	32.8	4.108885465	1.4	2.2	0.2	6.08	50	156.3	9.9	1.298701299	4.347826087	2.459627329
665	0	298	0	2	M	30	5	0	9.35	4.85	14.6	90.7	149	0	7.39	1.56	0.39	0	0.01	6.4	0.1	0.0276	30.9	3.405275779	1.3	0.5	0.4	5.07	51.3	152.9	9.6	3.081232493	3.846153846	4.737179487
666	0	298	0	3	M	30	6	0	9.33	4.66	14	89.3	176	0	7.62	1.25	0.45	0	0.01	3.2	0.04	0.0214	29.7	2.756780791	1.5	-0.8	0.3	4.85	50.9	154.3	12	3.43980344	6.4	6.096
667	0	298	0	4	M	30	7	0	6.25	4.47	13.4	91.1	206	0	4.55	1.27	0.43	0	0	6.3	0.08	0.0201	30.5	3.484848485	1.3	-0.1	0.4	7.18	52.1	151.6	14.2	5.263157895	5.511811024	3.582677165
668	0	298	0	5	M	30	8	0	6.91	4.44	13.3	90.5	234	0	4.8	1.42	0.67	0.01	0.01	2.8	0.04	0.0222	30.6	2.276086314	1.2	0.2	0.4	5.33	50.9	151.3	17.6	3.278688525	9.85915493	3.38028169
669	0	299	1	3	M	58	10	0	7.39	3.56	11	96.1	251	0	5.96	0.8	0.58	0.03	0.02	11.3	0.09	0.0288	26.4	1.347773767	1.2	-4.8	1.3	3.38	50	141.6	16.3	1.890359168	10	7.45
670	0	299	0	5	M	58	12	0	6.52	3.33	10.3	96.1	313	0.01	4.97	0.77	0.62	0.14	0.02	5.2	0.04	0.031	28	1.655629139	1.2	-3.2	1.2	5.18	48.9	142.1	13	1.403508772	3.896103896	6.454545455
671	0	299	0	7	M	58	14	0	8.21	3.11	9.6	94.2	312	0	6.6	0.79	0.58	0.19	0.05	11.4	0.09	0.0538	32.2	1.298938895	1.3	1.4	1.9	4.05	47.2	142.3	15.2	0.770712909	5.063291139	8.35443038
672	0	300	1	2	M	55	10	0	9.74	4.36	13.8	91.5	185	0	9.27	0.17	0.28	0	0.02	52.9	0.09	0.0318	31.3	2.910149145	1.7	-1	0.3	5.38	54.2	155.1	23.5	2.325581395	5.882352941	54.52941176
673	0	300	0	3	M	55	11	0	7.23	4.09	12.9	91.9	192	0.01	6.62	0.28	0.31	0.01	0.01	42.9	0.12	0.0303	32.9	4.794058069	1.6	0.6	0.3	9.20	53.4	153.5	14.3	1.423487544	3.571428571	23.64285714
674	0	300	0	4	M	55	12	0	4.68	4.07	12.8	92.1	209	0.01	4.22	0.15	0.29	0.01	0.01	53.3	0.08	0.0305	32.7	2.472445636	1.6	0.4	0.4	5.17	53.7	152.6	26.7	0.36900369	13.33333333	28.13333333
675	0	300	0	6	M	55	14	0	4.85	4.3	13.5	90.5	286	0	3.89	0.35	0.49	0.09	0.03	28.6	0.1	0.0404	31.7	2.754759239	2	-0.5	0.3	7.88	51.2	151.8	28.6	2.672605791	8.571428571	11.11428571
676	0	301	1	0	M	86	1	0	3.37	4.61	14.9	98	158	0.01	1.57	0.92	0.84	0.01	0.03	5.4	0.05				0.6				49.6	163.4	8.7	2.162162162	1.086956522	1.706521739
677	0	301	0	9	M	86	10	0	2.91	4.67	14.9	93.6	149	0	1.17	1.25	0.43	0.04	0.02	6.4	0.08	0.0191	33.8	3.412192903	0.9	1.3	0.1	5.08	54.1	156.4	13.6	3.846153846	3.2	0.936
678	0	301	0	12	M	86	13	0	3.05	4.36	14	94.5	189	0	1.43	1.14	0.39	0.07	0.02	5.3	0.06	0.0227	35	3.411592076	0.8	2.8	0.3	6.45	57.3	154.5	15.8	4.261363636	3.50877193	1.254385965
679	0	302	1	2	F	93	4	0	8.27	5.16	15.4	90.3	101	0	6.99	0.99	0.28	0	0.01	9.1	0.09	0.0402	30.7	7.604562738	1.4	-0.3	0.1	7.68	46.3	145.1	21.2	5.426356589	3.03030303	7.060606061
680	0	302	0	3	F	93	5	0	9.05	5.34	16	90.6	112	0.01	6.83	1.61	0.59	0	0.02	8.1	0.13	0.0352	30	8.884435538	1.5	-1	0.1	9.95	46.8	143.7	13.7	3.676470588	1.863354037	4.242236025
681	0	302	0	4	F	93	6	0	10.6	5.67	17	90.8	133	0	9	1.28	0.29	0	0.03	15.6	0.2	0.0335	30.7	9.53461975	1.5	-0.3	0.1	12.68	46.5	142.7	10.9	3.358208955	1.5625	7.03125
682	0	303	1	2	F	74	10	0	3.07	3.75	11.6	94.4	201	0.01	2.08	0.74	0.24	0.01	0	5.4	0.04	0.0221	26.4	2.92377306	0.9	-5.3	0.8	5.88	45.6	153.9	6.8	1.395348837	1.351351351	2.810810811
683	0	304	1	2	F	73	14	0	4.53	3.88	11.7	91.5	203	0	3.71	0.55	0.26	0.01	0	5.5	0.03	0.019	29.2	6.595246066	1	-2	0.2	13.39	49.8	144.7		15.89958159	12.72727273	6.745454545
684	0	305	1	3	M	73	3	0	4.03	3.11	10.3	101.9	299	0	2.68	0.84	0.38	0.12	0.01	9.5	0.08				3.5				54	145.7		21.47239264	5.952380952	3.19047619
685	0	305	0	4	M	73	4	0	3.98	3.05	10.1	100.7	349	0	2.33	1.04	0.46	0.13	0.02	6.7	0.07	0.0162	33.4	3.277797899	3.9	0.2	1.5	11.44	53.9	146.3	19.2	8.571428571	9.615384615	2.240384615
686	0	306	1	1	M	57	21	0	8.53	4.2	13.3	91.4	192	0.01	7.31	0.84	0.36	0	0.02	3.6	0.03	0.0407	32.2	4.329461457	0.9	-0.2	0.1	8.31	47.1	151	13.1	1.935483871	9.523809524	8.702380952
687	0	307	1	1	M	84	7	1	10.77	4.77	15.1	90.1	222	0	9.11	0.9	0.71	0.01	0.04	13.3	0.12				0.9				56.5	157.1	7.8	2.575757576	1.111111111	10.12222222
688	0	307	0	3	M	84	9	1	12.37	4.33	13.7	89.8	253	0	11.24	0.59	0.52	0	0.02	30.5	0.18	0.0359	30.8	2.950266929	1.1	-1.6	0.1	7.46	59.1	156.5	8.5	1.851851852	1.694915254	19.05084746
689	0	307	0	4	M	84	10	1	11.85	4.36	14.1	92.4	303	0	10.71	0.6	0.49	0.03	0.02	31.7	0.19	0.0344	32.3	2.428771602	0.9	-0.1	0.1	7.36	60.8	155.7	11.7	2.721088435	3.333333333	17.85
690	0	308	1	1	M	81	5	1	5.37	4.05	14.1	100.2	107	0	4.25	0.7	0.4	0.01	0.01	2.9	0.02	0.0344	33.3	4.581151832	0.2	-1.9	0.1	4.90	49.1	158	4.3	2.150537634	0	6.071428571
691	0	308	0	2	M	81	6	1	7.31	3.81	13.3	98.7	117	0	6.34	0.7	0.26	0	0.01	7.1	0.05	0.0278	32.7	4.254112309	0.3	-2.4	0.1	4.98	51.6	158.6	11.4	13.73390558	1.428571429	9.057142857
692	0	309	1	1	M	87	4	1	9.6	4.26	13.7	97.2	200	0.01	8.33	0.75	0.48	0.02	0.02	21.3	0.16				0.7				49.1	153.8	12	0.943396226	1.333333333	11.10666667
693	0	309	0	2	M	87	5	1	8.25	4.04	13	99	208	0	6.83	0.92	0.46	0.02	0.02	12.0	0.11	0.0259	27.3	3.351158645	0.6	-5.3	0.6	6.97	49.3	156.2	10.9	2.097902098	2.173913043	7.423913043
694	0	309	0	3	M	87	6	1	8.48	4.02	13	100	248	0	7.1	0.81	0.48	0.06	0.03	14.8	0.12				0.6				51.1	154.8	8.6	0.230946882	1.234567901	8.765432099
695	0	309	0	3	M	87	6	1	8.53	4	13	99.8	238	0	7.21	0.76	0.48	0.05	0.03	19.7	0.15	0.024	27.1	2.984146721	0.6	-5.4	0.8	7.10	50.7	154.6	10.5	0.228832952	2.631578947	9.486842105
696	0	309	0	4	M	87	7	1	8.95	3.98	12.8	100.8	280	0.01	7.45	0.84	0.51	0.12	0.03	17.9	0.15	0.0243	26.5	2.366710013	0.5	-5.9	0.9	6.63	51.9	153.5	14.3	0.428265525	2.380952381	8.869047619
697	0	310	1	1	M	57	10	0	7.35	4.88	15.2	90.6	205	0	6.11	0.66	0.55	0.02	0.01	12.1	0.08				1				52.3	157.1		15.01976285	7.575757576	9.257575758
698	0	310	0	3	M	57	12	0	7.06	4.83	15.1	90.5	263	0	5.09	0.95	0.91	0.1	0.01	11.6	0.11	0.0261	31.2	5.610640871	1	-0.9	0.2	14.76	51.3	156.6	28.4	2.322738386	12.63157895	5.357894737
699	0	310	0	4	M	57	13	0	6.06	4.7	14.5	90.9	315	0	3.95	1.03	0.96	0.1	0.02	6.8	0.07	0.031	31.4	5.375325598	1	-0.6	0.3	16.93	51.2	153.7	27.2	2.031602709	11.65048544	3.834951456
700	0	311	1	2	F	86	8	0	7.36	4.13	12.9	94.7	332	0	5.62	0.7	0.99	0.03	0.02	12.9	0.09	0.0306	30.7	2.327044025	1	-1.6	0.1	7.73	51.8	151.2	14.3	3.410341034	4.285714286	8.028571429
701	0	311	0	3	F	86	9	0	7.53	3.94	12.3	94.4	335	0	5.51	0.78	1.18	0.04	0.02	12.8	0.1	0.0268	31	3.051201672	1.1	-1.3	0.1	10.22	52.1	150.3	21.8	2.003816794	10.25641026	7.064102564
702	0	311	0	4	F	86	10	0	7.76	3.96	12.3	95.2	347	0	5.4	1.05	1.23	0.06	0.02	10.5	0.11	0.0305	30.9	2.79177162	1	-1.3	0.2	9.69	53.7	149	19	1.091901729	7.619047619	5.142857143
703	0	312	1	2	F	76	14	0	4.02	2.15	9.7	125.6	184	0	3.34	0.43	0.22	0.02	0.01	32.6	0.14	0.0155	37.2	4.226675016	0	-2.8	1.4	7.78	47.6	139.8	23.3	15.19607843	4.651162791	7.76744186
704	0	312	0	3	F	76	15	0	3.5	2.17	9.8	125.8	200	0	2.85	0.39	0.24	0.01	0.01	12.8	0.05	0.0197	37	4.340783933	0.3	-3	1.4	8.68	47.6	137.8		12.10762332	5.128205128	7.307692308
705	0	313	1	2	F	41	8	0	3.57	4.12	12.8	94.7	116	0	1.95	1.19	0.33	0.08	0.02	0.8	0.01	0.033	29.6	3.653250774	0.4	-2.1	0.05	4.24	51.4	156	8.4	1.360544218	1.680672269	1.638655462
706	0	313	0	3	F	41	9	0	3.61	4.2	13.1	94.5	125	0	1.99	1.19	0.38	0.04	0.01	2.5	0.03	0.0286	30.2	3.409758965	0.4	-1.7	0.1	4.26	54.7	154.6	13.4	4.249291785	2.521008403	1.672268908
707	0	313	0	4	F	41	10	0	3.61	4.31	13.4	94.4	126	0	2.13	1.17	0.28	0.02	0.01	0.9	0.01	0.028	29	2.953337271	0.4	-2.8	0.1	3.72	55.7	155	12	7.984790875	2.564102564	1.820512821
708	0	314	1	2	F	52	14	0	9.93	4.29	12.6	87.6	330	0	6.75	2.17	0.85	0.13	0.03	5.5	0.12	0.0339	30.7	1.895934274	1.4	0.4	0.1	6.26	47.6	152.7	7.4	0.654450262	2.764976959	3.110599078
709	0	314	0	3	F	52	15	0	8.97	4.28	12.5	86.9	393	0	5.85	2.2	0.68	0.21	0.03	5.0	0.11	0.0449	30	1.739283204	1.5	-0.4	0.1	6.84	47	151.3	7.7	1.298701299	2.272727273	2.659090909
710	0	314	0	4	F	52	16	0	8.12	4.1	12	88	431	0	5.15	2.1	0.6	0.23	0.04	3.3	0.07	0.0394	31	1.589751505	1.3	0.9	0.2	6.85	47.2	151.5	11	0.740740741	2.380952381	2.452380952
711	0	315	1	2	M	65	9	1	13.32	4.11	13.1	93.4	220	0.01	11.98	0.87	0.4	0.02	0.05	48.3	0.42	0.0337	33	7.818532819	0.8	0.6	0.2	17.20	52.7	148.2		13.35227273	11.49425287	13.77011494
712	0	316	1	2	F	70	2	0	4	3.59	10.8	92.2	164	0	2.34	1.34	0.31	0	0.01	2.2	0.03	0.0126	32	5.697211155	1.1	0.9	0.2	9.34	53	155		5.172413793	2.23880597	1.746268657
715	0	318	1	1	M	72	3	0	2.84	3.76	11.6	92.3	129	0	1.66	0.97	0.2	0	0.01	2.1	0.02	0.0338	30.4	3.4	0.8	-1.1	0.1	4.40	51.7	155.3	4.1	11.17318436	0	1.711340206
716	0	318	0	2	M	72	4	0	3.25	3.71	11.5	91.4	102	0	2.03	1	0.2	0.01	0.01	1.0	0.01				0.9				47.1	155.2		16.27906977	2	2.03
717	0	318	0	4	M	72	6	0	2.84	3.86	11.9	92.5	86	0.01	2.01	0.7	0.11	0.02	0	7.1	0.05	0.0162	31.3	6.6	0.9	0	0.2	5.70	51	149.4		35.41666667	1.428571429	2.871428571
718	0	318	0	7	M	72	9	0	5.42	3.79	11.5	89.4	166	0.01	4.31	0.91	0.16	0.03	0.01	22.0	0.2	0.0182	31.6	7.3	1.6	0.4	0.2	12.10	55.7	149.2		27.39726027	3.296703297	4.736263736
719	0	318	0	9	M	72	11	0	5.1	3.8	11.7	90.8	195	0.01	3.85	0.9	0.3	0.03	0.02	16.7	0.15				1.4				55.2	154.5	8.9	8.582089552	3.333333333	4.277777778
720	0	319	1	2	M	65	7	1	8.78	3.87	11.2	92.8	299	0.01	7.59	0.39	0.44	0.33	0.03	71.8	0.28	0.0209	26.7	2.9	1.6	-2.5	0.6	8.70	58	145.9	17.9	13.02083333	5.128205128	19.46153846
721	0	319	0	3	M	65	8	1	9.42	3.57	10.3	93.6	261	0.02	8.04	0.47	0.48	0.38	0.05	102.1	0.48	0.0239	24.9	3.9	1.9	-3.8	1.1	10.20	59.3	145.8	25.5	4.205607477	10.63829787	17.10638298
722	0	319	0	4	M	65	9	1	11.05	3.44	9.9	94.5	274	0.02	9.07	0.77	0.85	0.3	0.06	126.0	0.97	0.0182	22.9	3.3	1.6	-5.8	0.9	9.00	60.3	146.4	23.4	5.866302865	10.38961039	11.77922078
723	0	319	0	5	M	65	10	1	12.16	3.52	10.2	93.2	340	0.03	10.05	0.82	0.95	0.26	0.08	167.1	1.37	0.0183	23.4	3.3	1.9	-5.4	0.6	11.20	58.3	148.3	25.6	2.76816609	10.97560976	12.25609756
724	0	319	0	6	M	65	11	1	12.02	3.5	10	94.3	408	0.02	9.67	1	1	0.27	0.08	138.0	1.38	0.021	24	3.1	1.4	-4.8	0.6	12.60	57.4	149.4	22	1.214128035	6	9.67
725	0	319	0	9	M	65	14	1	12.68	3.31	9.5	94.9	639	0.02	10.35	0.92	0.95	0.36	0.1	63.0	0.58	0.0424	23.4	2.8	1.4	-4.9	1.3	17.90	57.5	154.9	13	0.723763571	2.173913043	11.25
726	0	319	0	10	M	65	15	1	11.18	3.33	9.5	96.1	696	0.01	8.9	1.02	0.86	0.32	0.08	41.2	0.42	0.0453	24.2	2.5	1.2	-4.1	1.3	17.40	56.5	154.8	12.7	0.664010624	2.941176471	8.725490196
727	0	319	0	11	M	65	16	1	12.58	3.41	9.7	94.4	779	0.01	10.15	1.11	0.94	0.28	0.1	23.4	0.26	0.0529	25.4	2.2	1.6	-2.9	1.3	17.10	56.7	153.9	12.6	0.841346154	3.603603604	9.144144144
728	0	319	0	12	M	65	17	1	15.6	3.59	10.2	98.9	831	0.01	11.74	1.79	1.68	0.25	0.14	15.1	0.27	0.0628	26.8	2.2	1	-1.1	1.7	18.30	56.7	151.5	10.1	0.612661675	3.351955307	6.558659218
729	0	319	0	13	M	65	18	1	13.71	3.6	10.2	100.6	801	0.03	10.77	1.12	1.61	0.1	0.11	23.2	0.26	0.0644	26.3	2.2	1	-1	2.2	17.60	55.9	150.6	15.2	0.832177531	6.25	9.616071429
730	0	320	1	0	M	63	10	1	10.11	5.18	15	87.1	349	0	9.19	0.49	0.35	0.04	0.04	53.1	0.26	0.058	27.5	6.9	1.6	-2.6	0.2	24.10	53.6	152.1	14.3	1.27388535	8.163265306	18.75510204
731	0	321	1	0	F	48	14	0	12.68	4.15	7.5	66.3	292	0	11.59	0.79	0.27	0	0.03	13.9	0.11	0.0498	18.6	7.1	40.1	0.7	33.4	20.70	52.2	147.2	12.7	13.52459016	3.797468354	14.67088608
732	0	321	0	3	F	48	17	0	8.94	4.43	8.7	67.5	421	0.04	6.09	1.93	0.59	0.3	0.03	13.0	0.25	0.0137	19.8	5.1	42.6	1.8	41.2	21.50	53.8	148.7	16.1	4.19047619	8.808290155	3.155440415
733	0	322	1	0	M	76	14	0	4.59	4.95	14.3	87.7	181	0	3.45	0.65	0.46	0.01	0.02	4.6	0.03	0.0277	31.2	6.2	2	1	0.1	11.20	48	153.9	7.7	0.488997555	1.538461538	5.307692308
734	0	322	0	1	M	76	15	0	4.23	4.43	12.9	89.2	183	0	2.88	0.84	0.48	0.02	0.01	3.6	0.03	0.0204	31.3	6.2	1.6	1.3	0.1	11.30	49.3	151	9.5	2.093023256	4.761904762	3.428571429
735	0	323	1	0	M	48	6	0	3.84	5.25	14.3	85.3	130	0	2.53	0.89	0.4	0.01	0.01	1.1	0.01	0.0373	28.6	5.8	2.9	0.5	0.2	7.50	55.7	154.6	12.4	2.694610778	3.370786517	2.842696629
736	0	323	0	4	M	48	10	0	3.01	5.23	14	86.6	134	0.01	1.72	0.92	0.35	0.01	0.01	2.2	0.02	0.0314	28.2	5.2	2.7	0.2	0.4	7.00	57.6	152.2		11.70886076	5.434782609	1.869565217
737	0	324	1	3	F	68	4	0	12.59	4.25	11.8	88.9	243	0	5.57	6.48	0.42	0.1	0.02	1.4	0.09	0.0493	28	3.9	1.5	-0.7	1	9.50	52	150.6		5.929919137	0.925925926	0.859567901
738	0	325	1	2	F	51	9	0	3.4	4.13	13.1	93.2	349	0	1.56	1.39	0.3	0.13	0.02	2.9	0.04	0.0359	31.7	2.2	0.6	0.4	0.3	7.70	49.4	147.6	25.9	8.148148148	10.79136691	1.122302158
739	0	326	1	0	M	73	9	1	12.12	4.17	13.7	99.3	365	0	11.34	0.37	0.38	0.01	0.02	56.8	0.21	0.0304	29.6	4.5	0.3	-3.6	0.2	16.40	52.5	151.7	27	9.117647059	18.91891892	30.64864865
740	0	326	0	1	M	73	10	1	8.06	3.67	11.9	100.5	391	0	6.82	0.5	0.42	0.29	0.03	30.0	0.15	0.0275	28.5	3.8	0.3	-4.4	0.6	14.90	53	150.7	14	9.283819629	6	13.64
741	0	326	0	2	M	73	11	1	9.35	3.39	11.1	100	349	0	8.71	0.23	0.24	0.15	0.02	56.5	0.13	0.0241	25.5	4.2	0.3	-7.2	0.9	14.70	54.9	150.9	21.7	22.89719626	8.695652174	37.86956522
742	0	326	0	3	M	73	12	1	8.06	3.78	12.3	100.5	384	0	7.19	0.43	0.23	0.19	0.02	23.3	0.1	0.0265	25.6	4.2	0.3	-7.2	0.6	16.10	53.5	150	11.6	22.70531401	2.325581395	16.72093023
743	0	326	0	4	M	73	13	1	9.47	3.6	11.8	104.2	440	0	8.49	0.45	0.34	0.16	0.03	28.9	0.13	0.0212	25.8	3.7	0.3	-6.6	1	16.30	55	150.6	13.3	9.666666667	2.222222222	18.86666667
744	0	327	1	1	M	78	4	0	9.48	4.43	13.1	88	250	0.01	8.64	0.53	0.29	0	0.02	15.1	0.08	0.0226	29.9	5.8	2.4	-0.8	0.2	14.50	54	155.7	11.3	5.836575875	3.773584906	16.30188679
745	0	328	1	2	M	75	9	1	13.18	3.07	11.1	114.3	144	0.07	12.01	0.67	0.49	0	0.01	10.4	0.07				0.9				51.8	158	17.9	5.429864253	10.44776119	17.92537313
746	0	328	0	3	M	75	10	1	15.42	3.24	11.7	114.2	131	0.12	13.69	0.98	0.73	0	0.02	20.4	0.2	0.0726	30.1	13.6	0.8	-4.6	0.8	17.80	52.3	154.4		10.26438569	25.51020408	13.96938776
747	0	329	1	0	F	55	12	0	12.19	3.24	12.7	107.4	242	0.06	10.18	0.83	1.14	0.02	0.02	24.1	0.2	0.2077	41.3	13.4	0.6	3.5	0.2	32.40	44.4	154.3	7.2	0.894632207	0	12.26506024
748	0	329	0	1	F	55	13	0	10.65	3.19	12.4	107.8	208	0.05	8.6	0.74	1.28	0.01	0.02	14.9	0.11	0.1959	40.8	13.2	0.5	3.1	0.2	27.50	45	151.1	5.4	1.147396293	0	11.62162162
749	0	329	0	2	F	55	14	0	9.03	3.08	12	112	192	0.07	7.03	0.91	1.03	0.03	0.03	12.1	0.11	0.2042	40.2	12.1	0.6	2.7	0.2	23.20	44.5	149	13.2	0.883002208	1.098901099	7.725274725
750	0	329	0	3	F	55	15	0	8.39	3.03	11.7	114.9	189	0.06	6.46	0.9	0.94	0.04	0.05	12.2	0.11	0.2082	40.2	11.6	0.6	2.8	0.2	21.90	44	147.4	6.7	2.527075812	0	7.177777778
751	0	330	1	0	M	48	2	0	4.07	4.99	15.5	93.4	245	0	3.51	0.22	0.33	0	0.01	13.6	0.03	0.0165	31	3.7	1	-1	0.2	9.10	56.3	154.4	18.2	5.315614618	4.545454545	15.95454545
752	0	331	1	8	M	78	2	1	4.32	3.42	10	93.6	150	0.06	3.59	0.49	0.19	0.04	0.01	42.9	0.21	0.0209	25.1	9.5	1.9	-4.1	1.2	14.30	58.4	150.3		48.60335196	16.32653061	7.326530612
753	0	331	0	9	M	78	3	1	4.56	3.4	10.1	94.4	133	0.05	3.74	0.52	0.18	0.11	0.01	42.3	0.22	0.0224	25.5	9.8	2	-4	0.8	13.00	57.7	149.8	17.3	16.25	9.615384615	7.192307692
754	0	331	0	10	M	78	4	1	4.54	3.48	10.4	94.5	116	0.08	3.89	0.36	0.18	0.1	0.01	55.6	0.2	0.0223	22.4	12.7	1.9	-6.7	1.2	14.70	57.9	150	16.7	14.63414634	5.555555556	10.80555556
755	0	331	0	11	M	78	5	1	5.39	3.55	10.6	93.2	141	0.09	4.55	0.58	0.18	0.07	0.01	32.8	0.19	0.0291	25.2	14.6	2.3	-4.4	0.8	20.60	56.4	151.1	15.5	7.051282051	5.172413793	7.844827586
756	0	331	0	14	M	78	8	1	6.79	3.24	9.5	88.6	308	0.04	5.64	0.67	0.42	0.04	0.02	19.4	0.13	0.0437	23.5	13.3	3.3	-6.3	0.8	41.00	55.6	149.9	13.4	4.289544236	5.970149254	8.417910448
757	0	331	0	15	M	78	9	1	7.51	3.31	9.7	88.8	378	0.03	6.17	0.74	0.5	0.07	0.03	25.7	0.19	0.052	23.7	12.9	3	-5.9	1.2	48.80	54.8	148.5	10.8	2.88248337	4.054054054	8.337837838
758	0	331	0	16	M	78	10	1	8.17	3.02	8.7	87.7	515	0.02	6.17	1.18	0.74	0.04	0.04	21.2	0.25	0.0507	25.4	10.5	3.2	-3.6	2	54.10	52.1	145.5	10.2	1.829268293	5.084745763	5.228813559
759	0	331	0	17	M	78	11	1	9.34	2.91	8.6	89.3	578	0.01	7.23	1.14	0.83	0.1	0.04	20.2	0.23	0.0544	29.4	9.1	2.5	0.2	1.8	52.60	49.2	142.8	10.5	1.206434316	3.50877193	6.342105263
760	0	331	0	18	M	78	12	1	9.52	3.31	9.6	87.3	637	0.01	7.25	1.08	0.95	0.19	0.05	22.2	0.24	0.0688	29.4	9	3	-0.4	1	57.30	47.2	142.5	7.4	0.356718193	1.851851852	6.712962963
761	0	332	1	0	M	61	1	1	14.36	5.91	17.6	93.1	174	0	11.31	1.71	1.19	0.07	0.08	14.0	0.24	0.0981	32.8	3.3	1.1	2.2	0.1	5.70	41.1	151.5	2.9	0.19047619	0	6.614035088
762	0	332	0	0	M	61	1	1	16.97	5.77	17.2	93.9	160	0.01	14.5	1.1	1.27	0.01	0.09	55.5	0.61	0.1021	33.2	4.6	0.9	2.7	0.1	7.40	43.5	151.4	1.8	0.088731145	0	13.18181818
763	0	333	1	5	F	28	5	1	5.71	3.4	11.4	97.1	376	0.02	4.17	1.08	0.34	0.1	0.02	24.1	0.26	0.0197	27	6.7	0.5	-5.7	0.6	25.20	56.9	150.5	17.6	2.931596091	2.777777778	3.861111111
764	0	333	0	6	F	28	6	1	6.13	3.38	11.1	98.2	406	0.01	4.15	1.4	0.47	0.06	0.05	27.9	0.39	0.0318	28.3	7.8	0.6	-4.7	0.3	31.70	58	151.4	17.1	2.336448598	2.857142857	2.964285714
765	0	333	0	7	F	28	7	1	8.38	3.54	11.5	99.7	457	0.02	5.66	2.04	0.55	0.06	0.07	33.8	0.69	0.0485	27.7	7.5	0.5	-5.2	0.3	34.30	58.2	154	18.6	2.874743326	2.941176471	2.774509804
766	0	334	1	2	M	64	14	0	11.07	4.33	13.3	93.1	350	0	7.86	1.54	1.3	0.31	0.06	11.0	0.17	0.0905	27.4	3.2	0.7	-3.7	1.2	11.20	46.8	145.1	12.3	0.50547599	2.597402597	5.103896104
767	0	334	0	3	M	64	15	0	12.17	4.47	13.6	92.4	359	0	8.74	1.65	1.29	0.39	0.1	7.3	0.12				0.8				45.7	144.8	10.3	0.431034483	1.818181818	5.296969697
768	0	335	1	10	F	69	3	1	11.21	2.92	8.7	91.8	409	0	8.6	1.31	1.02	0.21	0.07	19.8	0.26	0.1048	29.8	3.9	1.3	0.4	0.9	16.00	52.2	160.2	13	1.10619469	0.763358779	6.564885496
769	0	335	0	11	F	69	4	1	14.84	3.18	9.3	94	502	0.01	10.12	2.74	1.54	0.3	0.14	8.4	0.23	0.1221	28.4	4	1	-0.9	0.9	20.10	49	163.6	5.8	0.22172949	0.729927007	3.693430657
770	0	335	0	12	F	69	5	1	8.12	2.95	8.6	91.2	482	0	5.55	1.4	0.86	0.21	0.1	6.4	0.09	0.1198	28	3.7	1.4	-1.5	0.5	17.80	50.5	161	12.1	0.642673522	0.714285714	3.964285714
771	0	335	0	13	F	69	6	1	9.96	3.36	9.6	91.4	555	0	7.77	1.09	0.76	0.22	0.12	10.1	0.11	0.1297	28.7	3	1.4	-0.7	0.7	16.70	48.8	160.1	11.9	0.287356322	1.834862385	7.128440367
772	0	335	0	14	F	69	7	1	7.35	2.85	8.2	91.6	513	0	4.87	1.53	0.67	0.17	0.11	5.2	0.08	0.1134	29.6	3.1	1.3	0.3	0.6	15.90	48.6	158.6	16.3	0.497512438	1.307189542	3.183006536
773	0	335	0	19	F	69	12	1	8.02	3.36	9.7	91.4	509	0.01	5.47	1.46	0.93	0.08	0.08	6.8	0.1	0.1485	29.5	2.7	1.4	0.4	0.8	13.70	47.2	155	15.8	0.970873786	0.684931507	3.746575342
774	0	335	0	20	F	69	13	1	7.72	3.51	10.2	94.3	496	0.01	5.78	1.45	0.44	0.01	0.04	9.7	0.14	0.1737	28.1	2.9	1.2	-0.8	1	14.40	47.5	153	14.5	0.253807107	1.379310345	3.986206897
775	0	335	0	21	F	69	14	1	9.09	3.68	10.5	96.7	475	0.01	5.48	2.53	0.9	0.12	0.06	3.6	0.09	0.1847	28.7	3.6	0.8	-0.1	0.7	17.10	47	152.4	11.1	0.250626566	1.185770751	2.166007905
776	0	336	1	1	M	89	2	1	10.43	3.77	11.9	92.8	170	0.01	7.56	1.72	0.93	0.2	0.02	5.8	0.1	0.0954	33	6	0.7	0.7	0.1	10.20	50.9	159.8	2.9	1.97044335	0	4.395348837
777	0	337	1	0	M	81	7	0	4.98	4.89	14.7	91.2	74	0.01	4.43	0.28	0.25	0	0.02	14.3	0.04	0.0313	28.4	22.9	1.5	-2.8	0.2	16.90	49.2	155.3		2.727272727	3.571428571	15.82142857
778	0	338	1	3	M	79	1	0	6.08	4.59	14.3	93.5	198	0	4.59	0.9	0.58	0	0.01	6.7	0.06	0.0477	31.8	4.2	1.4	-0.1	0.1	8.30	46.7	155.8	4.4	1.883239171	1.111111111	5.1
779	0	339	1	0	F	48	1	0	8.12	4.82	14.2	89.8	316	0	6.51	1.12	0.42	0.04	0.03	4.5	0.05	0.0468	33.2	3.5	0.9	2.7	0.1	11.10	46.5	156.5	4.5	2.412868633	0	5.8125
780	0	340	1	0	M	35	1	0	16.46	4.63	14.1	90.9	112	0	11.28	3.13	1.96	0.02	0.07	2.2	0.07	0.0477	35.3	11.9	1.4	3.7	0.1	13.30	48.1	154.6	12.8	0.864553314	3.514376997	3.603833866
781	0	341	1	9	F	74	6	1	11.85	2.73	8.1	106.2	462	0.03	10.07	0.74	0.98	0	0.06	262.2	1.94	0.0366	25.8	3.9	0.5	-3.6	0.4	18.00	55	153.4	16.2	1.693002257	5.405405405	13.60810811
782	0	341	0	12	F	74	9	1	15.77	2.87	8.9	95.8	641	0.02	13.71	0.77	1.2	0	0.09	189.6	1.46	0.0631	28.8	5.1	1.7	-0.8	0.4	32.70	56.6	156.8	14.3	0.73664825	6.493506494	17.80519481
783	0	341	0	13	F	74	10	1	12.67	2.66	8.2	95.1	685	0.01	10.89	0.76	0.96	0	0.06	164.5	1.25	0.0662	32.3	5.2	1.6	2.5	0.2	35.60	54.9	155.5	14.5	0.684150513	6.578947368	14.32894737
784	0	341	0	14	F	74	11	1	10.73	2.38	7.3	94.5	630	0.01	9.09	0.79	0.8	0.01	0.04	98.7	0.78	0.0645	33.6	5.2	1.7	4	0.3	32.80	48.1	155	10.1	0.694444444	6.329113924	11.50632911
785	0	341	0	15	F	74	12	1	14.53	2.98	9	95.3	826	0.01	12.78	0.59	1.04	0.02	0.1	188.1	1.11	0.0918	32	4.3	1.4	2.4	0.5	35.50	50.8	150.2	16.9	0.444938821	6.779661017	21.66101695
786	0	341	0	16	F	74	13	1	12.33	2.67	8	97.4	699	0.01	10.63	0.72	0.9	0.03	0.05	97.2	0.7	0.0772	30.9	4.4	1.2	1.8	0.6	30.80	47.9	148.7	15.3	0.651041667	6.944444444	14.76388889
787	0	341	0	21	F	74	18	1	14.67	3.02	9	97.7	627	0.01	13.56	0.25	0.85	0	0.01	168.0	0.42	0.0625	30.4	4.8	1.1	1.5	1	30.10	47.4	143.5	28	0.790513834	20	54.24
788	0	341	0	22	F	74	19	1	23.29	3.36	10.2	99.7	661	0.02	21.85	0.49	0.89	0	0.06	240.8	1.18	0.0648	32.6	6.1	1	3.1	0.3	40.30	48	143.5	28.6	1.020408163	14.28571429	44.59183673
789	0	341	0	23	F	74	20	1	27.18	3.18	9.5	103.1	462	0.02	25.53	0.52	1.04	0	0.09	361.5	1.88	0.0579	33.4	6.9	0.7	4.2	0.4	31.90	48.6	143.5	17.3	0.645855759	7.692307692	49.09615385
790	0	342	1	0	M	76	1	0	12.94	3.38	10.5	99.4	239	0.01	10.48	1.16	1.15	0.1	0.05	2.6	0.03	0.0429	33.7	3.7	0.8	3.3	0.6	8.80	47.5	161.6	6.9	1.37254902	0	9.034482759
791	0	343	1	3	M	68	11	0	5.26	4.3	13.4	96.5	202	0	3.87	1.04	0.3	0.04	0.01	5.8	0.06	0.0262	32.6	11.2	0.5	0.7	0.2	22.60	57	144	18.3	12.5	14.42307692	3.721153846
792	0	344	1	0	F	68	1	0	14.4	3.76	10.4	91	346	0.02	12.02	0.76	1.17	0.31	0.14	22.4	0.17	0.0835	26.5	5.9	2.7	-1	1.3	20.40	44.3	153.4	15.8	0.100401606	1.315789474	15.81578947
793	0	345	1	2	F	79	4	1	3.71	3.15	10.3	101.3	115	0.03	2.59	0.55	0.56	0	0.01	9.1	0.05	0.0901	31.5	6.7	2.4	-1.2	0.3	7.70	58.4	154.3		13.32007952	0	4.709090909
794	0	346	1	0	F	72	3	0	7.34	4.38	13.3	92.7	186	0.01	5.88	1.16	0.28	0	0.02	2.6	0.03	0.0451	33.5	3.1	0.7	2.1	0.05	5.80	49.5	155.3	8.6	1.646090535	0.862068966	5.068965517
795	0	346	0	3	F	72	6	0	7.12	3.57	10.7	93	212	0.01	5.67	1.17	0.25	0.01	0.02	6.8	0.08	0.0368	29	5.2	0.7	-2.2	0.1	11.00	54	155.3	12.8	16.59192825	4.273504274	4.846153846
796	0	347	1	10	M	74	1	0	6.48	4.79	14.1	89.4	266	0.01	4.4	1.32	0.64	0.11	0.01	4.5	0.06	0.034	32.5	4.2	1.6	2.1	0.1	11.20	49.2	148.6	17.4	6.724137931	12.87878788	3.333333333
797	0	347	0	11	M	74	2	0	7.94	5.05	14.6	89.3	371	0	4.95	2.22	0.61	0.14	0.02	4.1	0.09	0.0364	31.4	3.7	1.7	1	0.1	13.70	46.5	148.2	9	3.95480226	6.756756757	2.22972973
798	0	348	1	3	M	78	14	1	2.37	3.06	8.9	97.1	71	0.01	2.14	0.15	0.07	0	0.01	20.0	0.03	0.049	23.2	11	2.8	-5.3	2.9	7.80	50	156.9	6.7	8.620689655	0	14.26666667
799	0	348	0	6	M	78	17	1	0.85	3.42	9.8	92.4	86	0	0.53	0.2	0.11	0	0.01	20.0	0.04	0.0222	25.5	13.3	4.4	-3.7	1.6	11.40	60.7	157		34	0	2.65
800	0	349	1	4	M	49	6	1	11.75	3.8	11.6	92.4	332	0.01	9.54	1.43	0.65	0.07	0.06	37.1	0.53	0.041	32.7	4.2	1.9	2.1	0.5	13.90	50.9	148.7	14.7	5.555555556	11.18881119	6.671328671
801	0	349	0	4	M	49	6	1	10.85	4	12.1	94	293	0.02	9.14	1.14	0.47	0.06	0.04	56.1	0.64	0.036	32.6	4.5	1.3	2.1	0.4	13.20	49.7	149.1	16.7	6.220095694	9.649122807	8.01754386
802	0	349	0	5	M	49	7	1	9.21	3.63	11	95.3	420	0.01	7.24	1.2	0.58	0.12	0.07	53.3	0.64	0.0439	30.9	2.9	1.4	0.3	0.4	12.20	52.8	146.6	12.5	4.789272031	5	6.033333333
803	0	349	0	6	M	49	8	1	8.99	3.65	11	97	494	0	7.23	0.93	0.6	0.17	0.06	58.1	0.54	0.046	29.2	2.3	1	-1.4	0.3	11.40	54.4	148.7	16.1	6.890130354	4.301075269	7.774193548
804	0	349	0	7	M	49	9	1	6.82	3.71	11.1	97.6	561	0.01	5.17	0.96	0.47	0.14	0.08	47.9	0.46	0.0364	26.5	1.9	0.9	-4	0.3	10.70	53.5	151.2	13.5	3.800475059	2.083333333	5.385416667
805	0	349	0	12	M	49	14	1	18.01	3.7	11.3	96.5	660	0	14.08	2.55	1.18	0.07	0.13	16.9	0.43	0.1147	35.6	1.3	1.1	5.1	0.4	8.60	52.4	160.3	12.5	1.235741445	1.960784314	5.521568627
806	0	349	0	13	M	49	15	1	16.99	3.52	10.7	96.9	585	0	13.49	1.88	1.34	0.1	0.18	18.1	0.34	0.1133	34.7	1.2	1.1	4.3	0.5	7.00	51.9	160.3	12.8	0.667779633	2.659574468	7.175531915
807	0	349	0	14	M	49	16	1	12.1	3.42	10.3	97.7	533	0	8.75	1.95	0.95	0.3	0.15	10.8	0.21	0.119	33.7	1.2	1	3.2	0.4	6.40	51.2	160	13.3	1.421800948	2.051282051	4.487179487
808	0	349	0	15	M	49	17	1	10.6	3.58	10.7	95	489	0	7.32	1.9	0.9	0.35	0.13	6.8	0.13	0.116	32.9	1.2	1	2.2	0.4	5.90	50.1	158.9	12.1	0.746268657	1.578947368	3.852631579
809	0	350	1	5	M	56	7	1	6.73	3.64	11.7	98.4	351	0.01	5.42	0.88	0.34	0.07	0.02	30.7	0.27	0.0291	32.4	4.6	0.4	0.2	0.1	16.10	48.2	152.7	15.9	5.067567568	5.681818182	6.159090909
810	0	350	0	8	M	56	10	1	7.47	3.6	11.5	98.6	484	0.01	5.64	1.24	0.43	0.12	0.04	30.6	0.38	0.0472	31.3	4.5	0.5	-0.9	0.1	21.80	47.1	152.1	21	2.604166667	4.032258065	4.548387097
811	0	350	0	9	M	56	11	1	7.64	3.55	11.2	97.7	588	0.01	5.59	1.27	0.63	0.11	0.04	31.5	0.4	0.0454	28.1	4.5	0.7	-3.8	0.2	26.50	46.7	152.3	17.3	1.754385965	3.149606299	4.401574803
812	0	350	0	10	M	56	12	1	9.07	3.54	11.2	100.6	658	0	6.77	1.38	0.77	0.12	0.03	15.2	0.21	0.0531	25	3.9	0.4	-6.8	0.2	25.70	48.5	153.8	18.1	2.13371266	3.623188406	4.905797101
813	0	350	0	11	M	56	13	1	10.32	3.63	11.3	98.9	786	0.01	7.6	1.53	1.03	0.13	0.03	11.8	0.18	0.0577	26.1	3.5	0.4	-5.7	0.2	27.50	49.6	155.5	17	0.769230769	3.921568627	4.967320261
814	0	350	0	12	M	56	14	1	9.81	3.36	10.6	101.2	668	0	7.32	1.43	0.92	0.11	0.03	8.4	0.12	0.0544	27.1	3.8	0.4	-4.7	0.4	25.40	49.8	157.9	16.8	0.373599004	1.398601399	5.118881119
815	0	350	0	17	M	56	19	1	8.57	3.46	11	97.4	734	0	5.87	1.81	0.65	0.19	0.05	6.1	0.11	0.0851	34.2	2.8	0.5	2.8	0.9	20.60	45.3	151.5	16	1.570680628	1.657458564	3.243093923
816	0	350	0	18	M	56	20	1	10.04	3.81	12	100.5	822	0	7.39	1.72	0.68	0.18	0.07	7.6	0.13	0.0884	34.3	2.8	0.4	2.8	0.6	23.00	44.9	148.8	20.9	1.973684211	2.906976744	4.296511628
817	0	350	0	19	M	56	21	1	9.69	3.57	11.2	102.8	732	0	6.87	1.73	0.8	0.22	0.07	7.5	0.13	0.0646	34	2.9	0.4	2.5	0.4	21.20	44.3	148.7	19.7	0.995732575	3.468208092	3.971098266
818	0	351	1	5	M	45	9	0	5.06	4.97	15.1	89.5	431	0.01	2.66	1.72	0.49	0.17	0.02	2.3	0.04	0.0383	36.2	1.5	0.8	4.7	0.1	6.50	49.1	145.6	10.5	4.081632653	4.651162791	1.546511628
819	0	352	1	0	F	71	5	0	3.88	4.55	12.9	84.8	131	0.01	2.99	0.69	0.19	0	0.01	2.9	0.02	0.0241	30.7	6.7	2.9	1.2	0.1	8.80	49.1	154.4	8.7	3.636363636	4.347826087	4.333333333
820	0	352	0	2	F	71	7	0	3.58	4.29	12.1	86	157	0	2	1.24	0.31	0.02	0.01	1.6	0.02	0.0257	29.3	6.9	2.4	0.1	0.2	10.80	50.4	151.2		2.857142857	4.032258065	1.612903226
821	0	353	1	2	M	52	7	1	7.39	5.07	14.5	90.9	283	0.05	5.77	1.24	0.28	0.08	0.02	9.7	0.12	0.0705	28.5	6.4	1.2	-1.1	0.3	18.10	52.6	147.2		16.04938272	11.29032258	4.653225806
822	0	353	0	3	M	52	8	1	6.78	4.71	13.4	92.4	271	0.02	5.49	0.83	0.25	0.18	0.03	9.6	0.08	0.0735	26	6.6	1	-3.2	0.7	17.90	54	145.5	20.5	13.76146789	14.45783133	6.614457831
823	0	353	0	4	M	52	9	1	6.18	4.84	13.8	91.9	347	0.05	4.67	1	0.31	0.17	0.03	10.0	0.1	0.0905	25.6	6.2	0.9	-3.7	0.4	21.50	55.2	147.1	22	14.63414634	10	4.67
824	0	354	1	3	M	72	9	0	4.85	5	14.5	88.6	254	0	3.53	0.79	0.43	0.09	0.01	5.1	0.04	0.0335	31.4	3.9	2	1.7	0.2	9.90	50.2	150.9		2.835051546	2.53164557	4.46835443
825	0	355	1	1	M	51	14	1	8.91	4.86	14.1	89.3	336	0	8.07	0.49	0.34	0	0.01	14.3	0.07	0.0326	29.8	4.9	1.5	-0.4	0.1	16.50	49.8	149.6		8.223684211	6.12244898	16.46938776
826	0	355	0	5	M	51	18	1	8.56	4.08	11.7	92.4	541	0.01	7.22	0.5	0.56	0.25	0.03	42.0	0.21	0.0343	26.9	5.2	1.4	-2.4	0.9	28.10	56.2	146.3	16	5.241935484	4	14.44
827	0	355	0	6	M	51	19	1	7.67	3.86	11.1	92.5	544	0.01	6.5	0.31	0.62	0.22	0.02	100.0	0.31	0.0317	26.4	6	1.5	-3	0.6	32.60	56.3	147	22.6	3.074141049	6.451612903	20.96774194
828	0	355	0	7	M	51	20	1	7.42	3.74	11	92.8	504	0.01	6.18	0.34	0.75	0.13	0.02	111.8	0.38	0.0378	26.1	6	1.4	-3.3	0.6	30.20	54.8	148.3	23.5	3.549382716	8.823529412	18.17647059
829	0	355	0	8	M	51	21	1	8.55	3.55	10.5	93.2	465	0.01	7.29	0.44	0.69	0.1	0.03	90.9	0.4	0.0238	25.3	5.5	1.3	-4.1	0.5	25.60	55.4	151.1	27.3	1.751592357	6.818181818	16.56818182
830	0	355	0	11	M	51	24	1	16.91	3.45	10	92.2	679	0	15.42	0.45	0.97	0.03	0.04	80.0	0.36	0.0386	25.3	4.7	1.5	-3.9	0.9	31.90	59.9	159.1	22.2	1.860465116	6.666666667	34.26666667
831	0	355	0	12	M	51	25	1	13.25	3.17	9.3	92.7	710	0.02	11.58	0.4	1.17	0.05	0.05	82.5	0.33	0.0396	23.7	4.7	1.6	-4.8	1.7	33.40	58.7	157.4	27.5	1.021355617	7.5	28.95
832	0	355	0	13	M	51	26	1	10.28	2.88	8.4	92.4	701	0.01	8.45	0.47	1.13	0.18	0.05	55.3	0.26	0.0544	24.9	4.8	1.5	-3.8	1.5	33.60	56.3	157.6	25.5	1.394422311	4.255319149	17.9787234
833	0	355	0	14	M	51	27	1	10.35	3.22	9.2	92.9	861	0	8.21	0.5	1.19	0.39	0.06	68.0	0.34	0.0766	25.9	4.8	1.6	-3.1	1.1	41.30	55.1	158.1	24	0.669856459	6	16.42
834	0	355	0	15	M	51	28	1	9.61	3.38	9.7	92.3	962	0.01	7.6	0.65	0.88	0.43	0.05	41.5	0.27	0.0916	27	4.4	1.6	-1.9	1.2	42.30	53.7	157	27.7	1.385390428	6.153846154	11.69230769
835	0	356	1	2	M	55	5	1	2.71	4.24	12.8	92.7	96	0.01	1.58	0.99	0.13	0	0.01	3.0	0.03	0.0267	31.3	9.2	1.1	0.3	0.1	8.80	51.1	152.5		10	2.02020202	1.595959596
836	0	356	0	5	M	55	8	1	3.51	4.19	12.5	92.1	195	0.01	2.45	0.74	0.3	0.01	0.01	9.5	0.07	0.0356	31	7.2	1.2	0.2	0.1	14.00	50.1	148	5.4	6.545454545	1.351351351	3.310810811
837	0	356	0	6	M	55	9	1	4.09	3.85	11.5	95.6	228	0.01	2.66	0.96	0.42	0.03	0.02	18.8	0.18	0.0397	30.4	6.7	0.9	-0.2	0.2	15.30	50.3	147.8	8.3	3.875968992	4.166666667	2.770833333
838	0	356	0	7	M	55	10	1	5.37	3.71	11.1	97.3	302	0.05	3.87	0.95	0.47	0.05	0.03	32.6	0.31	0.0471	28.7	6.6	0.8	-1.7	0.2	19.90	53.3	145.4	8.4	5.647058824	4.210526316	4.073684211
839	0	356	0	8	M	55	11	1	6.3	3.41	10.4	98.8	358	0.03	4.55	0.92	0.66	0.14	0.03	41.3	0.38	0.0454	26	5.8	0.7	-4.2	0.3	20.80	50.4	144.8	10.9	2.013422819	5.434782609	4.945652174
840	0	356	0	9	M	55	12	1	6.2	3.54	10.7	98.3	413	0.01	4.71	0.66	0.65	0.16	0.02	57.6	0.38	0.0566	24.5	5.3	0.7	-5.8	0.3	21.90	50.5	144.8	12.1	1.706484642	4.545454545	7.136363636
841	0	356	0	12	M	55	15	1	8.33	3.54	10.8	95.5	409	0.01	6.03	1.38	0.74	0.14	0.04	29.0	0.4	0.0573	26.8	6	1	-3.2	0.8	24.50	50.5	148.1	11.6	0.913242009	2.173913043	4.369565217
842	0	356	0	13	M	55	16	1	7.88	3.49	10.6	97.7	383	0.02	5.86	1.23	0.61	0.13	0.05	29.3	0.36	0.0688	28	7	0.9	-1.9	0.9	26.80	51.4	147.8	11.4	1.071428571	2.43902439	4.764227642
843	0	356	0	14	M	55	17	1	8.8	3.55	10.7	94.1	423	0.01	6.44	1.42	0.75	0.14	0.05	13.4	0.19	0.0788	29.4	7.4	1.1	-0.7	0.6	31.30	47.9	150.1	6.3	0.446428571	1.408450704	4.535211268
844	0	356	0	15	M	55	18	1	12.38	3.84	11.5	95.8	460	0.01	9.85	1.19	1.13	0.17	0.04	16.0	0.19	0.1137	30.7	8.2	0.8	0.5	0.5	37.70	50.7	148.6	5	0.898203593	0.840336134	8.277310924
845	0	356	0	16	M	55	19	1	10.76	3.73	11.2	97.1	432	0	8.17	1.26	1.19	0.1	0.04	10.3	0.13	0.1153	30.7	7.9	0.6	0.6	0.5	34.10	49.3	147.7	5.6	0.374882849	0.793650794	6.484126984
846	0	357	1	0	M	64	10	0	6.3	4.01	13.2	99.5	187	0	4.79	0.88	0.54	0.08	0.01	4.5	0.04	0.0421	30.4	8.7	0.3	-2.8	0.1	16.30	49.3	155.3	9.1	0.831600832	3.409090909	5.443181818
847	0	358	1	0	F	31	5	0	5.47	5.04	11.3	75.2	232	0	2.86	2.27	0.3	0.03	0.01	1.8	0.04	0.1109	24.1	2.4	12.6	1.8	2.5	5.60	47.1	154.4	3.5	1.831501832	0.440528634	1.259911894
848	0	359	1	1	F	85	7	0	7.22	4	11.7	86.3	208	0.01	5.89	0.95	0.35	0.01	0.02	14.7	0.14	0.0332	30.1	7.9	2	-0.5	0.2	16.40	49.8	152		6.309148265	4.210526316	6.2
849	0	359	0	3	F	85	9	0	7.87	3.86	11.4	87.8	272	0	6.2	1	0.57	0.08	0.02	18.0	0.18	0.0359	28.6	6	1.7	-1.8	0.1	16.30	49.6	149.8	10	3.143418468	4	6.2
850	0	359	0	9	F	85	15	0	9.73	4.05	11.9	86.4	523	0	7.14	1.74	0.67	0.13	0.05	25.9	0.45	0.0717	34.8	3.2	1.9	4.6	0.2	16.70	48.8	155.6	8.6	0.664451827	2.298850575	4.103448276
851	0	360	1	1	F	64	7	1	6.36	4.22	12.3	93.8	199	0	5.07	1.11	0.16	0.01	0.01	4.5	0.05	0.0245	32.5	4.3	1.1	2.6	0.3	8.60	54.5	151.3	6.3	5.442176871	2.702702703	4.567567568
852	0	360	0	2	F	64	8	1	7.56	4.15	12.2	94.5	214	0	5.7	1.57	0.22	0.05	0.02	3.2	0.05	0.0228	30.4	4.5	1.1	0.6	0.4	9.60	55	149.7	5.1	10.63829787	1.910828025	3.630573248
853	0	360	0	3	F	64	9	1	9.99	4.36	12.7	94.3	300	0.01	8.13	1.36	0.34	0.14	0.02	7.4	0.1	0.0235	28.7	5.4	1.2	-1	0.5	16.20	55.8	148.6	8.8	11.36363636	2.941176471	5.977941176
854	0	360	0	4	F	64	10	1	10.52	3.85	11.4	93.8	341	0.01	8.62	1.3	0.39	0.19	0.02	8.5	0.11	0.0219	30	4.6	1.1	0.1	0.1	15.70	52.4	149.7	9.2	6.470588235	4.615384615	6.630769231
855	0	360	0	7	F	64	13	1	9.28	3.62	10.6	98.3	485	0	6.58	1.9	0.62	0.15	0.03	8.9	0.17	0.0376	23.5	5.3	0.7	-5.7	0.5	25.70	56.4	150.1	10.5	2.946593002	2.631578947	3.463157895
856	0	360	0	8	F	64	14	1	10.96	3.77	10.9	97.6	527	0.01	7.78	2.17	0.73	0.25	0.03	5.5	0.12	0.0418	25.1	4.9	0.8	-4.4	0.3	25.80	55.7	152.7	8.3	1.238390093	1.382488479	3.585253456
857	0	360	0	9	F	64	15	1	9.36	3.13	7.6	83.4	437	0.06	5.83	2.53	0.64	0.3	0.06	16.6	0.42	0.0482	20.3	11.5	9.5	-4.1	5.4	50.30	57.4	154.1	12.3	1.198630137	1.581027668	2.304347826
858	0	360	0	10	F	64	16	1	13.24	4.1	11.9	96.6	650	0.02	10.85	1.46	0.78	0.08	0.07	32.2	0.47	0.05	29.7	5.4	0.9	0.3	0.5	35.10	56.6	157.9	11.6	2.414772727	2.054794521	7.431506849
859	0	360	0	10	F	64	17	1	13.2	3.94	11.6	97	616	0.02	10.52	1.78	0.7	0.11	0.09	31.5	0.56	0.052	29.4	5	1	0.2	0.8	30.80	56.2	157.5	9.6	1.449275362	1.685393258	5.91011236
860	0	360	0	11	F	64	18	1	12.18	3.96	11.6	96.7	625	0.02	9.93	1.53	0.6	0.07	0.05	22.9	0.35	0.0772	32.4	5.3	0.9	3.1	0.6	33.10	55.2	157.1	11.1	2.230483271	1.960784314	6.490196078
861	0	361	1	1	M	52	10	1	9.23	4.72	15.3	93.2	235	0.01	8.1	0.62	0.48	0.01	0.02	11.3	0.07	0.043	31	7.1	0.6	-1.8	0.1	16.70	54.8	156	14.5	3.325415677	6.451612903	13.06451613
862	0	361	0	2	M	52	11	1	7.43	4.31	14	95.1	192	0	6.47	0.31	0.58	0.06	0.01	29.0	0.09	0.0358	29.6	7.4	0.5	-3.1	0.1	14.20	56.4	153.4	16.1	6.862745098	9.677419355	20.87096774
863	0	361	0	9	M	52	18	1	8.53	3.55	11.3	101.7	260	0.01	7.47	0.33	0.5	0.2	0.03	30.3	0.1	0.0291	27.1	11	0.5	-3.9	2	28.60	59.3	160.8	21.2	1.372997712	3.03030303	22.63636364
864	0	361	0	10	M	52	19	1	6.89	3.03	9.7	104	265	0	5.63	0.59	0.4	0.24	0.03	15.3	0.09	0.0321	30.1	10.4	0.3	-1.6	0.7	27.60	61.5	159.7	18.6	1.744186047	5.084745763	9.542372881
865	0	361	0	11	M	52	20	1	8.35	3.62	11.5	101.4	387	0.02	6.99	0.5	0.46	0.37	0.03	18.0	0.09	0.0532	33.2	9.2	0.2	1.3	0.4	35.60	57.4	161.1	18	0.950118765	6	13.98
866	0	362	1	0	M	43	10	0	8.07	5.5	15.3	85.6	246	0.01	3.86	3.3	0.58	0.29	0.04	1.2	0.04	0.093	32	4.1	1.8	3.1	0.1	10.10	47.3	154.9	1.8	0.388349515	0	1.16969697
867	0	363	1	2	M	75	12	0	8	4.4	13.8	89.1	186	0	7.25	0.41	0.3	0.03	0.01	17.1	0.07	0.0365	30.3	4.2	1.4	-1.2	0.8	7.80	47.6	147.6	19.5	2.651515152	7.317073171	17.68292683
868	0	364	1	4	F	57	7	0	5.83	3.69	11	90.5	372	0	4.22	1.23	0.34	0.03	0.01	6.5	0.08	0.0336	32.4	4.1	1.3	1.7	0.1	15.30	47.5	154.4	17.1	5.280528053	10.56910569	3.430894309
869	0	364	0	6	F	57	9	0	5.68	3.39	10.3	92.3	490	0	4.02	1.23	0.33	0.08	0.02	7.3	0.09	0.0441	33.2	3.4	1	2.6	0.2	16.70	50	152.1	13.8	1.677852349	3.25203252	3.268292683
870	0	365	1	0	M	53	11	0	12.85	5.02	15.8	95	171	0	11.32	0.98	0.54	0	0.01	8.2	0.08	0.0296	34.5	9.2	0.7	2.2	0.1	15.70	50.3	150.5	6.1	1.006036217	3.06122449	11.55102041
871	0	365	0	5	M	53	16	0	12.63	3.37	10.7	101.5	459	0.01	9.62	1.6	1.1	0.28	0.03	26.3	0.42	0.0286	33.1	6.2	0.4	1.3	0.1	28.50	55.3	146.5	12.5	4.004004004	6.875	6.0125
872	0	365	0	6	M	53	17	0	13.74	3.39	10.8	101.2	579	0.04	10.14	2.1	1.16	0.31	0.03	29.0	0.61	0.0471	33.4	6.6	0.5	1.6	0.1	38.20	53.8	147.6	11	2.450980392	4.761904762	4.828571429
873	0	365	0	7	M	53	18	0	11.78	3.11	9.8	101	545	0.04	8.4	2.14	1.05	0.16	0.03	25.7	0.55	0.0454	30.8	5.8	0.4	-1	0.1	31.60	52.9	149.6	11.2	1.689545935	2.336448598	3.925233645
874	0	365	0	8	M	53	19	0	13.46	3.06	9.8	103.3	521	0.05	10.33	1.85	1.15	0.1	0.03	33.0	0.61	0.0523	31.3	5.5	0.3	-0.5	0.1	28.70	55.1	149.9	11.4	2.480916031	3.243243243	5.583783784
875	0	365	0	9	M	53	20	0	15.22	2.92	9.3	103.1	529	0.01	12.03	1.92	1.14	0.11	0.02	20.8	0.4	0.0634	31.4	5.7	0.4	-0.5	0.1	30.20	54.9	153.6	11.5	0.597609562	2.604166667	6.265625
876	0	366	1	3	M	51	8	0	6.13	4.83	14.2	86.5	295	0	4.65	1.1	0.17	0.2	0.01	4.5	0.05	0.0377	29.8	5	2	-0.5	0.3	14.80	52.3	150.5		6	8.181818182	4.227272727
877	0	367	1	0	M	55	15	0	10.48	4.31	12.3	83.8	265	0	8.61	1.35	0.51	0	0.01	5.9	0.08	0.0246	31.8	4.1	3.6	2.4	0.1	10.90	51.6	152.7		5.021834061	8.888888889	6.377777778
878	0	367	0	2	M	55	17	0	10.8	4.04	11.3	83.2	361	0	8.44	1.71	0.56	0.06	0.03	10.5	0.18	0.0299	29.8	4.9	4.2	0.8	0.5	17.70	52.1	148.9		6.639839034	7.602339181	4.935672515
879	0	368	1	10	F	53	12	1	6.4	3.52	10.3	88.6	377	0	4.45	1.3	0.59	0.04	0.02	16.9	0.22	0.0588	31.8	5.4	1.5	2.3	0.3	20.40	52	158.5	13.1	0.779727096	3.846153846	3.423076923
880	0	369	1	3	M	58	10	0	5.39	4.74	13.4	88	282	0	4.31	0.56	0.45	0.06	0.01	8.9	0.05	0.0261	31.9	9.5	1.8	2.5	0.2	26.80	52.8	147	16.1	2.75	7.142857143	7.696428571
881	0	369	0	5	M	58	12	0	5.51	4.64	13	88.4	369	0.01	3.96	0.76	0.61	0.16	0.02	7.9	0.06	0.0329	32.6	8.6	1.8	3.2	0.1	31.70	52	148.1	15.8	3.571428571	6.578947368	5.210526316
882	0	369	0	8	M	58	15	0	5.31	4.57	13	88.4	484	0	3.36	1.14	0.6	0.18	0.03	5.3	0.06	0.0416	33.3	7.5	2.2	4.1	0.2	36.30	49.1	147.8	9.6	0.959692898	2.631578947	2.947368421
883	0	370	1	0	M	65	6	0	5.27	5.23	15.4	87.8	160	0	4.2	0.64	0.41	0	0.02	4.7	0.03	0.0246	32.1	9.1	1.6	1.5	0.1	14.60	53.1	153.7	6.3	1.072386059	3.125	6.5625
884	0	371	1	0	F	56	9	0	12.66	5.05	14.5	87.9	352	0	7.28	4.24	0.75	0.28	0.11	5.2	0.22	0.101	31.3	3.3	1.9	2	0.1	11.60	48.2	150.4	6.1	0.600600601	0	1.716981132
885	0	372	1	5	F	73	3	0	5.11	4.09	12	89.2	269	0.01	3.76	0.72	0.55	0.06	0.02	12.5	0.09	0.0196	30.4	4.9	2.1	0.3	0.2	13.20	51.5	146.8	12.5	6.12244898	2.777777778	5.222222222
886	0	373	1	0	M	73	4	0	5.37	4.44	14.5	91.9	155	0	4.1	0.69	0.56	0.01	0.01	5.8	0.04	0.0324	29.5	7	1.3	-2.3	0.1	10.90	51.8	150.4	11.6	1.391650099	4.347826087	5.942028986
887	0	374	1	0	M	40	1	0	12.92	4	10.5	87	427	0	11.53	0.54	0.54	0.28	0.03	9.3	0.05	0.0752	25.8	2.5	2.4	0.2	3.3	10.70	53.4	159.2	7.4	1.050420168	0	21.35185185
888	0	375	1	0	M	73	10	0	4.1	3.87	11.7	89.1	362	0	3.41	0.34	0.33	0.01	0.01	14.7	0.05	0.0209	30.7	4.3	1.3	0.3	0.2	15.60	50.5	152.2	5.9	1.730103806	0	10.02941176
889	0	375	0	2	M	73	12	0	3.83	3.39	10.6	91.7	344	0	3.32	0.28	0.22	0	0.01	14.3	0.04	0.0217	29.5	3.4	1	-0.2	0.7	11.70	51.1	151.6	7.1	8.542713568	0	11.85714286
890	0	375	0	6	M	73	16	0	5.46	3.46	10.5	90.5	414	0.01	4.5	0.46	0.41	0.08	0.01	26.1	0.12	0.0325	27.4	3.5	1.2	-2.6	0.3	14.50	50.7	151.8	23.9	3.835616438	6.52173913	9.782608696
891	0	376	1	0	M	54	7	0	7.31	4.4	13.3	91.8	530	0	4.53	1.74	0.64	0.36	0.04	9.8	0.17	0.0396	33.4	4.4	0.8	2.8	0.2	23.30	52.1	145.9	20.1	3.220035778	5.172413793	2.603448276
892	0	376	0	0	M	54	12	0	7.58	4.58	13.9	90.8	620	0.01	4.42	2.16	0.69	0.24	0.07	11.6	0.25	0.0641	34.5	3.4	1	4	0.2	21.10	51.9	150.7	15.3	1.93236715	4.62962963	2.046296296
893	0	377	1	0	M	50	4	1	7.8	5.54	15.9	83.6	57	0	6.65	0.82	0.32	0	0.01	8.5	0.07	0.0216	32.7	13.7	3.3	3.1	0.1	7.80	56.9	149.9		10.43165468	6.097560976	8.109756098
894	0	377	0	1	M	50	5	1	8.36	5.46	15.4	87.5	107	0.01	7.61	0.56	0.17	0	0.02	7.1	0.04	0.0317	31.8	11.5	2.2	2.3	0.1	12.30	67.5	150.9	14.3	24.50331126	10.71428571	13.58928571
895	0	377	0	2	M	50	6	1	15.97	4.76	13.5	86.8	59	0	14.95	0.6	0.39	0	0.03	40.0	0.24	0.0176	30.3	18.3	2.6	0.9	0.1	10.80	70.5	152.2		44.05797101	18.33333333	24.91666667
896	0	377	0	5	M	50	9	1	8.26	3.92	11	86	38	0.02	6.45	1.05	0.67	0.06	0.03	57.1	0.6	0.0153	27.3	22	3.8	-1.3	0.8	8.40	64.7	151.3	21.9	10.31613977	8.571428571	6.142857143
897	0	377	0	6	M	50	10	1	8.73	3.92	11.1	88.3	51	0.02	6.62	1.38	0.59	0.09	0.05	88.4	1.22	0.0184	26.4	20.5	2.9	-2.2	0.6	10.50	60.3	149.6	16.7	4.347826087	4.347826087	4.797101449
898	0	377	0	7	M	50	11	1	8.42	3.82	10.9	86.6	52	0	6.42	1.31	0.62	0.05	0.02	77.9	1.02	0.0172	25.8	20.3	2.9	-2.7	0.5	10.60	59.7	153	15.3	1.824817518	3.816793893	4.900763359
899	0	377	0	8	M	50	12	1	8.26	3.9	11	90.8	70	0.01	5.97	1.39	0.81	0.06	0.03	56.1	0.78	0.0191	24.1	21.2	1.8	-4.4	0.4	14.80	62.3	152.9	10.8	2.493074792	2.877697842	4.294964029
900	0	377	0	9	M	50	13	1	9.23	3.78	10.6	90.5	78	0	7.18	1.22	0.72	0.07	0.04	40.2	0.49	0.014	23.5	20.8	1.8	-4.9	0.6	16.20	61.9	155.4	11.5	3.120124805	3.278688525	5.885245902
901	0	378	1	0	F	60	7	1	8.79	4.03	13.8	97.5	381	0.01	7.75	0.78	0.25	0	0.01	11.5	0.09	0.0282	34.3	2.6	0.4	0.2	0.1	9.90	55.8	153.6	10.3	9.389671362	6.41025641	9.935897436
902	0	378	0	2	F	60	9	1	11.16	3.22	10.9	102.8	319	0	10.07	0.78	0.29	0.01	0.01	17.9	0.14	0.0219	31.2	3.1	0.4	-2.6	0.3	9.90	56.5	150.2		14.50381679	7.692307692	12.91025641
903	0	378	0	3	F	60	10	1	12.4	3.04	10.4	104.9	274	0.01	10.88	0.85	0.54	0.11	0.02	25.9	0.22	0.024	29	5.6	0.3	-4.5	0.5	15.30	55.2	148.7		20.53941909	4.705882353	12.8
904	0	378	0	6	F	60	13	1	14.47	2.59	8.8	102.7	268	0.08	12.1	0.89	1.2	0.25	0.03	130.3	1.16	0.0241	27.7	7.5	0.7	-5.4	0.8	20.10	55.3	150.4	21.3	3.689687796	11.23595506	13.59550562
905	0	378	0	7	F	60	14	1	16.42	2.58	8.7	103.1	275	0.18	14.02	0.88	1.18	0.3	0.04	277.3	2.44	0.0351	27.3	10.1	0.9	-5.8	0.8	27.80	58.5	152.2	21.6	5.047619048	9.090909091	15.93181818
906	0	378	0	8	F	60	15	1	17.97	2.57	8.6	102.3	278	0.25	15.27	1.1	1.24	0.27	0.09	363.6	4	0.0419	27.1	11.4	0.7	-5.6	1.2	31.70	60.4	155.4	24.5	4.714415231	9.090909091	13.88181818
907	0	378	0	9	F	60	16	1	19.9	2.6	8.7	105.4	247	0.22	17.09	1.04	1.38	0.32	0.07	340.4	3.54	0.0507	28.9	10.3	0.5	-4.2	0.6	25.40	64.1	155.4	17.3	3.565640194	6.730769231	16.43269231
908	0	378	0	10	F	60	17	1	23.06	2.48	8.3	102.8	250	0.2	19.31	1.55	1.84	0.26	0.1	189.7	2.94	0.0627	31.2	12.5	0.6	-2.2	0.2	31.30	62.4	155.8	18.1	2.22504768	5.161290323	12.45806452
909	0	379	1	0	M	49	5	0	2.03	5.42	15.4	87.1	130	0.01	1.27	0.54	0.21	0	0.01	1.9	0.01	0.0276	31	8.1	2	1.5	0.1	10.50	54.5	157.3	7.4	2.732240437	3.703703704	2.351851852
910	0	380	1	0	M	51	9	0	6.12	5.04	15.2	91.5	173	0	3.67	1.78	0.62	0.03	0.02	7.3	0.13	0.0418	33.5	6.2	0.9	2.5	0.1	10.70	53.9	154.7	8.4	1.090909091	1.685393258	2.061797753
911	0	381	1	2	M	55	7	0	6.14	4.74	14.2	90.3	178	0	4.48	1.05	0.59	0.01	0.01	6.7	0.07	0.0327	27.2	10	1.3	-3.4	0.3	17.80	53	144.9		3.486238532	4.761904762	4.266666667
912	0	382	1	2	F	74	4	1	4.4	3.67	10.7	91.3	203	0.02	3.6	0.64	0.15	0	0.01	7.8	0.05	0.0128	28.4	2.9	1.7	-1.7	0.4	5.90	51.9	152.1	7.8	10.44776119	3.125	5.625
913	0	383	1	4	F	70	4	0	5.93	4.03	11.8	92.8	187	0	4.4	1.21	0.29	0	0.03	17.4	0.21	0.0254	25.9	4.8	1.6	-3.9	0.5	9.00	55.3	154.4		19.92619926	24.79338843	3.636363636
914	0	384	1	1	F	64	4	1	9.19	3.3	8.2	87.3	248	0.08	6.84	1.37	0.55	0.4	0.03	12.4	0.17	0.0234	17.7	10.8	7.4	-6.4	6.2	26.80	57.3	144.1	13.9	5.144032922	2.919708029	4.99270073
915	0	384	0	2	F	64	5	1	12.07	3.6	8.9	85.6	286	0.08	9.74	1.24	0.67	0.39	0.03	46.0	0.57	0.0292	20.1	10.8	8.7	-4.5	4.9	30.90	58.2	145.2	18.5	4.105090312	3.225806452	7.85483871
916	0	384	0	5	F	64	8	1	13.83	3.45	8.5	83.2	384	0.09	10.23	2.25	1.01	0.28	0.06	29.8	0.67	0.0486	18.8	12.4	9.7	-5.8	4.6	47.60	58.8	153.6	14.2	1.218161683	1.777777778	4.546666667
917	0	384	0	6	F	64	9	1	11.42	3.32	8	84	413	0.06	8.11	2.27	0.73	0.27	0.04	23.8	0.54	0.0558	19	11.9	8.7	-5.7	4.3	49.10	59.1	153.3	16.3	1.671732523	2.202643172	3.572687225
918	0	384	0	7	F	64	10	1	9.87	3.63	10.9	96.7	560	0.01	7.41	1.61	0.65	0.17	0.03	8.7	0.14	0.0352	26.1	5	0.9	-3.2	0.5	28.00	53.3	155.8	6.8	1.02915952	1.242236025	4.602484472
919	0	384	0	8	F	64	11	1	14.24	3.44	8.4	85.2	538	0.11	9.52	3.2	1.03	0.38	0.11	16.6	0.53	0.0602	23.1	11.4	8.6	-1.6	4.5	61.30	56.5	151.8	11.6	0.875273523	0.9375	2.975
920	0	384	0	8	F	64	12	1	14.5	3.4	8.2	85.3	533	0.12	9.35	3.7	0.99	0.37	0.09	16.8	0.62	0.0847	23.2	10.7	8.3	-1.4	4.9	57.00	54.9	151.5	10	0.232018561	0.810810811	2.527027027
921	0	385	1	1	M	64	7	1	6.82	4.56	14.9	98	93	0	5.31	0.45	1.04	0.01	0.01	13.3	0.06	0.0333	29.3	6.3	0.8	-3.6	0.4	5.90	61.6	154.2	2.2	3.533190578	0	11.8
922	0	386	1	0	F	71	2	0	5.84	4.01	11.8	87	206	0.01	4.12	0.93	0.76	0.02	0.01	4.3	0.04	0.0417	28.9	3.9	1.8	-1.5	0.1	8.00	51.1	148.8	14	1.622418879	2.150537634	4.430107527
923	0	386	0	1	F	71	3	0	4.85	4.05	12	87.4	212	0	3.44	0.7	0.64	0.06	0.01	2.9	0.02	0.0421	27.7	3.9	1.8	-2.5	0.1	8.30	50	150.2	20	1.36286201	5.714285714	4.914285714
924	0	387	1	4	M	77	4	0	8.19	4.79	15.1	91.4	160	0	5.65	1.86	0.65	0.01	0.02	3.2	0.06	0.0321	31	7.3	0.8	-1.2	0.05	11.70	50.2	151.6	16.7	6.153846154	10.75268817	3.037634409
925	0	388	1	1	F	69	2	0	11.89	4.39	12.9	90.2	462	0.01	9.33	1.34	1.05	0.13	0.04	6.7	0.09	0.065	26.8	5.2	1.1	-3.4	0.1	24.00	50.8	151.8	17.9	1.264488936	0.746268657	6.962686567
926	0	389	1	2	M	76	7	0	3.67	4.27	13.3	90.6	128	0	2.93	0.44	0.29	0	0.01	6.8	0.03	0.026	32.6	9.6	0.8	0.7	0.1	12.30	55.3	152.4		15.89147287	6.818181818	6.659090909
927	0	389	0	6	M	76	11	0	5.57	4.28	13.2	89.3	193	0	3.9	0.83	0.67	0.15	0.02	6.0	0.05	0.0287	34.9	8.7	1	3.2	0.1	16.80	56.5	150.9	25.3	7.783417936	12.04819277	4.698795181
928	0	390	1	2	F	80	6	0	6.75	4.07	9.1	77.6	239	0	5.99	0.55	0.19	0	0.02	16.4	0.09	0.013	19.1	5.4	13.1	-2.2	13.3	12.90	54.3	148.9	20	24.85207101	12.72727273	10.89090909
929	0	390	0	6	F	80	10	0	7.64	4.26	9.5	76.1	366	0.01	6.23	0.96	0.42	0.01	0.02	16.7	0.16	0.0285	27.4	5.8	16.1	5.4	8.9	21.20	52.5	148.2	15.6	9.016393443	8.333333333	6.489583333
930	0	390	0	10	F	80	14	0	9.54	4.6	10.3	80.4	644	0	7.92	0.95	0.56	0.07	0.04	15.8	0.15	0.1293	32.6	5.5	13.1	11.5	15.1	35.40	51.7	149.5	16.8	1.394422311	6.315789474	8.336842105
931	0	391	1	0	M	84	6	1	14.15	3.83	10.3	83.8	387	0.01	13.33	0.32	0.47	0	0.03	65.6	0.21	0.0425	22.1	4.8	5.6	-4.6	1.5	18.60	52.5	145	21.9	2.582159624	9.375	41.65625
932	0	392	1	2	F	85	14	1	6.23	4.1	11.2	83.7	335	0.01	5.21	0.78	0.22	0.01	0.01	7.7	0.06	0.0201	25.9	5.9	3.2	-2.5	0.8	19.80	56.3	157.9	17.9	10.76923077	12.82051282	6.679487179
933	0	392	0	5	F	85	17	1	7.75	3.85	10.7	83.1	476	0.01	6.32	0.76	0.54	0.11	0.02	11.8	0.09	0.0258	27.6	5.1	3.4	-1	0.4	24.30	54.3	153.7	19.7	5.383022774	9.210526316	8.315789474
934	0	393	1	5	M	83	10	0	5.05	4.63	13.9	90.1	180	0	3.8	0.7	0.53	0.01	0.01	4.3	0.03	0.031	29.9	7.9	1.3	-0.8	0.1	14.20	51.9	161.2	4.3	1.492537313	2.857142857	5.428571429
935	0	394	1	2	M	51	1	0	1.62	4.61	13.6	89.4	158	0	1.01	0.4	0.2	0	0.01	2.5	0.01	0.0189	34.5	6.3	0.8	3.9	0.1	10.00	55.9	147.8	7.5	3.888888889	2.5	2.525
936	0	395	1	2	F	67	10	0	8.03	3.71	11.4	95.1	231	0	5.82	1.64	0.52	0.03	0.02	3.7	0.06	0.0263	27.2	6.5	0.5	-3.8	0.6	15.00	51.7	152.8	12.8	2.649006623	5.487804878	3.548780488
937	0	396	1	2	M	70	10	0	9.84	4.28	12.8	90	260	0	7.51	1.25	1.01	0.05	0.02	5.6	0.07	0.0261	30.2	4.8	1.2	-0.6	0.2	12.50	52.6	156	13.6	1.947308133	8	6.008
938	0	397	1	2	M	79	8	0	5.35	5.26	14.6	82.3	282	0	3.5	1.4	0.44	0	0.01	2.9	0.04	0.0237	27.1	3.4	4.5	-1.4	0.3	9.60	53.5	154.9	6.4	2.624671916	1.428571429	2.5
939	0	397	0	5	M	79	11	0	5.65	4.79	13.1	82.5	363	0	4.06	0.88	0.6	0.1	0.01	4.5	0.04	0.0244	28.4	3.3	4.5	-0.3	0.2	12.00	52.8	153.1	8	2.626641651	3.409090909	4.613636364
940	0	398	1	6	M	63	7	0	13.2	3.98	10.9	84.9	379	0	11.2	0.81	0.75	0.39	0.05	38.3	0.31	0.0549	27.2	6.9	3.3	-1.1	0.4	26.20	50.2	148	21	0.744047619	4.938271605	13.82716049
941	0	399	1	2	M	72	12	0	11.25	4.25	13.5	94.4	256	0	9.29	0.9	1.04	0	0.02	15.6	0.14	0.0264	32.8	3.1	0.6	0.6	0.1	7.90	50.6	152.1	13.3	4.08388521	7.777777778	10.32222222
942	0	400	1	0	F	87	2	0	7.34	5.44	16.8	90.3	251	0	6.22	0.46	0.64	0	0.02	8.7	0.04	0.0354	31.3	6.4	1.5	0.2	0.3	16.10	45.6	156.5	10.9	0.84317032	2.173913043	13.52173913
943	0	400	0	1	F	87	3	0	4.95	4.5	13.8	92.2	210	0	3.94	0.59	0.4	0	0.02	10.2	0.06	0.0261	32	5.7	1.2	1	0.3	12.00	48.8	154.5	11.9	2.005730659	3.389830508	6.677966102
944	0	400	0	4	F	87	6	0	7.08	4.51	13.7	94	239	0	5.72	0.88	0.32	0.13	0.03	10.2	0.09	0.0203	31.8	6.5	1.3	0.9	0.3	15.50	49.8	150.4	9.1	19.41391941	3.409090909	6.5
945	0	401	1	4	M	53	9	1	6.71	3.85	11.4	91.7	107	0	5.43	0.69	0.47	0.1	0.02	17.4	0.12	0.0158	29.1	7.9	1.3	-1	0.2	8.50	57.8	143.2		23.39449541	8.695652174	7.869565217
946	0	401	0	5	M	53	10	1	6.12	3.75	11.1	92.3	80	0.01	4.51	0.9	0.58	0.11	0.02	12.2	0.11	0.0143	29	10.7	1.2	-0.7	0.3	8.60	56.5	143.1		9.803921569	7.777777778	5.011111111
947	0	401	0	6	M	53	11	1	5.97	3.56	10.5	94.7	61	0.01	4.27	0.97	0.58	0.13	0.02	19.6	0.19	0.0114	27.1	16.2	1	-2.2	0.6	9.90	56.4	144.3	15.5	7.102803738	7.216494845	4.402061856
948	0	401	0	7	M	53	12	1	6.94	3.77	11	95.5	72	0	5.22	1	0.61	0.1	0.01	16.0	0.16	0.0158	29.6	16.4	0.8	-0.4	0.2	11.80	56	146.7	23	4.87804878	8	5.22
949	0	401	0	8	M	53	13	1	8.95	3.64	10.7	89.8	104	0.01	6.82	1.23	0.79	0.09	0.02	12.2	0.15	0.0171	29.8	13.3	1.5	0	0.2	13.80	55.3	149.6	19.5	6.770098731	6.504065041	5.544715447
950	0	402	1	3	M	85	5	0	5.16	3.49	11.7	98.3	124	0	3.2	1.25	0.41	0.29	0.01	11.2	0.14	0.0213	31.7	6.9	0.9	-0.8	0.4	8.60	52	149.4	24.8	11.74863388	16.8	2.56
951	0	403	1	2	M	77	7	0	11.87	5.17	15.9	89.7	358	0	10.08	1.07	0.7	0	0.02	9.3	0.1	0.0626	32.5	5.8	1.2	0.9	0.1	20.80	51.3	153.1		4.006410256	7.476635514	9.420560748
952	0	404	1	2	M	71	5	0	7.99	4.68	14.7	90.4	341	0.01	6.28	1.42	0.27	0	0.02	4.9	0.07	0.0374	33.8	6.8	1.2	1.8	0.2	23.20	50	153.2		20.08547009	5.633802817	4.422535211
953	0	405	1	2	F	55	5	1	6.62	3.66	11.3	93.7	180	0	4.86	1.23	0.51	0.01	0.01	1.6	0.02	0.0597	31.2	4.7	0.8	0.6	0.2	8.50	51	161.3	16.3	2.188183807	3.25203252	3.951219512
954	0	405	0	5	F	55	8	1	10.77	4.02	12.2	91.5	152	0.01	9.74	0.79	0.23	0	0.01	8.9	0.07	0.0438	29.3	6.7	1.1	-1.5	0.1	10.20	53.1	159.5	16.5	7	8.860759494	12.32911392
955	0	405	0	5	F	55	8	1	12.52	4.31	12.9	93	183	0	10.58	1.56	0.37	0	0.01	8.3	0.13	0.0474	29.3	7	1	-1.4	0.1	12.80	51.2	159.2	12.2	10	5.128205128	6.782051282
956	0	405	0	6	F	55	9	1	8.46	3.64	11.1	95.6	139	0.01	7.42	0.88	0.12	0.03	0.01	4.5	0.04	0.0379	27.8	6.2	0.9	-2.7	0.1	8.60	52.4	156	8	13.27433628	3.409090909	8.431818182
957	0	406	1	0	F	71	14	1	7.64	5.02	13.8	83.5	288	0	6.56	0.7	0.37	0	0.01	5.7	0.04	0.0412	27.7	2.8	4.9	-1.2	0.4	8.10	55.7	156.5	8.6	5.182926829	2.857142857	9.371428571
958	0	406	0	2	F	71	15	1	9.78	4.42	12.3	87.6	329	0.01	8.55	0.83	0.39	0	0.01	10.8	0.09	0.0336	26.3	1.8	3.6	-2.1	0.8	5.90	55.6	149.7	13.3	15.16853933	6.024096386	10.30120482
959	0	406	0	3	F	71	16	1	8.74	4.06	11.2	88.2	337	0.02	7.45	0.95	0.34	0	0	10.5	0.1	0.024	25.5	1.5	3.9	-2.7	1.4	5.10	55.7	146.6	11.6	10.26490066	4.210526316	7.842105263
960	0	406	0	4	F	71	17	1	9.62	4.02	11.1	88.3	356	0.02	7.58	1.71	0.31	0.01	0.01	8.8	0.15	0.0233	28.8	1.6	3.5	0.5	0.7	5.70	54.9	145.7	8.2	10.67615658	4.678362573	4.432748538
961	0	407	1	2	M	75	4	0	4.74	3.32	10.9	96.4	160	0	3.92	0.5	0.31	0	0.01	4.0	0.02	0.0216	33.3	5.8	1.5	0.2	0.1	9.30	48.8	159.4	6	0.362318841	2	7.84
962	0	407	0	6	M	75	8	0	9.83	3.32	11.1	94	223	0.01	9.38	0.27	0.17	0	0.01	318.5	0.86	0.0232	30.9	5.8	2.2	-2	0.6	12.90	55.1	155	7.4	11.9205298	3.703703704	34.74074074
963	0	407	0	7	M	75	9	0	9.56	3.28	10.9	97	238	0.02	9.14	0.21	0.2	0	0.01	71.4	0.15	0.0223	32	6.4	1.6	-1	0.2	15.20	57.3	154.9	19	8.571428571	9.523809524	43.52380952
964	0	407	0	9	M	75	11	0	8.06	3.64	12	95.1	306	0.03	7.55	0.29	0.2	0.01	0.01	72.4	0.21	0.0244	30	6.8	2	-2.8	1.1	20.80	54.1	152.9	24.1	4.519774011	17.24137931	26.03448276
965	0	407	0	13	M	75	15	0	11.16	3.05	10.2	96.1	446	0.03	10.33	0.47	0.28	0.07	0.01	48.9	0.23	0.0726	31.1	6.4	1.6	-2	0.2	28.50	51.1	159.2	19.1	3.984063745	8.510638298	21.9787234
966	0	408	1	0	M	73	10	0	6.06	4.49	14	95.3	141	0	4.46	1.04	0.55	0	0.01	4.8	0.05	0.0242	31.2	7.3	0.5	-0.8	0.05	10.30	53.3	154.4	6.7	1.851851852	3.846153846	4.288461538
967	0	408	0	3	M	73	13	0	6.65	4.02	12.7	92.5	201	0	5.04	0.72	0.8	0.08	0.01	9.7	0.07	0.0277	31.9	6.8	0.6	0	0.1	13.70	52.1	153.4	11.1	3.418803419	6.944444444	7
968	0	409	1	2	M	75	7	0	6.5	3.53	8.9	83.3	365	0	4.5	1.1	0.7	0.19	0.01	8.2	0.09	0.0346	20.7	6.3	5.4	-4.8	4.9	23.00	50.8	151.9		7.142857143	6.363636364	4.090909091
969	0	409	0	5	M	75	16	0	7.14	3.63	9.1	82.4	665	0.02	4.51	1.36	0.82	0.42	0.03	12.5	0.17	0.0505	22.8	5.1	6.2	-2.8	4.2	33.90	49.3	148	19.1	4.200542005	11.02941176	3.316176471
970	0	410	1	0	M	74	6	0	5.88	4.54	14.8	95.4	284	0	5.01	0.53	0.34	0	0	5.7	0.03	0.0254	37.3	4	0.6	4.1	0.2	11.40	49.8	153.3	17	6.930693069	9.433962264	9.452830189
971	0	410	0	2	M	74	9	0	7.31	4.37	14.3	95.7	338	0	6.54	0.37	0.39	0	0.01	10.8	0.04				0.8				50.8	151.6	18.9	3.438395415	13.51351351	17.67567568
972	0	411	1	0	F	62	4	0	5.13	4.34	13.8	92.9	146	0	4.3	0.5	0.31	0.01	0.01	6.0	0.03	0.0408	31.7	4.9	0.5	-0.7	0.05	7.20	50.4	155.9	8	2.247191011	2	8.6
973	0	412	1	2	F	63	7	1	4.05	3.78	11.2	89.4	317	0	3.46	0.46	0.12	0.01	0	8.7	0.04	0.0284	31	1.4	2	0.3	0.2	4.40	48.9	154.2	2.2	0.980392157	0	7.52173913
974	0	412	0	5	F	63	10	1	5.85	3.59	10.8	93.6	438	0.01	4.64	1.02	0.16	0.01	0.02	21.6	0.22	0.032	29.9	1.5	1.6	-0.6	0.3	6.60	54.8	146	12.7	11.80555556	7.843137255	4.549019608
975	0	412	0	6	F	63	11	1	7.18	3.38	10	95.6	494	0.02	5.73	1.17	0.23	0.04	0.01	23.9	0.28	0.0291	28.1	1.5	1.3	-2.3	0.4	7.40	56.8	143.3		24.05660377	11.11111111	4.897435897
976	0	413	1	0	M	68	8	1	5.62	4.31	13.3	84.2	277	0	4.71	0.63	0.27	0	0.01	9.5	0.06	0.0203	31.5	3.9	1.8	0	0.1	10.80	51.2	156.5	3.2	1.282051282	0	7.476190476
977	0	413	0	3	M	68	11	1	8.23	3.46	10.7	87.6	321	0.01	7.35	0.59	0.25	0.04	0	28.8	0.17	0.0218	32.9	3.9	1.4	1.5	0.3	12.50	56.9	149.7	13.6	18.18181818	6.779661017	12.45762712
978	0	413	0	4	M	68	12	1	10.36	3.29	10.2	89.7	372	0.01	9.27	0.59	0.42	0.07	0.01	35.6	0.21	0.0197	33.2	4.6	1.1	1.7	0.2	17.10	58.4	151.3	15.3	19.04761905	5.084745763	15.71186441
979	0	413	0	5	M	68	13	1	8.08	3.39	10.4	89.1	457	0.01	6.98	0.5	0.49	0.1	0.01	40.0	0.2	0.0207	32.5	3.8	1.4	1.1	0.2	17.40	55.3	151.6	14	9.843400447	4	13.96
980	0	413	0	6	M	68	14	1	8.03	3.35	10.4	92.2	510	0.02	6.71	0.6	0.61	0.09	0.02	56.7	0.34	0.0241	30	3.3	0.9	-1.4	0.2	16.80	55.6	149.4	21.7	6.921675774	6.666666667	11.18333333
981	0	413	0	7	M	68	15	1	8.37	3.33	10.3	94	584	0.01	6.76	0.81	0.69	0.09	0.02	37.0	0.3	0.026	29.2	3	0.9	-2.1	0.2	17.50	54.8	151.3	23.5	4.769475358	4.938271605	8.345679012
982	0	414	1	1	F	78	5	0	7.06	4.13	12.2	88.9	291	0	5.43	1.35	0.26	0	0.02	1.5	0.02				2.2				49.7	153.2		4.680851064	4.444444444	4.022222222
983	0	415	1	1	F	72	4	0	7.23	4.59	13.4	86.5	167	0.01	5.93	1.02	0.26	0	0.02	7.8	0.08	0.0358	28.1	3.707179728	2.7	-1.5	0.3	21.54	46.6	148.7	5.9	0.881057269	2.941176471	5.81372549
984	0	416	1	0	F	72	4	0	6.2	4.87	14.5	86.4	216	0	4.91	0.87	0.42	0	0	3.4	0.03	0.0419	23.3	8.235687981	2.3	-7.1	0.4	14.69	50.9	152.6	9.2	1.917808219	3.448275862	5.643678161
985	0	416	0	1	F	72	5	0	5.58	4.68	13.8	88.2	197	0	4.31	0.97	0.29	0	0.01	1.0	0.01				1.9				51.5	151.9	6.2	2.788844622	2.06185567	4.443298969
986	0	417	1	0	F	66	17	0	11.22	4.04	12.8	96	593	0	7.94	2.32	0.82	0.1	0.04	6.0	0.14	0.0659	30.2	2.03777336	0.7	-0.9	0.7	128.09	47	149	13.8	1.404494382	3.017241379	3.422413793
987	0	417	0	1	F	66	18	0	11.14	3.75	12.2	97.9	546	0	7.77	2.21	0.98	0.14	0.04	4.5	0.1				0.6				47.4	148.6	12.2	0.796359499	1.809954751	3.515837104
988	0	417	0	2	F	66	19	0	12.19	3.93	12.5	101	586	0	8.95	2.15	0.91	0.14	0.04	5.1	0.11				0.4				50.2	149.9	14.9	1.376720901	1.860465116	4.162790698
989	0	417	0	4	F	66	20	0	11.54	3.74	11.9	98.7	530	0	8.69	1.79	0.96	0.08	0.02	3.9	0.07				0.5				49.9	150.2	16.8	0.588235294	2.234636872	4.854748603
990	0	417	0	7	F	66	23	0	9.55	3.67	11.6	97.3	537	0	6.49	1.94	0.98	0.09	0.05	3.1	0.06				0.4				47.3	154.6	9.8	0.663716814	2.06185567	3.345360825
991	0	417	0	9	F	66	25	0	9.05	3.77	12	98.9	529	0	5.96	2.12	0.83	0.09	0.05	4.2	0.09				0.4				48.2	155	9.4	0.815217391	1.41509434	2.811320755
992	0	418	1	13	F	75	1	0	8.82	4.21	11.9	90.7	315	0	7.37	0.99	0.44	0.01	0.01	8.1	0.08				2.5				53.7	159.6		4.935064935	2.02020202	7.444444444
993	0	418	0	14	F	75	3	0	6.45	3.74	10.9	88.2	262	0	5.47	0.71	0.25	0.02	0	4.2	0.03				3.3				52.1	158.5		4.424778761	4.225352113	7.704225352
994	0	418	0	17	F	75	4	0	6.16	3.61	10.4	90.3	302	0	5.29	0.54	0.26	0.06	0.01	5.6	0.03				2.5				56.8	159.5	13	14.9122807	7.407407407	9.796296296
995	0	418	0	18	F	75	5	0	5.4	3.51	9.9	90.3	349	0.01	4.45	0.59	0.29	0.06	0.01	5.1	0.03				2.4				54.7	157.6	11.9	9.274193548	5.084745763	7.542372881
996	0	418	0	19	F	75	6	0	7.1	3.55	10.4	89.3	468	0	6.19	0.39	0.39	0.12	0.01	17.9	0.07				2.7				52.2	155.3	15.4	6.705539359	7.692307692	15.87179487
997	0	418	0	21	F	75	8	0	5.3	3.4	9.8	88.8	523	0.01	4.33	0.5	0.31	0.14	0.02	14.0	0.07				2.9				53.2	153.7	14	2.909090909	2	8.66
998	0	418	0	24	F	75	11	0	6.49	3.55	10.2	87.9	703	0.05	5.42	0.51	0.47	0.06	0.03	31.4	0.16				3.6				51.6	153.9	11.8	0.715990453	0	10.62745098
999	0	418	0	26	F	75	12	0	8.93	3.97	11	90.2	806	0.08	6.57	1.36	0.9	0.06	0.04	16.9	0.23				3.2				52.5	159.5	5.9	2.686202686	0	4.830882353
1000	0	419	1	0	M	76	14	0	4.68	4.23	12.8	89.4	332	0	3.29	0.82	0.49	0.07	0.01	1.2	0.01				1.8				46.8	147.7	7.3	0.457665904	3.658536585	4.012195122
1001	0	419	0	2	M	76	16	0	5.46	4.07	11.7	90.9	382	0	4.29	0.65	0.43	0.08	0.01	6.2	0.04				1.6				50.8	147.9	15.4	2.03562341	7.692307692	6.6
1002	0	419	0	3	M	76	17	0	6.2	4.26	12.5	91.1	461	0	4.63	0.95	0.5	0.11	0.01	3.2	0.03				1.7				48.9	146.5	8.4	0.907029478	4.210526316	4.873684211
1003	0	420	1	0	F	71	11	1	6.98	4.81	14.9	95.2	166	0.01	6.1	0.54	0.32	0	0.02	11.1	0.06				0.7				48.5	156	9.3	1.360544218	5.555555556	11.2962963
1004	0	420	0	1	F	71	11	1	5.92	4.62	14.1	93.5	158	0.02	4.65	0.94	0.28	0.02	0.03	11.7	0.11				0.9				53.3	153.8	8.5	8.75	3.191489362	4.946808511
1005	0	421	1	0	M	85	14	1	7.65	2.54	7.6	93.7	137	0	6	1.27	0.37	0	0.01	5.5	0.07				1				54	149.5		26.20481928	2.362204724	4.724409449
1006	0	421	0	0	M	85	14	1	6.86	2.27	7	92.1	127	0	5.88	0.66	0.3	0.01	0.01	7.6	0.05				1.3				53.2	148.6	6.1	27.54716981	0	8.909090909
1007	0	422	1	0	M	87	5	1	12.87	4.63	13.6	89.2	178	0	12.09	0.38	0.37	0	0.03	26.3	0.1	0.0375	26	3.241349102	1.8	-4	0.2	17.62	47.3	158.9	13.2	2.694610778	2.631578947	31.81578947
1008	0	422	0	1	M	87	6	1	11.49	3.94	11.5	90.1	174	0	10.43	0.37	0.67	0	0.02	32.4	0.12				1.4				49.4	163	10.8	2.684563758	2.702702703	28.18918919
1009	0	422	0	2	M	87	7	1	12.4	4.49	12.9	90.6	216	0	11.44	0.37	0.57	0	0.02	13.5	0.05				1.5				53.2	161	5.4	0.784313725	0	30.91891892
1010	0	423	1	0	M	79	7	1	11.05	5.77	17.7	92.4	172	0	9.64	0.67	0.73	0	0.01	10.4	0.07	0.056	26.5	14.170233	1.1	-3.9	1	10.49	47.6	146.2	17.9	3.459119497	10.44776119	14.3880597
1011	0	423	0	2	M	79	9	1	11.87	5	15.2	91.4	183	0	11.13	0.35	0.38	0	0.01	17.1	0.06				0.8				50.6	147.1	20	7.185628743	11.42857143	31.8
1012	0	423	0	4	M	79	11	1	13.83	5.31	16.2	93.4	261	0	12.8	0.57	0.42	0.02	0.02	31.6	0.18				0.8				52.9	146.7		4.08719346	12.28070175	22.45614035
1013	0	424	1	0	M	75	12	0	5.75	4.81	14	86.3	267	0	4.63	0.72	0.39	0	0.01	5.6	0.04	0.0241	28.3	4.08997955	3.5	-0.6	0.5	18.42	49.4	154.3	12.5	6.606606607	4.166666667	6.430555556
1014	0	424	0	1	M	75	13	0	5.18	4.65	13.6	87.3	278	0	4.2	0.75	0.22	0	0.01	4.0	0.03				3.2				49.9	152.2		12.30769231	5.333333333	5.6
1015	0	424	0	5	M	75	17	0	7.78	4.98	14.5	88.2	537	0	6.73	0.57	0.46	0.01	0.01	8.8	0.05				3.2				52.1	144.6	17.5	1.216545012	10.52631579	11.80701754
1016	0	424	0	7	M	75	19	0	9.05	4.73	13.6	87.9	604	0	7.95	0.56	0.49	0.04	0.01	14.3	0.08				3.2				49	146.5	16.1	0.928074246	5.357142857	14.19642857
1017	0	425	1	12	M	67	12	1	20.09	4.85	16.3	95.9	142	0.01	18.62	1.19	0.2	0.02	0.06	65.5	0.78				1.4				50.7	142.5		46.9273743	7.56302521	15.64705882
1018	0	426	1	0	M	84	5	1	4.78	4.76	14.7	97.3	118	0	3.04	0.97	0.74	0.01	0.02	2.1	0.02				1.1				49.3	159.6	10.3	1.470588235	4.12371134	3.134020619
1019	0	427	1	0	M	53	13	1	11.3	4.74	15	88.2	225	0	10.34	0.68	0.26	0	0.02	13.2	0.09	0.0318	30.5	5.504284773	1.4	-1.4	0.1	26.78	47.2	152.5		5.063291139	8.823529412	15.20588235
1020	0	427	0	1	M	53	14	1	10.35	4.64	14.4	90.5	244	0	9.42	0.74	0.18	0	0.01	13.5	0.1				1.1				51.8	152.8		9.395973154	5.405405405	12.72972973
1021	0	428	1	0	M	48	6	0	3.86	5.03	14.9	88.1	141	0	2.14	1.43	0.27	0.01	0.01	1.4	0.02				1.5				54.7	157.6		5.882352941	2.097902098	1.496503497
1022	0	428	0	3	M	48	9	0	5.25	4.85	14.6	87.8	156	0	4.17	0.81	0.26	0	0.01	3.7	0.03				1.5				50.1	152.4	4.9	3.375527426	2.469135802	5.148148148
1023	0	428	0	4	M	48	10	0	8.46	5.04	14.9	88.5	202	0	7.05	1.04	0.34	0.01	0.02	5.8	0.06				1.2				53.4	152.4		4.377104377	3.846153846	6.778846154
1024	0	428	0	6	M	48	12	0	4.95	4.9	14.5	88.6	296	0	3.21	1.22	0.41	0.1	0.01	4.9	0.06				1.3				54.2	152.7		7.446808511	9.016393443	2.631147541
1025	0	429	1	0	F	77	11	1	5.07	3.84	12.7	99.7	217	0	3.55	0.86	0.65	0	0.01	1.2	0.01	0.0269	33.4	4.447632712	0.5	0.4	0.1	13.67	47.4	155	8.1	1.733102253	1.162790698	4.127906977
1026	0	429	0	1	F	77	12	1	4.19	3.79	12.2	99.5	223	0	2.34	1.37	0.47	0	0.01	1.5	0.02				0.4				50.4	155.5	9.5	3.676470588	1.459854015	1.708029197
1027	0	429	0	2	F	77	13	1	4.25	3.58	11.4	99.2	192	0	2.73	1.12	0.38	0	0.02	1.8	0.02				0.5				48.9	153.7	9.8	7.331378299	0.892857143	2.4375
1028	0	429	0	5	F	77	16	1	4.29	3.53	11.5	99.7	204	0.01	2.69	1.22	0.36	0.01	0.01	1.6	0.02				0.3				52.5	152.6	12.3	12.62135922	0.819672131	2.204918033
1029	0	429	0	8	F	77	19	1	7.36	3.46	11.2	100.9	338	0	5.5	1.23	0.57	0.04	0.02	7.3	0.09				0.3				46.8	147.3	5.7	1.949317739	2.43902439	4.471544715
1030	0	429	0	11	F	77	22	1	11.35	3.3	10.7	99.1	444	0	8.63	1.29	1.29	0.12	0.02	10.1	0.13				0.4				45.6	151.1	14	4.458598726	4.651162791	6.689922481
1031	0	430	1	1	M	73	6	1	7.65	3.95	11.7	91.1	180	0.01	6.88	0.55	0.2	0	0.02	5.5	0.03				1.1				55.2	158.7		17.81609195	3.636363636	12.50909091
1032	0	431	1	0	M	58	10	0	4.74	5.17	16.5	91.9	104	0	3.27	0.83	0.56	0.07	0.01	1.2	0.01	0.0424	32.1	6.401045069	0.9	-0.1	0.1	12.69	50.3	155.6	7.2	0.210084034	1.204819277	3.939759036
1033	0	432	1	0	M	71	4	0	23.24	4.68	15	95.7	282	0	20.76	1.02	1.42	0	0.04	14.7	0.15				0.9				54	156.7	5.9	1.370967742	0.980392157	20.35294118
1034	0	432	0	1	M	71	5	0	20.3	4.1	13.1	97.3	205	0	18.58	0.77	0.91	0.01	0.03	20.8	0.16				0.8				53.7	157.1	6.5	5.919395466	1.298701299	24.12987013
1035	0	432	0	3	M	71	7	0	14.69	4.26	13.8	99.3	255	0	11.32	2.16	1.11	0.07	0.03	5.6	0.12	0.0469	26.8	1.833616299	0.7	-4.8	0.2	43.10	51	155.4	7.9	1.03950104	0.925925926	5.240740741
1036	0	433	1	0	M	54	11	0	6.52	4.82	14.2	90.2	344	0	4.88	0.83	0.73	0.06	0.02	3.6	0.03	0.0299	31.4	3.79246161	0.9	1.5	0.1	19.61	48.3	146.4	14.5	1.240310078	6.024096386	5.879518072
1037	0	433	0	1	M	54	12	0	5.74	4.21	12.6	91	343	0	3.96	0.99	0.62	0.15	0.02	3.0	0.03				0.8				50.7	144.8	16.2	1.654411765	7.070707071	4
1038	0	433	0	2	M	54	13	0	3.96	4.08	12.5	92.2	396	0	2.65	0.81	0.37	0.12	0.01	4.9	0.04				0.7				49.1	142.3	17.3	1.488095238	7.407407407	3.271604938
1039	0	434	1	0	M	71	11	0	7.42	3.73	13	101.6	338	0	6.66	0.57	0.13	0.04	0.02	63.2	0.36	0.0224	30.2	12.14319139	0.8	-4.5	1.2	29.07	47.6	149.7		6.25	3.50877193	11.68421053
1040	0	434	0	1	M	71	12	0	6.53	3.14	10.8	103.5	342	0.01	5.8	0.46	0.19	0.05	0.03	54.3	0.25				0.9				50.2	149.1		4.046242775	6.52173913	12.60869565
1041	0	434	0	3	M	71	14	0	6.21	3	10.3	106	386	0	5.32	0.55	0.24	0.05	0.05	70.9	0.39				0.7				50.4	149.2		3.255813953	7.272727273	9.672727273
1042	0	434	0	5	M	71	16	0	9.62	3.24	10.9	106.8	497	0.01	8.39	0.61	0.48	0.11	0.03	91.8	0.56				0.6				50.6	150.4	24.6	2.830188679	8.196721311	13.75409836
1043	0	434	0	7	M	71	18	0	12.78	3.29	11.4	107	602	0.01	10.99	0.93	0.71	0.07	0.08	61.3	0.57				0.9				48	152.8	19.4	0.805152979	7.52688172	11.8172043
1044	0	435	1	8	M	74	11	0	9.21	4.62	13	94.6	268	0.02	7.95	0.51	0.7	0.01	0.04	94.1	0.48				2.7				51.8	160.6	15.7	4.020100503	0	15.58823529
1045	0	435	0	11	M	74	14	0	11.08	4.35	12.3	94	236	0.01	9.09	1.23	0.63	0.06	0.07	17.1	0.21				2.8				54.5	161.6	7.3	0.347222222	0.81300813	7.390243902
1046	0	436	1	0	M	57	7	1	6.19	4.95	15	87.1	221	0	4.43	1.36	0.39	0	0.01	0.7	0.01	0.0193	28.9	5.288627722	1.7	-1.5	0.5	7.07	44.5	144.8	5.1	0.862068966	2.205882353	3.257352941
1047	0	437	1	0	M	64	10	1	7.34	5.37	15.3	88.8	239	0	6.05	0.76	0.5	0.01	0.02	7.9	0.06	0.0279	29.9	8	2.4	1.2	0.4	25.33	54.9	155.4		3.764705882	10.52631579	7.960526316
1048	0	437	0	2	M	64	12	1	9.21	4.81	13.7	88.8	245	0	7.57	0.65	0.84	0.12	0.03	12.3	0.08				2.3				54.3	151.9	15.4	4.246575342	6.153846154	11.64615385
1049	0	438	1	0	F	74	12	0	3.63	4.9	15.5	97.3	186	0	1.93	1.1	0.55	0.04	0.01	1.8	0.02	0.0505	30.3	6.216328222	0.4	-1.1	0.2	14.51	45.9	154.1	6.4	1.803607214	2.727272727	1.754545455
1050	0	438	0	2	F	74	14	0	3.95	4.4	14.2	94.3	200	0	2.8	0.74	0.34	0.07	0	5.4	0.04				0.5				43.4	152.1	8.1	1	4.054054054	3.783783784
1051	0	438	0	4	F	74	16	0	4.65	4.79	15.2	95.2	253	0	3.19	0.87	0.4	0.17	0.02	5.7	0.05				0.4				45.1	150.6	10.3	1.366120219	4.597701149	3.666666667
1052	0	439	1	0	F	82	7	1	8.14	4.21	13.3	93.6	239	0	7.07	0.54	0.52	0	0.01	24.1	0.13	0.0198	32.4	4.963870562	1	0.5	0.1	36.57	48.9	155.7	18.5	2.127659574	12.96296296	13.09259259
1053	0	439	0	2	F	82	9	1	11.23	4.03	12.5	94.3	325	0	8.47	1.2	1.49	0.02	0.05	18.3	0.22				1				52.9	149.7	25.8	1.651651652	24.16666667	7.058333333
1054	0	440	1	2	F	74	4	0	4.99	4.78	14.2	90.6	188	0.01	3.48	1.05	0.44	0	0.02	1.9	0.02	0.0511	30.8	2.711585867	1.4	0.4	0.1	15.04	44.6	150.6	5.7	0.262467192	1.904761905	3.314285714
1055	0	441	1	0	F	89	12	0	9.01	3.6	11.3	95.6	335	0	7.57	1.02	0.38	0.03	0.01	14.7	0.15	0.0392	30.4	4.545454545	0.6	-1.1	0.2	42.21	45	145.6	17.6	3.293413174	4.901960784	7.421568627
1056	0	441	0	1	F	89	13	0	8.95	3.56	11.4	94.4	260	0	7.85	0.67	0.39	0.02	0.02	16.4	0.11				0.7				45.8	147.8	14.9	1.744186047	4.47761194	11.71641791
1057	0	441	0	3	F	89	15	0	6.94	3.47	11.6	96.5	304	0.01	5.24	1.09	0.46	0.11	0.04	11.0	0.12				0.7				42.7	143.1	15.6	1.904761905	4.587155963	4.80733945
1058	0	442	1	0	F	74	7	1	7.74	4.95	14.8	88.7	180	0	5.4	1.77	0.54	0.01	0.02	1.7	0.03				1.4				51.3	154.7	5.1	2.118644068	2.259887006	3.050847458
1059	0	442	0	1	F	74	8	1	8.84	4.96	14.4	89.7	170	0	5.55	2.68	0.59	0	0.02	1.5	0.04				1.3				53.6	155.2	7.8	3.300970874	2.985074627	2.070895522
1060	0	442	0	2	F	74	9	1	9.93	5.03	14.8	90.3	177	0	7.35	1.92	0.62	0.01	0.03	4.7	0.09				1.3				52.6	152.6	8.3	7.720588235	4.166666667	3.828125
1061	0	442	0	3	F	74	10	1	13.67	4.74	14	87.3	185	0	10.91	2.03	0.68	0.01	0.04	13.8	0.28				1.8				50.2	147.5	6.4	2.580645161	3.9408867	5.374384236
1062	0	442	0	6	F	74	13	1	18.81	5.2	15.2	91.5	350	0.11	16.06	1.89	0.79	0.01	0.06	35.4	0.67				1.5				51.8	148		3.941605839	12.6984127	8.497354497
1063	0	443	1	0	M	57	6	1	5.09	5.06	15.6	88.7	153	0	4.45	0.32	0.32	0	0	9.4	0.03	0.0309	28.5	3.763171099	1.4	-2.7	0.1	8.57	47.7	156.9	9.4	0.699300699	6.25	13.90625
1064	0	443	0	2	M	57	8	1	3.59	4.61	13.9	90.7	134	0	2.83	0.45	0.3	0	0.01	4.4	0.02				1.3				50.6	154.9	6.7	7.954545455	2.222222222	6.288888889
1065	0	443	0	4	M	57	10	1	4.26	4.32	12.6	91.7	165	0	3.38	0.53	0.33	0.01	0.01	9.4	0.05				1.2				49.4	152.8	5.7	14.18439716	0	6.377358491
1066	0	443	0	5	M	57	11	1	7.01	4.29	12.9	89	216	0	6.16	0.41	0.43	0	0.01	29.3	0.12				1.7				48	152.1	9.8	2.688172043	2.43902439	15.02439024
1067	0	444	1	0	F	54	10	1	6.95	4.2	13.7	91.2	355	0	5.01	1.23	0.65	0.04	0.02	4.1	0.05	0.0533	23.3	13.31694325	1.1	-8.7	0.9	28.40	49.4	147	14.6	1.946902655	10.56910569	4.073170732
1068	0	444	0	1	F	54	11	1	5.64	3.73	11.7	93.8	333	0	4.11	0.73	0.69	0.09	0.02	5.5	0.04				0.5				51.4	144.6	19.2	1.582278481	12.32876712	5.630136986
1069	0	445	1	0	M	81	4	0	3.66	3.06	9.8	98.4	115	0	2.61	0.89	0.16	0	0	2.2	0.02				0.5				47	145.6		4.316546763	2.247191011	2.93258427
1070	0	445	0	1	M	81	5	0	3.67	2.92	9.3	98.6	114	0	3.06	0.49	0.12	0	0	4.1	0.02				0.4				48.9	145.6		8.411214953	4.081632653	6.244897959
1071	0	445	0	6	M	81	10	0	4.39	2.86	8.9	101.7	236	0.01	3.19	0.84	0.28	0.08	0	8.3	0.07				0.3				52.9	139.7	22.6	4.149377593	8.333333333	3.797619048
1072	0	445	0	8	M	81	12	0	5.21	2.84	8.9	100.7	268	0.01	3.63	1.12	0.39	0.05	0.02	14.3	0.16				0.4				49.1	140.3	20.5	2.29226361	6.25	3.241071429
1073	0	445	0	10	M	81	14	0	5.37	3.07	9.5	107.5	232	0.01	3.56	1.3	0.44	0.05	0.02	10.0	0.13				0.3				52.1	141.2	8.5	1.256281407	2.307692308	2.738461538
1074	0	445	0	13	M	81	17	0	4.88	2.68	8.6	102.2	182	0	3.47	0.99	0.39	0.01	0.02	10.1	0.1				0.5				47.6	146.5	2	1.428571429	1.01010101	3.505050505
1075	0	446	1	2	M	81	12	1	3.75	4.19	13.3	95.2	186	0	2.18	0.99	0.51	0.06	0.01	1.0	0.01				0.4				50.1	166.3	8.1	1.5625	2.02020202	2.202020202
1076	0	446	0	6	M	81	16	1	4.63	4.43	14	96.8	219	0	2.4	1.42	0.6	0.2	0.01	0.7	0.01				0.5				49.4	161.3	9.9	5.970149254	3.521126761	1.690140845
1077	0	446	0	8	M	81	18	1	6.95	4.42	14.1	96.6	297	0	4.38	1.64	0.72	0.19	0.02	1.8	0.03				0.5				49.9	161.2	7.3	1.66163142	2.43902439	2.670731707
1078	0	446	0	11	M	81	21	1	7.75	4.09	13.2	95.6	362	0	5.51	1.21	0.81	0.19	0.03	3.3	0.04				0.4				49	162.4	9.9	1.111111111	2.479338843	4.553719008
1079	0	446	0	18	M	81	28	1	7.76	3.46	10.9	99.1	331	0	5.09	1.1	1.02	0.5	0.05	3.6	0.04				0.4				51.3	162	17.3	1.235955056	2.727272727	4.627272727
1080	0	446	0	20	M	81	30	1	9.37	3.76	11.8	97.6	383	0	6.83	1.12	1.08	0.3	0.04	3.6	0.04				0.5				50.9	161.5	17	1.317122594	2.678571429	6.098214286
1081	0	447	1	1	F	86	5	0	4.97	3.17	10.1	97.2	231	0	4.45	0.36	0.14	0.02	0	8.3	0.03				0.7				54.6	148.3		14.96062992	8.333333333	12.36111111
1082	0	447	0	3	F	86	7	0	6.09	3.29	10.4	97.6	315	0	5.28	0.44	0.29	0.07	0.01	18.2	0.08				0.7				55.8	148.5	18.2	5.639097744	11.36363636	12
1083	0	447	0	6	F	86	10	0	6.79	3.42	11	98.8	478	0	5.63	0.69	0.34	0.12	0.01	8.7	0.06				0.6				52	148.7	21.7	1.597444089	4.347826087	8.15942029
1084	0	447	0	8	F	86	12	0	6.8	3.34	10.8	99.7	507	0	5.33	0.86	0.44	0.14	0.03	5.8	0.05				0.5				53	155.6	19.8	1.041666667	3.488372093	6.197674419
1085	0	447	0	10	F	86	14	0	7.22	3.41	10.7	100.9	477	0	5.83	0.73	0.41	0.22	0.03	2.7	0.02				0.5				53.9	157.1	19.2	0.842696629	2.739726027	7.98630137
1086	0	447	0	13	F	86	17	0	5.85	3.82	12.3	101.8	505	0	4.44	0.73	0.47	0.16	0.05	5.5	0.04				0.5				47.9	155.5	9.6	0.242718447	1.369863014	6.082191781
1087	0	448	1	0	M	55	9	0	11.12	5.53	17.8	90.2	157	0	9.31	1.06	0.73	0	0.02	4.7	0.05	0.0359	33.5	7.6	1.3	0.9	0.1	8.32	48.4	151.8	8.5	0.609756098	3.773584906	8.783018868
1088	0	448	0	2	M	55	11	0	4.88	4.93	15.7	94.9	207	0	3.08	1.05	0.65	0.08	0.02	1.0	0.01				0.7				48.9	149.9	9.5	0.695652174	5.714285714	2.933333333
1089	0	449	1	0	M	52	9	0	11.28	5.02	14.7	88.8	201	0.01	10.18	0.73	0.36	0	0.01	6.8	0.05	0.0251	29.2	8.911345889	1.6	0.1	0.2	12.66	48.2	153.3	6.8	2.208201893	2.739726027	13.94520548
1090	0	449	0	1	M	52	10	0	14.21	4.77	13.8	90.1	265	0	13.12	0.74	0.34	0	0.01	17.6	0.13				1.4				53.2	155.7	5.4	8.754208754	2.702702703	17.72972973
1091	0	449	0	4	M	52	13	0	10.21	4.77	13.8	92.2	448	0.01	8.77	0.8	0.56	0.02	0.06	60.0	0.48				1.2				55.1	153.5	15	2.697095436	10	10.9625
1092	0	449	0	6	M	52	15	0	12.45	4.36	12.6	89.9	565	0	10.28	1.02	1.01	0.08	0.06	100.0	1.02				1.3				52.2	155	13.7	0.681044268	3.921568627	10.07843137
1093	0	449	0	8	M	52	17	0	11.3	4.64	13.7	91.6	750	0	8.78	1.52	0.71	0.16	0.13	51.3	0.78				1.1				48.9	155.6	11.2	0.476947536	3.947368421	5.776315789
1094	0	450	1	0	F	83	5	0	11.11	4.37	13.4	92.7	268	0	10.3	0.48	0.32	0	0.01	37.5	0.18	0.0319	24.9	7.219892151	1.2	-4.9	0.5	29.21	50.3	150.3	14.6	2.898550725	6.25	21.45833333
1095	0	450	0	2	F	83	7	0	7.27	4.26	12.7	96.2	245	0	6.13	0.79	0.27	0.04	0.04	24.1	0.19				0.9				52.8	147.7		9.016393443	8.860759494	7.759493671
1096	0	450	0	3	F	83	8	0	10.3	4.49	13.5	94.4	403	0	8.86	1	0.29	0.1	0.05	43.0	0.43				0.9				50.5	148.7	16	2.008032129	7	8.86
1097	0	450	0	5	F	83	10	0	10.74	4.16	12.7	93.5	399	0.01	9.19	1.08	0.22	0.18	0.07	50.9	0.55				0.9				47.2	149.7	10.2	1.025641026	0.925925926	8.509259259
1098	0	451	1	0	F	75	13	0	9.71	5.2	15.1	85.8	334	0	7.44	1.38	0.82	0.06	0.01	2.9	0.04				1.5				44.7	142.5	15.2	1.095890411	5.072463768	5.391304348
1099	0	452	1	0	M	43	7	1	20.17	4.92	14.8	86.6	249	0	17.98	1.04	1.12	0	0.03	19.2	0.2				1.5				44.3	143.9	5.8	0.604229607	1.923076923	17.28846154
1100	0	453	1	0	M	78	12	1	7.33	4.93	15.5	90.7	172	0	6.42	0.62	0.28	0	0.01	9.7	0.06	0.036	32.4	12.97587131	1.8	0.2	0.1	14.62	47.3	152.4	6.5	0.790513834	4.838709677	10.35483871
1101	0	453	0	4	M	78	16	1	10.38	5.09	15.3	91	250	0.01	9.46	0.49	0.26	0.15	0.02	18.4	0.09				1.6				50.1	149.6		5.286343612	8.163265306	19.30612245
1102	0	453	0	6	M	78	18	1	8.64	4.81	14.5	91.1	227	0	7.82	0.34	0.31	0.15	0.02	41.2	0.14				1.7				48.9	147.3	26.5	5.818181818	14.70588235	23
1103	0	453	0	8	M	78	20	1	9.25	4.68	14.3	90.8	223	0	8.46	0.41	0.25	0.1	0.03	85.4	0.35				1.6				50.6	151.4	26.8	6.018518519	9.756097561	20.63414634
1104	0	454	1	7	M	63	14	0	10.52	4.15	13.5	98.1	515	0	8.51	1.13	0.53	0.27	0.08	31.9	0.36				0.6				51.9	154.8	17.7	1.694915254	6.194690265	7.530973451
1105	0	454	0	10	M	63	17	0	10.67	4.45	14.4	99.3	541	0	8.01	1.87	0.56	0.14	0.09	8.6	0.16				0.6				51.1	155.9	9.1	0.785854617	3.20855615	4.28342246
1106	0	455	1	0	F	56	7	1	9.18	4.92	14	89.8	228	0	7.09	1.59	0.48	0	0.02	11.3	0.18	0.0477	25.4	3.993055556	2.2	-2.4	0.7	33.52	50.2	150.6	6.9	0.99009901	1.257861635	4.459119497
1107	0	455	0	2	F	56	9	1	7.21	4.51	12.8	89.8	229	0	5.79	0.85	0.53	0	0.04	17.6	0.15				2.2				50.5	147.3	9.4	0.835073069	4.705882353	6.811764706
1108	0	455	0	4	F	56	11	1	13.08	4.43	12.8	87.8	309	0	11.32	0.77	0.95	0	0.04	24.7	0.19				2.5				50.9	150.5	10.4	0.825471698	5.194805195	14.7012987
1109	0	456	1	0	M	85	3	0	8.98	5.22	15.4	83.7	183	0	8.39	0.49	0.08	0	0.02	6.1	0.03				3.1				50.8	149.7		12	2.040816327	17.12244898
1110	0	456	0	4	M	85	7	0	9.73	4.39	12.4	87.9	261	0	6.63	1.64	1.22	0.19	0.05	36.6	0.6				2.2				48.8	143.6	16.5	2.262443439	3.048780488	4.042682927
1111	0	457	1	1	M	64	14	0	3.36	4.65	13.3	90.5	130	0.01	2.38	0.68	0.28	0.01	0.01	4.4	0.03				1.9				53.1	149.8		3.474903475	1.470588235	3.5
1112	0	457	0	3	M	64	16	0	4.47	4.69	13.8	87.8	163	0	3.42	0.75	0.26	0.02	0.02	5.3	0.04				2.6				52.4	152.4		3.829787234	1.333333333	4.56
1113	0	457	0	5	M	64	18	0	4.72	4.46	13	89.7	167	0.01	3.48	0.8	0.38	0.05	0.01	6.3	0.05				2				51	154.2	10	5.487804878	2.5	4.35
1114	0	457	0	8	M	64	21	0	5.38	4.15	11.9	90.6	223	0	4.14	0.68	0.51	0.03	0.02	8.8	0.06				1.9				47.8	154	19.1	1.746724891	2.941176471	6.088235294
1115	0	457	0	10	M	64	23	0	5.38	4.31	12.3	90	285	0	3.63	0.93	0.64	0.12	0.06	6.5	0.06				1.9				47.8	153.7	14	0.512820513	2.150537634	3.903225806
1116	0	457	0	12	M	64	25	0	6.94	4.51	12.7	91.1	292	0	4.8	1.33	0.73	0.04	0.04	5.3	0.07				1.6				47.4	155.6	18.8	0.635930048	1.503759398	3.609022556
1117	0	458	1	0	F	78	7	0	6.04	4.39	13.7	93.8	247	0	4.64	0.85	0.48	0.06	0.01	3.5	0.03	0.025	30.7	3.30953926	0.6	-0.2	0.1	10.62	48.7	152.6	14.1	2.211302211	8.235294118	5.458823529
1118	0	458	0	1	F	78	8	0	5.13	3.86	12.1	93.8	246	0	3.49	1.04	0.5	0.08	0.02	2.9	0.03				0.6				48.8	151.3	11.5	1.856148492	3.846153846	3.355769231
1119	0	459	1	0	M	75	11	1	7.84	4.7	13.6	88.7	243	0	6.65	0.51	0.68	0	0	13.7	0.07	0.0324	26	5.649902025	2.3	-2.7	0.9	26.00	49.8	149.2	19.6	6.913996627	15.68627451	13.03921569
1120	0	460	1	0	M	73	5	1	3.04	5.18	16.5	96.9	113	0	2.09	0.55	0.39	0	0.01	1.8	0.01				0.6				50.2	155.7	10.9	0.911854103	3.636363636	3.8
1121	0	460	0	2	M	73	7	1	4.06	4.7	15.6	99.6	110	0	3.23	0.64	0.18	0	0.01	1.6	0.01				0.5				51.8	152.8		4.697986577	3.125	5.046875
1122	0	461	1	0	M	70	4	0	3.9	5.07	15.3	92.3	236	0	2.95	0.47	0.4	0.07	0.01	2.1	0.01	0.0355	29.1	3.305484926	0.8	-1.3	0.1	12.27	47.6	155.7	14.9	3.601108033	2.127659574	6.276595745
1123	0	461	0	3	M	70	7	0	6.55	4.44	13.2	92.3	308	0	5.26	0.65	0.63	0	0.01	1.5	0.01				0.8				50	151.5	13.8	3.663003663	3.076923077	8.092307692
1124	0	462	1	1	M	71	16	0	3.45	3.86	11	90.2	230	0	2.34	0.65	0.35	0.09	0.02	3.1	0.02				1.7				52	152.4	21.5	4.013377926	9.230769231	3.6
1125	0	463	1	0	M	76	12	1	6.05	4.54	13.6	89.2	317	0	4.93	0.63	0.47	0.01	0.01	3.2	0.02	0.0313	30.9	3.324304359	1	1	0.1	26.63	50.3	150.7	15.9	2.475247525	12.6984127	7.825396825
1126	0	464	1	0	F	48	10	0	8.05	4.92	14.1	88.2	430	0	5.91	1.44	0.64	0.04	0.02	3.5	0.05	0.0369	31.3	3.646308113	1.5	2	0.1	44.29	49.2	149.6	13.2	3.003533569	8.333333333	4.104166667
1127	0	464	0	1	F	48	11	0	6.95	4.86	14.1	88.7	472	0	4.94	1.41	0.52	0.05	0.03	2.8	0.04				1.2				52.1	149	10.6	1.785714286	4.964539007	3.503546099
1128	0	464	0	3	F	48	13	0	7.74	4.89	14.1	89.2	488	0	5.85	1.14	0.67	0.06	0.02	4.4	0.05				1.2				49.2	146.6	10.5	1.180438449	3.50877193	5.131578947
1129	0	465	1	0	F	78	18	0	11.13	3.89	11.9	90.2	507	0	9.42	0.96	0.62	0.1	0.03	11.5	0.11	0.0984	32.6	3.742534837	1.6	1.8	0.7	95.82	46	147.3	9.4	0.723327306	1.041666667	9.8125
1130	0	465	0	3	F	78	21	0	7.79	4.06	11.9	98.5	421	0	5.49	1.58	0.57	0.11	0.04	4.4	0.07				0.6				51.4	149.1	12.7	0.957854406	3.164556962	3.474683544
1131	0	466	1	0	M	77	11	0	7.2	4.26	13.7	101.2	112	0	6.43	0.45	0.31	0	0.01	15.6	0.07	0.0234	32.5	7.444359171	0.3	0.2	0.1	14.11	49.5	155.9	13.3	5.576208178	4.444444444	14.28888889
1132	0	467	1	0	F	64	9	0	4.48	4.37	12.6	88.3	218	0	3.52	0.71	0.24	0	0.01	2.8	0.02	0.014	29.1	1.782304265	1.3	-1	0.3	16.57	49.7	153.7	8.5	3.365384615	5.633802817	4.957746479
1133	0	468	1	0	M	74	9	1	11.86	4.77	14.3	89.3	278	0.01	9.38	1.26	1.14	0	0.08	34.1	0.43	0.0873	27.4	5.838837517	2.1	-3	0.3	97.86	55.4	150.2	14.3	1.280788177	9.523809524	7.444444444
1134	0	468	0	1	M	74	10	1	13.74	4.58	13.2	90	296	0	10.84	1.66	1.15	0.01	0.08	21.1	0.35				2				53.5	150.7	8.4	0.7960199	4.21686747	6.530120482
1135	0	469	1	0	M	69	7	0	2.38	4.82	13	89	130	0	1.31	0.5	0.56	0	0.01	6.0	0.03	0.0337	25.7	14.42441054	4.2	-1.2	1.8	17.94	40.4	136.1		7.658643326	0	2.62
1136	0	469	0	1	M	69	8	0	1.8	3.99	11	89	111	0	0.81	0.5	0.49	0	0	6.0	0.03				4.4				43.7	136.7	12	15.83710407	0	1.62
1137	0	470	1	0	M	79	2	0	6.33	5.11	14.7	88.1	227	0	4.17	1.54	0.61	0	0.01	0.6	0.01				2				48.3	161.5	4.5	0.753295669	1.298701299	2.707792208
1138	0	471	1	0	M	78	7	0	5.09	5.23	15.2	93.9	105	0	3.52	0.9	0.66	0	0.01	3.3	0.03	0.0303	28.3	8.837209302	1	-0.8	0.5	4.73	48.1	154.3	11.1	1.567944251	3.333333333	3.911111111
1139	0	471	0	1	M	78	8	0	5.94	5.01	14.8	94.4	120	0	4.31	1.02	0.58	0.01	0.02	2.9	0.03				1				46.6	150.1		2.123552124	6.862745098	4.225490196
1140	0	471	0	4	M	78	11	0	7.03	4.92	14.4	93.9	212	0	5.49	0.91	0.58	0.03	0.02	4.4	0.04				1.1				50.3	149.8	20.9	3.393213573	14.28571429	6.032967033
1141	0	472	1	0	M	73	14	1	16.19	4.93	11.6	78.9	236	0.01	13.93	1.55	0.61	0.02	0.08	4.5	0.07				9.9				50	152.3	12.9	0.579150579	1.935483871	8.987096774
1143	0	472	0	11	M	73	24	1	13.97	4.2	9.8	79.3	257	0	13.07	0.51	0.37	0	0.02	39.2	0.2				9.6				50.4	154.5	19.6	0	3.921568627	25.62745098
1144	0	472	0	13	M	73	26	1	22.07	4.9	11.6	80	364	0.01	20.86	0.53	0.65	0	0.03	37.7	0.2				9.4				44.2	154.2	15.1	0.344234079	3.773584906	39.35849057
1145	0	473	1	0	M	84	12	1	10.53	3.83	12.7	102.9	374	0.06	8.14	1.28	1.01	0	0.1	25.0	0.32				5				48.6	145.8	9.4	0.462962963	1.5625	6.359375
1146	0	473	0	1	M	84	13	1	7.97	3.26	10.7	103.1	301	0.03	5.29	1.81	0.76	0.09	0.02	10.5	0.19				3.9				53.9	144.7	14.4	2.450229709	1.104972376	2.922651934
1147	0	473	0	3	M	84	15	1	8.08	3.32	10.7	103.6	270	0	5.77	1.74	0.46	0.08	0.03	5.7	0.1				4.1				50.9	143.6	3.4	5	0	3.316091954
1148	0	474	1	3	M	61	12	0	6.42	4.55	12.8	88.6	402	0	4.67	1.09	0.51	0.13	0.02	4.6	0.05				1.7				46.4	142.8	8.3	0.435729847	2.752293578	4.28440367
1149	0	474	0	5	M	61	14	0	6.46	4.81	13.3	85.9	441	0	4.47	1.29	0.56	0.12	0.02	10.9	0.14				2				46.7	143.6	9.3	1.818181818	2.325581395	3.465116279
1150	0	475	1	0	F	84	4	1	3.98	4.28	14.8	104.4	131	0.01	3.04	0.66	0.27	0	0.01	3.0	0.02	0.0381	32.6	14.0192926	0.7	-1.5	0.2	23.06	44.5	153.2	12.1	1.287553648	3.03030303	4.606060606
1151	0	476	1	0	F	75	7	0	3.91	2.89	8.3	91.3	187	0	2.96	0.52	0.39	0.03	0.01	5.8	0.03	0.0162	26.2	3.282937365	2.2	-3.2	1	30.67	46.6	147.3		4.843304843	3.846153846	5.692307692
1152	0	476	0	1	F	75	8	0	5.25	2.88	8.5	93.4	187	0	4.19	0.58	0.45	0.02	0.01	5.2	0.03				2				46.1	149		4.392764858	8.620689655	7.224137931
1153	0	477	1	0	M	75	21	1	7.69	4.2	11.9	86.7	211	0	6.57	0.55	0.57	0	0	5.5	0.03	0.0172	28.5	3.771471247	2.5	0.2	0.4	11.18	50.8	146.3	16.4	3.476482618	5.454545455	11.94545455
1154	0	477	0	4	M	75	25	1	9	4.41	12.6	84.8	368	0	8.27	0.46	0.26	0	0.01	13.0	0.06				3				46.8	142.6	19.6	2.192982456	10.86956522	17.97826087
1155	0	477	0	6	M	75	27	1	11.83	4.28	11.8	86.2	392	0	11.17	0.44	0.19	0.02	0.01	15.9	0.07				2.3				51.7	143.1		6.134969325	11.36363636	25.38636364
1156	0	477	0	8	M	75	29	1	11.79	4.29	11.8	86.2	373	0	11.06	0.35	0.35	0.02	0.01	25.7	0.09				2.3				50.8	147	25.7	3.571428571	8.571428571	31.6
1157	0	477	0	10	M	75	31	1	18.66	4.08	11.3	88	360	0	17.18	0.5	0.96	0.01	0.01	82.0	0.41				2				48.1	151	34	0.733496333	10	34.36
1158	0	478	1	0	M	73	14	0	4.8	4.82	15.8	94.6	157	0	3.56	0.84	0.39	0	0.01	1.2	0.01	0.026	34.2	5.030181087	0.6	0.8	0.1	12.72	47.8	160.2	3.6	0.859598854	1.19047619	4.238095238
1159	0	478	0	1	M	73	15	0	4.02	4.55	14.9	97.4	161	0	2.89	0.78	0.34	0	0.01	1.3	0.01				0.4				49.7	157.1	2.6	1.851851852	0	3.705128205
1160	0	478	0	4	M	73	18	0	5.85	4.89	15.9	98.8	237	0	3.93	1.38	0.52	0.01	0.01	2.2	0.03				0.5				49.6	152.6	5.1	1.290322581	2.173913043	2.847826087
1161	0	479	1	0	F	52	11	0	4.6	4.98	13.4	83.1	198	0	3.16	1.31	0.11	0.01	0.01	3.1	0.04	0.0314	29.6	5.788590604	3.8	2.6	0.2	15.84	52.2	153.2		17	7.633587786	2.41221374
1162	0	479	0	2	F	52	13	0	4.71	4.32	11.4	85.2	251	0	3.44	1.05	0.13	0.07	0.02	2.9	0.03				2.8				55	150.8		10.90909091	5.714285714	3.276190476
1163	0	479	0	4	F	52	15	0	5.83	4.28	11.5	84.1	407	0	4.51	1.04	0.18	0.08	0.02	11.5	0.12				3.2				56.2	149.1		16.12903226	6.730769231	4.336538462
1164	0	479	0	7	F	52	18	0	8.92	4.81	12.8	84.4	620	0	5.81	2.35	0.47	0.19	0.1	35.3	0.83				3				54	153.2	16.2	3.755868545	5.957446809	2.472340426
1165	0	480	1	0	M	76	5	0	14.43	5.19	16.1	91.1	220	0	11.94	1.8	0.67	0	0.02	5.0	0.09	0.0301	31.6	5.692675159	1	-0.1	0.3	10.12	48.4	149.8		2.876480541	6.666666667	6.633333333
1166	0	480	0	1	M	76	6	0	12.21	4.74	14.6	90.7	189	0	9.83	1.72	0.64	0	0.02	5.2	0.09				1				50.9	152.2	9.9	6.951871658	8.139534884	5.715116279
1167	0	480	0	4	M	76	9	0	6.15	4.16	12.6	92.1	212	0.01	4.22	1.12	0.7	0.09	0.02	5.4	0.06				0.9				54.6	148.2	17.9	2.764227642	15.17857143	3.767857143
1168	0	480	0	6	M	76	11	0	6.61	4.02	12.1	92.3	273	0.01	4.46	1.11	0.86	0.15	0.03	10.8	0.12				0.9				53.9	147.3	22.5	2.688172043	11.71171171	4.018018018
1169	0	481	1	0	M	55	7	0	10.47	5.05	15.6	87.5	222	0.01	8.93	1.29	0.23	0	0.02	7.8	0.1	0.0242	31.5	6.482465462	1.8	0.4	0.2	18.65	47.4	149.6		11.38613861	10.07751938	6.92248062
1170	0	482	1	0	F	66	6	0	8.39	4.73	14.9	89.2	140	0	7.11	0.97	0.3	0	0.01	7.2	0.07	0.0487	27.5	8.193163321	1.1	-3.5	0.4	7.56	49	145.2		8.59375	7.216494845	7.329896907
1171	0	483	1	2	M	58	5	1	10.59	4.06	11.9	90.6	568	0	9.42	0.53	0.48	0.14	0.02	9.4	0.05				1.2				53.6	152.8	11.3	2.375296912	3.773584906	17.77358491
1172	0	484	1	0	M	72	2	0	4.55	5.2	15.4	87.9	179	0	3.27	0.65	0.62	0	0.01	3.1	0.02	0.0208	28.8	2.677433064	1.7	-1.7	0.2	8.06	54.8	160.7	3.1	2.226345083	0	5.030769231
1173	0	484	0	1	M	72	3	0	3.78	5.01	14.5	87.6	156	0	2.86	0.47	0.4	0.03	0.02	6.4	0.03				1.8				57	159.9	10.6	2.380952381	2.127659574	6.085106383
1174	0	485	1	0	F	80	11	0	5.22	4.94	15.6	96	192	0	3.84	0.69	0.68	0	0.01	8.7	0.06	0.0405	30.8	2.36318408	0.4	-0.3	0.1	15.36	49.6	154.2	11.6	1.196581197	7.246376812	5.565217391
1175	0	485	0	2	F	80	13	0	8.25	4.68	14.6	98.1	252	0	6.25	1.34	0.6	0.05	0.01	4.5	0.06				0.3				50.7	151.6	12.7	2.156862745	7.462686567	4.664179104
1176	0	485	0	5	F	80	16	0	10.44	4.4	13.9	95.7	254	0	8.99	0.55	0.84	0.04	0.02	9.1	0.05				0.4				48.5	149.6	14.5	0.525624179	7.272727273	16.34545455
1177	0	485	0	7	F	80	18	0	11.85	4.37	13.8	96.8	302	0	9.95	0.86	0.93	0.09	0.02	10.5	0.09				0.3				48.9	152	15.1	0.611995104	4.651162791	11.56976744
1178	0	485	0	9	F	80	20	0	11.17	4.37	13.8	98.9	286	0	9.5	0.86	0.64	0.13	0.04	9.3	0.08				0.3				49.6	151.5	8.1	0.706713781	2.325581395	11.04651163
1179	0	486	1	0	F	52	6	0	4.43	4.37	13.2	87.9	173	0	2.69	1.43	0.29	0	0.02	1.4	0.02	0.0232	29.9	2.676950998	2.1	-1	0.1	6.92	51.6	156.9	7.7	4.230769231	1.398601399	1.881118881
1180	0	486	0	3	F	52	9	0	5.74	4.85	14.1	91.5	236	0	3.97	1.36	0.33	0.07	0.01	2.2	0.03				1.4				54.6	152.5		3.793103448	2.205882353	2.919117647
1181	0	487	1	0	F	84	4	1	15.06	5.08	13.8	85.4	204	0	13.39	0.79	0.79	0.02	0.07	11.4	0.09	0.0386	27.4	4.110704111	4.1	0.6	0.9	12.65	45.5	150	7.6	0.449775112	1.265822785	16.94936709
1182	0	487	0	1	F	84	5	1	13.88	4.93	13	86.8	135	0	12.78	0.44	0.59	0.01	0.06	11.4	0.05				3.8				49.9	152.8	11.4	0.959692898	2.272727273	29.04545455
1183	0	487	0	3	F	84	7	1	12.39	4	10.8	86.8	166	0	11.03	0.48	0.8	0.02	0.06	16.7	0.08				3.9				50.9	152.4	4.2	0.555555556	0	22.97916667
1184	0	487	0	5	F	84	9	1	16.38	3.64	9.9	84.1	156	0.01	15.61	0.35	0.32	0.03	0.07	82.9	0.29				5.3				51.4	152.5	8.6	1.552795031	2.857142857	44.6
1185	0	488	1	0	M	87	15	1	6.87	4.51	14.5	94.9	146	0.01	5.92	0.27	0.67	0	0.01	18.5	0.05				0.8				58.1	157.9	11.1	0.348432056	3.703703704	21.92592593
1186	0	488	0	2	M	87	17	1	4.18	3.66	11.4	97.5	105	0.01	3.61	0.2	0.32	0.04	0.01	25.0	0.05				0.6				54.1	158.5	5	10.75268817	0	18.05
1187	0	488	0	4	M	87	19	1	3.04	3.68	12	95.1	109	0.01	2.54	0.2	0.26	0.03	0.01	25.0	0.05				0.9				50.5	153	5	2.222222222	0	12.7
1188	0	488	0	7	M	87	22	1	5.17	4.03	12.5	94.8	153	0.01	4.56	0.27	0.31	0.02	0.01	18.5	0.05				0.8				55.5	159.1	7.4	12.5	0	16.88888889
1189	0	489	1	0	M	63	12	0	10.99	5.28	15.4	88.1	286	0	9.17	1.03	0.75	0.02	0.02	2.9	0.03	0.029	29.3	5.358182877	1.5	0	0.1	11.44	44	152.9	8.7	1.046337818	3.883495146	8.902912621
1190	0	489	0	4	M	63	16	0	8.29	4.67	13.6	88.7	409	0	5.87	1.52	0.62	0.23	0.05	9.2	0.14				1.5				43.1	149.1	10.5	0.725952813	5.263157895	3.861842105
1191	0	490	1	4	F	56	12	0	8.09	3.84	11.5	92.4	336	0	6.05	1.22	0.76	0.04	0.02	3.3	0.04				0.8				48.7	148	9.8	1.179941003	4.098360656	4.959016393
1192	0	490	0	7	F	56	15	0	6.67	4.29	12.9	92.3	544	0	3.78	2.18	0.62	0.05	0.04	5.0	0.11				1				48.1	148	11	0.904159132	3.211009174	1.733944954
1193	0	491	1	1	M	68	9	1	7.26	4.93	14.1	87.2	258	0	6.28	0.56	0.39	0.03	0	8.9	0.05				1.8				53.2	151.9	17.9	2.005730659	12.5	11.21428571
1194	0	491	0	2	M	68	10	1	7.42	5.19	14.4	87.9	262	0	6.35	0.63	0.32	0.11	0.01	6.3	0.04				1.6				55.8	152	6.3	3.703703704	4.761904762	10.07936508
1195	0	491	0	3	M	68	11	1	8.31	4.79	13.7	87.5	302	0	7.22	0.58	0.35	0.15	0.01	5.2	0.03				1.9				54.3	149.7	13.8	2.605863192	6.896551724	12.44827586
1196	0	491	0	6	M	68	14	1	6.09	5.21	14.6	87.7	428	0	4.93	0.66	0.35	0.14	0.01	6.1	0.04				1.6				53.1	153	12.1	1.628664495	6.060606061	7.46969697
1197	0	491	0	8	M	68	16	1	6.9	5.3	14.5	89.2	457	0	5.52	0.79	0.48	0.09	0.02	5.1	0.04				1.3				52.8	156.9	11.4	0.240963855	2.53164557	6.987341772
1198	0	491	0	10	M	68	18	1	6.16	4.81	13.5	88.8	428	0	4.71	0.86	0.49	0.08	0.02	3.5	0.03				1.3				53.5	158.2	10.5	1.851851852	3.488372093	5.476744186
1199	0	492	1	0	M	59	10	0	10.58	4.08	11.5	83.8	168	0	8.8	0.76	1	0	0.02	14.5	0.11	0.0286	26.8	2.468152866	2.5	-2.5	0.1	11.42	51.6	158.5		1.016949153	3.947368421	11.57894737
1200	0	492	0	1	M	59	11	0	12.61	4.9	13.6	83.7	235	0	9.78	1.37	1.42	0	0.04	4.4	0.06				2.7				51.3	157	5.1	0.629425649	2.919708029	7.138686131
1201	0	493	1	0	M	42	10	0	7.68	5	15.7	87.4	180	0	6.21	0.74	0.52	0.18	0.03	2.7	0.02	0.019	31.9	4.085843995	1.1	0.3	0.1	12.42	48.4	153.7		1.766004415	4.054054054	8.391891892
1202	0	493	0	1	M	42	11	0	4.44	4.48	13.5	90	222	0	2.46	1.43	0.48	0.05	0.02	0.7	0.01				0.9				53.5	152.5		4.326923077	3.496503497	1.72027972
1203	0	494	1	0	M	65	7	0	4.69	5.2	16	91.2	310	0	2.89	1.06	0.63	0.1	0.01	3.8	0.04	0.0302	31.5	2.991919633	0.8	0.5	0.1	20.77	47.1	151.2		5.313092979	5.660377358	2.726415094
1204	0	494	0	2	M	65	9	0	5.77	4.87	15	90.8	396	0	3.69	1.08	0.81	0.16	0.03	6.5	0.07				1				46.9	148.5	14.8	2.256699577	6.481481481	3.416666667
1205	0	494	0	3	M	65	10	0	5.97	4.75	14.6	91.2	410	0	4.11	0.99	0.75	0.11	0.01	5.1	0.05				0.7				47.1	148.1	20.2	2.773497689	9.090909091	4.151515152
1206	0	495	1	0	M	67	10	1	15.72	5.57	16.1	85.6	201	0	14.76	0.57	0.37	0	0.02	38.6	0.22	0.0368	26.5	9.112058938	2.4	-2.2	0.7	12.86	46.8	145.4	17.5	3.448275862	15.78947368	25.89473684
1207	0	495	0	2	M	67	12	1	9.27	5.24	15.1	86.8	252	0	8.54	0.49	0.22	0.01	0.01	34.7	0.17				1.8				50	150	12.2	2.07253886	6.12244898	17.42857143
1208	0	495	0	4	M	67	14	1	12.24	5.21	14.7	86.2	335	0	11.52	0.42	0.24	0.04	0.02	54.8	0.23				1.8				50.8	149.1	16.7	0.943396226	7.142857143	27.42857143
1209	0	495	0	6	M	67	16	1	12.76	5.01	14.3	87.6	375	0	11.9	0.5	0.29	0.06	0.01	42.0	0.21				1.5				46.9	149.4	22	1.171875	8	23.8
1210	0	495	0	6	M	67	16	1	13.56	4.91	14	87.4	395	0	12.47	0.62	0.36	0.09	0.02	41.9	0.26				1.6				46.7	149	21	0.955414013	4.838709677	20.11290323
1211	0	495	0	7	M	67	17	1	12.88	4.8	13.8	88.3	414	0	11.7	0.65	0.4	0.11	0.02	27.7	0.18				1.3				48.1	150.7	20	0.854700855	4.615384615	18
1212	0	496	1	0	M	86	5	1	11.21	5.5	17.5	95.3	196	0.01	9.53	1.21	0.45	0	0.02	7.4	0.09	0.0336	29.5	4.943273906	1.2	-3	0.1	23.13	47.1	152.3	5.8	1.990049751	3.305785124	7.876033058
1213	0	496	0	1	M	86	6	1	12.23	5.21	16.3	95.4	190	0	10.42	1.49	0.3	0.01	0.01	5.4	0.08				1.3				48.4	151.1		5.166051661	2.684563758	6.993288591
1214	0	497	1	9	M	49	17	1	8.71	4.12	12.7	97.3	591	0	6.84	1.06	0.71	0.08	0.02	5.7	0.06				0.5				50.7	150.5	13.2	1.008403361	4.716981132	6.452830189
1215	0	497	0	12	M	49	20	1	9.2	4.06	13	96.6	645	0	6.86	1.14	0.98	0.16	0.06	11.4	0.13				0.6				46.1	153	7	0.240963855	2.631578947	6.01754386
1216	0	498	1	0	F	22	7	0	5.18	4.64	14.5	93.8	331	0.01	3.79	0.89	0.44	0.02	0.04	12.4	0.11	0.0306	30.1	7.297234488	0.6	-1.3	0.4	53.62	50.2	145.8	16.9	4.336734694	12.35955056	4.258426966
1217	0	498	0	1	F	22	8	0	4.41	4.56	13.7	94.1	341	0.01	2.91	0.98	0.45	0.04	0.03	12.2	0.12				0.6				52	145.8	17.3	3.456790123	13.26530612	2.969387755
1218	0	498	0	3	F	22	10	0	8.54	4.39	13	93.8	415	0	6.85	1.01	0.55	0.11	0.02	26.7	0.27				0.5				53.8	145.5	7.9	1.091703057	2.97029703	6.782178218
1219	0	498	0	5	F	22	12	0	7.24	4.42	13.5	94.1	479	0	5.45	0.98	0.63	0.13	0.05	20.4	0.2				0.5				50.9	144.6	6.1	0.517241379	2.040816327	5.56122449
1220	0	499	1	0	F	87	21	0	6.3	4.48	13.7	93.3	237	0	4.95	0.85	0.49	0	0.01	4.7	0.04	0.0278	30.1	4.291990537	0.7	0	0.2	15.17	49.7	156.2	9.4	7.748184019	3.529411765	5.823529412
1221	0	500	1	0	M	84	14	1	5.47	4.4	13.9	95.5	104	0	4.2	0.79	0.43	0.04	0.01	2.5	0.02	0.0321	27.7	7.557251908	1.5	-4.1	0.4	12.17	43.4	155.3	7.6	3.937007874	3.797468354	5.316455696
1222	0	500	0	1	M	84	15	1	5.2	4.56	13.9	97.1	114	0	3.77	0.93	0.36	0.13	0.01	2.2	0.02				1.3				48	156.3		7.076923077	2.150537634	4.053763441
1223	0	500	0	2	M	84	16	1	7.06	4.39	13.6	97.3	121	0	5.54	0.69	0.69	0.13	0.01	4.3	0.03				1.1				48.1	153.9	10.1	5.372616984	4.347826087	8.028985507
1224	0	500	0	4	M	84	18	1	8.72	4.51	13.7	95.8	171	0	7.06	0.57	0.97	0.11	0.01	7.0	0.04				1.3				47	150.2		1.884570082	5.263157895	12.38596491
1225	0	500	0	7	M	84	21	1	13.88	4.57	13.7	97.2	204	0	11.84	0.87	1.03	0.12	0.02	25.3	0.22				1.2				48.3	151.4	11.5	1.696832579	3.448275862	13.6091954
1226	0	500	0	9	M	84	23	1	16.29	4.78	14.9	96.7	236	0.01	13.96	0.84	1.18	0.24	0.07	31.0	0.26				1.1				48.2	153.3	9.5	0.383141762	1.19047619	16.61904762
1227	0	501	1	0	M	85	9	0	4.64	5.24	14.7	86.3	162	0	3.18	1.19	0.26	0	0.01	0.8	0.01	0.022	29.4	2.447381302	3.5	0.9	0.4	18.31	51.9	153.3	5.9	2.202643172	0.840336134	2.672268908
1228	0	501	0	4	M	85	13	0	4.75	5.33	14.4	86.1	236	0	3.27	1.17	0.22	0.09	0	0.9	0.01				3.4				49.1	150	6	1.960784314	2.564102564	2.794871795
1229	0	501	0	6	M	85	15	0	5.29	5.54	15.3	86.5	309	0	3.74	1.19	0.24	0.11	0.01	0.8	0.01				3.5				47.5	147.5	8.4	0.469483568	1.680672269	3.142857143
1230	0	501	0	8	M	85	17	0	5.84	5.19	14.4	86.1	345	0.01	4.2	1.11	0.38	0.15	0	3.6	0.04				3.6				47.6	151.8	7.2	0.3003003	0.900900901	3.783783784
1231	0	501	0	11	M	85	20	0	5.73	5.07	13.9	88.2	409	0	3.45	1.6	0.49	0.18	0.01	1.3	0.02				2.9				51.1	154.8	6.9	0.468384075	1.25	2.15625
1232	0	502	1	0	F	57	11	0	4.82	4.28	13.3	93.2	226	0	3.16	1.27	0.38	0	0.01	1.6	0.02	0.0227	29.4	4.781319496	0.6	-1.8	0.4	18.98	46.6	152.2	5.5	1.428571429	2.362204724	2.488188976
1233	0	503	1	0	M	76	4	1	4.82	3.95	12.5	97.7	240	0	3.82	0.46	0.52	0.01	0.01	4.3	0.02				0.7				54.7	164.4	4.3	1.754385965	0	8.304347826
1234	0	503	0	1	M	76	5	1	3.53	3.46	11.2	96	220	0	2.64	0.48	0.4	0.01	0	2.1	0.01				0.8				55.7	161.7	8.3	0.578034682	2.083333333	5.5
1235	0	504	1	0	M	76	5	0	10.62	4.81	14.7	90.9	219	0.01	9.53	0.46	0.61	0	0.02	26.1	0.12				2.2				52.4	150.3	15.2	4.69043152	8.695652174	20.7173913
1236	0	504	0	13	M	76	18	0	21.28	4.63	13.6	89.8	523	0	18.42	1.16	1.61	0.05	0.04	15.5	0.18				2.1				46	152.2	6.9	0.346740638	1.724137931	15.87931034
1237	0	504	0	15	M	76	20	0	10.26	4.25	12.7	93.4	491	0	8.2	0.77	1.04	0.23	0.02	6.5	0.05				1.3				45.2	148.9	5.2	0.210970464	1.298701299	10.64935065
1238	0	504	0	18	M	76	23	0	10.59	3.99	11.9	94.5	482	0	8.53	0.68	0.9	0.43	0.05	10.3	0.07				1.1				46.3	150.8	5.9	0.251572327	1.470588235	12.54411765
1239	0	505	1	0	M	43	18	0	4.69	4.68	14.4	85.3	234	0	3.65	0.79	0.25	0	0	2.5	0.02	0.0159	32.7	2.469542311	1.6	1.4	0.3	9.13	48.7	151.6		4.444444444	6.329113924	4.620253165
1240	0	506	1	0	M	60	10	1	4.63	4.74	12.7	80.4	144	0	3.48	0.84	0.3	0	0.01	4.8	0.04	0.0284	25.2	6.845407872	6.4	-2.4	0.8	16.27	46.4	145.4	7.1	8.301886792	2.380952381	4.142857143
1241	0	506	0	2	M	60	12	1	4.9	4.83	12.9	83.4	183	0	4.07	0.67	0.16	0	0	6.0	0.04				4.9				50.9	145.4		19.8630137	2.985074627	6.074626866
1242	0	507	1	0	M	63	7	0	7.44	3.4	10.7	100	329	0	4.76	1.96	0.68	0.02	0.02	4.1	0.08				0.4				46.2	155.5	3.6	1.49750416	1.020408163	2.428571429
1243	0	507	0	7	M	63	14	0	12.81	3.46	10.9	96.2	488	0.02	10.04	1.29	1.23	0.2	0.05	19.4	0.25				0.7				47	151.4	6.2	0.363636364	3.100775194	7.782945736
1244	0	508	1	0	M	73	20	0	5.97	4.7	13.5	87.2	234	0	4.98	0.52	0.46	0	0.01	11.5	0.06	0.0183	28.7	5.794587092	2.3	-0.8	0.6	25.04	46.6	149.8	11.5	2.53164557	7.692307692	9.576923077
1245	0	509	1	0	F	56	2	0	4.32	4.57	14	85.3	228	0	2.74	1.2	0.36	0	0.02	0.8	0.01	0.0343	26.6	4.397862721	3.7	-2.5	0.4	13.45	48.6	154.2	3.3	2.243589744	0.833333333	2.283333333
1246	0	510	1	0	M	87	8	0	9.84	5.04	15.4	89.3	317	0	9.07	0.44	0.33	0	0	13.6	0.06	0.0459	32.1	7.904411765	1.5	2	0.1	21.87	48.3	151.2	15.9	2.105263158	6.818181818	20.61363636
1247	0	510	0	2	M	87	10	0	10.54	5.41	16.2	92.8	360	0	9.79	0.52	0.22	0	0.01	11.5	0.06				1.1				50.1	149.4	11.5	2.538071066	5.769230769	18.82692308
1248	0	510	0	4	M	87	12	0	8.31	5.08	15.4	91.1	315	0	6.7	1.15	0.42	0.02	0.02	4.3	0.05				1.3				49	148.9	13.9	1.6	5.217391304	5.826086957
1249	0	510	0	7	M	87	15	0	10.86	5.12	15.2	94.7	391	0	8.95	1.37	0.5	0.03	0.01	5.8	0.08				0.8				48	150.2	8	0.660792952	2.189781022	6.532846715
1250	0	511	1	0	M	77	7	1	7.97	4.75	13.8	85.3	146	0	6.67	0.86	0.43	0	0.01	7.0	0.06	0.0285	28.8	4.89098409	3.1	-0.4	0.4	12.26	49.8	153.7	18.6	7.161803714	10.46511628	7.755813953
1251	0	511	0	1	M	77	8	1	9.2	4.44	12.9	85.8	143	0.01	8.35	0.59	0.24	0.01	0.01	15.3	0.09				2.9				51.7	152.1		10.83743842	6.779661017	14.15254237
1252	0	512	1	0	F	77	7	0	16.17	4	12.6	96.3	286	0	14.94	0.93	0.29	0	0.01	44.1	0.41	0.0392	28.6	2.756464905	0.5	-2.2	0.4	32.89	52.1	158.9		18.14516129	6.451612903	16.06451613
1253	0	512	0	1	F	77	8	0	10.86	3.59	11.3	95.5	288	0	9.73	0.73	0.37	0.01	0.02	17.8	0.13				0.5				53.6	156.1	15.1	11.00917431	8.219178082	13.32876712
1254	0	512	0	3	F	77	10	0	8.47	3.5	10.8	96	381	0	6.78	0.99	0.64	0.04	0.02	16.2	0.16				0.6				55.4	154	33.3	5.300353357	22.22222222	6.848484848
1255	0	512	0	5	F	77	12	0	9.19	3.58	11.1	95.3	574	0	7.24	0.97	0.84	0.11	0.03	38.1	0.37				0.5				52	153	20.6	2.496532594	10.30927835	7.463917526
1256	0	512	0	8	F	77	15	0	12.72	3.92	12.2	96.7	760	0	10.21	1.36	0.85	0.24	0.06	23.5	0.32				0.6				54.3	163	15.4	1.351351351	4.411764706	7.507352941
1257	0	512	0	12	F	77	19	0	10.44	4.11	12.6	97.3	607	0	7.76	1.57	0.89	0.15	0.07	4.5	0.07				0.5				54	163.5	18.5	1.321003963	7.643312102	4.942675159
1258	0	513	1	0	M	82	4	1	5.83	3.52	11	91.8	208	0	4.91	0.47	0.44	0	0.01	6.4	0.03				1				49.5	162	6.4	0.779220779	2.127659574	10.44680851
1259	0	513	0	1	M	82	5	1	6.31	3.46	10.6	91.3	200	0.01	4.24	1.34	0.71	0	0.02	20.9	0.28				1.1				53.5	161.5		3.915662651	0.746268657	3.164179104
1260	0	513	0	3	M	82	7	1	4.99	3.27	10.3	91.7	178	0	4.37	0.37	0.24	0	0.01	10.8	0.04				1.2				53.4	162.2	8.1	10.45454545	5.405405405	11.81081081
1261	0	514	1	0	F	79	5	1	7.82	3.79	11.6	92.9	247	0.01	7.11	0.46	0.23	0.01	0.01	13.0	0.06				1.7				44.4	150.6	17.4	6.341463415	6.52173913	15.45652174
1262	0	514	0	1	F	79	6	1	7.92	3.57	10.4	91.9	272	0.02	6.67	0.89	0.36	0	0	16.9	0.15				2.1				50.7	152.3		25.64935065	10.11235955	7.494382022
1263	0	514	0	3	F	79	8	1	5.39	4	11.9	104.5	196	0.02	4.58	0.51	0.27	0.01	0.02	7.8	0.04	0.0816	23.9	2.5	1.3	-4.6	1.4	4.90	52.7	145.2		7.894736842	21.56862745	8.980392157
1264	0	514	0	7	F	79	13	1	7.32	3.78	10.9	89.7	350	0.02	5.96	0.81	0.4	0.12	0.03	12.3	0.1				3.3				49.8	141.7		14.92957746	40.74074074	7.358024691
1265	0	514	0	10	F	79	16	1	8.21	3.39	9.9	91.7	514	0.01	6.56	0.9	0.41	0.32	0.02	13.3	0.12				2.9				47.1	141.5	40	4.748603352	17.77777778	7.288888889
1266	0	514	0	11	F	79	17	1	7.59	3.54	10.3	94.6	526	0.01	5.7	1.19	0.42	0.25	0.03	7.6	0.09				2.4				48.3	145	30.3	3.664921466	9.243697479	4.789915966
1267	0	514	0	14	F	79	20	1	8.88	3.57	10.3	97.2	514	0	6.53	1.57	0.52	0.23	0.03	6.4	0.1				1.9				49.2	149	19.1	4.405286344	10.1910828	4.159235669
1268	0	514	0	16	F	79	22	1	13.89	3.76	10.7	98.9	600	0.03	11.7	1.58	0.53	0.03	0.05	16.5	0.26				1.6				47.1	151	16.5	4.068522484	7.594936709	7.405063291
1269	0	515	1	1	M	70	10	0	12.47	4.6	13.7	90.9	355	0	10.86	1.29	0.29	0.01	0.02	7.0	0.09				1.4				56.3	152.3		3.90625	0.775193798	8.418604651
1270	0	515	0	4	M	70	13	0	7.87	4.64	13.5	89.9	526	0	5.48	1.54	0.76	0.06	0.03	9.1	0.14				1.4				56.5	151.4	14.3	1.225114855	3.896103896	3.558441558
1271	0	516	1	0	F	79	4	0	7.16	4.59	13.8	90	170	0	5.14	1.31	0.68	0.02	0.01	2.3	0.03	0.0509	23.7	16.86586985	3.1	-5.9	1.1	7.14	46.4	147.2	8.4	2.595155709	4.580152672	3.923664122
1272	0	516	0	1	F	79	5	0	7.44	4.05	12.2	91.1	127	0.01	5.44	1.07	0.82	0.1	0.01	3.7	0.04				2.4				48.9	146		6.548431105	5.607476636	5.08411215
1273	0	516	0	2	F	79	6	0	7.09	4.46	13.4	91.3	175	0	4.63	1.49	0.76	0.2	0.01	1.3	0.02				2.3				47.6	145.7	10.7	2.43902439	4.697986577	3.10738255
1274	0	516	0	4	F	79	8	0	6.61	4.26	12.8	89.9	235	0	4.17	1.49	0.75	0.18	0.02	2.7	0.04				2.7				45	145.2	11.4	0.895522388	6.711409396	2.798657718
1275	0	516	0	7	F	79	11	0	7.7	4.27	12.6	92.7	353	0	4.7	1.66	0.95	0.36	0.03	3.0	0.05				2				46.6	144.5	9.6	0.974421437	1.807228916	2.831325301
1276	0	517	1	0	F	58	7	0	4.48	3.68	11.6	99.5	150	0	3.22	0.97	0.28	0.01	0	1.0	0.01	0.0372	26.6	3.364670955	0.4	-4.3	0.1	9.60	47.5	151.9	10.3	4.508196721	2.06185567	3.319587629
1277	0	517	0	1	F	58	8	0	4.31	3.48	11.1	100.3	159	0	2.8	1.16	0.31	0.03	0.01	1.7	0.02				0.4				45	148.3	9.5	3.180212014	1.724137931	2.413793103
1278	0	517	0	3	F	58	10	0	3.79	3.3	10.5	101.2	204	0	3.01	0.68	0.09	0.01	0	2.9	0.02				0.4				47.6	147.7		12.04819277	2.941176471	4.426470588
1279	0	517	0	5	F	58	12	0	3.94	3.2	10.2	102.8	253	0	2.83	0.87	0.14	0.09	0.01	3.4	0.03				0.5				49.3	144.5	14.9	7.2	4.597701149	3.252873563
1280	0	517	0	9	F	58	16	0	5.14	2.99	9.4	100.7	360	0.01	3.35	1.29	0.3	0.19	0.01	7.0	0.09				0.6				46.5	147.8	15.5	2.671755725	3.875968992	2.596899225
1281	0	517	0	10	F	58	17	0	6.04	3.27	9.9	102.4	444	0.01								0.0654	26.9	2.535408288	0.6	-2.9	1.8	135.42
1282	0	518	1	0	M	86	14	1	8.03	4.25	12.9	93.6	247	0	6.86	0.86	0.3	0	0.01	9.3	0.08	0.017	31.6	4.975767367	1.3	1.7	0.4	25.19	55.6	152		15.72580645	9.302325581	7.976744186
1283	0	519	1	0	M	57	13	0	7.33	4.95	14.6	89.3	239	0	5.03	1.37	0.86	0.04	0.03	5.1	0.07	0.0381	25	8.267342414	2.2	-4.8	0.9	23.90	41.9	142.8	4.4	1.017811705	2.919708029	3.671532847
1284	0	519	0	4	M	57	17	0	11.39	5.12	15	88.3	428	0	9.25	0.78	1.06	0.22	0.08	29.5	0.23				2				47.3	146.3	11.5	0.419727177	5.128205128	11.85897436
1285	0	519	0	6	M	57	19	0	10.62	5.07	14.3	89.7	404	0	8.24	1.16	0.97	0.19	0.06	24.1	0.28				1.5				50.1	148.8	13.8	0.937866354	4.310344828	7.103448276
1286	0	519	0	8	M	57	21	0	9.6	4.95	14.3	90.1	439	0	5.87	2.36	1.09	0.19	0.09	5.9	0.14				1.6				48.1	151.7	3.4	0.868621064	0.847457627	2.487288136
1287	0	520	1	0	F	82	8	0	6.46	4.29	13.2	93.2	192	0	5.07	1.03	0.34	0	0.02	1.9	0.02	0.027	28	6.428284452	0.6	-3.2	0.2	16.13	45.9	158.1	9.7	3.300330033	5.825242718	4.922330097
1288	0	520	0	3	F	82	11	0	5.18	4.11	12.1	94.2	271	0	4.14	0.64	0.37	0.02	0.01	1.6	0.01				0.6				52.6	152.4	20.3	2.431610942	10.9375	6.46875
1289	0	520	0	5	F	82	13	0	6.91	4.02	12.4	94.5	343	0	5.38	0.89	0.54	0.07	0.03	3.4	0.03				0.5				49.1	151.5	14.6	1.464435146	5.617977528	6.04494382
1290	0	520	0	8	F	82	16	0	7.21	4.23	12.8	94.1	434	0	5.31	1.31	0.45	0.1	0.04	3.8	0.05				0.6				46.7	151.3	10.7	1.237623762	3.816793893	4.053435115
1291	0	521	1	0	F	66	2	0	7.3	3.88	11.6	91.5	153	0	6.48	0.26	0.43	0.1	0.03	19.2	0.05	0.0896	32.9	7.053291536	1.3	2.2	0.05	18.36	54	162.2	7.7	7.407407407	0	24.92307692
1292	0	522	1	0	F	82	3	0	10.06	4.31	13.2	94.7	303	0	8.51	0.78	0.74	0	0.03	3.8	0.03	0.0448	31.2	4.160401003	0.9	-0.1	0.1	13.33	45.6	161.3	3.8	0.624024961	1.282051282	10.91025641
1293	0	522	0	3	F	82	6	0	4.96	3.81	11.7	96.9	212	0	3.82	0.7	0.42	0	0.02	2.9	0.02				0.9				48.3	156.4	10	1.591511936	4.285714286	5.457142857
1294	0	523	1	0	F	52	7	0	4.83	4.23	12.7	92.9	211	0	3.18	1.19	0.4	0.05	0.01	0.8	0.01	0.0309	29.6	4.54195535	0.5	0	0.2	16.04	51.2	151.8	11.8	1.445086705	3.361344538	2.672268908
1295	0	523	0	1	F	52	8	0	6.37	3.94	11.6	93.4	193	0	4.84	1.02	0.41	0.08	0.02	2.0	0.02				0.5				52.2	149.6	14.7	0.581395349	3.921568627	4.745098039
1296	0	524	1	0	F	85	5	1	5.43	4.35	12.2	85.3	150	0	4.62	0.54	0.26	0	0.01	3.7	0.02				2.2				49	153.5	9.3	12.3853211	3.703703704	8.555555556
1297	0	525	1	0	M	69	11	1	13.52	4.91	15.8	90.8	171	0	12.12	0.66	0.73	0	0.01	22.7	0.15	0.027	29.7	10.48422923	1.2	-2.8	0.1	11.80	47	157	16.7	2.681388013	12.12121212	18.36363636
1298	0	525	0	1	M	69	12	1	12.06	4.8	15.2	93.1	206	0	10.67	0.7	0.68	0	0.01	20.0	0.14				0.9				47.4	155.9	14.3	1.650165017	12.85714286	15.24285714
1299	0	525	0	3	M	69	14	1	8.4	4.47	14	96	333	0	7.05	0.62	0.7	0.01	0.02	21.0	0.13				0.8				47.9	152.5	11.3	1.132686084	8.064516129	11.37096774
1300	0	526	1	0	M	88	14	0	4.98	5.45	16	87.5	130	0.01	3.99	0.73	0.25	0	0.01	2.7	0.02	0.0218	31.8	6.133493686	3.3	1.5	0.2	5.20	49.6	147.8	6.8	3.686635945	4.109589041	5.465753425
1301	0	526	0	1	M	88	15	0	7.14	5	14.6	88	128	0	5.8	1.07	0.26	0.01	0	2.8	0.03				3				51.8	147.2	2.8	5.555555556	1.869158879	5.420560748
1302	0	527	1	0	M	87	12	0	4.88	5.19	13.9	83	153	0.01	2.9	1.63	0.34	0	0.01	1.2	0.02	0.0228	28.4	4.43592552	5	1.1	0.3	6.12	45.5	157.4		2.950819672	3.680981595	1.779141104
1303	0	527	0	3	M	87	15	0	4	4.62	12.2	82	191	0.01	3.09	0.8	0.09	0.01	0.01	2.5	0.02				6.2				46.3	155.5		29.33333333	8.75	3.8625
1304	0	527	0	4	M	87	16	0	5.07	4.49	12.1	82.9	227	0	3.66	1.27	0.12	0.01	0.01	3.1	0.04				5.9				48.1	152.5		26.1682243	11.02362205	2.881889764
1305	0	527	0	6	M	87	18	0	5.97	4.43	12	80.8	314	0	4.47	1.2	0.23	0.05	0.02	4.2	0.05				7.1				44	148.9	18.3	4.87804878	9.166666667	3.725
1306	0	527	0	8	M	87	20	0	5.39	4.33	11.9	82	409	0.01	3.8	1.24	0.21	0.11	0.03	6.5	0.08				6.6				43.4	145.2		3.157894737	5.64516129	3.064516129
1307	0	527	0	11	M	87	23	0	6.31	4.36	12	84.4	581	0	4.47	1.44	0.27	0.1	0.03	2.8	0.04				5.4				44.3	152.1	8.3	0.823045267	1.388888889	3.104166667
1308	0	528	1	0	M	83	10	1	8.64	3.31	11.9	103	202	0	7.25	0.86	0.49	0.02	0.02	5.8	0.05	0.0182	35.2	7.30783794	0.5	-0.4	0.3	20.00	54.3	159.3	30.2	4.666666667	18.60465116	8.430232558
1309	0	528	0	2	M	83	12	1	16.76	2.93	10.5	105.5	154	0	14.59	1.44	0.7	0	0.03	10.4	0.15				0.3				53.8	158.5	50.7	8.333333333	42.36111111	10.13194444
1310	0	529	1	0	M	89	7	0	6.97	4.37	14.1	96.8	79	0	6.01	0.5	0.43	0.02	0.01	6.0	0.03				0.7				46.5	149.9	12	9.701492537	4	12.02
1311	0	529	0	3	M	89	10	0	6.5	4	12.4	94	109	0	5.53	0.52	0.44	0	0.01	7.7	0.04				1				50.1	149.6	9.6	8.533333333	5.769230769	10.63461538
1312	0	529	0	6	M	89	13	0	5.98	4.06	13	92.9	244	0	4.69	0.67	0.6	0.01	0.01	9.0	0.06				0.8				50.1	149.4	11.9	1.291512915	5.970149254	7
1313	0	529	0	8	M	89	15	0	6.06	4.08	13.1	95.8	349	0	4.12	1.03	0.79	0.07	0.05	12.6	0.13				0.8				46.9	148.3	9.7	0.724637681	5.825242718	4
1314	0	529	0	13	M	89	20	0	6.55	4.12	13.2	99	398	0	3.88	1.44	1	0.16	0.07	2.8	0.04				0.6				44.8	153.8	5.6	0.572737686	0.694444444	2.694444444
1315	0	530	1	0	M	72	12	1	10.25	4.42	14.1	94.8	265	0	8.67	1.22	0.31	0.02	0.03	8.2	0.1	0.0265	34	2.539931919	0.9	1.3	0.1	34.98	50.7	153.5		10.52631579	8.196721311	7.106557377
1316	0	530	0	2	M	72	14	1	7.88	3.61	11.2	95.6	228	0	6.69	0.87	0.27	0.05	0	6.9	0.06				0.8				55	153.8		11.20689655	9.195402299	7.689655172
1317	0	530	0	8	M	72	20	1	19.76	3.49	10.8	99.7	261	0.01	17.15	1.58	0.97	0.01	0.05	50.0	0.79				0.7				54.3	157.5	19.6	5.484247375	8.227848101	10.85443038
1318	0	531	1	0	M	61	7	0	3.88	4.96	15.2	91.5	215	0	2.58	0.79	0.49	0.01	0.01	3.8	0.03	0.0268	31.2	3.855325914	0.7	0.7	0.2	11.61	49.8	156.8	7.6	1.222493888	3.797468354	3.265822785
1319	0	532	1	0	M	35	11	0	13.16	5.03	16	92.4	319	0	10.92	1.47	0.73	0.02	0.02	6.1	0.09	0.0352	31.6	4.768008203	0.8	0.3	0.1	26.80	53.9	153.4	12.2	4.423380727	7.482993197	7.428571429
1320	0	533	1	0	F	75	14	0	4.52	4.04	12.8	91.8	184	0	3.03	1.1	0.38	0	0.01	1.8	0.02	0.023	29.5	4.514308746	1.7	-2.4	0.3	13.80	45.9	150.9	9.1	3.058103976	5.454545455	2.754545455
1321	0	533	0	1	F	75	15	0	3.58	3.77	11.7	93.4	168	0.01	2.46	0.88	0.23	0	0.01	4.5	0.04				1.6				48.9	150.1		6.310679612	3.409090909	2.795454545
1322	0	533	0	4	F	75	18	0	6.67	4.04	12.5	95	311	0	4.99	1.17	0.48	0.02	0.01	6.0	0.07				1.2				50.5	147	12.8	4.600484262	9.401709402	4.264957265
1323	0	533	0	6	F	75	20	0	7.09	3.8	11.8	94.5	375	0	5.39	0.99	0.66	0.03	0.02	11.1	0.11				1.3				48.8	145.8	7.1	1.546391753	3.03030303	5.444444444
1324	0	534	1	0	M	89	5	1	3.99	4.66	14.8	92.9	113	0	3.3	0.5	0.17	0.01	0.01	4.0	0.02				1.1				44.2	151.4	6	0	0	6.6
1325	0	534	0	2	M	89	7	1	3.19	4.7	14.7	92.6	95	0	2.56	0.46	0.16	0	0.01	4.3	0.02				1.1				50.7	153.1	19.6	2.112676056	2.173913043	5.565217391
1326	0	534	0	4	M	89	9	1	2.56	4.83	14.9	93.6	96	0	1.98	0.43	0.15	0	0	4.7	0.02				1.1				50.3	155		9.489051095	0	4.604651163
1327	0	534	0	5	M	89	10	1	2.73	4.43	13.5	92.8	99	0	2.25	0.37	0.11	0	0	2.7	0.01				1.2				53.7	156.7		19.35483871	0	6.081081081
1328	0	534	0	7	M	89	12	1	4.12	4.69	14.4	92.8	150	0	3.58	0.43	0.1	0	0.01	7.0	0.03				1.2				49.4	148.5		10.98901099	4.651162791	8.325581395
1329	0	535	1	0	M	69	10	1	9.38	4.54	15	97.4	226	0	7.8	0.91	0.64	0	0.03	16.5	0.15	0.0177	32.4	4.214430209	0.9	-0.4	0.6	21.24	53.5	155.6	24.2	1.745200698	13.18681319	8.571428571
1330	0	536	1	0	M	67	4	0	8.41	4.72	14.1	87.9	277	0	7.08	0.66	0.61	0.04	0.02	6.1	0.04	0.0307	32	4.690164866	1.7	2	0.2	14.13	47.7	155.9	28.8	4.27184466	10.60606061	10.72727273
1331	0	536	0	2	M	67	6	0	8.19	4.26	12.9	87.8	339	0	6.56	0.65	0.85	0.09	0.04	7.7	0.05				1.7				46.3	150.8	20	1.216216216	9.230769231	10.09230769
1332	0	537	1	0	M	77	4	0	7.82	4.24	14	92	194	0	6.87	0.55	0.39	0	0.01	5.5	0.03	0.0187	29.5	4.33244916	1	-2.5	0.1	19.01	49.1	153.2	10.9	2.298850575	7.272727273	12.49090909
1333	0	537	0	2	M	77	6	0	7.28	4.17	12.6	92.8	208	0	5.85	0.85	0.56	0.01	0.01	2.4	0.02				0.7				53.5	152.6		6.751054852	11.76470588	6.882352941
1334	0	537	0	4	M	77	8	0	7.34	3.97	12	95	260	0	5.64	1.03	0.56	0.09	0.02	3.9	0.04				0.6				53.6	148.7	25.2	2.249488753	9.708737864	5.475728155
1335	0	537	0	7	M	77	11	0	8.8	4.06	12.7	94.6	455	0	5.67	2.04	0.87	0.19	0.03	5.4	0.11				0.7				49.1	146.3	10.8	0.892857143	4.901960784	2.779411765
1336	0	538	1	0	F	63	7	0	5.92	4.67	13.6	90.8	212	0.01	4.15	1.43	0.32	0.01	0.01	2.8	0.04	0.0621	30.6	3.004291845	1.7	0.2	0.1	31.38	52	155.8	5.6	1.374570447	1.398601399	2.902097902
1337	0	539	1	0	M	70	11	0	4.67	4.98	13.8	85.7	238	0	3.54	0.91	0.21	0	0.01	3.3	0.03	0.0329	26.5	3.618315722	2.8	-1	0.5	18.56	48.9	152.9	5.5	4.918032787	2.197802198	3.89010989
1338	0	539	0	1	M	70	12	0	4.44	4.6	12.9	83.9	226	0.01	3.68	0.51	0.25	0	0	5.9	0.03				3.6				46.6	150.7	3.9	3.619909502	1.960784314	7.215686275
1339	0	539	0	3	M	70	14	0	4.71	4.52	12.2	86.9	254	0	3.62	0.72	0.35	0.01	0.01	2.8	0.02				2.4				52.7	147.6		4.248366013	5.555555556	5.027777778
1340	0	539	0	5	M	70	16	0	6.26	4.64	12.5	86	328	0	4.96	0.79	0.42	0.06	0.03	6.3	0.05				2.8				52.6	148.9		5.63002681	5.063291139	6.278481013
1341	0	540	1	0	M	48	9	0	6.87	4.89	14.6	90.8	273	0	6.03	0.38	0.44	0.01	0.01	15.8	0.06	0.0337	31.1	4.810892587	0.8	1.2	0.1	15.56	50	155.9	13.2	1.041666667	2.631578947	15.86842105
1342	0	540	0	2	M	48	11	0	6.35	4.27	12.9	92	335	0	5.5	0.43	0.35	0.05	0.02	18.6	0.08				0.8				52.8	155.6	27.9	1.582278481	18.60465116	12.79069767
1343	0	540	0	4	M	48	12	0	8.68	4.64	13.6	92.9	412	0	6.46	1.16	0.83	0.19	0.04	13.8	0.16				0.8				52.5	153.6	37.1	3.194444444	20.68965517	5.568965517
1344	0	540	0	5	M	48	13	0	7.1	4.42	13.4	92.1	468	0	4.97	1.31	0.57	0.17	0.08	15.3	0.2				0.6				49.1	151.8	35.9	2.56916996	15.26717557	3.79389313
1345	0	541	1	0	M	65	5	1	4.26	4.02	12.2	93	102	0	2.48	1.15	0.59	0.01	0.03	2.6	0.03	0.0454	29.4	9.135399674	1	0.1	0.3	9.28	51	158.3	6.1	1.388888889	0.869565217	2.156521739
1346	0	541	0	1	M	65	6	1	3.85	4.06	12.3	91.9	95	0	2.56	0.87	0.4	0	0.02	5.7	0.05	0.041	27.5	8.996212121	1	-2	0.2	6.08	52.1	158.1	6.9	2.312138728	1.149425287	2.942528736
1347	0	542	1	0	F	34	7	0	4.11	4.78	14.1	88.3	175	0	3.18	0.71	0.22	0	0	1.4	0.01	0.0244	29.4	3.930131004	1	0	0.2	11.20	47.6	154.9	12.7	2.030456853	4.225352113	4.478873239
1348	0	542	0	4	F	34	11	0	4.14	4.29	12.4	89.3	276	0	3.03	0.74	0.25	0.11	0.01	4.1	0.03				1				51	149.6		3.896103896	8.108108108	4.094594595
1349	0	543	1	0	F	71	9	0	3.38	4.31	13.1	90	122	0	2.19	0.92	0.26	0	0.01	1.1	0.01	0.0185	31	12.22791293	1.8	-0.1	0.3	8.42	46.8	152.1	8.7	3.181818182	3.260869565	2.380434783
1350	0	544	1	0	M	39	5	0	2.78	5.09	15.2	88	230	0.01	1.51	0.9	0.37	0	0	0.0	0				1.2				49	150.6	5.6	1.597444089	2.222222222	1.677777778
1351	0	544	0	1	M	39	6	0	2.42	4.55	13.7	89.5	204	0	1.18	0.94	0.28	0.01	0.01	1.1	0.01				1				52.3	153	6.4	0.8	2.127659574	1.255319149
1352	0	544	0	3	M	39	8	0	3.89	4.73	14	88.2	233	0	2.35	1.16	0.37	0	0.01	0.9	0.01				1				53	152.2	6.9	0.923076923	3.448275862	2.025862069
1353	0	544	0	4	M	39	9	0	4.91	4.67	14.3	86.1	260	0	3.71	0.78	0.41	0	0.01	2.6	0.02	0.0177	30.8	2.504581552	1.5	-0.5	0.1	7.80	51	150.3	9	1.408450704	5.128205128	4.756410256
1354	0	544	0	6	M	39	11	0	3.69	4.87	14.4	89.1	384	0	2.28	0.99	0.39	0.02	0.01	2.0	0.02				1.1				54.2	149.6	16.2	3.714285714	11.11111111	2.303030303
1355	0	545	1	0	M	57	14	0	9.23	5.02	14.9	85.7	195	0	7.69	1.04	0.49	0	0.01	3.8	0.04				1.7				51.9	148.9		4.988662132	6.730769231	7.394230769
1356	0	545	0	2	M	57	16	0	9.55	4.79	14.6	86.6	263	0	8.61	0.64	0.29	0	0.01	10.9	0.07				1.6				49.9	145.4		6.513409962	10.9375	13.453125
1357	0	546	1	0	M	63	5	0	10.12	4.45	11.1	83.4	316	0.01	7.88	1.34	0.85	0.02	0.03	39.6	0.53	0.0405	21.9	6.902887139	5.3	-2.8	2.1	105.23	48.9	147.1	17.2	2.571041949	3.731343284	5.880597015
1358	0	547	1	0	F	51	7	1	8.92	5.63	14.2	78.7	330	0	7.41	1.09	0.39	0.01	0.02	9.2	0.1				6.7				51.1	155.8	13.8	9.302325581	10.09174312	6.798165138
1359	0	547	0	7	F	51	14	1	10.08	4.23	10.9	81.3	401	0.01	7.4	1.43	0.95	0.24	0.06	111.9	1.6	0.0436	23.8	4.726368159	4.2	-2.3	1.5	18.95	54.9	155.6	22.4	2.424942263	3.496503497	5.174825175
1360	0	547	0	7	F	51	14	1	11.83	4.46	11.3	81.2	444	0	8.82	1.51	1.12	0.34	0.04	114.6	1.73	0.0384	24.4	4.654519213	4.3	-1.7	1.3	20.67	53.6	157.9	19.9	1.19047619	3.973509934	5.841059603
1361	0	547	0	8	F	51	15	1	10.62	4.36	11.2	81.4	464	0	7.39	1.73	0.95	0.33	0.22	72.3	1.25	0.0541	24.9	4.560736734	4.3	-1.2	1.6	21.16	55.4	154.8	22	1.986754967	2.89017341	4.271676301
1362	0	547	0	9	F	51	16	1	9.98	4.33	11	81.3	475	0	6.68	1.86	1.09	0.3	0.05	46.2	0.86	0.0719	24.2	4.751199041	4.1	-1.7	1.5	22.57	53.2	157.7	18.8	0.619834711	2.688172043	3.591397849
1363	0	547	0	10	F	51	17	1	12.2	4.71	11.9	81.5	522	0	8.39	2.09	1.34	0.26	0.12	29.7	0.62	0.0951	25.3	3.951281688	4.2	-0.6	2	20.63	56.1	154.3	17.7	1.7727639	1.913875598	4.014354067
1364	0	547	0	11	F	51	18	1	12.11	4.33	11	82.4	495	0	7.54	2.62	1.56	0.27	0.12	14.9	0.39	0.0836	25.6	3.595600677	3.6	0.1	2.5	17.80	53.5	154.2	14.1	1.223902088	1.145038168	2.877862595
1365	0	547	0	12	F	51	19	1	12.25	4.45	11.1	82.9	520	0.01	7.83	2.52	1.55	0.26	0.09	8.3	0.21	0.0841	23.5	4.497072911	3.4	-2	2.4	23.38	51.3	154.8	11.5	0.914205345	1.19047619	3.107142857
1366	0	547	0	13	F	51	20	1	10.55	4.5	11.6	82.7	554	0	6.31	2.54	1.11	0.5	0.09	5.9	0.15	0.0837	23.4	4.641713864	3.6	-2.1	2.3	25.72	50.3	153.3	10.6	1.391650099	0.787401575	2.484251969
1367	0	547	0	14	F	51	21	1	8.37	4.41	11.2	81.2	580	0	4.38	2.28	0.95	0.66	0.1	5.7	0.13	0.0512	24.7	3.961456103	4.2	-1.2	1.6	22.98	50	154.6	9.2	0.830367734	0.877192982	1.921052632
1368	0	547	0	15	F	51	22	1	7.83	4.33	10.8	82	566	0	4.15	2.03	0.76	0.81	0.08	6.9	0.14	0.0662	25.3	4.002141614	3.6	-0.6	1.4	22.65	50.4	154.5	12.3	0.439882698	0.985221675	2.044334975
1369	0	547	0	16	F	51	23	1	9.35	4.37	11	82.6	564	0	5.42	2.33	0.73	0.79	0.08	7.3	0.17	0.0721	26.1	3.843167702	3.5	0.6	2.3	21.68	52.1	153.9	15.9	2.218934911	2.145922747	2.326180258
1370	0	548	1	0	M	35	20	1	8.22	3.92	10.4	83.7	410	0.01	5.92	0.81	1.32	0.12	0.05	248.1	2.01				5.5				46.2	141.8	23.5	1.513877208	4.938271605	7.308641975
1371	0	548	0	2	M	35	22	0	10.41	3.7	10	83.8	594	0	7.73	1.14	1.39	0.09	0.06	269.3	3.07				5.2				43.3	139.8	27.2	0.400641026	3.50877193	6.780701754
1372	0	549	1	0	M	66	0	0	4.76	4.28	14.1	98.1	150	0	3.19	0.71	0.62	0.21	0.03	4.2	0.03				0.5				50.5	149.5	11.3	0.526315789	0	4.492957746
1373	0	549	0	5	M	66	5	0	3.95	4.18	13.7	100	116	0	3.1	0.3	0.54	0	0.01	10.0	0.03				0.4				55.8	156.2	30	0.4	6.666666667	10.33333333
1374	0	549	0	9	M	66	9	0	3.54	4.33	14	98.2	89	0	2.86	0.38	0.3	0	0	5.3	0.02				0.5				53.4	156.9	10.5	4.119850187	2.631578947	7.526315789
1375	0	549	0	13	M	66	13	0	7.79	4.45	14.5	95.7	130	0	7.2	0.29	0.29	0	0.01	17.2	0.05				0.8				51.6	152.3	13.8	8.712121212	3.448275862	24.82758621
1376	0	549	0	15	M	66	15	0	8.84	3.88	12.6	94.3	140	0	8.25	0.34	0.21	0.03	0.01	44.1	0.15	0.0124	29.6	6.700767263	0.8	-3.6	0.3	9.38	54	151.9	17.6	16.66666667	2.941176471	24.26470588
1377	0	549	0	16	M	66	16	0	7.63	3.96	13.1	95.7	157	0	6.87	0.35	0.3	0.1	0.01	40.0	0.14	0.015	30.3	5.887600357	0.6	-3	0.2	9.24	54	152	14.3	9.489051095	2.857142857	19.62857143
1378	0	549	0	19	M	66	19	0	8.37	4.01	13	96.5	259	0	7.2	0.29	0.6	0.21	0.07	255.2	0.74	0.0184	33	4.055128545	0.6	0	0.5	10.50	49.3	151.2	17.2	2.372262774	3.448275862	24.82758621
1379	0	550	1	0	M	47	4	0	4.69	4.7	13.8	89.1	313	0	2.92	1.37	0.35	0.02	0.03	1.5	0.02				1.3				45	145.8	10.9	1.892744479	5.839416058	2.131386861
1380	0	551	1	0	M	76	12	0	3.34	4.23	12	85.1	149	0	2.67	0.4	0.26	0	0.01	2.5	0.01				2.1				56.6	150.9		6.926406926	5	6.675
1381	0	551	0	2	M	76	14	0	4.15	4.29	12	84.8	176	0											2.1
1382	0	551	0	6	M	76	18	0	5.52	4.09	11.5	84.6	294	0	4.11	0.68	0.63	0.08	0.02	10.3	0.07				2.2				55.3	148	11.8	1.913043478	2.941176471	6.044117647
1383	0	551	0	9	M	76	21	0	7.84	4.19	11.8	86.4	270	0	5.93	0.87	0.97	0.04	0.03	11.5	0.1				1.9				55.9	155.4	10.3	1.884570082	1.149425287	6.816091954
1384	0	552	1	0	M	50	2	0	3.62	4.99	15	91.2	179	0	1.58	1.2	0.8	0.02	0.02	0.0	0				1.2				48.2	156	4.2	0.973574409	0	1.316666667
1385	0	552	0	5	M	50	7	0	2.96	4.53	13.7	87.9	147	0	1.69	0.89	0.37	0	0.01	1.1	0.01				1.4				50.1	154.8	5.6	0	1.123595506	1.898876404
1386	0	552	0	7	M	50	9	0	3.98	4.61	13.6	89.4	186	0	2.61	0.77	0.59	0	0.01	2.6	0.02				1.2				48.2	153	2.6	0.575815739	1.298701299	3.38961039
1387	0	552	0	8	M	50	10	0	5.28	4.29	12.9	86.9	202	0	3.99	0.59	0.69	0	0.01	3.4	0.02				1.7				48.9	151.3	5.1	1.938610662	3.389830508	6.762711864
1388	0	553	1	0	M	26	8	0	3.8	4.52	13.5	84.5	125	0	2.89	0.81	0.1	0	0	1.2	0.01				2.6				57.1	156.7	9.9	11.76470588	3.703703704	3.567901235
1389	0	553	0	2	M	26	10	0	5.59	4.33	12.9	86.6	144	0	4.28	1.14	0.14	0.01	0.02	3.5	0.04				2				59.2	152.4	13.2	11.47540984	5.263157895	3.754385965
1390	0	554	1	0	M	70	9	1	9.73	3.53	11	92.1	120	0.01	8.9	0.54	0.2	0.08	0.01	14.8	0.08				0.7				48.7	146.8	9.3	8	3.703703704	16.48148148
1391	0	554	0	4	M	70	13	1	6.02	3.36	10.8	94.9	270	0.01	4.85	0.62	0.48	0.06	0.01	16.1	0.1	0.0175	24.9	4.610655738	0.5	-7.1	0.7	12.45	54.9	147.1	21	3.908045977	3.225806452	7.822580645
1392	0	554	0	5	M	70	14	1	7.03	3.06	9.7	96.7	246	0	5.64	0.77	0.54	0.07	0.01	9.1	0.07	0.0165	24.1	4.430705822	0.3	-7.5	1.2	10.90	57.8	152.5	24.7	1.632653061	3.896103896	7.324675325
1393	0	554	0	6	M	70	15	1	16.31	3.23	10.1	98.1	325	0	13.97	1.23	0.92	0.15	0.04	27.6	0.34	0.031	24.7	5.422057917	0.3	-7.4	0.7	17.62	62	155.9	26	5.125148987	2.43902439	11.35772358
1394	0	554	0	7	M	70	16	1	12.99	3.07	9.6	97.1	297	0.01	10.97	1.14	0.74	0.1	0.04	24.6	0.28	0.0304	22.8	5.050933786	0.4	-9	1.1	15.00	58.9	156.6	21.1	9.912536443	0	9.622807018
1395	0	554	0	8	M	70	17	1	11.34	3.17	10.1	97.5	322	0	8.89	1.59	0.67	0.13	0.06	8.2	0.13	0.0285	22.2	3.546933177	0.4	-9.4	1.5	11.42	59.1	159.2	20.1	2.684563758	1.257861635	5.591194969
1396	0	554	0	9	M	70	18	1	10.59	3.16	9.9	97.2	337	0.01	7.67	1.87	0.8	0.18	0.07	7.5	0.14	0.0218	26.4	3.594326792	0.4	-4.9	1.8	12.11	59	160	22.5	1.833568406	2.673796791	4.101604278
1397	0	554	0	10	M	70	19	1	13.4	3.26	10.2	96.6	390	0.01	10.11	1.97	0.96	0.26	0.1	12.7	0.25	0.0333	30.7	3.752797383	0.5	-0.5	2	14.64	56.8	157.4	21.8	1.936218679	2.030456853	5.131979695
1398	0	554	0	11	M	70	20	1	14.37	3.18	9.9	98.4	433	0	10.77	2	1.09	0.4	0.11	13.5	0.27	0.055	32.6	3.232636928	0.3	1.4	1.9	14.00	52.4	153.2	18	2.290836653	1.5	5.385
1399	0	555	1	0	F	38	8	1	6.51	4.23	11.9	82.7	247	0	5.55	0.77	0.17	0	0.02	7.8	0.06				3.2				52.4	152	7.8	5.454545455	2.597402597	7.207792208
1400	0	555	0	3	F	38	11	1	6.47	4.46	12.4	86.1	345	0.01	4.54	0.93	0.52	0.4	0.08	39.8	0.37	0.0205	23.7	4.517453799	2.5	-4.2	1.8	15.59	55.7	147.1	19.4	6.638115632	4.301075269	4.88172043
1401	0	555	0	4	F	38	12	1	9.94	4.67	13	84.6	423	0.01	7.54	1.08	0.87	0.41	0.04	92.6	1	0.0299	25.1	4.059985369	2.8	-3.1	1	17.17	53.3	147.7	23.1	4.60199005	2.777777778	6.981481481
1402	0	555	0	5	F	38	13	1	12.76	4.29	12	86.2	418	0	9.6	1.26	1.68	0.19	0.03	114.3	1.44	0.0262	23.5	3.078245916	2.2	-4.1	1.6	12.87	52	147	11.1	3.457106274	0	7.619047619
1403	0	555	0	6	F	38	14	1	12.51	3.78	10.5	86.8	383	0.01	9.2	1.61	1.43	0.19	0.08	54.7	0.88	0.0227	23	3.398738612	2.1	-4.8	1.2	13.02	50.5	148.3	11.2	1.04	1.242236025	5.714285714
1404	0	555	0	7	F	38	15	1	15.91	3.69	10.3	86.4	488	0	12.45	1.64	1.57	0.18	0.07	42.1	0.69	0.0284	22.5	3.178155774	2.2	-5.2	1.5	15.51	53.2	147	14	2.943237561	1.219512195	7.591463415
1405	0	555	0	8	F	38	16	1	18.14	4.03	11.1	84.9	598	0	14.59	1.6	1.53	0.32	0.1	30.6	0.49	0.0298	24.4	2.762022195	2.6	-3.4	1.3	16.52	51.8	151.2	11.3	1.82748538	0.625	9.11875
1406	0	555	0	9	F	38	17	1	16.56	3.91	10.9	85.7	622	0	13.36	1.52	1.13	0.44	0.11	27.0	0.41	0.0313	24	2.573170732	2.3	-3.8	1.1	16.01	51.3	154.2	10.5	0.952380952	1.315789474	8.789473684
1407	0	555	0	10	F	38	18	1	19.8	3.92	10.9	84.9	679	0	16.77	1.26	1.34	0.32	0.11	38.1	0.48	0.04	28.2	2.755565161	2.4	-0.1	0.5	18.71	50.1	155.7	15.1	1.151315789	1.587301587	13.30952381
1408	0	555	0	11	F	38	19	1	15.86	3.78	10.5	86.2	697	0	12.42	1.44	1.62	0.26	0.12	34.7	0.5	0.0465	29.1	2.849820605	2.1	1.1	0.6	19.86	50.3	151.5	16.7	0.619834711	2.083333333	8.625
1409	0	555	0	12	F	38	20	1	16.3	3.8	10.4	87.6	765	0	12.33	1.76	1.84	0.2	0.17	45.5	0.8	0.0695	31.3	2.312523791	1.9	3.6	1.1	17.69	48	146.3	10.8	2.548903379	0	7.005681818
1410	0	556	1	0	F	71	10	1	7.79	4.16	12.4	86.8	183	0	6.44	1.2	0.13	0.01	0.01	9.2	0.11	0.027	26.9	3.7	1.3	-3.3	0.2	6.40	55.6	154.7	8.3	14.7826087	4.166666667	5.366666667
1411	0	556	0	4	F	71	14	1	11	3.41	10.2	90.3	274	0.01	9.75	0.69	0.42	0.07	0.07	117.4	0.81	0.0232	26.8	2.845849802	1.1	-2.9	1.1	7.80	60.8	151.6	14.5	10.85271318	5.797101449	14.13043478
1412	0	556	0	5	F	71	15	1	10.71	3.21	9.8	90.7	281	0	9.29	0.69	0.54	0.17	0.02	150.7	1.04	0.0308	26	3.177660087	1.2	-3.9	0.8	8.93	59.4	152.2	15.9	12.91585127	4.347826087	13.46376812
1413	0	556	0	6	F	71	16	1	11.1	2.92	9.7	92.1	316	0.01	10.27	0.28	0.43	0.05	0.07	242.9	0.68	0.0245	23.6	3.022092539	1.3	-5.8	1.5	9.55	62.3	155.3	17.9	29.41176471	0	36.67857143
1414	0	556	0	7	F	71	17	1	16.08	2.99	9.9	90.6	380	0	14.96	0.44	0.59	0.02	0.07	190.9	0.84	0.026	22.5	2.58681786	1.5	-7.1	1.4	9.83	62.4	155.6	15.9	16.23616236	2.272727273	34
1415	0	556	0	8	F	71	18	1	16.54	2.73	9.2	91.9	361	0	15.12	0.49	0.79	0.06	0.08	124.5	0.61	0.0374	21.6	2.064019591	1.4	-7.6	1.7	7.45	58.4	155.2	24.5	8.356164384	6.12244898	30.85714286
1416	0	556	0	9	F	71	19	1	13.7	2.72	9.4	94.1	447	0.01	11.84	0.52	1.04	0.18	0.12	157.7	0.82	0.0495	22.8	2.412249025	1.1	-6.6	1.6	10.78	56.1	152.3	23.1	1.995798319	5.769230769	22.76923077
1417	0	556	0	10	F	71	20	1	10.31	3.15	10.3	91.7	477	0	8.08	1.02	1.05	0.15	0.01	51.0	0.52	0.0671	25.7	1.656867985	1.6	-3.8	1.3	7.90	54.1	151.9	18.6	2.860169492	3.921568627	7.921568627
1418	0	556	0	11	F	71	21	1	9.14	2.85	9.6	93.3	371	0.01	7.58	0.66	0.69	0.14	0.07	71.2	0.47	0.0638	27.9	2.716049383	1.5	-1.1	2.1	10.08	54.2	153.4	28.8	3.453689168	4.545454545	11.48484848
1419	0	556	0	12	F	71	22	1	10.07	2.97	9.6	93.3	352	0.01	8.42	0.71	0.78	0.09	0.07	90.1	0.64	0.0861	29.4	3.651505445	1.4	0.7	2.8	12.85	54	152.6	26.8	3.938115331	4.225352113	11.85915493
1420	0	556	0	13	F	71	23	1	10.43	3.25	10	94.5	457	0	7.82	1.09	1.12	0.32	0.08	51.4	0.56	0.1047	29.4	3.359572674	1.4	0.7	2.5	15.35	53	152.1	26.6	4.026845638	5.504587156	7.174311927
1421	0	557	1	0	M	81	6	1	3.88	4.19	10.7	83.1	95	0.01	2.88	0.77	0.23	0	0	5.2	0.04				8.2				48.4	156.7	9.1	13.08411215	1.298701299	3.74025974
1422	0	557	0	2	M	81	8	1	4.32	4.09	10.6	83.1	109	0.01	3.25	0.9	0.16	0	0.01	5.6	0.05	0.0299	31.5	5.178211163	8.3	5.5	2.6	5.64	51.4	150.5		29.16666667	0	3.611111111
1423	0	558	1	0	F	40	6	1	9.22	5.13	13.7	82.7	228	0	7.1	1.68	0.42	0	0.02	3.0	0.05				5				53.2	156.1	11.3	13.93442623	7.142857143	4.226190476
1424	0	558	0	0	F	40	6	1	6.97	4.9	13.1	82	231	0.01	5.9	0.8	0.25	0	0.02	7.5	0.06	0.0206	26.2	4.758471521	5.1	-1.3	0.6	10.99	55.5	154.9		19.00452489	11.25	7.375
1425	0	558	0	1	F	40	7	1	8.34	4.7	12.6	82.3	224	0	6.49	1.41	0.41	0	0.03	6.4	0.09	0.0268	27.2	5.736384144	5.1	-0.4	0.4	12.85	56.5	154.2		21.40921409	7.092198582	4.602836879
1426	0	558	0	2	F	40	8	1	6.32	4.68	12.7	82.5	253	0	4.01	1.84	0.41	0.03	0.03	3.8	0.07	0.0323	27.4	7.64724021	5	0	0.8	19.35	55.6	150.8		19.58762887	13.04347826	2.179347826
1427	0	558	0	3	F	40	9	1	6.97	4.97	13.4	83.5	311	0	4.53	1.72	0.63	0.06	0.03	4.1	0.07	0.0244	27.5	6.756756757	4.4	0.1	0.6	21.01	54.7	148.2	25.6	5.739130435	19.18604651	2.63372093
1428	0	558	0	4	F	40	10	1	6.87	4.68	12.4	83.5	381	0	3.5	2.45	0.72	0.15	0.05	1.6	0.04	0.0314	27.4	6.13742495	4.5	0	0.6	23.38	54.3	149.1	25.3	6.501547988	14.28571429	1.428571429
1429	0	558	0	4	F	40	10	1	10.1	4.71	12.4	86	426	0	6.75	2.23	0.89	0.18	0.05	2.7	0.06	0.0349	26.2	5.2734375	3.6	-0.9	0.8	22.46	53.3	147.7	27.4	3.109452736	12.10762332	3.02690583
1430	0	558	0	5	F	40	11	1	8.88	4.48	11.9	85.9	420	0	5.9	1.82	0.95	0.16	0.05	3.8	0.07	0.0381	25.9	5.225190096	3.3	-1.2	1.1	21.95	54.5	145.4	28.6	3.604651163	8.791208791	3.241758242
1431	0	558	0	6	F	40	12	1	10.91	4.25	11.4	86.4	469	0	7.66	2.03	1.02	0.16	0.04	3.9	0.08	0.0353	26.4	4.533333333	2.9	-0.5	1.3	21.26	51.2	146.5	23.6	2.553191489	6.403940887	3.773399015
1432	0	558	0	7	F	40	13	1	9.42	4.21	11.2	86	497	0	5.79	2.54	0.91	0.13	0.05	2.8	0.07	0.0438	26.5	5.253650459	3.1	-0.5	1.1	26.11	51.1	148	18.9	2.497027348	4.724409449	2.279527559
1433	0	558	0	8	F	40	14	1	9.59	4.38	11.6	85.4	571	0											3.7
1434	0	559	1	0	M	80	4	1	3.86	4.34	13.4	87.1	159	0	2.42	1.01	0.43	0	0	2.0	0.02				1.2				48	151.9		7.01754386	2.97029703	2.396039604
1435	0	559	0	0	M	80	4	1	3.43	4.33	13.5	86.1	149	0	2.22	0.98	0.23	0	0	2.0	0.02	0.0186	30.7	3.684210526	1.4	-0.5	0.1	5.49	46.4	152.4	6.1	6.976744186	2.040816327	2.265306122
1436	0	559	0	2	M	80	6	1	4.67	4.87	14.8	87.1	195	0	3.45	1.01	0.2	0	0.01	5.0	0.05	0.0258	31.2	3.287021349	1.3	0	0.2	6.41	44.5	146.4	7.9	5.027932961	2.97029703	3.415841584
1437	0	559	0	2	M	80	6	1	7.26	4.26	13.2	86.9	234	0	6.04	0.82	0.39	0	0.01	12.2	0.1	0.0234	31.5	4.349196344	1.4	0.4	0.1	10.18	46	146.3	12.2	11.87845304	6.097560976	7.365853659
1438	0	559	0	3	M	80	7	1	12	4.6	13.8	88	256	0	9.79	1.78	0.37	0.01	0.05	16.3	0.29	0.0258	31.5	2.646202699	1.4	0.4	0.3	6.77	48.9	145.1		15.36144578	8.988764045	5.5
1439	0	559	0	4	M	80	8	1	12.98	4.5	13.7	89.8	240	0.01	10.88	1.51	0.5	0.03	0.06	27.8	0.42	0.0266	31.4	3.462719911	1.3	0.5	0.6	8.31	51.5	145.9		20.56892779	13.24503311	7.205298013
1440	0	559	0	5	M	80	9	1	12.91	4.15	12.7	90.4	239	0	11.56	0.88	0.34	0.07	0.06	85.2	0.75	0.0282	28.8	3.100137174	1.2	-1.9	0.8	7.41	54.2	148.4		30.76923077	14.77272727	13.13636364
1441	0	559	0	6	M	80	10	1	11.92	4.24	13	92.2	294	0.02	10.28	1	0.49	0.08	0.07	62.0	0.62	0.0331	25.6	2.956020187	1.1	-4.7	1.2	8.69	54.4	150		18.04008909	17	10.28
1442	0	559	0	7	M	80	11	1	7.67	3.98	12	94	279	0.02	6.38	0.81	0.37	0.04	0.07	55.6	0.45	0.0247	24.2	3.21248279	0.8	-5.6	1.2	8.96	58.7	152.1		14.83679525	17.28395062	7.87654321
1443	0	559	0	8	M	80	12	1	5.5	3.47	10.5	97.4	239	0.02	4.03	0.84	0.44	0.13	0.06	36.9	0.31	0.0156	22.6	3.217821782	0.5	-6.7	1.5	7.69	58.6	150.7		7.088607595	11.9047619	4.797619048
1444	0	559	0	9	M	80	13	1	7.72	3.74	11.2	98.9	252	0.01											0.6
1445	0	560	1	0	M	75	7	1	29.59	4.42	13.3	88.7	401	0	28.35	0.37	0.79	0.03	0.05	116.2	0.43				2.2				47.2	148.9	16.2	1.278409091	8.108108108	76.62162162
1446	0	560	0	1	M	75	8	1	28.38	4.43	13.2	91	364	0.01	26.77	0.57	0.92	0.04	0.08	71.9	0.41	0.0744	24.7	3.268663011	1.9	-5.6	0.4	11.90	48.3	146.4	19.3	2.644230769	7.01754386	46.96491228
1447	0	560	0	2	M	75	9	1	18.24	4.07	12.2	93.4	287	0	17	0.42	0.7	0.05	0.07	88.1	0.37	0.0488	22.3	2.722177742	1.6	-7.4	1	7.81	48.8	146.9	23.8	5.740181269	14.28571429	40.47619048
1448	0	560	0	3	M	75	10	1	18.18	4.15	12.4	91.1	256	0.01	17.08	0.44	0.57	0.01	0.08	188.6	0.83	0.0473	25.8	4.139562389	2.1	-4.5	0.4	10.60	50.6	148.3	34.1	7.514450867	22.72727273	38.81818182
1449	0	560	0	4	M	75	11	1	19.89	4.25	12.7	87.5	313	0.05	18.56	0.54	0.67	0.01	0.11	200.0	1.08	0.034	24.1	3.1	2.8	-6.1	0.6	9.70	48.9	145.6	38.9	5.024311183	31.48148148	34.37037037
1450	0	560	0	5	M	75	12	1	25.61	3.98	11.9	87.4	286	0.14	23.32	0.83	1.27	0.01	0.18	331.3	2.75	0.0346	25.8	3.050430504	2.6	-4.4	0.8	8.72	49.7	144.3	24.1	1.572052402	13.25301205	28.09638554
1451	0	560	0	6	M	75	13	1	27.38	4.25	12.5	86.6	267	0.17	24.48	1.06	1.8	0.02	0.02	354.7	3.76	0.0684	27.2	2.916778164	3.1	-2.5	1.3	7.79	48.7	143.9	13.2	1.517911354	6.603773585	23.09433962
1452	0	560	0	7	M	75	14	1	22.66	3.83	11.4	87.2	210	0.05	20.28	0.8	1.38	0.07	0.13	288.8	2.31	0.0835	30.6	2.271163111	3	0.8	1	4.77	51.3	147.9	16.3	1.6840417	3.75	25.35
1453	0	560	0	8	M	75	15	1	27.84	3.86	11.5	86.5	210	0.01	25.29	0.9	1.49	0.07	0.09	177.8	1.6	0.1127	30.4	3.480589023	3	0.6	0.9	7.31	51.3	148.8	12.2	2.704733283	0	28.1
1454	0	560	0	9	M	75	16	1	24.67	3.73	11	86.1	225	0.01	22.31	0.7	1.43	0.15	0.08	167.1	1.17	0.1302	28.3	2.019543974	3.2	-1.4	0.9	4.54	50.8	149	22.9	1.44486692	2.857142857	31.87142857
1455	0	560	0	10	M	75	17	1	25.02	3.55	10.5	87.9	214	0.01	21.98	1.03	1.74	0.21	0.06	87.4	0.9	0.1292	25.8	2.325581395	2.3	-3.7	1.1	4.98	49.9	150.1	17.5	0.949367089	1.941747573	21.33980583
1456	0	561	1	0	M	73	5	0	9.28	5.27	16.3	88	96	0	8.2	0.62	0.44	0	0.02	11.3	0.07				1.6				53	149.9	16.1	14.28571429	6.451612903	13.22580645
1457	0	561	0	1	M	73	6	0	8.99	5.03	16.1	89.3	90	0.01	7.6	0.96	0.41	0	0.02	6.3	0.06	0.0287	28.6	9.923011121	1.6	-2.7	0.2	8.93	53.1	146.5		10.42780749	6.25	7.916666667
1458	0	561	0	2	M	73	7	0	6.96	4.41	14.1	88.7	106	0	5.68	0.93	0.32	0.02	0.01	5.4	0.05	0.0225	29.2	10.71149335	1.7	-2.2	0.2	11.35	55.6	146.3		28.61952862	7.52688172	6.107526882
1459	0	561	0	7	M	73	12	0	7.3	4.41	13.9	86.8	269	0	4.19	2.03	0.81	0.23	0.04	8.4	0.17	0.0573	31.2	5.485115766	2.4	0	0.3	14.75	52.1	147.4	9.4	2.029769959	2.955665025	2.064039409
1460	0	562	1	0	M	73	4	0	6.15	4.99	14.7	88	181	0	5.19	0.6	0.35	0	0.01	6.7	0.04				1.9				48.9	156.9	10	0.324675325	1.666666667	8.65
1461	0	562	0	3	M	73	7	0	5.32	4.82	14.3	84.4	184	0	4.02	0.88	0.41	0	0.01	4.5	0.04	0.0564	29.4	10.87155963	2.5	-1.1	0.1	20.00	51.9	150.7	6.8	2.393617021	2.272727273	4.568181818
1462	0	563	1	0	M	59	2	0	5.16	5.65	15.3	78.8	193	0	3.8	0.84	0.49	0	0.03	2.4	0.02				4.6				49.8	158.9	10.7	0.91954023	2.380952381	4.523809524
1463	0	563	0	1	M	59	3	0	5.93	5.37	14.4	77.7	177	0	4.09	1.24	0.59	0	0.01	4.0	0.05	0.0258	27.4	2.656894182	5.5	-1	0.1	4.70	54.2	156.5	12.1	2.466793169	1.612903226	3.298387097
1464	0	563	0	2	M	59	4	0	6.3	5.41	14.7	77.8	189	0	4.63	1.22	0.44	0	0.01	2.5	0.03	0.0216	28.5	3.68397692	5.5	0.3	0.1	6.96	53.3	156.7	9	2.278481013	0.819672131	3.795081967
1465	0	564	1	0	M	26	7	0	2.43	5.73	16.2	84.5	106	0	1.73	0.55	0.15	0	0	1.8	0.01				2.4				51	149.8	5.5	2.290076336	0	3.145454545
1466	0	564	0	5	M	26	12	0	6.19	5.39	15.3	83.9	174	0	5.61	0.39	0.18	0	0.01	12.8	0.05				2.5				50.8	146.6	7.7	7.236842105	2.564102564	14.38461538
1467	0	564	0	7	M	26	14	0	4.82	4.86	13.8	83.5	200	0	3.92	0.55	0.34	0	0.01	5.5	0.03	0.0219	31.1	8.392434988	2.7	1.6	0.2	16.78	53.3	144.7	7.3	8.544303797	1.818181818	7.127272727
1468	0	565	1	0	F	63	22	0	4.6	4.76	14.4	92	154	0	3.43	0.97	0.19	0	0.01	3.1	0.03				1.3				49.7	154.4		12.57142857	8.24742268	3.536082474
1469	0	565	0	2	F	63	24	0	5.23	4.38	13.4	90.9	170	0.01	4.02	0.88	0.32	0	0.01	5.7	0.05	0.0175	29.4	8.198158702	1.4	-1.7	0.4	13.94	53.4	149		12.63157895	10.22727273	4.568181818
1470	0	565	0	4	F	63	26	0	5.92	4.4	13.5	89.1	274	0	3.46	1.87	0.51	0.01	0.07	2.7	0.05	0.022	29.1	6.731059463	1.8	-2.1	0.3	18.44	51.6	147.5	32.6	6.26349892	25.6684492	1.85026738
1471	0	565	0	7	F	63	29	0	6.33	4.43	13.3	90.3	452	0.01	3.91	1.45	0.8	0.14	0.03	4.1	0.06	0.0567	30.8	3.501267427	1.4	-0.1	0.4	15.83	50.9	145.9	13.1	0.816326531	4.827586207	2.696551724
1472	0	566	1	0	F	56	5	1	4.72	4.17	13.3	91.4	179	0	3.98	0.57	0.17	0	0	3.5	0.02				1				54.6	156.8	7	13.33333333	1.754385965	6.98245614
1473	0	566	0	2	F	56	7	1	7.4	3.73	12	93.6	270	0.01	6.38	0.8	0.22	0	0	8.8	0.07	0.0291	26.3	1.252236136	0.7	-6	0.3	3.38	52.4	152		15.19607843	3.75	7.975
1474	0	566	0	4	F	56	9	1	30.75	3.64	11.6	95.3	354	0.01	28.97	1.07	0.62	0.01	0.08	223.4	2.39	0.0357	28.1	2.260559191	0.8	-4	0.2	8.00	65	155	14	45.71428571	6.542056075	27.07476636
1475	0	566	0	5	F	56	10	1	25.01	4.08	13	96.8	357	0.03	22.75	1.22	0.88	0.1	0.06	144.3	1.76	0.0347	24.9	3.058161351	0.7	-7	1.4	10.92	61.6	152.3		23.73300371	7.37704918	18.64754098
1476	0	566	0	5	F	56	10	1	14.53	3.65	11.5	94.8	199	0.03	12.67	0.97	0.79	0.06	0.04	39.2	0.38	0.0234	23.3	2.861313869	0.9	-8.5	1	5.69	66	155	16.5	13.51351351	10.30927835	13.06185567
1477	0	566	0	5	F	56	10	1	13.08	3.52	11.2	96	178	0.04	11.23	0.99	0.68	0.13	0.05	42.4	0.42	0.0225	24.7	2.596515203	0.8	-7.1	0.9	4.62	65.3	155.4	13.1	14.68189233	6.060606061	11.34343434
1478	0	566	0	6	F	56	11	1	10.38	3.44	10.9	95.9	161	0.03	8.85	0.78	0.56	0.15	0.04	51.3	0.4	0.0244	25.5	2.399040384	0.8	-6.3	1.2	3.86	70.6	154.7		18.56866538	6.41025641	11.34615385
1479	0	566	0	7	F	56	12	1	10.26	3.24	10.3	98.5	128	0.02	8.76	0.62	0.65	0.18	0.05	82.3	0.51	0.0282	26	3.409090909	0.7	-5.4	2.2	4.36	64.3	153.1	16.1	9.650582363	4.838709677	14.12903226
1480	0	566	0	10	F	56	15	1	8.15	2.58	8.2	95	143	0.02	6.86	0.57	0.56	0.14	0.02	101.8	0.58	0.0802	25.6	6.690419636	0.9	-5.9	1.4	9.57	63.6	157.3		18.76208897	1.754385965	12.03508772
1481	0	566	0	11	F	56	16	1	7.97	2.36	7.6	95.8	176	0.01	6.69	0.55	0.56	0.16	0.01	63.6	0.35	0.088	22.6	5.499276411	1	-8.5	2	9.68	60.5	159.6	23.6	9.475806452	7.272727273	12.16363636
1482	0	567	1	0	M	63	6	1	8.58	4.01	11.5	86.8	263	0	8.03	0.37	0.16	0.01	0.01	37.8	0.14				1.7				52.2	150.4	13.5	13.66906475	5.405405405	21.7027027
1483	0	567	0	4	M	63	10	1	6.51	3.5	11	92	193	0.01	5.35	0.65	0.32	0.14	0.05	61.5	0.4	0.0284	21.6	5.463743676	1.2	-7.7	1.2	10.55	55.3	149.6	18.5	10.16393443	6.153846154	8.230769231
1484	0	567	0	5	M	63	11	1	8.29	3.47	10.9	91.4	194	0.01	7.02	0.69	0.41	0.12	0.05	82.6	0.57	0.0243	20.1	5.64612326	1.4	-9.3	1.1	10.95	56.3	153.7	18.8	6.25	5.797101449	10.17391304
1485	0	567	0	6	M	63	12	1	9.65	3.65	11.7	91.5	266	0	8.13	0.79	0.55	0.1	0.08	78.5	0.62	0.0285	21	5.839002268	1.4	-8.4	1.1	15.53	57	154.3	21.5	3.307392996	5.063291139	10.29113924
1486	0	567	0	7	M	63	13	1	9	3.43	11	91.5	287	0	7.83	0.61	0.42	0.1	0.04	72.1	0.44	0.0319	22	4.146510021	1.6	-7.3	1.1	11.90	57.1	157.7	21.3	4.392764858	6.557377049	12.83606557
1487	0	567	0	8	M	63	14	1	11.71	3.35	11	93.1	383	0	10.3	0.77	0.46	0.1	0.08	35.1	0.27	0.0422	22.3	4.169854629	1.2	-6.7	1.6	15.97	59.1	157.1	23.4	4.337349398	7.792207792	13.37662338
1488	0	567	0	9	M	63	15	1	12.34	3.14	10.1	94.3	424	0	10.97	0.7	0.51	0.09	0.07	37.1	0.26	0.038	24.2	3.790827551	1.2	-4.7	1.8	16.07	57.3	157.2	24.3	3.198294243	8.571428571	15.67142857
1489	0	567	0	10	M	63	16	1	12.95	3.35	10.5	94	518	0	10.93	0.94	0.68	0.33	0.07	29.8	0.28	0.0549	27	3.292847503	1.2	-1.6	2	17.06	52.6	155.2	23.4	2.00617284	11.70212766	11.62765957
1490	0	567	0	11	M	63	17	1	17.28	3.5	10.4	92	520	0.01	14.71	1.11	0.83	0.56	0.07	34.2	0.38	0.0774	28.4	3.058727569	1.3	0	2.4	15.91	52.5	152.5	22.5	2.4	10.81081081	13.25225225
1491	0	567	0	12	M	63	18	1	15.9	3.5	10.6	93.1	568	0.01	13.07	1.39	0.58	0.78	0.08	19.4	0.27	0.1005	28.8	3.124599821	1.2	0.2	1.8	17.75	51.1	153	15.8	2.452830189	6.474820144	9.402877698
1492	0	567	0	13	M	63	19	1	17.06	3.63	10.7	91.7	593	0.01	14.17	1.33	0.72	0.76	0.08	18.8	0.25	0.0955	27.8	2.894011526	1.5	-0.5	2.1	17.16	51	155.3	15.8	1.996927803	6.015037594	10.65413534
1493	0	568	1	0	M	62	6	0	4.14	3.67	15.9	121	79	0.04								0.0165	38.3	6.049495875	0.3	-3.3	0.3	4.78
1494	0	568	0	1	M	62	7	0	4.13	3.52	15.2	119.9	79	0.03	2.67	1.04	0.41	0	0.01	3.8	0.04	0.0141	37.7	4.823747681	0.3	-3.7	0.4	3.81	56.4	168.9		16.94444444	3.846153846	2.567307692
1495	0	569	1	0	M	75	7	0	4.64	5.42	16.3	86.9	144	0	2.62	1.37	0.63	0	0.02	2.2	0.03	0.032	28.9	5.769230769	1.9	-2	0.2	8.31	52.1	153.7	8	2.777777778	1.459854015	1.912408759
1496	0	569	0	1	M	75	8	0	4.04	5.28	15.7	86	139	0	2.5	1.12	0.41	0	0.01	0.9	0.01	0.0222	32.2	2.673492605	2.1	1.3	0.1	3.72	49.9	155.6	6.3	0.777202073	1.785714286	2.232142857
1497	0	569	0	1	M	75	8	0	4.23	5.05	15.2	87.1	88	0	2.56	1.15	0.5	0	0.02	0.9	0.01	0.0202	31.6	9.751243781	2	0.7	0.1	8.58	50.4	154.4	4.3	2.183406114	0	2.226086957
1498	0	570	1	0	M	48	14	0	7.37	4.79	14.6	87.3	194	0	5.16	1.57	0.63	0	0.01	4.5	0.07	0.024	28.9	3.061646669	1.2	-2.1	0.2	5.94	52.2	149.5	7	1.943462898	2.547770701	3.286624204
1499	0	570	0	1	M	48	15	0	7.87	5.01	15	86.8	207	0	6.04	1.24	0.57	0	0.02	5.6	0.07	0.0256	29.1	2.279305355	1.4	-2	0.3	4.72	52.7	148.1	6.5	3.632887189	2.419354839	4.870967742
1500	0	570	0	3	M	48	17	0	5.28	4.88	14.7	86.1	231	0	3.33	1.23	0.65	0.05	0.02	4.9	0.06	0.0303	30.7	2.213279678	1.4	-0.3	0.3	5.11	53.9	145.6	13.8	2.447552448	4.87804878	2.707317073
1501	0	571	1	0	F	56	9	0	7.42	4.37	12.9	83.8	143	0	6.29	0.84	0.28	0	0.01	4.8	0.04	0.0236	25.4	8.925708177	2.6	-4.7	0.2	12.76	55.3	153.2	11.9	3.461538462	4.761904762	7.488095238
1502	0	571	0	1	F	56	10	0	6.37	4.02	11.7	85.3	131	0.01	4.96	1.18	0.21	0	0.02	4.2	0.05	0.0193	25.7	9.371492705	2.1	-4.3	0.5	12.28	58.1	151.3	10.2	8.947368421	2.542372881	4.203389831
1503	0	571	0	2	F	56	11	0	5.91	3.85	11.5	84.9	143	0	4.74	1	0.14	0.01	0.02	3.0	0.03	0.0196	25.9	6.603773585	2.4	-4	0.4	9.44	58.7	152	9	9.302325581	3	4.74
1504	0	571	0	3	F	56	12	0	6.75	3.77	11.2	84.9	159	0.01	5.53	1.01	0.18	0.01	0.02	7.9	0.08	0.017	27.9	5.804524114	2.3	-1.9	0.6	9.23	59	149.7	8.9	13.58024691	2.97029703	5.475247525
1505	0	572	1	0	M	69	8	1	5.79	4.83	15.9	95.9	252	0	4.78	0.56	0.44	0	0.01	10.7	0.06	0.0188	33.5	3.205342237	0.4	-0.3	0.1	8.08	50.1	150.2	17.9	9.045226131	10.71428571	8.535714286
1506	0	572	0	1	M	69	9	1	7.34	4.89	16.3	96.9	240	0	5.55	1.29	0.48	0	0.02	8.5	0.11	0.0215	34.5	3.351420364	0.4	0.5	0.1	8.04	52.9	148.7		18.87640449	6.976744186	4.302325581
1507	0	573	1	4	M	71	13	1	12.19	3.5	10.4	96.3	211	0.02	11.32	0.47	0.25	0.1	0.05	95.7	0.45	0.021	30	7.61451517	1.1	0.2	0.7	16.07	56.2	155.6		8.888888889	19.14893617	24.08510638
1508	0	574	1	2	M	65	16	0	2.11	4.74	13.7	85.2	162	0	1.55	0.34	0.19	0.03	0	2.9	0.01				2.7				53.1	153.7	8.8	1.183431953	0	4.558823529
1509	0	574	0	4	M	65	18	0	2.61	4.63	13.2	86.4	201	0	2.24	0.21	0.14	0.02	0	9.5	0.02				2.4				48.1	152.7	4.8	2.362204724	0	10.66666667
1510	0	574	0	6	M	65	20	0	2.88	4.37	12.6	84.7	214	0	2.59	0.16	0.11	0.02	0	18.8	0.03	0.0323	30.7	4.333970682	3	1.3	0.3	9.27	54.4	152.7		12.5	0	16.1875
1511	0	574	0	11	M	65	25	0	3.87	4.47	12.9	83.7	333	0	3.59	0.17	0.1	0	0.01	17.6	0.03	0.0308	29.9	3.910269603	3.7	0.7	0.5	13.02	53.6	155.8	29.4	0	0	21.11764706
1512	0	574	0	13	M	65	27	0	3.39	3.93	11.2	87.5	292	0	3.07	0.18	0.1	0.04	0	5.6	0.01	0.0318	26.8	4.038843522	2.4	-1.8	0.9	11.79	53.2	157.6		8.24742268	0	17.05555556
1513	0	574	0	15	M	65	29	0	3.64	4	11.5	85.8	337	0	3.25	0.16	0.15	0.08	0	18.8	0.03	0.0312	28.5	4.05654579	2.9	-0.6	0.8	13.67	51.7	157.2	25	5.072463768	0	20.3125
1514	0	574	0	17	M	65	31	0	4.67	4.09	11.4	86.8	374	0	4.08	0.24	0.23	0.11	0.01	20.8	0.05	0.056	29.6	3.693407466	2.7	1	0.9	13.81	52.9	156.1	29.2	4.186046512	4.166666667	17
1515	0	575	1	4	F	65	11	0	6.81	4.02	12	90.8	346	0	5.62	0.66	0.52	0	0.01	13.6	0.09				1				54.1	153.7	19.7	2.795698925	10.60606061	8.515151515
1516	0	576	1	13	M	64	8	0	7.89	4.96	14.4	86.7	411	0	5.04	2.17	0.55	0.08	0.05	1.4	0.03	0.064	34	1.601213551	1.9	4.3	0.7	6.58	43.7	149.3	7.4	0.412371134	0.460829493	2.322580645
1517	0	577	1	5	M	77	9	1	9.31	3.73	10.9	96	295	0.01	7.29	1.06	0.75	0.15	0.06	12.3	0.13	0.0228	24.4	4.480043443	1.5	-3.8	1.9	13.22	49.8	152.3	26.4	1.843971631	17.9245283	6.877358491
1518	0	577	0	7	M	77	11	1	13.01	3.68	10.9	98.6	297	0.23	10.88	0.77	1.14	0.08	0.14	100.0	0.77	0.0379	25.6	5.73012939	1.3	-2.2	2.5	17.02	49.4	151.2	15.6	1.714285714	7.792207792	14.12987013
1519	0	577	0	10	M	77	14	1	19.27	3.69	10.8	94.9	390	0.68	15.45	1.65	2.03	0.04	0.1	24.8	0.41	0.0631	25.8	5.055263635	2.3	-3.3	1.2	19.72	49.6	156.3	10.3	0.430802369	3.03030303	9.363636364
1520	0	578	1	4	F	42	12	0	4.29	4.08	10.7	81.9	366	0.01	2.87	1.01	0.38	0.01	0.02	6.9	0.07	0.0216	27.4	8.326645265	5.7	0.2	0.8	30.48	50.1	151		5.780346821	18.81188119	2.841584158
1521	0	579	1	5	M	56	6	0	5.51	3.62	11	91.7	160	0	4.09	0.85	0.51	0.05	0.01	4.7	0.04	0.0416	31.3	11.83374083	1.4	0.7	0.2	18.93	50.3	150.7	15.3	1.012145749	2.352941176	4.811764706
1522	0	579	0	9	M	56	10	0	5.17	3.75	11.3	91.7	203	0	3.44	1.05	0.65	0.01	0.02	4.8	0.05	0.0379	29.4	9.106830123	1.3	-1	0.3	18.49	48.9	146		1.546391753	6.666666667	3.276190476
1523	0	579	0	11	M	56	12	0	6.02	3.58	10.8	88	245	0	4.36	1.03	0.62	0	0.01	4.9	0.05	0.024	30.2	9.884428224	1.8	-0.4	0.3	24.22	48.3	146.5	15.5	1.247771836	11.65048544	4.233009709
1524	0	579	0	13	M	56	14	0	6.76	3.57	10.7	90.5	259	0	4.71	1.27	0.74	0	0.04	10.2	0.13	0.0321	30.7	9.102937285	1.5	0	0.4	23.58	49.2	147.6		4.054054054	12.5984252	3.708661417
1525	0	579	0	16	M	56	17	0	7.17	3.3	9.8	90.9	293	0	4.84	1.43	0.75	0.13	0.02	5.6	0.08	0.035	31.5	8.027522936	1.4	1.3	0.4	23.52	48.9	148.7	15.4	1.44092219	4.195804196	3.384615385
1526	0	580	1	0	M	86	7	1	5.76	4.14	13.1	99.8	157	0	3.96	1.16	0.61	0.02	0.01	1.7	0.02				0.4				43.3	158.8	4.3	1.651376147	0	3.413793103
1527	0	580	0	5	M	86	12	1	8.81	3.81	11.8	103.4	222	0.01	7.7	0.79	0.29	0.02	0.01	10.1	0.08	0.0236	25.3	4.720087816	0.4	-5.4	1.4	10.48	53	152.3	13.9	5.019305019	1.265822785	9.746835443
1528	0	581	1	2	M	78	9	1	6.81	4.32	12.9	90.5	173	0	5.47	0.76	0.56	0	0.02	2.6	0.02	0.0441	31	2.007374027	1.4	0.7	0.2	3.47	47.1	151.9	6.6	0.587084149	1.315789474	7.197368421
1529	0	581	0	4	M	78	11	1	10.93	4.15	12.4	92.8	193	0	9.74	0.68	0.49	0	0.02	14.7	0.1	0.0361	28.7	2.771084337	1.2	-2	0.1	5.35	50.1	151.4	7.4	3.340757238	1.470588235	14.32352941
1530	0	581	0	7	M	78	14	1	6.78	3.83	11.5	96.6	192	0	5.72	0.52	0.23	0.29	0.02	15.4	0.08	0.0195	22.1	2.31741573	1.1	-6.5	2.4	4.45	54.8	152.2		10.14492754	3.846153846	11
1531	0	581	0	9	M	78	16	1	7.16	3.63	10.8	99.7	200	0.01	5.91	0.41	0.52	0.29	0.03	34.1	0.14	0.0098	24.3	2.853351029	1	-3.5	3.4	5.71	55	151.6	19.5	2.697095436	2.43902439	14.41463415
1532	0	581	0	11	M	78	18	1	5.92	3.31	9.9	100.6	206	0	4.91	0.3	0.45	0.22	0.04	26.7	0.08	0.0086	21	2.480462113	1	-5.5	5	5.11	56.5	153.3	33.3	1.609195402	6.666666667	16.36666667
1533	0	581	0	14	M	78	21	1	9.12	3.24	9.6	101.2	266	0	7.79	0.48	0.62	0.2	0.03	18.8	0.09	0.0275	21	3.633986928	0.7	-5	5.5	9.67	51.6	154.7	18.8	0.527240773	2.083333333	16.22916667
1534	0	582	1	1	F	77	14	1	12.24	4.42	14	94.3	264	0.01	10.07	1.42	0.68	0.03	0.04	3.5	0.05				0.5				45.9	152.8	3.5	0.668896321	0	7.091549296
1535	0	582	0	3	F	77	16	1	8.9	4.23	13.4	99.1	193	0	7.41	0.66	0.78	0.02	0.03	6.1	0.04				0.4				44.5	156.6	0	0.564174894	0	11.22727273
1536	0	582	0	4	F	77	17	1	6.17	3.79	12.3	95.3	155	0	4.72	0.77	0.67	0	0.01	2.6	0.02				0.5				49.8	155.7	5.2	1.839464883	1.298701299	6.12987013
1537	0	582	0	6	F	77	19	1	4.81	4.04	12.8	93.3	153	0	3.85	0.48	0.47	0	0.01	4.2	0.02	0.0222	30.8	2.587380844	0.6	-0.9	0.2	3.96	52.2	157.4	6.3	0.925925926	2.083333333	8.020833333
1538	0	582	0	8	F	77	21	1	9.11	3.77	11.9	91.5	149	0	7.89	0.51	0.7	0	0.01	13.7	0.07	0.0173	31.6	3.497843795	0.8	0.1	0.2	5.21	57.8	156.7	21.6	5.572289157	11.76470588	15.47058824
1539	0	583	1	1	F	66	3	1	3.66	5.46	14.2	83.5	156	0	2.52	0.92	0.19	0.01	0.02	1.1	0.01				9				44.1	153.3		3.76344086	3.260869565	2.739130435
1540	0	583	0	2	F	66	4	1	4.39	5.66	14.6	81.4	165	0.01	3.71	0.52	0.13	0.01	0.02	5.8	0.03				10.7				48.5	151.4		21.66666667	7.692307692	7.134615385
1541	0	583	0	3	F	66	5	1	6.53	5.3	13.7	85.5	182	0	5.8	0.54	0.17	0	0.02	11.1	0.06	0.027	26.6	6.983471074	7.5	0.4	1.7	12.71	47.7	148		16.44736842	14.81481481	10.74074074
1542	0	583	0	5	F	66	7	1	6.12	4.55	11.6	86.2	262	0.01	4.72	0.9	0.39	0.1	0.01	12.2	0.11	0.0155	26.7	4.048054322	7.7	1.1	3.7	10.61	49.6	147.9	13.3	5.555555556	10	5.244444444
1543	0	583	0	8	F	66	10	1	6.6	4.16	10.7	90.1	332	0.05	5.29	0.58	0.54	0.15	0.04	65.5	0.38	0.0196	23.3	3.930753564	5.8	-1.6	4.7	13.05	53.5	150.2	19	3.515625	5.172413793	9.120689655
1544	0	583	0	10	F	66	12	1	9.27	4.26	11	89.2	407	0.04	7.68	0.63	0.77	0.14	0.05	74.6	0.47	0.049	22.9	3.631151457	5.7	-1.8	5	14.78	51.3	151.7	14.3	1.136363636	3.174603175	12.19047619
1545	0	583	0	10	F	66	12	1	7.94	3.96	10.2	88.1	375	0.06	6.03	1.05	0.68	0.14	0.04	30.5	0.32	0.0546	22.4	3.615370055	5.9	-2.3	4.8	13.56	49.3	151.6	17.1	1.794453507	3.80952381	5.742857143
1546	0	583	0	12	F	66	14	1	6.89	4.03	10.2	90.3	387	0.04	5.29	0.73	0.68	0.16	0.03	28.8	0.21	0.0919	23.6	3.450154349	5.2	-0.9	5.5	13.35	49.8	150.9	21.9	0.802568218	2.739726027	7.246575342
1547	0	583	0	15	F	66	17	1	9.47	4.21	10.8	96.7	466	0.03	7.88	0.58	0.92	0.04	0.05	34.5	0.2	0.12	23.6	1.896352056	3.1	0	9.3	8.84	47.7	154.9	25.9	0.470588235	6.896551724	13.5862069
1548	0	584	1	1	F	46	7	0	4.16	4.3	13	92.8	145	0	3.02	0.74	0.39	0	0.01	1.4	0.01				0.6				47.2	160.1	6.8	0.552486188	2.702702703	4.081081081
1549	0	584	0	6	F	46	12	0	6.66	3.5	11	93.1	236	0	5.1	0.99	0.48	0.07	0.02	9.1	0.09	0.028	27.2	4.08814149	0.8	-3.8	0.2	9.65	50.1	158.5	13.1	2.444444444	5.050505051	5.151515152
1550	0	584	0	9	F	46	15	0	6.07	4.02	12.4	94.3	299	0	3.98	1.4	0.48	0.17	0.04	8.6	0.12	0.0503	29.9	2.268835616	0.6	-1	0.3	6.78	49.6	157.8	18.6	2.905569007	5.714285714	2.842857143
1551	0	584	0	13	F	46	19	0	8.29	4.38	13.3	93.8	323	0	5.35	2.28	0.49	0.12	0.05	5.7	0.13	0.1012	35.2	2.503542749	0.7	5.2	0.7	8.09	49.3	161.8	13.2	1.333333333	1.754385965	2.346491228
1552	0	585	1	1	M	90	7	0	4.75	3.86	11.4	87	130	0	3.36	0.84	0.52	0.02	0.01	3.6	0.03	0.0293	27.4	9.863945578	2	-2.5	0.3	12.82	47.8	154	6	0.63559322	2.380952381	4
1553	0	585	0	3	M	90	9	0	7.38	4.13	12.5	86.9	176	0	6.28	0.86	0.22	0.01	0.01	5.8	0.05	0.0322	28.2	6.706586826	2.2	-2	0.3	11.80	49.7	153.5	4.7	5.445544554	2.325581395	7.302325581
1554	0	585	0	5	M	90	11	0	8.55	3.88	12	89.2	230	0.01	7	1.22	0.3	0.02	0.01	10.7	0.13	0.0365	31.3	6.572481572	2.3	1.6	0.3	15.12	51.8	154.3	8.2	4.577464789	3.278688525	5.737704918
1555	0	586	1	0	F	82	2	0	6.64	3.55	11	95.8	185	0	4.07	1.93	0.62	0	0.02	1.6	0.03				0.6				42.2	152	4.1	1.063829787	0.518134715	2.10880829
1556	0	586	0	2	F	82	4	0	6.25	3.81	11.9	94.2	201	0	4.22	1.55	0.47	0	0.01	1.9	0.03	0.0381	30.5	1.611820013	0.7	-0.9	0.1	3.24	44.2	151.1	3.9	1.612903226	1.290322581	2.722580645
1557	0	587	1	0	F	67	10	1	4.4	4.48	14.3	95.1	97	0	3.58	0.54	0.27	0.01	0	5.6	0.03				0.7				47.5	147.3	9.3	1.680672269	3.703703704	6.62962963
1558	0	587	0	2	F	67	12	1	4.29	3.81	12.1	96.6	96	0	3.65	0.29	0.33	0.01	0.01	10.3	0.03	0.0335	34.5	12.54996003	0.5	2.2	0.1	12.05	50.6	148.6	17.2	2.215189873	3.448275862	12.5862069
1559	0	587	0	4	F	67	14	1	5.72	3.69	11.9	95.9	134	0	4.98	0.33	0.38	0.03	0	15.2	0.05	0.0424	33.5	13.52549889	0.6	1	0.1	18.12	44.1	144.7	12.1	0.573065903	3.03030303	15.09090909
1560	0	587	0	5	F	67	15	1	6.64	3.9	12.6	98.7	140	0	5.94	0.33	0.35	0.01	0.01	21.2	0.07	0.0503	32.2	7.974137931	0.4	0	0.1	11.16	48.6	149	18.2	2.352941176	3.03030303	18
1561	0	587	0	7	F	67	17	1	8.22	3.57	11.3	102.8	150	0	7.28	0.44	0.47	0.02	0.01	13.6	0.06	0.0439	31.3	5.164930556	0.4	-0.2	0.3	7.75	47.1	152	15.9	0.471698113	4.545454545	16.54545455
1562	0	587	0	9	F	67	19	1	6.58	3.61	11.7	103.6	131	0.01	5.77	0.26	0.53	0.01	0.01	11.5	0.03	0.0379	32	5.72666025	0.3	0.4	0.3	7.50	47.5	154.3	11.5	0.410677618	3.846153846	22.19230769
1563	0	587	0	12	F	67	22	1	4.31	3.39	10.9	103.5	109	0.01	3.51	0.28	0.46	0.05	0.01	17.9	0.05	0.0909	34.5	8.219178082	0.2	3.4	0.5	8.96	51.9	154.2	25	2.816901408	3.571428571	12.53571429
1564	0	588	1	1	F	81	11	0	7.26	3.58	11.2	91.3	271	0	5.92	0.68	0.59	0.04	0.03	30.9	0.21	0.0218	33.7	2.885032538	1.1	2.2	0.1	7.82	46	153.2	14.7	2.226345083	11.76470588	8.705882353
1565	0	588	0	3	F	81	13	0	5.89	3.81	12.1	91.9	379	0	3.96	1.06	0.65	0.17	0.05	16.0	0.17	0.0297	33.7	3.454151177	1	1.9	0.2	13.09	44.4	149.6	13.2	1.192504259	6.603773585	3.735849057
1566	0	589	1	1	F	74	9	0	4.43	4.32	13.2	88.9	214	0	3.23	0.75	0.45	0	0	1.3	0.01	0.0164	30.3	2.384737679	1	-0.7	0.5	5.10	45.1	149.2	9.3	1.813471503	5.333333333	4.306666667
1567	0	589	0	3	F	74	11	0	4.34	4.44	13.4	91.7	279	0	3.18	0.76	0.39	0.01	0	3.9	0.03	0.0258	31.4	2.803976549	0.8	0.6	0.5	7.82	48.5	145.6	13.2	1.652892562	6.578947368	4.184210526
1568	0	590	1	1	F	76	4	0	5.52	3.73	13.4	101.9	212	0	3.39	1.12	0.9	0.08	0.03	1.8	0.02				0.1				46.7	151.8	4.5	2.592592593	0	3.026785714
1569	0	590	0	2	F	76	5	0	4.24	3.75	13.4	101.9	215	0	2.3	0.92	0.96	0.04	0.02	1.1	0.01				0.2				46.9	150.7	6.5	0.669642857	1.086956522	2.5
1570	0	590	0	5	F	76	8	0	5.86	3.76	13.2	100.8	224	0	3.63	1.04	1.11	0.05	0.03	3.8	0.04				0.1				51.4	149.4	11.5	0.601805416	1.923076923	3.490384615
1571	0	590	0	7	F	76	10	0	4.37	3.78	13.3	102.1	197	0	2.71	0.83	0.8	0.01	0.02	4.8	0.04	0.0284	35.8	4.078659869	0.2	1	0.05	8.03	53.8	149.2	15.7	1.864181092	2.409638554	3.265060241
1572	0	591	1	0	M	53	9	0	6.85	4.71	13.6	83.9	158	0	5.16	1.07	0.61	0.01	0	3.7	0.04				2.2				47.4	152.8		2.977232925	2.803738318	4.822429907
1573	0	591	0	1	M	53	10	0	6.95	4.75	13.8	85.9	164	0	5.38	1.06	0.5	0	0.01	4.7	0.05				1.7				44.5	153.3	5.7	1.83908046	1.886792453	5.075471698
1574	0	591	0	2	M	53	11	0	8.2	4.61	13.3	85.2	201	0	6.82	0.84	0.51	0.02	0.01	6.0	0.05	0.0309	27	5.873550318	1.9	-2.5	0.6	11.81	48.6	153.4	11.9	2.603036876	7.142857143	8.119047619
1575	0	591	0	4	M	53	13	0	8.55	4.6	13.5	84.6	275	0	6.3	1.31	0.81	0.08	0.05	20.6	0.27	0.0386	28.3	5.485345523	2.1	-1.1	0.6	15.08	47.7	151.3	16.8	1.265822785	9.923664122	4.809160305
1576	0	592	1	0	M	68	6	0	2.43	5.43	15.4	85.5	117	0	1.67	0.51	0.25	0	0	2.0	0.01				2.5				50.4	159.4	11.8	1.709401709	1.960784314	3.274509804
1577	0	592	0	5	M	68	11	0	6.45	5.35	15.2	85.6	183	0	5.74	0.38	0.33	0	0	13.2	0.05	0.0321	31.2	3.298296484	2.8	1.9	0.2	6.04	47.5	156.4	13.2	1.941747573	7.894736842	15.10526316
1578	0	592	0	7	M	68	13	0	5.01	4.97	14.2	85.5	220	0	4.29	0.35	0.37	0	0	8.6	0.03	0.0239	31.9	2.459508098	2.6	2.5	0.2	5.41	48.7	156.6	5.7	4.21686747	2.857142857	12.25714286
1579	0	592	0	9	M	68	15	0	7.32	4.94	13.9	87	308	0	6.26	0.46	0.57	0.02	0.01	13.0	0.06	0.0351	32.3	1.727619475	2.3	3.1	0.2	5.32	50.3	154.9	19.6	0.763358779	8.695652174	13.60869565
1580	0	592	0	11	M	68	17	0	6.92	4.98	14.1	86.5	368	0	5.79	0.5	0.55	0.07	0.01	24.0	0.12	0.0403	33.4	1.25355173	2.3	3.7	0.2	4.61	49.2	155.8	12	0.982318271	2	11.58
1581	0	593	1	0	M	77	1	0	7.34	5.53	15.3	81.2	229	0	5.16	1.22	0.93	0	0.03	1.6	0.02				5.9				45.1	161.1	2.5	0.23255814	0	4.229508197
1582	0	593	0	3	M	77	4	0	6.21	4.69	12.7	84.9	190	0	4.55	1.04	0.6	0.01	0.01	1.9	0.02	0.0324	26.5	3.981164384	3.9	-1.1	0.3	7.56	49.9	159.5	5.8	1.565217391	0	4.375
1583	0	594	1	1	M	74	1	1	3.85	4.05	13.4	97.3	93	0	2.59	0.75	0.5	0	0.01	5.3	0.04	0.0409	36.2	6.621004566	0.6	3	0.1	6.16	49.2	159.5		14.34689507	4	3.453333333
1584	0	594	0	2	M	74	2	1	3.61	4.28	14.2	95.8	97	0	2.43	0.77	0.4	0	0.01	6.5	0.05	0.0402	36.4	5.818965517	0.7	3.1	0.05	5.64	50	158.8		10.82621083	2.597402597	3.155844156
1585	0	594	0	5	M	74	5	1	4.76	4.07	13.5	96.6	155	0.01	3.76	0.69	0.3	0	0.01	15.9	0.11	0.0464	36.5	4.995004995	0.8	3.2	0.1	7.74	48.3	154.9		19.78417266	4.347826087	5.449275362
1586	0	594	0	5	M	74	5	1	5	4.23	13.8	96.7	168	0	3.88	0.8	0.31	0	0.01	10.0	0.08	0.047	36.5	4.8676345	0.8	3.3	0.1	8.18	47.8	155.8	11.3	5.653710247	7.5	4.85
1587	0	594	0	7	M	74	7	1	7.12	3.82	12.7	96.1	189	0	6.4	0.56	0.13	0.01	0.02	26.8	0.15	0.0401	35.1	5.890856523	0.8	1.8	0.1	11.13	50.6	154		24.10714286	7.142857143	11.42857143
1588	0	594	0	9	M	74	9	1	4.5	3.89	12.8	104.1	134	0.02	3.46	0.69	0.15	0.18	0.02	8.7	0.06	0.0397	34	4.504021448	0.5	1.2	0.1	6.04	66.7	156.8		32.43243243	7.246376812	5.014492754
1589	0	594	0	12	M	74	12	1	3.24	3.92	13.1	101.8	31	0.01	2.42	0.43	0.21	0.14	0.04	30.2	0.13	0.0557	37.4	12.76595745	0.7	4.3	0.1	3.96	72.1	157.4		26.28865979	0	5.627906977
1590	0	595	1	0	M	81	6	0	4.79	5.11	13.9	85.5	150	0	2.98	1.17	0.61	0.02	0.01	1.7	0.02				3.9				43.7	152.2	3.4	0.547445255	1.709401709	2.547008547
1591	0	595	0	2	M	81	8	0	5.9	5.08	13.5	85.6	193	0	4.41	1.03	0.43	0.02	0.01	3.9	0.04	0.0381	26	10.70853462	4	-1	1.1	20.67	50	148.5	4.9	4.11311054	1.941747573	4.281553398
1592	0	596	1	0	M	79	1	0	3.1	3.1	11.1	106.8	157	0	2.04	0.36	0.69	0	0.01	38.9	0.14				0.4				38.3	140.7	11.1	0.793650794	0	5.666666667
1593	0	596	0	8	M	79	9	0	3.19	3.32	12	109	225	0.01	1.52	0.29	1.34	0.01	0.03	113.8	0.33				0.4				42.4	144.8	6.9	0.910596026	0	5.24137931
1594	0	596	0	9	M	79	10	0	4	3.28	11.7	109.1	208	0	2.67	0.37	0.95	0	0.01	51.4	0.19	0.0384	32.6	2.156500308	0.4	-2.2	0.4	4.49	42.1	139.2	18.9	1.406799531	2.702702703	7.216216216
1595	0	597	1	0	F	85	10	1	6.69	4.31	13.1	89.8	211	0	5.1	1.08	0.49	0	0.02	8.3	0.09				1.2				44.7	152.5		3.579418345	12.03703704	4.722222222
1596	0	597	0	2	F	85	12	1	8.29	3.8	11.6	91.1	248	0	7.01	0.78	0.45	0.03	0.02	15.4	0.12	0.0312	27.3	4.265264388	0.9	-3.6	0.4	10.58	47.7	149.7	15.4	3.836317136	8.974358974	8.987179487
1597	0	598	1	0	F	83	7	0	6.43	4.65	13.9	92.5	224	0	5.06	0.82	0.52	0.01	0.02	2.4	0.02				1.2				43.6	145.4	7.3	0.883002208	4.87804878	6.170731707
1598	0	598	0	2	F	83	9	0	4.25	4.72	14	92.8	266	0	3.07	0.79	0.34	0.04	0.01	3.8	0.03	0.0316	30.3	2.795588612	1.1	0	0.5	7.44	46.7	143.4	7.6	1.98019802	2.53164557	3.886075949
1599	0	599	1	0	F	69	11	0	8.59	4.89	14.2	84	384	0	7.63	0.67	0.26	0.01	0.02	6.0	0.04				2.8				50.5	152.8		3.017241379	10.44776119	11.3880597
1600	0	599	0	1	F	69	12	0	7.63	4.17	12	85.6	375	0	6.66	0.58	0.37	0.01	0.01	12.1	0.07	0.0317	28	2.516748144	2.1	-1.4	0.2	9.44	55.5	152.9	17.2	6.547619048	12.06896552	11.48275862
1601	0	599	0	2	F	69	13	0	6.69	4.11	11.6	87.1	448	0	5.63	0.75	0.21	0.08	0.02	13.3	0.1	0.0312	28.1	2.633190447	1.8	-1.3	0.3	11.80	56.9	152.6		6.315789474	14.66666667	7.506666667
1602	0	599	0	4	F	69	15	0	7.38	4.05	11.7	86.9	537	0	6.05	0.74	0.49	0.08	0.02	9.5	0.07	0.0304	27.8	1.803164262	1.9	-1.3	0.5	9.68	52.1	154.5	14.9	1.395348837	9.459459459	8.175675676
1603	0	599	0	6	F	69	17	0	7.25	4.36	12.5	86.7	669	0	5.45	1.03	0.58	0.15	0.04	3.9	0.04	0.0467	28.4	1.434559851	1.8	-0.7	0.4	9.60	49.2	157.1	11.7	1.346153846	4.854368932	5.291262136
1604	0	599	0	8	F	69	19	0	6.02	4.39	12.4	89.5	725	0	3.97	1.35	0.49	0.15	0.06	2.2	0.03	0.0724	30.6	0.904331271	1.4	2	0.5	6.56	50.4	158.1	11.9	0.865800866	3.703703704	2.940740741
1605	0	599	0	9	F	69	20	0	6.18	4.19	11.8	89.7	683	0	4.16	1.3	0.47	0.19	0.06	3.8	0.05	0.0742	32.7	0.977421562	1.3	4.3	0.8	6.68	49.8	158.4	12.3	1.559020045	3.076923077	3.2
1606	0	599	0	11	F	69	22	0	6.3	4.45	12.5	89.2	656	0	4.02	1.48	0.56	0.16	0.08	2.0	0.03	0.0748	34.6	0.956109998	1.4	5.7	0.8	6.27	47.4	160.2	10.8	0.967117988	2.027027027	2.716216216
1607	0	600	1	0	F	68	14	0	5.03	4.18	13.1	96.7	212	0	4.31	0.41	0.3	0	0.01	7.3	0.03				0.7				51.9	159.8	14.6	0.73800738	4.87804878	10.51219512
1608	0	600	0	1	F	68	15	0	3.7	3.93	12.5	95.9	214	0	3.14	0.34	0.22	0	0	5.9	0.02	0.0338	30.4	2.104591837	0.9	-1.4	0.4	4.50	52.3	159.5	14.7	1.477832512	5.882352941	9.235294118
1609	0	600	0	3	F	68	17	0	5.16	3.79	11.9	96	217	0.01	3.91	0.67	0.55	0.01	0.02	9.0	0.06	0.0421	31.3	2.04141149	0.8	-0.3	0.6	4.43	53.8	157.6	13.4	1.535508637	2.985074627	5.835820896
1610	0	601	1	0	F	42	14	0	3.56	4.27	11.9	83.1	145	0	2.93	0.52	0.11	0	0	1.9	0.01				2.8				50.3	159.4		3.06122449	7.692307692	5.634615385
1611	0	601	0	2	F	42	16	0	4.1	3.77	10.5	85.9	174	0	3.52	0.48	0.09	0	0.01	8.3	0.04	0.0181	25.3	6.840958606	2	-2.6	1.3	11.90	55.4	155.6		30	4.166666667	7.333333333
1612	0	601	0	4	F	42	18	0	2.64	3.88	10.6	86.3	246	0	1.56	0.84	0.23	0	0.01	2.4	0.02	0.0151	26.1	6.273644388	1.9	-1.9	1.3	15.43	50.4	153.9		3.51758794	2.380952381	1.857142857
1613	0	602	1	1	M	69	29	0	6.39	3.98	11.4	91.2	254	0	4.99	0.71	0.67	0.01	0.01	9.9	0.07	0.0247	27.6	5.940883816	1.3	-1.8	0.5	15.09	50.6	147.7	16.9	3.715670436	5.633802817	7.028169014
1614	0	602	0	3	M	69	31	0	4.33	3.39	9.6	90.6	275	0.01	3.14	0.56	0.61	0.01	0.01	14.3	0.08	0.0254	28.4	6.89373297	1.6	-0.8	0.5	18.96	52.9	150.3	30.4	3.411131059	14.28571429	5.607142857
1615	0	602	0	4	M	69	32	0	5.36	3.76	10.7	90.4	331	0.01	4.22	0.53	0.57	0.03	0.01	18.9	0.1	0.038	28.7	5.812188245	1.5	-0.7	0.4	19.24	51.1	148.2	17	1.134215501	3.773584906	7.962264151
1616	0	602	0	6	M	69	34	0	5.69	3.54	10.2	89	247	0.02	4.11	0.77	0.76	0.03	0.02	46.8	0.36	0.0527	23.7	4.695748819	1.6	-5.3	0.7	11.60	52.7	154.2	16.9	0.709219858	1.298701299	5.337662338
1617	0	602	0	8	M	69	36	0	7.47	3.66	10.5	89.3	200	0	5.69	0.81	0.91	0.03	0.03	45.7	0.37	0.0527	23.9	5.187220886	1.6	-4.9	1.1	10.37	57.4	157.5	23.5	1.239157373	1.234567901	7.024691358
1618	0	602	0	10	M	69	38	0	9.06	3.61	10.5	89.2	189	0	6.94	1.13	0.91	0.03	0.05	27.4	0.31	0.0736	26	4.515908313	1.7	-2.5	1.3	8.54	53.1	159.2	22.1	0.589622642	1.769911504	6.14159292
1619	0	603	1	2	M	47	8	1	3.16	4.54	14.5	92.5	106	0	2.25	0.78	0.12	0	0.01	2.6	0.02	0.03	28.6	5.263157895	0.7	-3.3	0.2	5.58	51.4	158.7		14.28571429	2.564102564	2.884615385
1620	0	603	0	4	M	47	10	1	3.64	3.92	12.7	95.9	172	0.01	2.33	1.1	0.18	0.01	0.02	6.4	0.07	0.0243	29.1	5.017779534	0.6	-2.7	0.3	8.63	56.4	155.1		18.02325581	4.545454545	2.118181818
1621	0	603	0	6	M	47	12	1	5.27	3.61	11.5	96.7	247	0.01	4.06	0.84	0.32	0.03	0.02	27.4	0.23	0.0224	27	4.944343774	0.8	-4.5	1.1	12.21	54.1	156.2		14.04109589	19.04761905	4.833333333
1622	0	603	0	7	M	47	13	1	5.8	3.9	12.5	97.9	285	0.01	4.9	0.4	0.34	0.12	0.04	50.0	0.2	0.0386	28.8	5.910970567	0.7	-3.2	0.3	16.85	53.2	155.5	15	4.402515723	10	12.25
1623	0	603	0	8	M	47	14	1	5.58	3.77	12.1	97.1	288	0.02	4.37	0.63	0.38	0.13	0.07	65.1	0.41	0.0418	26.1	5.770114943	0.7	-5.4	1	16.62	50.5	156.1		10.16949153	6.349206349	6.936507937
1624	0	603	0	9	M	47	15	1	5.77	3.56	11.5	96.3	291	0.06	4.21	1	0.35	0.12	0.09	70.0	0.7	0.0559	29.8	6.349206349	1	-2.1	0.8	18.48	48.1	155	19	4.347826087	5	4.21
1625	0	603	0	10	M	47	16	1	7.7	3.49	11.1	98.3	343	0.09	5.86	0.9	0.68	0.11	0.15	100.0	0.9	0.0715	32.2	3.723691311	0.6	0.2	0.7	12.77	49.1	156.7	15.6	1.907790143	5.555555556	6.511111111
1626	0	603	0	11	M	47	17	1	6.91	3.38	11	97.6	348	0.09	4.85	1.13	0.63	0.16	0.14	103.5	1.17	0.0919	33.5	3.727820283	0.8	1.5	0.4	12.97	48.6	156.5	12.4	1.223776224	3.539823009	4.292035398
1627	0	604	1	0	M	65	7	1	6.58	5.08	15.3	91.9	236	0	5.78	0.62	0.18	0	0	6.5	0.04				0.8				48.2	152.5		8.333333333	8.064516129	9.322580645
1628	0	604	0	3	M	65	10	1	4.22	3.97	12.2	97.7	299	0	3	0.82	0.35	0.04	0.01	3.7	0.03	0.0341	28.4	3.84886177	0.6	-2.2	0.5	11.51	48.7	148		0.9375	3.658536585	3.658536585
1629	0	604	0	5	M	65	12	1	5.38	3.73	11.4	98.7	295	0	3.9	0.97	0.39	0.11	0.01	7.2	0.07	0.0425	26.8	3.718199609	0.6	-3.3	1.3	10.97	48.5	147.1	10.3	2.770083102	2.06185567	4.020618557
1630	0	604	0	7	M	65	14	1	5.32	3.72	11.2	96.5	326	0	3.76	0.86	0.6	0.08	0.02	5.8	0.05	0.0539	27.2	3.540535104	0.6	-3.3	1.1	11.54	47.6	149.1	11.6	0.553505535	2.325581395	4.372093023
1631	0	605	1	1	M	76	6	1	3.44	3.62	11.3	92.8	180	0.01								0.0174	31	3.384615385	0.6	-0.4	0.2	6.09
1632	0	605	0	4	M	76	9	1	3.36	3.57	11.2	91.3	141	0	2.36	0.86	0.12	0.01	0.01	2.3	0.02				1.1				50.2	152.6	3.5	2.702702703	1.162790698	2.744186047
1633	0	605	0	7	M	76	12	1	4.32	2.44	7.7	100	212	0	3.68	0.48	0.14	0.01	0.01	8.3	0.04	0.0115	28.1	3.711463634	0.5	-3	0.4	7.87	57.5	153.8		8.396946565	8.333333333	7.666666667
1634	0	605	0	9	M	76	14	1	7.49	4.14	12.8	91.3	430	0.01	6.19	0.8	0.4	0.08	0.02	15.0	0.12	0.0224	27	3.596127248	1.3	-3.7	0.8	15.46	58.8	153.5	10	1.351351351	6.25	7.7375
1635	0	606	1	1	F	78	8	0	4	4.31	13.2	89.6	209	0.01	3.08	0.49	0.41	0.01	0.01	6.1	0.03	0.0254	31.1	3.456790123	1.7	0	0.1	7.22	45.3	157.6	6.1	0.828729282	4.081632653	6.285714286
1636	0	606	0	2	F	78	9	0	4.06	4.62	13.8	93.7	187	0	3.25	0.35	0.45	0	0.01	11.4	0.04	0.0305	31	4.015636105	1.3	0.3	0.2	7.51	46.6	153.9	11.4	0.248756219	2.857142857	9.285714286
1637	0	607	1	0	M	70	4	0	3.26	4.46	12.8	85.2	201	0	2.44	0.6	0.21	0	0.01	5.0	0.03	0.0227	30.1	3.198127925	2.5	1	0.2	6.43	46.7	150		8.717948718	1.666666667	4.066666667
1638	0	607	0	1	M	70	5	0	2.88	4.01	11.8	85.3	180	0	2.1	0.57	0.19	0.01	0.01	3.5	0.02	0.0192	30.7	3.828355069	2.7	1.2	0.2	6.89	45.4	152.6	7	2.298850575	1.754385965	3.684210526
1639	0	607	0	2	M	70	6	0	3.58	3.76	11.1	84.3	181	0	2.68	0.7	0.19	0	0.01	2.9	0.02	0.015	29.9	3.041682313	3	0.2	0.1	5.51	45.8	149.5		4.705882353	2.857142857	3.828571429
1640	0	607	0	4	M	70	8	0	5	4.26	12	83.8	225	0	4.04	0.73	0.22	0.01	0	6.8	0.05				3.2				45.3	143.4	8.2	0.510204082	0	5.534246575
1641	0	607	0	6	M	70	10	0	5.97	4.02	11.4	84.8	275	0.01	4.73	0.85	0.21	0.16	0.02	12.9	0.11	0.0269	30.9	3.74089882	2.5	1.1	0.2	10.29	47.3	147.6		2.06185567	7.058823529	5.564705882
1642	0	607	0	8	M	70	12	0	6.54	3.93	11.4	85.8	330	0	4.71	1.26	0.36	0.18	0.03	18.3	0.23	0.0432	31.6	3.32046332	2.3	2	0.3	10.96	45.6	145.5	19	4.62962963	5.555555556	3.738095238
1643	0	608	1	0	M	73	5	1	8.45	5.25	16.4	88.8	165	0	7.49	0.42	0.52	0	0.02	2.4	0.01	0.0252	30.8	4.378593543	1.2	-1.3	0.1	7.22	49	158.2	4.8	4.4397463	0	17.83333333
1644	0	608	0	2	M	73	7	1	7.75	5.6	17.7	89.3	195	0	7.03	0.42	0.29	0	0.01	14.3	0.06	0.0269	30.1	4.788069074	1.2	-2	0.1	9.34	52.4	158.1	2.4	5.533596838	0	16.73809524
1645	0	608	0	4	M	73	9	1	10.64	5.62	17.5	88.4	251	0	10.13	0.27	0.21	0	0.03	44.4	0.12	0.0191	32.5	3.767958796	1.4	0.5	0.2	9.46	54.2	154.5	7.4	1.587301587	3.703703704	37.51851852
1646	0	609	1	0	F	70	14	1	11.49	4.4	12.5	88	246	0.01	10.04	0.81	0.62	0	0.02	21.0	0.17				2.7				49.9	154	25.9	3.652173913	13.58024691	12.39506173
1647	0	609	0	1	F	70	15	1	13.57	4.23	11.9	90.3	207	0.01	11.44	1.17	0.85	0.06	0.05	20.5	0.24	0.0241	25.4	9.385219097	2.1	-3.1	1.3	19.43	49.1	152.1	22.2	1.65184244	10.25641026	9.777777778
1648	0	609	0	3	F	70	17	1	12.32	4.66	13.3	89.7	120	0.01	11.14	0.78	0.21	0.14	0.05	56.4	0.44	0.0382	25.9	12.08010336	2.3	-3.1	0.9	14.50	51.6	151.7	19.2	3.571428571	5.128205128	14.28205128
1649	0	609	0	5	F	70	19	1	14.72	4.02	11.4	91	78	0	13.57	0.46	0.54	0.1	0.05	141.3	0.65	0.0289	24	11.95741196	1.9	-4.3	1.6	9.33	48.7	150.7	17.4	1.01010101	4.347826087	29.5
1650	0	609	0	5	F	70	19	1	15.76	4.27	12.2	90.4	97	0	14.42	0.63	0.54	0.12	0.05	111.1	0.7	0.0363	24.4	13.47414421	2.1	-4.4	1.2	13.07	49	149.2	17.5	0.610997963	4.761904762	22.88888889
1651	0	610	1	0	F	69	7	1	4.65	3.93	12	91.9	185	0	3.2	1.18	0.26	0	0.01	3.4	0.04				1.3				53.3	154.6		11.29707113	4.237288136	2.711864407
1652	0	610	0	2	F	69	9	1	4.71	3.44	10.6	95.1	197	0	3.46	1	0.24	0	0.01	5.0	0.05	0.021	29.1	3.720445063	0.9	-1.6	0.2	7.33	53.2	152.5		11.89427313	4	3.46
1653	0	610	0	4	F	69	11	1	8.02	3.82	11.9	91.1	303	0.03	6.64	0.88	0.49	0	0.01	29.5	0.26	0.0256	28.4	3.404735062	1.4	-2.8	0.1	10.32	53.9	152.5	15.9	5.909090909	9.090909091	7.545454545
1654	0	610	0	5	F	69	12	1	11.46	3.73	11.3	91.7	385	0	10.15	0.65	0.64	0	0.02	24.6	0.16	0.0246	28.4	3.213067672	1.3	-2.3	0.3	12.37	62.2	151	21.5	9.259259259	12.30769231	15.61538462
1655	0	610	0	7	F	69	14	1	18.57	3.54	10.7	99.2	298	0.02	15.9	0.93	1.67	0.03	0.04	44.1	0.41	0.0234	24	5.350398657	1	-6.2	1.4	15.94	67.1	151.1	25.8	1.393497014	12.90322581	17.09677419
1656	0	610	0	10	F	69	17	1	15.51	2.49	8.3	95.6	203	0.22	12.47	1.68	1.24	0.03	0.09	63.1	1.06	0.0249	24.7	6.149651621	1.5	-5.3	0.9	12.48	66.3	156	15.5	2.311643836	3.571428571	7.422619048
1657	0	611	1	0	F	82	14	0	5.49	3.6	11.5	101.1	168	0	3.89	0.98	0.61	0	0.01	2.0	0.02				0.2				50.3	155.1	5.1	3.467153285	2.040816327	3.969387755
1658	0	611	0	2	F	82	16	0	3.79	3.56	11.4	103.1	119	0	2.98	0.55	0.26	0	0	3.6	0.02	0.0253	27.6	7.966321244	0.3	-4	0.6	9.48	50.9	153.2	5.5	0.409836066	3.636363636	5.418181818
1659	0	612	1	0	F	64	9	0	6.99	4.62	14	89.6	189	0	5.22	0.91	0.84	0.01	0.01	4.4	0.04	0.0397	29.7	5.017234776	1	-1	0.1	9.48	49	146.3	7.7	2.781289507	4.395604396	5.736263736
1660	0	612	0	2	F	64	11	0	5.92	3.99	12	91.2	191	0	4.7	0.58	0.59	0.03	0.02	13.8	0.08	0.0327	29.4	4.700038212	0.7	-1.1	0.3	8.98	50.9	143.7	6.9	0.72859745	5.172413793	8.103448276
1661	0	612	0	4	F	64	13	0	5.89	4.34	13	89.4	286	0	4.51	0.59	0.63	0.14	0.02	15.3	0.09	0.0321	28.9	3.366583541	0.8	-1.6	0.3	9.63	49.1	144.1	13.6	1.030927835	3.389830508	7.644067797
1662	0	613	1	0	M	69	14	1	4.01	4.75	15.6	89.3	179	0	3.41	0.28	0.3	0	0.02	7.1	0.02				0.8				44.6	154.1	14.3	2.888086643	7.142857143	12.17857143
1663	0	613	0	1	M	69	15	1	5.05	4.24	13.9	90.8	186	0	4.85	0.1	0.09	0	0.01	30.0	0.03	0.0178	33.9	4.349442379	0.6	1.2	0.1	8.09	45.9	150.7	10	10.34482759	10	48.5
1664	0	613	0	6	M	69	20	1	5.1	4.69	15	96.6	277	0	4.88	0.12	0.08	0.01	0.01	50.0	0.06	0.0277	34.6	4.139376474	0.4	2	0.1	11.47	56.4	151.8	8.3	16.21621622	8.333333333	40.66666667
1665	0	613	0	9	M	69	23	1	8.68	3.68	12.2	106.8	210	0	8.09	0.22	0.31	0.03	0.03	40.9	0.09	0.0291	34.8	2.72812794	0.3	2.7	0.2	5.73	56.8	158.2	18.2	2.76816609	4.545454545	36.77272727
1666	0	614	1	0	F	62	5	0	18.51	3.95	12.4	90.6	271	0	15.68	1.34	1.36	0.05	0.08	43.3	0.58				1.3				48.1	146.5	18.7	1.559934319	6.71641791	11.70149254
1667	0	614	0	8	F	62	13	0	10.62	3.48	10.4	90.2	784	0	7.97	1.51	1	0.08	0.06	7.9	0.12	0.0477	27	1.761216166	1.6	-3.1	0.7	13.81	46.2	164.9	29.8	2.541436464	5.960264901	5.278145695
1668	0	614	0	10	F	62	15	0	6.56	3.32	9.8	94.6	683	0	4.81	1.08	0.54	0.11	0.02	2.8	0.03	0.0325	22.6	1.5746356	1.1	-5.9	3	10.75	44.7	163.4	22.2	2.419354839	5.555555556	4.453703704
1669	0	614	0	12	F	62	17	0	8.18	3.26	9.6	93.9	643	0	6.34	1.24	0.49	0.07	0.04	7.3	0.09	0.0186	25.5	1.506893235	1.5	-3.9	1.7	9.69	47.1	160.9	21.8	1.555555556	6.451612903	5.112903226
1670	0	614	0	14	F	62	19	0	6.18	3.22	9.5	94.7	550	0	4.94	0.8	0.34	0.06	0.04	10.0	0.08	0.019	26.3	1.68025698	1.1	-2.9	1.8	9.24	48.4	160.2	27.5	3.481012658	11.25	6.175
1671	0	614	0	16	F	62	21	0	6.4	3.48	10.2	93.1	514	0	4.92	1.18	0.24	0.03	0.03	11.0	0.13	0.0184	26.1	2.261197275	1.3	-2.7	2.6	11.62	48.3	159.3	24.6	7.423580786	6.779661017	4.169491525
1672	0	614	0	18	F	62	23	0	7.41	3.55	10.2	92.7	519	0	6.25	0.77	0.24	0.12	0.03	19.5	0.15	0.0259	26.7	3.321651684	1.5	-2.2	2.1	17.24	48.6	158.3	24.7	3.097345133	9.090909091	8.116883117
1673	0	615	1	1	M	52	7	0	8.94	4.02	12.1	88.1	161	0	8.18	0.64	0.08	0	0.04	17.2	0.11	0.0153	31.6	5.973552212	1.3	1.1	0.3	9.62	50.9	151.4		8	7.8125	12.78125
1674	0	615	0	2	M	52	8	0	10.58	3.92	12	85.2	188	0	9.75	0.62	0.19	0	0.02	41.9	0.26	0.0141	30.8	6.471893491	2.1	-0.1	0.4	12.17	53.1	150.7		14.45086705	9.677419355	15.72580645
1675	0	615	0	4	M	52	10	0	5.27	3.95	11.7	86.6	270	0	4.36	0.6	0.29	0	0.02	36.7	0.22	0.013	32.9	5.101777892	2	2.3	0.2	13.77	54.8	149.5		11.94029851	13.33333333	7.266666667
1676	0	616	1	1	F	81	6	1	7.25	3.03	8.4	92.4	149	0	5.12	1.65	0.34	0.12	0.02	4.2	0.07	0.0194	21.6	4.515135967	2.9	-5.9	2	6.73	55.2	158.9		9.265175719	1.212121212	3.103030303
1677	0	616	0	3	F	81	8	1	5.7	2.76	7.7	93.8	153	0	3.86	1.28	0.28	0.27	0.01	3.1	0.04	0.0113	24.2	5.426716141	2.6	-3	2.9	8.30	57.4	156.6		9.375	0.78125	3.015625
1678	0	616	0	4	F	81	9	1	5.88	2.99	8.3	93.3	177	0	3.92	1.37	0.24	0.34	0.01	4.4	0.06	0.0135	25.6	5.456965395	2.8	-1.5	3	9.66	56.1	156.9		6.046511628	2.919708029	2.861313869
1679	0	616	0	6	F	81	11	1	8.73	3.39	9.6	85.5	198	0.01	6.81	1.37	0.52	0.02	0.01	11.7	0.16	0.0214	31.7	6.901359359	4.6	2.8	0.8	13.66	55.1	151.1		13.23529412	18.24817518	4.97080292
1680	0	617	1	0	F	83	1	1	7.63	4.93	15.1	94.1	165	0	5.89	0.82	0.91	0	0.01	6.1	0.05				0.8				47.4	163	15.9	0.710900474	4.87804878	7.182926829
1681	0	617	0	1	F	83	2	1	5.41	4.68	14.5	93.6	147	0	3.39	1.39	0.61	0	0.02	2.2	0.03	0.0253	31.3	3.777985075	0.9	-0.5	0.1	5.55	48.4	158.4	15.1	0.875656743	2.158273381	2.438848921
1682	0	617	0	3	F	83	4	1	6.81	4.45	13.8	92.4	162	0	5.37	0.64	0.78	0.01	0.01	7.8	0.05	0.0209	31.2	6.391304348	1.1	-0.5	0.1	10.35	47.4	157.6	15.6	0.557103064	7.8125	8.390625
1683	0	617	0	5	F	83	6	1	9.97	4.47	13.9	91.5	226	0	8.32	0.85	0.78	0.01	0.01	14.1	0.12	0.0197	29.2	3.950695322	1.1	-2.4	0.1	8.93	47.8	155.6	16.5	1.525658807	5.882352941	9.788235294
1684	0	618	1	2	F	76	9	0	4.6	3.51	9.1	84.9	325	0.01	3.76	0.45	0.36	0.01	0.02	11.1	0.05	0.0649	20.8	7.575757576	5.4	-4.5	4.9	24.62	47.3	157	20	3.939393939	11.11111111	8.355555556
1685	0	618	0	4	F	76	11	0	5.87	3.24	8.5	84.9	355	0	4.67	0.53	0.51	0.13	0.03	7.5	0.04	0.0726	22	8.507555372	5.8	-3.3	5.8	30.20	45.1	156.6	17	2.731092437	7.547169811	8.811320755
1686	0	618	0	6	F	76	13	0	6.01	3.07	8.5	87.3	421	0	4.64	0.66	0.56	0.11	0.04	7.6	0.05	0.0725	23.4	5.392751864	6.1	-2.4	3.7	22.70	46.9	157.7	18.2	0.561797753	4.545454545	7.03030303
1687	0	618	0	8	F	76	15	0	6.81	3.24	8.9	85.2	434	0	5.07	1.03	0.59	0.05	0.07	3.9	0.04	0.0852	24.8	4.631927213	7.1	-1.4	3.5	20.10	47.1	159.4	14.6	0.553505535	1.941747573	4.922330097
1688	0	619	1	2	M	54	10	0	4.74	4.93	14.4	88.2	286	0	3.88	0.61	0.23	0.01	0.01	6.6	0.04	0.0316	30.4	4.753004005	1.4	1	0.8	13.59	49.4	142.9	11.5	6.25	6.557377049	6.360655738
1689	0	619	0	4	M	54	12	0	5.65	5.01	14.6	89	410	0	4.59	0.63	0.34	0.08	0.01	9.5	0.06	0.0351	31.7	3.922764228	1.3	1.8	0.1	16.08	49.9	140.8	7.9	0.643086817	3.174603175	7.285714286
1690	0	620	1	3	M	60	12	1	10.42	4.47	13.7	91.3	324	0	9.27	0.26	0.83	0.02	0.04	42.3	0.11	0.0282	30.3	3.082276908	0.8	-1	0.1	9.99	51.8	159	15.4	0.536193029	7.692307692	35.65384615
1691	0	620	0	3	M	60	12	1	11.15	4.42	13.5	91	328	0	9.78	0.29	0.99	0.05	0.04	51.7	0.15	0.0265	29.4	2.951219512	1	-1.5	0.2	9.68	51.1	158.7	10.3	0.110375276	3.448275862	33.72413793
1692	0	620	0	5	M	60	14	1	7.15	3.94	12	97.5	271	0	5.86	0.28	0.72	0.23	0.06	35.7	0.1	0.028	28.2	3.878627968	0.5	-1.7	0.9	10.51	54.3	160	14.3	1.689708141	3.571428571	20.92857143
1693	0	620	0	8	M	60	17	1	11.14	3.65	11.2	98.1	253	0	9.9	0.28	0.58	0.34	0.04	42.9	0.12	0.0303	26.6	4.121350887	0.5	-2.6	2	10.43	56.8	161.1	17.9	1.492537313	3.571428571	35.35714286
1694	0	621	1	2	M	78	23	1	7.68	3.58	11.4	94.4	203	0	6.74	0.59	0.27	0.06	0.02	15.3	0.09	0.0233	28.6	3.635808127	0.6	-3.1	0.5	7.38	46.1	146.8		5.905511811	5.084745763	11.42372881
1695	0	622	1	0	M	54	7	0	11.9	5.55	16.1	86.1	340	0	10.45	0.85	0.58	0	0.02	14.1	0.12				2.2				50	153	16.5	6.307977737	9.411764706	12.29411765
1696	0	622	0	5	M	54	12	0	7.91	4.71	13.7	85.4	508	0	6.31	0.69	0.8	0.06	0.05	44.9	0.31	0.0278	32.1	1.602652666	2.1	2.5	0.1	8.14	53.3	152.1	13	0.272479564	4.347826087	9.144927536
1697	0	623	1	0	F	65	2	0	4.25	5.24	15.4	82.6	181	0	3.14	0.54	0.56	0	0.01	3.7	0.02	0.0555	32	1.077752117	2.9	2	0.1	1.95	47.9	153.6	3.7	1.520912548	1.851851852	5.814814815
1698	0	623	0	2	F	65	4	0	1.12	4.47	12.9	87	127	0	0.6	0.31	0.2	0	0.01	3.2	0.01	0.0299	27.9	1.246458924	1.8	-1.5	0.2	1.58	49.9	151.7		3.409090909	6.451612903	1.935483871
1699	0	623	0	4	F	65	6	0	1.69	4.82	13.8	86.7	133	0	0.72	0.8	0.15	0.01	0.01	1.3	0.01	0.028	27.1	2.771493213	2	-2.3	0.3	3.69	51.2	149.8		8.843537415	2.5	0.9
1700	0	623	0	6	F	65	8	0	2.08	4.69	13.7	87.6	172	0	1.29	0.61	0.16	0.02	0	3.3	0.02	0.0192	30.7	2.574750831	2	1.2	0.3	4.43	50.5	143.4	8.2	11.33333333	1.639344262	2.114754098
1701	0	624	1	0	M	80	1	1	9.87	4.89	14.8	94.3	306	0	7.64	0.42	1.78	0	0.03	19.0	0.08	0.0812	34	4.787493894	1.8	3.9	0.4	14.65	43.7	149.4	4.8	0.425531915	0	18.19047619
1702	0	624	0	1	M	80	2	1	5.74	3.91	11.8	96.2	243	0	4.67	0.49	0.57	0	0.01	10.2	0.05	0.0575	34.1	5.156202608	1.4	3.9	0.4	12.53	44.8	150.6	6.1	0	2.040816327	9.530612245
1703	0	624	0	3	M	80	4	1	11.31	4.7	14.4	95.1	271	0.01	9.29	0.85	1.15	0	0.02	8.2	0.07	0.0663	32.4	5.623805624	1.7	2.2	0.5	15.24	42.5	148.8	2.4	0.483091787	0	10.92941176
1704	0	625	1	0	M	74	7	1	2.95	5.69	17.8	95.8	91	0.01	2.3	0.49	0.12	0	0.04	20.4	0.1	0.0495	30.6	22.04391892	0.7	-1.3	0.1	20.06	91.6	153.8		74.78991597	0	4.693877551
1705	0	625	0	2	M	74	9	1	8.92	3.64	11.3	98.1	75	0.05	7.82	0.58	0.45	0	0.07	77.6	0.45	0.0269	26.8	18.29622459	0.7	-4.4	0.3	13.72	78	152.1		29.00232019	18.96551724	13.48275862
1706	0	625	0	3	M	74	10	1	9.81	3.57	11.1	95	68	0.09	8.42	0.76	0.59	0	0.04	63.2	0.48	0.0214	29	17.53653445	0.7	-2.8	0.1	11.92	66.1	149.9		10.23765996	17.10526316	11.07894737
1707	0	625	0	4	M	74	11	1	12.1	3.54	11.2	92.1	85	0.13	10.77	0.65	0.64	0	0.04	184.6	1.2	0.0184	30.2	22.62521589	1.2	-1.2	0.4	19.23	58.1	149.9		3.298611111	23.07692308	16.56923077
1708	0	625	0	7	M	74	14	1	22.07	3.57	11.2	92.2	121	0.1	20.44	0.95	0.53	0.03	0.12	140.0	1.33	0.0796	35	18.96758703	1.5	4.5	0.7	22.95	54.2	151.2		10.45081967	14.73684211	21.51578947
1710	0	627	1	0	F	63	8	0	1.89	4.83	14.5	90.1	24	0	1.59	0.2	0.1	0	0	5.0	0.01	0.0324	31.5	27.2479564	1.9	1.1	0.1	6.54	47	149.9		15.78947368	5	7.95
1711	0	627	0	1	F	63	9	0	1.96	4.76	14.2	90.3	32	0											1.9
1712	0	627	0	3	F	63	11	0	2.47	4.63	14	89.4	48	0	1.86	0.47	0.11	0.02	0.01	0.0	0	0.0407	33.5	25.12155592	2	3	0.2	12.06	47.3	147.4		2.02020202	4.255319149	3.957446809
1713	0	627	0	5	F	63	13	0	3.19	4.52	13.6	90.5	52	0.01	2.81	0.22	0.13	0.02	0.01	9.1	0.02	0.0452	34.2	15.45064378	1.8	4.3	1	8.03	45.3	147.7	22.7	1.834862385	4.545454545	12.77272727
1714	0	628	1	0	M	71	7	0	4.96	4.15	13	86.7	189	0.01	4.03	0.58	0.33	0.01	0.01	8.6	0.05	0.0154	33	4.192872117	1.1	1.1	0.1	7.92	49.9	160.2		2.280130293	5.172413793	6.948275862
1715	0	628	0	1	M	71	8	0	5.97	4.25	13.4	88.9	218	0	4.93	0.66	0.33	0.04	0.01	4.5	0.03	0.014	31.7	2.922077922	0.8	-0.2	0.1	6.37	49	159.4	9.1	2.739726027	4.545454545	7.46969697
1716	0	628	0	3	M	71	10	0	6.84	4	12.6	90.5	305	0	5.88	0.57	0.36	0.02	0.01	8.8	0.05	0.0188	31.3	2.559286217	0.8	-0.2	0.1	7.81	52.6	155.9		5.705705706	12.28070175	10.31578947
1717	0	629	1	0	M	68	10	0	4.27	4.88	14.4	86.5	122	0	3.29	0.61	0.34	0.02	0.01	1.6	0.01	0.0229	32.3	9.44741533	1.5	1.9	0.1	11.53	49.4	159.7	9.8	8.080808081	4.918032787	5.393442623
1718	0	629	0	1	M	68	11	0	5.59	4.5	13.4	87.8	130	0.01	4.5	0.58	0.5	0	0.01	5.2	0.03	0.0185	30.2	6.078536848	1.4	0.3	0.4	7.90	53.4	159.1		13.21585903	6.896551724	7.75862069
1719	0	629	0	5	M	68	15	0	6.53	4.38	12.6	88.1	283	0	4.46	0.79	1.23	0.03	0.02	3.8	0.03	0.0267	31.7	4.017740673	1.3	1.9	0.2	11.37	51.6	157.2	25.3	2.831858407	12.65822785	5.64556962
1720	0	630	1	0	M	65	14	0	12.14	4.69	14.8	93.4	332	0	10.27	1	0.84	0	0.03	12.0	0.12	0.0333	29.6	3.349392062	0.9	-1.6	0.3	11.12	45.1	155.6	14	2.51572327	5	10.27
1721	0	630	0	1	M	65	15	0	11.55	4.9	15.1	93.1	378	0	9.99	0.72	0.74	0.07	0.03	19.4	0.14	0.0377	29	3.868360277	0.9	-2.6	0.3	14.62	46.6	155.5	11.1	1.838755304	4.166666667	13.875
1722	0	630	0	3	M	65	17	0	6.89	4.19	13	94	469	0	5.3	0.81	0.59	0.17	0.02	6.2	0.05	0.0406	28.5	2.859517872	0.8	-2.7	0.2	13.41	48.2	158.5	13.6	1.509433962	6.172839506	6.543209877
1723	0	631	1	0	M	31	8	0	3.6	5.69	15.2	84.5	174	0	1.43	1.89	0.26	0	0.02	0.5	0.01	0.0154	30.9	3.756957328	3.5	3.5	0.4	6.54	55.4	157.3	15.3	3.734439834	4.761904762	0.756613757
1724	0	631	0	2	M	31	10	0	5.37	5.4	14.5	84.8	241	0	3.72	1.39	0.24	0	0.02	3.6	0.05	0.0167	29.6	2.949394598	3.5	1.8	0.4	7.11	53.3	153.2		6.572769953	6.474820144	2.676258993
1725	0	631	0	4	M	31	12	0	4.48	5.27	14.2	86.7	321	0	2.23	1.85	0.36	0.01	0.03	3.2	0.06	0.019	27.7	3.226571767	2.6	0.4	0.4	10.36	56	150.3		4.385964912	12.43243243	1.205405405
1726	0	631	0	6	M	31	14	0	5.72	5.52	15	86.4	443	0	3.14	1.87	0.6	0.05	0.06	5.9	0.11	0.0342	29.5	2.787579393	2.8	2.2	0.4	12.35	51.9	148.7		1.688555347	10.16042781	1.679144385
1727	0	632	1	0	M	57	7	0	4.44	5.41	16.2	88.9	96	0	3.27	0.67	0.5	0	0	1.5	0.01	0.0206	32.2	12.95843521	1.5	1.5	0.2	12.44	47.1	150.4	7.5	2.777777778	2.985074627	4.880597015
1728	0	632	0	2	M	57	9	0	4.08	4.48	13.7	88.8	157	0	2.85	0.73	0.49	0.01	0	2.7	0.02	0.0175	32.2	6.987093903	1.4	1.1	0.2	10.97	48.7	145.2	8.2	0.433839479	2.739726027	3.904109589
1729	0	632	0	4	M	57	11	0	5.16	4.42	13.4	88.7	247	0	3.78	0.57	0.76	0.04	0.01	8.8	0.05	0.0212	29.9	7.884972171	1.3	-0.9	0.1	19.48	51.4	141.5	14	1.813110181	8.771929825	6.631578947
1730	0	632	0	6	M	57	13	0	7.13	4.53	13.9	86.8	306	0	5.41	0.59	1.04	0.07	0.02	15.3	0.09	0.0245	30	5.61108587	1.7	-1.1	0.2	17.17	48.1	143.3	11.9	0.520291363	6.779661017	9.169491525
1731	0	633	1	0	M	61	7	0	3.94	5.68	16.3	86.3	205	0	2.66	0.73	0.53	0	0.02	2.7	0.02				2.2				49.2	156.3	11	0.623700624	1.369863014	3.643835616
1732	0	633	0	3	M	61	10	0	7	5.51	16	85.3	247	0	5.22	0.88	0.88	0	0.02	3.4	0.03	0.0298	29.6	3.034371643	2.6	-0.2	0.1	7.49	45.6	156.2	8	0.770218228	2.272727273	5.931818182
1733	0	633	0	5	M	61	12	0	6.69	5.14	14.6	88.5	335	0	4.84	0.91	0.92	0.01	0.01	3.3	0.03	0.0262	26.2	3.166472643	1.7	-3	0.3	10.61	47.8	154.5	8.8	0.576701269	1.098901099	5.318681319
1734	0	633	0	7	M	61	14	0	8.11	5.22	14.8	87.4	440	0	6.1	1.12	0.84	0.02	0.03	5.4	0.06	0.0292	29.6	2.071713147	1.9	-0.3	0.2	9.12	48.1	152.7	8	0.257400257	1.785714286	5.446428571
1735	0	634	1	0	M	70	6	1	5.03	4.83	14.7	89.6	145	0	3.98	0.65	0.4	0	0	1.5	0.01	0.0266	29.8	6.927374302	1.3	-0.9	0.1	10.04	52.7	154.8	7.7	8.516483516	3.076923077	6.123076923
1736	0	634	0	2	M	70	8	1	7.53	5.37	16.1	89.2	182	0	6.36	0.79	0.38	0	0	6.3	0.05	0.0311	29.6	7.489786655	1.5	-1	0.2	13.63	50.4	153.3	8.9	4.761904762	6.329113924	8.050632911
1737	0	634	0	5	M	70	11	1	9.89	4.52	13.6	94.9	219	0	8.75	0.68	0.43	0.01	0.02	14.7	0.1	0.0244	25.3	5.693693694	1	-4.4	1.2	12.47	52.1	147.9	13.2	6.345177665	11.76470588	12.86764706
1738	0	634	0	8	M	70	14	1	8.36	4.01	11.9	96.5	301	0	7.48	0.35	0.49	0.03	0.01	22.9	0.08	0.0201	26.5	6.23345367	1.1	-2.9	1.6	18.76	52	147.2	31.4	1.769911504	22.85714286	21.37142857
1739	0	635	1	0	M	49	8	0	6.23	5.04	15.7	91.5	157	0	4.06	1.33	0.83	0	0.01	2.3	0.03				0.7				51.9	161.1	9	0.673854447	3.007518797	3.052631579
1740	0	635	0	5	M	49	13	0	7.27	4.91	15.2	91.9	235	0	5.3	1.36	0.59	0	0.02	8.8	0.12	0.0358	32.9	3.981723238	0.8	1.4	0.1	9.36	50.7	154		2.752293578	8.823529412	3.897058824
1741	0	635	0	6	M	49	14	0	7.99	4.38	13.7	92.7	280	0	6.44	0.97	0.55	0.01	0.02	13.4	0.13	0.0315	32.1	3.146067416	0.8	0.9	0.3	8.81	50.5	155.5		2.574257426	11.34020619	6.639175258
1742	0	636	1	0	M	73	5	0	6.05	5.23	15.7	89.1	79	0	5.35	0.52	0.17	0	0.01	13.5	0.07	0.0173	30.7	4.744852283	2.4	-0.1	0.4	3.75	54.2	152.4		9.615384615	1.923076923	10.28846154
1743	0	636	0	1	M	73	6	0	5.53	4.83	14.7	89	100	0	4.89	0.42	0.21	0	0.01	7.1	0.03	0.0116	31.6	4.701195219	2.5	1.1	0.6	4.70	53.6	152.5	2.4	5.97826087	0	11.64285714
1744	0	636	0	3	M	73	8	0	4.58	4.72	13.9	90	172	0	3.94	0.41	0.2	0.02	0.01	9.8	0.04	0.0222	31.4	4.729422465	2.2	1.2	0.5	8.13	56.1	152.1	7.3	1.657458564	2.43902439	9.609756098
1745	0	636	0	5	M	73	10	0	5.25	4.6	13.6	89.6	239	0	4.18	0.61	0.35	0.08	0.03	8.2	0.05	0.0193	33.2	3.095975232	2.3	2.5	0.5	7.40	52.6	151.1	13.1	2.8125	6.557377049	6.852459016
1746	0	637	1	0	M	49	10	0	11.63	4.68	15.3	93.2	285	0.01	6.5	4.82	0.3	0	0.01	2.3	0.11	0.029	33	2.892076182	0.6	0	0.1	8.24	49.1	154.6	4.6	2.255639098	0.622406639	1.348547718
1747	0	637	0	2	M	49	12	0	11.08	4.17	13.4	94.2	362	0	5.91	4.66	0.49	0.01	0.01	1.7	0.08	0.0304	32.7	2.887511072	0.5	-0.4	0.1	10.45	50	153.1		1.55210643	0.858369099	1.268240343
1748	0	637	0	4	M	49	14	0	14.21	4.12	13.5	95.1	485	0	6.9	6.33	0.92	0.03	0.03	1.7	0.11	0.0325	31.4	2.371312898	0.5	-1.1	0.1	11.50	48.4	152.4		4.606060606	0	1.090047393
1749	0	638	1	0	M	74	10	0	6.65	5.19	15.6	88.1	267	0	4.86	1.08	0.7	0	0.01	2.8	0.03	0.0343	30.7	4.665314402	1.3	-0.1	0.1	12.46	47.1	148.8	12	2.147239264	0.925925926	4.5
1750	0	638	0	2	M	74	12	0	6.89	4.85	14.8	87.4	319	0	5.15	1.08	0.61	0.03	0.02	8.3	0.09	0.0325	30.2	4.101019462	1.2	-0.7	0.2	13.08	47.7	146	12	0.54446461	1.851851852	4.768518519
1751	0	639	1	0	M	75	7	0	4.57	5.41	16.3	86.7	136	0	2.83	1.29	0.42	0.02	0.01	1.6	0.02	0.0308	31.5	5.629877369	1.9	0.6	0.1	7.66	49.3	148.3	1.6	3.045685279	0.775193798	2.19379845
1752	0	639	0	1	M	75	8	0	5.47	5.34	16	87.8	156	0	4.12	1.03	0.29	0.01	0.02	4.9	0.05	0.0352	30.8	7.057546145	1.7	0.2	0.1	11.01	52.9	147.1	5.8	2.602230483	1.941747573	4
1753	0	639	0	3	M	75	10	0	5.14	4.93	14.8	88	168	0	3.27	1.26	0.5	0.1	0.01	3.2	0.04	0.0385	32.3	10.02227171	1.4	1.7	0.1	16.84	53.4	144.8	4.8	4.175824176	3.174603175	2.595238095
1754	0	640	1	0	M	72	7	1	5.49	3.7	10.9	87	155	0	3.73	1.01	0.72	0.01	0.02	3.0	0.03	0.0348	28.6	11.2408128	2.2	-1.3	0.2	17.42	44.1	163.4	5.9	0	0.99009901	3.693069307
1755	0	640	0	2	M	72	9	1	6.46	4	11.5	88.3	243	0	4.85	1.1	0.47	0.02	0.02	5.5	0.06	0.034	27.9	8.456214264	2.1	-1.4	0.2	20.55	46.7	162.1		4.347826087	0.909090909	4.409090909
1756	0	640	0	6	M	72	13	1	10.82	3.95	11.5	87.6	397	0	9.43	0.72	0.61	0.01	0.05	22.2	0.16	0.0431	27.5	9.710144928	2.6	-1.9	0.5	38.55	44.4	158.5	19.4	4.469273743	9.722222222	13.09722222
1757	0	640	0	8	M	72	15	1	20.46	4.02	11.6	91.3	563	0	17.12	1.79	1.31	0.11	0.13	28.5	0.51	0.0651	27.3	7.539629679	1.7	-2	0.2	42.45	43.6	159.2	16.8	1.565074135	8.379888268	9.56424581
1758	0	641	1	0	M	84	4	1	9.63	4.13	13.3	95.2	370	0.03	8.13	0.97	0.51	0	0.02	18.6	0.18	0.1598	31.6	2.899126291	0.9	-0.6	0.3	10.73	45.5	148.3	15.5	3.958333333	8.24742268	8.381443299
1759	0	641	0	1	M	84	5	1	11.21	4.37	14.1	96.3	470	0.05	9.65	0.92	0.57	0.04	0.03	21.7	0.2	0.1595	32.4	2.689027035	0.9	-0.1	0.3	12.64	47	145.1	12	2.362204724	4.347826087	10.48913043
1760	0	642	1	0	F	47	5	0	4.44	5.5	15.7	86	170	0	3.13	0.99	0.31	0	0.01	1.0	0.01	0.0292	29.3	4.914122137	3	0.2	0.2	8.35	47.6	158.5	4	1.048951049	0	3.161616162
1761	0	642	0	5	F	47	10	0	4.12	5.23	14.9	87.6	149	0	2.3	1.51	0.31	0	0	1.3	0.02	0.0199	29.8	5.238375515	2.5	0.8	0.2	7.81	50.4	153.1	9.3	4.964539007	1.324503311	1.523178808
1762	0	642	0	7	F	47	12	0	3.79	5.29	14.8	85.6	182	0	2.23	1.23	0.32	0.01	0	0.8	0.01	0.0227	28.8	5.702739111	3	0.3	0.6	10.38	48.3	153.1	9.8	2.135231317	1.62601626	1.81300813
1763	0	643	1	0	F	75	6	0	9.27	4.44	14.1	93.2	315	0	8.28	0.51	0.43	0.02	0.03	7.8	0.04	0.0497	29	1.767151767	0.8	-3.1	0.1	5.57	51.9	154.2	11.8	2.272727273	3.921568627	16.23529412
1764	0	643	0	1	F	75	7	0	7.71	3.88	12.4	93.3	297	0	6.84	0.51	0.33	0	0.03	7.8	0.04	0.0442	29.5	2.813903996	0.8	-2.5	0.1	8.36	54.2	153.7	9.8	3.236245955	3.921568627	13.41176471
1765	0	643	0	3	F	75	8	0	6.81	3.83	12.3	94.5	298	0	5.8	0.48	0.5	0	0.03	22.9	0.11	0.0291	31.1	2.20226641	0.8	-1.2	0.2	6.56	55.6	152.4	14.6	1.991150442	6.25	12.08333333
1766	0	643	0	5	F	75	10	0	11.88	3.94	12.5	92.6	334	0	10.42	0.64	0.69	0.08	0.05	37.5	0.24	0.0307	32.5	2.424363855	0.8	0.1	0.1	8.10	51.9	153.6	14.1	1.892744479	6.25	16.28125
1767	0	643	0	7	F	75	12	0	15.6	3.8	12.1	93.7	250	0	13.73	0.61	0.95	0.26	0.05	86.9	0.53	0.0418	31.2	2.987654321	0.8	-0.6	0.3	7.47	51.2	154.8	14.8	1.355932203	3.278688525	22.50819672
1768	0	644	1	0	F	61	4	0	12.34	4.12	13.5	99.8	338	0	8.92	1.59	1.06	0.75	0.02	2.5	0.04	0.0676	35.6	2.692626346	0.3	2.7	0.1	9.10	44.5	154.3	10.1	0.720906282	0	5.610062893
1769	0	644	0	1	F	61	5	0	10.37	3.5	11.4	100.3	280	0	6.18	2.52	1.46	0.19	0.02	1.6	0.04	0.063	35.5	3.558718861	0.3	2.7	0.1	9.96	43.5	154.7	8.7	0.148920328	0.396825397	2.452380952
1770	0	645	1	0	F	64	4	0	2.96	4.54	14	90.5	147	0	1.9	0.63	0.41	0.01	0.01	1.6	0.01				1.3				46.7	160.3	12.7	1.081081081	0	3.015873016
1771	0	645	0	9	F	64	13	0	4.49	3.85	11.6	90.6	142	0	3.96	0.42	0.11	0	0	7.1	0.03	0.0146	27.9	10.73943662	1.8	-2	0.7	15.25	52.8	159.2		12	9.523809524	9.428571429
1772	0	645	0	13	F	64	17	0	3.04	3.82	11.4	90.6	199	0.01	2.46	0.4	0.13	0.04	0.01	12.5	0.05	0.0187	29.4	9.52685422	1.8	-0.7	0.4	18.96	53.7	157.7		6.299212598	7.5	6.15
1773	0	646	1	0	M	84	4	1	9.19	5.11	15.1	90	250	0.02	7.04	0.9	1.2	0	0.05	15.6	0.14	0.0767	30.2	5.708460754	1.7	0.1	0.4	14.27	48.6	155.9	8.9	0.821167883	1.111111111	7.822222222
1774	0	646	0	2	M	84	6	1	11.86	4.83	14.4	89.9	268	0	10.6	0.45	0.75	0.01	0.05	33.3	0.15	0.058	31.4	5.552455357	1.8	1	0.4	14.88	49.3	153.9	13.3	0.604229607	4.444444444	23.55555556
1775	0	646	0	6	M	84	10	1	20.48	4.92	14.5	93.1	260	0.1	17.74	1.02	1.61	0.06	0.05	115.7	1.18	0.0758	31.4	7.604055496	1.6	1.2	0.5	19.77	47.3	151.2	26.5	1.685393258	15.68627451	17.39215686
1776	0	647	1	0	M	82	14	1	8.45	4.72	15.5	96.2	88	0	6.59	1.2	0.66	0	0	3.3	0.04	0.016	33.9	13.58124495	0.5	0.9	0.1	11.95	47.7	155	4.2	1.485148515	2.5	5.491666667
1777	0	647	0	2	M	82	16	1	8.52	4.25	13.8	95.5	100	0	7.54	0.61	0.36	0	0.01	16.4	0.1	0.0166	34.8	13.30239753	0.5	2	0.1	13.30	50	153.7		7.012195122	6.557377049	12.36065574
1778	0	648	1	0	M	75	5	0	3.96	4.8	14.2	90.2	119	0	2.43	0.91	0.59	0.02	0.01	1.1	0.01	0.0235	31.9	14.40846001	1.4	2.1	0.1	17.15	51	155.9	8.8	0.729927007	2.197802198	2.67032967
1779	0	649	1	0	M	57	7	0	4.77	4.31	13.1	87.7	158	0	3.24	0.83	0.68	0.01	0.01	2.4	0.02	0.0147	31.2	6.148282098	1.4	0.1	0.3	9.71	47.7	146.3	9.6	1.797385621	4.819277108	3.903614458
1780	0	649	0	1	M	57	8	0	5.37	4.07	12.2	88.5	158	0	4	0.54	0.79	0.02	0.02	7.4	0.04	0.0171	29.9	4.962192817	1.1	-0.8	0.1	7.84	47.1	146.7	9.3	1.912568306	5.555555556	7.407407407
1781	0	649	0	3	M	57	10	0	3.59	4.19	12.8	90.5	240	0	2.09	0.8	0.65	0.04	0.01	2.5	0.02	0.0218	31	4.417549168	0.9	0.2	0.2	10.60	48.4	143.7	17.5	1.803278689	7.5	2.6125
1782	0	649	0	6	M	57	13	0	7.79	4.41	13.4	89.8	301	0	6.52	0.4	0.85	0	0.02	12.5	0.05	0.03	32.6	2.980769231	1.1	2	0.1	8.97	48.6	146.3	17.5	0.520156047	7.5	16.3
1783	0	650	1	2	M	73	5	1	7	3.68	11.2	100.3	97	0.01	5.75	0.95	0.28	0.01	0.01	7.4	0.07	0.0294	27.2	8.03030303	1.1	-3.1	0.7	7.79	52.1	151.9		11.81102362	2.105263158	6.052631579
1784	0	651	1	10	F	40	1	0	4.97	4.4	13.1	92	206	0	3.18	1.27	0.42	0.08	0.02	0.8	0.01	0.0242	27.2	4.441997063	1.7	-2.3	0.4	9.15	50.8	158.2	10.2	1.57480315	1.57480315	2.503937008
1785	0	651	0	13	F	40	4	0	5.16	4.31	13.1	90.7	150	0	3.87	1.03	0.25	0	0.01	1.9	0.02	0.0142	27.8	6.735985533	1.8	-2	0.9	10.10	53	160.1	9.7	1.363636364	3.883495146	3.757281553
1786	0	651	0	16	F	40	7	0	6.45	4.2	12.6	89.8	192	0	5.2	0.88	0.36	0	0.01	5.7	0.05	0.0147	27.7	6.003098373	2	-2.3	1.1	11.53	54	155.7	15.9	6.727828746	6.818181818	5.909090909
1787	0	652	1	0	F	57	7	0	3.05	4.21	12.7	90.7	113	0	2.23	0.66	0.16	0	0	1.5	0.01	0.0177	28	4.016337645	0.7	-2.5	0.2	4.54	56	156	6.1	9.154929577	1.515151515	3.378787879
1788	0	652	0	2	F	57	9	0	3.81	4.24	13.1	89.4	185	0	2.99	0.6	0.22	0	0	1.7	0.01	0.017	33	3.939617084	0.9	1.8	0.2	7.29	54.6	155	6.7	1.005025126	1.666666667	4.983333333
1789	0	652	0	3	F	57	10	0	5.04	3.44	10.6	91.9	197	0	4.32	0.39	0.33	0	0	10.3	0.04	0.0124	31.5	3.200544774	0.7	1.2	0.3	6.31	56.9	153.5	12.8	10.03236246	5.128205128	11.07692308
1790	0	652	0	5	F	57	12	0	7.31	3.36	10.2	91.4	274	0	6.15	0.5	0.64	0.01	0.01	10.0	0.05	0.0118	31.2	2.070484581	0.7	0.7	0.2	5.67	56.3	150.7		11.38790036	8	12.3
1791	0	653	1	0	M	77	7	1	5.48	4.42	13.5	89.8	145	0	4.56	0.46	0.46	0	0	8.7	0.04	0.0234	31.3	5.80221998	0.9	0.3	0.1	8.41	48.5	154.2	10.9	1.93236715	4.347826087	9.913043478
1792	0	653	0	2	M	77	9	1	8.59	4.27	13.1	91.6	172	0	7.58	0.66	0.34	0	0.01	10.6	0.07	0.0184	32.1	6.461148649	0.8	0.8	0.1	11.11	49.5	150.6	12.1	2.98013245	7.575757576	11.48484848
1793	0	653	0	5	M	77	12	1	13.89	4.15	12.8	92	290	0	12.54	0.66	0.64	0.03	0.02	25.8	0.17	0.0378	32	5.193345324	0.7	0.7	0.1	15.06	51.1	149	22.7	3.035413153	18.18181818	19
1794	0	654	1	0	F	62	11	0	4.84	4.86	14.4	87.4	185	0	3.72	0.52	0.57	0.02	0.01	9.6	0.05	0.0296	29.8	3.498654364	1.9	-0.2	0.3	6.47	49.1	154.4	9.6	1.140684411	5.769230769	7.153846154
1795	0	654	0	2	F	62	13	0	2.69	4.34	13.1	90.1	202	0	1.52	0.74	0.31	0.11	0.01	1.4	0.01	0.0265	29.2	1.905751906	1.4	-1	0.4	3.85	47.7	153.4	9.5	1.428571429	4.054054054	2.054054054
1796	0	655	1	0	M	74	35	0	6.21	4.28	12.7	90.9	206	0	4.53	0.77	0.72	0.18	0.01	1.3	0.01	0.0257	31.3	2.015451797	2.1	2.4	1.7	4.15	47.6	165.8	5.2	0.305810398	1.298701299	5.883116883
1797	0	655	0	2	M	74	37	0	5.45	4.46	12.9	90.4	204	0	3.53	1.04	0.66	0.21	0.01	1.9	0.02	0.0254	31.9	2.325581395	2.2	2.1	0.7	4.74	49.9	165.2	4.8	0.848896435	0	3.394230769
1798	0	656	1	0	F	75	1	0	6.08	5.33	14.8	83.5	223	0.01	4.02	1.66	0.39	0	0.01	1.2	0.02	0.0394	27.9	1.992409867	3.9	-1.3	0.1	4.44	48	153	6	2	4.21686747	2.421686747
1799	0	656	0	2	F	75	3	0	4.51	4.65	13.2	83.4	227	0	2.77	1.37	0.36	0.01	0	2.2	0.03	0.0349	28.3	1.853411963	4	-0.9	0.2	4.21	52.9	148.2		6.268656716	6.569343066	2.02189781
1800	0	656	0	3	F	75	4	0	4.51	4.89	13.6	82.6	276	0	2.38	1.6	0.47	0.05	0.01	1.3	0.02	0.0396	28.5	2.612704918	4.5	-0.7	0.2	7.21	50.6	148.9	8.1	3.614457831	6.25	1.4875
1801	0	657	1	0	F	73	7	0	5.04	4.03	11.7	85.1	133	0	4.48	0.44	0.11	0	0.01	2.3	0.01	0.0181	27.2	6.850770048	3.2	-2	0.4	9.11	48.5	152.6	6.8	3.03030303	6.818181818	10.18181818
1802	0	657	0	2	F	73	9	0	4.17	4.04	11.5	87.1	162	0	3.63	0.36	0.15	0.02	0.01	5.6	0.02	0.0178	26.9	7.960644007	2.5	-1.8	0.6	12.90	50	153.1	11.1	1.408450704	5.555555556	10.08333333
1803	0	658	1	0	M	63	7	0	5.08	5.26	14.9	85.2	196	0	3.5	1.18	0.39	0	0.01	0.8	0.01	0.0316	29.1	4.87804878	2.3	0.3	0.4	9.56	51.9	153.3		1.988636364	5.084745763	2.966101695
1804	0	658	0	1	M	63	8	0	4.67	4.8	14	83.5	187	0	3.41	0.99	0.26	0	0.01	2.0	0.02	0.025	29.4	5.134474328	2.9	-0.2	0.2	9.60	49	152.7	6.1	2.136752137	4.04040404	3.444444444
1805	0	658	0	3	M	63	10	0	9.08	5.05	14.3	84.8	302	0	7.71	0.82	0.54	0	0.01	12.2	0.1	0.0409	31.4	6.19813278	2.6	1.7	0.1	18.72	47.4	150	15.9	2.028397566	12.19512195	9.402439024
1806	0	658	0	5	M	63	12	0	10.87	4.78	13.9	85.4	385	0	9.49	0.91	0.45	0	0.02	18.7	0.17	0.0588	30	4.189336235	2.4	0.9	0.2	16.13	50.8	149.9	13.2	3.529411765	8.791208791	10.42857143
1807	0	659	1	0	F	90	7	1	12.03	5.1	15.1	92.9	176	0	10.1	1.42	0.47	0.01	0.03	3.5	0.05	0.0444	31.1	7.139588101	1.1	1.1	0.2	12.57	49.1	157.9	4.9	1.170960187	2.112676056	7.112676056
1808	0	659	0	4	F	90	11	1	8.08	4.52	13.3	91.8	156	0	5.91	1.28	0.81	0.06	0.02	4.7	0.06	0.0316	24.3	7.40393627	1.4	-5.9	0.3	11.55	52.6	153.9		4.587155963	21.875	4.6171875
1809	0	660	1	0	M	57	7	0	9.59	4.4	14.7	94.3	262	0	8.07	0.88	0.63	0	0.01	10.2	0.09	0.0277	33.7	2.963545764	0.6	0.3	0.2	7.76	49.4	151.6	10.2	1.03626943	7.954545455	9.170454545
1810	0	660	0	2	M	57	9	0	7.92	3.95	13.3	96.5	339	0	5.9	1.15	0.83	0.03	0.01	6.1	0.07	0.0265	34.7	2.479666733	0.5	1.3	0.2	8.41	50.6	150.5	8.7	0.964187328	6.086956522	5.130434783
1811	0	661	1	0	M	58	8	0	4.25	4.48	14.1	93.5	266	0	3.12	0.75	0.36	0.01	0.01	2.7	0.02	0.0184	30	2.866502867	0.4	-1.6	0.5	7.62	46.8	156.1	9.3	2.416918429	4	4.16
1812	0	661	0	2	M	58	10	0	5.68	4.16	13	93.3	295	0	4.44	0.67	0.5	0.06	0.01	4.5	0.03	0.0196	30.3	2.457790126	0.5	-1.5	0.6	7.25	50.1	151.8	11.9	3.703703704	5.970149254	6.626865672
1813	0	662	1	0	F	63	10	0	1.48	4.46	12.8	84.5	189	0	0.92	0.47	0.07	0.01	0.01	2.1	0.01	0.0156	29.8	4.06504065	2.4	0.4	0.2	7.68	46.7	150		9.230769231	8.510638298	1.957446809
1814	0	662	0	1	F	63	11	0	1.38	4.29	12.2	85.8	184	0	0.69	0.57	0.1	0.01	0.01	0.0	0	0.0146	28.7	4.260758415	2	-0.5	0.5	7.84	45.9	147.4		16.27906977	3.50877193	1.210526316
1815	0	662	0	3	F	63	13	0	2.1	4.46	12.7	87.7	268	0	1.32	0.59	0.16	0.02	0.01	1.7	0.01	0.0192	28.6	3.025851939	1.7	-0.3	0.8	8.11	47.5	146.1	15.3	1.449275362	6.779661017	2.237288136
1816	0	663	1	0	M	86	3	1	15.26	4.62	14.4	95.9	276	0.01	12.77	1.75	0.72	0	0.02	8.6	0.15	0.0254	29.7	9.154024171	1.2	-1.9	0.2	25.27	48	147.1	10.3	2.040816327	8	7.297142857
1817	0	663	0	2	M	86	5	1	13.79	4.4	13.4	97.7	340	0.01	11.85	1.27	0.65	0	0.02	13.4	0.17	0.0317	30.5	9.687279567	1	-0.6	0.3	32.94	52.2	147.3	16.5	3.924914676	14.96062992	9.330708661
1818	0	663	0	4	M	86	7	1	12.5	4.1	12.5	95.6	341	0	10.76	1.05	0.57	0.1	0.02	15.2	0.16	0.0324	31.6	13.23119777	1.5	0.2	0.4	45.12	50.9	147.1	15.2	2.713178295	13.33333333	10.24761905
1819	0	664	1	0	M	52	14	0	4.45	5.2	15	86.7	205	0	3.17	0.94	0.33	0	0.01	1.1	0.01	0.0364	31.5	1.759296281	1.6	1.8	0.1	3.61	52.5	165.9	8.5	0.955414013	3.191489362	3.372340426
1820	0	664	0	2	M	52	16	0	4.31	4.54	13.5	84.8	196	0	3.31	0.74	0.26	0	0	4.1	0.03	0.0241	33.2	1.930355791	1.9	2.8	0.1	3.78	52.9	162.6		2.489626556	2.702702703	4.472972973
1821	0	665	1	0	M	73	4	0	3.03	4.57	13.1	84.5	151	0	1.9	0.66	0.46	0	0.01	3.0	0.02	0.0206	29.4	4.162812211	3.3	-0.1	0.2	6.29	51	155.1	4.5	0	1.515151515	2.878787879
1822	0	665	0	1	M	73	5	0	6.68	4.25	13.4	91.3	127	0	5.81	0.54	0.32	0	0.01	11.1	0.06	0.0204	28.1	3.718309859	0.7	-3.4	0.4	4.72	50	152	7.4	17.76315789	5.555555556	10.75925926
1823	0	665	0	2	M	73	6	0	6.65	4.04	11.6	85.9	178	0	5.42	0.73	0.49	0	0.01	4.1	0.03	0.0238	28.5	3.351955307	2.7	-0.5	0.3	5.97	55.4	154.2	4.1	1.10619469	2.739726027	7.424657534
1824	0	665	0	4	M	73	8	0	7.95	4.21	12	85	246	0	6.76	0.66	0.52	0	0.01	10.6	0.07	0.0227	28	3.731122298	3.1	-1	0.5	9.18	51.8	152.9	12.1	1.247401247	9.090909091	10.24242424
1825	0	665	0	5	M	73	9	0	9.91	4.35	13.1	90.8	402	0	8.74	0.68	0.46	0.01	0.02	7.4	0.05	0.0291	28.9	5.110182371	1.2	-1.7	0.5	20.54	53.1	154.8	13.2	0.717703349	5.882352941	12.85294118
1826	0	666	1	0	M	68	3	1	10.14	4.91	15.5	89.6	257	0	9.57	0.34	0.21	0	0.02	17.6	0.06	0.0221	32.1	2.488938053	0.9	0.2	0.3	6.40	50.9	152.9	8.8	0	2.941176471	28.14705882
1827	0	666	0	2	M	68	5	1	7.49	4.55	14.2	91.9	354	0	6.85	0.32	0.26	0.04	0.02	46.9	0.15	0.0396	32.2	2.097759674	0.7	0.6	0.2	7.43	56.1	149.2	9.4	6.557377049	3.125	21.40625
1828	0	666	0	4	M	68	7	1	7.49	4.34	13.5	90.3	233	0											1
1829	0	666	0	6	M	68	9	1	12.35	3.83	12.1	100.3	166	0.01	10.95	0.66	0.34	0.32	0.08	33.3	0.22	0.0107	30.8	3.046875	0.4	-0.1	1.4	5.06	60.4	158.1	15.2	3.55987055	3.03030303	16.59090909
1830	0	667	1	0	M	68	14	0	16.3	5.03	15.2	87.1	368	0	14.66	1.08	0.49	0.03	0.04	18.5	0.2	0.0377	31	4.937775994	1.8	0.3	0.1	18.17	48.6	155.4	19.4	3.002309469	11.11111111	13.57407407
1831	0	668	1	5	M	78	4	1	6.87	3.5	11.1	101.7	394	0	4.85	1.46	0.52	0	0.04	4.8	0.07	0.0353	31	2.168861348	0.6	-0.8	0.6	8.55	47.9	149.6	17.8	2.096436059	4.109589041	3.321917808
1832	0	669	1	4	M	49	14	0	6.82	3.95	12.5	92.4	265	0	5.71	0.46	0.62	0	0.03	58.7	0.27	0.0237	27.6	2.505060729	0.7	-3.5	1.1	6.64	53.9	145.3	21.7	3.096539162	10.86956522	12.41304348
1833	0	670	1	0	F	53	14	0	6.24	4.92	15.3	92.9	313	0	4.85	1	0.37	0.01	0.01	3.0	0.03	0.0285	32.5	2.604166667	0.9	1.1	0.1	8.15	48.1	155.9	8	3.151862464	2	4.85
1834	0	670	0	3	F	53	17	0	5.89	4.45	13.6	92.6	388	0.01	4.8	0.79	0.28	0.01	0.01	7.6	0.06	0.0276	31.4	2.177433867	0.9	0	0.2	8.45	50.7	154.1	11.4	5	3.797468354	6.075949367
1835	0	671	1	0	M	76	4	0	9.99	4.3	13	90.7	252	0	8.6	1.15	0.22	0	0.02	3.5	0.04	0.0206	26.9	3.549190535	1.2	-3.6	0.5	8.94	52	158		5.445544554	2.608695652	7.47826087
1836	0	672	1	0	M	75	15	1	6.05	5.12	15.4	87.1	176	0	4.94	0.75	0.3	0.05	0.01	2.7	0.02	0.0323	28.1	6.676003735	2.2	-1.8	0.5	11.75	47.1	147.9	16	5.769230769	13.33333333	6.586666667
1837	0	672	0	1	M	75	16	1	5.74	4.73	13.9	88.2	168	0	4.66	0.72	0.3	0.05	0.01	8.3	0.06	0.0341	28.2	6.428571429	2.1	-1.7	0.5	10.80	48.7	145.9		10.18867925	9.722222222	6.472222222
1838	0	672	0	3	M	75	18	1	6.99	4.56	13.3	87.3	212	0	6.18	0.45	0.31	0.04	0.01	11.1	0.05	0.0324	27	6.594594595	2.4	-2.6	0.8	13.98	49.7	145.5	13.3	1.418439716	11.11111111	13.73333333
1839	0	673	1	0	F	58	5	0	4.03	4.77	14.8	91.4	142	0	2.45	1.13	0.43	0.01	0.01	1.8	0.02	0.0305	33.6	8.938547486	0.7	2	0.1	12.69	47.3	155.2	8	1.005025126	1.769911504	2.168141593
1840	0	673	0	3	F	58	8	0	5.95	4.19	13	90.9	176	0	4.15	1.22	0.53	0.04	0.01	3.3	0.04	0.0331	33.6	5.655526992	0.7	2	0.1	9.95	47.5	151	8.2	2.05338809	3.278688525	3.401639344
1841	0	674	1	0	M	67	7	1	11.79	4.63	14.5	95.2	215	0	10.21	0.92	0.61	0.01	0.04	17.4	0.16	0.031	27	2.512886598	0.7	-4.6	0.7	5.40	48.5	149.4		3.31010453	11.95652174	11.09782609
1842	0	674	0	3	M	67	10	1	11.08	4.76	15	96.6	268	0.01	9.82	0.82	0.38	0.03	0.03	15.9	0.13	0.0328	28.9	3.740648379	0.9	-2.8	0.5	10.02	51.6	150.7	22	5.128205128	14.63414634	11.97560976
1843	0	675	1	0	M	83	7	0	8.96	4.56	14.5	94.7	206	0	7.99	0.52	0.45	0	0	13.5	0.07	0.0269	31.1	7.738542449	0.8	-1.6	0.2	15.94	45.5	150.1	11.5	1.707317073	9.615384615	15.36538462
1844	0	676	1	0	M	77	7	1	2.54	2.23	7.3	99.1	63	0.03	0.21	1.05	1.25	0.02	0.01	1.9	0.02	0.0807	38	2.366863905	1.7	6.9	1.6	1.49	61.1	165.8		6.007393715	4.761904762	0.2
1845	0	676	0	1	M	77	8	1	3.84	2	6.6	98.5	62	0.02	0.25	1.11	2.47	0.01	0	2.7	0.03	0.0684	36.6	4.089581305	2.1	4.6	1.1	2.54	58.7	171.3		14.95652174	0	0.225225225
1846	0	676	0	3	M	77	10	1	4.86	2.44	7.8	95.1	60	0.03	0.37	1.23	3.26	0	0	2.4	0.03	0.0449	33	5.427974948	2.4	1.5	1.1	3.26	66.6	170.6		22.67404034	0	0.300813008
1847	0	677	1	0	M	82	14	1	7.85	4.37	14	89.9	161	0	5.66	1.6	0.59	0	0	1.9	0.03	0.0249	31.3	7.569346497	1.1	-0.7	0.2	12.19	50.1	153.5	6.3	1.481481481	3.75	3.5375
1848	0	677	0	2	M	82	16	1	8.37	4.27	13.2	91.8	180	0	6.67	1.26	0.43	0	0.01	2.4	0.03	0.0303	32	7.645134914	1.1	0.5	0.2	13.76	50.2	152.4	7.9	3.274559194	4.761904762	5.293650794
1849	0	677	0	4	M	82	18	1	9.5	4.43	14	91.4	175	0	7.44	1.38	0.63	0.03	0.02	3.6	0.05	0.0306	32.5	18.54808058	1.2	0.6	0.2	32.46	50.3	149.4	10.9	1.423487544	6.52173913	5.391304348
1850	0	678	1	0	M	88	7	1	8.32	4.36	13.7	96.3	265	0	6.58	1.12	0.61	0	0.01	6.3	0.07	0.0227	29.9	2.370259481	0.7	-2	0.2	6.28	49.6	160.4	7.1	9.594095941	1.785714286	5.875
1851	0	678	0	1	M	88	8	1	8.05	4.32	13.3	94.7	275	0	6.95	0.57	0.52	0	0.01	15.8	0.09	0.0251	29.3	2.370408961	0.8	-2.2	0.3	6.52	51.2	158.7		10	3.50877193	12.19298246
1852	0	678	0	3	M	88	10	1	10.61	3.99	12.3	95.5	336	0	8.85	1	0.72	0.02	0.02	7.0	0.07	0.0235	27.6	2.65905062	0.7	-4.3	0.4	8.93	49.3	154.4	11	7.110438729	2	8.85
1853	0	679	1	0	F	62	10	0	5.22	4.92	14.4	87.8	193	0	3.6	1.36	0.25	0	0.01	1.5	0.02	0.0399	27.9	4.545454545	1.7	-1.9	0.1	8.77	47.3	153.2		11.79039301	7.352941176	2.647058824
1854	0	679	0	2	F	62	12	0	5.34	4.56	13.4	87.5	204	0	3.31	1.75	0.24	0.02	0.02	3.4	0.06	0.031	29.6	4.786379698	1.8	-0.7	0.1	9.76	49	150.4		9.865470852	6.857142857	1.891428571
1855	0	680	1	0	M	72	5	0	17.54	4.23	12.8	89.1	227	0.01	16.79	0.39	0.3	0.03	0.03	53.8	0.21				1				47.6	153.9	12.8	8.992805755	5.128205128	43.05128205
1856	0	680	0	2	M	72	7	0	11.68	4.32	13	92.4	306	0	10.66	0.65	0.33	0.02	0.02	23.1	0.15	0.022	29.9	3.276783639	0.7	-1.2	0.3	10.03	50.6	150.1	13.8	3.311258278	4.615384615	16.4
1857	0	681	1	0	M	68	9	0	4.59	4.66	13.6	85.8	168	0.01	3.28	0.83	0.46	0.01	0.01	1.2	0.01	0.0219	31.5	6.701274186	2.2	1.5	0.1	11.26	50.8	160.7	7.2	5.647058824	3.614457831	3.951807229
1858	0	681	0	2	M	68	11	0	4.83	4.96	14.2	85.9	225	0	3.01	1.28	0.48	0.05	0.01	1.6	0.02	0.0218	32.5	5.668604651	2.5	2.7	0.2	12.75	50.3	155.4	10.9	3.317535545	5.46875	2.3515625
1859	0	682	1	0	F	63	7	0	15.62	4.42	13.2	91.4	312	0	13.53	1.04	1.02	0	0.03	23.1	0.24	0.042	31.1	4.339440694	1.1	0.9	0.1	13.54	47.8	151.1	13.5	2.306079665	2.884615385	13.00961538
1860	0	682	0	1	F	63	8	0	10.36	4	11.9	90.3	327	0	9.27	0.72	0.3	0.02	0.05	33.3	0.24	0.0424	28.8	3.613732182	1.1	-1.4	0.6	11.82	46.6	150.7	9.7	1.773049645	1.388888889	12.875
1861	0	682	0	3	F	63	10	0	7.73	3.88	11.5	89.9	467	0	5.43	1.29	0.81	0.14	0.06	20.2	0.26	0.0365	29	2.889721962	1.2	-1	0.2	13.50	49.4	152.8	14.7	0.423131171	1.550387597	4.209302326
1862	0	683	1	0	F	44	6	0	3.95	4.87	14.3	89.3	215	0	2.61	0.99	0.33	0.01	0.01	1.0	0.01	0.0336	30.4	4.902322153	1	0.6	0.1	10.54	49.5	155.4	13.1	0.64516129	3.03030303	2.636363636
1863	0	683	0	5	F	44	11	0	5.44	4.69	13.8	89.1	340	0	3.35	1.58	0.47	0.03	0.01	2.5	0.04	0.0338	30.1	3.602542972	1	0.3	0.1	12.25	48.6	148.9		1.822323462	8.860759494	2.120253165
1864	0	683	0	6	F	44	12	0	4.34	4.55	13.2	87.9	346	0	2.16	1.74	0.36	0.06	0.02	1.7	0.03	0.03	30.3	4.096696808	1.1	0	0.1	14.17	46.9	148.6	12.6	2.976190476	5.747126437	1.24137931
1865	0	683	0	7	F	44	13	0	5.22	4.42	12.8	88.7	381	0	2.65	2.02	0.43	0.1	0.02	2.5	0.05	0.0332	31	3.485961937	0.9	1.4	0.2	13.28	46.1	147.4	15.3	2.624671916	5.940594059	1.311881188
1866	0	684	1	0	F	69	2	0	5.97	4.89	15.2	89.6	228	0	4.98	0.42	0.56	0	0.01	14.3	0.06	0.0587	31.6	2.842105263	1	0.3	0.05	6.48	48.1	160.7	11.9	4.230769231	0	11.85714286
1867	0	684	0	3	F	69	5	0	3.25	4.42	13.8	89.1	198	0	2.78	0.3	0.16	0	0.01	16.7	0.05	0.0407	29.9	5.009208103	1	-1.2	0.1	9.92	51.3	158.7	13.3	4.347826087	3.333333333	9.266666667
1868	0	685	1	0	M	75	10	1	6.52	5.1	15.1	86.5	268	0	5.16	0.77	0.58	0	0.01	6.5	0.05	0.0347	30.2	7.089655172	2.7	-0.1	0.1	19.00	45.1	151.7	13	0.756143667	7.792207792	6.701298701
1869	0	685	0	1	M	75	11	1	8.4	4.9	14.3	89.2	275	0	7.09	0.67	0.62	0.01	0.01	9.0	0.06	0.0338	29	4.661885246	1.9	-0.7	0.2	12.82	47.9	152	16.4	2.090592334	10.44776119	10.58208955
1870	0	685	0	3	M	75	13	1	11.64	4.61	13.5	89.2	356	0.01	9.98	0.68	0.88	0.08	0.02	11.8	0.08	0.0341	28.9	7.61567412	2	-0.8	0.3	27.11	47.9	150.4	19.1	1.113861386	13.23529412	14.67647059
1871	0	686	1	0	M	79	14	1	8.84	5.12	15.2	89.1	245	0	6.39	1.41	0.95	0.08	0.01	3.5	0.05	0.0471	30	7.362741987	1.8	-0.1	0.6	18.04	45	147.2	9.2	1.545253863	3.546099291	4.531914894
1872	0	686	0	1	M	79	15	1	8.27	4.75	13.9	89.1	187	0	5.98	1.18	1.01	0.09	0.01	5.1	0.06	0.0485	31.4	7.538635507	1.6	0.8	0.3	14.10	45.8	149.3	9.3	1.457399103	2.542372881	5.06779661
1873	0	686	0	2	M	79	16	1	11.61	4.91	14.4	90.4	191	0	9.85	0.83	0.83	0.09	0.01	14.5	0.12	0.0619	30.6	6.099815157	1.5	0.5	0.4	11.65	47	149.9	12	1.314060447	2.409638554	11.86746988
1874	0	686	0	4	M	79	18	1	16.71	4.65	13.9	91	186	0	15.1	0.73	0.87	0	0.01	32.9	0.24	0.0511	29.7	6.785137318	1.6	-0.5	0.3	12.62	51	154.8	9.6	1.228501229	2.739726027	20.68493151
1875	0	687	1	0	M	77	20	1	12.79	3.62	11.7	99.4	634	0	10.77	1.15	0.71	0.12	0.04	8.7	0.1	0.0373	30.1	5.951317552	0.6	-2.8	0.4	37.73	46.5	151	14.8	1.203007519	6.086956522	9.365217391
1876	0	687	0	3	M	77	23	1	16.7	3.18	10.4	98.7	541	0.01	14.62	1.12	0.88	0.04	0.04	16.1	0.18	0.0493	32.3	3.830041891	0.5	-0.9	0.3	20.72	49.1	155	14.3	2.618453865	2.678571429	13.05357143
1877	0	688	1	0	M	67	14	0	6.76	5.16	15.1	89.5	111	0	5.65	0.65	0.45	0	0.01	3.1	0.02	0.0289	30.4	11.56968877	2.8	0.8	0.5	12.84	46.2	148.5	18.5	2.43902439	9.230769231	8.692307692
1878	0	688	0	1	M	67	15	0	5.94	4.91	14.5	90.4	111	0	4.8	0.71	0.42	0	0.01	2.8	0.02	0.028	30	8.21529745	2.5	0.4	0.4	9.12	46.7	147.1	14.1	4.95049505	5.633802817	6.76056338
1879	0	689	1	1	M	87	3	0	4.65	3.73	11.7	95.2	149	0	3.71	0.47	0.47	0	0	4.3	0.02	0.0421	33.3	3.719806763	1.1	1.6	0.2	5.54	50.9	158.1	17	5.365853659	4.255319149	7.893617021
1880	0	689	0	3	M	87	5	0	2.8	3.66	11.4	95.6	135	0	2.17	0.5	0.1	0.02	0.01	4.0	0.02	0.0403	28.6	3.968668407	1	-3	0.3	5.36	52.6	155.8	12	21.21212121	2	4.34
1881	0	690	1	0	F	85	2	1	5.35	4.3	12.8	91.2	217	0	4.1	0.74	0.5	0	0.01	5.4	0.04	0.0331	30.1	4.06504065	1.8	-0.3	0.2	8.82	45	154.8	9.5	3.870967742	4.054054054	5.540540541
1882	0	690	0	2	F	85	4	1	4.44	4.14	12.4	93.5	200	0	3.37	0.78	0.28	0	0.01	12.8	0.1	0.0306	28.6	4.064719811	1.6	-1	0.4	8.13	50.1	155.5		10.07751938	3.846153846	4.320512821
1883	0	691	1	1	M	64	11	0	4.48	4.33	13.8	90.8	217	0	2.19	1.53	0.73	0.02	0.01	0.7	0.01	0.0333	34.4	2.031602709	0.7	2.7	0.1	4.41	50.5	155.6	10.5	3.736920777	1.307189542	1.431372549
1884	0	691	0	2	M	64	12	0	4.35	4.08	13	92.2	238	0	2.61	1.01	0.67	0.05	0.01	3.0	0.03	0.0269	33.8	2.007791429	0.6	2.1	0.2	4.78	52.9	152.9	11.9	3.600654664	2.97029703	2.584158416
1885	0	692	1	0	F	67	7	0	5.24	4.71	14.4	90.9	217	0	3.45	1.42	0.36	0	0.01	1.4	0.02	0.0297	31.6	2.739262766	0.8	0.3	0.2	5.94	47.1	157.9	8.5	1.457725948	4.929577465	2.429577465
1886	0	692	0	2	F	67	9	0	4.68	4.36	13.5	90.6	243	0	3.52	0.79	0.34	0.02	0.01	2.5	0.02	0.0314	32	2.221516979	0.8	0.9	0.1	5.40	49.1	156.7	10.1	2.173913043	6.329113924	4.455696203
1887	0	693	1	0	F	58	10	1	5.3	4.45	13.8	89.9	236	0	3.77	1.23	0.29	0	0.01	0.8	0.01	0.0223	33.1	3.428892636	0.8	1	0.1	8.09	49.9	153		3.515625	2.43902439	3.06504065
1888	0	693	0	3	F	58	13	1	10.09	4.56	14.2	88.8	322	0	8.95	0.8	0.32	0.01	0.01	13.8	0.11	0.036	32.7	3.854210306	1	0.6	0.1	12.41	52.3	149.3	15	10.13986014	10	11.1875
1889	0	694	1	0	F	56	8	0	9.66	3.9	11.8	88.7	268	0	7.18	2.14	0.31	0	0.03	3.3	0.07	0.0355	26.4	2.321187584	1.2	-4.7	0.1	6.22	47.8	149.1	6.5	1.811594203	3.738317757	3.355140187
1890	0	694	0	1	F	56	9	0	8.84	3.85	11.5	90.4	256	0	6.79	1.76	0.24	0.02	0.03	5.1	0.09	0.0331	27.2	2.363250133	1	-3.9	0.1	6.05	49	147.5	9.1	6.392694064	5.113636364	3.857954545
1891	0	694	0	3	F	56	11	0	8.25	3.93	11.8	93.4	314	0	5.21	2.51	0.34	0.17	0.02	2.8	0.07	0.0204	24.9	1.743544471	0.8	-5	0.6	5.47	48	148		2.572347267	7.96812749	2.075697211
1892	0	695	1	3	M	66	8	1	14.93	2.91	9.6	104.5	163	0.09	14.2	0.36	0.27	0	0.1	261.1	0.94	0.0314	27.7	10.83704003	2.1	-4.7	1.9	17.66	45.9	139.7		11.25	8.333333333	39.44444444
1893	0	695	0	4	M	66	9	1	20.81	2.82	9.1	106	165	0.16	19.77	0.6	0.32	0	0.12	233.3	1.4	0.0319	29.5	12.14574899	1.8	-3	1.8	20.04	46.7	136.7		24.39862543	10	32.95
1894	0	695	0	5	M	66	10	1	30.25	2.98	9.8	106.7	199	0.2	28.58	1.04	0.5	0.01	0.12	215.4	2.24	0.0265	27.8	13.20434487	2.2	-4.2	2.2	26.28	43.2	133.8		26.13390929	10.57692308	27.48076923
1895	0	695	0	6	M	66	11	1	39.28	2.69	9	110.4	231	0.49	36.57	2.01	0.53	0	0.17	184.1	3.7	0.0256	27.5	13.09754076	2	-4.2	2.4	30.26	45.9	133.3		27.6371308	14.4278607	18.19402985
1896	0	695	0	7	M	66	12	1	36.48	2.65	8.8	106	195	0.48	34.59	1.26	0.46	0	0.17	187.3	2.36	0.0244	27	16.59797677	2.6	-4.5	3.2	32.37	45.4	133	12.7	16.70644391	5.555555556	27.45238095
1897	0	696	1	3	F	49	14	1	9.61	3.99	11.4	92	418	0.01	7	0.92	1.6	0.02	0.07	69.6	0.64	0.0654	30.5	3.7	1	2.3	0.3	15.50	43.7	140.7	3.3	3.763789747	0	7.608695652
1898	0	696	0	3	F	49	16	1	14.22	3.94	11.1	91.4	494	0.02	11.05	1.1	1.84	0.19	0.04	50.9	0.56	0.1076	30	3.9	1.4	1.7	0.3	19.30	45.5	142	11.8	0.702576112	2.727272727	10.04545455
1899	0	696	0	3	F	49	16	1	9.68	3.89	11.1	91.8	420	0	7.06	1.35	1.12	0.12	0.03	37.8	0.51	0.0755	31.2	3.8	1.1	3.1	0.2	16.00	44.3	141.2	8.9	0.293542074	4.444444444	5.22962963
1900	0	696	0	3	F	49	18	1	22.37	3.39	9.6	93.2	505	0.01	18.19	1.03	2.91	0.2	0.04	75.7	0.78	0.0888	28	4.7	1.3	0.1	0.5	23.70	44.9	146.3	11.7	0.480769231	1.941747573	17.66019417
1901	0	696	0	20	F	49	34	1	13.01	2.77	7.7	94.9	542	0.02	9.62	1.62	1.05	0.68	0.04	19.8	0.32	0.1213	29	3.5	1.4	1.7	1.5	19.00	46.2	145.1	7.4	0.104712042	0.617283951	5.938271605
1902	0	696	0	21	F	49	35	1	12.17	2.72	7.5	96.3	521	0	8.95	1.7	1.05	0.44	0.03	27.1	0.46	0.1414	28.6	2.617046819	1.2	1.8	2.2	13.63	46.9	147.9	8.2	0.620475698	1.176470588	5.264705882
1903	0	696	0	22	F	49	36	1	13.57	2.83	7.8	96.1	552	0.02	9.86	1.96	1.34	0.37	0.04	17.3	0.34	0.1789	29.1	2.116463985	1.3	2.3	2.4	11.68	46.4	148.3	8.7	0.811030008	1.020408163	5.030612245
1904	0	696	0	23	F	49	37	1	10.44	2.7	7.5	96.7	484	0	7.46	1.66	1.1	0.2	0.02	10.2	0.17	0.1688	29.3	2.816901408	1.4	2.7	2.4	13.63	41.9	144.1	6	1.029866117	0.602409639	4.493975904
1905	0	696	0	24	F	49	38	1	10.01	2.74	7.6	96	506	0	7.09	1.62	1.1	0.17	0.03	6.8	0.11	0.1743	29.9	1.581934549	1.3	3.2	2.3	8.00	43.2	147.2	6.2	0.308959835	0.617283951	4.37654321
1906	0	697	1	2	M	61	4	0	9.34	3.09	10.9	103.2	203	0											0.2
1907	0	697	0	3	M	61	5	0	8.48	2.22	7.9	101.8	138	0											0.2
1908	0	698	1	20	M	56	28	1	4.81	2.51	7.4	99.2	128	0.03	3.2	1.16	0.37	0.06	0.02	17.2	0.2	0.2229	32.8	2.7	2.8	4	1	3.50	49.2	146.5	9.5	0	0	2.75862069
1909	0	698	0	21	M	56	29	1	5.9	2.53	7.3	99.6	94	0.03	3.92	1.26	0.58	0.11	0.03	9.5	0.12	0.17	33	2.941176471	2.2	5	3.1	2.76	49.9	149.9	5.6	0.192678227	0.793650794	3.111111111
1910	0	698	0	22	M	56	30	1	8.47	2.21	6.6	100.5	112	0.04	6.31	1	0.99	0.13	0.04	10.0	0.1	0.1277	34	3.103448276	2	5.3	2	3.48	53	151	4	0.575373993	0	6.31
1911	0	698	0	23	M	56	31	1	5.57	2.33	6.8	100	110	0.02	3.72	1.08	0.62	0.12	0.03	8.3	0.09	0.1212	33.2	3.998073218	1.8	4.5	1.9	4.40	52.3	151.6	4.6	0.899280576	0.925925926	3.444444444
1912	0	698	0	24	M	56	32	1	5.56	2.38	7	98.7	111	0.03	3.61	1.21	0.56	0.15	0.03	5.0	0.06	0.1307	33.3	3.146303094	1.7	4.6	1.9	3.49	52	152.3	10.7	0.197628458	2.479338843	2.983471074
1913	0	698	0	25	M	56	33	1	4.13	2.34	7	98.7	103	0.02	2.75	0.97	0.27	0.11	0.03	5.2	0.05	0.1175	33.2	2.297592998	1.2	4.1	1.5	2.37	50.5	154.6	10.3	0.836820084	2.06185567	2.835051546
1914	0	698	0	26	M	56	34	1	4.68	2.5	7.5	96.4	107	0	3.1	1.13	0.31	0.12	0.02	5.3	0.06	0.1188	33.8	2.028830753	1.4	4.2	1.2	2.17	50.4	153	13.3	0.694444444	2.654867257	2.743362832
1916	0	700	1	0	M	62	2	0	6.14	3.03	9.5	95.7	105	0	5.32	0.71	0.11	0	0	8.5	0.06	0.073	30.8	2.729044834	0.8	-1.2	0.4	2.87	47.9	156.2	4.2	0	0	7.492957746
1928	0	703	1	2	F	59	9	1	11.51	3.18	9.2	92.8	364	0	9.01	1.22	0.79	0.43	0.06	41.0	0.5	0.0165	24.2	4.1	1.8	-4.3	0.5	14.90	59.4	149	13.1	1.388888889	1.639344262	7.385245902
1929	0	703	0	3	F	59	10	1	12.61	2.77	7.8	93.5	381	0.02	10.11	1.18	0.85	0.41	0.06	69.5	0.82	0.0086	24.5	3.628117914	1.6	-3	1.9	13.82	56.9	149.5	19.5	4.441624365	7.627118644	8.56779661
1930	0	703	0	4	F	59	11	1	18.38	2.87	8	93.7	469	0.02	16.01	1.22	0.8	0.28	0.07	106.6	1.3	0.0092	23.4	2.876503941	1.9	-3.3	3	13.49	58.2	151.2	21.3	4.644808743	9.836065574	13.12295082
1931	0	703	0	5	F	59	12	1	16.03	2.82	7.9	92.6	421	0.05	14.08	0.97	0.67	0.25	0.06	118.6	1.15	0.009	25.2	3.952901598	2.3	-2.8	1.1	16.64	55.3	155.4	15.5	2.306425041	6.18556701	14.51546392
1932	0	703	0	6	F	59	13	1	16.97	2.69	7.5	92.6	501	0.07	15.02	1.1	0.64	0.14	0.07	95.5	1.05	0.0113	23	3.491069357	2.3	-4.5	1.3	17.49	55.1	155.9	17.3	3.281519862	6.363636364	13.65454545
1933	0	703	0	7	F	59	14	1	15.51	2.75	7.8	93.5	452	0.12	13.24	1.15	0.8	0.24	0.08	87.0	1	0.0198	21.3	4.478328731	2	-6.5	1.4	20.24	56.7	154.8	18.3	2.04359673	5.217391304	11.51304348
1934	0	703	0	8	F	59	15	1	17.83	2.74	7.7	93.8	425	0.11	15.17	1.38	0.94	0.28	0.06	71.0	0.98	0.0244	19.4	4.744036451	2.2	-7.9	2	20.16	56.2	154.2	18.1	1.754385965	4.347826087	10.99275362
1935	0	704	1	2	M	72	12	1	8.11	4.2	11.9	90.7	186	0.01	5.68	1.02	1.12	0.28	0.01	13.7	0.14	0.0428	23.8	10.5	1.7	-4.5	0.2	19.50	39.3	139.3		8.454810496	1.960784314	5.568627451
1936	0	704	0	3	M	72	13	1	10.66	4.26	11.7	92	244	0	7.63	1.23	1.18	0.59	0.03	31.7	0.39	0.0417	24.3	12.03438395	1.6	-3.8	0.4	29.36	40.8	140.4		7.721280603	5.691056911	6.203252033
1937	0	704	0	4	M	72	14	1	7.48	4.04	11.2	92.3	266	0	4.67	1.37	0.97	0.44	0.03	16.1	0.22	0.0242	24.4	7.92106726	1.5	-3.3	1	21.07	42	137		20.52980132	5.839416058	3.408759124
1938	0	704	0	5	M	72	15	1	4.19	3.7	10.2	91.9	202	0.02	2.14	0.96	0.77	0.3	0.02	12.5	0.12	0.0166	24.8	7.096774194	1.7	-2.5	1.4	14.34	41.3	135.1	14.6	22.04610951	4.166666667	2.229166667
1939	0	704	0	6	M	72	16	1	4.14	3.61	9.9	92	188	0.03	2.14	1.01	0.67	0.3	0.02	10.9	0.11	0.0166	26.7	7.831762146	1.6	-0.4	1.4	14.72	40.1	137.2		15.78947368	3.96039604	2.118811881
1940	0	704	0	7	M	72	17	1	4.19	3.67	10	91.8	175	0.06	2.6	0.81	0.53	0.22	0.03	24.7	0.2	0.0308	25.4	7.583454282	1.8	-0.9	2.7	13.27	41.7	140.4	17.3	9.730848861	7.407407407	3.209876543
1941	0	704	0	8	M	72	18	1	4.44	3.62	9.9	91.4	169	0.07	2.77	1.03	0.43	0.18	0.03	31.1	0.32	0.0427	23.5	9.298052187	1.9	-2.3	3.2	15.71	42.4	142	16.5	3.100775194	2.912621359	2.689320388
1942	0	705	1	1	F	54	8	1	14.12	2.93	8.8	95.2	646	0	11.68	1.42	0.51	0.48	0.03	23.2	0.33	0.0419	27.6	2.565019215	0.9	-3.1	0.4	16.57	45.1	151.1	13.4	2.725366876	2.112676056	8.225352113
1943	0	705	0	3	F	54	10	1	13.49	2.84	8.5	94.4	652	0.04	10.95	1.49	0.7	0.32	0.03	41.6	0.62	0.046	27.4	2.234870679	0.9	-3	0.6	14.57	45.8	153.1	16.1	1.877934272	2.013422819	7.348993289
1944	0	705	0	4	F	54	11	1	12.6	2.73	8.1	93.8	700	0.04	9.95	1.54	0.78	0.3	0.03	51.3	0.79	0.05	28.4	2.330237028	1.2	-1.9	0.9	16.31	45.9	154.1	13.6	1.754385965	1.298701299	6.461038961
1945	0	705	0	5	F	54	12	1	13.74	2.7	8	96.3	752	0.03	10.52	1.83	1	0.34	0.05	35.5	0.65	0.068	29	2.243004311	0.9	-1.2	0.9	16.87	46.9	154.3	16.4	1.644736842	1.639344262	5.74863388
1946	0	705	0	6	F	54	13	1	13.77	2.8	8.2	95.4	841	0.02	10.58	1.67	1.07	0.42	0.03	32.3	0.54	0.0862	26.8	2.250195669	1	-3.3	1	18.92	47.6	155.4	15.6	0.625651721	1.19760479	6.335329341
1947	0	706	1	5	M	68	14	0	3.02	4.46	12	85.4	200	0											4
1948	0	707	1	3	M	42	8	0	3.08	5.12	14.3	82.8	113	0	2.25	0.71	0.12	0	0	1.4	0.01	0.0251	29	4.194857916	3.6	-0.5	0.2	4.74	47.2	153.6	1.4	1.834862385	0	3.169014085
1949	0	707	0	5	M	42	10	0	4.83	4.95	13.8	83	137	0											3.5
1950	0	708	1	0	M	58	8	0	8.91	4.76	14	83.2	258	0	7.43	1.02	0.44	0.01	0.01	5.9	0.06	0.0466	20.6	8.661839635	3.9	-9.3	1.7	22.35	45.4	157.7	5.9	0.492610837	2.941176471	7.284313725
1951	0	709	1	0	M	74	11	1	9.33	4.94	14.1	89.1	315	0	8.31	0.51	0.5	0	0.01	9.8	0.05	0.0301	27	5.804111245	2.2	-2.6	0.4	18.28	49.3	148.2	9.8	1.559020045	7.843137255	16.29411765
1952	0	709	0	1	M	74	12	1	9.05	4.56	13	88.2	325	0	7.95	0.6	0.49	0	0.01	8.3	0.05	0.0237	28.5	5.613660619	2.4	-1.2	0.2	18.24	49.1	148	13.3	2.07852194	5	13.25
1953	0	709	0	2	M	74	13	1	5.28	4.35	12.4	89	303	0	3.99	0.81	0.45	0	0.03	11.1	0.09	0.0257	28.7	4.700378703	1.9	-0.8	0.4	14.24	48.9	149.4	9.9	1.682692308	4.938271605	4.925925926
1954	0	709	0	3	M	74	14	1	4.84	4.28	11.8	88.6	322	0	3.71	0.63	0.47	0	0.03	42.9	0.27	0.0257	28.6	5.073684211	2	-0.8	0.5	16.34	50.6	150.9	12.7	1.392111369	7.936507937	5.888888889
1955	0	709	0	4	M	74	15	1	6.33	4.38	12.6	88.6	346	0.03	4.93	0.76	0.57	0.03	0.04	47.4	0.36	0.039	29.5	5.751947274	1.8	0	0.7	19.90	50.6	148.6	14.5	0.984251969	6.578947368	6.486842105
1956	0	710	1	1	M	68	6	1	8.51	4.49	12.8	92.4	283	0.03	7	1.12	0.36	0.02	0.01	8.0	0.09	0.0332	27.1	4.919152813	1.4	-2.5	0.3	13.92	45.1	140.7	5.4	2.507836991	1.785714286	6.25
1957	0	710	0	1	M	68	6	1	9.77	4.16	12	90.6	285	0.05	8.54	0.83	0.37	0.02	0.01	24.1	0.2	0.0291	26.1	5.497835498	1.6	-3.3	1	15.67	45.6	141.4	13.3	10.71428571	6.024096386	10.28915663
1958	0	710	0	2	M	68	7	1	9.71	3.82	11	94	260	0.1	8.62	0.57	0.49	0.01	0.02	50.9	0.29	0.0256	24.3	4.735114862	1.2	-3.8	2.5	12.31	45.9	141.5		16.01830664	17.54385965	15.12280702
1959	0	710	0	4	M	68	9	1	6.4	3.4	9.8	93.8	233	0.07	5.42	0.49	0.24	0.23	0.02	73.5	0.36	0.0218	21.1	6.31786772	1.3	-7.1	2.2	14.72	51.5	147.2	16.3	10.50228311	8.163265306	11.06122449
1960	0	711	1	3	F	73	9	1	7.6	3.39	11	99.1	186	0	6.88	0.47	0.15	0.07	0.03	8.5	0.04	0.0203	23.9	4.569968777	0.4	-8.6	1.4	8.50	59.3	151.7	31.9	13.07692308	8.510638298	14.63829787
1961	0	711	0	3	F	73	9	1	5.51	2.86	9.2	101.4	133	0	4.84	0.45	0.13	0.08	0.01	11.1	0.05	0.0143	22.9	5.042372881	0.4	-9	2.2	6.71	59	151.1	26.7	22.88135593	6.666666667	10.75555556
1962	0	711	0	4	F	73	10	1	6.8	2.95	9.9	101.7	175	0	5.87	0.63	0.16	0.11	0.03	12.7	0.08	0.0156	25.2	7.649918963	0.4	-6.6	2.2	13.39	58	152.9	31.7	10.66666667	7.936507937	9.317460317
1963	0	712	1	0	F	62	10	1	5.23	3.48	11.5	98.9	355	0	3.79	1	0.42	0.01	0.01	20.0	0.2	0.0143	34.6	6.437933693	0.8	1.2	0.2	22.85	52.3	150.7	11	2.127659574	8	3.79
1964	0	712	0	1	F	62	11	1	5.77	3.4	11.4	102.4	347	0	4.12	1.27	0.34	0.03	0.01	20.5	0.26	0.0146	33.9	5.385709207	0.5	0.5	0.4	18.69	53.4	151.5	7.9	3.8585209	4.724409449	3.244094488
1965	0	712	0	2	F	62	12	1	8.21	3.57	12.2	105.9	433	0.03	6.7	1.15	0.29	0.05	0.02	13.0	0.15	0.0243	31.9	5.696391291	0.5	-1.4	0.5	24.67	57.2	152.1	11.3	13.49206349	5.217391304	5.826086957
1966	0	712	0	3	F	62	13	1	7.76	3.43	11.8	107.6	429	0.03	6.72	0.78	0.19	0.06	0.01	12.8	0.1	0.0326	25.9	6.319385141	0.5	-6.9	1	27.11	58.3	151.5	10.3	22.34636872	3.846153846	8.615384615
1967	0	712	0	4	F	62	14	1	7.87	3.12	11	108.3	323	0.02	6.64	0.73	0.31	0.18	0.01	20.5	0.15	0.0225	23.8	6.727205337	0.4	-8.8	1.1	21.73	57.1	152.7		14.07942238	2.739726027	9.095890411
1968	0	713	1	0	F	18	4	0	11.86	4.18	11.1	87.3	334	0	8.58	1.84	1.42	0	0.02	2.2	0.04	0.0523	29.2	4.405670665	1.4	1.7	0.2	14.71	53.2	156.4	3.3	1.00931677	0.543478261	4.663043478
1969	0	714	1	3	M	83	6	0	6.55	5.03	15.6	93.2	148	0	4.76	0.89	0.86	0.01	0.03	2.2	0.02	0.0367	33.2	5.864661654	1.2	0.8	0.1	8.68	48.5	156.5	6.7	0.131752306	2.247191011	5.348314607
1970	0	715	1	1	M	74	12	0	18.72	4.22	11.9	87.4	331	0	15.41	1.76	1.48	0.02	0.05	18.8	0.33	0.0971	28.1	3.641267701	2.5	-1.8	0.3	12.05	45.8	153.3	7.4	0.600150038	2.840909091	8.755681818
1971	0	716	1	3	M	77	11	0	3.72	2.73	8.6	99.6	94	0	2.77	0.85	0.09	0.01	0	3.5	0.03	0.0658	28.6	3.9	0.5	-3.7	0.3	3.70	49.5	156.7	3.5	1.19047619	0	3.258823529
1972	0	717	1	0	M	61	7	1	14.04	4.73	14.7	88.2	257	0	12.57	0.97	0.47	0	0.03	10.3	0.1	0.0657	30.1	3.282464728	0.9	-2.1	0.1	8.44	47.2	155.8	9.3	0.70754717	4.12371134	12.95876289
1973	0	717	0	0	M	61	7	1	14.23	4.22	13.2	90.3	236	0.02	12.94	0.59	0.68	0	0.02	30.5	0.18	0.0506	30.7	3.780821918	0.5	-1.7	0.1	8.92	52	155.2	13.6	2.53164557	5.084745763	21.93220339
1974	0	717	0	1	M	61	8	1	15.31	4.36	13.6	92.2	240	0.03	13.97	0.62	0.59	0.06	0.07	30.6	0.19	0.0571	29.9	2.768346827	0.5	-2.3	0.1	6.64	53.4	149.5	12.9	4.414587332	4.838709677	22.53225806
1975	0	717	0	2	M	61	9	1	9.29	4.05	12.5	94.6	253	0	7.66	0.86	0.47	0.21	0.09	17.4	0.15	0.0494	30.4	3.787690007	0.5	-1.3	0.5	9.58	54.1	146.9	16.3	10.82352941	6.976744186	8.906976744
1976	0	718	1	0	M	61	5	1	13.87	4.06	12.7	97.8	254	0	12.24	1.05	0.43	0.1	0.05	61.0	0.64	0.0353	32.5	6.058857473	0.5	0.3	0.1	15.39	49.1	147.5	11.4	8.355091384	8.571428571	11.65714286
1977	0	718	0	1	M	61	6	1	15.61	3.87	12.3	98.4	299	0.02	14.05	0.96	0.48	0.05	0.07	103.1	0.99	0.0364	31	5.962059621	0.5	-1.2	0.5	17.83	52	148.3		6.993006993	15.625	14.63541667
1978	0	718	0	2	M	61	7	1	15.39	3.87	12.3	99.7	278	0.02	13.32	1.19	0.57	0.22	0.09	95.8	1.14	0.0445	29.8	6.04270786	0.6	-1.9	0.7	16.80	50.2	149.4	9.2	4.448742747	5.042016807	11.19327731
1979	0	719	1	0	F	69	16	0	5.27	4.61	14.4	100.2	185	0	3.99	0.95	0.32	0	0.01	7.4	0.07	0.0295	30.5	6.255044391	0.2	-1.9	0.2	11.57	48.2	155.1	5.3	2.135231317	1.052631579	4.2
1980	0	720	1	0	M	74	7	0	2.89	4.48	12.9	87.3	160	0	1.94	0.6	0.33	0.01	0.01	6.7	0.04	0.0233	27	7.681365576	1.3	-3.4	0.4	12.29	46.3	155.4	1.7	1.346801347	0	3.233333333
1981	0	721	1	0	F	76	13	1	15.93	3.48	10	97.1	433	0	13.21	1.62	0.76	0.29	0.05	42.0	0.68	0.0191	21.4	2.705515088	1.3	-6.4	2.3	11.71	50	143.6	13.6	1.560283688	5.555555556	8.154320988
1982	0	721	0	1	F	76	14	1	15.95	3.46	9.8	93.6	439	0.03	12.86	1.91	0.92	0.22	0.04	41.4	0.79	0.0197	23.2	3.039803708	1.6	-5.1	1.9	13.34	50.9	143.8	11.5	1.854140915	3.141361257	6.732984293
1983	0	722	1	0	M	61	8	0	7.23	4.44	12.8	82.4	230	0	5.8	0.91	0.43	0.07	0.02	4.4	0.04	0.0306	29.5	6.346483705	2.8	-0.7	0.1	14.60	45.1	150.4	8.8	3.291139241	6.593406593	6.373626374
1984	0	723	1	0	M	70	9	1	10.22	3.46	10.7	95.1	165	0	9.33	0.48	0.25	0.13	0.03	31.3	0.15	0.0125	29.1	8.540176693	0.5	-2.4	0.4	14.09	54.6	152.7	10.4	14.35185185	4.166666667	19.4375
1985	0	723	0	1	M	70	10	1	13.84	3.54	10.9	97.7	197	0	12.54	0.67	0.29	0.3	0.04	68.7	0.46	0.0163	27.8	6.820428336	0.4	-3.3	1.1	13.44	56.6	151.5	11.9	12.64367816	2.985074627	18.71641791
1986	0	724	1	1	M	77	7	1	3.4	3.39	9.5	87.9	225	0	2.51	0.6	0.15	0.13	0.01	6.7	0.04	0.0203	24.8	2.324309543	2.8	-3.7	0.9	5.23	47.5	154.3	10	5.263157895	6.666666667	4.183333333
1987	0	724	0	1	M	77	7	1	3.97	3.59	10	87.2	231	0	2.91	0.62	0.24	0.19	0.01	6.5	0.04	0.0172	23.7	2.913150014	3	-4.4	2.4	6.73	48.9	153.4	11.3	3.738317757	6.451612903	4.693548387
1988	0	725	1	0	M	69	9	1	6.89	3.84	11.7	95.1	278	0	4.95	1.4	0.39	0.13	0.02	4.3	0.06	0.0242	29.3	5.461483425	0.8	-2.6	0.3	15.18	50.1	148.9	7.9	0.847457627	3.571428571	3.535714286
1989	0	726	1	0	M	54	6	1	9.8	4.09	12.1	88.5	190	0	8.29	1.25	0.25	0.01	0	7.2	0.09	0.0331	29.5	3.984194929	1.8	-1	0.3	7.57	52.4	153.3	8	6.986899563	5.6	6.632
1991	0	728	1	0	F	67	11	0	6.02	3.26	8.5	89	322	0	3.76	1.64	0.59	0.02	0.01	1.2	0.02	0.0147	20.6	3.536493604	5.1		5.3	11.39	44.7	146.7	2.4	0.388349515	1.219512195	2.292682927
1992	0	729	1	0	F	74	11	1	12.57	4.84	13.9	90.7	235	0	8.99	2.61	0.87	0.06	0.04	2.7	0.07	0.0324	30.7	3.279631761	1.2	0.9	0.1	7.71	44.5	145.7	9.6	2.668360864	7.279693487	3.444444444
1993	0	729	0	0	F	74	11	1	11.97	4.64	13.4	91.4	238	0	8.68	2.36	0.81	0.07	0.05	5.9	0.14	0.0334	30.4	3.715170279	1.2	0.5	0.2	8.84	47.5	144.9	9.7	3.562005277	6.355932203	3.677966102
1994	0	730	1	0	M	53	4	1	8.57	4.04	11.9	89.4	249	0	7.59	0.64	0.33	0	0.01	15.6	0.1	0.0137	32.7	2.904006453	1.9	2.2	0.3	7.23	52.1	153.2	21.9	4.666666667	15.625	11.859375
1995	0	730	0	1	M	53	5	1	5.62	3.81	11.3	89.5	241	0	4.55	0.77	0.28	0.01	0.01	5.2	0.04	0.0122	32.6	3.996692393	1.9	2	0.4	9.63	53.1	152.9	13	8.846153846	7.792207792	5.909090909
1996	0	730	0	2	M	53	6	1	7.34	3.92	11.5	89.5	278	0	5.99	0.96	0.34	0.04	0.01	7.3	0.07	0.0172	31.9	4.864605799	2.2	1.5	0.4	13.52	53.4	150.9	16.7	8.794788274	10.41666667	6.239583333
1997	0	730	0	3	M	53	7	1	6.28	3.59	10.7	90.3	294	0.02	5.01	0.79	0.36	0.11	0.01	8.9	0.07	0.0158	28.9	3.585751356	2	-1.4	0.5	10.54	55.1	152.7	15.2	11.46496815	6.329113924	6.341772152
1998	0	730	0	4	M	53	8	1	6.18	3.69	10.9	91.6	299	0	5.1	0.65	0.3	0.12	0.01	21.5	0.14	0.0166	27.1	3.542708107	2	-2.8	0.7	10.59	54.2	153.1	20	7.063197026	6.153846154	7.846153846
1999	0	731	1	1	M	56	4	0	4.9	5.33	14	82.9	182	0	3.09	1.07	0.73	0	0.01	0.9	0.01	0.0373	28.4	4.8	3.9	1.4	0.1	8.70	49.5	155.5	3.7	0.149031297	0.934579439	2.887850467
2000	0	732	1	0	F	38	7	0	4.45	3.73	11	87.9	227	0	3.37	0.74	0.33	0.01	0	2.7	0.02	0.0504	29.3	2.657601978	1.7	-0.6	0.8	6.03	45.9	160.8	9.5	0.675675676	4.054054054	4.554054054
2001	0	733	1	0	M	76	13	1	11.12	3.68	10.4	89.4	295	0	8.07	2.4	0.56	0.06	0.03	8.3	0.2	0.0236	27.7	3.193163931	1.4	-1.6	0.4	9.42	48	145.2		2.4	5.833333333	3.3625
2002	0	734	1	0	M	70	12	0	2.49	4.04	11.9	94.3	141	0	1.21	0.89	0.37	0.01	0.01	9.0	0.08	0.0182	28.9	2.86825474	1.1	-0.9	0.9	4.04	56.6	164.9	2.2	0.909090909	0	1.359550562
2003	0	735	1	4	F	73	13	1	9.49	3.55	10.4	92.1	350	0	7.86	0.94	0.67	0	0.02	23.4	0.22	0.0405	27.9	2.840119166	2.1	-2.2	0.7	9.94	51.1	156.3	25.5	0.963081862	4.255319149	8.361702128
2004	0	735	0	4	F	73	13	1	10.97	3.8	11.2	98.9	369	0	9.08	1.1	0.76	0	0.03	19.1	0.21	0.0429	26.7	3.1402783	1	-2.9	1.2	11.59	52.2	157.2	27.3	1.167883212	4.545454545	8.254545455
2005	0	735	0	5	F	73	14	1	14.78	3.31	9.7	96.7	226	0.02	12	1.64	1.1	0	0.04	15.9	0.26	0.0397	26.1	4.574089291	1.4	-3.4	1.4	10.34	52.8	158.4	31.1	1.390268123	4.87804878	7.317073171
2006	0	735	0	6	F	73	15	1	10.98	2.87	8.4	96.2	219	0.02	9.52	0.84	0.6	0	0.02	25.0	0.21	0.0387	21.5	3.586321935	1.4	-6.7	3.2	7.85	52.8	157.9	31	2.022058824	2.380952381	11.33333333
2007	0	735	0	7	F	73	16	1	10.85	3.02	8.9	95	256	0	9.47	0.79	0.57	0	0.02	21.5	0.17	0.0378	21.6	5.015598752	1.6	-6.8	2.8	12.84	52.4	159.4	31.6	1.926782274	2.53164557	11.98734177
2008	0	735	0	8	F	73	17	1	10.54	2.63	7.9	96.2	239	0	9.41	0.61	0.5	0	0.02	24.6	0.15	0.0455	23	5.102305102	1.8	-6	2	12.19	53	162.4	36.1	3.253796095	1.639344262	15.42622951
2009	0	735	0	9	F	73	18	1	10.93	2.65	7.7	96.2	284	0	9.2	0.91	0.8	0	0.02	15.4	0.14	0.0554	21.9	4.125903871	1.7	-6.6	2.5	11.72	52.3	164.7	33	2.257636122	2.197802198	10.10989011
2010	0	736	1	0	F	33	7	0	6.01	5.17	13.3	78.3	227	0	4.19	1.43	0.35	0.03	0.01	0.7	0.01	0.0362	27.9	3.752985329	8.2	0.5	0.2	8.52	47.3	162.1	6.3	0.625	2.097902098	2.93006993
2011	0	737	1	0	M	57	10	1	6.43	4.07	12	98.8	398	0	4.71	0.84	0.63	0.23	0.02	7.1	0.06	0.0277	26.2	1.670843776	0.5	-3	1.6	6.65	50.8	152.1	17.9	1.188455008	9.523809524	5.607142857
2012	0	737	0	1	M	57	11	1	6.12	3.86	11.4	97.9	359	0.02	4.26	1.14	0.4	0.29	0.03	7.0	0.08	0.0324	26.7	2.693294247	0.5	-3	1.3	9.67	51.1	151.9	17.5	2.162162162	7.894736842	3.736842105
2013	0	737	0	2	M	57	12	1	7.22	3.73	11.1	98.1	362	0.02	5.4	1.01	0.52	0.25	0.04	22.8	0.23	0.0347	24.6	3.307842789	0.6	-4.9	1.6	11.97	51.6	151.1	13.9	2.202643172	4.95049505	5.346534653
2014	0	738	1	0	F	62	7	0	2.59	4.91	14.8	91.4	213	0	1.49	0.95	0.15	0	0	0.0	0	0.0329	32	1.845480138	1	0.4	0.1	3.93	50.9	154.6	7.4	1.538461538	3.157894737	1.568421053
2015	0	739	1	2	M	61	6	1	3.84	4.43	14.6	92.8	94	0											0.6
2016	0	739	0	4	M	61	8	1	3.11	4.25	14	93.4	75	0											0.6
2017	0	740	1	1	F	77	1	0	6.32	5.04	11.7	76.8	228	0	4.13	1.12	0.66	0.39	0.02	3.6	0.04				13.1				47.5	147	13.4	1.328903654	6.25	3.6875
2018	0	740	0	2	F	77	2	0	6.08	5.31	12.6	78.3	225	0	3.99	1.09	0.73	0.26	0.01	2.8	0.03				11.6				46.9	144.5	9.2	0.592592593	4.587155963	3.660550459
[truncated: 589 more rows]
