# Supplementary material for: A novel haemocytometric COVID-19 prognostic score developed and validated in an observational multicentre European hospital-based study
Source: eLife journal article supplement (doi:10.7554/elife.63195), 2020-11-26
Supplement: supp [file elife-63195-supp-v1.zip › elife_poa_e63195_Table_4_source_data_1.csv]

Table 4 – source data file 1. Development cohort prognostic score values by day based on clinical severity group, initial management and outcome
Filename	exclusion	length_of_hospitalisation	not_hospitalized	hospitalized	ventilatory_assistance	status changed?	Mortality	Critical_or_Fatal	Riskscore complete
117	0	0	1	0	0	1	0	0
118	0	0	1	0	0	1	0	0
131	0	0	1	0	0	1	0	0
136	0	0	1	0	0	1	0	0
137	0	0	1	0	0	1	0	0
138	0	0	1	0	0	1	0	0
184	0	0	1	0	0	1	0	0
186	0	0	1	0	0	1	0	0
194	0	0	1	0	0	1	0	0
197	0	0	1	0	0	1	0	0
201	0	0	1	0	0	1	0	0
218	0	0	1	0	0	1	0	0
222	0	0	1	0	0	1	0	0
225	0	0	1	0	0	1	0	0
254	0	0	1	0	0	1	0	0
281	0	0	1	0	0	1	0	0
298	0	0	1	0	0	1	0	0
326	0	0	1	0	0	1	0	0
337	0	0	1	0	0	1	0	0
338	0	0	1	0	0	1	0	0
343	0	0	1	0	0	1	0	0
352	0	0	1	0	0	1	0	0
353	0	0	1	0	0	1	0	0
437	0	0	1	0	0	1	0	0
440	0	0	1	0	0	1	0	0
441	0	0	1	0	0	1	0	0
447	0	0	1	0	0	1	0	0
779	0	0	1	0	0	1	0	0	0
780	0	0	1	0	0	1	0	0	0
790	0	0	1	0	0	1	0	0	3
847	0	0	1	0	0	1	0	0	0
866	0	0	1	0	0	1	0	0	0
883	0	0	1	0	0	1	0	0	1
884	0	0	1	0	0	1	0	0	0
909	0	0	1	0	0	1	0	0	0
910	0	0	1	0	0	1	0	0	0
1137	0	0	1	0	0	1	0	0
1220	0	0	1	0	0	1	0	0	2
1291	0	0	1	0	0	1	0	0	6
1319	0	0	1	0	0	1	0	0	1
1336	0	0	1	0	0	1	0	0	1
1950	0	0	1	0	0	1	0	0	4
1968	0	0	1	0	0	1	0	0	0
1991	0	0	1	0	0	1	0	0
2000	0	0	1	0	0	1	0	0	0
2020	0	0	1	0	0	1	0	0	0
2057	0	0	1	0	0	1	0	0
2082	0	0	1	0	0	1	0	0	2
2099	0	0	1	0	0	1	0	0	2
2108	0	0	1	0	0	1	0	0	5
2119	0	0	1	0	0	1	0	0	1
2129	0	0	1	0	0	1	0	0	0
2175	0	0	1	0	0	1	0	0	0
2188	0	0	1	0	0	1	0	0	0
2236	0	0	1	0	0	1	0	0	2
2268	0	0	1	0	0	1	0	0	3
2300	0	0	1	0	0	1	0	0	1
2301	0	0	1	0	0	1	0	0	0
2318	0	0	1	0	0	1	0	0	0
2414	0	0	1	0	0	1	0	0	0
2458	0	0	1	0	0	1	0	0	1
2467	0	0	1	0	0	1	0	0	4
2554	0	0	1	0	0	1	0	0	1
2617	0	0	1	0	0	1	0	0	0
