# Supplementary material for: A novel haemocytometric COVID-19 prognostic score developed and validated in an observational multicentre European hospital-based study
Source: eLife journal article supplement (doi:10.7554/elife.63195), 2020-11-26
Supplement: supp [file elife-63195-supp-v1.zip › elife_poa_e63195_Table_5_source_data_1.csv]

Table 5 – source data file 1. Receiver Operator Characteristics (ROC) curve comparisons between the haemocytometric COVID-19 prognostic score versus other parameters
Filename	exclusion	length_of_hospitalisation	Critical_or_Fatal	Riskscore complete	PLT(10^3/uL)	LYMPH#(10^3/uL)	MONO#(10^3/uL)	N/L ratio	PLT/LYMPH ratio
1	0	0	1	1	137	2.44	0.56	1.135245902	56.14754098
2	0	2	1	0	118	1.45	0.34	2.131034483	81.37931034
3	0	2	1	2	111	1.16	0.31	3.439655172	95.68965517
4	0	3	1	4	120	1	0.26	4.74	120
5	0	4	1	4	164	1.16	0.26	2.344827586	141.3793103
6	0	15	1	0	339	1.48	0.66	4.128378378	229.0540541
7	0	0	0	1	231	0.97	0.78	6.412371134	238.1443299
8	0	1	0	0	344	1.41	0.83	2.709219858	243.9716312
9	0	2	0	1	423	1.28	1.1	3.2265625	330.46875
10	0	3	0	1	482	1.75	1.24	2.274285714	275.4285714
11	0	4	0	1	550	2.11	1.34	1.582938389	260.6635071
12	0	6	0	1	648	2.11	1.27	1.848341232	307.1090047
13	0	0	1	3	147	0.74	0.3	5.445945946	198.6486486
14	0	1	1	2	155	1.05	0.18	2.676190476	147.6190476
15	0	1	1	7	144	0.37	0.08	7.72972973	389.1891892
16	0	2	1	9	192	0.75	0.1	7.786666667	256
17	0	3	1	6	214	1.04	0.06	5.057692308	205.7692308
18	0	4	1	8	222	0.67	0.1	4.955223881	331.3432836
19	0	4	1	7	216	0.62	0.13	4.967741935	348.3870968
20	0	5	1	4	227	0.72	0.18	5.152777778	315.2777778
21	0	6	1	6	240	1.05	0.24	3.638095238	228.5714286
22	0	7	1	8	200	0.93	0.19	3.032258065	215.0537634
23	0	8	1	4	253	1.11	0.24	2.126126126	227.9279279
24	0	9	1	6	367	1.57	0.45	1.993630573	233.7579618
25	0	10	1	4	453	1.44	0.48	2.611111111	314.5833333
26	0	11	1	3	491	1.41	0.58	2.056737589	348.2269504
27	0	12	1	2	525	1.01	0.9	3.089108911	519.8019802
28	0	13	1	1	655	1.24	1.11	2.903225806	528.2258065
29	0	0	1	3	160	0.71	0.2	8.366197183	225.3521127
30	0	1	1	8	166	0.21	0.22	52.33333333	790.4761905
31	0	1	1	8	173	0.36	0.16	36.05555556	480.5555556
32	0	2	1	2	145	0.4	0.17	14.675	362.5
33	0	3	1	5	175	0.15	0.1	54.73333333	1166.666667
34	0	4	1	9	172	0.16	0.27	65.1875	1075
35	0	5	1	12	156	0.1	0.27	132.5	1560
36	0	6	1	12	87	0.29	0.16	21.13793103	300
37	0	7	1	10	131	0.41	0.29	32.6097561	319.5121951
38	0	8	1	20	96	0.41	0.29	20.46341463	234.1463415
39	0	9	1	17	117	0.72	0.51	16.09722222	162.5
40	0	10	1	14	109	0.97	0.65	12.96907216	112.371134
41	0	10	1	15	111	1.05	0.64	10.79047619	105.7142857
42	0	11	1	12	125	1.5	1.1	11.1	83.33333333
43	0	12	1	6	35	1.08	0.35	10.87037037	32.40740741
44	0	13	1	5	56	0.9	0.59	13.58888889	62.22222222
45	0	14	1	5	134	1.53	0.75	8.078431373	87.58169935
46	0	0	0	2	192	0.58	0.9	13.96551724	331.0344828
47	0	1	0	1	173	0.5	0.67	15.88	346
48	0	0	0	0	280	0.71	0.38	4.985915493	394.3661972
49	0	2	0	3	293	0.58	0.39	5.568965517	505.1724138
50	0	3	0	0	322	0.7	0.46	4.214285714	460
51	0	5	0	3	470	0.78	0.56	4.487179487	602.5641026
52	0	0	0	0	185	1.3	0.3	3.2	142.3076923
53	0	2	0	3	206	1.89	0.34	1.111111111	108.994709
54	0	3	0	3	252	1.84	0.27	0.809782609	136.9565217
55	0	4	0	0	286	1.73	0.3	0.751445087	165.3179191
56	0	5	0	0	314	1.71	0.35	0.695906433	183.625731
57	0	6	0	0	320	1.68	0.41	0.976190476	190.4761905
58	0	1	0		158	1.58	0.28	0.85443038	100
59	0	0	0	1	225	0.5	1.09	10.54	450
60	0	2	0		221
61	0	3	0	2	259	0.58	0.87	6.120689655	446.5517241
62	0	4	0	1	247	0.52	0.89	6.326923077	475
63	0	5	0	2	278	0.63	0.79	5.365079365	441.2698413
64	0	7	0	1	300	0.78	1.01	4.012820513	384.6153846
65	0	0	1	4	165	0.36	0.29	8.611111111	458.3333333
66	0	1	1	3	151	0.33	0.3	8.727272727	457.5757576
67	0	3	1	5	175	0.28	0.33	15.46428571	625
68	0	4	1	11	183	0.18	0.18	34.27777778	1016.666667
69	0	0	0	1	96	0.68	0.59	7.676470588	141.1764706
70	0	1	0	2	113	1.1	0.53	2.081818182	102.7272727
71	0	3	0	0	127	0.99	0.49	1.828282828	128.2828283
72	0	0	1	3	164	0.32	0.26	14.8125	512.5
73	0	2	1	4	221	0.68	0.43	9.764705882	325
74	0	5	1		344	1.66	0.52	3.722891566	207.2289157
75	0	6	1	8	277	1.66	0.54	5.801204819	166.8674699
76	0	7	1	9	293	1.74	0.58	6.143678161	168.3908046
77	0	8	1	12	293	1.26	0.76	13.96031746	232.5396825
78	0	9	1	12	297	1.36	0.55	11.83823529	218.3823529
79	0	9	1	12	291	1.43	0.8	9.671328671	203.4965035
80	0	10	1	11	288	1.51	0.75	7.874172185	190.7284768
81	0	11	1	8	290	1.76	1.09	7.318181818	164.7727273
82	0	12	1	8	302	2.17	1.29	6.105990783	139.1705069
83	0	13	1	8	276	2.32	1.2	5.13362069	118.9655172
84	0	1	0		214	1.38	1.87	2.347826087	155.0724638
85	0	13	1		469	1.76	1.69	5.056818182	266.4772727
86	0	14	1	2	466	1.63	1.95	6.90797546	285.8895706
87	0	15	1	2	525	2.1	1.71	4.60952381	250
88	0	16	1	1	534	1.9	1.79	5.673684211	281.0526316
89	0	17	1	1	564	2.26	1.62	4.32300885	249.5575221
90	0	18	1	1	569	2.01	1.38	4.731343284	283.0845771
91	0	19	1	1	558	2.51	1.38	3.474103586	222.310757
92	0	20	1	0	580	2.29	1.24	3.991266376	253.2751092
93	0	11	1		234	1.02	1.58	3.892156863	229.4117647
94	0	12	1	8	244	0.85	1.54	5.070588235	287.0588235
95	0	13	1	10	214	0.42	1.42	14.33333333	509.5238095
96	0	14	1	6	233	0.72	1.7	7.680555556	323.6111111
97	0	15	1	3	249	1.24	1.97	3.870967742	200.8064516
98	0	16	1	7	248	1.56	1.92	3.730769231	158.974359
99	0	17	1	13	274	1.47	1.88	8.557823129	186.3945578
100	0	18	1	7	230	0.81	1.15	12.59259259	283.9506173
101	0	19	1	8	258	0.7	1.03	14.42857143	368.5714286
102	0	1	0		192
103	0	2	0	0	203	1.41	0.51	1.602836879	143.9716312
104	0	4	0	0	266	1.48	0.49	1.574324324	179.7297297
105	0	0	1	7	213	0.54	0.31	22.61111111	394.4444444
106	0	2	1	3	174	0.79	0.24	12.13924051	220.2531646
107	0	2	1	7	205	0.58	0.12	14.75862069	353.4482759
108	0	3	1	7	216	0.57	0.26	15.07017544	378.9473684
109	0	4	1	9	231	0.67	0.25	13.04477612	344.7761194
110	0	0	1	1	117	1.44	0.43	3.513888889	81.25
111	0	1	1	0	152	1.39	0.48	5.71942446	109.352518
112	0	3	1	1	197	1.57	0.73	6.630573248	125.477707
113	0	0	0	0	241	0.94	0.22	4.521276596	256.3829787
114	0	1	0	3	251	1.41	0.25	2.921985816	178.0141844
115	0	3	0	0	303	1.12	0.32	4.357142857	270.5357143
116	0	0	1		175	0.82	0.28	11.57317073	213.4146341
117	0	0	0		202	1.13	0.62	3.451327434	178.7610619
118	0	0	0		171	0.45	0.27	12.22222222	380
119	0	0	0		161	0.96	0.25	2.635416667	167.7083333
120	0	0	1		139	0.43	0.14	8.651162791	323.255814
121	0	0	0		254	0.64	0.51	13	396.875
122	0	0	0		246	1.8	1.79	12.19444444	136.6666667
123	0	0	0		247	1.68	0.83	3.05952381	147.0238095
124	0	0	0		187	0.89	0.18	3.820224719	210.1123596
125	0	0	1		175
126	0	4	1		203	0.86	0.5	8.104651163	236.0465116
127	0	0	0		401	0.51	0.18	9.803921569	786.2745098
128	0	0	1		133	0.26	0.26	10.96153846	511.5384615
129	0	0	1		169	0.72	0.43	3.402777778	234.7222222
130	0	0	1		241
131	0	0	0		231	1.27	0.44	2.141732283	181.8897638
132	0	0	1	2	320	3.81	0.36	2.356955381	83.98950131
133	0	0	0		175	0.44	0.68	13.18181818	397.7272727
134	0	0	1		170	0.69	0.23	6.31884058	246.3768116
135	0	0	0		274	0.92	0.76	6.152173913	297.826087
136	0	0	0		152	1.78	0.75	3.039325843	85.39325843
137	0	0	0		199	1.28	0.92	1.34375	155.46875
138	0	0	0		163	2.04	0.47	2.009803922	79.90196078
139	0	0	0		204	1.62	0.54	3.407407407	125.9259259
140	0	0	0		104	0.4	0.59	11.625	260
141	0	0	1		384	0.83	0.77	22.89156627	462.6506024
142	0	1	1		353
143	0	1	1		373
144	0	2	1		355	0.52	0.26	35.94230769	682.6923077
145	0	3	1		239
146	0	4	1		220	0.86	0.64	33.04651163	255.8139535
147	0	5	1		283	1.25	0.82	18.112	226.4
148	0	5	1		332
149	0	6	1		314	1.14	0.84	14.74561404	275.4385965
150	0	6	1		326
151	0	7	1		366	0.83	0.83	17.42168675	440.9638554
152	0	7	1		447
153	0	8	1		483	0.74	1	22.58108108	652.7027027
154	0	9	1		594	0.76	1.07	26.17105263	781.5789474
155	0	10	1		630	0.82	1.1	23.46341463	768.2926829
156	0	11	1		588	0.98	1.01	18.58163265	600
157	0	12	1		464	1.08	0.85	13.74074074	429.6296296
158	0	13	1		406	1.5	0.74	7.193333333	270.6666667
159	0	14	1		442	1.47	0.83	9.204081633	300.6802721
160	0	15	1		344	1.51	0.75	8.490066225	227.8145695
161	0	16	1		333	1.44	0.67	6.881944444	231.25
162	0	17	1		303	1.33	0.72	6.165413534	227.8195489
163	0	18	1		290	1.52	0.71	5.131578947	190.7894737
164	0	19	1		284	1.41	0.78	6.432624113	201.4184397
165	0	20	1		310	1.62	0.97	5.25308642	191.3580247
166	0	21	1		327	1.67	0.76	3.874251497	195.8083832
167	0	22	1		215	1.65	0.75	3.290909091	130.3030303
168	0	0	0		266	0.92	0.87	4.434782609	289.1304348
169	0	0	0		176	2.07	0.43	4.47826087	85.02415459
170	0	0	1		190	0.38	0.39	6.473684211	500
171	0	0	1		195
172	0	0	0		143	1.13	0.7	2.89380531	126.5486726
173	0	0	0		157	1	0.33	5.04	157
174	0	0	1		234	1.24	0.6	4.483870968	188.7096774
175	0	0	1		180	0.36	0.59	18.83333333	500
176	0	0	1		178	0.8	0.55	7.4625	222.5
177	0	4	1		199	0.69	0.43	8.768115942	288.4057971
178	0	10	1		322	0.58	0.52	16.27586207	555.1724138
179	0	11	1		425	0.61	0.82	25.49180328	696.7213115
180	0	0	0		134	2.06	0.79	1.247572816	65.04854369
181	0	0	1		153	0.86	0.43	7.139534884	177.9069767
182	0	0	0		265	1.18	0.53	5.525423729	224.5762712
183	0	0	0		58	0.5	0.3	7.08	116
184	0	0	0		179	1.27	0.3	2.102362205	140.9448819
185	0	0	0		278	0.62	0.29	9.790322581	448.3870968
186	0	0	0		172	1.39	0.4	3.992805755	123.7410072
187	0	0	1		399	0.77	0.46	6.519480519	518.1818182
188	0	0	0		189	1.12	0.32	4.598214286	168.75
189	0	0	0		202	1.82	0.37	1.252747253	110.989011
190	0	0	0		84
191	0	0	1		205	0.64	1.19	17.234375	320.3125
192	0	0	0		354
193	0	0	0		100	0.33	0.18	15.66666667	303.030303
194	0	0	0		176	1.82	0.42	1.247252747	96.7032967
195	0	0	0		94	0.4	0.12	1.25	235
196	0	0	0		183	0.88	0.56	3.5	207.9545455
197	0	0	0		178	1.2	0.54	5.2	148.3333333
198	0	0	0		218	1.24	0.42	4.685483871	175.8064516
199	0	0	0		222	0.94	0.56	2.138297872	236.1702128
200	0	0	0		191	1.6	0.19	2.5625	119.375
201	0	0	0		100
202	0	0	0		135	0.79	0.41	3.924050633	170.8860759
203	0	0	1		159	0.55	0.33	8.545454545	289.0909091
204	0	0	0		170	1.48	0.61	2.716216216	114.8648649
205	0	0	0		154
206	0	1	0		158
207	0	2	0		135
208	0	3	0		116	1.33	0.43	2.037593985	87.21804511
209	0	5	0		121	1.34	0.41	2.156716418	90.29850746
210	0	7	0		123
211	0	8	0		150	1.16	0.39	2.396551724	129.3103448
212	0	9	0		197
213	0	10	0		230	1.9	0.42	2.657894737	121.0526316
214	0	12	0		299	1.86	0.58	3.693548387	160.7526882
215	0	0	0		180	0.98	0.51	4.336734694	183.6734694
216	0	0	1		140	0.62	0.33	4.35483871	225.8064516
217	0	0	0		260	0.64	0.6	11.078125	406.25
218	0	0	0		199	0.9	0.48	5.011111111	221.1111111
220	0	0	1		79	0.1	0.19	32.7	790
221	0	0	1		279	0.79	0.29	6.329113924	353.164557
222	0	0	0		158	1.16	0.39	2.25862069	136.2068966
223	0	0	0		166	1.85	0.4	1.913513514	89.72972973
225	0	0	0		177	0.95	0.24	10.04210526	186.3157895
226	0	0	0		106	0.59	0.57	6.322033898	179.6610169
227	0	0	0		150	0.66	0.39	4.848484848	227.2727273
228	0	0	1		159	0.46	0.29	18.63043478	345.6521739
229	0	1	1		157
230	0	2	1		233	0.68	0.43	12.19117647	342.6470588
231	0	0	0		212	1.25	0.49	3.336	169.6
232	0	0	0		111	1.92	0.49	2.770833333	57.8125
233	0	0	1		168	0.37	0.43	11.37837838	454.0540541
234	0	0	0		168	0.6	0.28	12.71666667	280
235	0	0	0		157	0.89	0.28	4.359550562	176.4044944
236	0	2	0		178	1.07	0.24	4.355140187	166.3551402
237	0	4	0		207
238	0	5	0		245
239	0	13	0		281	1.57	0.54	2.012738854	178.9808917
240	0	0	1		186	1.3	0.59	6.338461538	143.0769231
241	0	1	1		166	1.51	0.53	5	109.9337748
242	0	2	1		147
243	0	3	1		149
244	0	4	1		142
245	0	5	1		133
246	0	0	1		254	0.73	0.54	5.671232877	347.9452055
247	0	0	1		226	0.8	0.35	4.5875	282.5
248	0	0	0		188	0.31	0.12	23.12903226	606.4516129
249	0	0	1		172	0.27	0.11	10.51851852	637.037037
250	0	1	1		168	0.45	0.14	9.622222222	373.3333333
251	0	0	1		137	0.74	0.23	7.189189189	185.1351351
252	0	0	0		263	0.87	0.29	10.37931034	302.2988506
253	0	0	1		82	0.42	0.29	8.047619048	195.2380952
254	0	0	0		121	0.63	0.62	9.523809524	192.0634921
255	0	0	0		215	1.01	0.41	3.712871287	212.8712871
256	0	0	1		125	0.96	0.41	3.458333333	130.2083333
257	0	0	0		132	1.2	0.23	3.358333333	110
258	0	1	0		136
259	0	2	0		162
260	0	3	0		175
261	0	4	0		192
262	0	5	0		212
263	0	6	0		265
264	0	7	0		250
265	0	7	0		246
266	0	8	0		231	0.93	0.34	4.010752688	248.3870968
267	0	9	0		207	1.22	0.36	2.475409836	169.6721311
268	0	10	0		214	1.22	0.32	2.606557377	175.4098361
269	0	11	0		234	1.27	0.26	1.220472441	184.2519685
270	0	12	0		245	1.44	0.39	1.680555556	170.1388889
271	0	13	0		279	1.45	0.39	1.475862069	192.4137931
272	0	16	0		235	1.77	0.42	0.790960452	132.7683616
273	0	17	0		240	1.6	0.33	0.74375	150
274	0	20	0		238	2.06	0.34	0.616504854	115.5339806
275	0	0	0		177	0.96	0.13	4.78125	184.375
276	0	0	0		192	0.99	0.28	6.646464646	193.9393939
277	0	0	0		136	0.98	0.34	4.734693878	138.7755102
278	0	0	1		107	0.75	0.46	1.666666667	142.6666667
279	0	0	1		263	1.27	0.54	6.212598425	207.0866142
280	0	0	1		199	1.55	0.61	6.851612903	128.3870968
281	0	0	0		194	0.82	0.89	7.43902439	236.5853659
282	0	0	1		174	0.53	0.1	17.83018868	328.3018868
283	0	0	1		149	0.95	1.21	12.50526316	156.8421053
284	0	0	1		162	0.37	0.18	13.54054054	437.8378378
285	0	0	1		167	2.13	0.62	3.03286385	78.40375587
286	0	0	0		378	1.33	0.65	5.804511278	284.2105263
287	0	4	0		542
288	0	7	0		476
289	0	9	0		394
290	0	0	1		136	1.33	0.46	8.789473684	102.2556391
291	0	0	0		245	1.07	0.5	4.757009346	228.9719626
292	0	0	0		151	1.57	0.76	3.006369427	96.17834395
293	0	0	1		164	0.82	0.36	5.829268293	200
294	0	2	1		201	0.73	0.36	12.63013699	275.3424658
295	0	0	0		141	0.94	0.59	4.606382979	150
296	0	4	0		130	1.46	0.59	2.719178082	89.04109589
297	0	0	1		91	0.77	0.43	4.090909091	118.1818182
298	0	0	0		174	0.93	0.46	2.086021505	187.0967742
299	0	0	1		186	0.92	0.37	5.815217391	202.173913
300	0	0	1		89	0.5	0.23	4.38	178
301	0	0	1		131	0.75	0.82	8.36	174.6666667
302	0	0	1		168	0.86	0.57	4.988372093	195.3488372
303	0	0	1		146	0.4	0.26	13.125	365
304	0	2	1		104	0.25	0.25	19.8	416
305	0	3	1		133	0.23	0.23	23.04347826	578.2608696
306	0	0	0		179	0.78	0.28	5.512820513	229.4871795
307	0	0	0		117	0.5	0.17	8.9	234
308	0	5	0		196	0.35	0.21	21.77142857	560
309	0	7	0		301	0.55	0.24	4.727272727	547.2727273
310	0	8	0		327
311	0	9	0		353	0.51	0.34	5.68627451	692.1568627
312	0	10	0		344	0.57	0.46	5.701754386	603.5087719
313	0	11	0		395	0.78	0.53	4.679487179	506.4102564
314	0	12	0		369	0.89	0.54	3.696629213	414.6067416
315	0	13	0		425	1.11	0.74	2.990990991	382.8828829
316	0	14	0		412	1.13	0.72	3.123893805	364.6017699
317	0	0	1		298	0.55	0.36	14.70909091	541.8181818
318	0	1	1		271	0.69	0.27	11.1884058	392.7536232
319	0	2	1		337
320	0	4	1		283	0.28	0.21	27.5	1010.714286
321	0	0	0		110	0.81	0.38	4.172839506	135.8024691
322	0	0	0		197	1.32	0.13	2.318181818	149.2424242
323	0	0	0		199	1.37	0.39	2.116788321	145.2554745
324	0	2	0		170	1.2	0.25	2.258333333	141.6666667
325	0	6	0		235	1.6	0.54	2.18125	146.875
326	0	0	0		224	1.38	0.7	3.695652174	162.3188406
327	0	0	1		251	0.65	0.36	9.707692308	386.1538462
328	0	0	1		387	0.97	0.67	9.494845361	398.9690722
329	0	0	0		214	1.64	0.56	1.75	130.4878049
330	0	0	0		216	1.04	0.33	5.163461538	207.6923077
331	0	0	0		173	0.68	0.37	5.338235294	254.4117647
332	0	0	1		216	0.67	0.3	8.044776119	322.3880597
333	0	0	1		176	0.16	0.16	49.75	1100
334	0	0	0		166	1.07	0.27	3.009345794	155.1401869
335	0	0	1		32	0.67	0.2	12.2238806	47.76119403
336	0	0	1		222	0.78	0.35	7.08974359	284.6153846
337	0	0	0		241	1.73	0.46	1.682080925	139.3063584
338	0	0	0		171	0.37	0.72	13.13513514	462.1621622
339	0	0	0		164	1.54	0.46	2.577922078	106.4935065
340	0	0	0		210	0.73	0.45	8.095890411	287.6712329
341	0	0	0		247	0.96	0.47	9.75	257.2916667
342	0	0	1		160	2.37	0.58	4.725738397	67.51054852
343	0	0	0		221	1.02	0.53	5.480392157	216.6666667
344	0	0	0		210	0.38	0.27	14.89473684	552.6315789
345	0	0	0		130	1.25	0.6	5.496	104
346	0	0	1		257	1.42	0.41	4.070422535	180.9859155
347	0	0	1		164	0.68	0.31	10.73529412	241.1764706
348	0	0	0		251	1.11	0.22	7.54954955	226.1261261
349	0	0	1		140	0.74	0.2	5.635135135	189.1891892
350	0	0	1		280	0.66	0.42	10.09090909	424.2424242
351	0	0	1		104	1.18	0.43	4.271186441	88.13559322
352	0	0	0		139	0.63	0.28	2.285714286	220.6349206
353	0	0	0		141	1.45	0.22	1.586206897	97.24137931
355	0	0	0		198	0.45	0.52	16.44444444	440
356	0	0	0		161	1.2	1.02	9.266666667	134.1666667
357	0	0	0		266	1.53	0.96	4.431372549	173.8562092
358	0	0	1		142	0.63	0.25	4.603174603	225.3968254
359	0	0	0		167	1.41	0.88	7.546099291	118.4397163
360	0	0	1		171	0.78	0.3	7.564102564	219.2307692
361	0	0	0		155	1.57	0.42	1.757961783	98.72611465
362	0	0	0		413	0.68	0.15	16.16176471	607.3529412
363	0	0	1		187	1	0.48	4	187
364	0	0	0		148	0.55	0.48	10.18181818	269.0909091
365	0	2	0		191
366	0	3	0		229
367	0	5	0		316	0.53	0.49	14.05660377	596.2264151
368	0	6	0		327
369	0	6	0		313
370	0	7	0		347
371	0	8	0		380
372	0	9	0		432	0.4	0.74	38.8	1080
373	0	10	0		445	0.42	0.98	33.5	1059.52381
374	0	11	0		408
375	0	12	0		408	0.77	1.86	17.38961039	529.8701299
376	0	13	0		336
377	0	14	0		337	0.9	1.61	17.52222222	374.4444444
378	0	15	0		311
379	0	16	0		280	1.22	1.64	8.754098361	229.5081967
380	0	0	1		274	0.64	0.51	11.390625	428.125
381	0	0	0		176	1.3	0.56	6.346153846	135.3846154
382	0	0	0		154	1.48	1.05	2.635135135	104.0540541
383	0	0	0		170	1.09	0.58	5.642201835	155.9633028
384	0	0	0		233	2.1	0.38	1.714285714	110.952381
385	0	0	0		144	1.78	0.34	0.741573034	80.8988764
386	0	0	1		122	1.13	0.25	2.10619469	107.9646018
387	0	0	0		141	0.48	0.3	9.270833333	293.75
388	0	0	1		152	0.74	0.23	3.527027027	205.4054054
389	0	0	1		174	0.87	0.18	5.436781609	200
390	0	2	1		204
391	0	4	1		212	0.88	0.25	8.329545455	240.9090909
392	0	0	0		120	1.87	0.73	1.705882353	64.17112299
393	0	0	0		105	0.86	0.51	4.848837209	122.0930233
394	0	0	0		278	0.82	0.34	19.7804878	339.0243902
395	0	0	0		184	1.93	0.56	2.647668394	95.33678756
396	0	0	1		162	0.69	0.35	5.231884058	234.7826087
397	0	0	0		153	2.01	0.8	4.407960199	76.11940299
398	0	0	1		157	0.86	0.9	9.058139535	182.5581395
399	0	0	0		139	1.17	0.41	4.555555556	118.8034188
400	0	0	0		226	1.27	1.68	5.448818898	177.9527559
401	0	0	1		178	0.73	0.34	12.02739726	243.8356164
402	0	0	1		118	0.9	0.33	4.733333333	131.1111111
403	0	0	1		292	0.85	1.09	6.611764706	343.5294118
404	0	0	1		128	0.54	0.71	13.03703704	237.037037
405	0	0	1		206	0.51	0.47	9.764705882	403.9215686
406	0	0	0		456	1.61	0.51	2.627329193	283.2298137
407	0	0	0		174	0.82	0.47	4.5	212.195122
408	0	0	0		136	0.81	0.28	1.703703704	167.9012346
409	0	0	0		197	0.97	0.28	5.432989691	203.0927835
410	0	0	1		55	0.66	0.17	2.696969697	83.33333333
411	0	0	0		119	0.97	0.39	6.577319588	122.6804124
412	0	0	1		262	0.19	0.15	33	1378.947368
413	0	0	0		115	1.3	0.47	4.561538462	88.46153846
414	0	0	1	2	200	1.46	1.67	2.732876712	136.9863014
415	0	0	1		154	1.25	0.45	3.872	123.2
416	0	0	1		109	0.39	0.51	7.846153846	279.4871795
417	0	0	1		116	0.92	0.66	3.445652174	126.0869565
418	0	0	0		143	1.23	0.2	1.43902439	116.2601626
419	0	2	0		156	1.23	0.24	2.016260163	126.8292683
420	0	3	0		215
421	0	4	0		231	1.43	0.34	2.377622378	161.5384615
422	0	6	0		392
423	0	7	0		364
424	0	9	0		424	1.95	0.51	0.897435897	217.4358974
425	0	0	1		123	1.51	0.6	2.463576159	81.45695364
426	0	3	1		168	1.19	0.28	9.890756303	141.1764706
427	0	5	1		212	0.78	0.29	8.525641026	271.7948718
428	0	7	1		250
429	0	0	0		187	1.79	0.47	4.12849162	104.4692737
430	0	0	0		195	1.19	0.27	2.932773109	163.8655462
431	0	0	1		356	1.15	0.53	7.043478261	309.5652174
432	0	0	0		115	0.45	0.19	19.53333333	255.5555556
433	0	0	0		265	0.77	0.37	8.415584416	344.1558442
434	0	0	1		131	1.32	0.7	2.515151515	99.24242424
435	0	0	1		183	0.76	0.5	6.421052632	240.7894737
436	0	0	1		65	0.59	0.45	6.186440678	110.1694915
437	0	0	0		165	0.86	0.59	3.779069767	191.8604651
438	0	0	0		160	0.77	0.73	5.428571429	207.7922078
439	0	0	0		198	0.99	0.3	3.111111111	200
440	0	0	0		227	0.79	0.47	2.594936709	287.3417722
441	0	0	0		104	1.55	0.35	1.735483871	67.09677419
442	0	0	1		145	0.49	0.2	5.530612245	295.9183673
443	0	0	0		362	0.79	0.61	7.088607595	458.2278481
444	0	0	0	0	195	1.36	0.57	6.095588235	143.3823529
445	0	0	0		184	1.26	0.54	3.817460317	146.031746
446	0	0	0		262	1.26	0.4	4.166666667	207.9365079
447	0	0	0		140	0.78	0.28	3.576923077	179.4871795
448	0	1	1	15	73	0.3	0.3	42.23333333	243.3333333
449	0	1	1	15	77	0.23	0.38	55.13043478	334.7826087
450	0	1	1	15	73	0.27	0.3	48.88888889	270.3703704
451	0	2	1	15	78	0.34	0.11	42.41176471	229.4117647
452	0	3	1	16	50	0.28	0.09	37.5	178.5714286
453	0	4	1	16	58	0.42	0.06	15.38095238	138.0952381
454	0	5	1	15	33	0.66	0.09	9.53030303	50
455	0	11	1	11	192	1.25	0.75	9.76	153.6
456	0	12	1	7	124	1.41	0.48	3.510638298	87.94326241
457	0	13	1	6	143	1.97	1.06	3.263959391	72.58883249
458	0	14	1	6	169	1.71	1.01	3.280701754	98.83040936
459	0	15	1	9	205	2.03	0.93	3.285714286	100.9852217
460	0	16	1	7	260	1.91	1.06	4.272251309	136.1256545
461	0	0	0	4	247	0.73	0.35	8.273972603	338.3561644
462	0	1	0	2	165	0.9	0.25	3.644444444	183.3333333
463	0	3	0	8	236	0.52	0.26	9	453.8461538
464	0	4	0	7	247	0.58	0.33	7.327586207	425.862069
465	0	0	1	10	288	0.81	0.35	13.2345679	355.5555556
466	0	0	1		264	0.7	0.2	11.22857143	377.1428571
467	0	1	1		294	0.97	0.34	12.1443299	303.0927835
468	0	2	1	9	250	0.62	0.31	12.56451613	403.2258065
469	0	2	1	10	260	0.71	0.37	11.76056338	366.1971831
470	0	3	1	10	289	0.54	0.37	14.77777778	535.1851852
471	0	4	1	11	344	0.4	0.43	17.825	860
472	0	5	1	6	392	0.61	0.5	9.327868852	642.6229508
473	0	5	1	4	299	0.73	0.42	7.315068493	409.5890411
474	0	6	1	6	404	0.69	0.61	8.637681159	585.5072464
475	0	0	1	9	269	0.48	0.28	25.85416667	560.4166667
476	0	1	1	11	242	0.44	0.27	24.20454545	550
477	0	1	1	11	296	0.36	0.5	27.72222222	822.2222222
478	0	1	1	6	262	0.54	0.38	11.94444444	485.1851852
479	0	2	1	7	191	0.56	0.23	6.892857143	341.0714286
480	0	2	1	7	188	0.51	0.23	6.823529412	368.627451
481	0	8	1	6	604	1.32	0.98	7.21969697	457.5757576
482	0	9	1	8	453	1.01	0.7	9.544554455	448.5148515
483	0	9	1	10	446	0.66	0.66	15.54545455	675.7575758
484	0	10	1	11	414	0.67	0.65	12.29850746	617.9104478
485	0	11	1	11	437	0.56	0.72	19.44642857	780.3571429
486	0	2	0	1	253	1.02	0.68	4.068627451	248.0392157
487	0	6	0	0	358	1.37	0.67	1.846715328	261.3138686
488	0	2	1	13	226	0.92	0.76	20.22826087	245.6521739
489	0	0	0	4	219	0.66	0.38	8.636363636	331.8181818
490	0	2	0	4	254	0.75	0.37	6.733333333	338.6666667
491	0	2	0	6	284	0.4	0.51	11.8	710
492	0	4	0	6	388	0.51	0.72	11.62745098	760.7843137
493	0	5	0	6	408	0.66	0.7	8.742424242	618.1818182
494	0	6	0	6	428	0.7	0.77	8.471428571	611.4285714
495	0	1	0	1	150	1.29	0.22	2.19379845	116.2790698
496	0	2	0	1	175	0.9	0.21	3.877777778	194.4444444
497	0	3	0	1	188	0.87	0.27	4.735632184	216.091954
498	0	4	0	2	230	0.96	0.31	4.635416667	239.5833333
499	0	2	1	16	294	0.65	0.33	20.24615385	452.3076923
500	0	3	1	11	329	0.5	0.1	15.42	658
501	0	3	1	14	282	0.69	0.14	10.53623188	408.6956522
502	0	4	1	13	183	0.4	0.09	10.925	457.5
503	0	4	1	13	210	0.44	0.11	11.43181818	477.2727273
504	0	4	1	12	232	0.39	0.15	16.12820513	594.8717949
505	0	5	1	13	228	0.52	0.25	12.07692308	438.4615385
506	0	6	1	10	174	0.65	0.24	9.615384615	267.6923077
507	0	7	1	12	162	0.75	0.52	8.573333333	216
508	0	2	0	2	209	1.14	0.71	4.51754386	183.3333333
509	0	5	0	2	357	1.41	0.75	6.397163121	253.1914894
510	0	6	0	3	397	1.76	0.98	4.954545455	225.5681818
511	0	2	0	2	451	1.14	1.09	2.745614035	395.6140351
512	0	3	0	2	458	1.83	0.99	0.786885246	250.273224
513	0	5	0	1	460	1.44	0.74	0.381944444	319.4444444
514	0	7	1	0	313	1.29	0.94	6.558139535	242.6356589
515	0	8	1	1	326	1.08	0.87	7.305555556	301.8518519
516	0	9	1	1	300	1.25	1.08	5.32	240
517	0	10	1	0	294	1.42	1.04	4.64084507	207.0422535
518	0	11	1	0	298	1.59	1.44	5.251572327	187.4213836
519	0	12	1	3	273	1.04	1.4	10.13461538	262.5
520	0	6	1	7	291	0.68	0.24	6.367647059	427.9411765
521	0	7	1	5	282	0.73	0.24	5.082191781	386.3013699
522	0	7	1	6	285	0.81	0.23	5.283950617	351.8518519
523	0	7	1	6	127	0.36	0.1	5.944444444	352.7777778
524	0	7	1	10	279	0.69	0.2	6.231884058	404.3478261
525	0	8	1	6	274	0.86	0.34	4.325581395	318.6046512
526	0	9	1	7	320	0.74	0.4	5.148648649	432.4324324
527	0	6	1	14	265	0.32	1.41	71.125	828.125
528	0	6	0	9	185	0.87	0.49	5.528735632	212.6436782
529	0	7	0	7	174	1.13	0.7	4.477876106	153.9823009
530	0	8	0	3	168	1.55	0.62	2.658064516	108.3870968
531	0	9	0	2	142	1.68	0.56	2.119047619	84.52380952
532	0	10	0	1	149	1.57	0.63	3.445859873	94.9044586
533	0	1	0	8	100	0.39	0.15	8.538461538	256.4102564
534	0	2	0	7	96	0.56	0.15	5.303571429	171.4285714
535	0	1	1	6	190	0.8	0.53	13.325	237.5
536	0	3	1	5	273	0.72	0.75	13.33333333	379.1666667
537	0	4	1	9	293	0.47	0.71	22	623.4042553
538	0	5	1	12	360	0.58	0.72	18.84482759	620.6896552
539	0	2	0	1	256	1.18	0.67	3.101694915	216.9491525
540	0	3	0	0	328	1.24	0.73	4.177419355	264.516129
541	0	7	0	2	345	1.23	0.46	4.601626016	280.4878049
542	0	8	0	3	367	1.31	0.42	4.221374046	280.1526718
543	0	0	1	4	298	0.67	0.75	8	444.7761194
544	0	2	1	5	330	0.68	0.85	13.20588235	485.2941176
545	0	4	1	6	354	0.58	0.39	7.637931034	610.3448276
546	0	5	1	6	308	0.48	0.5	10.83333333	641.6666667
547	0	6	1	6	257	0.82	0.56	9.475609756	313.4146341
548	0	6	1	7	275	0.78	0.38	7.08974359	352.5641026
549	0	7	1	13	296	0.94	0.5	5.393617021	314.893617
550	0	8	1	9	312	1.21	0.62	5.016528926	257.8512397
551	0	9	1	10	283	0.88	0.65	8.920454545	321.5909091
552	0	11	1	8	322	0.91	0.65	7.78021978	353.8461538
553	0	12	1	5	300	1.03	0.63	6.902912621	291.2621359
554	0	12	1	8	297	0.85	0.51	8.552941176	349.4117647
555	0	2	0	5	144	0.52	0.2	3.826923077	276.9230769
556	0	4	0	4	199	0.39	0.32	7.743589744	510.2564103
557	0	5	0	4	228	0.61	0.34	5.114754098	373.7704918
558	0	6	0	2	265	0.59	0.42	6.915254237	449.1525424
559	0	7	0	8	354	0.82	0.46	6.195121951	431.7073171
560	0	7	0	2	293	0.97	0.37	3.525773196	302.0618557
561	0	11	0	1	474	0.78	0.27	3.923076923	607.6923077
562	0	12	0	0	431	1.23	0.36	2.780487805	350.4065041
563	0	3	0	0	148	1.06	0.25	2.216981132	139.6226415
564	0	4	0	0	159	1	0.23	2.55	159
565	0	5	0	0	164	0.73	0.31	4.301369863	224.6575342
566	0	7	0	0	206	0.94	0.56	3.159574468	219.1489362
567	0	0	1	1	129	0.46	0.11	8.195652174	280.4347826
568	0	1	1	3	112	0.51	0.1	6.960784314	219.6078431
569	0	2	1	1	113	0.81	0.1	5.395061728	139.5061728
570	0	0	1		112	0.97	0.33	3.75257732	115.4639175
571	0	4	1	11	153	0.62	0.37	9.612903226	246.7741935
572	0	5	1	13	193	0.6	0.46	9.05	321.6666667
573	0	6	1	12	198	0.57	0.53	7.298245614	347.3684211
574	0	7	1	14	214	0.56	0.77	10.57142857	382.1428571
575	0	0	0	0	169	1.17	0.36	3.623931624	144.4444444
576	0	2	0	0	215	1.39	0.43	2.45323741	154.676259
577	0	2	1	7	731	0.9	0.56	19.83333333	812.2222222
578	0	2	1	8	625	0.67	0.46	22.88059701	932.8358209
579	0	3	1	7	631	1.28	0.69	13.34375	492.96875
580	0	3	1	9	640	1.34	0.76	12.7238806	477.6119403
581	0	4	0	0	411	2.42	1.46	1.384297521	169.8347107
582	0	3	1	15	250	0.42	0.88	28.16666667	595.2380952
583	0	4	1	11	227	0.32	0.69	19.28125	709.375
584	0	5	1	16	249	0.25	0.51	18.52	996
585	0	7	1	12	394	0.31	0.8	27.48387097	1270.967742
586	0	8	1	13	431	0.38	0.91	23.42105263	1134.210526
587	0	9	1	14	405	0.46	0.85	17.84782609	880.4347826
588	0	9	1	7	402	0.51	0.84	15.74509804	788.2352941
589	0	0	0	2	208	0.93	0.58	5.279569892	223.655914
590	0	2	0	6	191	0.58	0.48	9.862068966	329.3103448
591	0	5	0	4	256	0.84	0.68	4.547619048	304.7619048
592	0	0	0		212	0.84	0.49	6.928571429	252.3809524
593	0	1	0	1	116	0.46	0.27	10.82608696	252.173913
594	0	3	0	5	170	0.31	0.18	20	548.3870968
595	0	4	0	4	198	0.44	0.2	14.04545455	450
596	0	2	1	6	140	0.45	0.23	8.288888889	311.1111111
597	0	3	1	5	152	0.62	0.23	7.887096774	245.1612903
598	0	4	1	6	163	0.42	0.23	8.595238095	388.0952381
599	0	5	1	8	204	0.59	0.34	11.91525424	345.7627119
600	0	6	1	11	199	0.48	0.36	19.45833333	414.5833333
601	0	7	1	10	209	0.49	0.54	24.95918367	426.5306122
602	0	6	0	1	181	1.04	0.27	2.615384615	174.0384615
603	0	8	0	2	105	0.89	0.18	3.595505618	117.9775281
604	0	9	0	1	213	0.77	0.28	3.779220779	276.6233766
605	0	2	0	2	398	1.15	0.35	4.147826087	346.0869565
606	0	4	0	2	549	1.32	0.57	3.734848485	415.9090909
607	0	6	0	2	672	1.83	0.81	2.409836066	367.2131148
608	0	7	0	1	727	2.11	0.87	2.075829384	344.549763
609	0	2	0	2	279	0.85	1.1	4.705882353	328.2352941
610	0	3	0	3	244	0.67	0.93	6.970149254	364.1791045
611	0	4	0	2	307	0.63	0.67	8.015873016	487.3015873
612	0	0	0		110	1.64	0.19	2.018292683	67.07317073
613	0	2	0		112	1.16	0.16	3.155172414	96.55172414
614	0	6	0	7	247	1.73	0.22	4.398843931	142.7745665
615	0	9	0	10	237	0.92	0.15	6.010869565	257.6086957
616	0	0	0	2	146	0.64	0.3	8.34375	228.125
617	0	16	1	10	420	0.89	0.67	8.191011236	471.9101124
618	0	5	0	1	301	1.5	0.85	3.44	200.6666667
619	0	1	1	2	199	1.11	0.7	4.234234234	179.2792793
620	0	4	0	2	286	1.65	0.69	3.163636364	173.3333333
621	0	5	0	2	330	1.59	0.69	3.339622642	207.5471698
622	0	6	0	2	348	1.69	0.84	2.727810651	205.9171598
623	0	7	0	2	434	1.87	1.1	3.79144385	232.0855615
624	0	1	0	3	323	1.21	0.31	3.933884298	266.9421488
625	0	3	0	2	340	1.41	0.57	1.815602837	241.1347518
626	0	4	0	1	398	1.44	0.6	1.916666667	276.3888889
627	0	0	0	0	200	1.42	0.62	2.077464789	140.8450704
628	0	2	0	2	219	1.23	0.87	4.731707317	178.0487805
629	0	3	0	0	240	1.67	0.88	2.077844311	143.7125749
630	0	5	0	0	319	1.3	0.8	2.976923077	245.3846154
631	0	4	0	3	137	0.71	0.34	6.591549296	192.9577465
632	0	6	0	0	170	0.82	0.48	3.646341463	207.3170732
633	0	7	1	11	273	1.12	0.56	6.258928571	243.75
634	0	8	1	14	298	1.06	0.61	8.424528302	281.1320755
635	0	8	1	15	296	1.04	0.51	8.701923077	284.6153846
636	0	9	1	13	312	1.21	0.88	11.94214876	257.8512397
637	0	9	1	12	320	1.25	0.98	11.272	256
638	0	9	1	12	305	1.24	0.86	11.38709677	245.9677419
639	0	9	1	12	319	1.73	1.01	7.780346821	184.3930636
640	0	10	1	8	293	1.91	1.18	7.078534031	153.4031414
641	0	11	1	10	321	1.84	0.95	8.038043478	174.4565217
642	0	11	1	7	287	1.94	0.87	6.24742268	147.9381443
643	0	11	1	11	253	1.27	0.8	8.440944882	199.2125984
644	0	2	0	6	102	0.91	1.45	3.989010989	112.0879121
645	0	2	0	17	259	0.39	0.85	18	664.1025641
646	0	4	0	9	245	0.44	0.75	15.04545455	556.8181818
647	0	6	0	11	234	0.44	0.91	17.54545455	531.8181818
648	0	2	0	4	258	0.66	1.17	14.45454545	390.9090909
649	0	4	0	5	284	0.99	1.1	8.808080808	286.8686869
650	0	6	0	4	301	0.95	1.19	9.821052632	316.8421053
651	0	3	1	0	185	0.86	0.4	5.662790698	215.1162791
652	0	4	1	3	238	1.08	0.67	6.87037037	220.3703704
653	0	5	1	0	281	0.98	0.58	6.724489796	286.7346939
654	0	15	0	14	310	0.19	0.44	40.15789474	1631.578947
655	0	17	0	8	424	0.51	0.24	12.68627451	831.372549
656	0	4	0	4	103	0.44	0.42	10.52272727	234.0909091
657	0	6	0	4	144	0.52	0.29	5.538461538	276.9230769
658	0	7	0	7	165	0.46	0.39	5.739130435	358.6956522
659	0	25	1	13	143	0.61	0.97	25.06557377	234.4262295
660	0	3	0	2	221	1.7	0.78	1.829411765	130
661	0	4	0	1	263	1.31	1	3.251908397	200.7633588
662	0	2	0	2	145	1.12	0.34	2.857142857	129.4642857
663	0	4	0	0	186	1.06	0.55	3.773584906	175.4716981
664	0	0	0	0	148	1.61	0.53	2.459627329	91.92546584
665	0	2	0	0	149	1.56	0.39	4.737179487	95.51282051
666	0	3	0	0	176	1.25	0.45	6.096	140.8
667	0	4	0	1	206	1.27	0.43	3.582677165	162.2047244
668	0	5	0	0	234	1.42	0.67	3.38028169	164.7887324
669	0	3	0	8	251	0.8	0.58	7.45	313.75
670	0	5	0	3	313	0.77	0.62	6.454545455	406.4935065
671	0	7	0	5	312	0.79	0.58	8.35443038	394.9367089
672	0	2	0	8	185	0.17	0.28	54.52941176	1088.235294
673	0	3	0	7	192	0.28	0.31	23.64285714	685.7142857
674	0	4	0	6	209	0.15	0.29	28.13333333	1393.333333
675	0	6	0	4	286	0.35	0.49	11.11428571	817.1428571
676	0	0	0		158	0.92	0.84	1.706521739	171.7391304
677	0	9	0	0	149	1.25	0.43	0.936	119.2
678	0	12	0	0	189	1.14	0.39	1.254385965	165.7894737
679	0	2	0	1	101	0.99	0.28	7.060606061	102.020202
680	0	3	0	0	112	1.61	0.59	4.242236025	69.56521739
681	0	4	0	2	133	1.28	0.29	7.03125	103.90625
682	0	2	0	4	201	0.74	0.24	2.810810811	271.6216216
683	0	2	0	8	203	0.55	0.26	6.745454545	369.0909091
684	0	3	0		299	0.84	0.38	3.19047619	355.952381
685	0	4	0	3	349	1.04	0.46	2.240384615	335.5769231
686	0	1	0	3	192	0.84	0.36	8.702380952	228.5714286
687	0	1	1		222	0.9	0.71	10.12222222	246.6666667
688	0	3	1	7	253	0.59	0.52	19.05084746	428.8135593
689	0	4	1	6	303	0.6	0.49	17.85	505
690	0	1	1	2	107	0.7	0.4	6.071428571	152.8571429
691	0	2	1	6	117	0.7	0.26	9.057142857	167.1428571
692	0	1	1		200	0.75	0.48	11.10666667	266.6666667
693	0	2	1	6	208	0.92	0.46	7.423913043	226.0869565
694	0	3	1		248	0.81	0.48	8.765432099	306.1728395
695	0	3	1	8	238	0.76	0.48	9.486842105	313.1578947
696	0	4	1	7	280	0.84	0.51	8.869047619	333.3333333
697	0	1	0		205	0.66	0.55	9.257575758	310.6060606
698	0	3	0	3	263	0.95	0.91	5.357894737	276.8421053
699	0	4	0	2	315	1.03	0.96	3.834951456	305.8252427
700	0	2	0	4	332	0.7	0.99	8.028571429	474.2857143
701	0	3	0	5	335	0.78	1.18	7.064102564	429.4871795
702	0	4	0	2	347	1.05	1.23	5.142857143	330.4761905
703	0	2	0	9	184	0.43	0.22	7.76744186	427.9069767
704	0	3	0	4	200	0.39	0.24	7.307692308	512.8205128
705	0	2	0	2	116	1.19	0.33	1.638655462	97.4789916
706	0	3	0	1	125	1.19	0.38	1.672268908	105.0420168
707	0	4	0	3	126	1.17	0.28	1.820512821	107.6923077
708	0	2	0	0	330	2.17	0.85	3.110599078	152.0737327
709	0	3	0	0	393	2.2	0.68	2.659090909	178.6363636
710	0	4	0	0	431	2.1	0.6	2.452380952	205.2380952
711	0	2	1	9	220	0.87	0.4	13.77011494	252.8735632
712	0	2	0	1	164	1.34	0.31	1.746268657	122.3880597
715	0	1	0	2	129	0.97	0.2	1.711340206	132.9896907
716	0	2	0		102	1	0.2	2.03	102
717	0	4	0	5	86	0.7	0.11	2.871428571	122.8571429
718	0	7	0	6	166	0.91	0.16	4.736263736	182.4175824
719	0	9	0		195	0.9	0.3	4.277777778	216.6666667
720	0	2	1	13	299	0.39	0.44	19.46153846	766.6666667
721	0	3	1	13	261	0.47	0.48	17.10638298	555.3191489
722	0	4	1	15	274	0.77	0.85	11.77922078	355.8441558
723	0	5	1	14	340	0.82	0.95	12.25609756	414.6341463
724	0	6	1	12	408	1	1	9.67	408
725	0	9	1	10	639	0.92	0.95	11.25	694.5652174
726	0	10	1	9	696	1.02	0.86	8.725490196	682.3529412
727	0	11	1	7	779	1.11	0.94	9.144144144	701.8018018
728	0	12	1	2	831	1.79	1.68	6.558659218	464.2458101
729	0	13	1	9	801	1.12	1.61	9.616071429	715.1785714
730	0	0	1	10	349	0.49	0.35	18.75510204	712.244898
731	0	0	0	5	292	0.79	0.27	14.67088608	369.6202532
732	0	3	0	5	421	1.93	0.59	3.155440415	218.134715
733	0	0	0	1	181	0.65	0.46	5.307692308	278.4615385
734	0	1	0	0	183	0.84	0.48	3.428571429	217.8571429
735	0	0	0	0	130	0.89	0.4	2.842696629	146.0674157
736	0	4	0	2	134	0.92	0.35	1.869565217	145.6521739
737	0	3	0	1	243	6.48	0.42	0.859567901	37.5
738	0	2	0	3	349	1.39	0.3	1.122302158	251.0791367
739	0	0	1	15	365	0.37	0.38	30.64864865	986.4864865
740	0	1	1	10	391	0.5	0.42	13.64	782
741	0	2	1	16	349	0.23	0.24	37.86956522	1517.391304
742	0	3	1	14	384	0.43	0.23	16.72093023	893.0232558
743	0	4	1	12	440	0.45	0.34	18.86666667	977.7777778
744	0	1	0	2	250	0.53	0.29	16.30188679	471.6981132
745	0	2	1		144	0.67	0.49	17.92537313	214.9253731
746	0	3	1	18	131	0.98	0.73	13.96938776	133.6734694
747	0	0	0	9	242	0.83	1.14	12.26506024	291.5662651
748	0	1	0	8	208	0.74	1.28	11.62162162	281.0810811
749	0	2	0	7	192	0.91	1.03	7.725274725	210.989011
750	0	3	0	6	189	0.9	0.94	7.177777778	210
751	0	0	0	3	245	0.22	0.33	15.95454545	1113.636364
752	0	8	1	20	150	0.49	0.19	7.326530612	306.122449
753	0	9	1	14	133	0.52	0.18	7.192307692	255.7692308
754	0	10	1	14	116	0.36	0.18	10.80555556	322.2222222
755	0	11	1	13	141	0.58	0.18	7.844827586	243.1034483
756	0	14	1	13	308	0.67	0.42	8.417910448	459.7014925
757	0	15	1	11	378	0.74	0.5	8.337837838	510.8108108
758	0	16	1	7	515	1.18	0.74	5.228813559	436.440678
759	0	17	1	3	578	1.14	0.83	6.342105263	507.0175439
760	0	18	1	3	637	1.08	0.95	6.712962963	589.8148148
761	0	0	1	2	174	1.71	1.19	6.614035088	101.754386
762	0	0	1	7	160	1.1	1.27	13.18181818	145.4545455
763	0	5	1	8	376	1.08	0.34	3.861111111	348.1481481
764	0	6	1	7	406	1.4	0.47	2.964285714	290
765	0	7	1	8	457	2.04	0.55	2.774509804	224.0196078
766	0	2	0	3	350	1.54	1.3	5.103896104	227.2727273
767	0	3	0		359	1.65	1.29	5.296969697	217.5757576
768	0	10	1	1	409	1.31	1.02	6.564885496	312.2137405
769	0	11	1	0	502	2.74	1.54	3.693430657	183.2116788
770	0	12	1	1	482	1.4	0.86	3.964285714	344.2857143
771	0	13	1	1	555	1.09	0.76	7.128440367	509.1743119
772	0	14	1	0	513	1.53	0.67	3.183006536	335.2941176
773	0	19	1	0	509	1.46	0.93	3.746575342	348.630137
774	0	20	1	0	496	1.45	0.44	3.986206897	342.0689655
775	0	21	1	0	475	2.53	0.9	2.166007905	187.7470356
776	0	1	1	0	170	1.72	0.93	4.395348837	98.8372093
777	0	0	0	4	74	0.28	0.25	15.82142857	264.2857143
778	0	3	0	0	198	0.9	0.58	5.1	220
779	0	0	0	0	316	1.12	0.42	5.8125	282.1428571
780	0	0	0	0	112	3.13	1.96	3.603833866	35.7827476
781	0	9	1	11	462	0.74	0.98	13.60810811	624.3243243
782	0	12	1	11	641	0.77	1.2	17.80519481	832.4675325
783	0	13	1	8	685	0.76	0.96	14.32894737	901.3157895
784	0	14	1	8	630	0.79	0.8	11.50632911	797.4683544
785	0	15	1	10	826	0.59	1.04	21.66101695	1400
786	0	16	1	8	699	0.72	0.9	14.76388889	970.8333333
787	0	21	1	13	627	0.25	0.85	54.24	2508
788	0	22	1	12	661	0.49	0.89	44.59183673	1348.979592
789	0	23	1	11	462	0.52	1.04	49.09615385	888.4615385
790	0	0	0	3	239	1.16	1.15	9.034482759	206.0344828
791	0	3	0	4	202	1.04	0.3	3.721153846	194.2307692
792	0	0	0	5	346	0.76	1.17	15.81578947	455.2631579
793	0	2	1	6	115	0.55	0.56	4.709090909	209.0909091
794	0	0	0	0	186	1.16	0.28	5.068965517	160.3448276
795	0	3	0	6	212	1.17	0.25	4.846153846	181.1965812
796	0	10	0	4	266	1.32	0.64	3.333333333	201.5151515
797	0	11	0	0	371	2.22	0.61	2.22972973	167.1171171
798	0	3	1	8	71	0.15	0.07	14.26666667	473.3333333
799	0	6	1	7	86	0.2	0.11	2.65	430
800	0	4	1	6	332	1.43	0.65	6.671328671	232.1678322
801	0	4	1	9	293	1.14	0.47	8.01754386	257.0175439
802	0	5	1	3	420	1.2	0.58	6.033333333	350
803	0	6	1	8	494	0.93	0.6	7.774193548	531.1827957
804	0	7	1	5	561	0.96	0.47	5.385416667	584.375
805	0	12	1	1	660	2.55	1.18	5.521568627	258.8235294
806	0	13	1	1	585	1.88	1.34	7.175531915	311.1702128
807	0	14	1	1	533	1.95	0.95	4.487179487	273.3333333
808	0	15	1	0	489	1.9	0.9	3.852631579	257.3684211
809	0	5	1	3	351	0.88	0.34	6.159090909	398.8636364
810	0	8	1	2	484	1.24	0.43	4.548387097	390.3225806
811	0	9	1	5	588	1.27	0.63	4.401574803	462.992126
812	0	10	1	6	658	1.38	0.77	4.905797101	476.8115942
813	0	11	1	6	786	1.53	1.03	4.967320261	513.7254902
814	0	12	1	5	668	1.43	0.92	5.118881119	467.1328671
815	0	17	1	0	734	1.81	0.65	3.243093923	405.5248619
816	0	18	1	0	822	1.72	0.68	4.296511628	477.9069767
817	0	19	1	0	732	1.73	0.8	3.971098266	423.1213873
818	0	5	0	0	431	1.72	0.49	1.546511628	250.5813953
819	0	0	0	0	131	0.69	0.19	4.333333333	189.8550725
820	0	2	0	0	157	1.24	0.31	1.612903226	126.6129032
821	0	2	1	11	283	1.24	0.28	4.653225806	228.2258065
822	0	3	1	8	271	0.83	0.25	6.614457831	326.5060241
823	0	4	1	10	347	1	0.31	4.67	347
824	0	3	0	0	254	0.79	0.43	4.46835443	321.5189873
825	0	1	1	3	336	0.49	0.34	16.46938776	685.7142857
826	0	5	1	8	541	0.5	0.56	14.44	1082
827	0	6	1	12	544	0.31	0.62	20.96774194	1754.83871
828	0	7	1	12	504	0.34	0.75	18.17647059	1482.352941
829	0	8	1	14	465	0.44	0.69	16.56818182	1056.818182
830	0	11	1	12	679	0.45	0.97	34.26666667	1508.888889
831	0	12	1	15	710	0.4	1.17	28.95	1775
832	0	13	1	10	701	0.47	1.13	17.9787234	1491.489362
833	0	14	1	9	861	0.5	1.19	16.42	1722
834	0	15	1	8	962	0.65	0.88	11.69230769	1480
835	0	2	1	1	96	0.99	0.13	1.595959596	96.96969697
836	0	5	1	1	195	0.74	0.3	3.310810811	263.5135135
837	0	6	1	1	228	0.96	0.42	2.770833333	237.5
838	0	7	1	8	302	0.95	0.47	4.073684211	317.8947368
839	0	8	1	9	358	0.92	0.66	4.945652174	389.1304348
840	0	9	1	8	413	0.66	0.65	7.136363636	625.7575758
841	0	12	1	4	409	1.38	0.74	4.369565217	296.3768116
842	0	13	1	5	383	1.23	0.61	4.764227642	311.3821138
843	0	14	1	2	423	1.42	0.75	4.535211268	297.8873239
844	0	15	1	5	460	1.19	1.13	8.277310924	386.5546218
845	0	16	1	2	432	1.26	1.19	6.484126984	342.8571429
846	0	0	0	2	187	0.88	0.54	5.443181818	212.5
847	0	0	0	0	232	2.27	0.3	1.259911894	102.2026432
848	0	1	0	2	208	0.95	0.35	6.2	218.9473684
849	0	3	0	2	272	1	0.57	6.2	272
850	0	9	0	2	523	1.74	0.67	4.103448276	300.5747126
851	0	1	1	1	199	1.11	0.16	4.567567568	179.2792793
852	0	2	1	1	214	1.57	0.22	3.630573248	136.3057325
853	0	3	1	2	300	1.36	0.34	5.977941176	220.5882353
854	0	4	1	1	341	1.3	0.39	6.630769231	262.3076923
855	0	7	1	5	485	1.9	0.62	3.463157895	255.2631579
856	0	8	1	5	527	2.17	0.73	3.585253456	242.8571429
857	0	9	1	11	437	2.53	0.64	2.304347826	172.7272727
858	0	10	1	4	650	1.46	0.78	7.431506849	445.2054795
859	0	10	1	4	616	1.78	0.7	5.91011236	346.0674157
860	0	11	1	4	625	1.53	0.6	6.490196078	408.496732
861	0	1	1	3	235	0.62	0.48	13.06451613	379.0322581
862	0	2	1	11	192	0.31	0.58	20.87096774	619.3548387
863	0	9	1	10	260	0.33	0.5	22.63636364	787.8787879
864	0	10	1	5	265	0.59	0.4	9.542372881	449.1525424
865	0	11	1	5	387	0.5	0.46	13.98	774
866	0	0	0	0	246	3.3	0.58	1.16969697	74.54545455
867	0	2	0	6	186	0.41	0.3	17.68292683	453.6585366
868	0	4	0	3	372	1.23	0.34	3.430894309	302.4390244
869	0	6	0	0	490	1.23	0.33	3.268292683	398.3739837
870	0	0	0	2	171	0.98	0.54	11.55102041	174.4897959
871	0	5	0	3	459	1.6	1.1	6.0125	286.875
872	0	6	0	7	579	2.1	1.16	4.828571429	275.7142857
873	0	7	0	7	545	2.14	1.05	3.925233645	254.6728972
874	0	8	0	7	521	1.85	1.15	5.583783784	281.6216216
875	0	9	0	3	529	1.92	1.14	6.265625	275.5208333
876	0	3	0	1	295	1.1	0.17	4.227272727	268.1818182
877	0	0	0	1	265	1.35	0.51	6.377777778	196.2962963
878	0	2	0	3	361	1.71	0.56	4.935672515	211.1111111
879	0	10	1	1	377	1.3	0.59	3.423076923	290
880	0	3	0	3	282	0.56	0.45	7.696428571	503.5714286
881	0	5	0	1	369	0.76	0.61	5.210526316	485.5263158
882	0	8	0	1	484	1.14	0.6	2.947368421	424.5614035
883	0	0	0	1	160	0.64	0.41	6.5625	250
884	0	0	0	0	352	4.24	0.75	1.716981132	83.01886792
885	0	5	0	4	269	0.72	0.55	5.222222222	373.6111111
886	0	0	0	3	155	0.69	0.56	5.942028986	224.6376812
887	0	0	0	5	427	0.54	0.54	21.35185185	790.7407407
888	0	0	0	1	362	0.34	0.33	10.02941176	1064.705882
889	0	2	0	2	344	0.28	0.22	11.85714286	1228.571429
890	0	6	0	6	414	0.46	0.41	9.782608696	900
891	0	0	0	0	530	1.74	0.64	2.603448276	304.5977011
892	0	0	0	1	620	2.16	0.69	2.046296296	287.037037
893	0	0	1	6	57	0.82	0.32	8.109756098	69.51219512
894	0	1	1	7	107	0.56	0.17	13.58928571	191.0714286
895	0	2	1	15	59	0.6	0.39	24.91666667	98.33333333
896	0	5	1	8	38	1.05	0.67	6.142857143	36.19047619
897	0	6	1	8	51	1.38	0.59	4.797101449	36.95652174
898	0	7	1	7	52	1.31	0.62	4.900763359	39.69465649
899	0	8	1	8	70	1.39	0.81	4.294964029	50.35971223
900	0	9	1	8	78	1.22	0.72	5.885245902	63.93442623
901	0	0	1	5	381	0.78	0.25	9.935897436	488.4615385
902	0	2	1	8	319	0.78	0.29	12.91025641	408.974359
903	0	3	1	12	274	0.85	0.54	12.8	322.3529412
904	0	6	1	16	268	0.89	1.2	13.59550562	301.1235955
905	0	7	1	18	275	0.88	1.18	15.93181818	312.5
906	0	8	1	17	278	1.1	1.24	13.88181818	252.7272727
907	0	9	1	16	247	1.04	1.38	16.43269231	237.5
908	0	10	1	15	250	1.55	1.84	12.45806452	161.2903226
909	0	0	0	0	130	0.54	0.21	2.351851852	240.7407407
910	0	0	0	0	173	1.78	0.62	2.061797753	97.19101124
911	0	2	0	2	178	1.05	0.59	4.266666667	169.5238095
912	0	2	1	4	203	0.64	0.15	5.625	317.1875
913	0	4	0	11	187	1.21	0.29	3.636363636	154.5454545
914	0	1	1	12	248	1.37	0.55	4.99270073	181.0218978
915	0	2	1	16	286	1.24	0.67	7.85483871	230.6451613
916	0	5	1	12	384	2.25	1.01	4.546666667	170.6666667
917	0	6	1	12	413	2.27	0.73	3.572687225	181.938326
918	0	7	1	3	560	1.61	0.65	4.602484472	347.826087
919	0	8	1	8	538	3.2	1.03	2.975	168.125
920	0	8	1	8	533	3.7	0.99	2.527027027	144.0540541
921	0	1	1	3	93	0.45	1.04	11.8	206.6666667
922	0	0	0	1	206	0.93	0.76	4.430107527	221.5053763
923	0	1	0	2	212	0.7	0.64	4.914285714	302.8571429
924	0	4	0	5	160	1.86	0.65	3.037634409	86.02150538
925	0	1	0	2	462	1.34	1.05	6.962686567	344.7761194
926	0	2	0	5	128	0.44	0.29	6.659090909	290.9090909
927	0	6	0	4	193	0.83	0.67	4.698795181	232.5301205
928	0	2	0	10	239	0.55	0.19	10.89090909	434.5454545
929	0	6	0	3	366	0.96	0.42	6.489583333	381.25
930	0	10	0	5	644	0.95	0.56	8.336842105	677.8947368
931	0	0	1	13	387	0.32	0.47	41.65625	1209.375
932	0	2	1	6	335	0.78	0.22	6.679487179	429.4871795
933	0	5	1	5	476	0.76	0.54	8.315789474	626.3157895
934	0	5	0	1	180	0.7	0.53	5.428571429	257.1428571
935	0	2	0	0	158	0.4	0.2	2.525	395
936	0	2	0	2	231	1.64	0.52	3.548780488	140.8536585
937	0	2	0	0	260	1.25	1.01	6.008	208
938	0	2	0	1	282	1.4	0.44	2.5	201.4285714
939	0	5	0	0	363	0.88	0.6	4.613636364	412.5
940	0	6	0	6	379	0.81	0.75	13.82716049	467.9012346
941	0	2	0	4	256	0.9	1.04	10.32222222	284.4444444
942	0	0	0	1	251	0.46	0.64	13.52173913	545.6521739
943	0	1	0	1	210	0.59	0.4	6.677966102	355.9322034
944	0	4	0	5	239	0.88	0.32	6.5	271.5909091
945	0	4	1	9	107	0.69	0.47	7.869565217	155.0724638
946	0	5	1	5	80	0.9	0.58	5.011111111	88.88888889
947	0	6	1	6	61	0.97	0.58	4.402061856	62.88659794
948	0	7	1	3	72	1	0.61	5.22	72
949	0	8	1	4	104	1.23	0.79	5.544715447	84.55284553
950	0	3	0	7	124	1.25	0.41	2.56	99.2
951	0	2	0	4	358	1.07	0.7	9.420560748	334.5794393
952	0	2	0	4	341	1.42	0.27	4.422535211	240.1408451
953	0	2	1	0	180	1.23	0.51	3.951219512	146.3414634
954	0	5	1	5	152	0.79	0.23	12.32911392	192.4050633
955	0	5	1	3	183	1.56	0.37	6.782051282	117.3076923
956	0	6	1	5	139	0.88	0.12	8.431818182	157.9545455
957	0	0	1	4	288	0.7	0.37	9.371428571	411.4285714
958	0	2	1	10	329	0.83	0.39	10.30120482	396.3855422
959	0	3	1	8	337	0.95	0.34	7.842105263	354.7368421
960	0	4	1	3	356	1.71	0.31	4.432748538	208.1871345
961	0	2	0	1	160	0.5	0.31	7.84	320
962	0	6	0	10	223	0.27	0.17	34.74074074	825.9259259
963	0	7	0	11	238	0.21	0.2	43.52380952	1133.333333
964	0	9	0	16	306	0.29	0.2	26.03448276	1055.172414
965	0	13	0	12	446	0.47	0.28	21.9787234	948.9361702
966	0	0	0	0	141	1.04	0.55	4.288461538	135.5769231
967	0	3	0	2	201	0.72	0.8	7	279.1666667
968	0	2	0	7	365	1.1	0.7	4.090909091	331.8181818
969	0	5	0	8	665	1.36	0.82	3.316176471	488.9705882
970	0	0	0	3	284	0.53	0.34	9.452830189	535.8490566
971	0	2	0		338	0.37	0.39	17.67567568	913.5135135
972	0	0	0	1	146	0.5	0.31	8.6	292
973	0	2	1	1	317	0.46	0.12	7.52173913	689.1304348
974	0	5	1	3	438	1.02	0.16	4.549019608	429.4117647
975	0	6	1	11	494	1.17	0.23	4.897435897	422.2222222
976	0	0	1	1	277	0.63	0.27	7.476190476	439.6825397
977	0	3	1	8	321	0.59	0.25	12.45762712	544.0677966
978	0	4	1	8	372	0.59	0.42	15.71186441	630.5084746
979	0	5	1	6	457	0.5	0.49	13.96	914
980	0	6	1	9	510	0.6	0.61	11.18333333	850
981	0	7	1	6	584	0.81	0.69	8.345679012	720.9876543
982	0	1	0		291	1.35	0.26	4.022222222	215.5555556
983	0	1	0	1	167	1.02	0.26	5.81372549	163.7254902
984	0	0	0	4	216	0.87	0.42	5.643678161	248.2758621
985	0	1	0		197	0.97	0.29	4.443298969	203.0927835
986	0	0	0	1	593	2.32	0.82	3.422413793	255.6034483
987	0	1	0		546	2.21	0.98	3.515837104	247.0588235
988	0	2	0		586	2.15	0.91	4.162790698	272.5581395
989	0	4	0		530	1.79	0.96	4.854748603	296.0893855
990	0	7	0		537	1.94	0.98	3.345360825	276.8041237
991	0	9	0		529	2.12	0.83	2.811320755	249.5283019
992	0	13	0		315	0.99	0.44	7.444444444	318.1818182
993	0	14	0		262	0.71	0.25	7.704225352	369.0140845
994	0	17	0		302	0.54	0.26	9.796296296	559.2592593
995	0	18	0		349	0.59	0.29	7.542372881	591.5254237
996	0	19	0		468	0.39	0.39	15.87179487	1200
997	0	21	0		523	0.5	0.31	8.66	1046
998	0	24	0		703	0.51	0.47	10.62745098	1378.431373
999	0	26	0		806	1.36	0.9	4.830882353	592.6470588
1000	0	0	0		332	0.82	0.49	4.012195122	404.8780488
1001	0	2	0		382	0.65	0.43	6.6	587.6923077
1002	0	3	0		461	0.95	0.5	4.873684211	485.2631579
1003	0	0	1		166	0.54	0.32	11.2962963	307.4074074
1004	0	1	1		158	0.94	0.28	4.946808511	168.0851064
1005	0	0	1		137	1.27	0.37	4.724409449	107.8740157
1006	0	0	1		127	0.66	0.3	8.909090909	192.4242424
1007	0	0	1	8	178	0.38	0.37	31.81578947	468.4210526
1008	0	1	1		174	0.37	0.67	28.18918919	470.2702703
1009	0	2	1		216	0.37	0.57	30.91891892	583.7837838
1010	0	0	1	7	172	0.67	0.73	14.3880597	256.7164179
1011	0	2	1		183	0.35	0.38	31.8	522.8571429
1012	0	4	1		261	0.57	0.42	22.45614035	457.8947368
1013	0	0	0	2	267	0.72	0.39	6.430555556	370.8333333
1014	0	1	0		278	0.75	0.22	5.6	370.6666667
1015	0	5	0		537	0.57	0.46	11.80701754	942.1052632
1016	0	7	0		604	0.56	0.49	14.19642857	1078.571429
1017	0	12	1		142	1.19	0.2	15.64705882	119.3277311
1018	0	0	1		118	0.97	0.74	3.134020619	121.6494845
1019	0	0	1	7	225	0.68	0.26	15.20588235	330.8823529
1020	0	1	1		244	0.74	0.18	12.72972973	329.7297297
1021	0	0	0		141	1.43	0.27	1.496503497	98.6013986
1022	0	3	0		156	0.81	0.26	5.148148148	192.5925926
1023	0	4	0		202	1.04	0.34	6.778846154	194.2307692
1024	0	6	0		296	1.22	0.41	2.631147541	242.6229508
1025	0	0	1	0	217	0.86	0.65	4.127906977	252.3255814
1026	0	1	1		223	1.37	0.47	1.708029197	162.7737226
1027	0	2	1		192	1.12	0.38	2.4375	171.4285714
1028	0	5	1		204	1.22	0.36	2.204918033	167.2131148
1029	0	8	1		338	1.23	0.57	4.471544715	274.796748
1030	0	11	1		444	1.29	1.29	6.689922481	344.1860465
1031	0	1	1		180	0.55	0.2	12.50909091	327.2727273
1032	0	0	0	0	104	0.83	0.56	3.939759036	125.3012048
1033	0	0	0		282	1.02	1.42	20.35294118	276.4705882
1034	0	1	0		205	0.77	0.91	24.12987013	266.2337662
1035	0	3	0	5	255	2.16	1.11	5.240740741	118.0555556
1036	0	0	0	0	344	0.83	0.73	5.879518072	414.4578313
1037	0	1	0		343	0.99	0.62	4	346.4646465
1038	0	2	0		396	0.81	0.37	3.271604938	488.8888889
1039	0	0	0	10	338	0.57	0.13	11.68421053	592.9824561
1040	0	1	0		342	0.46	0.19	12.60869565	743.4782609
1041	0	3	0		386	0.55	0.24	9.672727273	701.8181818
1042	0	5	0		497	0.61	0.48	13.75409836	814.7540984
1043	0	7	0		602	0.93	0.71	11.8172043	647.311828
1044	0	8	0		268	0.51	0.7	15.58823529	525.4901961
1045	0	11	0		236	1.23	0.63	7.390243902	191.8699187
1046	0	0	1	1	221	1.36	0.39	3.257352941	162.5
1047	0	0	1	5	239	0.76	0.5	7.960526316	314.4736842
1048	0	2	1		245	0.65	0.84	11.64615385	376.9230769
1049	0	0	0	1	186	1.1	0.55	1.754545455	169.0909091
1050	0	2	0		200	0.74	0.34	3.783783784	270.2702703
1051	0	4	0		253	0.87	0.4	3.666666667	290.8045977
1052	0	0	1	6	239	0.54	0.52	13.09259259	442.5925926
1053	0	2	1		325	1.2	1.49	7.058333333	270.8333333
1054	0	2	0	0	188	1.05	0.44	3.314285714	179.047619
1055	0	0	0	3	335	1.02	0.38	7.421568627	328.4313725
1056	0	1	0		260	0.67	0.39	11.71641791	388.0597015
1057	0	3	0		304	1.09	0.46	4.80733945	278.8990826
1058	0	0	1		180	1.77	0.54	3.050847458	101.6949153
1059	0	1	1		170	2.68	0.59	2.070895522	63.43283582
1060	0	2	1		177	1.92	0.62	3.828125	92.1875
1061	0	3	1		185	2.03	0.68	5.374384236	91.13300493
1062	0	6	1		350	1.89	0.79	8.497354497	185.1851852
1063	0	0	1	4	153	0.32	0.32	13.90625	478.125
1064	0	2	1		134	0.45	0.3	6.288888889	297.7777778
1065	0	4	1		165	0.53	0.33	6.377358491	311.3207547
1066	0	5	1		216	0.41	0.43	15.02439024	526.8292683
1067	0	0	1	7	355	1.23	0.65	4.073170732	288.6178862
1068	0	1	1		333	0.73	0.69	5.630136986	456.1643836
1069	0	0	0		115	0.89	0.16	2.93258427	129.2134831
1070	0	1	0		114	0.49	0.12	6.244897959	232.6530612
1071	0	6	0		236	0.84	0.28	3.797619048	280.952381
1072	0	8	0		268	1.12	0.39	3.241071429	239.2857143
1073	0	10	0		232	1.3	0.44	2.738461538	178.4615385
1074	0	13	0		182	0.99	0.39	3.505050505	183.8383838
1075	0	2	1		186	0.99	0.51	2.202020202	187.8787879
1076	0	6	1		219	1.42	0.6	1.690140845	154.2253521
1077	0	8	1		297	1.64	0.72	2.670731707	181.097561
1078	0	11	1		362	1.21	0.81	4.553719008	299.1735537
1079	0	18	1		331	1.1	1.02	4.627272727	300.9090909
1080	0	20	1		383	1.12	1.08	6.098214286	341.9642857
1081	0	1	0		231	0.36	0.14	12.36111111	641.6666667
1082	0	3	0		315	0.44	0.29	12	715.9090909
1083	0	6	0		478	0.69	0.34	8.15942029	692.7536232
1084	0	8	0		507	0.86	0.44	6.197674419	589.5348837
1085	0	10	0		477	0.73	0.41	7.98630137	653.4246575
1086	0	13	0		505	0.73	0.47	6.082191781	691.7808219
1087	0	0	0	4	157	1.06	0.73	8.783018868	148.1132075
1088	0	2	0		207	1.05	0.65	2.933333333	197.1428571
1089	0	0	0	2	201	0.73	0.36	13.94520548	275.3424658
1090	0	1	0		265	0.74	0.34	17.72972973	358.1081081
1091	0	4	0		448	0.8	0.56	10.9625	560
1092	0	6	0		565	1.02	1.01	10.07843137	553.9215686
1093	0	8	0		750	1.52	0.71	5.776315789	493.4210526
1094	0	0	0	12	268	0.48	0.32	21.45833333	558.3333333
1095	0	2	0		245	0.79	0.27	7.759493671	310.1265823
1096	0	3	0		403	1	0.29	8.86	403
1097	0	5	0		399	1.08	0.22	8.509259259	369.4444444
1098	0	0	0		334	1.38	0.82	5.391304348	242.0289855
1099	0	0	1		249	1.04	1.12	17.28846154	239.4230769
1100	0	0	1	1	172	0.62	0.28	10.35483871	277.4193548
1101	0	4	1		250	0.49	0.26	19.30612245	510.2040816
1102	0	6	1		227	0.34	0.31	23	667.6470588
1103	0	8	1		223	0.41	0.25	20.63414634	543.902439
1104	0	7	0		515	1.13	0.53	7.530973451	455.7522124
1105	0	10	0		541	1.87	0.56	4.28342246	289.3048128
1106	0	0	1	4	228	1.59	0.48	4.459119497	143.3962264
1107	0	2	1		229	0.85	0.53	6.811764706	269.4117647
1108	0	4	1		309	0.77	0.95	14.7012987	401.2987013
1109	0	0	0		183	0.49	0.08	17.12244898	373.4693878
1110	0	4	0		261	1.64	1.22	4.042682927	159.1463415
1111	0	1	0		130	0.68	0.28	3.5	191.1764706
1112	0	3	0		163	0.75	0.26	4.56	217.3333333
1113	0	5	0		167	0.8	0.38	4.35	208.75
1114	0	8	0		223	0.68	0.51	6.088235294	327.9411765
1115	0	10	0		285	0.93	0.64	3.903225806	306.4516129
1116	0	12	0		292	1.33	0.73	3.609022556	219.5488722
1117	0	0	0	0	247	0.85	0.48	5.458823529	290.5882353
1118	0	1	0		246	1.04	0.5	3.355769231	236.5384615
1119	0	0	1	10	243	0.51	0.68	13.03921569	476.4705882
1120	0	0	1		113	0.55	0.39	3.8	205.4545455
1121	0	2	1		110	0.64	0.18	5.046875	171.875
1122	0	0	0	2	236	0.47	0.4	6.276595745	502.1276596
1123	0	3	0		308	0.65	0.63	8.092307692	473.8461538
1124	0	1	0		230	0.65	0.35	3.6	353.8461538
1125	0	0	1	4	317	0.63	0.47	7.825396825	503.1746032
1126	0	0	0	1	430	1.44	0.64	4.104166667	298.6111111
1127	0	1	0		472	1.41	0.52	3.503546099	334.751773
1128	0	3	0		488	1.14	0.67	5.131578947	428.0701754
1129	0	0	0	4	507	0.96	0.62	9.8125	528.125
1130	0	3	0		421	1.58	0.57	3.474683544	266.4556962
1131	0	0	0	2	112	0.45	0.31	14.28888889	248.8888889
1132	0	0	0	1	218	0.71	0.24	4.957746479	307.0422535
1133	0	0	1	6	278	1.26	1.14	7.444444444	220.6349206
1134	0	1	1		296	1.66	1.15	6.530120482	178.313253
1135	0	0	0	3	130	0.5	0.56	2.62	260
1136	0	1	0		111	0.5	0.49	1.62	222
1137	0	0	0		227	1.54	0.61	2.707792208	147.4025974
1138	0	0	0	0	105	0.9	0.66	3.911111111	116.6666667
1139	0	1	0		120	1.02	0.58	4.225490196	117.6470588
1140	0	4	0		212	0.91	0.58	6.032967033	232.967033
1141	0	0	1		236	1.55	0.61	8.987096774	152.2580645
1143	0	11	1		257	0.51	0.37	25.62745098	503.9215686
1144	0	13	1		364	0.53	0.65	39.35849057	686.7924528
1145	0	0	1		374	1.28	1.01	6.359375	292.1875
1146	0	1	1		301	1.81	0.76	2.922651934	166.2983425
1147	0	3	1		270	1.74	0.46	3.316091954	155.1724138
1148	0	3	0		402	1.09	0.51	4.28440367	368.8073394
1149	0	5	0		441	1.29	0.56	3.465116279	341.8604651
1150	0	0	1	1	131	0.66	0.27	4.606060606	198.4848485
1151	0	0	0	4	187	0.52	0.39	5.692307692	359.6153846
1152	0	1	0		187	0.58	0.45	7.224137931	322.4137931
1153	0	0	1	3	211	0.55	0.57	11.94545455	383.6363636
1154	0	4	1		368	0.46	0.26	17.97826087	800
1155	0	6	1		392	0.44	0.19	25.38636364	890.9090909
1156	0	8	1		373	0.35	0.35	31.6	1065.714286
1157	0	10	1		360	0.5	0.96	34.36	720
1158	0	0	0	0	157	0.84	0.39	4.238095238	186.9047619
1159	0	1	0		161	0.78	0.34	3.705128205	206.4102564
1160	0	4	0		237	1.38	0.52	2.847826087	171.7391304
1161	0	0	0	4	198	1.31	0.11	2.41221374	151.1450382
1162	0	2	0		251	1.05	0.13	3.276190476	239.047619
1163	0	4	0		407	1.04	0.18	4.336538462	391.3461538
1164	0	7	0		620	2.35	0.47	2.472340426	263.8297872
1165	0	0	0	0	220	1.8	0.67	6.633333333	122.2222222
1166	0	1	0		189	1.72	0.64	5.715116279	109.8837209
1167	0	4	0		212	1.12	0.7	3.767857143	189.2857143
1168	0	6	0		273	1.11	0.86	4.018018018	245.9459459
1169	0	0	0	3	222	1.29	0.23	6.92248062	172.0930233
1170	0	0	0	4	140	0.97	0.3	7.329896907	144.3298969
1171	0	2	1		568	0.53	0.48	17.77358491	1071.698113
1172	0	0	0	2	179	0.65	0.62	5.030769231	275.3846154
1173	0	1	0		156	0.47	0.4	6.085106383	331.9148936
1174	0	0	0	1	192	0.69	0.68	5.565217391	278.2608696
1175	0	2	0		252	1.34	0.6	4.664179104	188.0597015
1176	0	5	0		254	0.55	0.84	16.34545455	461.8181818
1177	0	7	0		302	0.86	0.93	11.56976744	351.1627907
1178	0	9	0		286	0.86	0.64	11.04651163	332.5581395
1179	0	0	0	0	173	1.43	0.29	1.881118881	120.979021
1180	0	3	0		236	1.36	0.33	2.919117647	173.5294118
1181	0	0	1	5	204	0.79	0.79	16.94936709	258.2278481
1182	0	1	1		135	0.44	0.59	29.04545455	306.8181818
1183	0	3	1		166	0.48	0.8	22.97916667	345.8333333
1184	0	5	1		156	0.35	0.32	44.6	445.7142857
1185	0	0	1		146	0.27	0.67	21.92592593	540.7407407
1186	0	2	1		105	0.2	0.32	18.05	525
1187	0	4	1		109	0.2	0.26	12.7	545
1188	0	7	1		153	0.27	0.31	16.88888889	566.6666667
1189	0	0	0	2	286	1.03	0.75	8.902912621	277.6699029
1190	0	4	0		409	1.52	0.62	3.861842105	269.0789474
1191	0	4	0		336	1.22	0.76	4.959016393	275.4098361
1192	0	7	0		544	2.18	0.62	1.733944954	249.5412844
1193	0	1	1		258	0.56	0.39	11.21428571	460.7142857
1194	0	2	1		262	0.63	0.32	10.07936508	415.8730159
1195	0	3	1		302	0.58	0.35	12.44827586	520.6896552
1196	0	6	1		428	0.66	0.35	7.46969697	648.4848485
1197	0	8	1		457	0.79	0.48	6.987341772	578.4810127
1198	0	10	1		428	0.86	0.49	5.476744186	497.6744186
1199	0	0	0	5	168	0.76	1	11.57894737	221.0526316
1200	0	1	0		235	1.37	1.42	7.138686131	171.5328467
1201	0	0	0	3	180	0.74	0.52	8.391891892	243.2432432
1202	0	1	0		222	1.43	0.48	1.72027972	155.2447552
1203	0	0	0	2	310	1.06	0.63	2.726415094	292.4528302
1204	0	2	0		396	1.08	0.81	3.416666667	366.6666667
1205	0	3	0		410	0.99	0.75	4.151515152	414.1414141
1206	0	0	1	12	201	0.57	0.37	25.89473684	352.6315789
1207	0	2	1		252	0.49	0.22	17.42857143	514.2857143
1208	0	4	1		335	0.42	0.24	27.42857143	797.6190476
1209	0	6	1		375	0.5	0.29	23.8	750
1210	0	6	1		395	0.62	0.36	20.11290323	637.0967742
1211	0	7	1		414	0.65	0.4	18	636.9230769
1212	0	0	1	6	196	1.21	0.45	7.876033058	161.9834711
1213	0	1	1		190	1.49	0.3	6.993288591	127.5167785
1214	0	9	1		591	1.06	0.71	6.452830189	557.5471698
1215	0	12	1		645	1.14	0.98	6.01754386	565.7894737
1216	0	0	0	5	331	0.89	0.44	4.258426966	371.9101124
1217	0	1	0		341	0.98	0.45	2.969387755	347.9591837
1218	0	3	0		415	1.01	0.55	6.782178218	410.8910891
1219	0	5	0		479	0.98	0.63	5.56122449	488.7755102
1220	0	0	0	2	237	0.85	0.49	5.823529412	278.8235294
1221	0	0	1	4	104	0.79	0.43	5.316455696	131.6455696
1222	0	1	1		114	0.93	0.36	4.053763441	122.5806452
1223	0	2	1		121	0.69	0.69	8.028985507	175.3623188
1224	0	4	1		171	0.57	0.97	12.38596491	300
1225	0	7	1		204	0.87	1.03	13.6091954	234.4827586
1226	0	9	1		236	0.84	1.18	16.61904762	280.952381
1227	0	0	0	0	162	1.19	0.26	2.672268908	136.1344538
1228	0	4	0		236	1.17	0.22	2.794871795	201.7094017
1229	0	6	0		309	1.19	0.24	3.142857143	259.6638655
1230	0	8	0		345	1.11	0.38	3.783783784	310.8108108
1231	0	11	0		409	1.6	0.49	2.15625	255.625
1232	0	0	0	1	226	1.27	0.38	2.488188976	177.9527559
1233	0	0	1		240	0.46	0.52	8.304347826	521.7391304
1234	0	1	1		220	0.48	0.4	5.5	458.3333333
1235	0	0	0		219	0.46	0.61	20.7173913	476.0869565
1236	0	13	0		523	1.16	1.61	15.87931034	450.862069
1237	0	15	0		491	0.77	1.04	10.64935065	637.6623377
1238	0	18	0		482	0.68	0.9	12.54411765	708.8235294
1239	0	0	0	0	234	0.79	0.25	4.620253165	296.2025316
1240	0	0	1	3	144	0.84	0.3	4.142857143	171.4285714
1241	0	2	1		183	0.67	0.16	6.074626866	273.1343284
1242	0	0	0		329	1.96	0.68	2.428571429	167.8571429
1243	0	7	0		488	1.29	1.23	7.782945736	378.2945736
1244	0	0	0	4	234	0.52	0.46	9.576923077	450
1245	0	0	0	2	228	1.2	0.36	2.283333333	190
1246	0	0	0	5	317	0.44	0.33	20.61363636	720.4545455
1247	0	2	0		360	0.52	0.22	18.82692308	692.3076923
1248	0	4	0		315	1.15	0.42	5.826086957	273.9130435
1249	0	7	0		391	1.37	0.5	6.532846715	285.4014599
1250	0	0	1	6	146	0.86	0.43	7.755813953	169.7674419
1251	0	1	1		143	0.59	0.24	14.15254237	242.3728814
1252	0	0	0	13	286	0.93	0.29	16.06451613	307.5268817
1253	0	1	0		288	0.73	0.37	13.32876712	394.5205479
1254	0	3	0		381	0.99	0.64	6.848484848	384.8484848
1255	0	5	0		574	0.97	0.84	7.463917526	591.7525773
1256	0	8	0		760	1.36	0.85	7.507352941	558.8235294
1257	0	12	0		607	1.57	0.89	4.942675159	386.6242038
1258	0	0	1		208	0.47	0.44	10.44680851	442.5531915
1259	0	1	1		200	1.34	0.71	3.164179104	149.2537313
1260	0	3	1		178	0.37	0.24	11.81081081	481.0810811
1261	0	0	1		247	0.46	0.23	15.45652174	536.9565217
1262	0	1	1		272	0.89	0.36	7.494382022	305.6179775
1263	0	3	1	11	196	0.51	0.27	8.980392157	384.3137255
1264	0	7	1		350	0.81	0.4	7.358024691	432.0987654
1265	0	10	1		514	0.9	0.41	7.288888889	571.1111111
1266	0	11	1		526	1.19	0.42	4.789915966	442.0168067
1267	0	14	1		514	1.57	0.52	4.159235669	327.388535
1268	0	16	1		600	1.58	0.53	7.405063291	379.7468354
1269	0	1	0		355	1.29	0.29	8.418604651	275.1937984
1270	0	4	0		526	1.54	0.76	3.558441558	341.5584416
1271	0	0	0	4	170	1.31	0.68	3.923664122	129.7709924
1272	0	1	0		127	1.07	0.82	5.08411215	118.6915888
1273	0	2	0		175	1.49	0.76	3.10738255	117.4496644
1274	0	4	0		235	1.49	0.75	2.798657718	157.7181208
1275	0	7	0		353	1.66	0.95	2.831325301	212.6506024
1276	0	0	0	4	150	0.97	0.28	3.319587629	154.6391753
1277	0	1	0		159	1.16	0.31	2.413793103	137.0689655
1278	0	3	0		204	0.68	0.09	4.426470588	300
1279	0	5	0		253	0.87	0.14	3.252873563	290.8045977
1280	0	9	0		360	1.29	0.3	2.596899225	279.0697674
1281	0	10	0		444
1282	0	0	1	8	247	0.86	0.3	7.976744186	287.2093023
1283	0	0	0	4	239	1.37	0.86	3.671532847	174.4525547
1284	0	4	0		428	0.78	1.06	11.85897436	548.7179487
1285	0	6	0		404	1.16	0.97	7.103448276	348.2758621
1286	0	8	0		439	2.36	1.09	2.487288136	186.0169492
1287	0	0	0	2	192	1.03	0.34	4.922330097	186.407767
1288	0	3	0		271	0.64	0.37	6.46875	423.4375
1289	0	5	0		343	0.89	0.54	6.04494382	385.3932584
1290	0	8	0		434	1.31	0.45	4.053435115	331.2977099
1291	0	0	0	6	153	0.26	0.43	24.92307692	588.4615385
1292	0	0	0	2	303	0.78	0.74	10.91025641	388.4615385
1293	0	3	0		212	0.7	0.42	5.457142857	302.8571429
1294	0	0	0	0	211	1.19	0.4	2.672268908	177.3109244
1295	0	1	0		193	1.02	0.41	4.745098039	189.2156863
1296	0	0	1		150	0.54	0.26	8.555555556	277.7777778
1297	0	0	1	10	171	0.66	0.73	18.36363636	259.0909091
1298	0	1	1		206	0.7	0.68	15.24285714	294.2857143
1299	0	3	1		333	0.62	0.7	11.37096774	537.0967742
1300	0	0	0	0	130	0.73	0.25	5.465753425	178.0821918
1301	0	1	0		128	1.07	0.26	5.420560748	119.6261682
1302	0	0	0	0	153	1.63	0.34	1.779141104	93.86503067
1303	0	3	0		191	0.8	0.09	3.8625	238.75
1304	0	4	0		227	1.27	0.12	2.881889764	178.7401575
1305	0	6	0		314	1.2	0.23	3.725	261.6666667
1306	0	8	0		409	1.24	0.21	3.064516129	329.8387097
1307	0	11	0		581	1.44	0.27	3.104166667	403.4722222
1308	0	0	1	7	202	0.86	0.49	8.430232558	234.8837209
1309	0	2	1		154	1.44	0.7	10.13194444	106.9444444
1310	0	0	0		79	0.5	0.43	12.02	158
1311	0	3	0		109	0.52	0.44	10.63461538	209.6153846
1312	0	6	0		244	0.67	0.6	7	364.1791045
1313	0	8	0		349	1.03	0.79	4	338.8349515
1314	0	13	0		398	1.44	1	2.694444444	276.3888889
1315	0	0	1	3	265	1.22	0.31	7.106557377	217.2131148
1316	0	2	1		228	0.87	0.27	7.689655172	262.0689655
1317	0	8	1		261	1.58	0.97	10.85443038	165.1898734
1318	0	0	0	0	215	0.79	0.49	3.265822785	272.1518987
1319	0	0	0	1	319	1.47	0.73	7.428571429	217.0068027
1320	0	0	0	2	184	1.1	0.38	2.754545455	167.2727273
1321	0	1	0		168	0.88	0.23	2.795454545	190.9090909
1322	0	4	0		311	1.17	0.48	4.264957265	265.8119658
1323	0	6	0		375	0.99	0.66	5.444444444	378.7878788
1324	0	0	1		113	0.5	0.17	6.6	226
1325	0	2	1		95	0.46	0.16	5.565217391	206.5217391
1326	0	4	1		96	0.43	0.15	4.604651163	223.255814
1327	0	5	1		99	0.37	0.11	6.081081081	267.5675676
1328	0	7	1		150	0.43	0.1	8.325581395	348.8372093
1329	0	0	1	6	226	0.91	0.64	8.571428571	248.3516484
1330	0	0	0	4	277	0.66	0.61	10.72727273	419.6969697
1331	0	2	0		339	0.65	0.85	10.09230769	521.5384615
1332	0	0	0	4	194	0.55	0.39	12.49090909	352.7272727
1333	0	2	0		208	0.85	0.56	6.882352941	244.7058824
1334	0	4	0		260	1.03	0.56	5.475728155	252.4271845
1335	0	7	0		455	2.04	0.87	2.779411765	223.0392157
1336	0	0	0	1	212	1.43	0.32	2.902097902	148.2517483
1337	0	0	0	0	238	0.91	0.21	3.89010989	261.5384615
1338	0	1	0		226	0.51	0.25	7.215686275	443.1372549
1339	0	3	0		254	0.72	0.35	5.027777778	352.7777778
1340	0	5	0		328	0.79	0.42	6.278481013	415.1898734
1341	0	0	0	1	273	0.38	0.44	15.86842105	718.4210526
1342	0	2	0		335	0.43	0.35	12.79069767	779.0697674
1343	0	4	0		412	1.16	0.83	5.568965517	355.1724138
1344	0	5	0		468	1.31	0.57	3.79389313	357.2519084
1345	0	0	1	0	102	1.15	0.59	2.156521739	88.69565217
1346	0	1	1	1	95	0.87	0.4	2.942528736	109.1954023
1347	0	0	0	0	175	0.71	0.22	4.478873239	246.4788732
1348	0	4	0		276	0.74	0.25	4.094594595	372.972973
1349	0	0	0	1	122	0.92	0.26	2.380434783	132.6086957
1350	0	0	0		230	0.9	0.37	1.677777778	255.5555556
1351	0	1	0		204	0.94	0.28	1.255319149	217.0212766
1352	0	3	0		233	1.16	0.37	2.025862069	200.862069
1353	0	4	0	1	260	0.78	0.41	4.756410256	333.3333333
1354	0	6	0		384	0.99	0.39	2.303030303	387.8787879
1355	0	0	0		195	1.04	0.49	7.394230769	187.5
1356	0	2	0		263	0.64	0.29	13.453125	410.9375
1357	0	0	0	6	316	1.34	0.85	5.880597015	235.8208955
1358	0	0	1		330	1.09	0.39	6.798165138	302.7522936
1359	0	7	1	6	401	1.43	0.95	5.174825175	280.4195804
1360	0	7	1	5	444	1.51	1.12	5.841059603	294.0397351
1361	0	8	1	5	464	1.73	0.95	4.271676301	268.2080925
1362	0	9	1	4	475	1.86	1.09	3.591397849	255.3763441
1363	0	10	1	3	522	2.09	1.34	4.014354067	249.7607656
1364	0	11	1	2	495	2.62	1.56	2.877862595	188.9312977
1365	0	12	1	2	520	2.52	1.55	3.107142857	206.3492063
1366	0	13	1	4	554	2.54	1.11	2.484251969	218.1102362
1367	0	14	1	1	580	2.28	0.95	1.921052632	254.3859649
1368	0	15	1	0	566	2.03	0.76	2.044334975	278.817734
1369	0	16	1	1	564	2.33	0.73	2.326180258	242.0600858
1370	0	0	1		410	0.81	1.32	7.308641975	506.1728395
1371	0	2	0		594	1.14	1.39	6.780701754	521.0526316
1372	0	0	0		150	0.71	0.62	4.492957746	211.2676056
1373	0	5	0		116	0.3	0.54	10.33333333	386.6666667
1374	0	9	0		89	0.38	0.3	7.526315789	234.2105263
1375	0	13	0		130	0.29	0.29	24.82758621	448.2758621
1376	0	15	0	13	140	0.34	0.21	24.26470588	411.7647059
1377	0	16	0	9	157	0.35	0.3	19.62857143	448.5714286
1378	0	19	0	9	259	0.29	0.6	24.82758621	893.1034483
1379	0	0	0		313	1.37	0.35	2.131386861	228.4671533
1380	0	0	0		149	0.4	0.26	6.675	372.5
1381	0	2	0		176
1382	0	6	0		294	0.68	0.63	6.044117647	432.3529412
1383	0	9	0		270	0.87	0.97	6.816091954	310.3448276
1384	0	0	0		179	1.2	0.8	1.316666667	149.1666667
1385	0	5	0		147	0.89	0.37	1.898876404	165.1685393
1386	0	7	0		186	0.77	0.59	3.38961039	241.5584416
1387	0	8	0		202	0.59	0.69	6.762711864	342.3728814
1388	0	0	0		125	0.81	0.1	3.567901235	154.3209877
1389	0	2	0		144	1.14	0.14	3.754385965	126.3157895
1390	0	0	1		120	0.54	0.2	16.48148148	222.2222222
1391	0	4	1	6	270	0.62	0.48	7.822580645	435.483871
1392	0	5	1	5	246	0.77	0.54	7.324675325	319.4805195
1393	0	6	1	11	325	1.23	0.92	11.35772358	264.2276423
1394	0	7	1	11	297	1.14	0.74	9.622807018	260.5263158
1395	0	8	1	4	322	1.59	0.67	5.591194969	202.5157233
1396	0	9	1	4	337	1.87	0.8	4.101604278	180.2139037
1397	0	10	1	2	390	1.97	0.96	5.131979695	197.9695431
1398	0	11	1	2	433	2	1.09	5.385	216.5
1399	0	0	1		247	0.77	0.17	7.207792208	320.7792208
1400	0	3	1	8	345	0.93	0.52	4.88172043	370.9677419
1401	0	4	1	6	423	1.08	0.87	6.981481481	391.6666667
1402	0	5	1	8	418	1.26	1.68	7.619047619	331.7460317
1403	0	6	1	7	383	1.61	1.43	5.714285714	237.8881988
1404	0	7	1	7	488	1.64	1.57	7.591463415	297.5609756
1405	0	8	1	7	598	1.6	1.53	9.11875	373.75
1406	0	9	1	7	622	1.52	1.13	8.789473684	409.2105263
1407	0	10	1	5	679	1.26	1.34	13.30952381	538.8888889
1408	0	11	1	5	697	1.44	1.62	8.625	484.0277778
1409	0	12	1	3	765	1.76	1.84	7.005681818	434.6590909
1410	0	0	1	3	183	1.2	0.13	5.366666667	152.5
1411	0	4	1	11	274	0.69	0.42	14.13043478	397.1014493
1412	0	5	1	10	281	0.69	0.54	13.46376812	407.2463768
1413	0	6	1	16	316	0.28	0.43	36.67857143	1128.571429
1414	0	7	1	16	380	0.44	0.59	34	863.6363636
1415	0	8	1	15	361	0.49	0.79	30.85714286	736.7346939
1416	0	9	1	13	447	0.52	1.04	22.76923077	859.6153846
1417	0	10	1	7	477	1.02	1.05	7.921568627	467.6470588
1418	0	11	1	8	371	0.66	0.69	11.48484848	562.1212121
1419	0	12	1	7	352	0.71	0.78	11.85915493	495.7746479
1420	0	13	1	5	457	1.09	1.12	7.174311927	419.266055
1421	0	0	1		95	0.77	0.23	3.74025974	123.3766234
1422	0	2	1	5	109	0.9	0.16	3.611111111	121.1111111
1423	0	0	1		228	1.68	0.42	4.226190476	135.7142857
1424	0	0	1	8	231	0.8	0.25	7.375	288.75
1425	0	1	1	4	224	1.41	0.41	4.602836879	158.8652482
1426	0	2	1	6	253	1.84	0.41	2.179347826	137.5
1427	0	3	1	6	311	1.72	0.63	2.63372093	180.8139535
1428	0	4	1	4	381	2.45	0.72	1.428571429	155.5102041
1429	0	4	1	2	426	2.23	0.89	3.02690583	191.0313901
1430	0	5	1	1	420	1.82	0.95	3.241758242	230.7692308
1431	0	6	1	0	469	2.03	1.02	3.773399015	231.0344828
1432	0	7	1	1	497	2.54	0.91	2.279527559	195.6692913
1433	0	8	1		571
1434	0	0	1		159	1.01	0.43	2.396039604	157.4257426
1435	0	0	1	2	149	0.98	0.23	2.265306122	152.0408163
1436	0	2	1	1	195	1.01	0.2	3.415841584	193.0693069
1437	0	2	1	4	234	0.82	0.39	7.365853659	285.3658537
1438	0	3	1	5	256	1.78	0.37	5.5	143.8202247
1439	0	4	1	8	240	1.51	0.5	7.205298013	158.9403974
1440	0	5	1	13	239	0.88	0.34	13.13636364	271.5909091
1441	0	6	1	18	294	1	0.49	10.28	294
1442	0	7	1	16	279	0.81	0.37	7.87654321	344.4444444
1443	0	8	1	11	239	0.84	0.44	4.797619048	284.5238095
1444	0	9	1		252
1445	0	0	1		401	0.37	0.79	76.62162162	1083.783784
1446	0	1	1	13	364	0.57	0.92	46.96491228	638.5964912
1447	0	2	1	16	287	0.42	0.7	40.47619048	683.3333333
1448	0	3	1	18	256	0.44	0.57	38.81818182	581.8181818
1449	0	4	1	22	313	0.54	0.67	34.37037037	579.6296296
1450	0	5	1	18	286	0.83	1.27	28.09638554	344.5783133
1451	0	6	1	15	267	1.06	1.8	23.09433962	251.8867925
1452	0	7	1	12	210	0.8	1.38	25.35	262.5
1453	0	8	1	8	210	0.9	1.49	28.1	233.3333333
1454	0	9	1	9	225	0.7	1.43	31.87142857	321.4285714
1455	0	10	1	10	214	1.03	1.74	21.33980583	207.7669903
1456	0	0	0		96	0.62	0.44	13.22580645	154.8387097
1457	0	1	0	7	90	0.96	0.41	7.916666667	93.75
1458	0	2	0	6	106	0.93	0.32	6.107526882	113.9784946
1459	0	7	0	0	269	2.03	0.81	2.064039409	132.5123153
1460	0	0	0		181	0.6	0.35	8.65	301.6666667
1461	0	3	0	1	184	0.88	0.41	4.568181818	209.0909091
1462	0	0	0		193	0.84	0.49	4.523809524	229.7619048
1463	0	1	0	0	177	1.24	0.59	3.298387097	142.7419355
1464	0	2	0	0	189	1.22	0.44	3.795081967	154.9180328
1465	0	0	0		106	0.55	0.15	3.145454545	192.7272727
1466	0	5	0		174	0.39	0.18	14.38461538	446.1538462
1467	0	7	0	2	200	0.55	0.34	7.127272727	363.6363636
1468	0	0	0		154	0.97	0.19	3.536082474	158.7628866
1469	0	2	0	5	170	0.88	0.32	4.568181818	193.1818182
1470	0	4	0	8	274	1.87	0.51	1.85026738	146.5240642
1471	0	7	0	0	452	1.45	0.8	2.696551724	311.7241379
1472	0	0	1		179	0.57	0.17	6.98245614	314.0350877
1473	0	2	1	10	270	0.8	0.22	7.975	337.5
1474	0	4	1	15	354	1.07	0.62	27.07476636	330.8411215
1475	0	5	1	19	357	1.22	0.88	18.64754098	292.6229508
1476	0	5	1	14	199	0.97	0.79	13.06185567	205.1546392
1477	0	5	1	16	178	0.99	0.68	11.34343434	179.7979798
1478	0	6	1	16	161	0.78	0.56	11.34615385	206.4102564
1479	0	7	1	13	128	0.62	0.65	14.12903226	206.4516129
1480	0	10	1	14	143	0.57	0.56	12.03508772	250.877193
1481	0	11	1	12	176	0.55	0.56	12.16363636	320
1482	0	0	1		263	0.37	0.16	21.7027027	710.8108108
1483	0	4	1	12	193	0.65	0.32	8.230769231	296.9230769
1484	0	5	1	12	194	0.69	0.41	10.17391304	281.1594203
1485	0	6	1	11	266	0.79	0.55	10.29113924	336.7088608
1486	0	7	1	10	287	0.61	0.42	12.83606557	470.4918033
1487	0	8	1	9	383	0.77	0.46	13.37662338	497.4025974
1488	0	9	1	9	424	0.7	0.51	15.67142857	605.7142857
1489	0	10	1	8	518	0.94	0.68	11.62765957	551.0638298
1490	0	11	1	8	520	1.11	0.83	13.25225225	468.4684685
1491	0	12	1	5	568	1.39	0.58	9.402877698	408.6330935
1492	0	13	1	6	593	1.33	0.72	10.65413534	445.8646617
1493	0	0	0		79
1494	0	1	0	9	79	1.04	0.41	2.567307692	75.96153846
1495	0	0	0	1	144	1.37	0.63	1.912408759	105.1094891
1496	0	1	0	0	139	1.12	0.41	2.232142857	124.1071429
1497	0	1	0	0	88	1.15	0.5	2.226086957	76.52173913
1498	0	0	0	2	194	1.57	0.63	3.286624204	123.566879
1499	0	1	0	1	207	1.24	0.57	4.870967742	166.9354839
1500	0	3	0	0	231	1.23	0.65	2.707317073	187.804878
1501	0	0	0	5	143	0.84	0.28	7.488095238	170.2380952
1502	0	1	0	5	131	1.18	0.21	4.203389831	111.0169492
1503	0	2	0	3	143	1	0.14	4.74	143
1504	0	3	0	2	159	1.01	0.18	5.475247525	157.4257426
1505	0	0	1	6	252	0.56	0.44	8.535714286	450
1506	0	1	1	4	240	1.29	0.48	4.302325581	186.0465116
1507	0	4	1	14	211	0.47	0.25	24.08510638	448.9361702
1508	0	2	0		162	0.34	0.19	4.558823529	476.4705882
1509	0	4	0		201	0.21	0.14	10.66666667	957.1428571
1510	0	6	0	2	214	0.16	0.11	16.1875	1337.5
1511	0	11	0	4	333	0.17	0.1	21.11764706	1958.823529
1512	0	13	0	6	292	0.18	0.1	17.05555556	1622.222222
1513	0	15	0	5	337	0.16	0.15	20.3125	2106.25
1514	0	17	0	4	374	0.24	0.23	17	1558.333333
1515	0	4	0		346	0.66	0.52	8.515151515	524.2424242
1516	0	13	0	0	411	2.17	0.55	2.322580645	189.4009217
1517	0	5	1	8	295	1.06	0.75	6.877358491	278.3018868
1518	0	7	1	14	297	0.77	1.14	14.12987013	385.7142857
1519	0	10	1	11	390	1.65	2.03	9.363636364	236.3636364
1520	0	4	0	6	366	1.01	0.38	2.841584158	362.3762376
1521	0	5	0	0	160	0.85	0.51	4.811764706	188.2352941
1522	0	9	0	0	203	1.05	0.65	3.276190476	193.3333333
1523	0	11	0	2	245	1.03	0.62	4.233009709	237.8640777
1524	0	13	0	3	259	1.27	0.74	3.708661417	203.9370079
1525	0	16	0	0	293	1.43	0.75	3.384615385	204.8951049
1526	0	0	1		157	1.16	0.61	3.413793103	135.3448276
1527	0	5	1	7	222	0.79	0.29	9.746835443	281.0126582
1528	0	2	1	1	173	0.76	0.56	7.197368421	227.6315789
1529	0	4	1	4	193	0.68	0.49	14.32352941	283.8235294
1530	0	7	1	7	192	0.52	0.23	11	369.2307692
1531	0	9	1	6	200	0.41	0.52	14.41463415	487.804878
1532	0	11	1	7	206	0.3	0.45	16.36666667	686.6666667
1533	0	14	1	7	266	0.48	0.62	16.22916667	554.1666667
1534	0	1	1		264	1.42	0.68	7.091549296	185.915493
1535	0	3	1		193	0.66	0.78	11.22727273	292.4242424
1536	0	4	1		155	0.77	0.67	6.12987013	201.2987013
1537	0	6	1	1	153	0.48	0.47	8.020833333	318.75
1538	0	8	1	6	149	0.51	0.7	15.47058824	292.1568627
1539	0	1	1		156	0.92	0.19	2.739130435	169.5652174
1540	0	2	1		165	0.52	0.13	7.134615385	317.3076923
1541	0	3	1	7	182	0.54	0.17	10.74074074	337.037037
1542	0	5	1	5	262	0.9	0.39	5.244444444	291.1111111
1543	0	8	1	12	332	0.58	0.54	9.120689655	572.4137931
1544	0	10	1	11	407	0.63	0.77	12.19047619	646.031746
1545	0	10	1	9	375	1.05	0.68	5.742857143	357.1428571
1546	0	12	1	8	387	0.73	0.68	7.246575342	530.1369863
1547	0	15	1	7	466	0.58	0.92	13.5862069	803.4482759
1548	0	1	0		145	0.74	0.39	4.081081081	195.9459459
1549	0	6	0	2	236	0.99	0.48	5.151515152	238.3838384
1550	0	9	0	0	299	1.4	0.48	2.842857143	213.5714286
1551	0	13	0	0	323	2.28	0.49	2.346491228	141.6666667
1552	0	1	0	2	130	0.84	0.52	4	154.7619048
1553	0	3	0	3	176	0.86	0.22	7.302325581	204.6511628
1554	0	5	0	1	230	1.22	0.3	5.737704918	188.5245902
1555	0	0	0		185	1.93	0.62	2.10880829	95.85492228
1556	0	2	0	0	201	1.55	0.47	2.722580645	129.6774194
1557	0	0	1		97	0.54	0.27	6.62962963	179.6296296
1558	0	2	1	1	96	0.29	0.33	12.5862069	331.0344828
1559	0	4	1	1	134	0.33	0.38	15.09090909	406.0606061
1560	0	5	1	4	140	0.33	0.35	18	424.2424242
1561	0	7	1	4	150	0.44	0.47	16.54545455	340.9090909
1562	0	9	1	4	131	0.26	0.53	22.19230769	503.8461538
1563	0	12	1	1	109	0.28	0.46	12.53571429	389.2857143
1564	0	1	0	6	271	0.68	0.59	8.705882353	398.5294118
1565	0	3	0	1	379	1.06	0.65	3.735849057	357.5471698
1566	0	1	0	1	214	0.75	0.45	4.306666667	285.3333333
1567	0	3	0	0	279	0.76	0.39	4.184210526	367.1052632
1568	0	1	0		212	1.12	0.9	3.026785714	189.2857143
1569	0	2	0		215	0.92	0.96	2.5	233.6956522
1570	0	5	0		224	1.04	1.11	3.490384615	215.3846154
1571	0	7	0	0	197	0.83	0.8	3.265060241	237.3493976
1572	0	0	0		158	1.07	0.61	4.822429907	147.6635514
1573	0	1	0		164	1.06	0.5	5.075471698	154.7169811
1574	0	2	0	5	201	0.84	0.51	8.119047619	239.2857143
1575	0	4	0	3	275	1.31	0.81	4.809160305	209.9236641
1576	0	0	0		117	0.51	0.25	3.274509804	229.4117647
1577	0	5	0	2	183	0.38	0.33	15.10526316	481.5789474
1578	0	7	0	1	220	0.35	0.37	12.25714286	628.5714286
1579	0	9	0	2	308	0.46	0.57	13.60869565	669.5652174
1580	0	11	0	3	368	0.5	0.55	11.58	736
1581	0	0	0		229	1.22	0.93	4.229508197	187.704918
1582	0	3	0	1	190	1.04	0.6	4.375	182.6923077
1583	0	1	1	2	93	0.75	0.5	3.453333333	124
1584	0	2	1	2	97	0.77	0.4	3.155844156	125.974026
1585	0	5	1	6	155	0.69	0.3	5.449275362	224.6376812
1586	0	5	1	1	168	0.8	0.31	4.85	210
1587	0	7	1	8	189	0.56	0.13	11.42857143	337.5
1588	0	9	1	5	134	0.69	0.15	5.014492754	194.2028986
1589	0	12	1	8	31	0.43	0.21	5.627906977	72.09302326
1590	0	0	0		150	1.17	0.61	2.547008547	128.2051282
1591	0	2	0	0	193	1.03	0.43	4.281553398	187.3786408
1592	0	0	0		157	0.36	0.69	5.666666667	436.1111111
1593	0	8	0		225	0.29	1.34	5.24137931	775.862069
1594	0	9	0	6	208	0.37	0.95	7.216216216	562.1621622
1595	0	0	1		211	1.08	0.49	4.722222222	195.3703704
1596	0	2	1	6	248	0.78	0.45	8.987179487	317.9487179
1597	0	0	0		224	0.82	0.52	6.170731707	273.1707317
1598	0	2	0	0	266	0.79	0.34	3.886075949	336.7088608
1599	0	0	0		384	0.67	0.26	11.3880597	573.1343284
1600	0	1	0	5	375	0.58	0.37	11.48275862	646.5517241
1601	0	2	0	6	448	0.75	0.21	7.506666667	597.3333333
1602	0	4	0	4	537	0.74	0.49	8.175675676	725.6756757
1603	0	6	0	0	669	1.03	0.58	5.291262136	649.5145631
1604	0	8	0	0	725	1.35	0.49	2.940740741	537.037037
1605	0	9	0	0	683	1.3	0.47	3.2	525.3846154
1606	0	11	0	0	656	1.48	0.56	2.716216216	443.2432432
1607	0	0	0		212	0.41	0.3	10.51219512	517.0731707
1608	0	1	0	3	214	0.34	0.22	9.235294118	629.4117647
1609	0	3	0	1	217	0.67	0.55	5.835820896	323.880597
1610	0	0	0		145	0.52	0.11	5.634615385	278.8461538
1611	0	2	0	7	174	0.48	0.09	7.333333333	362.5
1612	0	4	0	1	246	0.84	0.23	1.857142857	292.8571429
1613	0	1	0	2	254	0.71	0.67	7.028169014	357.7464789
1614	0	3	0	3	275	0.56	0.61	5.607142857	491.0714286
1615	0	4	0	2	331	0.53	0.57	7.962264151	624.5283019
1616	0	6	0	8	247	0.77	0.76	5.337662338	320.7792208
1617	0	8	0	8	200	0.81	0.91	7.024691358	246.9135802
1618	0	10	0	4	189	1.13	0.91	6.14159292	167.2566372
1619	0	2	1	3	106	0.78	0.12	2.884615385	135.8974359
1620	0	4	1	6	172	1.1	0.18	2.118181818	156.3636364
1621	0	6	1	12	247	0.84	0.32	4.833333333	294.047619
1622	0	7	1	8	285	0.4	0.34	12.25	712.5
1623	0	8	1	11	288	0.63	0.38	6.936507937	457.1428571
1624	0	9	1	10	291	1	0.35	4.21	291
1625	0	10	1	8	343	0.9	0.68	6.511111111	381.1111111
1626	0	11	1	8	348	1.13	0.63	4.292035398	307.9646018
1627	0	0	1		236	0.62	0.18	9.322580645	380.6451613
1628	0	3	1	2	299	0.82	0.35	3.658536585	364.6341463
1629	0	5	1	2	295	0.97	0.39	4.020618557	304.1237113
1630	0	7	1	2	326	0.86	0.6	4.372093023	379.0697674
1631	0	1	1		180
1632	0	4	1		141	0.86	0.12	2.744186047	163.9534884
1633	0	7	1	4	212	0.48	0.14	7.666666667	441.6666667
1634	0	9	1	6	430	0.8	0.4	7.7375	537.5
1635	0	1	0	1	209	0.49	0.41	6.285714286	426.5306122
1636	0	2	0	1	187	0.35	0.45	9.285714286	534.2857143
1637	0	0	0	1	201	0.6	0.21	4.066666667	335
1638	0	1	0	0	180	0.57	0.19	3.684210526	315.7894737
1639	0	2	0	1	181	0.7	0.19	3.828571429	258.5714286
1640	0	4	0		225	0.73	0.22	5.534246575	308.2191781
1641	0	6	0	1	275	0.85	0.21	5.564705882	323.5294118
1642	0	8	0	1	330	1.26	0.36	3.738095238	261.9047619
1643	0	0	1	5	165	0.42	0.52	17.83333333	392.8571429
1644	0	2	1	7	195	0.42	0.29	16.73809524	464.2857143
1645	0	4	1	8	251	0.27	0.21	37.51851852	929.6296296
1646	0	0	1		246	0.81	0.62	12.39506173	303.7037037
1647	0	1	1	9	207	1.17	0.85	9.777777778	176.9230769
1648	0	3	1	8	120	0.78	0.21	14.28205128	153.8461538
1649	0	5	1	13	78	0.46	0.54	29.5	169.5652174
1650	0	5	1	12	97	0.63	0.54	22.88888889	153.968254
1651	0	0	1		185	1.18	0.26	2.711864407	156.779661
1652	0	2	1	2	197	1	0.24	3.46	197
1653	0	4	1	8	303	0.88	0.49	7.545454545	344.3181818
1654	0	5	1	10	385	0.65	0.64	15.61538462	592.3076923
1655	0	7	1	14	298	0.93	1.67	17.09677419	320.4301075
1656	0	10	1	11	203	1.68	1.24	7.422619048	120.8333333
1657	0	0	0		168	0.98	0.61	3.969387755	171.4285714
1658	0	2	0	3	119	0.55	0.26	5.418181818	216.3636364
1659	0	0	0	0	189	0.91	0.84	5.736263736	207.6923077
1660	0	2	0	3	191	0.58	0.59	8.103448276	329.3103448
1661	0	4	0	3	286	0.59	0.63	7.644067797	484.7457627
1662	0	0	1		179	0.28	0.3	12.17857143	639.2857143
1663	0	1	1	7	186	0.1	0.09	48.5	1860
1664	0	6	1	9	277	0.12	0.08	40.66666667	2308.333333
1665	0	9	1	7	210	0.22	0.31	36.77272727	954.5454545
1666	0	0	0		271	1.34	1.36	11.70149254	202.238806
1667	0	8	0	2	784	1.51	1	5.278145695	519.205298
1668	0	10	0	5	683	1.08	0.54	4.453703704	632.4074074
1669	0	12	0	2	643	1.24	0.49	5.112903226	518.5483871
1670	0	14	0	5	550	0.8	0.34	6.175	687.5
1671	0	16	0	5	514	1.18	0.24	4.169491525	435.5932203
1672	0	18	0	7	519	0.77	0.24	8.116883117	674.025974
1673	0	1	0	4	161	0.64	0.08	12.78125	251.5625
1674	0	2	0	7	188	0.62	0.19	15.72580645	303.2258065
1675	0	4	0	7	270	0.6	0.29	7.266666667	450
1676	0	1	1	7	149	1.65	0.34	3.103030303	90.3030303
1677	0	3	1	4	153	1.28	0.28	3.015625	119.53125
1678	0	4	1	3	177	1.37	0.24	2.861313869	129.1970803
1679	0	6	1	7	198	1.37	0.52	4.97080292	144.5255474
1680	0	0	1		165	0.82	0.91	7.182926829	201.2195122
1681	0	1	1	0	147	1.39	0.61	2.438848921	105.7553957
1682	0	3	1	2	162	0.64	0.78	8.390625	253.125
1683	0	5	1	6	226	0.85	0.78	9.788235294	265.8823529
1684	0	2	0	8	325	0.45	0.36	8.355555556	722.2222222
1685	0	4	0	6	355	0.53	0.51	8.811320755	669.8113208
1686	0	6	0	4	421	0.66	0.56	7.03030303	637.8787879
1687	0	8	0	2	434	1.03	0.59	4.922330097	421.3592233
1688	0	2	0	2	286	0.61	0.23	6.360655738	468.852459
1689	0	4	0	1	410	0.63	0.34	7.285714286	650.7936508
1690	0	3	1	8	324	0.26	0.83	35.65384615	1246.153846
1691	0	3	1	8	328	0.29	0.99	33.72413793	1131.034483
1692	0	5	1	7	271	0.28	0.72	20.92857143	967.8571429
1693	0	8	1	10	253	0.28	0.58	35.35714286	903.5714286
1694	0	2	1	6	203	0.59	0.27	11.42372881	344.0677966
1695	0	0	0		340	0.85	0.58	12.29411765	400
1696	0	5	0	5	508	0.69	0.8	9.144927536	736.2318841
1697	0	0	0	1	181	0.54	0.56	5.814814815	335.1851852
1698	0	2	0	1	127	0.31	0.2	1.935483871	409.6774194
1699	0	4	0	3	133	0.8	0.15	0.9	166.25
1700	0	6	0	1	172	0.61	0.16	2.114754098	281.9672131
1701	0	0	1	4	306	0.42	1.78	18.19047619	728.5714286
1702	0	1	1	1	243	0.49	0.57	9.530612245	495.9183673
1703	0	3	1	2	271	0.85	1.15	10.92941176	318.8235294
1704	0	0	1	9	91	0.49	0.12	4.693877551	185.7142857
1705	0	2	1	22	75	0.58	0.45	13.48275862	129.3103448
1706	0	3	1	18	68	0.76	0.59	11.07894737	89.47368421
1707	0	4	1	17	85	0.65	0.64	16.56923077	130.7692308
1708	0	7	1	16	121	0.95	0.53	21.51578947	127.3684211
1710	0	0	0	7	24	0.2	0.1	7.95	120
1711	0	1	0		32
1712	0	3	0	2	48	0.47	0.11	3.957446809	102.1276596
1713	0	5	0	2	52	0.22	0.13	12.77272727	236.3636364
1714	0	0	0	1	189	0.58	0.33	6.948275862	325.862069
1715	0	1	0	2	218	0.66	0.33	7.46969697	330.3030303
1716	0	3	0	5	305	0.57	0.36	10.31578947	535.0877193
1717	0	0	0	2	122	0.61	0.34	5.393442623	200
1718	0	1	0	5	130	0.58	0.5	7.75862069	224.137931
1719	0	5	0	2	283	0.79	1.23	5.64556962	358.2278481
1720	0	0	0	5	332	1	0.84	10.27	332
1721	0	1	0	5	378	0.72	0.74	13.875	525
1722	0	3	0	3	469	0.81	0.59	6.543209877	579.0123457
1723	0	0	0	0	174	1.89	0.26	0.756613757	92.06349206
1724	0	2	0	1	241	1.39	0.24	2.676258993	173.381295
1725	0	4	0	2	321	1.85	0.36	1.205405405	173.5135135
1726	0	6	0	2	443	1.87	0.6	1.679144385	236.8983957
1727	0	0	0	0	96	0.67	0.5	4.880597015	143.2835821
1728	0	2	0	0	157	0.73	0.49	3.904109589	215.0684932
1729	0	4	0	1	247	0.57	0.76	6.631578947	433.3333333
1730	0	6	0	4	306	0.59	1.04	9.169491525	518.6440678
1731	0	0	0		205	0.73	0.53	3.643835616	280.8219178
1732	0	3	0	0	247	0.88	0.88	5.931818182	280.6818182
1733	0	5	0	2	335	0.91	0.92	5.318681319	368.1318681
1734	0	7	0	0	440	1.12	0.84	5.446428571	392.8571429
1735	0	0	1	3	145	0.65	0.4	6.123076923	223.0769231
1736	0	2	1	3	182	0.79	0.38	8.050632911	230.3797468
1737	0	5	1	10	219	0.68	0.43	12.86764706	322.0588235
1738	0	8	1	10	301	0.35	0.49	21.37142857	860
1739	0	0	0		157	1.33	0.83	3.052631579	118.0451128
1740	0	5	0	0	235	1.36	0.59	3.897058824	172.7941176
1741	0	6	0	3	280	0.97	0.55	6.639175258	288.6597938
1742	0	0	0	4	79	0.52	0.17	10.28846154	151.9230769
1743	0	1	0	2	100	0.42	0.21	11.64285714	238.0952381
1744	0	3	0	1	172	0.41	0.2	9.609756098	419.5121951
1745	0	5	0	1	239	0.61	0.35	6.852459016	391.8032787
1746	0	0	0	0	285	4.82	0.3	1.348547718	59.12863071
1747	0	2	0	0	362	4.66	0.49	1.268240343	77.68240343
1748	0	4	0	1	485	6.33	0.92	1.090047393	76.6192733
1749	0	0	0	0	267	1.08	0.7	4.5	247.2222222
1750	0	2	0	0	319	1.08	0.61	4.768518519	295.3703704
1751	0	0	0	0	136	1.29	0.42	2.19379845	105.4263566
1752	0	1	0	0	156	1.03	0.29	4	151.4563107
1753	0	3	0	0	168	1.26	0.5	2.595238095	133.3333333
1754	0	0	1	1	155	1.01	0.72	3.693069307	153.4653465
1755	0	2	1	1	243	1.1	0.47	4.409090909	220.9090909
1756	0	6	1	7	397	0.72	0.61	13.09722222	551.3888889
1757	0	8	1	8	563	1.79	1.31	9.56424581	314.5251397
1758	0	0	1	6	370	0.97	0.51	8.381443299	381.443299
1759	0	1	1	8	470	0.92	0.57	10.48913043	510.8695652
1760	0	0	0	0	170	0.99	0.31	3.161616162	171.7171717
1761	0	5	0	0	149	1.51	0.31	1.523178808	98.67549669
1762	0	7	0	0	182	1.23	0.32	1.81300813	147.9674797
1763	0	0	0	3	315	0.51	0.43	16.23529412	617.6470588
1764	0	1	0	3	297	0.51	0.33	13.41176471	582.3529412
1765	0	3	0	5	298	0.48	0.5	12.08333333	620.8333333
1766	0	5	0	4	334	0.64	0.69	16.28125	521.875
1767	0	7	0	8	250	0.61	0.95	22.50819672	409.8360656
1768	0	0	0	0	338	1.59	1.06	5.610062893	212.5786164
1769	0	1	0	0	280	2.52	1.46	2.452380952	111.1111111
1770	0	0	0		147	0.63	0.41	3.015873016	233.3333333
1771	0	9	0	4	142	0.42	0.11	9.428571429	338.0952381
1772	0	13	0	3	199	0.4	0.13	6.15	497.5
1773	0	0	1	4	250	0.9	1.2	7.822222222	277.7777778
1774	0	2	1	6	268	0.45	0.75	23.55555556	595.5555556
1775	0	6	1	16	260	1.02	1.61	17.39215686	254.9019608
1776	0	0	1	0	88	1.2	0.66	5.491666667	73.33333333
1777	0	2	1	4	100	0.61	0.36	12.36065574	163.9344262
1778	0	0	0	0	119	0.91	0.59	2.67032967	130.7692308
1779	0	0	0	1	158	0.83	0.68	3.903614458	190.3614458
1780	0	1	0	3	158	0.54	0.79	7.407407407	292.5925926
1781	0	3	0	0	240	0.8	0.65	2.6125	300
1782	0	6	0	2	301	0.4	0.85	16.3	752.5
1783	0	2	1	4	97	0.95	0.28	6.052631579	102.1052632
1784	0	10	0	2	206	1.27	0.42	2.503937008	162.2047244
1785	0	13	0	1	150	1.03	0.25	3.757281553	145.631068
1786	0	16	0	3	192	0.88	0.36	5.909090909	218.1818182
1787	0	0	0	3	113	0.66	0.16	3.378787879	171.2121212
1788	0	2	0	1	185	0.6	0.22	4.983333333	308.3333333
1789	0	3	0	4	197	0.39	0.33	11.07692308	505.1282051
1790	0	5	0	4	274	0.5	0.64	12.3	548
1791	0	0	1	1	145	0.46	0.46	9.913043478	315.2173913
1792	0	2	1	3	172	0.66	0.34	11.48484848	260.6060606
1793	0	5	1	10	290	0.66	0.64	19	439.3939394
1794	0	0	0	2	185	0.52	0.57	7.153846154	355.7692308
1795	0	2	0	0	202	0.74	0.31	2.054054054	272.972973
1796	0	0	0	1	206	0.77	0.72	5.883116883	267.5324675
1797	0	2	0	0	204	1.04	0.66	3.394230769	196.1538462
1798	0	0	0	1	223	1.66	0.39	2.421686747	134.3373494
1799	0	2	0	1	227	1.37	0.36	2.02189781	165.6934307
1800	0	3	0	0	276	1.6	0.47	1.4875	172.5
1801	0	0	0	3	133	0.44	0.11	10.18181818	302.2727273
1802	0	2	0	3	162	0.36	0.15	10.08333333	450
1803	0	0	0	0	196	1.18	0.39	2.966101695	166.1016949
1804	0	1	0	0	187	0.99	0.26	3.444444444	188.8888889
1805	0	3	0	5	302	0.82	0.54	9.402439024	368.2926829
1806	0	5	0	4	385	0.91	0.45	10.42857143	423.0769231
1807	0	0	1	0	176	1.42	0.47	7.112676056	123.943662
1808	0	4	1	8	156	1.28	0.81	4.6171875	121.875
1809	0	0	0	3	262	0.88	0.63	9.170454545	297.7272727
1810	0	2	0	0	339	1.15	0.83	5.130434783	294.7826087
1811	0	0	0	1	266	0.75	0.36	4.16	354.6666667
1812	0	2	0	2	295	0.67	0.5	6.626865672	440.2985075
1813	0	0	0	1	189	0.47	0.07	1.957446809	402.1276596
1814	0	1	0	5	184	0.57	0.1	1.210526316	322.8070175
1815	0	3	0	1	268	0.59	0.16	2.237288136	454.2372881
1816	0	0	1	2	276	1.75	0.72	7.297142857	157.7142857
1817	0	2	1	7	340	1.27	0.65	9.330708661	267.7165354
1818	0	4	1	7	341	1.05	0.57	10.24761905	324.7619048
1819	0	0	0	0	205	0.94	0.33	3.372340426	218.0851064
1820	0	2	0	0	196	0.74	0.26	4.472972973	264.8648649
1821	0	0	0	0	151	0.66	0.46	2.878787879	228.7878788
1822	0	1	0	8	127	0.54	0.32	10.75925926	235.1851852
1823	0	2	0	1	178	0.73	0.49	7.424657534	243.8356164
1824	0	4	0	3	246	0.66	0.52	10.24242424	372.7272727
1825	0	5	0	4	402	0.68	0.46	12.85294118	591.1764706
1826	0	0	1	4	257	0.34	0.21	28.14705882	755.8823529
1827	0	2	1	8	354	0.32	0.26	21.40625	1106.25
1828	0	4	1		233
1829	0	6	1	7	166	0.66	0.34	16.59090909	251.5151515
1830	0	0	0	6	368	1.08	0.49	13.57407407	340.7407407
1831	0	5	1	0	394	1.46	0.52	3.321917808	269.8630137
1832	0	4	0	8	265	0.46	0.62	12.41304348	576.0869565
1833	0	0	0	0	313	1	0.37	4.85	313
1834	0	3	0	2	388	0.79	0.28	6.075949367	491.1392405
1835	0	0	0	3	252	1.15	0.22	7.47826087	219.1304348
1836	0	0	1	5	176	0.75	0.3	6.586666667	234.6666667
1837	0	1	1	4	168	0.72	0.3	6.472222222	233.3333333
1838	0	3	1	5	212	0.45	0.31	13.73333333	471.1111111
1839	0	0	0	0	142	1.13	0.43	2.168141593	125.6637168
1840	0	3	0	0	176	1.22	0.53	3.401639344	144.2622951
1841	0	0	1	9	215	0.92	0.61	11.09782609	233.6956522
1842	0	3	1	8	268	0.82	0.38	11.97560976	326.8292683
1843	0	0	0	3	206	0.52	0.45	15.36538462	396.1538462
1844	0	0	1	5	63	1.05	1.25	0.2	60
1845	0	1	1	4	62	1.11	2.47	0.225225225	55.85585586
1846	0	3	1	7	60	1.23	3.26	0.300813008	48.7804878
1847	0	0	1	0	161	1.6	0.59	3.5375	100.625
1848	0	2	1	0	180	1.26	0.43	5.293650794	142.8571429
1849	0	4	1	1	175	1.38	0.63	5.391304348	126.8115942
1850	0	0	1	3	265	1.12	0.61	5.875	236.6071429
1851	0	1	1	6	275	0.57	0.52	12.19298246	482.4561404
1852	0	3	1	8	336	1	0.72	8.85	336
1853	0	0	0	2	193	1.36	0.25	2.647058824	141.9117647
1854	0	2	0	1	204	1.75	0.24	1.891428571	116.5714286
1855	0	0	0		227	0.39	0.3	43.05128205	582.0512821
1856	0	2	0	5	306	0.65	0.33	16.4	470.7692308
1857	0	0	0	1	168	0.83	0.46	3.951807229	202.4096386
1858	0	2	0	0	225	1.28	0.48	2.3515625	175.78125
1859	0	0	0	4	312	1.04	1.02	13.00961538	300
1860	0	1	0	5	327	0.72	0.3	12.875	454.1666667
1861	0	3	0	2	467	1.29	0.81	4.209302326	362.0155039
1862	0	0	0	0	215	0.99	0.33	2.636363636	217.1717172
1863	0	5	0	0	340	1.58	0.47	2.120253165	215.1898734
1864	0	6	0	0	346	1.74	0.36	1.24137931	198.8505747
1865	0	7	0	0	381	2.02	0.43	1.311881188	188.6138614
1866	0	0	0	1	228	0.42	0.56	11.85714286	542.8571429
1867	0	3	0	2	198	0.3	0.16	9.266666667	660
1868	0	0	1	1	268	0.77	0.58	6.701298701	348.0519481
1869	0	1	1	4	275	0.67	0.62	10.58208955	410.4477612
1870	0	3	1	5	356	0.68	0.88	14.67647059	523.5294118
1871	0	0	1	0	245	1.41	0.95	4.531914894	173.7588652
1872	0	1	1	0	187	1.18	1.01	5.06779661	158.4745763
1873	0	2	1	3	191	0.83	0.83	11.86746988	230.1204819
1874	0	4	1	6	186	0.73	0.87	20.68493151	254.7945205
1875	0	0	1	7	634	1.15	0.71	9.365217391	551.3043478
1876	0	3	1	4	541	1.12	0.88	13.05357143	483.0357143
1877	0	0	0	3	111	0.65	0.45	8.692307692	170.7692308
1878	0	1	0	1	111	0.71	0.42	6.76056338	156.3380282
1879	0	1	0	2	149	0.47	0.47	7.893617021	317.0212766
1880	0	3	0	7	135	0.5	0.1	4.34	270
1881	0	0	1	0	217	0.74	0.5	5.540540541	293.2432432
1882	0	2	1	2	200	0.78	0.28	4.320512821	256.4102564
1883	0	1	0	0	217	1.53	0.73	1.431372549	141.8300654
1884	0	2	0	0	238	1.01	0.67	2.584158416	235.6435644
1885	0	0	0	0	217	1.42	0.36	2.429577465	152.8169014
1886	0	2	0	0	243	0.79	0.34	4.455696203	307.5949367
1887	0	0	1	0	236	1.23	0.29	3.06504065	191.8699187
1888	0	3	1	7	322	0.8	0.32	11.1875	402.5
1889	0	0	0	4	268	2.14	0.31	3.355140187	125.2336449
1890	0	1	0	3	256	1.76	0.24	3.857954545	145.4545455
1891	0	3	0	4	314	2.51	0.34	2.075697211	125.0996016
1892	0	3	1	20	163	0.36	0.27	39.44444444	452.7777778
1893	0	4	1	20	165	0.6	0.32	32.95	275
1894	0	5	1	24	199	1.04	0.5	27.48076923	191.3461538
1895	0	6	1	24	231	2.01	0.53	18.19402985	114.9253731
1896	0	7	1	23	195	1.26	0.46	27.45238095	154.7619048
1897	0	3	1	5	418	0.92	1.6	7.608695652	454.3478261
1898	0	3	1	7	494	1.1	1.84	10.04545455	449.0909091
1899	0	3	1	2	420	1.35	1.12	5.22962963	311.1111111
1900	0	3	1	8	505	1.03	2.91	17.66019417	490.2912621
1901	0	20	1	3	542	1.62	1.05	5.938271605	334.5679012
1902	0	21	1	3	521	1.7	1.05	5.264705882	306.4705882
1903	0	22	1	3	552	1.96	1.34	5.030612245	281.6326531
1904	0	23	1	2	484	1.66	1.1	4.493975904	291.5662651
1905	0	24	1	1	506	1.62	1.1	4.37654321	312.345679
1906	0	2	0		203
1907	0	3	0		138
1908	0	20	1	3	128	1.16	0.37	2.75862069	110.3448276
1909	0	21	1	3	94	1.26	0.58	3.111111111	74.6031746
1910	0	22	1	6	112	1	0.99	6.31	112
1911	0	23	1	2	110	1.08	0.62	3.444444444	101.8518519
1912	0	24	1	3	111	1.21	0.56	2.983471074	91.73553719
1913	0	25	1	1	103	0.97	0.27	2.835051546	106.185567
1914	0	26	1	0	107	1.13	0.31	2.743362832	94.69026549
1916	0	0	0	2	105	0.71	0.11	7.492957746	147.8873239
1928	0	2	1	7	364	1.22	0.79	7.385245902	298.3606557
1929	0	3	1	12	381	1.18	0.85	8.56779661	322.8813559
1930	0	4	1	12	469	1.22	0.8	13.12295082	384.4262295
1931	0	5	1	13	421	0.97	0.67	14.51546392	434.0206186
1932	0	6	1	16	501	1.1	0.64	13.65454545	455.4545455
1933	0	7	1	16	452	1.15	0.8	11.51304348	393.0434783
1934	0	8	1	16	425	1.38	0.94	10.99275362	307.9710145
1935	0	2	1	7	186	1.02	1.12	5.568627451	182.3529412
1936	0	3	1	7	244	1.23	1.18	6.203252033	198.3739837
1937	0	4	1	7	266	1.37	0.97	3.408759124	194.1605839
1938	0	5	1	8	202	0.96	0.77	2.229166667	210.4166667
1939	0	6	1	8	188	1.01	0.67	2.118811881	186.1386139
1940	0	7	1	9	175	0.81	0.53	3.209876543	216.0493827
1941	0	8	1	9	169	1.03	0.43	2.689320388	164.0776699
1942	0	1	1	7	646	1.42	0.51	8.225352113	454.9295775
1943	0	3	1	9	652	1.49	0.7	7.348993289	437.5838926
1944	0	4	1	8	700	1.54	0.78	6.461038961	454.5454545
1945	0	5	1	5	752	1.83	1	5.74863388	410.9289617
1946	0	6	1	5	841	1.67	1.07	6.335329341	503.5928144
1947	0	5	0		200
1948	0	3	0	0	113	0.71	0.12	3.169014085	159.1549296
1949	0	5	0		137
1950	0	0	0	4	258	1.02	0.44	7.284313725	252.9411765
1951	0	0	1	4	315	0.51	0.5	16.29411765	617.6470588
1952	0	1	1	3	325	0.6	0.49	13.25	541.6666667
1953	0	2	1	1	303	0.81	0.45	4.925925926	374.0740741
1954	0	3	1	4	322	0.63	0.47	5.888888889	511.1111111
1955	0	4	1	6	346	0.76	0.57	6.486842105	455.2631579
1956	0	1	1	4	283	1.12	0.36	6.25	252.6785714
1957	0	1	1	13	285	0.83	0.37	10.28915663	343.373494
1958	0	2	1	19	260	0.57	0.49	15.12280702	456.1403509
1959	0	4	1	16	233	0.49	0.24	11.06122449	475.5102041
1960	0	3	1	7	186	0.47	0.15	14.63829787	395.7446809
1961	0	3	1	11	133	0.45	0.13	10.75555556	295.5555556
1962	0	4	1	8	175	0.63	0.16	9.317460317	277.7777778
1963	0	0	1	1	355	1	0.42	3.79	355
1964	0	1	1	2	347	1.27	0.34	3.244094488	273.2283465
1965	0	2	1	6	433	1.15	0.29	5.826086957	376.5217391
1966	0	3	1	14	429	0.78	0.19	8.615384615	550
1967	0	4	1	11	323	0.73	0.31	9.095890411	442.4657534
1968	0	0	0	0	334	1.84	1.42	4.663043478	181.5217391
1969	0	3	0	0	148	0.89	0.86	5.348314607	166.2921348
1970	0	1	0	5	331	1.76	1.48	8.755681818	188.0681818
1971	0	3	0	2	94	0.85	0.09	3.258823529	110.5882353
1972	0	0	1	5	257	0.97	0.47	12.95876289	264.9484536
1973	0	0	1	9	236	0.59	0.68	21.93220339	400
1974	0	1	1	10	240	0.62	0.59	22.53225806	387.0967742
1975	0	2	1	7	253	0.86	0.47	8.906976744	294.1860465
1976	0	0	1	9	254	1.05	0.43	11.65714286	241.9047619
1977	0	1	1	14	299	0.96	0.48	14.63541667	311.4583333
1978	0	2	1	10	278	1.19	0.57	11.19327731	233.6134454
1979	0	0	0	1	185	0.95	0.32	4.2	194.7368421
1980	0	0	0	2	160	0.6	0.33	3.233333333	266.6666667
1981	0	0	1	12	433	1.62	0.76	8.154320988	267.2839506
1982	0	1	1	10	439	1.91	0.92	6.732984293	229.8429319
1983	0	0	0	0	230	0.91	0.43	6.373626374	252.7472527
1984	0	0	1	10	165	0.48	0.25	19.4375	343.75
1985	0	1	1	12	197	0.67	0.29	18.71641791	294.0298507
1986	0	1	1	3	225	0.6	0.15	4.183333333	375
1987	0	1	1	6	231	0.62	0.24	4.693548387	372.5806452
1988	0	0	1	2	278	1.4	0.39	3.535714286	198.5714286
1989	0	0	1	1	190	1.25	0.25	6.632	152
1991	0	0	0		322	1.64	0.59	2.292682927	196.3414634
1992	0	0	1	0	235	2.61	0.87	3.444444444	90.03831418
1993	0	0	1	0	238	2.36	0.81	3.677966102	100.8474576
1994	0	0	1	6	249	0.64	0.33	11.859375	389.0625
1995	0	1	1	2	241	0.77	0.28	5.909090909	312.987013
1996	0	2	1	3	278	0.96	0.34	6.239583333	289.5833333
1997	0	3	1	5	294	0.79	0.36	6.341772152	372.1518987
1998	0	4	1	8	299	0.65	0.3	7.846153846	460
1999	0	1	0	0	182	1.07	0.73	2.887850467	170.0934579
2000	0	0	0	0	227	0.74	0.33	4.554054054	306.7567568
2001	0	0	1	1	295	2.4	0.56	3.3625	122.9166667
2002	0	0	0	1	141	0.89	0.37	1.359550562	158.4269663
2003	0	4	1	6	350	0.94	0.67	8.361702128	372.3404255
2004	0	4	1	6	369	1.1	0.76	8.254545455	335.4545455
2005	0	5	1	4	226	1.64	1.1	7.317073171	137.804878
2006	0	6	1	10	219	0.84	0.6	11.33333333	260.7142857
2007	0	7	1	9	256	0.79	0.57	11.98734177	324.0506329
2008	0	8	1	8	239	0.61	0.5	15.42622951	391.8032787
2009	0	9	1	8	284	0.91	0.8	10.10989011	312.0879121
2010	0	0	0	0	227	1.43	0.35	2.93006993	158.7412587
2011	0	0	1	2	398	0.84	0.63	5.607142857	473.8095238
2012	0	1	1	3	359	1.14	0.4	3.736842105	314.9122807
2013	0	2	1	7	362	1.01	0.52	5.346534653	358.4158416
2014	0	0	0	0	213	0.95	0.15	1.568421053	224.2105263
2015	0	2	1		94
2016	0	4	1		75
2017	0	1	0		228	1.12	0.66	3.6875	203.5714286
2018	0	2	0		225	1.09	0.73	3.660550459	206.4220183
[truncated: 589 more rows]
