# Supplementary material for: A novel haemocytometric COVID-19 prognostic score developed and validated in an observational multicentre European hospital-based study
Source: eLife journal article supplement (doi:10.7554/elife.63195), 2020-11-26
Supplement: supp [file elife-63195-supp-v1.zip › elife_poa_e63195_Table_6_source_data_1.csv]

Table 6 Source data file Mann-Whitney test for significance of the difference in prognostic score between critical illness (CI) and non-critical (NC) patients.
Filename	exclusion	Pat_ID	Baseline	length_of_hospitalisation	age	comorbidity_exists	Critical_or_Fatal	Riskscore complete
1	0	1	1	0	58	1	1	1
2	0	1	0	2	58	1	1	0
3	0	1	0	2	58	1	1	2
4	0	1	0	3	58	1	1	4
5	0	1	0	4	58	1	1	4
6	0	1	0	15	58	1	1	0
7	0	2	1	0	51	0	0	1
8	0	2	0	1	51	0	0	0
9	0	2	0	2	51	0	0	1
10	0	2	0	3	51	0	0	1
11	0	2	0	4	51	0	0	1
12	0	2	0	6	51	0	0	1
13	0	3	1	0	51	1	1	3
14	0	3	0	1	51	1	1	2
15	0	3	0	1	51	1	1	7
16	0	3	0	2	51	1	1	9
17	0	3	0	3	51	1	1	6
18	0	3	0	4	51	1	1	8
19	0	3	0	4	51	1	1	7
20	0	3	0	5	51	1	1	4
21	0	3	0	6	51	1	1	6
22	0	3	0	7	51	1	1	8
23	0	3	0	8	51	1	1	4
24	0	3	0	9	51	1	1	6
25	0	3	0	10	51	1	1	4
26	0	3	0	11	51	1	1	3
27	0	3	0	12	51	1	1	2
28	0	3	0	13	51	1	1	1
29	0	4	1	0	74	1	1	3
30	0	4	0	1	74	1	1	8
31	0	4	0	1	74	1	1	8
32	0	4	0	2	74	1	1	2
33	0	4	0	3	74	1	1	5
34	0	4	0	4	74	1	1	9
35	0	4	0	5	74	1	1	12
36	0	4	0	6	74	1	1	12
37	0	4	0	7	74	1	1	10
38	0	4	0	8	74	1	1	20
39	0	4	0	9	74	1	1	17
40	0	4	0	10	74	1	1	14
41	0	4	0	10	74	1	1	15
42	0	4	0	11	74	1	1	12
43	0	4	0	12	74	1	1	6
44	0	4	0	13	74	1	1	5
45	0	4	0	14	74	1	1	5
46	0	5	1	0	66	1	0	2
47	0	5	0	1	66	1	0	1
48	0	6	1	0	55	0	0	0
49	0	6	0	2	55	0	0	3
50	0	6	0	3	55	0	0	0
51	0	6	0	5	55	0	0	3
52	0	7	1	0	58	0	0	0
53	0	7	0	2	58	0	0	3
54	0	7	0	3	58	0	0	3
55	0	7	0	4	58	0	0	0
56	0	7	0	5	58	0	0	0
57	0	7	0	6	58	0	0	0
58	0	8	1	1	39	0	0
59	0	9	1	0	74	1	0	1
60	0	9	0	2	74	1	0
61	0	9	0	3	74	1	0	2
62	0	9	0	4	74	1	0	1
63	0	9	0	5	74	1	0	2
64	0	9	0	7	74	1	0	1
65	0	10	1	0	73	1	1	4
66	0	10	0	1	73	1	1	3
67	0	10	0	3	73	1	1	5
68	0	10	0	4	73	1	1	11
69	0	11	1	0	64	1	0	1
70	0	11	0	1	64	1	0	2
71	0	11	0	3	64	1	0	0
72	0	12	1	0	62	1	1	3
73	0	12	0	2	62	1	1	4
74	0	13	1	5	42	1	1
75	0	13	0	6	42	1	1	8
76	0	13	0	7	42	1	1	9
77	0	13	0	8	42	1	1	12
78	0	13	0	9	42	1	1	12
79	0	13	0	9	42	1	1	12
80	0	13	0	10	42	1	1	11
81	0	13	0	11	42	1	1	8
82	0	13	0	12	42	1	1	8
83	0	13	0	13	42	1	1	8
84	0	14	1	1	34	1	0
85	0	15	1	13	63	1	1
86	0	15	0	14	63	1	1	2
87	0	15	0	15	63	1	1	2
88	0	15	0	16	63	1	1	1
89	0	15	0	17	63	1	1	1
90	0	15	0	18	63	1	1	1
91	0	15	0	19	63	1	1	1
92	0	15	0	20	63	1	1	0
93	0	16	1	11	80	1	1
94	0	16	0	12	80	1	1	8
95	0	16	0	13	80	1	1	10
96	0	16	0	14	80	1	1	6
97	0	16	0	15	80	1	1	3
98	0	16	0	16	80	1	1	7
99	0	16	0	17	80	1	1	13
100	0	16	0	18	80	1	1	7
101	0	16	0	19	80	1	1	8
102	0	17	1	1	68	1	0
103	0	17	0	2	68	1	0	0
104	0	17	0	4	68	1	0	0
105	0	18	1	0	78	0	1	7
106	0	18	0	2	78	0	1	3
107	0	18	0	2	78	0	1	7
108	0	18	0	3	78	0	1	7
109	0	18	0	4	78	0	1	9
110	0	19	1	0	88	1	1	1
111	0	19	0	1	88	1	1	0
112	0	19	0	3	88	1	1	1
113	0	20	1	0	58	1	0	0
114	0	20	0	1	58	1	0	3
115	0	20	0	3	58	1	0	0
116	0	21	1	0	67	1	1
117	0	22	1	0	63	0	0
118	0	23	1	0	69	0	0
119	0	24	1	0	62	1	0
120	0	25	1	0	81	1	1
121	0	26	1	0	60	1	0
122	0	27	1	0	70	1	0
123	0	28	1	0	58	0	0
124	0	29	1	0	49	0	0
125	0	30	1	0	67	1	1
126	0	30	0	4	67	1	1
127	0	31	1	0	62	1	0
128	0	32	1	0	80	0	1
129	0	33	1	0	78	1	1
130	0	34	1	0	71	1	1
131	0	35	1	0	47	0	0
132	0	36	1	0	52	0	1	2
133	0	37	1	0	73	1	0
134	0	38	1	0	74	1	1
135	0	39	1	0	58	0	0
136	0	40	1	0	74	1	0
137	0	41	1	0	72	0	0
138	0	42	1	0	35	0	0
139	0	43	1	0	75	1	0
140	0	44	1	0	91	1	0
141	0	45	1	0	68	0	1
142	0	45	0	1	68	0	1
143	0	45	0	1	68	0	1
144	0	45	0	2	68	0	1
145	0	45	0	3	68	0	1
146	0	45	0	4	68	0	1
147	0	45	0	5	68	0	1
148	0	45	0	5	68	0	1
149	0	45	0	6	68	0	1
150	0	45	0	6	68	0	1
151	0	45	0	7	68	0	1
152	0	45	0	7	68	0	1
153	0	45	0	8	68	0	1
154	0	45	0	9	68	0	1
155	0	45	0	10	68	0	1
156	0	45	0	11	68	0	1
157	0	45	0	12	68	0	1
158	0	45	0	13	68	0	1
159	0	45	0	14	68	0	1
160	0	45	0	15	68	0	1
161	0	45	0	16	68	0	1
162	0	45	0	17	68	0	1
163	0	45	0	18	68	0	1
164	0	45	0	19	68	0	1
165	0	45	0	20	68	0	1
166	0	45	0	21	68	0	1
167	0	45	0	22	68	0	1
168	0	46	1	0	75	1	0
169	0	47	1	0	73	1	0
170	0	48	1	0	74	1	1
171	0	49	1	0	82	0	1
172	0	50	1	0	75	1	0
173	0	51	1	0	63	0	0
174	0	52	1	0	74	1	1
175	0	53	1	0	64	0	1
176	0	54	1	0	83	1	1
177	0	54	0	4	83	1	1
178	0	54	0	10	83	1	1
179	0	54	0	11	83	1	1
180	0	55	1	0	70	1	0
181	0	56	1	0	67	1	1
182	0	57	1	0	71	1	0
183	0	58	1	0	81	1	0
184	0	59	1	0	66	1	0
185	0	60	1	0	82	1	0
186	0	61	1	0	87	0	0
187	0	62	1	0	83	1	1
188	0	63	1	0	68	1	0
189	0	64	1	0	25	1	0
190	0	65	1	0	65	0	0
191	0	66	1	0	73	1	1
192	0	67	1	0	58	0	0
193	0	68	1	0	73	1	0
194	0	69	1	0	69	0	0
195	0	70	1	0	57	1	0
196	0	71	1	0	77	1	0
197	0	72	1	0	60	1	0
198	0	73	1	0	36	0	0
199	0	74	1	0	72	1	0
200	0	75	1	0	58	1	0
201	0	76	1	0	42	0	0
202	0	77	1	0	90	1	0
203	0	78	1	0	77	0	1
204	0	79	1	0	52	1	0
205	0	79	0	0	52	1	0
206	0	79	0	1	52	1	0
207	0	79	0	2	52	1	0
208	0	79	0	3	52	1	0
209	0	79	0	5	52	1	0
210	0	79	0	7	52	1	0
211	0	79	0	8	52	1	0
212	0	79	0	9	52	1	0
213	0	79	0	10	52	1	0
214	0	79	0	12	52	1	0
215	0	80	1	0	59	0	0
216	0	81	1	0	73	1	1
217	0	82	1	0	57	1	0
218	0	83	1	0	37	0	0
220	0	85	1	0	32	0	1
221	0	86	1	0	86	1	1
222	0	87	1	0	55	0	0
223	0	88	1	0	62	0	0
225	0	90	1	0	92	0	0
226	0	91	1	0	54	0	0
227	0	92	1	0	68	0	0
228	0	93	1	0	71	1	1
229	0	93	0	1	71	1	1
230	0	93	0	2	71	1	1
231	0	94	1	0	66	1	0
232	0	95	1	0	82	0	0
233	0	96	1	0	89	1	1
234	0	97	1	0	62	1	0
235	0	98	1	0	78	1	0
236	0	98	0	2	78	1	0
237	0	98	0	4	78	1	0
238	0	98	0	5	78	1	0
239	0	98	0	13	78	1	0
240	0	99	1	0	83	1	1
241	0	99	0	1	83	0	1
242	0	99	0	2	83	1	1
243	0	99	0	3	83	1	1
244	0	99	0	4	83	0	1
245	0	99	0	5	83	1	1
246	0	100	1	0	80	1	1
247	0	101	1	0	87	0	1
248	0	102	1	0	58	0	0
249	0	103	1	0	67	1	1
250	0	103	0	1	67	1	1
251	0	104	1	0	72	1	1
252	0	105	1	0	39	0	0
253	0	106	1	0	85	1	1
254	0	107	1	0	40	0	0
255	0	108	1	0	69	1	0
256	0	109	1	0	71	1	1
257	0	110	1	0	57	1	0
258	0	110	0	1	57	0	0
259	0	110	0	2	57	1	0
260	0	110	0	3	57	1	0
261	0	110	0	4	57	1	0
262	0	110	0	5	57	1	0
263	0	110	0	6	57	1	0
264	0	110	0	7	57	1	0
265	0	110	0	7	57	1	0
266	0	110	0	8	57	1	0
267	0	110	0	9	57	1	0
268	0	110	0	10	57	1	0
269	0	110	0	11	57	0	0
270	0	110	0	12	57	1	0
271	0	110	0	13	57	0	0
272	0	110	0	16	57	1	0
273	0	110	0	17	57	1	0
274	0	110	0	20	57	1	0
275	0	111	1	0	75	1	0
276	0	112	1	0	52	1	0
277	0	113	1	0	56	1	0
278	0	114	1	0	73	1	1
279	0	115	1	0	57	1	1
280	0	116	1	0	84	1	1
281	0	117	1	0	57	0	0
282	0	118	1	0	89	1	1
283	0	119	1	0	86	1	1
284	0	120	1	0	68	1	1
285	0	121	1	0	69	1	1
286	0	122	1	0	49	0	0
287	0	122	0	4	49	0	0
288	0	122	0	7	49	0	0
289	0	122	0	9	49	0	0
290	0	123	1	0	82	0	1
291	0	124	1	0	68	1	0
292	0	125	1	0	63	1	0
293	0	126	1	0	81	1	1
294	0	126	0	2	81	1	1
295	0	127	1	0	52	0	0
296	0	127	0	4	52	0	0
297	0	128	1	0	78	1	1
298	0	129	1	0	84	0	0
299	0	130	1	0	73	1	1
300	0	131	1	0	90	1	1
301	0	132	1	0	84	1	1
302	0	133	1	0	62	1	1
303	0	134	1	0	80	1	1
304	0	134	0	2	80	1	1
305	0	134	0	3	80	1	1
306	0	135	1	0	66	1	0
307	0	136	1	0	61	0	0
308	0	136	0	5	61	0	0
309	0	136	0	7	61	0	0
310	0	136	0	8	61	0	0
311	0	136	0	9	61	0	0
312	0	136	0	10	61	0	0
313	0	136	0	11	61	0	0
314	0	136	0	12	61	0	0
315	0	136	0	13	61	0	0
316	0	136	0	14	61	0	0
317	0	137	1	0	82	1	1
318	0	137	0	1	82	1	1
319	0	137	0	2	82	1	1
320	0	137	0	4	82	1	1
321	0	138	1	0	67	1	0
322	0	139	1	0	69	0	0
323	0	140	1	0	47	0	0
324	0	140	0	2	47	0	0
325	0	140	0	6	47	0	0
326	0	141	1	0	47	0	0
327	0	142	1	0	71	0	1
328	0	143	1	0	74	1	1
329	0	144	1	0	36	1	0
330	0	145	1	0	49	1	0
331	0	146	1	0	54	0	0
332	0	147	1	0	89	1	1
333	0	148	1	0	77	1	1
334	0	149	1	0	76	0	0
335	0	150	1	0	56	0	1
336	0	151	1	0	64	1	1
337	0	152	1	0	66	0	0
338	0	153	1	0	96	1	0
339	0	154	1	0	60	1	0
340	0	155	1	0	84	1	0
341	0	156	1	0	72	0	0
342	0	157	1	0	81	1	1
343	0	158	1	0	54	0	0
344	0	159	1	0	71	0	0
345	0	160	1	0	37	0	0
346	0	161	1	0	81	1	1
347	0	162	1	0	90	0	1
348	0	163	1	0	50	1	0
349	0	164	1	0	68	0	1
350	0	165	1	0	56	0	1
351	0	166	1	0	74	0	1
352	0	167	1	0	55	1	0
353	0	168	1	0	59	0	0
355	0	170	1	0	81	1	0
356	0	171	1	0	73	1	0
357	0	172	1	0	87	1	0
358	0	173	1	0	57	0	1
359	0	174	1	0	65	1	0
360	0	175	1	0	91	1	1
361	0	176	1	0	67	1	0
362	0	177	1	0	64	1	0
363	0	178	1	0	67	1	1
364	0	179	1	0	75	1	0
365	0	179	0	2	75	1	0
366	0	179	0	3	75	1	0
367	0	179	0	5	75	1	0
368	0	179	0	6	75	1	0
369	0	179	0	6	75	1	0
370	0	179	0	7	75	1	0
371	0	179	0	8	75	1	0
372	0	179	0	9	75	1	0
373	0	179	0	10	75	1	0
374	0	179	0	11	75	1	0
375	0	179	0	12	75	0	0
376	0	179	0	13	75	1	0
377	0	179	0	14	75	1	0
378	0	179	0	15	75	1	0
379	0	179	0	16	75	1	0
380	0	180	1	0	67	1	1
381	0	181	1	0	36	1	0
382	0	182	1	0	67	1	0
383	0	183	1	0	53	1	0
384	0	184	1	0	74	1	0
385	0	185	1	0	70	1	0
386	0	186	1	0	76	1	1
387	0	187	1	0	78	1	0
388	0	188	1	0	70	1	1
389	0	189	1	0	93	1	1
390	0	189	0	2	93	1	1
391	0	189	0	4	93	1	1
392	0	190	1	0	50	1	0
393	0	191	1	0	85	1	0
394	0	192	1	0	74	1	0
395	0	193	1	0	53	0	0
396	0	194	1	0	84	1	1
397	0	195	1	0	58	0	0
398	0	196	1	0	91	1	1
399	0	197	1	0	54	1	0
400	0	198	1	0	58	1	0
401	0	199	1	0	77	1	1
402	0	200	1	0	72	0	1
403	0	201	1	0	61	1	1
404	0	202	1	0	76	1	1
405	0	203	1	0	43	0	1
406	0	204	1	0	69	1	0
407	0	205	1	0	57	1	0
408	0	206	1	0	48	1	0
409	0	207	1	0	62	1	0
410	0	208	1	0	95	1	1
411	0	209	1	0	45	0	0
412	0	210	1	0	66	1	1
413	0	211	1	0	77	1	0
414	0	212	1	0	67	1	1	2
415	0	213	1	0	72	1	1
416	0	214	1	0	81	1	1
417	0	215	1	0	76	1	1
418	0	216	1	0	64	0	0
419	0	216	0	2	64	0	0
420	0	216	0	3	64	0	0
421	0	216	0	4	64	0	0
422	0	216	0	6	64	0	0
423	0	216	0	7	64	0	0
424	0	216	0	9	64	0	0
425	0	217	1	0	91	1	1
426	0	217	0	3	91	1	1
427	0	217	0	5	91	1	1
428	0	217	0	7	91	1	1
429	0	218	1	0	83	0	0
430	0	219	1	0	64	1	0
431	0	220	1	0	68	1	1
432	0	221	1	0	76	1	0
433	0	222	1	0	83	1	0
434	0	223	1	0	86	0	1
435	0	224	1	0	77	1	1
436	0	225	1	0	58	1	1
437	0	226	1	0	67	0	0
438	0	227	1	0	74	1	0
439	0	228	1	0	35	1	0
440	0	229	1	0	48	0	0
441	0	230	1	0	44	0	0
442	0	231	1	0	83	1	1
443	0	232	1	0	66	1	0
444	0	233	1	0	53	0	0	0
445	0	234	1	0	76	1	0
446	0	235	1	0	76	1	0
447	0	236	1	0	57	0	0
448	0	237	1	1	79	1	1	15
449	0	237	0	1	79	1	1	15
450	0	237	0	1	79	1	1	15
451	0	237	0	2	79	1	1	15
452	0	237	0	3	79	1	1	16
453	0	237	0	4	79	1	1	16
454	0	237	0	5	79	1	1	15
455	0	238	1	11	45	0	1	11
456	0	238	0	12	45	0	1	7
457	0	238	0	13	45	0	1	6
458	0	238	0	14	45	0	1	6
459	0	238	0	15	45	0	1	9
460	0	238	0	16	45	0	1	7
461	0	239	1	0	53	0	0	4
462	0	240	1	1	62	0	0	2
463	0	240	0	3	62	0	0	8
464	0	240	0	4	62	0	0	7
465	0	241	1	0	68	1	1	10
466	0	241	0	0	68	1	1
467	0	241	0	1	68	1	1
468	0	241	0	2	68	1	1	9
469	0	241	0	2	68	1	1	10
470	0	241	0	3	68	1	1	10
471	0	241	0	4	68	1	1	11
472	0	241	0	5	68	1	1	6
473	0	241	0	5	68	1	1	4
474	0	241	0	6	68	1	1	6
475	0	242	1	0	75	1	1	9
476	0	242	0	1	75	1	1	11
477	0	242	0	1	75	1	1	11
478	0	242	0	1	75	1	1	6
479	0	242	0	2	75	1	1	7
480	0	242	0	2	75	1	1	7
481	0	243	1	8	61	0	1	6
482	0	243	0	9	61	0	1	8
483	0	243	0	9	61	0	1	10
484	0	243	0	10	61	0	1	11
485	0	243	0	11	61	0	1	11
486	0	244	1	2	60	0	0	1
487	0	244	0	6	60	0	0	0
488	0	245	1	2	58	0	1	13
489	0	246	1	0	67	0	0	4
490	0	246	0	2	67	0	0	4
491	0	247	1	2	76	0	0	6
492	0	247	0	4	76	0	0	6
493	0	247	0	5	76	0	0	6
494	0	247	0	6	76	0	0	6
495	0	248	1	1	53	0	0	1
496	0	248	0	2	53	0	0	1
497	0	248	0	3	53	0	0	1
498	0	248	0	4	53	0	0	2
499	0	249	1	2	56	1	1	16
500	0	249	0	3	56	1	1	11
501	0	249	0	3	56	1	1	14
502	0	249	0	4	56	1	1	13
503	0	249	0	4	56	1	1	13
504	0	249	0	4	56	1	1	12
505	0	249	0	5	56	1	1	13
506	0	249	0	6	56	1	1	10
507	0	249	0	7	56	1	1	12
508	0	250	1	2	71	1	0	2
509	0	250	0	5	71	1	0	2
510	0	250	0	6	71	1	0	3
511	0	251	1	2	66	1	0	2
512	0	251	0	3	66	1	0	2
513	0	251	0	5	66	1	0	1
514	0	252	1	7	48	0	1	0
515	0	252	0	8	48	0	1	1
516	0	252	0	9	48	0	1	1
517	0	252	0	10	48	0	1	0
518	0	252	0	11	48	0	1	0
519	0	252	0	12	48	0	1	3
520	0	253	1	6	71	0	1	7
521	0	253	0	7	71	0	1	5
522	0	253	0	7	71	0	1	6
523	0	253	0	7	71	0	1	6
524	0	253	0	7	71	0	1	10
525	0	253	0	8	71	0	1	6
526	0	253	0	9	71	0	1	7
527	0	254	1	6	73	1	1	14
528	0	255	1	6	67	0	0	9
529	0	255	0	7	67	0	0	7
530	0	255	0	8	67	0	0	3
531	0	255	0	9	67	0	0	2
532	0	255	0	10	67	0	0	1
533	0	256	1	1	68	1	0	8
534	0	256	0	2	68	1	0	7
535	0	257	1	1	78	1	1	6
536	0	257	0	3	78	1	1	5
537	0	257	0	4	78	1	1	9
538	0	257	0	5	78	1	1	12
539	0	258	1	2	52	0	0	1
540	0	258	0	3	52	0	0	0
541	0	259	1	7	74	1	0	2
542	0	259	0	8	74	1	0	3
543	0	260	1	0	79	1	1	4
544	0	260	0	2	79	1	1	5
545	0	260	0	4	79	1	1	6
546	0	260	0	5	79	1	1	6
547	0	260	0	6	79	1	1	6
548	0	261	1	6	43	0	1	7
549	0	261	0	7	43	0	1	13
550	0	261	0	8	43	0	1	9
551	0	261	0	9	43	0	1	10
552	0	261	0	11	43	0	1	8
553	0	261	0	12	43	0	1	5
554	0	261	0	12	43	0	1	8
555	0	262	1	2	74	0	0	5
556	0	262	0	4	74	0	0	4
557	0	262	0	5	74	0	0	4
558	0	262	0	6	74	0	0	2
559	0	262	0	7	74	0	0	8
560	0	263	1	7	77	0	0	2
561	0	263	0	11	77	0	0	1
562	0	263	0	12	77	0	0	0
563	0	264	1	3	69	1	0	0
564	0	264	0	4	69	1	0	0
565	0	264	0	5	69	1	0	0
566	0	264	0	7	69	1	0	0
567	0	265	1	0	55	0	1	1
568	0	265	0	1	55	0	1	3
569	0	265	0	2	55	0	1	1
570	0	266	1	0	57	1	1
571	0	266	0	4	57	1	1	11
572	0	266	0	5	57	1	1	13
573	0	266	0	6	57	1	1	12
574	0	266	0	7	57	1	1	14
575	0	267	1	0	66	1	0	0
576	0	267	0	2	66	1	0	0
577	0	268	1	2	54	0	1	7
578	0	268	0	2	54	0	1	8
579	0	268	0	3	54	0	1	7
580	0	268	0	3	54	0	1	9
581	0	269	1	4	51	1	0	0
582	0	270	1	3	79	1	1	15
583	0	270	0	4	79	1	1	11
584	0	270	0	5	79	1	1	16
585	0	271	1	7	75	0	1	12
586	0	271	0	8	75	0	1	13
587	0	271	0	9	75	0	1	14
588	0	271	0	9	75	0	1	7
589	0	272	1	0	70	1	0	2
590	0	272	0	2	70	1	0	6
591	0	272	0	5	70	1	0	4
592	0	273	1	0	83	1	0
593	0	274	1	1	54	0	0	1
594	0	274	0	3	54	0	0	5
595	0	274	0	4	54	0	0	4
596	0	275	1	2	86	1	1	6
597	0	275	0	3	86	1	1	5
598	0	275	0	4	86	1	1	6
599	0	275	0	5	86	1	1	8
600	0	275	0	6	86	1	1	11
601	0	275	0	7	86	1	1	10
602	0	276	1	6	53	0	0	1
603	0	276	0	8	53	0	0	2
604	0	276	0	9	53	0	0	1
605	0	277	1	2	62	0	0	2
606	0	277	0	4	62	0	0	2
607	0	277	0	6	62	0	0	2
608	0	277	0	7	62	0	0	1
609	0	278	1	2	69	1	0	2
610	0	278	0	3	69	1	0	3
611	0	278	0	4	69	1	0	2
612	0	279	1	0	77	1	0
613	0	279	0	2	77	1	0
614	0	279	0	6	77	1	0	7
615	0	279	0	9	77	1	0	10
616	0	280	1	0	72	0	0	2
617	0	281	1	16	77	0	1	10
618	0	282	1	5	87	0	0	1
619	0	283	1	1	66	1	1	2
620	0	284	1	4	82	1	0	2
621	0	284	0	5	82	1	0	2
622	0	284	0	6	82	1	0	2
623	0	284	0	7	82	1	0	2
624	0	285	1	1	78	1	0	3
625	0	285	0	3	78	1	0	2
626	0	285	0	4	78	1	0	1
627	0	286	1	0	69	1	0	0
628	0	286	0	2	69	1	0	2
629	0	286	0	3	69	1	0	0
630	0	286	0	5	69	1	0	0
631	0	287	1	4	77	1	0	3
632	0	287	0	6	77	1	0	0
633	0	288	1	7	66	1	1	11
634	0	288	0	8	66	1	1	14
635	0	288	0	8	66	1	1	15
636	0	288	0	9	66	1	1	13
637	0	288	0	9	66	1	1	12
638	0	288	0	9	66	1	1	12
639	0	288	0	9	66	1	1	12
640	0	288	0	10	66	1	1	8
641	0	288	0	11	66	1	1	10
642	0	288	0	11	66	1	1	7
643	0	288	0	11	66	1	1	11
644	0	289	1	2	75	1	0	6
645	0	290	1	2	84	1	0	17
646	0	290	0	4	84	1	0	9
647	0	290	0	6	84	1	0	11
648	0	291	1	2	87	1	0	4
649	0	291	0	4	87	1	0	5
650	0	291	0	6	87	1	0	4
651	0	292	1	3	59	0	1	0
652	0	292	0	4	59	0	1	3
653	0	292	0	5	59	0	1	0
654	0	293	1	15	69	1	0	14
655	0	293	0	17	69	1	0	8
656	0	294	1	4	69	1	0	4
657	0	294	0	6	69	1	0	4
658	0	294	0	7	69	1	0	7
659	0	295	1	25	82	1	1	13
660	0	296	1	3	74	1	0	2
661	0	296	0	4	74	1	0	1
662	0	297	1	2	55	0	0	2
663	0	297	0	4	55	0	0	0
664	0	298	1	0	30	0	0	0
665	0	298	0	2	30	0	0	0
666	0	298	0	3	30	0	0	0
667	0	298	0	4	30	0	0	1
668	0	298	0	5	30	0	0	0
669	0	299	1	3	58	1	0	8
670	0	299	0	5	58	1	0	3
671	0	299	0	7	58	1	0	5
672	0	300	1	2	55	1	0	8
673	0	300	0	3	55	1	0	7
674	0	300	0	4	55	1	0	6
675	0	300	0	6	55	1	0	4
676	0	301	1	0	86	0	0
677	0	301	0	9	86	0	0	0
678	0	301	0	12	86	0	0	0
679	0	302	1	2	93	0	0	1
680	0	302	0	3	93	0	0	0
681	0	302	0	4	93	0	0	2
682	0	303	1	2	74	1	0	4
683	0	304	1	2	73	0	0	8
684	0	305	1	3	73	1	0
685	0	305	0	4	73	1	0	3
686	0	306	1	1	57	0	0	3
687	0	307	1	1	84	0	1
688	0	307	0	3	84	0	1	7
689	0	307	0	4	84	0	1	6
690	0	308	1	1	81	1	1	2
691	0	308	0	2	81	1	1	6
692	0	309	1	1	87	1	1
693	0	309	0	2	87	1	1	6
694	0	309	0	3	87	1	1
695	0	309	0	3	87	1	1	8
696	0	309	0	4	87	1	1	7
697	0	310	1	1	57	0	0
698	0	310	0	3	57	0	0	3
699	0	310	0	4	57	0	0	2
700	0	311	1	2	86	1	0	4
701	0	311	0	3	86	1	0	5
702	0	311	0	4	86	1	0	2
703	0	312	1	2	76	1	0	9
704	0	312	0	3	76	1	0	4
705	0	313	1	2	41	1	0	2
706	0	313	0	3	41	1	0	1
707	0	313	0	4	41	1	0	3
708	0	314	1	2	52	0	0	0
709	0	314	0	3	52	0	0	0
710	0	314	0	4	52	0	0	0
711	0	315	1	2	65	1	1	9
712	0	316	1	2	70	1	0	1
715	0	318	1	1	72		0	2
716	0	318	0	2	72		0
717	0	318	0	4	72		0	5
718	0	318	0	7	72		0	6
719	0	318	0	9	72		0
720	0	319	1	2	65		1	13
721	0	319	0	3	65		1	13
722	0	319	0	4	65		1	15
723	0	319	0	5	65		1	14
724	0	319	0	6	65		1	12
725	0	319	0	9	65		1	10
726	0	319	0	10	65		1	9
727	0	319	0	11	65		1	7
728	0	319	0	12	65		1	2
729	0	319	0	13	65		1	9
730	0	320	1	0	63		1	10
731	0	321	1	0	48		0	5
732	0	321	0	3	48		0	5
733	0	322	1	0	76		0	1
734	0	322	0	1	76		0	0
735	0	323	1	0	48		0	0
736	0	323	0	4	48		0	2
737	0	324	1	3	68		0	1
738	0	325	1	2	51		0	3
739	0	326	1	0	73		1	15
740	0	326	0	1	73		1	10
741	0	326	0	2	73		1	16
742	0	326	0	3	73		1	14
743	0	326	0	4	73		1	12
744	0	327	1	1	78		0	2
745	0	328	1	2	75		1
746	0	328	0	3	75		1	18
747	0	329	1	0	55		0	9
748	0	329	0	1	55		0	8
749	0	329	0	2	55		0	7
750	0	329	0	3	55		0	6
751	0	330	1	0	48		0	3
752	0	331	1	8	78		1	20
753	0	331	0	9	78		1	14
754	0	331	0	10	78		1	14
755	0	331	0	11	78		1	13
756	0	331	0	14	78		1	13
757	0	331	0	15	78		1	11
758	0	331	0	16	78		1	7
759	0	331	0	17	78		1	3
760	0	331	0	18	78		1	3
761	0	332	1	0	61		1	2
762	0	332	0	0	61		1	7
763	0	333	1	5	28		1	8
764	0	333	0	6	28		1	7
765	0	333	0	7	28		1	8
766	0	334	1	2	64		0	3
767	0	334	0	3	64		0
768	0	335	1	10	69		1	1
769	0	335	0	11	69		1	0
770	0	335	0	12	69		1	1
771	0	335	0	13	69		1	1
772	0	335	0	14	69		1	0
773	0	335	0	19	69		1	0
774	0	335	0	20	69		1	0
775	0	335	0	21	69		1	0
776	0	336	1	1	89		1	0
777	0	337	1	0	81		0	4
778	0	338	1	3	79		0	0
779	0	339	1	0	48		0	0
780	0	340	1	0	35		0	0
781	0	341	1	9	74		1	11
782	0	341	0	12	74		1	11
783	0	341	0	13	74		1	8
784	0	341	0	14	74		1	8
785	0	341	0	15	74		1	10
786	0	341	0	16	74		1	8
787	0	341	0	21	74		1	13
788	0	341	0	22	74		1	12
789	0	341	0	23	74		1	11
790	0	342	1	0	76		0	3
791	0	343	1	3	68		0	4
792	0	344	1	0	68		0	5
793	0	345	1	2	79		1	6
794	0	346	1	0	72		0	0
795	0	346	0	3	72		0	6
796	0	347	1	10	74		0	4
797	0	347	0	11	74		0	0
798	0	348	1	3	78		1	8
799	0	348	0	6	78		1	7
800	0	349	1	4	49		1	6
801	0	349	0	4	49		1	9
802	0	349	0	5	49		1	3
803	0	349	0	6	49		1	8
804	0	349	0	7	49		1	5
805	0	349	0	12	49		1	1
806	0	349	0	13	49		1	1
807	0	349	0	14	49		1	1
808	0	349	0	15	49		1	0
809	0	350	1	5	56		1	3
810	0	350	0	8	56		1	2
811	0	350	0	9	56		1	5
812	0	350	0	10	56		1	6
813	0	350	0	11	56		1	6
814	0	350	0	12	56		1	5
815	0	350	0	17	56		1	0
816	0	350	0	18	56		1	0
817	0	350	0	19	56		1	0
818	0	351	1	5	45		0	0
819	0	352	1	0	71		0	0
820	0	352	0	2	71		0	0
821	0	353	1	2	52		1	11
822	0	353	0	3	52		1	8
823	0	353	0	4	52		1	10
824	0	354	1	3	72		0	0
825	0	355	1	1	51		1	3
826	0	355	0	5	51		1	8
827	0	355	0	6	51		1	12
828	0	355	0	7	51		1	12
829	0	355	0	8	51		1	14
830	0	355	0	11	51		1	12
831	0	355	0	12	51		1	15
832	0	355	0	13	51		1	10
833	0	355	0	14	51		1	9
834	0	355	0	15	51		1	8
835	0	356	1	2	55		1	1
836	0	356	0	5	55		1	1
837	0	356	0	6	55		1	1
838	0	356	0	7	55		1	8
839	0	356	0	8	55		1	9
840	0	356	0	9	55		1	8
841	0	356	0	12	55		1	4
842	0	356	0	13	55		1	5
843	0	356	0	14	55		1	2
844	0	356	0	15	55		1	5
845	0	356	0	16	55		1	2
846	0	357	1	0	64		0	2
847	0	358	1	0	31		0	0
848	0	359	1	1	85		0	2
849	0	359	0	3	85		0	2
850	0	359	0	9	85		0	2
851	0	360	1	1	64		1	1
852	0	360	0	2	64		1	1
853	0	360	0	3	64		1	2
854	0	360	0	4	64		1	1
855	0	360	0	7	64		1	5
856	0	360	0	8	64		1	5
857	0	360	0	9	64		1	11
858	0	360	0	10	64		1	4
859	0	360	0	10	64		1	4
860	0	360	0	11	64		1	4
861	0	361	1	1	52		1	3
862	0	361	0	2	52		1	11
863	0	361	0	9	52		1	10
864	0	361	0	10	52		1	5
865	0	361	0	11	52		1	5
866	0	362	1	0	43		0	0
867	0	363	1	2	75		0	6
868	0	364	1	4	57		0	3
869	0	364	0	6	57		0	0
870	0	365	1	0	53		0	2
871	0	365	0	5	53		0	3
872	0	365	0	6	53		0	7
873	0	365	0	7	53		0	7
874	0	365	0	8	53		0	7
875	0	365	0	9	53		0	3
876	0	366	1	3	51		0	1
877	0	367	1	0	55		0	1
878	0	367	0	2	55		0	3
879	0	368	1	10	53		1	1
880	0	369	1	3	58		0	3
881	0	369	0	5	58		0	1
882	0	369	0	8	58		0	1
883	0	370	1	0	65		0	1
884	0	371	1	0	56		0	0
885	0	372	1	5	73		0	4
886	0	373	1	0	73		0	3
887	0	374	1	0	40		0	5
888	0	375	1	0	73		0	1
889	0	375	0	2	73		0	2
890	0	375	0	6	73		0	6
891	0	376	1	0	54		0	0
892	0	376	0	0	54		0	1
893	0	377	1	0	50		1	6
894	0	377	0	1	50		1	7
895	0	377	0	2	50		1	15
896	0	377	0	5	50		1	8
897	0	377	0	6	50		1	8
898	0	377	0	7	50		1	7
899	0	377	0	8	50		1	8
900	0	377	0	9	50		1	8
901	0	378	1	0	60		1	5
902	0	378	0	2	60		1	8
903	0	378	0	3	60		1	12
904	0	378	0	6	60		1	16
905	0	378	0	7	60		1	18
906	0	378	0	8	60		1	17
907	0	378	0	9	60		1	16
908	0	378	0	10	60		1	15
909	0	379	1	0	49		0	0
910	0	380	1	0	51		0	0
911	0	381	1	2	55		0	2
912	0	382	1	2	74		1	4
913	0	383	1	4	70		0	11
914	0	384	1	1	64		1	12
915	0	384	0	2	64		1	16
916	0	384	0	5	64		1	12
917	0	384	0	6	64		1	12
918	0	384	0	7	64		1	3
919	0	384	0	8	64		1	8
920	0	384	0	8	64		1	8
921	0	385	1	1	64		1	3
922	0	386	1	0	71		0	1
923	0	386	0	1	71		0	2
924	0	387	1	4	77		0	5
925	0	388	1	1	69		0	2
926	0	389	1	2	76		0	5
927	0	389	0	6	76		0	4
928	0	390	1	2	80		0	10
929	0	390	0	6	80		0	3
930	0	390	0	10	80		0	5
931	0	391	1	0	84		1	13
932	0	392	1	2	85		1	6
933	0	392	0	5	85		1	5
934	0	393	1	5	83		0	1
935	0	394	1	2	51		0	0
936	0	395	1	2	67		0	2
937	0	396	1	2	70		0	0
938	0	397	1	2	79		0	1
939	0	397	0	5	79		0	0
940	0	398	1	6	63		0	6
941	0	399	1	2	72		0	4
942	0	400	1	0	87		0	1
943	0	400	0	1	87		0	1
944	0	400	0	4	87		0	5
945	0	401	1	4	53		1	9
946	0	401	0	5	53		1	5
947	0	401	0	6	53		1	6
948	0	401	0	7	53		1	3
949	0	401	0	8	53		1	4
950	0	402	1	3	85		0	7
951	0	403	1	2	77		0	4
952	0	404	1	2	71		0	4
953	0	405	1	2	55		1	0
954	0	405	0	5	55		1	5
955	0	405	0	5	55		1	3
956	0	405	0	6	55		1	5
957	0	406	1	0	71		1	4
958	0	406	0	2	71		1	10
959	0	406	0	3	71		1	8
960	0	406	0	4	71		1	3
961	0	407	1	2	75		0	1
962	0	407	0	6	75		0	10
963	0	407	0	7	75		0	11
964	0	407	0	9	75		0	16
965	0	407	0	13	75		0	12
966	0	408	1	0	73		0	0
967	0	408	0	3	73		0	2
968	0	409	1	2	75		0	7
969	0	409	0	5	75		0	8
970	0	410	1	0	74		0	3
971	0	410	0	2	74		0
972	0	411	1	0	62		0	1
973	0	412	1	2	63		1	1
974	0	412	0	5	63		1	3
975	0	412	0	6	63		1	11
976	0	413	1	0	68		1	1
977	0	413	0	3	68		1	8
978	0	413	0	4	68		1	8
979	0	413	0	5	68		1	6
980	0	413	0	6	68		1	9
981	0	413	0	7	68		1	6
982	0	414	1	1	78	1	0
983	0	415	1	1	72	1	0	1
984	0	416	1	0	72	1	0	4
985	0	416	0	1	72	1	0
986	0	417	1	0	66	1	0	1
987	0	417	0	1	66	1	0
988	0	417	0	2	66	1	0
989	0	417	0	4	66	1	0
990	0	417	0	7	66	1	0
991	0	417	0	9	66	1	0
992	0	418	1	13	75	1	0
993	0	418	0	14	75	1	0
994	0	418	0	17	75	1	0
995	0	418	0	18	75	1	0
996	0	418	0	19	75	1	0
997	0	418	0	21	75	1	0
998	0	418	0	24	75	1	0
999	0	418	0	26	75	1	0
1000	0	419	1	0	76	1	0
1001	0	419	0	2	76	1	0
1002	0	419	0	3	76	1	0
1003	0	420	1	0	71	0	1
1004	0	420	0	1	71	0	1
1005	0	421	1	0	85	0	1
1006	0	421	0	0	85	0	1
1007	0	422	1	0	87	0	1	8
1008	0	422	0	1	87	0	1
1009	0	422	0	2	87	0	1
1010	0	423	1	0	79	1	1	7
1011	0	423	0	2	79	1	1
1012	0	423	0	4	79	1	1
1013	0	424	1	0	75	1	0	2
1014	0	424	0	1	75	1	0
1015	0	424	0	5	75	1	0
1016	0	424	0	7	75	1	0
1017	0	425	1	12	67	1	1
1018	0	426	1	0	84	0	1
1019	0	427	1	0	53	1	1	7
1020	0	427	0	1	53	1	1
1021	0	428	1	0	48	1	0
1022	0	428	0	3	48	1	0
1023	0	428	0	4	48	1	0
1024	0	428	0	6	48	1	0
1025	0	429	1	0	77	1	1	0
1026	0	429	0	1	77	1	1
1027	0	429	0	2	77	1	1
1028	0	429	0	5	77	1	1
1029	0	429	0	8	77	1	1
1030	0	429	0	11	77	1	1
1031	0	430	1	1	73	1	1
1032	0	431	1	0	58	1	0	0
1033	0	432	1	0	71	0	0
1034	0	432	0	1	71	0	0
1035	0	432	0	3	71	0	0	5
1036	0	433	1	0	54	0	0	0
1037	0	433	0	1	54	0	0
1038	0	433	0	2	54	0	0
1039	0	434	1	0	71	1	0	10
1040	0	434	0	1	71	1	0
1041	0	434	0	3	71	1	0
1042	0	434	0	5	71	1	0
1043	0	434	0	7	71	1	0
1044	0	435	1	8	74	1	0
1045	0	435	0	11	74	1	0
1046	0	436	1	0	57	0	1	1
1047	0	437	1	0	64	1	1	5
1048	0	437	0	2	64	1	1
1049	0	438	1	0	74	1	0	1
1050	0	438	0	2	74	1	0
1051	0	438	0	4	74	1	0
1052	0	439	1	0	82	0	1	6
1053	0	439	0	2	82	0	1
1054	0	440	1	2	74	0	0	0
1055	0	441	1	0	89	1	0	3
1056	0	441	0	1	89	1	0
1057	0	441	0	3	89	1	0
1058	0	442	1	0	74	0	1
1059	0	442	0	1	74	0	1
1060	0	442	0	2	74	0	1
1061	0	442	0	3	74	0	1
1062	0	442	0	6	74	0	1
1063	0	443	1	0	57	0	1	4
1064	0	443	0	2	57	0	1
1065	0	443	0	4	57	0	1
1066	0	443	0	5	57	0	1
1067	0	444	1	0	54	1	1	7
1068	0	444	0	1	54	1	1
1069	0	445	1	0	81	1	0
1070	0	445	0	1	81	1	0
1071	0	445	0	6	81	1	0
1072	0	445	0	8	81	1	0
1073	0	445	0	10	81	1	0
1074	0	445	0	13	81	1	0
1075	0	446	1	2	81	0	1
1076	0	446	0	6	81	0	1
1077	0	446	0	8	81	0	1
1078	0	446	0	11	81	0	1
1079	0	446	0	18	81	0	1
1080	0	446	0	20	81	0	1
1081	0	447	1	1	86	1	0
1082	0	447	0	3	86	1	0
1083	0	447	0	6	86	1	0
1084	0	447	0	8	86	1	0
1085	0	447	0	10	86	1	0
1086	0	447	0	13	86	1	0
1087	0	448	1	0	55	0	0	4
1088	0	448	0	2	55	0	0
1089	0	449	1	0	52	0	0	2
1090	0	449	0	1	52	0	0
1091	0	449	0	4	52	0	0
1092	0	449	0	6	52	0	0
1093	0	449	0	8	52	0	0
1094	0	450	1	0	83	1	0	12
1095	0	450	0	2	83	1	0
1096	0	450	0	3	83	1	0
1097	0	450	0	5	83	1	0
1098	0	451	1	0	75	0	0
1099	0	452	1	0	43	0	1
1100	0	453	1	0	78	1	1	1
1101	0	453	0	4	78	1	1
1102	0	453	0	6	78	1	1
1103	0	453	0	8	78	1	1
1104	0	454	1	7	63	0	0
1105	0	454	0	10	63	0	0
1106	0	455	1	0	56	1	1	4
1107	0	455	0	2	56	1	1
1108	0	455	0	4	56	1	1
1109	0	456	1	0	85	1	0
1110	0	456	0	4	85	1	0
1111	0	457	1	1	64	1	0
1112	0	457	0	3	64	1	0
1113	0	457	0	5	64	1	0
1114	0	457	0	8	64	1	0
1115	0	457	0	10	64	1	0
1116	0	457	0	12	64	1	0
1117	0	458	1	0	78	1	0	0
1118	0	458	0	1	78	1	0
1119	0	459	1	0	75	0	1	10
1120	0	460	1	0	73	1	1
1121	0	460	0	2	73	1	1
1122	0	461	1	0	70	1	0	2
1123	0	461	0	3	70	1	0
1124	0	462	1	1	71	1	0
1125	0	463	1	0	76	1	1	4
1126	0	464	1	0	48	1	0	1
1127	0	464	0	1	48	1	0
1128	0	464	0	3	48	1	0
1129	0	465	1	0	78	1	0	4
1130	0	465	0	3	78	1	0
1131	0	466	1	0	77	1	0	2
1132	0	467	1	0	64	0	0	1
1133	0	468	1	0	74	1	1	6
1134	0	468	0	1	74	1	1
1135	0	469	1	0	69	0	0	3
1136	0	469	0	1	69	0	0
1137	0	470	1	0	79	0	0
1138	0	471	1	0	78	0	0	0
1139	0	471	0	1	78	0	0
1140	0	471	0	4	78	0	0
1141	0	472	1	0	73	1	1
1143	0	472	0	11	73	1	1
1144	0	472	0	13	73	1	1
1145	0	473	1	0	84	0	1
1146	0	473	0	1	84	0	1
1147	0	473	0	3	84	0	1
1148	0	474	1	3	61	1	0
1149	0	474	0	5	61	1	0
1150	0	475	1	0	84	1	1	1
1151	0	476	1	0	75	1	0	4
1152	0	476	0	1	75	1	0
1153	0	477	1	0	75	1	1	3
1154	0	477	0	4	75	1	1
1155	0	477	0	6	75	1	1
1156	0	477	0	8	75	1	1
1157	0	477	0	10	75	1	1
1158	0	478	1	0	73	1	0	0
1159	0	478	0	1	73	1	0
1160	0	478	0	4	73	1	0
1161	0	479	1	0	52	0	0	4
1162	0	479	0	2	52	0	0
1163	0	479	0	4	52	0	0
1164	0	479	0	7	52	0	0
1165	0	480	1	0	76	1	0	0
1166	0	480	0	1	76	1	0
1167	0	480	0	4	76	1	0
1168	0	480	0	6	76	1	0
1169	0	481	1	0	55	0	0	3
1170	0	482	1	0	66	0	0	4
1171	0	483	1	2	58	0	1
1172	0	484	1	0	72	0	0	2
1173	0	484	0	1	72	0	0
1174	0	485	1	0	80	1	0	1
1175	0	485	0	2	80	1	0
1176	0	485	0	5	80	1	0
1177	0	485	0	7	80	1	0
1178	0	485	0	9	80	1	0
1179	0	486	1	0	52	0	0	0
1180	0	486	0	3	52	0	0
1181	0	487	1	0	84	1	1	5
1182	0	487	0	1	84	1	1
1183	0	487	0	3	84	1	1
1184	0	487	0	5	84	1	1
1185	0	488	1	0	87	1	1
1186	0	488	0	2	87	1	1
1187	0	488	0	4	87	1	1
1188	0	488	0	7	87	1	1
1189	0	489	1	0	63	1	0	2
1190	0	489	0	4	63	1	0
1191	0	490	1	4	56	0	0
1192	0	490	0	7	56	0	0
1193	0	491	1	1	68	0	1
1194	0	491	0	2	68	0	1
1195	0	491	0	3	68	0	1
1196	0	491	0	6	68	0	1
1197	0	491	0	8	68	0	1
1198	0	491	0	10	68	0	1
1199	0	492	1	0	59	0	0	5
1200	0	492	0	1	59	0	0
1201	0	493	1	0	42	0	0	3
1202	0	493	0	1	42	0	0
1203	0	494	1	0	65	0	0	2
1204	0	494	0	2	65	0	0
1205	0	494	0	3	65	0	0
1206	0	495	1	0	67	0	1	12
1207	0	495	0	2	67	0	1
1208	0	495	0	4	67	0	1
1209	0	495	0	6	67	0	1
1210	0	495	0	6	67	0	1
1211	0	495	0	7	67	0	1
1212	0	496	1	0	86	1	1	6
1213	0	496	0	1	86	1	1
1214	0	497	1	9	49	1	1
1215	0	497	0	12	49	1	1
1216	0	498	1	0	22	0	0	5
1217	0	498	0	1	22	0	0
1218	0	498	0	3	22	0	0
1219	0	498	0	5	22	0	0
1220	0	499	1	0	87	0	0	2
1221	0	500	1	0	84	1	1	4
1222	0	500	0	1	84	1	1
1223	0	500	0	2	84	1	1
1224	0	500	0	4	84	1	1
1225	0	500	0	7	84	1	1
1226	0	500	0	9	84	1	1
1227	0	501	1	0	85	1	0	0
1228	0	501	0	4	85	1	0
1229	0	501	0	6	85	1	0
1230	0	501	0	8	85	1	0
1231	0	501	0	11	85	1	0
1232	0	502	1	0	57	0	0	1
1233	0	503	1	0	76	1	1
1234	0	503	0	1	76	1	1
1235	0	504	1	0	76	1	0
1236	0	504	0	13	76	1	0
1237	0	504	0	15	76	1	0
1238	0	504	0	18	76	1	0
1239	0	505	1	0	43	0	0	0
1240	0	506	1	0	60	0	1	3
1241	0	506	0	2	60	0	1
1242	0	507	1	0	63	1	0
1243	0	507	0	7	63	1	0
1244	0	508	1	0	73	0	0	4
1245	0	509	1	0	56	0	0	2
1246	0	510	1	0	87	1	0	5
1247	0	510	0	2	87	1	0
1248	0	510	0	4	87	1	0
1249	0	510	0	7	87	1	0
1250	0	511	1	0	77	1	1	6
1251	0	511	0	1	77	1	1
1252	0	512	1	0	77	1	0	13
1253	0	512	0	1	77	1	0
1254	0	512	0	3	77	1	0
1255	0	512	0	5	77	1	0
1256	0	512	0	8	77	1	0
1257	0	512	0	12	77	1	0
1258	0	513	1	0	82	1	1
1259	0	513	0	1	82	1	1
1260	0	513	0	3	82	1	1
1261	0	514	1	0	79	1	1
1262	0	514	0	1	79	1	1
1263	0	514	0	3	79	1	1	11
1264	0	514	0	7	79	1	1
1265	0	514	0	10	79	1	1
1266	0	514	0	11	79	1	1
1267	0	514	0	14	79	1	1
1268	0	514	0	16	79	1	1
1269	0	515	1	1	70	1	0
1270	0	515	0	4	70	1	0
1271	0	516	1	0	79	1	0	4
1272	0	516	0	1	79	1	0
1273	0	516	0	2	79	1	0
1274	0	516	0	4	79	1	0
1275	0	516	0	7	79	1	0
1276	0	517	1	0	58	0	0	4
1277	0	517	0	1	58	0	0
1278	0	517	0	3	58	0	0
1279	0	517	0	5	58	0	0
1280	0	517	0	9	58	0	0
1281	0	517	0	10	58	0	0
1282	0	518	1	0	86	1	1	8
1283	0	519	1	0	57	0	0	4
1284	0	519	0	4	57	0	0
1285	0	519	0	6	57	0	0
1286	0	519	0	8	57	0	0
1287	0	520	1	0	82	0	0	2
1288	0	520	0	3	82	0	0
1289	0	520	0	5	82	0	0
1290	0	520	0	8	82	0	0
1291	0	521	1	0	66	1	0	6
1292	0	522	1	0	82	0	0	2
1293	0	522	0	3	82	0	0
1294	0	523	1	0	52	0	0	0
1295	0	523	0	1	52	0	0
1296	0	524	1	0	85	0	1
1297	0	525	1	0	69	0	1	10
1298	0	525	0	1	69	0	1
1299	0	525	0	3	69	0	1
1300	0	526	1	0	88	1	0	0
1301	0	526	0	1	88	1	0
1302	0	527	1	0	87	1	0	0
1303	0	527	0	3	87	1	0
1304	0	527	0	4	87	1	0
1305	0	527	0	6	87	1	0
1306	0	527	0	8	87	1	0
1307	0	527	0	11	87	1	0
1308	0	528	1	0	83	0	1	7
1309	0	528	0	2	83	0	1
1310	0	529	1	0	89	0	0
1311	0	529	0	3	89	0	0
1312	0	529	0	6	89	0	0
1313	0	529	0	8	89	0	0
1314	0	529	0	13	89	0	0
1315	0	530	1	0	72	0	1	3
1316	0	530	0	2	72	0	1
1317	0	530	0	8	72	0	1
1318	0	531	1	0	61	0	0	0
1319	0	532	1	0	35	0	0	1
1320	0	533	1	0	75	0	0	2
1321	0	533	0	1	75	0	0
1322	0	533	0	4	75	0	0
1323	0	533	0	6	75	0	0
1324	0	534	1	0	89	0	1
1325	0	534	0	2	89	0	1
1326	0	534	0	4	89	0	1
1327	0	534	0	5	89	0	1
1328	0	534	0	7	89	0	1
1329	0	535	1	0	69	0	1	6
1330	0	536	1	0	67	0	0	4
1331	0	536	0	2	67	0	0
1332	0	537	1	0	77	1	0	4
1333	0	537	0	2	77	1	0
1334	0	537	0	4	77	1	0
1335	0	537	0	7	77	1	0
1336	0	538	1	0	63	0	0	1
1337	0	539	1	0	70	1	0	0
1338	0	539	0	1	70	1	0
1339	0	539	0	3	70	1	0
1340	0	539	0	5	70	1	0
1341	0	540	1	0	48	1	0	1
1342	0	540	0	2	48	1	0
1343	0	540	0	4	48	1	0
1344	0	540	0	5	48	1	0
1345	0	541	1	0	65	0	1	0
1346	0	541	0	1	65	0	1	1
1347	0	542	1	0	34	0	0	0
1348	0	542	0	4	34	0	0
1349	0	543	1	0	71	1	0	1
1350	0	544	1	0	39	0	0
1351	0	544	0	1	39	0	0
1352	0	544	0	3	39	0	0
1353	0	544	0	4	39	0	0	1
1354	0	544	0	6	39	0	0
1355	0	545	1	0	57	1	0
1356	0	545	0	2	57	1	0
1357	0	546	1	0	63	1	0	6
1358	0	547	1	0	51	1	1
1359	0	547	0	7	51	1	1	6
1360	0	547	0	7	51	1	1	5
1361	0	547	0	8	51	1	1	5
1362	0	547	0	9	51	1	1	4
1363	0	547	0	10	51	1	1	3
1364	0	547	0	11	51	1	1	2
1365	0	547	0	12	51	1	1	2
1366	0	547	0	13	51	1	1	4
1367	0	547	0	14	51	1	1	1
1368	0	547	0	15	51	1	1	0
1369	0	547	0	16	51	1	1	1
1370	0	548	1	0	35	1	1
1371	0	548	0	2	35	1	0
1372	0	549	1	0	66	1	0
1373	0	549	0	5	66	1	0
1374	0	549	0	9	66	1	0
1375	0	549	0	13	66	1	0
1376	0	549	0	15	66	1	0	13
1377	0	549	0	16	66	1	0	9
1378	0	549	0	19	66	1	0	9
1379	0	550	1	0	47	0	0
1380	0	551	1	0	76	1	0
1381	0	551	0	2	76	1	0
1382	0	551	0	6	76	1	0
1383	0	551	0	9	76	1	0
1384	0	552	1	0	50	1	0
1385	0	552	0	5	50	1	0
1386	0	552	0	7	50	1	0
1387	0	552	0	8	50	1	0
1388	0	553	1	0	26	0	0
1389	0	553	0	2	26	0	0
1390	0	554	1	0	70	1	1
1391	0	554	0	4	70	1	1	6
1392	0	554	0	5	70	1	1	5
1393	0	554	0	6	70	1	1	11
1394	0	554	0	7	70	1	1	11
1395	0	554	0	8	70	1	1	4
1396	0	554	0	9	70	1	1	4
1397	0	554	0	10	70	1	1	2
1398	0	554	0	11	70	1	1	2
1399	0	555	1	0	38	1	1
1400	0	555	0	3	38	1	1	8
1401	0	555	0	4	38	1	1	6
1402	0	555	0	5	38	1	1	8
1403	0	555	0	6	38	1	1	7
1404	0	555	0	7	38	1	1	7
1405	0	555	0	8	38	1	1	7
1406	0	555	0	9	38	1	1	7
1407	0	555	0	10	38	1	1	5
1408	0	555	0	11	38	1	1	5
1409	0	555	0	12	38	1	1	3
1410	0	556	1	0	71	1	1	3
1411	0	556	0	4	71	1	1	11
1412	0	556	0	5	71	1	1	10
1413	0	556	0	6	71	1	1	16
1414	0	556	0	7	71	1	1	16
1415	0	556	0	8	71	1	1	15
1416	0	556	0	9	71	1	1	13
1417	0	556	0	10	71	1	1	7
1418	0	556	0	11	71	1	1	8
1419	0	556	0	12	71	1	1	7
1420	0	556	0	13	71	1	1	5
1421	0	557	1	0	81	1	1
1422	0	557	0	2	81	1	1	5
1423	0	558	1	0	40	1	1
1424	0	558	0	0	40	1	1	8
1425	0	558	0	1	40	1	1	4
1426	0	558	0	2	40	1	1	6
1427	0	558	0	3	40	1	1	6
1428	0	558	0	4	40	1	1	4
1429	0	558	0	4	40	1	1	2
1430	0	558	0	5	40	1	1	1
1431	0	558	0	6	40	1	1	0
1432	0	558	0	7	40	1	1	1
1433	0	558	0	8	40	1	1
1434	0	559	1	0	80	0	1
1435	0	559	0	0	80	0	1	2
1436	0	559	0	2	80	0	1	1
1437	0	559	0	2	80	0	1	4
1438	0	559	0	3	80	0	1	5
1439	0	559	0	4	80	0	1	8
1440	0	559	0	5	80	0	1	13
1441	0	559	0	6	80	0	1	18
1442	0	559	0	7	80	0	1	16
1443	0	559	0	8	80	0	1	11
1444	0	559	0	9	80	0	1
1445	0	560	1	0	75	1	1
1446	0	560	0	1	75	1	1	13
1447	0	560	0	2	75	1	1	16
1448	0	560	0	3	75	1	1	18
1449	0	560	0	4	75	1	1	22
1450	0	560	0	5	75	1	1	18
1451	0	560	0	6	75	1	1	15
1452	0	560	0	7	75	1	1	12
1453	0	560	0	8	75	1	1	8
1454	0	560	0	9	75	1	1	9
1455	0	560	0	10	75	1	1	10
1456	0	561	1	0	73	1	0
1457	0	561	0	1	73	1	0	7
1458	0	561	0	2	73	1	0	6
1459	0	561	0	7	73	1	0	0
1460	0	562	1	0	73	1	0
1461	0	562	0	3	73	1	0	1
1462	0	563	1	0	59	0	0
1463	0	563	0	1	59	0	0	0
1464	0	563	0	2	59	0	0	0
1465	0	564	1	0	26	0	0
1466	0	564	0	5	26	0	0
1467	0	564	0	7	26	0	0	2
1468	0	565	1	0	63	1	0
1469	0	565	0	2	63	1	0	5
1470	0	565	0	4	63	1	0	8
1471	0	565	0	7	63	1	0	0
1472	0	566	1	0	56	1	1
1473	0	566	0	2	56	1	1	10
1474	0	566	0	4	56	1	1	15
1475	0	566	0	5	56	1	1	19
1476	0	566	0	5	56	1	1	14
1477	0	566	0	5	56	1	1	16
1478	0	566	0	6	56	1	1	16
1479	0	566	0	7	56	1	1	13
1480	0	566	0	10	56	1	1	14
1481	0	566	0	11	56	1	1	12
1482	0	567	1	0	63	0	1
1483	0	567	0	4	63	0	1	12
1484	0	567	0	5	63	0	1	12
1485	0	567	0	6	63	0	1	11
1486	0	567	0	7	63	0	1	10
1487	0	567	0	8	63	0	1	9
1488	0	567	0	9	63	0	1	9
1489	0	567	0	10	63	0	1	8
1490	0	567	0	11	63	0	1	8
1491	0	567	0	12	63	0	1	5
1492	0	567	0	13	63	0	1	6
1493	0	568	1	0	62	1	0
1494	0	568	0	1	62	1	0	9
1495	0	569	1	0	75	1	0	1
1496	0	569	0	1	75	1	0	0
1497	0	569	0	1	75	1	0	0
1498	0	570	1	0	48	0	0	2
1499	0	570	0	1	48	0	0	1
1500	0	570	0	3	48	0	0	0
1501	0	571	1	0	56	1	0	5
1502	0	571	0	1	56	1	0	5
1503	0	571	0	2	56	1	0	3
1504	0	571	0	3	56	1	0	2
1505	0	572	1	0	69	1	1	6
1506	0	572	0	1	69	1	1	4
1507	0	573	1	4	71		1	14
1508	0	574	1	2	65		0
1509	0	574	0	4	65		0
1510	0	574	0	6	65		0	2
1511	0	574	0	11	65		0	4
1512	0	574	0	13	65		0	6
1513	0	574	0	15	65		0	5
1514	0	574	0	17	65		0	4
1515	0	575	1	4	65		0
1516	0	576	1	13	64		0	0
1517	0	577	1	5	77		1	8
1518	0	577	0	7	77		1	14
1519	0	577	0	10	77		1	11
1520	0	578	1	4	42		0	6
1521	0	579	1	5	56		0	0
1522	0	579	0	9	56		0	0
1523	0	579	0	11	56		0	2
1524	0	579	0	13	56		0	3
1525	0	579	0	16	56		0	0
1526	0	580	1	0	86		1
1527	0	580	0	5	86		1	7
1528	0	581	1	2	78		1	1
1529	0	581	0	4	78		1	4
1530	0	581	0	7	78		1	7
1531	0	581	0	9	78		1	6
1532	0	581	0	11	78		1	7
1533	0	581	0	14	78		1	7
1534	0	582	1	1	77		1
1535	0	582	0	3	77		1
1536	0	582	0	4	77		1
1537	0	582	0	6	77		1	1
1538	0	582	0	8	77		1	6
1539	0	583	1	1	66		1
1540	0	583	0	2	66		1
1541	0	583	0	3	66		1	7
1542	0	583	0	5	66		1	5
1543	0	583	0	8	66		1	12
1544	0	583	0	10	66		1	11
1545	0	583	0	10	66		1	9
1546	0	583	0	12	66		1	8
1547	0	583	0	15	66		1	7
1548	0	584	1	1	46		0
1549	0	584	0	6	46		0	2
1550	0	584	0	9	46		0	0
1551	0	584	0	13	46		0	0
1552	0	585	1	1	90		0	2
1553	0	585	0	3	90		0	3
1554	0	585	0	5	90		0	1
1555	0	586	1	0	82		0
1556	0	586	0	2	82		0	0
1557	0	587	1	0	67		1
1558	0	587	0	2	67		1	1
1559	0	587	0	4	67		1	1
1560	0	587	0	5	67		1	4
1561	0	587	0	7	67		1	4
1562	0	587	0	9	67		1	4
1563	0	587	0	12	67		1	1
1564	0	588	1	1	81		0	6
1565	0	588	0	3	81		0	1
1566	0	589	1	1	74		0	1
1567	0	589	0	3	74		0	0
1568	0	590	1	1	76		0
1569	0	590	0	2	76		0
1570	0	590	0	5	76		0
1571	0	590	0	7	76		0	0
1572	0	591	1	0	53		0
1573	0	591	0	1	53		0
1574	0	591	0	2	53		0	5
1575	0	591	0	4	53		0	3
1576	0	592	1	0	68		0
1577	0	592	0	5	68		0	2
1578	0	592	0	7	68		0	1
1579	0	592	0	9	68		0	2
1580	0	592	0	11	68		0	3
1581	0	593	1	0	77		0
1582	0	593	0	3	77		0	1
1583	0	594	1	1	74		1	2
1584	0	594	0	2	74		1	2
1585	0	594	0	5	74		1	6
1586	0	594	0	5	74		1	1
1587	0	594	0	7	74		1	8
1588	0	594	0	9	74		1	5
1589	0	594	0	12	74		1	8
1590	0	595	1	0	81		0
1591	0	595	0	2	81		0	0
1592	0	596	1	0	79		0
1593	0	596	0	8	79		0
1594	0	596	0	9	79		0	6
1595	0	597	1	0	85		1
1596	0	597	0	2	85		1	6
1597	0	598	1	0	83		0
1598	0	598	0	2	83		0	0
1599	0	599	1	0	69		0
1600	0	599	0	1	69		0	5
1601	0	599	0	2	69		0	6
1602	0	599	0	4	69		0	4
1603	0	599	0	6	69		0	0
1604	0	599	0	8	69		0	0
1605	0	599	0	9	69		0	0
1606	0	599	0	11	69		0	0
1607	0	600	1	0	68		0
1608	0	600	0	1	68		0	3
1609	0	600	0	3	68		0	1
1610	0	601	1	0	42		0
1611	0	601	0	2	42		0	7
1612	0	601	0	4	42		0	1
1613	0	602	1	1	69		0	2
1614	0	602	0	3	69		0	3
1615	0	602	0	4	69		0	2
1616	0	602	0	6	69		0	8
1617	0	602	0	8	69		0	8
1618	0	602	0	10	69		0	4
1619	0	603	1	2	47		1	3
1620	0	603	0	4	47		1	6
1621	0	603	0	6	47		1	12
1622	0	603	0	7	47		1	8
1623	0	603	0	8	47		1	11
1624	0	603	0	9	47		1	10
1625	0	603	0	10	47		1	8
1626	0	603	0	11	47		1	8
1627	0	604	1	0	65		1
1628	0	604	0	3	65		1	2
1629	0	604	0	5	65		1	2
1630	0	604	0	7	65		1	2
1631	0	605	1	1	76		1
1632	0	605	0	4	76		1
1633	0	605	0	7	76		1	4
1634	0	605	0	9	76		1	6
1635	0	606	1	1	78		0	1
1636	0	606	0	2	78		0	1
1637	0	607	1	0	70		0	1
1638	0	607	0	1	70		0	0
1639	0	607	0	2	70		0	1
1640	0	607	0	4	70		0
1641	0	607	0	6	70		0	1
1642	0	607	0	8	70		0	1
1643	0	608	1	0	73		1	5
1644	0	608	0	2	73		1	7
1645	0	608	0	4	73		1	8
1646	0	609	1	0	70		1
1647	0	609	0	1	70		1	9
1648	0	609	0	3	70		1	8
1649	0	609	0	5	70		1	13
1650	0	609	0	5	70		1	12
1651	0	610	1	0	69		1
1652	0	610	0	2	69		1	2
1653	0	610	0	4	69		1	8
1654	0	610	0	5	69		1	10
1655	0	610	0	7	69		1	14
1656	0	610	0	10	69		1	11
1657	0	611	1	0	82		0
1658	0	611	0	2	82		0	3
1659	0	612	1	0	64		0	0
1660	0	612	0	2	64		0	3
1661	0	612	0	4	64		0	3
1662	0	613	1	0	69		1
1663	0	613	0	1	69		1	7
1664	0	613	0	6	69		1	9
1665	0	613	0	9	69		1	7
1666	0	614	1	0	62		0
1667	0	614	0	8	62		0	2
1668	0	614	0	10	62		0	5
1669	0	614	0	12	62		0	2
1670	0	614	0	14	62		0	5
1671	0	614	0	16	62		0	5
1672	0	614	0	18	62		0	7
1673	0	615	1	1	52		0	4
1674	0	615	0	2	52		0	7
1675	0	615	0	4	52		0	7
1676	0	616	1	1	81		1	7
1677	0	616	0	3	81		1	4
1678	0	616	0	4	81		1	3
1679	0	616	0	6	81		1	7
1680	0	617	1	0	83		1
1681	0	617	0	1	83		1	0
1682	0	617	0	3	83		1	2
1683	0	617	0	5	83		1	6
1684	0	618	1	2	76		0	8
1685	0	618	0	4	76		0	6
1686	0	618	0	6	76		0	4
1687	0	618	0	8	76		0	2
1688	0	619	1	2	54		0	2
1689	0	619	0	4	54		0	1
1690	0	620	1	3	60		1	8
1691	0	620	0	3	60		1	8
1692	0	620	0	5	60		1	7
1693	0	620	0	8	60		1	10
1694	0	621	1	2	78		1	6
1695	0	622	1	0	54		0
1696	0	622	0	5	54		0	5
1697	0	623	1	0	65		0	1
1698	0	623	0	2	65		0	1
1699	0	623	0	4	65		0	3
1700	0	623	0	6	65		0	1
1701	0	624	1	0	80		1	4
1702	0	624	0	1	80		1	1
1703	0	624	0	3	80		1	2
1704	0	625	1	0	74		1	9
1705	0	625	0	2	74		1	22
1706	0	625	0	3	74		1	18
1707	0	625	0	4	74		1	17
1708	0	625	0	7	74		1	16
1710	0	627	1	0	63		0	7
1711	0	627	0	1	63		0
1712	0	627	0	3	63		0	2
1713	0	627	0	5	63		0	2
1714	0	628	1	0	71		0	1
1715	0	628	0	1	71		0	2
1716	0	628	0	3	71		0	5
1717	0	629	1	0	68		0	2
1718	0	629	0	1	68		0	5
1719	0	629	0	5	68		0	2
1720	0	630	1	0	65		0	5
1721	0	630	0	1	65		0	5
1722	0	630	0	3	65		0	3
1723	0	631	1	0	31		0	0
1724	0	631	0	2	31		0	1
1725	0	631	0	4	31		0	2
1726	0	631	0	6	31		0	2
1727	0	632	1	0	57		0	0
1728	0	632	0	2	57		0	0
1729	0	632	0	4	57		0	1
1730	0	632	0	6	57		0	4
1731	0	633	1	0	61		0
1732	0	633	0	3	61		0	0
1733	0	633	0	5	61		0	2
1734	0	633	0	7	61		0	0
1735	0	634	1	0	70		1	3
1736	0	634	0	2	70		1	3
1737	0	634	0	5	70		1	10
1738	0	634	0	8	70		1	10
1739	0	635	1	0	49		0
1740	0	635	0	5	49		0	0
1741	0	635	0	6	49		0	3
1742	0	636	1	0	73		0	4
1743	0	636	0	1	73		0	2
1744	0	636	0	3	73		0	1
1745	0	636	0	5	73		0	1
1746	0	637	1	0	49		0	0
1747	0	637	0	2	49		0	0
1748	0	637	0	4	49		0	1
1749	0	638	1	0	74		0	0
1750	0	638	0	2	74		0	0
1751	0	639	1	0	75		0	0
1752	0	639	0	1	75		0	0
1753	0	639	0	3	75		0	0
1754	0	640	1	0	72		1	1
1755	0	640	0	2	72		1	1
1756	0	640	0	6	72		1	7
1757	0	640	0	8	72		1	8
1758	0	641	1	0	84		1	6
1759	0	641	0	1	84		1	8
1760	0	642	1	0	47		0	0
1761	0	642	0	5	47		0	0
1762	0	642	0	7	47		0	0
1763	0	643	1	0	75		0	3
1764	0	643	0	1	75		0	3
1765	0	643	0	3	75		0	5
1766	0	643	0	5	75		0	4
1767	0	643	0	7	75		0	8
1768	0	644	1	0	61		0	0
1769	0	644	0	1	61		0	0
1770	0	645	1	0	64		0
1771	0	645	0	9	64		0	4
1772	0	645	0	13	64		0	3
1773	0	646	1	0	84		1	4
1774	0	646	0	2	84		1	6
1775	0	646	0	6	84		1	16
1776	0	647	1	0	82		1	0
1777	0	647	0	2	82		1	4
1778	0	648	1	0	75		0	0
1779	0	649	1	0	57		0	1
1780	0	649	0	1	57		0	3
1781	0	649	0	3	57		0	0
1782	0	649	0	6	57		0	2
1783	0	650	1	2	73		1	4
1784	0	651	1	10	40		0	2
1785	0	651	0	13	40		0	1
1786	0	651	0	16	40		0	3
1787	0	652	1	0	57		0	3
1788	0	652	0	2	57		0	1
1789	0	652	0	3	57		0	4
1790	0	652	0	5	57		0	4
1791	0	653	1	0	77		1	1
1792	0	653	0	2	77		1	3
1793	0	653	0	5	77		1	10
1794	0	654	1	0	62		0	2
1795	0	654	0	2	62		0	0
1796	0	655	1	0	74		0	1
1797	0	655	0	2	74		0	0
1798	0	656	1	0	75		0	1
1799	0	656	0	2	75		0	1
1800	0	656	0	3	75		0	0
1801	0	657	1	0	73		0	3
1802	0	657	0	2	73		0	3
1803	0	658	1	0	63		0	0
1804	0	658	0	1	63		0	0
1805	0	658	0	3	63		0	5
1806	0	658	0	5	63		0	4
1807	0	659	1	0	90		1	0
1808	0	659	0	4	90		1	8
1809	0	660	1	0	57		0	3
1810	0	660	0	2	57		0	0
1811	0	661	1	0	58		0	1
1812	0	661	0	2	58		0	2
1813	0	662	1	0	63		0	1
1814	0	662	0	1	63		0	5
1815	0	662	0	3	63		0	1
1816	0	663	1	0	86		1	2
1817	0	663	0	2	86		1	7
1818	0	663	0	4	86		1	7
1819	0	664	1	0	52		0	0
1820	0	664	0	2	52		0	0
1821	0	665	1	0	73		0	0
1822	0	665	0	1	73		0	8
1823	0	665	0	2	73		0	1
1824	0	665	0	4	73		0	3
1825	0	665	0	5	73		0	4
1826	0	666	1	0	68		1	4
1827	0	666	0	2	68		1	8
1828	0	666	0	4	68		1
1829	0	666	0	6	68		1	7
1830	0	667	1	0	68		0	6
1831	0	668	1	5	78		1	0
1832	0	669	1	4	49		0	8
1833	0	670	1	0	53		0	0
1834	0	670	0	3	53		0	2
1835	0	671	1	0	76		0	3
1836	0	672	1	0	75		1	5
1837	0	672	0	1	75		1	4
1838	0	672	0	3	75		1	5
1839	0	673	1	0	58		0	0
1840	0	673	0	3	58		0	0
1841	0	674	1	0	67		1	9
1842	0	674	0	3	67		1	8
1843	0	675	1	0	83		0	3
1844	0	676	1	0	77		1	5
1845	0	676	0	1	77		1	4
1846	0	676	0	3	77		1	7
1847	0	677	1	0	82		1	0
1848	0	677	0	2	82		1	0
1849	0	677	0	4	82		1	1
1850	0	678	1	0	88		1	3
1851	0	678	0	1	88		1	6
1852	0	678	0	3	88		1	8
1853	0	679	1	0	62		0	2
1854	0	679	0	2	62		0	1
1855	0	680	1	0	72		0
1856	0	680	0	2	72		0	5
1857	0	681	1	0	68		0	1
1858	0	681	0	2	68		0	0
1859	0	682	1	0	63		0	4
1860	0	682	0	1	63		0	5
1861	0	682	0	3	63		0	2
1862	0	683	1	0	44		0	0
1863	0	683	0	5	44		0	0
1864	0	683	0	6	44		0	0
1865	0	683	0	7	44		0	0
1866	0	684	1	0	69		0	1
1867	0	684	0	3	69		0	2
1868	0	685	1	0	75		1	1
1869	0	685	0	1	75		1	4
1870	0	685	0	3	75		1	5
1871	0	686	1	0	79		1	0
1872	0	686	0	1	79		1	0
1873	0	686	0	2	79		1	3
1874	0	686	0	4	79		1	6
1875	0	687	1	0	77		1	7
1876	0	687	0	3	77		1	4
1877	0	688	1	0	67		0	3
1878	0	688	0	1	67		0	1
1879	0	689	1	1	87		0	2
1880	0	689	0	3	87		0	7
1881	0	690	1	0	85		1	0
1882	0	690	0	2	85		1	2
1883	0	691	1	1	64		0	0
1884	0	691	0	2	64		0	0
1885	0	692	1	0	67		0	0
1886	0	692	0	2	67		0	0
1887	0	693	1	0	58		1	0
1888	0	693	0	3	58		1	7
1889	0	694	1	0	56		0	4
1890	0	694	0	1	56		0	3
1891	0	694	0	3	56		0	4
1892	0	695	1	3	66	1	1	20
1893	0	695	0	4	66	1	1	20
1894	0	695	0	5	66	1	1	24
1895	0	695	0	6	66	1	1	24
1896	0	695	0	7	66	1	1	23
1897	0	696	1	3	49	1	1	5
1898	0	696	0	3	49	1	1	7
1899	0	696	0	3	49	1	1	2
1900	0	696	0	3	49	1	1	8
1901	0	696	0	20	49	1	1	3
1902	0	696	0	21	49	1	1	3
1903	0	696	0	22	49	1	1	3
1904	0	696	0	23	49	1	1	2
1905	0	696	0	24	49	1	1	1
1906	0	697	1	2	61	1	0
1907	0	697	0	3	61	1	0
1908	0	698	1	20	56	1	1	3
1909	0	698	0	21	56	1	1	3
1910	0	698	0	22	56	1	1	6
1911	0	698	0	23	56	1	1	2
1912	0	698	0	24	56	1	1	3
1913	0	698	0	25	56	1	1	1
1914	0	698	0	26	56	1	1	0
1916	0	700	1	0	62	1	0	2
1928	0	703	1	2	59	1	1	7
1929	0	703	0	3	59	1	1	12
1930	0	703	0	4	59	1	1	12
1931	0	703	0	5	59	1	1	13
1932	0	703	0	6	59	1	1	16
1933	0	703	0	7	59	1	1	16
1934	0	703	0	8	59	1	1	16
1935	0	704	1	2	72	1	1	7
1936	0	704	0	3	72	1	1	7
1937	0	704	0	4	72	1	1	7
1938	0	704	0	5	72	1	1	8
1939	0	704	0	6	72	1	1	8
1940	0	704	0	7	72	1	1	9
1941	0	704	0	8	72	1	1	9
1942	0	705	1	1	54	0	1	7
1943	0	705	0	3	54	0	1	9
1944	0	705	0	4	54	0	1	8
1945	0	705	0	5	54	0	1	5
1946	0	705	0	6	54	0	1	5
1947	0	706	1	5	68	0	0
1948	0	707	1	3	42	0	0	0
1949	0	707	0	5	42	0	0
1950	0	708	1	0	58	0	0	4
1951	0	709	1	0	74	1	1	4
1952	0	709	0	1	74	1	1	3
1953	0	709	0	2	74	1	1	1
1954	0	709	0	3	74	1	1	4
1955	0	709	0	4	74	1	1	6
1956	0	710	1	1	68	1	1	4
1957	0	710	0	1	68	1	1	13
1958	0	710	0	2	68	1	1	19
1959	0	710	0	4	68	1	1	16
1960	0	711	1	3	73	1	1	7
1961	0	711	0	3	73	1	1	11
1962	0	711	0	4	73	1	1	8
1963	0	712	1	0	62	1	1	1
1964	0	712	0	1	62	1	1	2
1965	0	712	0	2	62	1	1	6
1966	0	712	0	3	62	1	1	14
1967	0	712	0	4	62	1	1	11
1968	0	713	1	0	18	0	0	0
1969	0	714	1	3	83	0	0	0
1970	0	715	1	1	74	1	0	5
1971	0	716	1	3	77	1	0	2
1972	0	717	1	0	61	1	1	5
1973	0	717	0	0	61	1	1	9
1974	0	717	0	1	61	1	1	10
1975	0	717	0	2	61	1	1	7
1976	0	718	1	0	61	1	1	9
1977	0	718	0	1	61	1	1	14
1978	0	718	0	2	61	1	1	10
1979	0	719	1	0	69	1	0	1
1980	0	720	1	0	74	1	0	2
1981	0	721	1	0	76	1	1	12
1982	0	721	0	1	76	1	1	10
1983	0	722	1	0	61	0	0	0
1984	0	723	1	0	70	1	1	10
1985	0	723	0	1	70	1	1	12
1986	0	724	1	1	77	1	1	3
1987	0	724	0	1	77	1	1	6
1988	0	725	1	0	69	1	1	2
1989	0	726	1	0	54	1	1	1
1991	0	728	1	0	67	0	0
1992	0	729	1	0	74	1	1	0
1993	0	729	0	0	74	1	1	0
1994	0	730	1	0	53	1	1	6
1995	0	730	0	1	53	1	1	2
1996	0	730	0	2	53	1	1	3
1997	0	730	0	3	53	1	1	5
1998	0	730	0	4	53	1	1	8
1999	0	731	1	1	56	1	0	0
2000	0	732	1	0	38	1	0	0
2001	0	733	1	0	76	1	1	1
2002	0	734	1	0	70	1	0	1
2003	0	735	1	4	73	1	1	6
2004	0	735	0	4	73	1	1	6
2005	0	735	0	5	73	1	1	4
2006	0	735	0	6	73	1	1	10
2007	0	735	0	7	73	1	1	9
2008	0	735	0	8	73	1	1	8
2009	0	735	0	9	73	1	1	8
2010	0	736	1	0	33	0	0	0
2011	0	737	1	0	57	1	1	2
2012	0	737	0	1	57	1	1	3
2013	0	737	0	2	57	1	1	7
2014	0	738	1	0	62	0	0	0
2015	0	739	1	2	61	1	1
2016	0	739	0	4	61	1	1
2017	0	740	1	1	77	1	0
2018	0	740	0	2	77	1	0
[truncated: 589 more rows]
